# Supplementary material for: A curative combination cancer therapy achieves high fractional cell killing through low cross-resistance and drug additivity
Source: eLife. 2019 Nov 19;8:e50036. doi: 10.7554/eLife.50036 (PMC6897534; doi:10.7554/eLife.50036)
Supplement: Figure 5—source data 2. [file elife-50036-fig5-data2.xlsx]

## Sheet: Cri screen
	sgRNA phenotype scores
	O			C			H			R
CRISPRi sgRNA	gamma	rho	tau	gamma	rho	tau	gamma	rho	tau	gamma	rho	tau
A1BG_+_58858549.23-P1	0.0526043	-0.0586071	0.0483385	0.0526043	-0.234907	-0.761124	0.0526043	0.216199	0.560038	0.0496684	0.121413	0.371507
A1BG_+_58858791.23-P1	0.00993131	-0.101006	-0.165832	0.00993131	-0.164271	-0.674714	0.00993131	-0.074193	-0.10587	0.0424522	0.352124	0.771775
A1BG_+_58858964.23-P1	-0.0110334	-0.424627	-0.881453	-0.0110334	0.119023	0.517167	-0.0110334	0.295738	0.526154	0.0163832	-0.150127	-0.217549
A1BG_+_58864367.23-P2	-0.00906973	0.176428	0.336146	-0.00906973	-0.303195	-1.42401	-0.00906973	0.134298	0.229706	0.00218026	-0.0876673	-0.143769
A1BG_+_58864705.23-P2	0.0689772	-0.471069	-0.73377	0.0689772	-0.262298	-0.795616	0.0689772	-0.248635	-0.262754	0.031038	-0.489465	-0.794871
A1BG_-_58858562.23-P1	0.00342048	0.423233	0.871353	0.00342048	0.170763	0.837757	0.00342048	0.302303	0.57994	-0.00907123	-0.0815951	-0.164463
A1BG_-_58858617.23-P1	0.0161723	0.343621	0.749319	0.0161723	-0.0484179	-0.103909	0.0161723	-0.0280432	-0.00159497	-0.0336923	-0.123065	-0.309584
A1BG_-_58858630.23-P1	0.0250784	0.346432	0.781847	0.0250784	-0.0577023	-0.0967076	0.0250784	0.157203	0.370611	0.0254689	-0.123403	-0.143175
A1BG_-_58858788.23-P1	-0.0592736	0.0154851	-0.139712	-0.0592736	0.0620146	-0.0179584	-0.0592736	-0.295453	-0.718597	0.0974071	-0.30761	-0.27593
A1BG_-_58858915.23-P1	0.0150854	0.146451	0.348564	0.0150854	-0.0286063	-0.018422	0.0150854	0.0780865	0.193876	-0.0392117	0.289429	0.42691
A1BG_-_58858950.23-P1	-0.0237757	-0.255522	-0.578982	-0.0237757	0.342395	1.47826	-0.0237757	-0.429626	-0.867741	-0.00244847	0.0844964	0.15706
A1BG_-_58858991.23-P1	0.0845634	0.0356848	0.334809	0.0845634	-0.316733	-0.959579	0.0845634	-0.142722	-0.0198176	0.0134373	-0.265628	-0.436454
A1BG_-_58864354.23-P2	-0.0011315	-0.0951053	-0.187301	-0.0011315	-0.0471668	-0.195522	-0.0011315	0.0679534	0.128352	-0.0256376	-0.436464	-0.858247
A1BG_-_58864360.23-P2	0.0366628	-0.317827	-0.522304	0.0366628	0.0322893	0.384598	0.0366628	-0.20725	-0.278096	-0.048143	0.264867	0.356913
A1BG_-_58864420.23-P2	-0.00578598	-0.0799667	-0.170821	-0.00578598	0.159539	0.734037	-0.00578598	-0.294019	-0.562338	0.0482703	-0.434347	-0.645727
A1BG_-_58864428.23-P2	-0.00717523	0.475922	0.945614	-0.00717523	0.238388	1.0908	-0.00717523	0.0840384	0.141098	0.0148795	-0.114873	-0.157518
A1BG_-_58864436.23-P2	0.0147702	-0.0710669	-0.0908838	0.0147702	-0.156777	-0.612827	0.0147702	-0.172795	-0.276483	-0.0116992	-0.0258738	-0.0702893
A1BG_-_58864715.23-P2	-0.00571556	-0.0564141	-0.123128	-0.00571556	-0.177633	-0.824571	-0.00571556	0.191346	0.346083	-0.053321	0.198098	0.220558
A1BG_-_58864822.23-P2	-0.0189438	0.0800994	0.112176	-0.0189438	0.213565	0.909779	-0.0189438	-0.129012	-0.291355	-0.00835845	-0.0149511	-0.0409426
A1BG_-_58864840.23-P2	-0.0593789	-0.244819	-0.664782	-0.0593789	0.577767	2.36617	-0.0593789	0.111756	0.043075	-0.0153456	0.100624	0.150052
A1CF_+_52645000.23-P1P2	-0.0134763	0.176464	0.322929	-0.0134763	-0.021685	-0.147185	-0.0134763	0.0706457	0.0979455	0.0425498	-0.0362281	0.0639907
A1CF_+_52645034.23-P1P2	-0.083872	0.326474	0.413028	-0.083872	-0.161955	-1.192	-0.083872	-0.0292918	-0.29118	0.0055964	-0.131978	-0.214913
A1CF_+_52645080.23-P1P2	-0.00664098	0.148004	0.286169	-0.00664098	0.384273	1.76834	-0.00664098	0.129329	0.22738	-0.0102732	-0.0664615	-0.140264
A1CF_+_52645091.23-P1P2	0.0733568	-0.37997	-0.536914	0.0733568	-0.141181	-0.210947	0.0733568	0.108311	0.417742	-0.0116711	0.00529757	-0.0133769
A1CF_+_52645339.23-P1P2	0.00616118	-0.355879	-0.691005	0.00616118	-0.0159956	-0.0103449	0.00616118	-0.195005	-0.34276	-0.010569	0.192617	0.331264
A1CF_+_52645358.23-P1P2	0.0108271	-0.0138313	0.0126064	0.0108271	0.263827	1.30975	0.0108271	-0.0113163	0.0143574	-0.0148384	-0.266941	-0.518676
A1CF_+_52645377.23-P1P2	0.0846873	0.0258097	0.315275	0.0846873	-0.0993937	0.0460431	0.0846873	-0.185551	-0.0996041	0.0191243	0.0974593	0.2416
A1CF_-_52645011.23-P1P2	-0.00611029	0.230076	0.453222	-0.00611029	0.125728	0.57588	-0.00611029	-0.0760495	-0.155403	0.028624	0.0174416	0.122528
A1CF_-_52645249.23-P1P2	0.0216645	-0.176804	-0.283248	0.0216645	-0.0941471	-0.284435	0.0216645	-0.193309	-0.295073	-0.0933724	0.163413	0.0442432
A1CF_-_52645373.23-P1P2	-0.0296519	0.00243685	-0.0766797	-0.0296519	0.303449	1.26511	-0.0296519	-0.12948	-0.322975	0.00803659	-0.0451758	-0.0497624
A2ML1_+_8975211.23-P1P2	-0.00338731	-0.15055	-0.305876	-0.00338731	-0.0196836	-0.0811432	-0.00338731	-0.192821	-0.36609	0.00890184	-0.150907	-0.240094
A2ML1_+_8975278.23-P1P2	-0.0368376	-0.496106	-1.10337	-0.0368376	0.116638	0.360895	-0.0368376	0.150458	0.180216	-0.0500465	0.297558	0.411143
A2ML1_+_8975452.23-P1P2	0.0180731	-0.142984	-0.225901	0.0180731	0.0181066	0.214384	0.0180731	-0.0194646	0.0199148	0.0450222	-0.0920385	-0.0307852
A2ML1_-_8975403.23-P1P2	0.0718531	0.0716691	0.369017	0.0718531	-0.265455	-0.794025	0.0718531	-0.114384	-0.00328469	0.0444564	-0.00128774	0.133078
A2ML1_-_8975471.23-P1P2	0.00490369	0.0412725	0.105826	0.00490369	0.320235	1.53723	0.00490369	-0.500394	-0.917818	-0.0139347	-0.00204191	-0.0331491
A2ML1_-_8975487.23-P1P2	0.00368939	0.000298238	0.0195634	0.00368939	-0.364112	-1.63386	0.00368939	-0.272776	-0.495384	-0.0131597	0.00860324	-0.0115523
A2ML1_-_8975582.23-P1P2	0.00546468	0.0625478	0.150407	0.00546468	0.0713395	0.389551	0.00546468	0.0655169	0.142732	-0.00523833	0.0645018	0.112728
A2ML1_-_8975593.23-P1P2	-0.0105579	0.0109836	-0.00186441	-0.0105579	-0.117682	-0.574625	-0.0105579	-0.165807	-0.336129	-0.0421317	-0.220935	-0.511853
A2ML1_-_8975664.23-P1P2	0.0278601	-0.309675	-0.53242	0.0278601	-0.0566937	-0.0763863	0.0278601	-0.469829	-0.794712	0.023088	-0.127127	-0.156686
A2ML1_-_8975669.23-P1P2	-0.0177832	0.149081	0.254738	-0.0177832	0.130573	0.532576	-0.0177832	-0.115121	-0.26203	-0.112707	-0.113251	-0.51477
A2M_+_9268141.23-P1P2	0.0179371	0.0429432	0.148502	0.0179371	-0.141358	-0.523709	0.0179371	0.0381578	0.127348	-0.0251793	-0.107544	-0.257251
A2M_+_9268487.23-P1P2	0.0175938	-0.434953	-0.815932	0.0175938	-0.0658368	-0.176448	0.0175938	-0.276613	-0.46264	0.0145495	0.477805	0.922147
A2M_+_9268495.23-P1P2	-0.0615741	0.0310101	-0.115353	-0.0615741	0.0378065	-0.14284	-0.0615741	0.189878	0.182955	0.0154875	-0.154752	-0.22851
A2M_+_9268524.23-P1P2
A2M_-_9268044.23-P1P2	-0.0493053	0.0675661	-0.00465769	-0.0493053	0.0467964	-0.0322145	-0.0493053	0.15482	0.15258	-0.00984249	-0.112501	-0.22299
A2M_-_9268273.23-P1P2	0.0609834	0.049593	0.291731	0.0609834	-0.179836	-0.459328	0.0609834	-0.110616	-0.0274439	-0.00122561	-0.0618465	-0.106307
A2M_-_9268326.23-P1P2	-0.0721275	0.11649	0.0251388	-0.0721275	0.122615	0.18989	-0.0721275	0.00398667	-0.195188	-0.0591304	0.348018	0.477497
A2M_-_9268360.23-P1P2
A2M_-_9268387.23-P1P2	0.0630779	-0.240307	-0.286365	0.0630779	-0.00264404	0.371757	0.0630779	-0.259559	-0.300134	0.0651549	-0.116518	-0.0185784
A2M_-_9268427.23-P1P2	-0.0652082	-0.0583219	-0.306399	-0.0652082	-0.0664256	-0.645239	-0.0652082	0.279545	0.340307	0.0332872	-0.300552	-0.444087
A3GALT2_+_33786262.23-ENST00000442999.3	0.034663	-0.0545497	0.00240841	0.034663	-0.058603	-0.0469232	0.034663	-0.155855	-0.187667	0.0204031	0.192761	0.418969
A3GALT2_+_33786358.23-ENST00000442999.3	-0.0171714	-0.00995638	-0.0640235	-0.0171714	0.0402786	0.118521	-0.0171714	-0.0486228	-0.135841	-0.0641095	-0.0197612	-0.207112
A3GALT2_+_33786467.23-ENST00000442999.3	-0.0053961	0.16515	0.324489	-0.0053961	-0.266649	-1.23436	-0.0053961	0.129475	0.231228	0.0409467	-0.197739	-0.23501
A3GALT2_+_33786635.23-ENST00000442999.3	-0.0595228	-0.00840158	-0.188617	-0.0595228	-0.0805792	-0.678681	-0.0595228	-0.0876718	-0.330509	-0.0126136	0.0251724	0.0201989
A3GALT2_+_33786649.23-ENST00000442999.3	0.00267666	-0.270353	-0.5291	0.00267666	-0.02968	-0.0932316	0.00267666	-0.460148	-0.848904	-0.0375455	0.11017	0.104783
A3GALT2_+_33786659.23-ENST00000442999.3	0.110397	0.160578	0.664496	0.110397	-0.181843	-0.190471	0.110397	0.052472	0.419606	0.12575	-0.0421672	0.288055
A3GALT2_+_33786675.23-ENST00000442999.3	0.040483	-0.16323	-0.199129	0.040483	-0.1026	-0.217596	0.040483	-0.231825	-0.313112	0.046029	-0.245002	-0.306833
A3GALT2_+_33786682.23-ENST00000442999.3					0.641336	2.59628
A3GALT2_-_33786237.23-ENST00000442999.3	-0.0428207	-0.126269	-0.375857	-0.0428207	0.0306306	-0.0704615	-0.0428207	-0.1741	-0.444279	-0.112608	0.182497	0.024731
A3GALT2_-_33786280.23-ENST00000442999.3	0.0173364	0.0592074	0.179477	0.0173364	0.0542319	0.377272	0.0173364	-0.268852	-0.448857	-0.00663656	-0.0878383	-0.168973
A4GALT_+_43116425.23-P1P2	-0.0398902	-0.0720137	-0.257643	-0.0398902	-0.102216	-0.668219	-0.0398902	0.0488315	-0.0187133	-0.000962465	0.0650263	0.125756
A4GALT_+_43116792.23-P1P2	0.0671613	-0.379754	-0.555164	0.0671613	0.000662129	0.410028	0.0671613	-0.127254	-0.0408394	-0.0102548	0.290745	0.511063
A4GALT_-_43116413.23-P1P2	0.00347307	-0.386262	-0.760362	0.00347307	-0.0267059	-0.0749976	0.00347307	0.192722	0.375041	-0.014217	-0.0663024	-0.151109
A4GALT_-_43116431.23-P1P2	-0.0434881	-0.0303953	-0.184595	-0.0434881	-0.0404266	-0.40277	-0.0434881	0.251935	0.351006	-0.0565953	0.0539872	-0.0514358
A4GALT_-_43116434.23-P1P2	-0.00218459	-0.0837165	-0.167519	-0.00218459	-0.122534	-0.549927	-0.00218459	0.17762	0.330539	-0.0137546	-0.0742185	-0.164236
A4GALT_-_43116460.23-P1P2	0.0028645	0.0382676	0.0936186	0.0028645	0.0226595	0.149831	0.0028645	0.319892	0.611256	-0.0230586	0.0519191	0.039476
A4GALT_-_43116503.23-P1P2	-0.109914	-0.304231	-0.93696	-0.109914	0.414302	1.32589	-0.109914	0.240161	0.138251	-0.0530992	-0.150793	-0.41493
A4GALT_-_43116683.23-P1P2	-0.0647922	0.00654645	-0.174375	-0.0647922	0.0360705	-0.16898	-0.0647922	0.206955	0.20567	0.0260154	0.186789	0.423925
A4GALT_-_43116819.23-P1P2	-0.0823451	-0.129037	-0.500638	-0.0823451	-0.0466149	-0.650098	-0.0823451	0.382892	0.484488	-0.110087	0.124606	-0.0736986
A4GALT_-_43116823.23-P1P2
A4GNT_+_137850764.23-P1P2	-0.0407333	-0.0958132	-0.308164	-0.0407333	-0.129941	-0.801155	-0.0407333	-0.0794423	-0.261162	-0.0921363	-0.140927	-0.507152
A4GNT_+_137850968.23-P1P2	-0.126391		-0.467694	-0.126391		-0.252935	-0.126391		-0.249843	-0.0140112	-0.106394	-0.223625
A4GNT_+_137851024.23-P1P2	-0.0920258	-0.318397	-0.911567	-0.0920258	0.212717	0.494502	-0.0920258	-0.186574	-0.608899	0.058487	-0.347867	-0.459208
A4GNT_+_137851046.23-P1P2	-0.0341268	0.167122	0.241815	-0.0341268	-0.109786	-0.670778	-0.0341268	-0.0170884	-0.125516	-0.00422245	0.0214128	0.0370346
A4GNT_+_137851070.23-P1P2	0.02749	0.343908	0.784031	0.02749	0.0863081	0.582736	0.02749	-0.0736517	-0.0544427	0.0167563	-0.280115	-0.453497
A4GNT_+_137851178.23-P1P2	0.0851139	-0.493158	-0.729633	0.0851139	-0.0805185	0.135719	0.0851139	-0.373764	-0.450566	-0.030829	-0.301545	-0.626913
A4GNT_-_137850791.23-P1P2	-0.0234318	0.229292	0.399401	-0.0234318	0.31525	1.35469	-0.0234318	0.202251	0.315622	0.0267607	-0.113422	-0.121329
A4GNT_-_137850879.23-P1P2	-0.00858635	0.0166586	0.0155219	-0.00858635	-0.100558	-0.484351	-0.00858635	0.0729316	0.116263	0.0190882	0.21837	0.461947
A4GNT_-_137851117.23-P1P2	0.0398049	-0.0874391	-0.0483863	0.0398049	-0.167848	-0.523104	0.0398049	-0.435587	-0.696342	-0.0288424	0.0407928	0.00286106
A4GNT_-_137851121.23-P1P2	0.055272	-0.123246	-0.0739217	0.055272	0.093326	0.771563	0.055272	-0.282829	-0.36609	0.00584661	0.101007	0.210583
AAAS_+_53714942.23-P1P2	-0.0229469	-0.00350641	-0.0684392	-0.0229469	0.077541	0.258305	-0.0229469	0.224715	0.35905	-0.0282733	0.202121	0.298609
AAAS_+_53714983.23-P1P2	-0.0351087	0.149451	0.203231	-0.0351087	0.424143	1.79245	-0.0351087	0.00681649	-0.0836036	-0.015002	0.408589	0.712518
AAAS_+_53715016.23-P1P2	0.0369526	0.21976	0.562298	0.0369526	-0.126356	-0.34731	0.0369526	-0.0177323	0.0773636	0.0188829	-0.312383	-0.506325
AAAS_+_53715355.23-P1P2	0.0405091	-0.132051	-0.136196	0.0405091	0.0823471	0.637702	0.0405091	-0.455161	-0.730948	0.00632001	-0.287001	-0.495516
AAAS_-_53715347.23-P1P2	0.0572031	-0.453046	-0.732946	0.0572031	-0.0814075	-0.0254934	0.0572031	-0.138641	-0.0907395	0.0935151	-0.230143	-0.145676
AAAS_-_53715352.23-P1P2	0.031643	-0.076309	-0.0505647	0.031643	-0.0792193	-0.159247	0.031643	-0.148319	-0.182236	-0.0226785	0.0314827	0.00328859
AAAS_-_53715363.23-P1P2	-0.0492242	0.103594	0.0682163	-0.0492242	-0.0173432	-0.328325	-0.0492242	-0.00277056	-0.142072	-0.136761	0.0137361	-0.351151
AAAS_-_53715371.23-P1P2	-0.011428	0.167502	0.311039	-0.011428	0.284219	1.27877	-0.011428	0.0157615	0.00112656	-0.0365298	-0.0521214	-0.188248
AAAS_-_53715389.23-P1P2	0.0371034	-0.375259	-0.636753	0.0371034	0.0725444	0.573208	0.0371034	-0.272105	-0.398189	0.0278825	-0.132713	-0.153335
AAAS_-_53715438.23-P1P2	-0.0356703	-0.367069	-0.839723	-0.0356703	0.516238	2.21512	-0.0356703	0.0811358	0.0538511	0.00347038	-0.271723	-0.475704
AACS_+_125549974.23-P1P2	0.124621	-0.226056	-0.0720289	0.124621	-0.260788	-0.475434	0.124621	-0.115102	0.146878	0.0533621	-0.0647717	0.0424745
AACS_+_125549983.23-P1P2	-0.0732157	-0.285157	-0.78783	-0.0732157	0.182016	0.458424	-0.0732157	0.182159	0.135086	-0.031229	0.105699	0.114463
AACS_+_125549999.23-P1P2	0.0157827	-0.225706	-0.39957	0.0157827	0.100228	0.581202	0.0157827	-0.0835589	-0.106595	0.021793	0.202751	0.441106
AACS_+_125550002.23-P1P2	0.00248508	-0.238212	-0.464885	0.00248508	-0.168366	-0.735563	0.00248508	-0.0768658	-0.132251	-0.00650419	-0.189991	-0.354847
AACS_+_125550035.23-P1P2	0.0120788	-0.328532	-0.618028	0.0120788	-0.199856	-0.827163	0.0120788	-0.190015	-0.316431	-0.0191917	-0.302135	-0.595135
AACS_+_125550369.23-P1P2	-0.0145159	0.170657	0.308087	-0.0145159	-0.0827001	-0.435156	-0.0145159	0.222076	0.378319	-0.00829653	0.0709438	0.11584
AACS_+_125550406.23-P1P2	-0.0142608	-0.456067	-0.954566	-0.0142608	-0.088619	-0.461088	-0.0142608	-0.0502325	-0.130496	-0.0300676	0.00984411	-0.057025
AACS_-_125550169.23-P1P2	-0.0308722	0.115673	0.147915	-0.0308722	-0.205415	-1.09463	-0.0308722	-0.162835	-0.388893	-0.0406576	0.144515	0.158614
AACS_-_125550187.23-P1P2	-0.139728	-0.169549	-0.755369	-0.139728	-0.0351429	-0.920048	-0.139728	0.368992	0.293719	-0.020077	-0.0345769	-0.10981
AACS_-_125550379.23-P1P2	-0.0208351	-0.123921	-0.304815	-0.0208351	-0.15787	-0.818291	-0.0208351	0.0615907	0.059873	0.0294925	0.0273844	0.143108
AADACL2_+_151451732.23-P1P2	0.060181	-0.238871	-0.292208	0.060181	0.0507732	0.60244	0.060181	-0.0135017	0.151974	0.0410082	-0.170668	-0.185479
AADACL2_+_151451892.23-P1P2	-0.131745		-0.517141	-0.131745		-0.475434	-0.131745		-0.279969	-0.0299986	0.123077	0.149622
AADACL2_+_151451926.23-P1P2	-0.0396567	-0.0724678	-0.257855	-0.0396567	-0.134673	-0.816977	-0.0396567	0.0275501	-0.057865	0.013082	0.0228178	0.0884511
AADACL2_+_151451935.23-P1P2
AADACL2_+_151452057.23-P1P2	0.037353	0.0849376	0.291716	0.037353	-0.303401	-1.16367	0.037353	-0.177219	-0.219919	-0.00673358	-0.0570024	-0.113025
AADACL2_+_151452121.23-P1P2	0.0323902	-0.319425	-0.538413	0.0323902	-0.192446	-0.678575	0.0323902	-0.147757	-0.179039	0.0167753	-0.33464	-0.552854
AADACL2_-_151451828.23-P1P2	0.0834504	0.335227	0.935305	0.0834504	-0.30369	-0.905538	0.0834504	0.0510127	0.339505	-0.0578995	-0.00555298	-0.163674
AADACL2_-_151451931.23-P1P2	-0.0748061	-0.246086	-0.713863	-0.0748061	0.0627948	-0.101778	-0.0748061	0.276139	0.306376	0.0120549	0.0811053	0.191824
AADACL2_-_151451961.23-P1P2		0.23445	0.343875					0.399773	0.622467
AADACL2_-_151452019.23-P1P2	0.00714385	-0.179728	-0.332936	0.00714385	-0.0527904	-0.174944	0.00714385	-0.307502	-0.550445	0.0410469	-0.142912	-0.134764
AADACL3_+_12776115.23-P1P2	-0.0111583	0.121266	0.218645	-0.0111583	-0.0156185	-0.106088	-0.0111583	0.218735	0.381707	0.0278425	-0.0242366	0.0443319
AADACL3_+_12776121.23-P1P2	-0.0140205	0.265035	0.499839	-0.0140205	0.0471375	0.167971	-0.0140205	-0.0819697	-0.189193	0.0318706	0.192634	0.451112
AADACL3_+_12776133.23-P1P2	0.00288699	0.178167	0.375712	0.00288699	0.214914	1.0389	0.00288699	-0.0320735	-0.0472814	-0.0658131	-0.0045974	-0.184274
AADACL3_+_12776213.23-P1P2	0.0618899	0.0294792	0.253918	0.0618899	-0.128099	-0.215003	0.0618899	-0.182718	-0.15976	0.0777271	-0.310061	-0.33596
AADACL3_+_12776313.23-P1P2	-0.0297339	-0.165218	-0.414904	-0.0297339	-0.130762	-0.743042	-0.0297339	-0.332831	-0.703725	-0.194585		-0.563831
AADACL3_+_12776369.23-P1P2	-0.136278	0.602022	0.81046	-0.136278	0.357078	0.912913	-0.136278	0.0392365	-0.313416	0.0424684	-0.0479893	0.0423173
AADACL3_+_12776495.23-P1P2	-0.0404008	0.148267	0.184884	-0.0404008	0.42268	1.7559	-0.0404008	-0.143682	-0.380413	0.0049677	0.0619024	0.136803
AADACL3_-_12776129.23-P1P2
AADACL3_-_12776233.23-P1P2	0.0151498	-0.0268738	-0.000649434	0.0151498	-0.0705507	-0.212001	0.0151498	0.0285523	0.101371	0.0673434	-0.486993	-0.687865
AADACL3_-_12776507.23-P1P2	-0.0345598	-0.100931	-0.299862	-0.0345598	0.195083	0.736427	-0.0345598	-0.156914	-0.388402	0.0106228	-0.0954429	-0.13411
AADACL4_+_12704492.23-P1P2	0.0140522	0.222406	0.498567	0.0140522	0.236863	1.20323	0.0140522	0.0403382	0.120274	-0.0127201	0.422815	0.744898
AADACL4_+_12704556.23-P1P2	-0.0584749	0.0522364	-0.0632159	-0.0584749	-0.0902364	-0.717435	-0.0584749	0.149612	0.116508	-0.0289873	0.120664	0.148077
AADACL4_+_12704573.23-P1P2	-0.0191746	0.22929	0.412237	-0.0191746	-0.0204652	-0.173619	-0.0191746	-0.0168212	-0.0820846	0.0106961	0.0702303	0.16816
AADACL4_+_12704601.23-P1P2	-0.0266276	0.120182	0.169804	-0.0266276	-0.247271	-1.26426	-0.0266276	0.0352831	-0.00598553	0.0103954	-0.505536	-0.882452
AADACL4_+_12704653.23-P1P2	0.0277976	-0.176469	-0.264075	0.0277976	0.53839	2.67479	0.0277976	-0.139365	-0.176524	0.0917099	-0.0439669	0.188672
AADACL4_+_12704686.23-P1P2	-0.0303404	0.0360658	-0.0109631	-0.0303404	-0.185415	-0.999157	-0.0303404	-0.180743	-0.420877	0.0124696	-0.104543	-0.145488
AADACL4_+_12704714.23-P1P2	0.0746712	-0.127395	-0.0237801	0.0746712	0.173465	1.2513	0.0746712	-0.322582	-0.384777	0.0739337	0.20314	0.589022
AADACL4_+_12704720.23-P1P2	0.0345493	0.274088	0.664571	0.0345493	-0.0919818	-0.201898	0.0345493	-0.134095	-0.147277	-0.00175608	0.220401	0.406803
AADACL4_+_12704750.23-P1P2	-0.0990305	-0.0375387	-0.366507	-0.0990305	0.342782	1.05646	-0.0990305	-0.211865	-0.676336	-0.0408154	-0.0747428	-0.241592
AADACL4_-_12704768.23-P1P2	0.0419317	-0.406712	-0.685599	0.0419317	0.156348	0.987871	0.0419317	0.217992	0.532749	0.0742228	0.218521	0.617881
AADAC_+_151532013.23-P1P2	-0.0366777	-0.415366	-0.940124	-0.0366777	-0.176007	-0.991327	-0.0366777	0.0539671	0.000120168	0.064349	-0.0542393	0.0926962
AADAC_+_151532125.23-P1P2	-0.0192981	0.137853	0.227535	-0.0192981	0.129995	0.52138	-0.0192981	0.179572	0.285055	0.010961	0.0680072	0.164854
AADAC_+_151532371.23-P1P2	0.0197909	-0.189879	-0.315258	0.0197909	0.000107193	0.140828	0.0197909	0.0240753	0.10632	0.00205658	-0.180873	-0.314054
AADAC_-_151531905.23-P1P2	-0.0497927	0.169713	0.199792	-0.0497927	0.0203012	-0.157465	-0.0497927	0.00682669	-0.125746	0.0185732	0.0970926	0.239375
AADAC_-_151531939.23-P1P2	-0.073023	0.450502	0.695777	-0.073023	0.00916904	-0.339695	-0.073023	0.303692	0.363053	0.0108729	-0.293052	-0.493693
AADAC_-_151531954.23-P1P2	-0.0476523	0.307032	0.48307	-0.0476523	-0.0509369	-0.474806	-0.0476523	-0.124473	-0.36529	0.021832	0.269369	0.562677
AADAC_-_151531985.23-P1P2	0.0484981	0.423457	1.00775	0.0484981	-0.281893	-1.00149	0.0484981	0.170468	0.462675	0.0162621	-0.0838277	-0.0970115
AADAC_-_151532317.23-P1P2	0.0323958	-0.117023	-0.13037	0.0323958	-0.155525	-0.507828	0.0323958	-0.164889	-0.211082	-0.0104036	-0.458327	-0.8551
AADAC_-_151532366.23-P1P2	-0.0679597	-0.120871	-0.440791	-0.0679597	-0.0276066	-0.481237	-0.0679597	-0.0367759	-0.259497	0.0394862	-0.488665	-0.769561
AADAC_-_151532397.23-P1P2	0.0350236	0.134146	0.383891	0.0350236	-0.280888	-1.07269	0.0350236	0.102231	0.296302	0.0130975	-0.13687	-0.202655
AADAT_+_171010904.23-P1P2	0.0227793	-0.0606744	-0.0457787	0.0227793	-0.0304831	0.0162068	0.0227793	0.0141757	0.0963757	0.0369745	-0.0390955	0.0430225
AADAT_+_171010929.23-P1P2	0.0690577	0.127807	0.473756	0.0690577	-0.0937563	-0.0158659	0.0690577	0.0976396	0.385429	-0.0266006	0.2387	0.370024
AADAT_+_171011005.23-P1P2	-0.0293182	-0.360205	-0.806728	-0.0293182	0.246742	1.00479	-0.0293182	0.303757	0.48866	0.0234195	-0.0241493	0.0320038
AADAT_+_171011279.23-P1P2	-0.0116955	-0.266518	-0.564715	-0.0116955	0.164064	0.7217	-0.0116955	-0.123378	-0.260002	-0.0762255	0.00329658	-0.199278
AADAT_+_171011325.23-P1P2	0.0302436	0.0784745	0.257245	0.0302436	0.377537	1.94481	0.0302436	-0.358746	-0.580008	0.0123201	-0.177225	-0.278427
AADAT_+_171011392.23-P1P2	0.130039	-0.323121	-0.251361	0.130039	-0.125637	0.179971	0.130039	0.160647	0.67842	0.0764217	-0.17857	-0.0999049
AADAT_-_171011321.23-P1P2	0.0193023	-0.478425	-0.898415	0.0193023	0.157276	0.864791	0.0193023	-0.0363843	-0.0082159	0.010662	-0.243843	-0.404569
AADAT_-_171011333.23-P1P2	0.0104599	0.0847785	0.210288	0.0104599	-0.0491397	-0.1394	0.0104599	-0.117829	-0.186005	0.0291105	0.375347	0.77645
AADAT_-_171011368.23-P1P2	0.00409168	0.168198	0.359249	0.00409168	0.401372	1.90782	0.00409168	-0.296028	-0.537736	0.0247902	0.108231	0.277235
AADAT_-_171011381.23-P1P2	0.0426604	0.177069	0.49345	0.0426604	-0.0491948	0.0415932	0.0426604	-0.383528	-0.59073	0.0491988	0.0205835	0.186344
AAED1_+_99417117.23-P1P2	0.0485458	0.0838342	0.323248	0.0485458	-0.303195	-1.09971	0.0485458	0.000395294	0.144571	0.0173481	-0.154953	-0.223625
AAED1_+_99417228.23-P1P2	0.040718	-0.141096	-0.1538	0.040718	-0.249144	-0.893859	0.040718	-0.272844	-0.389193	-0.035599	-0.364484	-0.755133
AAED1_+_99417233.23-P1P2	-0.162346		-0.274406	-0.162346		-0.0224083	-0.162346		-0.336129	-0.155505		-0.211366
AAED1_+_99417483.23-P1P2	-0.100194	-0.221885	-0.741644	-0.100194	0.164565	0.225882	-0.100194	0.0954273	-0.104668	-0.00913577	-0.114348	-0.224361
AAED1_+_99417525.23-P1P2	-0.0948146	-0.348834	-0.981338	-0.0948146	0.171518	0.288309	-0.0948146	-0.0714944	-0.401568	0.0367559	0.106892	0.308577
AAED1_+_99417589.23-P1P2	0.134029	-0.0940805	0.222396	0.134029	-0.244439	-0.346881	0.134029	-0.107505	0.188106	0.00891587	-0.124345	-0.191626
AAED1_-_99417150.23-P1P2	0.0794595	-0.192643	-0.140875	0.0794595	-0.306692	-0.941881	0.0794595	-0.419631	-0.552628	0.00126139	0.106837	0.208266
AAED1_-_99417451.23-P1P2	-0.11303	0.127009	-0.0770155	-0.11303	-0.0729183	-0.944436	-0.11303	0.142712	-0.0530441	-0.0384744	0.287781	0.425987
AAED1_-_99417574.23-P1P2	-0.0311822	0.35795	0.635389	-0.0311822	0.0120276	-0.0909673	-0.0311822	0.145155	0.186531	-0.0297258	0.217431	0.322422
AAED1_-_99417581.23-P1P2	0.030983	0.123331	0.349901	0.030983	0.0798334	0.57246	0.030983	0.191642	0.452006	0.0190772	-0.121373	-0.157518
AAGAB_+_67546560.23-P1P2	-0.00128002	0.27238	0.553071	-0.00128002	0.174435	0.828276	-0.00128002	0.184317	0.345666	0.0262781	0.190986	0.432318
AAGAB_+_67546965.23-P1P2								0.405337	0.665332
AAGAB_+_67546984.23-P1P2	-0.00099316	-0.126269	-0.249708	-0.00099316	0.347309	1.62922	-0.00099316	0.20205	0.379673	-0.00128801	0.147293	0.27483
AAGAB_-_67546617.23-P1P2	0.00821132	-0.0197581	-0.00723073	0.00821132	0.0665031	0.382649	0.00821132	0.28144	0.554656	-0.0523944	0.198817	0.224486
AAGAB_-_67546714.23-P1P2	0.0310297	-0.428762	-0.76293	0.0310297	-0.0586979	-0.0678123	0.0310297	0.18344	0.436794	0.0637759	-0.315236	-0.384782
AAGAB_-_67546743.23-P1P2	0.010646	0.195408	0.433869	0.010646	-0.0882687	-0.319275	0.010646	-0.0240775	-0.0100416	0.00413688	-0.00350272	0.015208
AAGAB_-_67546780.23-P1P2	0.0205955	-0.197445	-0.328082	0.0205955	0.235404	1.23331	0.0205955	0.396431	0.805387	0.0885412	-0.26106	-0.216087
AAGAB_-_67546928.23-P1P2	0.0954683	-0.0767338	0.141071	0.0954683	-0.115875	0.03052	0.0954683	-0.349564	-0.375553	-0.103239		-0.215874
AAGAB_-_67546952.23-P1P2	-0.00833283	0.199054	0.38398	-0.00833283	0.349616	1.59858	-0.00833283	0.00319087	-0.0135088	-0.0237416	0.29285	0.476824
AAGAB_-_67546997.23-P1P2	-0.210554		-0.622857	-0.210554		-0.672735	-0.210554		-0.474544	-0.0404368	0.434361	0.687699
AAK1_+_69870290.23-P1P2	-0.0273322	0.148128	0.224018	-0.0273322	-0.0681324	-0.439938	-0.0273322	0.22106	0.33962	-0.0219602	-0.368641	-0.724207
AAK1_+_69870701.23-P1P2	0.0403274	0.136672	0.404979	0.0403274	0.0830748	0.640045	0.0403274	-0.0948181	-0.0571906	-0.00536543	-0.461843	-0.847286
AAK1_+_69870743.23-P1P2	0.0142876	0.101692	0.255928	0.0142876	0.153605	0.819589	0.0142876	0.159057	0.343098	-0.067884	0.0956825	-0.00728563
AAK1_-_69870339.23-P1P2	-0.00569859	-0.139173	-0.289912	-0.00569859	0.19265	0.887627	-0.00569859	0.0678121	0.114975	0.0185094	0.0207648	0.100031
AAK1_-_69870541.23-P1P2	-0.000580866	-0.00529768	-0.00459618	-0.000580866	-0.11648	-0.512909	-0.000580866	0.265814	0.500172	0.00223672	0.205316	0.390571
AAK1_-_69870640.23-P1P2	-0.0239043	-0.0111524	-0.0867403	-0.0239043	0.403319	1.75923	-0.0239043	0.0123879	-0.0410081	-0.0406018	0.174237	0.212962
AAK1_-_69870719.23-P1P2	0.0450426	0.15893	0.464068	0.0450426	-0.110044	-0.226348	0.0450426	-0.00972611	0.115573	-0.084687	0.161695	0.0656323
AAK1_-_69870759.23-P1P2	0.0400836	-0.0571026	0.01361	0.0400836	-0.091896	-0.170351	0.0400836	0.181702	0.459538	-0.0271157	-0.141632	-0.32487
AAK1_-_69870791.23-P1P2	0.0292001	-0.159747	-0.226136	0.0292001	0.193201	1.08661	0.0292001	0.0838302	0.24515	0.0157082	-0.014305	0.0281816
AAK1_-_69870794.23-P1P2	0.0366306	-0.190589	-0.265901	0.0366306	0.166982	1.0072	0.0366306	-0.305482	-0.462001	-0.0413004	0.200083	0.258113
AAMDC_+_77532426.23-P1P2	0.0403094	0.264458	0.66253	0.0403094	-0.20606	-0.696948	0.0403094	0.00954805	0.138049	0.0350951	-0.00402634	0.101656
AAMDC_-_77532187.23-P1P2	-0.0372055	0.237695	0.3748	-0.0372055	0.661506	2.87816	-0.0372055	0.0641989	0.0177506	0.0200979	0.154563	0.348463
AAMDC_-_77532195.23-P1P2	-0.0832239	0.541972	0.849409	-0.0832239	0.241209	0.675785	-0.0832239	-0.191106	-0.592107	-0.0278181	0.305081	0.487614
AAMDC_-_77532222.23-P1P2								0.435885	0.83244	0.135432	-0.181108
AAMDC_-_77532236.23-P1P2	0.0956397	-0.434953	-0.580552	0.0956397	-0.140025	-0.0801787	0.0956397	-0.251136	-0.190881	0.0593146	-0.177314	-0.145912
AAMDC_-_77532439.23-P1P2	0.0665494	-0.497223	-0.793817	0.0665494	0.218353	1.41314	0.0665494	0.38453	0.91506	0.0415212	-0.0268796	0.0781313
AAMDC_-_77532634.23-P1P2	-0.146814		-0.660528	-0.146814		-0.743042	-0.146814		-0.451199	0.0239771	-0.117345	-0.136341
AAMDC_-_77532649.23-P1P2	-0.0174662	0.297525	0.554943	-0.0174662	0.0230094	0.0370129	-0.0174662	0.0251369	0.00133292	0.0260885	-0.125778	-0.145756
AAMDC_-_77532686.23-P1P2	0.043908	0.176719	0.496508	0.043908	-0.203156	-0.663262	0.043908	0.24994	0.598206	0.0105878	0.116923	0.252987
AAMDC_-_77532705.23-P1P2	-0.0255103	0.138661	0.210427	-0.0255103	0.00195028	-0.105637	-0.0255103	-0.159098	-0.366506	0.0138375	-0.0291165	-0.00410498
AAMP_+_219134841.23-P1P2	-0.237461	0.222457	-0.259872	-0.237461	0.260303	-0.104086	-0.237461	0.086015	-0.516402	-0.181135	0.0250729	-0.455758
AAMP_+_219134851.23-P1P2	-0.195006	-0.158212	-0.899229	-0.195006	0.427828	0.909476	-0.195006	0.0835027	-0.399207	-0.100912	-0.100721	-0.458622
AAMP_-_219134310.23-P1P2	0.0161723	-0.52324	-0.998198	0.0161723	-0.263785	-1.09971	0.0161723	0.200606	0.426257	-0.0891408	0.0307262	-0.18573
AAMP_-_219134415.23-P1P2	-0.102929	0.387099	0.477769	-0.102929	0.373967	1.17871	-0.102929	0.0171979	-0.258904	-0.0943796	0.318198	0.32361
AAMP_-_219134418.23-P1P2	0.00207634	-0.366665	-0.725068	0.00207634	-0.0626672	-0.249136	0.00207634	-0.0356176	-0.0562407	0.00146409	0.219399	0.414066
AAMP_-_219134424.23-P1P2	-0.00566904	-0.0753242	-0.161109	-0.00566904	0.150965	0.695051	-0.00566904	0.198285	0.359202	0.037401	-0.109208	-0.0836049
AAMP_-_219134443.23-P1P2	0.0564744	0.0300562	0.238748	0.0564744	-0.176848	-0.470889	0.0564744	0.182825	0.5087	0.026229	-0.371452	-0.593281
AAMP_-_219134449.23-P1P2	0.00618404	-0.12078	-0.216997	0.00618404	-0.0501428	-0.168105	0.00618404	-0.0894884	-0.14525	0.039111	0.216206	0.51453
AAMP_-_219134453.23-P1P2	0.0585418	-0.334711	-0.490356	0.0585418	-0.033649	0.202866	0.0585418	-0.0703609	0.0408715	0.0573311	-0.274528	-0.328758
AAMP_-_219134469.23-P1P2	-0.0163272	0.0333251	0.0257743	-0.0163272	0.125076	0.515358	-0.0163272	0.0318391	0.0171446	-0.00575093	-0.0580749	-0.112206
AANAT_+_74463710.23-P1P2	0.0454101	0.173905	0.495365	0.0454101	0.378453	2.03441	0.0454101	-0.433317	-0.676	0.040376	-0.369348	-0.549506
AANAT_+_74463718.23-P1P2	-0.0253731	0.187266	0.308825	-0.0253731	-0.0675372	-0.426158	-0.0253731	-0.00701881	-0.0815395	-0.025329	0.42379	0.711078
AANAT_+_74463735.23-P1P2	-0.00629408	-0.07056	-0.15339	-0.00629408	0.183467	0.841817	-0.00629408	0.147078	0.261589	0.034555	-0.0323907	0.0484158
AANAT_+_74463793.23-P1P2	-0.0225374	0.0237492	-0.0122591	-0.0225374	0.329371	1.42501	-0.0225374	-0.196566	-0.42808	-0.0232721	-0.182103	-0.387807
AANAT_+_74464038.23-P1P2	-0.0562048	-0.479532	-1.12837	-0.0562048	-0.10296	-0.763487	-0.0562048	0.15917	0.140911	-0.177458	0.20513	-0.117089
AANAT_+_74464088.23-P1P2	0.0268063	-0.313111	-0.542524	0.0268063	0.281305	1.48051	0.0268063	-0.359551	-0.591383	0.0353257	0.174813	0.428375
AANAT_+_74464143.23-P1P2	0.00554832	0.204045	0.435907	0.00554832	0.319942	1.5395	0.00554832	0.0508636	0.115553	-0.00648365	-0.00328802	-0.0143849
AANAT_-_74463789.23-P1P2	0.0571277	0.115531	0.413028	0.0571277	-0.163904	-0.407363	0.0571277	-0.639582	-1.02832	-0.0127164	-0.20992	-0.408723
AANAT_-_74464175.23-P1P2	0.0154693	0.511966	1.08657	0.0154693	0.467878	2.27937	0.0154693	0.0360005	0.116226	0.0106073	0.342098	0.66359
AANAT_-_74464185.23-P1P2	0.0265638	-0.0040914	0.0797015	0.0265638	-0.137068	-0.455314	0.0265638	0.110742	0.287938	0.0517926	-0.28144	-0.356996
AAR2_+_34824386.23-P1P2	0.0366474	-0.261015	-0.407824	0.0366474	-0.10957	-0.271411	0.0366474	-0.058902	-0.000550048	0.0246914	0.0659834	0.199929
AAR2_+_34824405.23-P1P2	-0.0934013	0.102871	-0.0664758	-0.0934013	-0.0927896	-0.925831	-0.0934013	0.00786897	-0.249005	-0.160597		-0.269466
AAR2_+_34824485.23-P1P2	-0.105021	0.093233	-0.120948	-0.105021	-0.0715342	-0.892952	-0.105021	-0.175848	-0.62614	-0.112506	0.12767	-0.0749428
AAR2_+_34824488.23-P1P2	-0.179289	0.487871	0.450622	-0.179289		0.247057	-0.179289	0.305361	0.0610655	-0.108822		-0.399649
AAR2_+_34824655.23-P1P2	0.00601596	-0.0736264	-0.122446	0.00601596	0.184304	0.914974	0.00601596	-0.208452	-0.368338	0.0130113	-0.237552	-0.386466
AAR2_+_34824681.23-P1P2	-0.110071	0.0170715	-0.289715	-0.110071	-0.0423286	-0.78634	-0.110071	0.124211	-0.0791661	-0.0506682	-0.0882614	-0.294056
AAR2_-_34824417.23-P1P2	-0.152771	0.0890592	-0.273373	-0.152771	-0.0417876	-1.02418	-0.152771	-0.146797	-0.708881	-0.0741668	0.300171	0.347809
AAR2_-_34824425.23-P1P2	-0.032179	-0.345286	-0.785281	-0.032179	-0.126168	-0.735563	-0.032179	-0.148643	-0.36609	-0.169267		-0.435579
AAR2_-_34824434.23-P1P2	-0.192844	-0.206405	-0.989861	-0.192844	-0.065133	-1.35769	-0.192844	0.425263	0.246506	-0.295031	0.588551	0.250043
AAR2_-_34824937.23-P1P2	-0.00719271	0.259603	0.509481	-0.00719271	0.114577	0.518228	-0.00719271	0.0997626	0.170471	-0.0655936	0.171949	0.138234
AARD_+_117950477.23-P1P2	0.0404743	0.111374	0.354424	0.0404743	-0.0895061	-0.157101	0.0404743	-0.0222688	0.0789864	0.0130875	-0.202833	-0.32295
AARD_+_117950489.23-P1P2	-0.0486444	0.685004	1.24204	-0.0486444	0.0944681	0.191928	-0.0486444	0.18975	0.219839	-0.0728739	0.367017	0.473336
AARD_+_117950882.23-P1P2	0.0335533	-0.0333408	0.0418171	0.0335533	0.34023	1.79094	0.0335533	0.0070975	0.114065	0.000258	-0.196385	-0.347415
AARD_+_117950890.23-P1P2		0.610063	1.21491					0.364214	0.664296	0.189528	-0.391594
AARD_+_117950901.23-P1P2	-0.0298607	0.0487664	0.0160869	-0.0298607	-0.0288473	-0.272525	-0.0298607	-0.164732	-0.389539	-0.0177124	-0.0656536	-0.159794
AARD_+_117950911.23-P1P2	-0.0587743	-0.00806728	-0.185686	-0.0587743	-0.107909	-0.800833	-0.0587743	0.176052	0.165124	-0.0627179	0.344557	0.461059
AARD_-_117950494.23-P1P2	-0.0326042	0.0549222	0.0202221	-0.0326042	-0.186646	-1.01759	-0.0326042	0.0430763	-0.00856314	-0.0124683	0.220564	0.376855
AARD_-_117950667.23-P1P2	0.00795984	0.0207945	0.0737614	0.00795984	0.230963	1.14166	0.00795984	0.0277725	0.0792683	-0.0126524	-0.38688	-0.731183
AARD_-_117950692.23-P1P2	0.0786911	0.193955	0.636158	0.0786911	-0.195685	-0.432938	0.0786911	0.115	0.445574	0.011913	-0.018672	0.00950461
AARD_-_117950728.23-P1P2	0.0411599	0.0402566	0.213124	0.0411599	-0.0328271	0.108828	0.0411599	-0.20697	-0.264659	0.0825793	-0.346835	-0.389309
AARS2_+_44280645.23-P1P2	-0.0359077	-0.103556	-0.309219	-0.0359077	0.318761	1.3007	-0.0359077	-0.37903	-0.807899	-0.0228436	0.416057	0.703996
AARS2_+_44280650.23-P1P2	-0.00761084	0.0396987	0.0649109	-0.00761084	-0.0379244	-0.189257	-0.00761084	0.0273611	0.0337919	-0.00809312	0.112011	0.191289
AARS2_+_44280670.23-P1P2	-0.0225246	0.117726	0.177228	-0.0225246	-0.0387775	-0.277147	-0.0225246	-0.0129799	-0.0845155	0.0199792	-0.353443	-0.578091
AARS2_+_44281006.23-P1P2	-0.080176	-0.197715	-0.632545	-0.080176	0.0366407	-0.252935	-0.080176	0.107652	-0.0243167	-0.0841481	0.152182	0.0498096
AARS2_+_44281027.23-P1P2	-0.214081	0.0512503	-0.534498	-0.214081	0.123896	-0.603197	-0.214081	0.211108	-0.215199	-0.18688	-0.185058	-0.8551
AARS2_+_44281044.23-P1P2	-0.161811	-0.226405	-0.936588	-0.161811	-0.0690437	-1.2011	-0.161811	-0.000716197	-0.461489	-0.195529	0.103112	-0.354111
AARS2_+_44281056.23-P1P2	-0.0259587	0.119738	0.170928	-0.0259587	-0.159857	-0.856318	-0.0259587	0.329315	0.546132	-0.0715881	-0.226398	-0.604975
AARS2_-_44280878.23-P1P2	-0.0126262	0.284673	0.543632	-0.0126262	-0.0660927	-0.347731	-0.0126262	0.10734	0.16905	-0.0575464	0.632349	1.00037
AARS2_-_44281001.23-P1P2										0.187549	-0.236226
AARS2_-_44281016.23-P1P2	-0.0147578	0.104235	0.173456	-0.0147578	-0.117806	-0.598837	-0.0147578	0.0468961	0.0498254	-0.021814	-0.47735	-0.921997
AARSD1_+_41116203.23-P1	-0.00975348	0.287021	0.55703	-0.00975348	0.269579	1.2205	-0.00975348	-0.102997	-0.216288	-0.000891163	0.181143	0.337668
AARSD1_+_41116343.23-P1	0.0486159	-0.205991	-0.260803	0.0486159	-0.135349	-0.323241	0.0486159	-0.0507728	0.0490256	0.0193845	-0.184683	-0.27208
AARSD1_+_41116412.23-P1	0.100802	-0.022016	0.267462	0.100802	-0.0140059	0.531559	0.100802	-0.233327	-0.142736	-0.00182325	0.00306754	0.0103602
AARSD1_+_41116417.23-P1	-0.0633772	-0.260276	-0.708	-0.0633772	0.0737626	0.0132641	-0.0633772	0.103587	0.0163088	-0.0686719	-0.114348	-0.392446
AARSD1_+_41132061.23-P2	0.00846621	-0.0454058	-0.0581655	0.00846621	0.181838	0.917365	0.00846621	0.0424117	0.108115	-0.00724609	0.180431	0.318428
AARSD1_+_41132078.23-P2	-0.0979482	0.375436	0.469278	-0.0979482	-0.101366	-0.99108	-0.0979482	0.140049	-0.0147233	-0.102695	0.325609	0.313645
AARSD1_-_41116054.23-P1	-0.0217071	0.104192	0.15241	-0.0217071	0.150228	0.601371	-0.0217071	-0.0500104	-0.15146	-0.00663023	-0.283284	-0.5253
AARSD1_-_41116243.23-P1	0.0299207	0.1509	0.402275	0.0299207	0.208142	1.15975	0.0299207	-0.335339	-0.537135	0.0554243	-0.330529	-0.436243
AARSD1_-_41116425.23-P1	0.00380363	-0.313442	-0.612565	0.00380363	0.103453	0.528686	0.00380363	-0.0548879	-0.0873402	-0.0183169	0.284509	0.476932
AARSD1_-_41116465.23-P1	-0.0158897	-0.0463517	-0.133528	-0.0158897	0.288482	1.27337	-0.0158897	-0.0450514	-0.125478	-0.0461092	0.214154	0.270192
AARSD1_-_41116499.23-P1	-0.158539	0.00698972	-0.456213	-0.158539	-0.0849998	-1.25645	-0.158539	0.221216	-0.0368099	-0.00112959	-0.158281	-0.281859
AARSD1_-_41116508.23-P1	-0.00972539	-0.292794	-0.611744	-0.00972539	0.071735	0.305879	-0.00972539	0.114863	0.191455	-0.0606796	0.294838	0.376163
AARSD1_-_41131671.23-P2	-0.0368325	-0.24183	-0.590757	-0.0368325	-0.0728626	-0.515284	-0.0368325	0.146554	0.172926	-0.0232096	0.101027	0.128585
AARSD1_-_41131701.23-P2	0.00934546	-0.148274	-0.262888	0.00934546	0.223611	1.11546	0.00934546	-0.319412	-0.566409	-0.0261207	-0.0011182	-0.0658691
AARSD1_-_41131712.23-P2	-0.00496792	-0.0110485	-0.0294203	-0.00496792	0.262213	1.21338	-0.00496792	-0.00257802	-0.0146423	-0.00589169	0.200928	0.359622
AARSD1_-_41131716.23-P2	-0.0209746	0.256323	0.461302	-0.0209746	0.113435	0.43537	-0.0209746	-0.0855177	-0.215799	-0.00030942	0.221093	0.412147
AARSD1_-_41132004.23-P2	-0.0426944	0.294612	0.472986	-0.0426944	0.0300542	-0.0724155	-0.0426944	-0.259181	-0.603122	-0.0196576	-0.0357115	-0.110694
AARSD1_-_41132022.23-P2	0.0367901	-0.292142	-0.470141	0.0367901	0.266992	1.47052	0.0367901	-0.0791999	-0.038122	0.0175833	-0.0631802	-0.0556361
AARSD1_-_41132037.23-P2	0.00432412	-0.0320126	-0.0436581	0.00432412	-0.13276	-0.560574	0.00432412	0.0653161	0.139082	0.00426071	0.608821	1.13197
AARSD1_-_41132088.23-P2	-0.0060562	-0.0725974	-0.15678	-0.0060562	0.317226	1.46162	-0.0060562	0.0841686	0.144554	-0.00510573	0.14278	0.255822
AARS_+_70323296.23-P1P2	-0.131065		-0.329642	-0.131065		-0.157246	-0.131065	0.134237	-0.120685	-0.0903203	0.386094	0.458862
AARS_+_70323318.23-P1P2	-0.248838	0.301015	-0.135819	-0.248838	0.370005	0.339116	-0.248838	0.314315	-0.121871	-0.280492	0.412272	-0.0303092
AARS_+_70323322.23-P1P2	-0.130919	-0.174355	-0.738489	-0.130919	0.0556491	-0.450661	-0.130919	-0.153878	-0.659388	-0.163436	0.237672	-0.0181716
AARS_+_70323353.23-P1P2	-0.377662		-0.923781	-0.377662	0.470825	0.080169	-0.377662		-0.761031	-0.184991	0.176761	-0.190081
AARS_+_70323362.23-P1P2	-0.165191	-0.124675	-0.7417	-0.165191	0.169706	-0.116195	-0.165191	0.213308	-0.0707078	-0.242094	-0.103424	-0.862141
AARS_+_70323368.23-P1P2	-0.0182075	0.161635	0.278766	-0.0182075	-0.0217939	-0.174319	-0.0182075	0.0124227	-0.0245865	0.0133133	0.0960164	0.222563
AARS_+_70323376.23-P1P2	-0.301071		-0.817322	-0.301071		-0.982744	-0.301071		-0.882157	-0.363507		-0.798608
AARS_-_70322952.23-P1P2	0.0132121	-0.452816	-0.865157	0.0132121	0.439493	2.13541	0.0132121	0.172709	0.365556	0.0192671	0.166503	0.367887
AARS_-_70323314.23-P1P2	-0.129213		-0.364455	-0.129213		-0.36271	-0.129213		-0.54444	-0.140489		-0.347415
AARS_-_70323332.23-P1P2	-0.102067	-0.0734749	-0.44811	-0.102067	-0.0315506	-0.691454	-0.102067	-0.122236	-0.517341	-0.284923	0.294983	-0.256666
AASDHPPT_+_105948405.23-P1P2	-0.0343725	-0.399448	-0.901082	-0.0343725	-0.222213	-1.192	-0.0343725	-0.285937	-0.629295	-0.0977813	-0.283709	-0.783417
AASDHPPT_+_105948450.23-P1P2	0.010683	-0.0978695	-0.157242	0.010683	0.01975	0.180386	0.010683	0.239764	0.483769	-0.00699929	-0.022636	-0.0511167
AASDHPPT_+_105948470.23-P1P2	-0.0489869	-0.307917	-0.76064	-0.0489869	0.0279038	-0.117777	-0.0489869	0.200067	0.238162	0.021376	-0.499571	-0.840576
AASDHPPT_+_105948804.23-P1P2	-0.000314855	-0.285612	-0.568884	-0.000314855	-0.0225179	-0.0769543	-0.000314855	-0.03298	-0.0581708	-0.0237886	-0.371998	-0.73549
AASDHPPT_+_105948813.23-P1P2	-0.0745953	-0.177123	-0.574202	-0.0745953	-0.22399	-1.42662	-0.0745953	-0.06289	-0.327414	-0.0497599	0.0727309	0.00203686
AASDHPPT_+_105948816.23-P1P2	-0.0149473	-0.108028	-0.255019	-0.0149473	-0.14911	-0.744648	-0.0149473	0.121151	0.188229	-0.0306553	-0.137451	-0.327239
AASDHPPT_-_105948374.23-P1P2	0.00765323	-0.104286	-0.179315	0.00765323	0.0202002	0.165414	0.00765323	0.0470081	0.114382	-0.0440656	0.072626	0.017922
AASDHPPT_-_105948417.23-P1P2	-0.0279505	0.166918	0.260032	-0.0279505	0.33152	1.40448	-0.0279505	0.0645608	0.0450008	0.0284878	0.204513	0.463219
AASDHPPT_-_105948422.23-P1P2	-0.0845511	0.380003	0.518889	-0.0845511	0.108691	0.0555824	-0.0845511	-0.0573285	-0.345592	-0.0143953	-0.0653766	-0.149924
AASDHPPT_-_105948779.23-P1P2	-0.0405633	-0.038374	-0.191859	-0.0405633	-0.0869844	-0.601579	-0.0405633	0.130226	0.13166	0.00209138	0.114399	0.224397
AASDH_+_57253516.23-P1P2	-0.0282456	0.494033	0.918577	-0.0282456	-0.132385	-0.742166	-0.0282456	0.267975	0.424784	0.0483967	0.00474257	0.155198
AASDH_+_57253570.23-P1P2	-0.0151384	-0.193165	-0.427225	-0.0151384	0.094144	0.379025	-0.0151384	-0.0201537	-0.0767316	-0.00769739	-0.263643	-0.492502
AASDH_+_57253636.23-P1P2	0.0443825	-0.337984	-0.539658	0.0443825	-0.0435448	0.0774105	0.0443825	-0.385061	-0.588654	0.0448627	-0.323638	-0.453497
AASDH_+_57253649.23-P1P2	-0.0833695	-0.0795051	-0.403875	-0.0833695	-0.138756	-1.0819	-0.0833695	0.0171979	-0.202745	-0.0933354	0.0177633	-0.221207
AASDH_-_57253280.23-P1P2	-0.158342	0.217181	-0.0318938	-0.158342		-0.305159	-0.158342	0.347307	0.199696	0.0598159	-0.367525	-0.491298
AASDH_-_57253356.23-P1P2	-0.000356226	-0.159474	-0.314725	-0.000356226	0.257542	1.21774	-0.000356226	0.13808	0.261801	-0.0440501	-0.411781	-0.865226
AASDH_-_57253362.23-P1P2	-0.00510491	0.303269	0.603805	-0.00510491	0.149872	0.693175	-0.00510491	-0.0675238	-0.136563	0.0323617	-0.227349	-0.313232
AASDH_-_57253574.23-P1P2	0.0212997	-0.0959935	-0.121441	0.0212997	-0.144365	-0.518686	0.0212997	-0.127666	-0.173289	-0.00264435	-0.0838277	-0.150389
AASDH_-_57253588.23-P1P2	0.0563964	0.00258118	0.183126	0.0563964	-0.232218	-0.727344	0.0563964	-0.235845	-0.274944	-0.0407645	0.41666	0.6545
AASDH_-_57253646.23-P1P2	-0.0696459	-0.00335988	-0.208984	-0.0696459	0.364806	1.32369	-0.0696459	0.319556	0.402435	-0.0425519	0.323209	0.47907
AASS_+_121784000.23-P1P2	0.0299031	-0.00228922	0.0934056	0.0299031	0.26571	1.42583	0.0299031	0.0552943	0.193771	0.0183651	-0.152072	-0.2155
AASS_+_121784213.23-P1P2	-0.0188265	0.0605998	0.0732202	-0.0188265	0.00862123	-0.0371712	-0.0188265	0.186511	0.299393	-0.00609203	-0.0820859	-0.156947
AASS_+_121784219.23-P1P2	0.000764189	-0.0615337	-0.113907	0.000764189	0.0307665	0.175494	0.000764189	0.0205997	0.0451862	0.00900217	0.278476	0.543061
AASS_+_121784247.23-P1P2	0.0176142	-0.42452	-0.794839	0.0176142	0.0837627	0.515379	0.0176142	-0.232454	-0.379951	-0.00815578	-0.0540995	-0.111747
AASS_+_121784250.23-P1P2	0.0597365	0.0776223	0.344476	0.0597365	-0.202481	-0.571048	0.0597365	-0.115263	-0.0397191	0.0545403	-0.046392	0.0793115
AASS_-_121784091.23-P1P2	-0.0427417	-0.265752	-0.656804	-0.0427417	0.0205299	-0.11672	-0.0427417	-0.113277	-0.33024	-0.0450248	-0.25421	-0.580688
AASS_-_121784229.23-P1P2	0.0307052	-0.0975326	-0.0961781	0.0307052	-0.240475	-0.910133	0.0307052	-0.0253726	0.0451293	0.00471054	-0.476115	-0.84486
AASS_-_121784277.23-P1P2	0.000466362	0.124688	0.260602	0.000466362	0.367465	1.73063	0.000466362	0.105827	0.203809	-0.0234954	-0.433839	-0.847414
AASS_-_121784313.23-P1P2	0.0372552	-0.158886	-0.200107	0.0372552	-0.10843	-0.262719	0.0372552	0.0392365	0.184833	0.0654516	-0.0766961	0.054865
AASS_-_121784328.23-P1P2	0.0709742	-0.457725	-0.700847	0.0709742	0.33668	1.98516	0.0709742	-0.305106	-0.36269	0.0324078	0.0623884	0.215159
AATF_+_35306366.23-P1P2	-0.0139224	0.0421258	0.0507685	-0.0139224	-0.0418925	-0.243131	-0.0139224	0.109854	0.170031	-0.044201	-0.216039	-0.508768
AATF_+_35306650.23-P1P2	-0.0432232	-0.351597	-0.831312	-0.0432232	-0.0179316	-0.297267	-0.0432232	0.0251275	-0.0726384	-0.00223044	-0.135165	-0.242821
AATF_-_35306286.23-P1P2	-0.393269		-0.934379	-0.393269		-1.32221	-0.393269	0.561937	-0.0732116	-0.244754		-0.527027
AATF_-_35306312.23-P1P2	-0.0157619	-0.0223342	-0.084725	-0.0157619	0.219632	0.955741	-0.0157619	-0.172118	-0.36288	-0.0862632	0.212839	0.15443
AATF_-_35306320.23-P1P2	-0.340174	0.464349	-0.0820134	-0.340174		-0.700546	-0.340174		-0.53433	-0.153042	0.0529699	-0.325584
AATF_-_35306333.23-P1P2	-0.016343	-0.307694	-0.661739	-0.016343	0.355189	1.57926	-0.016343	0.191551	0.315953	-0.0314356	0.419848	0.68665
AATF_-_35306340.23-P1P2	-0.0172432	-0.30706	-0.663176	-0.0172432	-0.130762	-0.672735	-0.0172432	-0.0367759	-0.113879	-0.0323594	-0.300834	-0.629937
AATF_-_35306346.23-P1P2	-0.0827807	-0.165305	-0.575064	-0.0827807	-0.0210326	-0.534263	-0.0827807	-0.0500697	-0.326926	-0.118266	0.186839	0.0166736
AATF_-_35306351.23-P1P2	0.0293943	0.0102306	0.11711	0.0293943	-0.194569	-0.705253	0.0293943	0.068397	0.216828	0.0030254	0.0827664	0.16936
AATF_-_35306747.23-P1P2	0.0022161	0.154651	0.326282	0.0022161	0.00661376	0.0719895	0.0022161	0.000525885	0.0117926	0.0266952	-0.202239	-0.28345
AATK_+_79139544.23-ENST00000326724.4	0.0051293	0.130629	0.286642	0.0051293	0.11946	0.61016	0.0051293	0.111829	0.228429	-0.00726077	0.200959	0.355813
AATK_+_79139571.23-ENST00000326724.4	-0.0524365	0.243305	0.340174	-0.0524365	0.432501	1.73357	-0.0524365	-0.209484	-0.538099	-0.00679675	-0.221566	-0.413243
AATK_+_79139589.23-ENST00000326724.4	0.00309219	0.148973	0.317478	0.00309219	0.0781166	0.407533	0.00309219	0.113055	0.224874	-0.0606424	0.165836	0.141065
AATK_+_79139592.23-ENST00000326724.4	0.0242293	0.0918361	0.266043	0.0242293	-0.0688148	-0.152868	0.0242293	-0.132082	-0.17314	-0.0129725	-0.109319	-0.226025
AATK_-_79139586.23-ENST00000326724.4	-0.118089	-0.33039	-1.01435	-0.118089	0.0318383	-0.488539	-0.118089	0.274255	0.178578	-0.0925559	-0.0150475	-0.278828
AATK_-_79139702.23-ENST00000326724.4	-0.106944	0.102871	-0.107319	-0.106944	0.180177	0.260078	-0.106944	0.248349	0.162102	-0.0888603	0.305158	0.315419
AATK_-_79139880.23-ENST00000326724.4	0.0195212	0.0927147	0.253615	0.0195212	0.270906	1.39142	0.0195212	0.112561	0.27112	0.0194578	0.0477295	0.151872
AATK_-_79139956.23-ENST00000326724.4	0.00143173	0.155407	0.32544	0.00143173	-0.0324797	-0.113184	0.00143173	-0.0328961	-0.0529991	0.00872648	-0.0865235	-0.123202
AATK_-_79139960.23-ENST00000326724.4	-0.0391141	-0.323718	-0.762717	-0.0391141	0.273861	1.07504	-0.0391141	0.0462323	-0.0213487	0.00899437	-0.129506	-0.200812
AATK_-_79139975.23-ENST00000326724.4	0.00770405	-0.257535	-0.488099	0.00770405	0.427168	2.04742	0.00770405	-0.108744	-0.176917	0.0358364	-0.112854	-0.0946704
ABAT_+_8768492.23-P1	0.0242759	0.0501687	0.182185	0.0242759	0.113257	0.689252	0.0242759	-0.122466	-0.155013	0.00180978	0.0376507	0.0836708
ABAT_+_8768526.23-P1	0.000978688	-0.357984	-0.710879	0.000978688	-0.138351	-0.605257	0.000978688	0.0549898	0.110153	-0.0209301	0.075121	0.0877881
ABAT_+_8768542.23-P1	0.005716	0.0165492	0.0584362	0.005716	0.0658035	0.365369	0.005716	0.146539	0.295062	-0.0406073	-0.42895	-0.88681
ABAT_+_8768682.23-P1	0.0476283	0.280021	0.715977	0.0476283	0.199658	1.22019	0.0476283	-0.265809	-0.356188	0.0616905	-0.434347	-0.607839
ABAT_+_8768874.23-P1	-0.00338731	0.259929	0.521614	-0.00338731	-0.0428415	-0.18822	-0.00338731	0.0987931	0.179583	0.00287168	-0.0973408	-0.159454
ABAT_+_8807437.23-P2	-0.0415488	-0.0535808	-0.225487	-0.0415488	-0.0902364	-0.622163	-0.0415488	-0.127312	-0.353077	0.0366916	0.432336	0.901759
ABAT_+_8807445.23-P2	0.0155232	-0.0528084	-0.0518052	0.0155232	-0.043881	-0.0865842	0.0155232	-0.0858882	-0.111699	-0.0497053	0.292032	0.402031
ABAT_+_8807450.23-P2	0.0538172	0.0593604	0.289809	0.0538172	-0.215247	-0.663394	0.0538172	-0.234081	-0.279048	-0.00144323	0.331213	0.609723
ABAT_+_8807464.23-P2	-0.0189117	-0.09415	-0.238999	-0.0189117	0.468542	2.08892	-0.0189117	0.214023	0.35063	0.0107011	0.0908692	0.205804
ABAT_+_8807492.23-P2	0.0077502	-0.367246	-0.709128	0.0077502	-0.167848	-0.703531	0.0077502	-0.415074	-0.749993	-0.0920732	-0.196443	-0.608195
ABAT_+_8807600.23-P2	-0.0414208	0.0401017	-0.0362447	-0.0414208	-0.0321724	-0.352968	-0.0414208	-0.521914	-1.09109	-0.0495605	0.243317	0.31362
ABAT_+_8807610.23-P2		0.491581	0.988605
ABAT_+_8807696.23-P2	0.00601596	0.148615	0.325573	0.00601596	0.360521	1.72976	0.00601596	0.106167	0.22038	0.0539413	0.00758399	0.176032
ABAT_+_8807706.23-P2	0.0644176	0.122635	0.449334	0.0644176	0.517655	2.78504	0.0644176	-0.244321	-0.267773	0.0211781	0.283419	0.586448
ABAT_+_8807798.23-P2	0.0376664	-0.404373	-0.693747	0.0376664	-0.123765	-0.331311	0.0376664	-0.0215815	0.0722105	-0.00691965	-0.0854723	-0.165458
ABAT_-_8768466.23-P1	-0.0054129	0.0259023	0.0437273	-0.0054129	-0.237191	-1.09825	-0.0054129	-0.0179827	-0.0447453	-0.0182274	-0.180608	-0.370838
ABAT_-_8768504.23-P1	0.0261035	-0.0967233	-0.108425	0.0261035	-0.145581	-0.497267	0.0261035	0.187111	0.429518	-0.00455701	0.0680577	0.121135
ABAT_-_8768523.23-P1	-0.0380918	-0.355487	-0.823677	-0.0380918	0.25186	0.979068	-0.0380918	0.0394348	-0.0311332	-0.0241228	-0.117982	-0.2733
ABAT_-_8768530.23-P1	-0.00318951	0.209692	0.420938	-0.00318951	-0.193032	-0.88155	-0.00318951	0.0226644	0.0376979	0.000652854	-0.0297491	-0.0424818
ABAT_-_8768533.23-P1	-0.0402317	0.0561123	-0.000382459	-0.0402317	0.124312	0.377272	-0.0402317	0.256017	0.367993	-0.0196146	-0.106056	-0.238828
ABCA10_+_67224502.23-P1P2	-0.00882313	0.0180732	0.0176596	-0.00882313	-0.230218	-1.0852	-0.00882313	0.0449019	0.0631335	-0.0246655	0.0569058	0.0440313
ABCA10_+_67224811.23-P1P2	0.0477926	-0.244204	-0.34032	0.0477926	0.000664381	0.301018	0.0477926	-0.362762	-0.537135	-0.0355739	0.30925	0.47332
ABCA10_+_67224827.23-P1P2	-0.0187234	0.227742	0.410475	-0.0187234	-0.317809	-1.54593	-0.0187234	0.12959	0.193178	-0.048218	-0.239196	-0.56233
ABCA10_+_67224916.23-P1P2	-0.00338731	0.214617	0.430269	-0.00338731	-0.0977727	-0.442209	-0.00338731	-0.28175	-0.532494	-0.0902549	0.173759	0.0719084
ABCA10_+_67224929.23-P1P2	0.000609435	0.380543	0.776816	0.000609435	0.164698	0.793891	0.000609435	0.00128583	0.00860161	-0.0293531	-0.144251	-0.33596
ABCA10_-_67224447.23-P1P2	0.0665013	-0.0277931	0.152369	0.0665013	-0.0154151	0.331976	0.0665013	-0.0886822	0.029442	0.0156759	0.146939	0.322077
ABCA10_-_67224767.23-P1P2	-0.0216861	0.143134	0.230979	-0.0216861	0.191246	0.791146	-0.0216861	0.306778	0.516226	-0.0310849	0.0250729	-0.0321314
ABCA10_-_67224823.23-P1P2	-0.0704903	-0.040576	-0.286555	-0.0704903	-0.104958	-0.853137	-0.0704903	-0.0738463	-0.336129	0.00169005	0.0204336	0.0519418
ABCA10_-_67224857.23-P1P2	-0.0673025	0.480708	0.773924	-0.0673025	0.0408359	-0.161076	-0.0673025	0.0139378	-0.162713	0.0720063	0.0081758	0.228113
ABCA10_-_67224969.23-P1P2	0.00170154	-0.352317	-0.697275	0.00170154	0.182294	0.881397	0.00170154	-0.0491683	-0.082673	0.013827	-0.540695	-0.936866
ABCA12_+_216002868.23-P1P2	0.0513499	0.190182	0.546093	0.0513499	-0.175767	-0.494738	0.0513499	-0.0367507	0.0831139	0.0402359	-0.250082	-0.33245
ABCA12_+_216002883.23-P1P2	-0.000248623	0.0535962	0.115131	-0.000248623	-0.117592	-0.516181	-0.000248623	0.188691	0.356812	0.0450839	-0.0110175	0.11711
ABCA12_+_216002996.23-P1P2	0.0146875	0.266903	0.590185	0.0146875	0.414326	2.02735	0.0146875	0.0757043	0.188276	0.0121327	-0.0547233	-0.0556056
ABCA12_+_216003308.23-P1P2	-0.00807363	0.0277725	0.039473	-0.00807363	-0.044733	-0.223343	-0.00807363	-0.39519	-0.75822	-0.0293555	0.200317	0.292264
ABCA12_+_216003314.23-P1P2	0.0042896	0.0727401	0.16741	0.0042896	-0.127295	-0.535502	0.0042896	-0.284436	-0.515478	-0.0482483	0.0452273	-0.0438415
ABCA12_+_216003317.23-P1P2	0.0215315	0.205399	0.48684	0.0215315	0.0366216	0.319459	0.0215315	-0.0770364	-0.0778842	0.0492949	0.208723	0.529639
ABCA12_+_216003325.23-P1P2	0.00218113	0.0209749	0.056697	0.00218113	0.0751206	0.388552	0.00218113	0.138526	0.26992	-0.0190073	0.20623	0.33226
ABCA12_+_216003340.23-P1P2	-0.0442031	-0.111834	-0.350925	-0.0442031	-0.131421	-0.82753	-0.0442031	0.1141	0.0910349	-0.107367	0.155524	-0.00965086
ABCA12_-_216002923.23-P1P2	0.105061	-0.0521182	0.219625	0.105061	-0.260788	-0.585529	0.105061	-0.405216	-0.452147	0.0671241	-0.234219	-0.227617
ABCA12_-_216003059.23-P1P2	-0.0403773	-0.0836429	-0.282556	-0.0403773	-0.16523	-0.962321	-0.0403773	0.0777819	0.0340604	0.0203883	0.107269	0.263054
ABCA13_+_48211090.23-P1P2	0.0620182	-0.185033	-0.178134	0.0620182	0.0697196	0.700385	0.0620182	-0.013474	0.1573	0.0447772	0.182565	0.469192
ABCA13_+_48211097.23-P1P2	-0.0197595	-0.354604	-0.76661	-0.0197595	0.610691	2.74141	-0.0197595	-0.48105	-0.952435	-0.0836854	0.0985821	-0.0466103
ABCA13_+_48211145.23-P1P2	0.0234498	-0.360756	-0.648694	0.0234498	-0.153903	-0.550683	0.0234498	-0.285034	-0.461583	0.0231616	-0.211823	-0.310899
ABCA13_+_48211160.23-P1P2	-0.0236744	-0.0698951	-0.204467	-0.0236744	-0.0760806	-0.456099	-0.0236744	0.104295	0.13163	0.00648159	-0.412259	-0.723435
ABCA13_+_48211170.23-P1P2	0.0581637	0.0178878	0.219313	0.0581637	0.0517457	0.595582	0.0581637	-0.369594	-0.520143	0.0465608	0.071006	0.270829
ABCA13_-_48211093.23-P1P2	0.0247017	-0.215646	-0.352391	0.0247017	-0.189819	-0.709702	0.0247017	0.286439	0.611358	-0.0474262	0.200387	0.241374
ABCA13_-_48211142.23-P1P2	-0.073359	0.109692	0.00772056	-0.073359	-0.133422	-1.00089	-0.073359	-0.0497308	-0.29924	-0.0286904	0.0680304	0.0529509
ABCA13_-_48211206.23-P1P2	-0.0224459	0.100234	0.142205	-0.0224459	0.420851	1.84851	-0.0224459	-0.196207	-0.427147	0.0191488	-0.47231	-0.797159
ABCA13_-_48211352.23-P1P2	0.00878631	0.0348215	0.104531	0.00878631	0.0482467	0.301472	0.00878631	0.103412	0.223179	0.048083	-0.341344	-0.476689
ABCA13_-_48211482.23-P1P2	-0.050655	-0.339572	-0.829485	-0.050655	0.49632	2.03868	-0.050655	-0.348889	-0.793841	-0.00109335	0.137018	0.256645
ABCA1_+_107689930.23-P1P2	0.0442564	-0.370492	-0.605572	0.0442564	-0.225197	-0.763213	0.0442564	0.00709618	0.144794	0.0606517	0.229062	0.598785
ABCA1_+_107689978.23-P1P2	0.0435471	-0.445275	-0.758468	0.0435471	-0.17754	-0.546853	0.0435471	0.122837	0.359332	0.0118359	0.181582	0.374399
ABCA1_+_107690410.23-P1P2	0.0575923	-0.282129	-0.387219	0.0575923	0.0366407	0.522524	0.0575923	0.0274578	0.221185	-0.0138291	0.197415	0.330807
ABCA1_-_107689997.23-P1P2	-0.0525894	-0.18516	-0.524036	-0.0525894	-0.18938	-1.14272	-0.0525894	0.264981	0.349287	0.00734728	-0.162944	-0.266429
ABCA1_-_107690031.23-P1P2	0.0116803	-0.0529077	-0.0635954	0.0116803	-0.243539	-1.03139	0.0116803	-0.227628	-0.387958	-0.0129399	0.155431	0.256771
ABCA1_-_107690202.23-P1P2	-0.0195631	0.0182572	-0.0143603	-0.0195631	0.525693	2.3495	-0.0195631	0.112581	0.15894	0.0778816	-0.0613	0.118029
ABCA1_-_107690338.23-P1P2	0.032206	-0.0443581	0.0155437	0.032206	-0.205284	-0.738972	0.032206	-0.0749877	-0.0434019	-0.105336	-0.150482	-0.561841
ABCA1_-_107690385.23-P1P2	-0.328844		-1.00148	-0.328844		-1.37938	-0.328844		-1.02832	-0.390589		-0.875067
ABCA1_-_107690389.23-P1P2	-0.184227	0.030369	-0.486555	-0.184227	0.0866455	-0.607395	-0.184227	0.206632	-0.137856	-0.139782	0.13459	-0.139334
ABCA1_-_107690394.23-P1P2	0.0198504	0.201537	0.473984	0.0198504	-0.216762	-0.861589	0.0198504	-0.0577891	-0.0466953	0.0314013	0.0553972	0.199571
ABCA2_+_139922190.23-P1P2	-0.0325171	0.269569	0.453195	-0.0325171	-0.0433284	-0.354434	-0.0325171	-0.234081	-0.526932	-0.0138892	-0.0703255	-0.157518
ABCA2_+_139922193.23-P1P2	-0.0455305	0.277956	0.430855	-0.0455305	0.01683	-0.149525	-0.0455305	-0.155855	-0.417919	0.028181	-0.107429	-0.106393
ABCA2_+_139922201.23-P1P2	0.028334	-0.00958432	0.0739672	0.028334	0.0182471	0.27279	0.028334	0.226472	0.509576	-0.0329623	-0.116222	-0.295046
ABCA2_+_139922272.23-P1P2	0.024255	-0.202199	-0.326629	0.024255	0.180585	1.00044	0.024255	0.19216	0.43366	0.0590967	0.146567	0.443987
ABCA2_+_139922290.23-P1P2	-0.0410261	0.43722	0.765503	-0.0410261	0.0738011	0.13925	-0.0410261	-0.201412	-0.490234	0.0402782	0.186508	0.463679
ABCA2_+_139922669.23-P1P2	-0.00733227	-0.0673568	-0.150064	-0.00733227	0.334743	1.53543	-0.00733227	0.185761	0.330991	-0.0340083	0.343318	0.539853
ABCA2_-_139922262.23-P1P2	0.0475561	-0.50892	-0.87468	0.0475561	-0.117784	-0.247992	0.0475561	-0.280976	-0.384777	-0.0137	-0.232955	-0.453497
ABCA2_-_139922304.23-P1P2	-0.00925366	-0.222846	-0.469311	-0.00925366	0.0244359	0.089835	-0.00925366	0.222717	0.394627	0.0213112	0.0712779	0.200038
ABCA2_-_139922347.23-P1P2	0.0105075	0.13528	0.312239	0.0105075	0.348789	1.7008	0.0105075	-0.314369	-0.553636	0.0358272	-0.0185295	0.07728
ABCA2_-_139922596.23-P1P2	-0.0382315	0.20662	0.309062	-0.0382315	-0.1188	-0.735563	-0.0382315	-0.0182709	-0.139514	0.0137111	0.21481	0.440276
ABCA3_+_2390336.23-P1P2	-0.0714552	-0.335679	-0.884369	-0.0714552	0.0875006	0.0313167	-0.0714552	0.190572	0.155883	-0.106632	0.0281646	-0.239782
ABCA3_+_2390611.23-P1P2	-0.0136348	0.34593	0.664079	-0.0136348	0.144477	0.620217	-0.0136348	-0.200997	-0.41081	-0.0488156	-0.408154	-0.872068
ABCA3_+_2390721.23-P1P2	0.0351458	-0.00468273	0.104392	0.0351458	-0.0939586	-0.207681	0.0351458	-0.182295	-0.235755	0.0399862	0.0753712	0.260226
ABCA3_-_2390323.23-P1P2	-0.0196076	-0.148344	-0.350348	-0.0196076	-0.121233	-0.641982	-0.0196076	0.442863	0.776839	0.108995	0.313572	0.889352
ABCA3_-_2390333.23-P1P2	0.0310297	-0.0521182	-0.00364748	0.0310297	-0.0545786	-0.0487657	0.0310297	-0.208262	-0.296164	-0.121262	-0.196443	-0.690602
ABCA3_-_2390500.23-P1P2	-0.0541163	-0.234065	-0.62723	-0.0541163	0.151403	0.42438	-0.0541163	0.128799	0.0900765	0.070338	0.160205	0.50059
ABCA3_-_2390670.23-P1P2	-0.0565158	0.196778	0.234077	-0.0565158		0.703492	-0.0565158		-0.36609	-0.107526		-0.240094
ABCA3_-_2390673.23-P1P2	0.00421863	-0.0483252	-0.0768612	0.00421863	-0.127538	-0.537026	0.00421863	-0.257173	-0.464668	-0.0448363	-0.0571884	-0.220937
ABCA3_-_2390704.23-P1P2	-0.275324	0.524356	0.234538	-0.275324		-0.827163	-0.275324		-0.575405	-0.205101	0.631136	0.581578
ABCA3_-_2390733.23-P1P2	-0.069215	-0.138774	-0.480668	-0.069215	-0.175446	-1.17188	-0.069215	0.00313929	-0.188411	-0.0421317	0.188402	0.234469
ABCA4_+_94586620.23-P1P2	0.0569374	-0.172652	-0.168499	0.0569374	-0.292327	-1.00223	0.0569374	0.0670976	0.293479	-0.0415949	-0.00765457	-0.121474
ABCA4_+_94586668.23-P1P2	-0.0105812	-0.368835	-0.767616	-0.0105812	-0.0902364	-0.447855	-0.0105812	-0.416703	-0.805675	0.0311354	0.396372	0.820501
ABCA4_+_94586689.23-P1P2	0.0634596	-0.475065	-0.758468	0.0634596	-0.2944	-0.975106	0.0634596	-0.418566	-0.596574	0.0121366	0.1655	0.345926
ABCA4_-_94586219.23-P1P2	0.0020515	-0.261281	-0.512697	0.0020515	-0.209667	-0.928965	0.0020515	0.0212552	0.050109	-0.00140637	0.298334	0.549881
ABCA4_-_94586232.23-P1P2	-0.0107751	0.0717792	0.120039	-0.0107751	-0.147408	-0.713292	-0.0107751	-0.199567	-0.399924	-0.0949598	0.430555	0.526827
ABCA4_-_94586250.23-P1P2	0.00901143	-0.562583	-1.09911	0.00901143	-0.140824	-0.571478	0.00901143	-0.260187	-0.456546	-0.00466632	0.117449	0.21088
ABCA4_-_94586284.23-P1P2	0.0704612	0.410576	1.04803	0.0704612	-0.179691	-0.405307	0.0704612	-0.0219798	0.165626	0.0104145	0.169033	0.347506
ABCA4_-_94586293.23-P1P2	-0.00647882	-0.225697	-0.466691	-0.00647882	0.111835	0.509568	-0.00647882	0.249471	0.452656	0.0609597	0.354314	0.828021
ABCA4_-_94586628.23-P1P2	0.0496567	0.0493125	0.257005	0.0496567	-0.160789	-0.435013	0.0496567	0.00671179	0.15958	0.00536275	-0.406084	-0.715335
ABCA4_-_94586658.23-P1P2	0.0339998	0.331567	0.778787	0.0339998	0.466605	2.37778	0.0339998	-0.337761	-0.529956	-0.0132481	0.359449	0.627875
ABCA5_+_67322884.23-P1P2	0.021068	-0.22984	-0.391962	0.021068	0.340812	1.72335	0.021068	-0.0580238	-0.0436384	-0.0415949	0.414566	0.648338
ABCA5_+_67323191.23-P1P2	0.0621736	0.427988	1.05813	0.0621736	0.43017	2.3679	0.0621736	-0.0578686	0.0746749	0.0472182	0.296509	0.683833
ABCA5_+_67323221.23-P1P2	-0.103432	0.20582	0.110809	-0.103432		-0.345219	-0.103432		-0.378212	0.106881	-0.373466	-0.369254
ABCA5_-_67322845.23-P1P2	0.0344346	0.00100675	0.113717	0.0344346	-0.192583	-0.667701	0.0344346	-0.188048	-0.248562	0.0360857	0.133135	0.354531
ABCA5_-_67322851.23-P1P2	-0.0177284	0.186743	0.330827	-0.0177284	-0.026292	-0.192421	-0.0177284	0.20205	0.331623	0.0321077	-0.0713221	-0.0294749
ABCA5_-_67322872.23-P1P2	-0.0228356	-0.197476	-0.45913	-0.0228356	0.361806	1.57331	-0.0228356	0.162815	0.243541	-0.0488902	0.0402468	-0.0547344
ABCA5_-_67322891.23-P1P2	-0.00603086	-0.26519	-0.544954	-0.00603086	-0.109245	-0.510133	-0.00603086	-0.305709	-0.584917	-0.0606251	-0.177503	-0.484876
ABCA5_-_67323220.23-P1P2	-0.0474926	0.0298631	-0.075197	-0.0474926	0.321211	1.24682	-0.0474926	0.157429	0.162667	-0.101364	0.311899	0.292407
ABCA5_-_67323267.23-P1P2	0.0222156	-0.206468	-0.341386	0.0222156	-0.224748	-0.885201	0.0222156	-0.0596229	-0.0433356	0.0190036	-0.524396	-0.892536
ABCA5_-_67323280.23-P1P2	-0.0724139	0.30443	0.403147	-0.0724139	0.192011	0.50915	-0.0724139	0.227314	0.221883	0.010266	0.0931412	0.208717
ABCA6_+_67137671.23-P1P2	-0.0475422	0.101842	0.0697571	-0.0475422	0.106224	0.252489	-0.0475422	0.251097	0.337798	0.0461558	-0.122609	-0.083323
ABCA6_+_67137842.23-P1P2	-0.0237757	-0.0190871	-0.102348	-0.0237757	0.272629	1.15568	-0.0237757	-0.279972	-0.587707	0.0428234	0.150214	0.404692
ABCA6_+_67138008.23-P1P2	-0.0215001	-0.121374	-0.301686	-0.0215001	0.0437613	0.11026	-0.0215001	-0.261237	-0.546115	0.0636095	-0.480267	-0.686144
ABCA6_+_67138026.23-P1P2	0.0258795	-0.305728	-0.530436	0.0258795	0.348795	1.78735	0.0258795	-0.152361	-0.206348	0.0295545	0.111954	0.297473
ABCA6_+_67138050.23-P1P2	0.00160885	-0.326329	-0.645164	0.00160885	0.536421	2.51827	0.00160885	0.154138	0.29749	0.0117887	-0.148278	-0.227149
ABCA6_+_67138055.23-P1P2	-0.0133835	-0.503551	-1.04764	-0.0133835	0.0471921	0.171808	-0.0133835	-0.257757	-0.5163	-0.072946	0.449684	0.623854
ABCA6_-_67137744.23-P1P2	0.0158626	-0.400901	-0.752506	0.0158626	0.0315108	0.26392	0.0158626	0.170173	0.368421	0.0829187	-0.337345	-0.371047
ABCA6_-_67137748.23-P1P2	0.0301863	-0.116243	-0.135461	0.0301863	-0.305356	-1.21305	0.0301863	-0.0593624	-0.0199628	0.0103088	-0.214617	-0.35228
ABCA6_-_67137854.23-P1P2	0.0683863	-0.296768	-0.384177	0.0683863	0.34519	2.00994	0.0683863	-0.293106	-0.347666	0.0347088	0.0682239	0.232295
ABCA6_-_67137948.23-P1P2	-0.0835031	0.028723	-0.1861	-0.0835031	-0.0548465	-0.694677	-0.0835031	-0.429969	-1.03987	-0.00208623	-0.5385	-0.977792
ABCA7_+_1040413.23-P1	-0.0279006	0.0246534	-0.0266113	-0.0279006	0.36396	1.55475	-0.0279006	0.104711	0.120274	-0.0390276	0.181147	0.230006
ABCA7_+_1040474.23-P1	-0.0457929	-0.288876	-0.712622	-0.0457929	-0.0696106	-0.550683	-0.0457929	0.0971101	0.0546781	0.0378756	0.188958	0.461364
ABCA7_+_1040513.23-P1	0.048794	-0.0842321	-0.0148107	0.048794	0.439125	2.33399	0.048794	-0.11102	-0.0631981	-0.0111681	0.00480401	-0.0128565
ABCA7_+_1040541.23-P1	0.0351458	-0.129372	-0.14697	0.0351458	-0.0362502	0.0591485	0.0351458	-0.0173862	0.0728234	0.0175097	0.11635	0.271484
ABCA7_+_1040560.23-P1	0.0985868	-0.10797	0.0875071	0.0985868	0.131773	1.19314	0.0985868	0.145035	0.558902	0.00730755	0.248753	0.484083
ABCA7_+_1040577.23-P1	-0.0585784	0.125356	0.0838745	-0.0585784	-0.0160275	-0.374893	-0.0585784	0.366306	0.521692	-0.00867727	0.0300912	0.0402805
ABCA7_+_1041292.23-P2	0.0543632	-0.419309	-0.673501	0.0543632	0.0980306	0.788201	0.0543632	-0.351071	-0.496394	0.0314989	0.0373271	0.166901
ABCA7_+_1041297.23-P2	0.0235088	-0.0889463	-0.100572	0.0235088	-0.00837548	0.122533	0.0235088	0.354663	0.735593	0.0550488	-0.341014	-0.45642
ABCA7_+_1041311.23-P2	-0.0499616	-0.271536	-0.690237	-0.0499616	-0.0555003	-0.508904	-0.0499616	0.242424	0.314622	-0.0138679	-0.0337034	-0.0906873
ABCA7_+_1041348.23-P2	0.027645	0.0124162	0.11624	0.027645	-0.138179	-0.454367	0.027645	-0.402205	-0.668791	-0.0191796	-0.0250782	-0.0899575
ABCA7_+_1041432.23-P2	-0.174416	0.140491	-0.234973	-0.174416	0.248449	0.195964	-0.174416	0.00105378	-0.494369	-0.0302189	-0.0287098	-0.127746
ABCA7_+_1041489.23-P2	0.0696659	0.00622118	0.230483	0.0696659	-0.152866	-0.285752	0.0696659	-0.382521	-0.511307	0.0401756	0.148135	0.393426
ABCA7_+_1041673.23-P2	-0.0572391	0.176702	0.191424	-0.0572391	0.0199632	-0.200942	-0.0572391	0.0931953	0.0144884	-0.013058	0.36034	0.630037
ABCA7_-_1040133.23-P1	-0.00752848	0.37331	0.737691	-0.00752848	-0.0487562	-0.238877	-0.00752848	-0.136903	-0.273345	-0.00993155	0.447078	0.797007
ABCA7_-_1040209.23-P1	-0.000618774	0.1015	0.210585	-0.000618774	-0.157376	-0.702219	-0.000618774	-0.251938	-0.46876	0.0623402	0.0207077	0.223672
ABCA7_-_1040214.23-P1	0.070166	-0.175604	-0.134552	0.070166	-0.2291	-0.635422	0.070166	0.104098	0.400697	0.044867	0.114306	0.344993
ABCA7_-_1040526.23-P1	-0.0260272	0.135347	0.202188	-0.0260272	0.122766	0.450079	-0.0260272	-0.394719	-0.808888	-0.0531063	-0.0772688	-0.280897
ABCA7_-_1041459.23-P2	0.0121269	0.233232	0.514586	0.0121269	0.237537	1.19551	0.0121269	-0.0239128	-0.00548121	0.0189812	-0.246427	-0.385793
ABCA7_-_1041690.23-P2	0.0515508	-0.0671828	0.0278734	0.0515508	0.292993	1.67383	0.0515508	0.0519324	0.249636	0.0896222	-0.0859684	0.106199
ABCA7_-_1041717.23-P2	0.0376349	0.0798559	0.282322	0.0376349	-0.0643669	-0.0568457	0.0376349	-0.631677	-1.0695	-0.0630764	0.118618	0.0481039
ABCA8_+_66950951.23-P1P2	-0.00307821	0.381755	0.768138	-0.00307821	-0.0569003	-0.251485	-0.00307821	-0.324486	-0.611575	-0.0437722	-0.157792	-0.401357
ABCA8_+_66950959.23-P1P2	-0.00646971	0.0227646	0.0342146	-0.00646971	-0.135519	-0.63409	-0.00646971	-0.041525	-0.0918322	-0.0274924	-0.0988399	-0.247912
ABCA8_+_66951172.23-P1P2	0.00922168	0.0322094	0.100579	0.00922168	0.0418289	0.274249	0.00922168	-0.271501	-0.477112	0.0452826	0.244162	0.582925
ABCA8_+_66951401.23-P1P2	-0.184469	0.172676	-0.200407	-0.184469	-0.0113322	-1.06178	-0.184469	0.288073	0.0138437	-0.269913		-0.719729
ABCA8_-_66951365.23-P1P2	0.0147121	0.134698	0.323747	0.0147121	0.183743	0.961329	0.0147121	-0.190823	-0.310383	-0.0555777	-0.0917439	-0.314266
ABCA8_-_66951372.23-P1P2	-0.0388751	0.0150075	-0.0791547	-0.0388751	-0.146832	-0.868796	-0.0388751	-0.122064	-0.335581	-0.0151198	0.0506271	0.0595334
ABCA8_-_66951390.23-P1P2	-0.0535567	0.0244696	-0.104359	-0.0535567	-0.238294	-1.37433	-0.0535567	0.265774	0.347993	0.0142473	0.232998	0.474951
ABCA8_-_66951447.23-P1P2	0.0519391	-0.367843	-0.577062	0.0519391	-0.115673	-0.213559	0.0519391	-0.0761857	0.0110145	-0.00303028	0.233969	0.427943
ABCA8_-_66951525.23-P1P2	0.0832752	0.0267478	0.312908	0.0832752	-0.293712	-0.860388	0.0832752	-0.0932863	0.0689881	0.0204338	-0.0902432	-0.0969308
ABCA8_-_66951528.23-P1P2	0.00333328	-0.288876	-0.564462	0.00333328	0.00137068	0.0540351	0.00333328	-0.340876	-0.623835	0.0659744	0.011623	0.217368
ABCA9_+_67056924.23-P1P2	-0.115802	0.172424	0.00617764	-0.115802	0.205703	0.328239	-0.115802	0.0507663	-0.233052	-0.00528236	0.0549622	0.095211
ABCA9_+_67056982.23-P1P2	-0.0181582	0.015052	-0.0165846	-0.0181582	0.0381693	0.103214	-0.0181582	0.219841	0.363678	0.0532421	-0.38688	-0.545146
ABCA9_+_67057085.23-P1P2	0.0112263	-0.138547	-0.237606	0.0112263	-0.204581	-0.853808	0.0112263	-0.0448328	-0.0472128	0.0429033	-0.0506636	0.0386692
ABCA9_-_67056649.23-P1P2	-0.00121826	-0.0472837	-0.0911588	-0.00121826	0.194809	0.922827	-0.00121826	-0.0160139	-0.0290176	0.0408268	0.0801908	0.271386
ABCA9_-_67056810.23-P1P2	-0.061611	-0.271385	-0.725068	-0.061611	0.05012	-0.0861123	-0.061611	-0.0181055	-0.206332	0.043235	0.270849	0.625802
ABCA9_-_67056917.23-P1P2	-0.0503584	-0.0183645	-0.181063	-0.0503584	0.393547	1.56515	-0.0503584	0.0912371	0.0305801	-0.028795	-0.184328	-0.407455
ABCA9_-_67056936.23-P1P2	0.0690973	-0.259614	-0.307133	0.0690973	-0.268762	-0.824825	0.0690973	-0.139717	-0.0586011	0.0643168	-0.370147	-0.483372
ABCA9_-_67057012.23-P1P2	-0.0481554	0.138002	0.140802	-0.0481554	-0.0363357	-0.410125	-0.0481554	0.0333045	-0.0714989	-0.000499921	-0.313762	-0.563562
ABCA9_-_67057053.23-P1P2	-0.0513474	-0.0333045	-0.214163	-0.0513474	-0.0169004	-0.338228	-0.0513474	0.196379	0.224484	-0.0251038	0.405027	0.677504
ABCA9_-_67057069.23-P1P2	0.0101659	0.33086	0.705481	0.0101659	0.152814	0.792731	0.0101659	-0.125142	-0.200534	-0.00415274	0.058235	0.104367
ABCB10_+_229694012.23-P1P2	-0.0560047	-0.150023	-0.463504	-0.0560047	0.103271	0.1912	-0.0560047	-0.266166	-0.654409	0.0454346	0.154763	0.420359
ABCB10_+_229694285.23-P1P2	-0.232834		-0.45052	-0.232834	0.59082	1.45019	-0.232834	0.434502	0.148975	-0.0025451	0.0106062	0.0220671
ABCB10_+_229694391.23-P1P2	0.095743	-0.0264345	0.243298	0.095743	-0.210912	-0.407363	0.095743	-0.288918	-0.261282	0.0213331	-0.380643	-0.623862
ABCB10_+_229694413.23-P1P2	-0.0521791	0.209255	0.272308	-0.0521791	0.0219793	-0.163139	-0.0521791	-0.426863	-0.944123	-0.0779808	-0.384823	-0.911871
ABCB10_-_229694283.23-P1P2	0.0597603	0.0529029	0.294715	0.0597603	-0.0430238	0.166377	0.0597603	-0.000576138	0.174952	-0.00262714	-0.0539247	-0.0958201
ABCB10_-_229694290.23-P1P2	-0.00374124	-0.526521	-1.06487	-0.00374124	-0.130417	-0.595143	-0.00374124	0.106809	0.193566	0.0571357	-0.543248	-0.81925
ABCB10_-_229694297.23-P1P2	-0.179289		-0.325505	-0.179289		-0.117777	-0.179289	0.599467	0.6114	-0.0637045		-0.258012
ABCB10_-_229694400.23-P1P2	-0.0583117	0.0618258	-0.0433924	-0.0583117	0.122279	0.266104	-0.0583117	0.145136	0.108601	0.0273324	-0.00527751	0.0774588
ABCB10_-_229694457.23-P1P2	-0.0602085	0.00199781	-0.169721	-0.0602085	0.117885	0.235113	-0.0602085	0.192922	0.192573	-0.00605483	-0.360613	-0.664665
ABCB10_-_229694467.23-P1P2	0.0390064	0.00887381	0.143364	0.0390064	0.119493	0.800997	0.0390064	0.1729	0.439974	-0.0284936	0.206476	0.305926
ABCB11_+_169887409.23-P1P2	-0.0877078	-0.137388	-0.533647	-0.0877078	0.294776	0.898229	-0.0877078	0.362031	0.430056	-0.0370782	0.0132259	-0.0706519
ABCB11_+_169887589.23-P1P2	0.00451819	0.115202	0.253699	0.00451819	-0.0662776	-0.252085	0.00451819	0.255926	0.49631	0.0782171	-0.249807	-0.224718
ABCB11_+_169887604.23-P1P2	-0.00548465	0.310891	0.618023	-0.00548465	0.0187488	0.0847539	-0.00548465	0.0195535	0.0252869	0.0124856	0.300831	0.593654
ABCB11_+_169887776.23-P1P2	0.0208549	-0.0277931	0.0147036	0.0208549	-0.174454	-0.660314	0.0208549	-0.522856	-0.91405	-0.00718967	-0.281359	-0.523369
ABCB11_+_169887811.23-P1P2	0.0301247	-0.171547	-0.247135	0.0301247	0.0336695	0.354178	0.0301247	-0.146797	-0.183749	0.026433	0.0923877	0.252987
ABCB11_+_169887815.23-P1P2	-0.00773812	-0.0925799	-0.202135	-0.00773812	0.0372311	0.157528	-0.00773812	-0.0685031	-0.145956	0.01515	0.0768106	0.192732
ABCB11_-_169887416.23-P1P2	-0.0335704	0.0939444	0.0959737	-0.0335704	0.168606	0.619569	-0.0335704	0.0691507	0.0374535	-0.0210756	0.165678	0.252485
ABCB11_-_169887692.23-P1P2	0.0642336	0.180047	0.564518	0.0642336	0.608262	3.20295	0.0642336	0.0448031	0.27271	0.125854	-0.0740988	0.230131
ABCB11_-_169887784.23-P1P2	-0.0215448	-0.000461682	-0.0580727	-0.0215448	0.0618595	0.193689	-0.0215448	0.139808	0.204196	-0.0243379	0.186655	0.281521
ABCB11_-_169887796.23-P1P2	0.0019431	-0.24336	-0.476897	0.0019431	-0.23226	-1.03404	0.0019431	-0.0678552	-0.116947	0.0347884	-0.476151	-0.760009
ABCB1_+_87342475.23-ENST00000265724.3	-0.0948146	0.181241	0.0872485	-0.0948146	0.224389	0.532772	-0.0948146	0.412306	0.503725	0.0226149	0.0740802	0.208829
ABCB1_+_87342641.23-ENST00000265724.3	0.0420062	0.0668286	0.269243	0.0420062	-0.131228	-0.341389	0.0420062	0.257969	0.60777	-0.0700744	0.221941	0.216731
ABCB1_-_87342245.23-ENST00000265724.3	-0.00516197	-0.17999	-0.370578	-0.00516197	0.414687	1.9173	-0.00516197	0.284615	0.5222	-0.0701717	0.227313	0.22625
ABCB1_-_87342256.23-ENST00000265724.3	0.0361296	0.15123	0.421666	0.0361296	-0.190078	-0.646575	0.0361296	-0.0929932	-0.0658285	0.0930999	-0.266268	-0.212713
ABCB1_-_87342302.23-ENST00000265724.3	-0.0171595	-0.0451153	-0.134865	-0.0171595	0.110546	0.443486	-0.0171595	0.0779503	0.101039	0.0385807	0.0796457	0.264051
ABCB1_-_87342654.23-ENST00000265724.3	0.0597974	0.133445	0.457193	0.0597974	-0.0273069	0.239257	0.0597974	0.0463742	0.262913	0.0104635	0.0676422	0.162784
ABCB1_-_87342657.23-ENST00000265724.3	0.00851167	0.306334	0.65105	0.00851167	-0.072703	-0.259316	0.00851167	-0.33333	-0.594847	-0.0220893	0.170335	0.258113
ABCB1_-_87342674.23-ENST00000265724.3	-0.0261255	-0.24634	-0.567558	-0.0261255	-0.220633	-1.13827	-0.0261255	0.10148	0.119324	0.0202193	-0.509933	-0.862733
ABCB1_-_87342678.23-ENST00000265724.3	0.0151612	0.28887	0.635898	0.0151612	-0.0965419	-0.332113	0.0151612	0.247664	0.511409	0.0457894	-0.295538	-0.399649
ABCB1_-_87342682.23-ENST00000265724.3	-0.00884562	0.268712	0.522858	-0.00884562	0.092475	0.406728	-0.00884562	0.0949587	0.156736	-0.0113843	0.490195	0.871519
ABCB4_+_87104635.23-P1P2	0.0474549	0.0973417	0.347188	0.0474549	-0.0407111	0.107807	0.0474549	-0.524728	-0.841179	0.00212343	-0.390259	-0.695628
ABCB4_+_87104755.23-P1P2	-0.0520109	0.380464	0.617958	-0.0520109	0.0416781	-0.0711095	-0.0520109	0.170733	0.174588	-0.10938	0.361349	0.359935
ABCB4_+_87104897.23-P1P2	-0.0278363	0.137085	0.200235	-0.0278363	-0.0941471	-0.563061	-0.0278363	0.0454997	0.0096615	-0.0632801	-0.0214142	-0.207784
ABCB4_+_87104933.23-P1P2	0.0673646	0.0196778	0.25067	0.0673646	-0.187646	-0.459517	0.0673646	-0.401022	-0.552534	0.00628152	-0.10373	-0.161477
ABCB4_+_87104939.23-P1P2	0.041981	0.195839	0.529241	0.041981	0.488358	2.52329	0.041981	0.0593819	0.236098	0.0185732	-0.000829078	0.0608399
ABCB4_+_87104948.23-P1P2	-0.052805	0.115122	0.0806567	-0.052805	0.16778	0.507487	-0.052805	0.0141533	-0.120685	0.0322691	0.0259332	0.148301
ABCB4_+_87105008.23-P1P2	-0.0531765	0.252094	0.355659	-0.0531765	-0.0943015	-0.706408	-0.0531765	-0.140577	-0.411284	-0.0405143	-0.242121	-0.545913
ABCB4_-_87104608.23-P1P2	0.0393063	-0.270985	-0.419902	0.0393063	-0.0365865	0.0810121	0.0393063	-0.139809	-0.14431	0.0258371	-0.0946941	-0.0897912
ABCB4_-_87104975.23-P1P2	-0.0180848	0.157481	0.270762	-0.0180848	-0.161218	-0.818291	-0.0180848	0.0166984	-0.0162333	-0.0300581	-0.0821455	-0.224718
ABCB4_-_87104991.23-P1P2	-0.0464876	-0.211375	-0.558482	-0.0464876	0.112182	0.285973	-0.0464876	0.0285134	-0.0756755	0.000485983	0.216384	0.405808
ABCB5_+_20687051.23-P1P2	-0.139934		-0.62723	-0.139934		-0.680898	-0.139934		-0.672025	-0.0950007	-0.150907	-0.533436
ABCB5_+_20687204.23-P1P2	0.0461629	0.0370124	0.221673	0.0461629	-0.11747	-0.254382	0.0461629	-0.0219717	0.0958754	-0.0481886	0.290833	0.404126
ABCB5_+_20687218.23-P1P2	-0.00886526	-0.226405	-0.475315	-0.00886526	-0.10957	-0.527589	-0.00886526	0.42617	0.776447	-0.0213281	-0.2056	-0.425158
ABCB5_+_20687242.23-P1P2	-0.0403438	0.0735182	0.0343682	-0.0403438	-0.177787	-1.0202	-0.0403438	-0.107981	-0.313446	-0.00508805	0.0905313	0.160611
ABCB5_+_20687409.23-P1P2
ABCB5_+_20687450.23-P1P2	-0.0973814	-0.0124481	-0.310953	-0.0973814	-0.0263558	-0.64106	-0.0973814	-0.007153	-0.288542	-0.0265607	0.217115	0.330782
ABCB5_-_20687157.23-P1P2	0.0310439	-0.309023	-0.521504	0.0310439	-0.251581	-0.959579	0.0310439	-0.0287854	0.0397157	0.093499	0.0428292	0.351973
ABCB5_-_20687194.23-P1P2	0.00715269	0.059823	0.150005	0.00715269	0.341966	1.65037	0.00715269	-0.294881	-0.526802	0.0217336	-0.0508434	-0.0214258
ABCB5_-_20687236.23-P1P2	-0.0878423	0.0426772	-0.171056	-0.0878423	0.318717	1.00817	-0.0878423	0.0337052	-0.184699	0.0370666	-0.209775	-0.267908
ABCB5_-_20687396.23-P1P2	-0.00240749	-0.131861	-0.265246	-0.00240749	-0.152273	-0.688691	-0.00240749	-0.208893	-0.393349	-0.0770253	0.122165	0.0151903
ABCB6_+_220083287.23-P1P2	-0.0375873	0.0827188	0.0612294	-0.0375873	-0.0982179	-0.636769	-0.0375873	-0.238025	-0.548871	-0.0411836	-0.373466	-0.787277
ABCB6_+_220083500.23-P1P2	-0.0125282	0.359515	0.694802	-0.0125282	0.218971	0.970886	-0.0125282	-0.164979	-0.340236	0.045913	-0.229553	-0.278993
ABCB6_+_220083584.23-P1P2	0.0692574	0.130036	0.478851	0.0692574	-0.259933	-0.783101	0.0692574	-0.411774	-0.567218	0.0828975	-0.151426	-0.0321314
ABCB6_+_220083613.23-P1P2	-0.0136703	-0.103227	-0.241491	-0.0136703	-0.107181	-0.54359	-0.0136703	0.0333624	0.0276234	-0.0477396	-0.337487	-0.740188
ABCB6_+_220083669.23-P1P2	0.00146243	0.0867847	0.187197	0.00146243	0.0617485	0.322677	0.00146243	-0.113339	-0.203437	-0.00653674	-0.0572186	-0.112864
ABCB6_-_220083181.23-P1P2	0.0117518	-0.0358007	-0.0288935	0.0117518	0.355844	1.74042	0.0117518	0.0731897	0.175141	0.0252552	0.223871	0.489388
ABCB6_-_220083194.23-P1P2	0.0634666	-0.232774	-0.270007	0.0634666	-0.155525	-0.33294	0.0634666	-0.198211	-0.184223	0.0460397	-0.288326	-0.385793
ABCB6_-_220083298.23-P1P2	-0.011639	0.185021	0.345719	-0.011639	-0.00128697	-0.0425281	-0.011639	0.114051	0.184441	0.0276584	0.0124919	0.110777
ABCB6_-_220083468.23-P1P2	-0.0186555	0.0150154	-0.0181583	-0.0186555	-0.127257	-0.664478	-0.0186555	0.0690033	0.0800016	0.0247861	0.10284	0.267394
ABCB6_-_220083604.23-P1P2	0.00820961	0.254349	0.545341	0.00820961	0.375036	1.80922	0.00820961	0.107957	0.230029	0.0257489	-0.0510493	-0.010465
ABCB7_+_74375695.23-P1P2	-0.0925523	0.055425	-0.159562	-0.0925523	0.133958	0.127375	-0.0925523	-0.337761	-0.893313	-0.110961	-0.0955667	-0.477598
ABCB7_+_74375720.23-P1P2	-0.144536	0.0988745	-0.228751	-0.144536	0.162178	-0.0347437	-0.144536	0.171361	-0.0898959	-0.170343	0.318353	0.10943
ABCB7_+_74375885.23-P1P2	-0.215262	-0.0510665	-0.744322	-0.215262	-0.0457998	-1.39448	-0.215262	0.183926	-0.269452	-0.279832		-0.607027
ABCB7_+_74375896.23-P1P2	-0.128088	0.114379	-0.14789	-0.128088	-0.0596794	-0.967981	-0.128088	-0.0560518	-0.468208	-0.141981	0.282266	0.123708
ABCB7_+_74376070.23-P1P2	-0.153303	0.0805125	-0.292208	-0.153303	-0.0295254	-0.970483	-0.153303	0.108124	-0.233397	-0.214034	0.135077	-0.348077
ABCB7_-_74375871.23-P1P2	-0.0615402	-7.74651e-05	-0.177921	-0.0615402	0.0682889	-0.00170523	-0.0615402	0.429076	0.630643	-0.0515814	-0.168743	-0.443371
ABCB7_-_74375964.23-P1P2	-0.26206		-0.92578	-0.26206		-0.779676	-0.26206	0.177162	-0.416476	-0.155183	-0.20719	-0.805962
ABCB7_-_74376019.23-P1P2	-0.226517	-0.17313	-1.02434	-0.226517	-0.0151318	-1.31603	-0.226517	-0.167918	-0.960143	-0.336769	0.270066	-0.448471
ABCB7_-_74376036.23-P1P2	-0.18982	0.143764	-0.274829	-0.18982	-0.0107392	-1.08916	-0.18982	0.020824	-0.501602	-0.194804	0.289189	-0.0128032
ABCB7_-_74376044.23-P1P2	-0.111108	-0.305594	-0.94331	-0.111108	0.217359	0.408556	-0.111108	0.156328	-0.0220465	-0.253554		-0.821964
ABCB8_+_150725531.23-P1P2	0.0959612	0.184352	0.668884	0.0959612	-0.282159	-0.735563	0.0959612	0.10744	0.481015	0.0989029	-0.530292	-0.67771
ABCB8_+_150725592.23-P1P2	-0.00338731	-0.142992	-0.290641	-0.00338731	0.261483	1.21891	-0.00338731	0.0770243	0.138849	-0.0120645	0.310398	0.541786
ABCB8_+_150725958.23-P1P2	0.00567984	0.113221	0.253208	0.00567984	0.00363177	0.0776979	0.00567984	-0.306791	-0.553318	0.0210041	-0.334843	-0.541287
ABCB8_+_150725965.23-P1P2	0.0179326	0.102871	0.269298	0.0179326	0.375192	1.86467	0.0179326	-0.014985	0.027894	0.00334294	0.056944	0.123176
ABCB8_-_150725551.23-P1P2	-0.031968	0.127217	0.167882	-0.031968	-0.161218	-0.896435	-0.031968	-0.371219	-0.781971	-0.155505		-0.279189
ABCB8_-_150725580.23-P1P2	-0.0136066	0.243809	0.458297	-0.0136066	0.343054	1.53855	-0.0136066	0.0406805	0.0415002	0.033053	-0.121464	-0.118227
ABCB8_-_150725890.23-P1P2	-0.0255849	0.0519469	0.0353939	-0.0255849	-0.216636	-1.11675	-0.0255849	-0.0890057	-0.235563	-0.0376319	0.0242	-0.0522067
ABCB8_-_150725928.23-P1P2	-0.0727361	-0.282513	-0.781052	-0.0727361	-0.152866	-1.08729	-0.0727361	-0.152789	-0.490295	-0.0596708	-0.142595	-0.418536
ABCB8_-_150725938.23-P1P2	-0.194234	0.356292	0.140297	-0.194234		-0.201898	-0.194234		-0.427687	-0.0732269		-0.299156
ABCB8_-_150725975.23-P1P2	0.0567433	0.0114265	0.202003	0.0567433	-0.213078	-0.636895	0.0567433	-0.0664426	0.0430397	-0.0161634	0.0051946	-0.0262473
ABCB9_+_123450501.23-P1	-0.0592317	-0.34167	-0.85958	-0.0592317	-0.0246643	-0.418505	-0.0592317	-0.073554	-0.303256	-0.0208565	-0.0775604	-0.19038
ABCB9_+_123450542.23-P1	0.0230842	0.177629	0.43554	0.0230842	0.101281	0.627169	0.0230842	-0.0215131	0.0304699	-0.0515071	0.122017	0.0869647
ABCB9_+_123450546.23-P1	-0.029959	-0.183185	-0.451805	-0.029959	-0.0720431	-0.472805	-0.029959	-0.241878	-0.534177	0.0129917	0.0315826	0.104176
ABCB9_+_123450566.23-P1	0.0243484	0.262781	0.611013	0.0243484	0.0220313	0.267853	0.0243484	0.0494281	0.166846	0.000898176	-0.314341	-0.56067
ABCB9_+_123450826.23-P1	-0.0439771	0.199622	0.277624	-0.0439771	0.0940808	0.216408	-0.0439771	0.0404181	-0.046191	-0.0296708	0.0495649	0.0165158
ABCB9_+_123450970.23-P1	0.0760235	0.148801	0.537085	0.0760235	0.0118629	0.511701	0.0760235	0.0214841	0.262927	0.0146415	-0.0930752	-0.118447
ABCB9_+_123465380.23-P2	0.0174605	-0.162214	-0.266515	0.0174605	-0.127062	-0.460291	0.0174605	0.125308	0.289056	0.0147263	-0.0920695	-0.116374
ABCB9_+_123465415.23-P2	0.0266647	0.0595411	0.208284	0.0266647	-0.117769	-0.365514	0.0266647	0.207921	0.47007	-0.0552866	-0.398134	-0.872068
ABCB9_+_123465727.23-P2	-0.0804095	-0.305226	-0.849983	-0.0804095	0.0442405	-0.219109	-0.0804095	-0.117055	-0.445462	0.0205217	-0.136178	-0.180433
ABCB9_+_123465780.23-P2	0.0421896	-0.389114	-0.649345	0.0421896	-0.0651671	-0.0349086	0.0421896	0.021388	0.165602	0.0444873	0.265028	0.618724
ABCB9_-_123450530.23-P1	-0.182422	-0.125677	-0.795688	-0.182422	0.28155	0.303956	-0.182422	0.186872	-0.16965	-0.123546	-0.120593	-0.558756
ABCB9_-_123450533.23-P1	-0.0300333	0.292934	0.507788	-0.0300333	0.234505	0.944181	-0.0300333	0.201716	0.295666	0.0192116	0.0499831	0.155285
ABCB9_-_123450551.23-P1	-0.0841288	0.194694	0.146597	-0.0841288	0.522794	1.97267	-0.0841288	0.0184909	-0.202506	-0.104703	0.603121	0.813948
ABCB9_-_123450999.23-P1	0.0750774	0.117063	0.470251	0.0750774	-0.138722	-0.189895	0.0750774	-0.246847	-0.241893	-0.0430438	-0.197515	-0.471727
ABCB9_-_123465296.23-P2	0.0142983	-0.0866522	-0.123726	0.0142983	-0.0804326	-0.262485	0.0142983	-0.0920391	-0.126725	0.00798254	0.0801109	0.178513
ABCB9_-_123465398.23-P2	-0.0302342	0.300568	0.522572	-0.0302342	-0.226534	-1.18868	-0.0302342	-0.130698	-0.326926	0.00234458	-0.184623	-0.320079
ABCB9_-_123465422.23-P2	0.012218	-0.134019	-0.225487	0.012218	0.0490988	0.324728	0.012218	-0.161438	-0.262558	-0.00503175	-0.0821365	-0.154046
ABCB9_-_123465699.23-P2	-0.0120855	0.261908	0.49937	-0.0120855	-0.210252	-1.01125	-0.0120855	0.0392223	0.0431389	0.0235616	0.163763	0.375014
ABCB9_-_123465738.23-P2	-0.101151	0.288104	0.283567	-0.101151	0.175258	0.26994	-0.101151	0.232342	0.148783	0.000360316	-0.229701	-0.407869
ABCB9_-_123465787.23-P2	0.029178	9.54223e-06	0.095853	0.029178	-0.0479166	-0.0283849	0.029178	0.292018	0.634649	-0.0656288	0.156945	0.110777
ABCC10_+_43395315.23-P1P2	-0.0232884	-0.149835	-0.364455	-0.0232884	-0.0710747	-0.430781	-0.0232884	0.043706	0.0193629	-0.0199061	0.0166757	-0.015881
ABCC10_+_43395533.23-P1P2	0.0209104	0.269584	0.614358	0.0209104	0.197055	1.05777	0.0209104	-0.516968	-0.902873	-0.00428788	-0.288128	-0.527518
ABCC10_+_43395536.23-P1P2	-0.105564	0.00909234	-0.292208	-0.105564	0.0194261	-0.475434	-0.105564	0.111202	-0.0905697	-0.201525		-0.64178
ABCC10_+_43395660.23-P1P2	-2.58902e-05	-0.206405	-0.408338	-2.58902e-05	-0.0413223	-0.162275	-2.58902e-05	0.231517	0.437588	-0.0473904	0.109798	0.076309
ABCC10_-_43395326.23-P1P2	0.0464019	-0.00970924	0.128207	0.0464019	-0.0943557	-0.14616	0.0464019	0.0985685	0.322118	-0.0324012	0.44967	0.738297
ABCC10_-_43395330.23-P1P2	-0.00998028	-0.279615	-0.585944	-0.00998028	-0.0339121	-0.184042	-0.00998028	-0.325195	-0.632719	-0.00858975	-0.121892	-0.236574
ABCC10_-_43395343.23-P1P2	-0.1492	0.0657132	-0.309668	-0.1492	-0.0457998	-1.02264	-0.1492	0.197675	-0.0540482	-0.103034	-0.230143	-0.700583
ABCC10_-_43395719.23-P1P2	0.166679	-0.328722	-0.15215	0.166679	-0.222942	-0.0637033	0.166679	-0.370077	-0.209476	0.129742	-0.50108	-0.537383
ABCC10_-_43395891.23-P1P2	-0.0433667	0.177482	0.234833	-0.0433667		-0.0620966	-0.0433667		-0.356374	0.0342562	-0.185058	-0.230778
ABCC10_-_43395984.23-P1P2	0.0189801	-0.200738	-0.339593	0.0189801	-0.192692	-0.755191	0.0189801	0.0600898	0.171382	-0.0502961	-0.0116559	-0.153335
ABCC11_+_48277846.23-P1	-0.0417135	0.209387	0.304138	-0.0417135	0.0904416	0.212322	-0.0417135	0.0442938	-0.0324395	-0.0191725	0.138397	0.208117
ABCC11_+_48278091.23-P1	0.0263032	-0.158926	-0.233218	0.0263032	-0.220006	-0.840268	0.0263032	0.226995	0.504724	-0.0414587	0.164591	0.192956
ABCC11_+_48278130.23-P1	0.0676202	-0.28461	-0.361978	0.0676202	-0.128769	-0.185848	0.0676202	-0.330319	-0.4195	-0.0520823	0.650223	1.04839
ABCC11_+_48278163.23-P1	-0.0776073	-0.155481	-0.539658	-0.0776073	-0.0236959	-0.517458	-0.0776073	0.0460289	-0.132251	-0.138212		-0.268138
ABCC11_+_48281001.23-P2	-0.00365416	0.135472	0.269915	-0.00365416	0.291464	1.35603	-0.00365416	-0.0223713	-0.0479077	0.00681756	0.0036756	0.035864
ABCC11_+_48281042.23-P2	0.02635	-0.00316745	0.0809195	0.02635	-0.300961	-1.21432	0.02635	-0.538302	-0.927175	-0.0358836	0.0228607	-0.0497126
ABCC11_+_48281160.23-P2	-0.0114796	0.0645207	0.103282	-0.0114796	0.165577	0.729909	-0.0114796	0.0722523	0.106685	0.0304064	0.139204	0.349562
ABCC11_+_48281175.23-P2	-0.0195351	0.185626	0.323126	-0.0195351	-0.169141	-0.863088	-0.0195351	0.0488885	0.0398372	-0.0312621	0.125511	0.150491
ABCC11_+_48281194.23-P2	-0.0180091	0.425291	0.810872	-0.0180091	-0.164495	-0.833017	-0.0180091	-0.0619992	-0.163276	0.0418512	-0.041219	0.0529189
ABCC11_+_48281284.23-P2	-0.0632211	-0.176269	-0.538177	-0.0632211	0.274738	0.943406	-0.0632211	-0.0505117	-0.271594	0.0307018	0.346136	0.727684
ABCC11_+_48281345.23-P2	0.063942	-0.206405		0.063942	-0.065133		0.063942	0.479904	1.08604		0.199038	0.404692
ABCC11_+_48281428.23-P2	-0.103432	0.202479	0.104076	-0.103432	0.189585	0.323344	-0.103432	0.313218	0.293568	0.0107805	0.174943	0.359314
ABCC11_-_48277852.23-P1	-0.0313255	-0.337051	-0.766106	-0.0313255	-0.136973	-0.780716	-0.0313255	-0.254081	-0.560936	-0.0155633	-0.476246	-0.902337
ABCC11_-_48278103.23-P1	-0.0474677	0.0969384	0.0600964	-0.0474677	0.0120026	-0.18275	-0.0474677	0.0236525	-0.0875852	-0.152187		-0.548964
ABCC11_-_48278122.23-P1	-0.0588415	0.0325362	-0.104036	-0.0588415	-0.052065	-0.543003	-0.0588415	0.193303	0.197211	-0.00354678	0.333594	0.608125
ABCC11_-_48278125.23-P1	-0.179289	0.706156	0.890665	-0.179289		0.122533	-0.179289		-0.384777	-0.0243021		-0.258012
ABCC11_-_48278197.23-P1	-0.00338731	0.464785	0.934587	-0.00338731	0.280985	1.30908	-0.00338731	-0.366027	-0.690194	0.0485487	0.387627	0.853719
ABCC11_-_48278200.23-P1	0.0273207	-0.197397	-0.307703	0.0273207	0.0527345	0.426547	0.0273207	0.0558621	0.187419	-0.263827	0.934229	0.968396
ABCC11_-_48280980.23-P2	-0.00821508	0.0914942	0.167504	-0.00821508	0.225962	1.02749	-0.00821508	0.110003	0.186697	-0.00658624	0.121563	0.212959
ABCC11_-_48281374.23-P2	-0.0495317	-0.177715	-0.499806	-0.0495317	-0.0823134	-0.630462	-0.0495317	-0.271764	-0.646298	0.0822081	-0.411781	-0.508768
ABCC12_+_48180281.23-ENST00000311303.3
ABCC12_+_48180331.23-ENST00000311303.3	0.0795869	-0.279615	-0.315817	0.0795869	-0.124704	-0.099695	0.0795869	-0.0927438	0.0594133	-0.024977		-0.249168
ABCC12_+_48180353.23-ENST00000311303.3	0.0116464	-0.0622602	-0.0825514	0.0116464	-0.0700427	-0.229371	0.0116464	-0.0603865	-0.075111	0.0514709	-0.0743877	0.019603
ABCC12_+_48180599.23-ENST00000311303.3	0.115815	-0.468496	-0.587325	0.115815	-0.231228	-0.388316	0.115815	-0.314524	-0.251566	-0.0705802	-0.198277	-0.550858
ABCC12_+_48180636.23-ENST00000311303.3	0.00866443	0.00787225	0.0498363	0.00866443	-0.126496	-0.507181	0.00866443	-0.222716	-0.387426	-0.0561683	0.0569117	-0.0448978
ABCC12_-_48180314.23-ENST00000311303.3	0.0687015	-0.108171	-0.00303076	0.0687015	-0.269499	-0.830462	0.0687015	0.0817801	0.35473	0.0509917	0.318311	0.734236
ABCC12_-_48180571.23-ENST00000311303.3	-0.0595352	0.124831	0.0799313	-0.0595352	0.460841	1.82465	-0.0595352	0.278528	0.354693	0.0328247	-0.286209	-0.419242
ABCC12_-_48180643.23-ENST00000311303.3	-0.0766977	0.111203	0.000698257	-0.0766977	0.253709	0.770316	-0.0766977	0.358543	0.455141	-0.0116711	0.0344403	0.0397576
ABCC12_-_48180648.23-ENST00000311303.3	0.0781284	0.0350072	0.314036	0.0781284	0.130665	1.07286	0.0781284	-0.0601325	0.116248	-0.0338493	0.26554	0.398495
ABCC12_-_48180679.23-ENST00000311303.3	-0.012097	0.0731921	0.118901	-0.012097	0.144242	0.627788	-0.012097	0.149761	0.249948	-0.0174133	-0.108565	-0.237188
ABCC1_+_16043482.23-P1P2	-0.000201716	-0.401261	-0.80168	-0.000201716	0.0869353	0.429768	-0.000201716	-0.148413	-0.273846	0.009565	0.219235	0.436637
ABCC1_+_16043647.23-P1P2	-0.0133723	-0.187708	-0.410897	-0.0133723	-0.161218	-0.791765	-0.0133723	-0.485659	-0.942719	-0.148358	-0.0980262	-0.587662
ABCC1_+_16043887.23-P1P2	0.034528	-0.165255	-0.22117	0.034528	-0.271161	-1.0305	0.034528	-0.421798	-0.685691	0.0623348	0.0376856	0.254611
ABCC1_+_16043921.23-P1P2	0.0592896	-0.286518	-0.390949	0.0592896	-0.192951	-0.529502	0.0592896	-0.210095	-0.218453	-0.0159037	-0.0381302	-0.104506
ABCC1_+_16043939.23-P1P2	0.0194414	0.256724	0.584002	0.0194414	0.0617311	0.423795	0.0194414	-0.358361	-0.610303	0.0592055	0.154644	0.459019
ABCC1_-_16043841.23-P1P2	-0.00796853	-0.427204	-0.877404	-0.00796853	-0.386332	-1.80223	-0.00796853	-0.337761	-0.650456	-0.0361924	0.219701	0.308303
ABCC1_-_16043871.23-P1P2	-0.0950887	-0.334225	-0.952713	-0.0950887	-0.169141	-1.28836	-0.0950887	0.0651409	-0.146682	-0.0574581	0.031139	-0.0955295
ABCC1_-_16043934.23-P1P2	-0.126703	-0.052769	-0.480668	-0.126703	0.0680128	-0.369764	-0.126703	0.236967	0.0840708	0.00388037	-0.0690482	-0.105022
ABCC1_-_16043999.23-P1P2	0.077693	-0.149468	-0.0591645	0.077693	-0.263933	-0.754115	0.077693	-0.10062	0.0392383	0.0277426	-0.014682	0.0614701
ABCC1_-_16044002.23-P1P2	0.0140216	-0.139558	-0.231213	0.0140216	-0.155866	-0.612827	0.0140216	-0.250671	-0.424354	0.0508755	0.0356008	0.218458
ABCC2_+_101542376.23-P1P2	-0.0250795	-0.0801276	-0.229333	-0.0250795	-0.0102885	-0.159801	-0.0250795	0.197036	0.301134	-0.0372789	0.14035	0.160559
ABCC2_+_101542515.23-P1P2	-0.0169953	-0.422255	-0.89465	-0.0169953	-0.0345611	-0.226529	-0.0169953	-0.174376	-0.370646	-0.0855661	0.0891748	-0.0690718
ABCC2_+_101542910.23-P1P2	0.0674116	0.444862	1.10795	0.0674116	-0.12675	-0.177686	0.0674116	0.145184	0.469669	-0.0328202	0.148553	0.188104
ABCC2_+_101542914.23-P1P2	-0.151099	0.576788	0.71489	-0.151099	0.318091	0.649222	-0.151099	0.0873064	-0.266022	-0.0597448	-0.044423	-0.239753
ABCC2_+_101542981.23-P1P2	0.0239831	-0.389782	-0.705601	0.0239831	-0.0728135	-0.172743	0.0239831	-0.387106	-0.651051	0.0333645	0.091907	0.27168
ABCC2_-_101542463.23-P1P2	0.0516506	-0.292682	-0.426413	0.0516506	-0.146375	-0.357142	0.0516506	-0.0450162	0.0685108	-0.0904296	0.102996	-0.0576038
ABCC2_-_101542705.23-P1P2	0.0564744	-0.0338157	0.109988	0.0564744	-0.295085	-1.01759	0.0564744	-0.0840143	0.00938713	0.0470074	-0.0359406	0.0770998
ABCC2_-_101542708.23-P1P2	0.0955536	0.0200091	0.336354	0.0955536	0.338113	2.13014	0.0955536	-0.293129	-0.269706	0.0612825	0.289819	0.711342
ABCC2_-_101542808.23-P1P2	-0.028023	-0.0114389	-0.0997395	-0.028023	-0.0204209	-0.22322	-0.028023	-0.212307	-0.473286	-0.0581693		-0.342878
ABCC2_-_101542903.23-P1P2	-0.00274808	0.0068534	0.0133632	-0.00274808	-0.116393	-0.524709	-0.00274808	-0.0748271	-0.143462	-0.00495342	0.29195	0.528226
ABCC3_+_48712245.23-P1P2	-0.0402134	0.0159614	-0.0812683	-0.0402134	-0.0442317	-0.401931	-0.0402134	-0.0284246	-0.164204	-0.00433683	0.0356122	0.0626006
ABCC3_+_48712248.23-P1P2	0.0404145	-0.27069	-0.415966	0.0404145	-0.242702	-0.865778	0.0404145	-0.0765097	-0.0226815	0.0521753	-0.175162	-0.162145
ABCC3_+_48712270.23-P1P2	-0.0219008	-0.0462195	-0.15139	-0.0219008	0.0254615	0.0233898	-0.0219008	0.0587141	0.0514304	0.0351974	-0.0599685	-5.14123e-05
ABCC3_+_48712294.23-P1P2	-0.0395027	0.358653	0.611713	-0.0395027	-0.138487	-0.833746	-0.0395027	0.259686	0.376953	-0.00810749	0.356624	0.637238
ABCC3_+_48712450.23-P1P2	-0.143766	-0.174015	-0.77655	-0.143766	-0.0387775	-0.959579	-0.143766	-0.0384906	-0.48036	-0.104703	-0.210642	-0.66974
ABCC3_+_48712559.23-P1P2	0.034285	-0.283352	-0.459977	0.034285	-0.0734668	-0.117777	0.034285	0.166374	0.414207	0.00363106	0.0656399	0.139844
ABCC3_+_48712662.23-P1P2	-0.0238778	0.519858	0.983811	-0.0238778	-0.0198429	-0.197215	-0.0238778	0.0825271	0.0903132	0.0217871	0.129676	0.307856
ABCC3_+_48712738.23-P1P2	0.0280429	0.0887416	0.271306	0.0280429	0.11275	0.708109	0.0280429	0.123108	0.315324	-0.0413317	0.0267679	-0.0579704
ABCC3_-_48712163.23-P1P2	0.0320712	-0.306538	-0.513395	0.0320712	0.122615	0.776395	0.0320712	0.0670976	0.222083	0.0188626	-0.0974303	-0.114471
ABCC3_-_48712673.23-P1P2	0.0501932	-0.0411601	0.0762383	0.0501932	-0.214397	-0.679861	0.0501932	0.0308573	0.206301	-0.05681	0.281032	0.361916
ABCC4_+_95953430.23-P1P2	-0.0111132	-0.259827	-0.54947	-0.0111132	0.240856	1.08004	-0.0111132	-0.0456035	-0.112797	0.00660131	0.120949	0.249071
ABCC4_+_95953641.23-P1P2	-0.00308627	-0.14392	-0.291602	-0.00308627	-0.0116253	-0.0421889	-0.00308627	0.0537309	0.0961263	-0.0453472	-0.144225	-0.381068
ABCC4_+_95953668.23-P1P2	-0.00299141	-0.212352	-0.429269	-0.00299141	0.292142	1.36289	-0.00299141	-0.256208	-0.483562	0.0021775	-0.397666	-0.708979
ABCC4_+_95953676.23-P1P2	0.0300579	-0.0684802	-0.0395629	0.0300579	0.0105833	0.247057	0.0300579	0.358079	0.760791	-0.0290954	0.19454	0.282466
ABCC4_+_95953681.23-P1P2	0.0453434	-0.0328619	0.0783405	0.0453434	-0.204839	-0.662967	0.0453434	0.0584814	0.244067	0.0466612	-0.0449525	0.0596914
ABCC4_+_95953695.23-P1P2	-0.051294	-0.30078	-0.753209	-0.051294	0.0277701	-0.131381	-0.051294	-0.128079	-0.382492	0.0134667	-0.0177288	0.0156107
ABCC4_-_95953458.23-P1P2	0.0305148	0.0344562	0.169326	0.0305148	-0.138116	-0.437921	0.0305148	-0.0778623	-0.0536366	0.0194952	-0.0234488	0.0222016
ABCC4_-_95953561.23-P1P2	0.0315295	-0.085721	-0.0698808	0.0315295	0.128384	0.800024	0.0315295	0.142331	0.361306	-0.0298509	0.0172346	-0.0429387
ABCC4_-_95953614.23-P1P2	0.0246453	-0.267644	-0.457385	0.0246453	-0.187563	-0.699588	0.0246453	-0.0389981	0.00223371	0.0112513	0.384388	0.742514
ABCC4_-_95953652.23-P1P2	-0.0781546	0.242997	0.261988	-0.0781546	0.108971	0.0928812	-0.0781546	-0.149376	-0.499467	0.0709156	-0.0458094	0.126605
ABCC5_+_183735202.23-P1P2	0.00334076	0.0890088	0.197345	0.00334076	-0.088076	-0.359503	0.00334076	0.0811994	0.165979	-0.0441075	-0.0216457	-0.154077
ABCC5_+_183735246.23-P1P2	-0.0292401	-0.210306	-0.504308	-0.0292401	0.0559397	0.123003	-0.0292401	-0.0711834	-0.212708	0.00935992	0.0359499	0.101886
ABCC5_+_183735252.23-P1P2	0.0217009	-0.257888	-0.446596	0.0217009	0.0758252	0.501681	0.0217009	-0.363297	-0.613053	-0.00354262	-0.219926	-0.401066
ABCC5_+_183735285.23-P1P2	-0.00338731	0.158188	0.316514	-0.00338731	0.232682	1.08574	-0.00338731	0.201079	0.370982	-0.0197784	0.338269	0.570824
ABCC5_+_183735648.23-P1P2	-0.0823068	0.151221	0.0644529	-0.0823068	0.2794	0.857534	-0.0823068	0.337745	0.400118	-0.0334196	-0.0316349	-0.142115
ABCC5_+_183735692.23-P1P2	-0.00249688	-0.456732	-0.920427	-0.00249688	0.0670961	0.325117	-0.00249688	-0.0219746	-0.0438426	-0.0355154	-0.377447	-0.778532
ABCC5_-_183735259.23-P1P2	0.072616	-0.374196	-0.527508	0.072616	-0.38133	-1.32551	0.072616	-0.106433	0.0137837	0.0732994	-0.0556413	0.115409
ABCC5_-_183735312.23-P1P2	-0.00971454	0.0068026	-0.00774941	-0.00971454	0.156181	0.696401	-0.00971454	-0.144954	-0.294687	-0.0226673	0.09067	0.111233
ABCC5_-_183735467.23-P1P2	0.0615879	-0.354462	-0.520987	0.0615879	-0.0506479	0.141412	0.0615879	-0.0927106	0.00779635	0.0422317	-0.003462	0.122833
ABCC5_-_183735588.23-P1P2	0.0262836	-0.226271	-0.369038	0.0262836	0.239901	1.28612	0.0262836	-0.00175458	0.0766283	-0.0275288	-0.167147	-0.372556
ABCC6_+_16316894.23-ENST00000205557.7	-0.0205602	-0.395365	-0.851196	-0.0205602	-0.182377	-0.930062	-0.0205602	0.1077	0.146943	-0.0445569	-0.102962	-0.303606
ABCC6_+_16316916.23-ENST00000205557.7
ABCC6_+_16317287.23-ENST00000205557.7	-0.157417		-0.361221	-0.157417		-0.591922	-0.157417		-0.722222	0.0100617	0.520644	0.987583
ABCC6_+_16317296.23-ENST00000205557.7	0.0127837	-0.200495	-0.357791	0.0127837	0.146	0.775962	0.0127837	-0.230797	-0.39072	0.0273497	-0.155821	-0.196971
ABCC6_-_16316877.23-ENST00000205557.7	-0.10784	-0.140286	-0.600207	-0.10784	0.0546926	-0.325179	-0.10784	0.192821	0.0556239	-0.107024	-0.0208886	-0.330326
ABCC6_-_16317049.23-ENST00000205557.7	-0.00449549	0.366029	0.732161	-0.00449549	0.240805	1.11705	-0.00449549	-0.406716	-0.769514	-0.00827029	0.329322	0.587
ABCC6_-_16317052.23-ENST00000205557.7	0.00544311	-0.324887	-0.630693	0.00544311	-0.0289101	-0.0741003	0.00544311	-0.396517	-0.721894	-0.134771	-0.00585978	-0.38126
ABCC6_-_16317235.23-ENST00000205557.7	0.00215818	-0.0119827	-0.00981182	0.00215818	0.171601	0.834524	0.00215818	0.042558	0.0902774	-0.0565457	0.164446	0.150097
ABCC6_-_16317247.23-ENST00000205557.7	-0.00368274	0.236212	0.472911	-0.00368274	-0.0512974	-0.228981	-0.00368274	-0.160912	-0.307229	0.0335023	-0.0847325	-0.0499881
ABCC6_-_16317344.23-ENST00000205557.7	-0.0665328	-0.079223	-0.352529	-0.0665328	-0.179591	-1.17595	-0.0665328	-0.0240465	-0.23158	-0.0794255	-0.184852	-0.551354
ABCC8_+_17497824.23-P1P2	-0.0242008	-0.0631148	-0.192386	-0.0242008	0.288555	1.22693	-0.0242008	0.173909	0.26038	-0.0196979	-0.108778	-0.244027
ABCC8_+_17497953.23-P1P2	0.000174641	0.211804	0.435341	0.000174641	-0.0891711	-0.382388	0.000174641	0.215393	0.407993	-0.0220937	-0.0357377	-0.11762
ABCC8_+_17498249.23-P1P2	0.0884679	-0.0295315	0.215114	0.0884679	-0.0529855	0.281904	0.0884679	-0.373764	-0.440936	0.0262227	0.0206362	0.121573
ABCC8_+_17498387.23-P1P2	-0.0729363	0.188498	0.167862	-0.0729363	-0.140978	-1.03345	-0.0729363	-0.0291397	-0.259497	-0.0392336	0.114052	0.107094
ABCC8_+_17498394.23-P1P2	-0.0690899	0.326892	0.458452	-0.0690899	-0.0520746	-0.600733	-0.0690899	0.184206	0.150762	-0.0665545	-0.0164998	-0.208068
ABCC8_-_17497979.23-P1P2	-0.00551275	-0.0902851	-0.190798	-0.00551275	0.166496	0.767742	-0.00551275	-0.0121738	-0.0341624	0.00473173	-0.398806	-0.703848
ABCC8_-_17497997.23-P1P2	-0.0561366	-0.328443	-0.823581	-0.0561366	-0.0824727	-0.668376	-0.0561366	0.252203	0.315191	-0.0074237	-0.384823	-0.712671
ABCC8_-_17498066.23-P1P2	-0.0740523	-0.268317	-0.756405	-0.0740523	-0.0247193	-0.50218	-0.0740523	-0.39255	-0.942719	-0.110573	-0.136349	-0.550858
ABCC8_-_17498220.23-P1P2	-0.103311	-0.0998353	-0.505003	-0.103311	0.0433747	-0.352021	-0.103311	0.279636	0.231075	0.00908763	0.040479	0.109375
ABCC8_-_17498282.23-P1P2	-0.0239827	0.0523654	0.0410697	-0.0239827	0.220994	0.915767	-0.0239827	-0.157457	-0.359049	0.0106248	0.13467	0.285447
ABCC9_+_22093672.23-P1P2	0.0127013	-0.0759285	-0.106924	0.0127013	0.234266	1.18362	0.0127013	0.0606395	0.154383	0.0228202	-0.0688843	-0.051251
ABCC9_+_22093678.23-P1P2	-0.0317011	-0.510677	-1.11725	-0.0317011	-0.177492	-0.970182	-0.0317011	-0.0838666	-0.243507	0.0281989	0.00636382	0.10113
ABCC9_+_22093937.23-P1P2	-0.0396401	0.121371	0.132957	-0.0396401	0.195962	0.711894	-0.0396401	-0.022883	-0.152189	-0.0481319	0.0983138	0.0532767
ABCC9_+_22093941.23-P1P2	-0.0402402	0.203784	0.297286	-0.0402402	-0.0860273	-0.595335	-0.0402402	0.113743	0.101745	0.0125875	-0.0289474	-0.00732573
ABCC9_+_22094148.23-P1P2	0.0245165	0.133445	0.350789	0.0245165	-0.10436	-0.315603	0.0245165	-0.0955709	-0.103996	-0.0547253	0.516332	0.796811
ABCC9_+_22094152.23-P1P2	0.00853975	-0.152554	-0.273946	0.00853975	0.155567	0.796309	0.00853975	-0.145947	-0.244133	-0.0426085	-0.396844	-0.833923
ABCC9_+_22094309.23-P1P2	-0.105431	0.141068	-0.0257544	-0.105431	0.0658504	-0.260029	-0.105431	0.0486584	-0.207219	-0.148692	0.283709	0.107392
ABCC9_-_22093906.23-P1P2	0.0595561	-0.466303	-0.752575	0.0595561	-0.191338	-0.520543	0.0595561	-0.441174	-0.650086	0.0828399	-0.161512	-0.0506837
ABCC9_-_22094032.23-P1P2	0.0551419	-0.0600955	0.0529911	0.0551419	-0.175392	-0.47166	0.0551419	0.122293	0.391607	0.0596351	-0.0169187	0.147433
ABCC9_-_22094122.23-P1P2	0.0529329	0.158454	0.486906	0.0529329	0.490636	2.59546	0.0529329	0.115285	0.37215	0.045337	0.0815553	0.286608
ABCD1_+_152990414.23-P1P2	0.020312	-0.212259	-0.358803	0.020312	0.0850773	0.536643	0.020312	-0.277471	-0.456441	0.0631458	-0.0843587	0.0343843
ABCD1_+_152990694.23-P1P2	-0.0609514	-0.0794518	-0.336157	-0.0609514	0.264857	0.910495	-0.0609514	0.0918901	0.00138717	-0.103411	0.401955	0.450823
ABCD1_+_152990711.23-P1P2	0.0412002	0.293965	0.7247	0.0412002	0.348631	1.87283	0.0412002	-0.0296952	0.0671742	-0.0134249	0.0603954	0.0821286
ABCD1_-_152990333.23-P1P2	-0.053621	0.0301166	-0.0931684	-0.053621	0.364607	1.41297	-0.053621	-0.00520448	-0.15925	-0.130784	0.376944	0.327941
ABCD1_-_152990338.23-P1P2	-0.0496555	-0.334225	-0.81569	-0.0496555	0.419195	1.6877	-0.0496555	-0.246253	-0.598917	-0.0642787	0.192604	0.179604
ABCD1_-_152990342.23-P1P2	-0.0771018	0.11162	0.000320206	-0.0771018	0.0920476	0.0205575	-0.0771018	0.0447389	-0.133214	-0.121967	0.215945	0.0592917
ABCD1_-_152990379.23-P1P2	-0.0231376	0.0779982	0.0952921	-0.0231376	-0.248951	-1.25239	-0.0231376	-0.0180921	-0.0958413	-0.0232818	-0.0168641	-0.0865627
ABCD1_-_152990498.23-P1P2	-0.0688993	-0.0985125	-0.398552	-0.0688993	-0.0040385	-0.377552	-0.0688993	-0.076607	-0.336727	-0.00420593	0.0975077	0.175821
ABCD1_-_152990703.23-P1P2	-0.056364	0.148989	0.138196	-0.056364	0.0584323	-0.0181444	-0.056364	-0.0592006	-0.268164	-0.0648832	0.315208	0.401434
ABCD1_-_152990727.23-P1P2	-0.0119931	0.14523	0.264437	-0.0119931	-0.0478457	-0.259798	-0.0119931	-0.292277	-0.576901	-0.0550554	-0.408154	-0.889685
ABCD2_+_40013099.23-P1P2	0.0327328	0.16327	0.435694	0.0327328	-0.111731	-0.30344	0.0327328	0.0505308	0.192982	0.0504938	-0.29602	-0.387246
ABCD2_+_40013295.23-P1P2	-0.0622254	0.0818974	-0.014733	-0.0622254	0.0623934	-0.032821	-0.0622254	0.0446742	-0.0906215	0.00859969	0.0922989	0.202477
ABCD2_+_40013504.23-P1P2	0.034307	0.209608	0.533855	0.034307	0.231053	1.29037	0.034307	0.192016	0.462251	-0.00485568	0.190552	0.34363
ABCD2_+_40013514.23-P1P2	0.0536697	-0.277067	-0.388844	0.0536697	0.0117373	0.385297	0.0536697	-0.16326	-0.146952	0.0786222	-0.180823	-0.0977992
ABCD2_+_40013594.23-P1P2	0.0178437	0.00776752	0.0773091	0.0178437	0.18812	0.999194	0.0178437	-0.0953837	-0.122804	-0.0123143	0.0903853	0.139943
ABCD2_-_40013191.23-P1P2	-0.0846583	0.014622	-0.21801	-0.0846583	-0.130762	-1.0522	-0.0846583	0.264505	0.256319	-0.040636	0.113979	0.103002
ABCD2_-_40013313.23-P1P2	0.0271635	0.30122	0.696993	0.0271635	0.177217	1.00124	0.0271635	-0.196522	-0.285297	0.0197545	0.0955656	0.239926
ABCD2_-_40013342.23-P1P2	-0.0651483	0.209363	0.233412	-0.0651483	0.0553176	-0.0819906	-0.0651483	0.00665487	-0.170156	0.00382507	0.255313	0.486212
ABCD2_-_40013373.23-P1P2					0.455366	1.82579				0.114512	0.0313848
ABCD2_-_40013610.23-P1P2	0.0133378	0.0177238	0.0837906	0.0133378	-0.148282	-0.581613	0.0133378	0.199393	0.415849	0.0397883	-0.255306	-0.343238
ABCD3_+_94884002.23-P1P2	-0.00701287	-0.0734895	-0.161464	-0.00701287	0.296915	1.36232	-0.00701287	0.00341343	-0.00930248	-0.013827	0.138711	0.223781
ABCD3_+_94884009.23-P1P2	0.00845215	0.193303	0.423008	0.00845215	0.18687	0.940552	0.00845215	0.0829149	0.183865	-0.0128992	-0.216745	-0.421682
ABCD3_+_94884032.23-P1P2	0.0095124	0.0589235	0.155309	0.0095124	0.00395052	0.100744	0.0095124	0.0868305	0.194236	-0.0350341	-0.0481189	-0.176728
ABCD3_+_94884210.23-P1P2	-0.0993788	0.179247	0.0694651	-0.0993788	-0.139066	-1.17345	-0.0993788	0.271675	0.22747	0.0292616	-0.185654	-0.245965
ABCD3_+_94884219.23-P1P2	0.0479161	0.283019	0.72289	0.0479161	-0.222883	-0.731916	0.0479161	0.249967	0.609765	-0.0078955	0.193845	0.341051
ABCD3_+_94884473.23-P1P2	-0.150883	-7.74651e-05	-0.44737	-0.150883	-0.0832141	-1.2051	-0.150883	-0.181391	-0.768192	-0.0269898	0.103227	0.121925
ABCD3_-_94883974.23-P1P2	-0.0226983	-0.124812	-0.312232	-0.0226983	0.0751689	0.248736	-0.0226983	0.0444989	0.0225408	-0.0356106	0.0220556	-0.0504099
ABCD3_-_94884061.23-P1P2	0.0549912	-0.362021	-0.55612	0.0549912	-0.145844	-0.335882	0.0549912	-0.200877	-0.213546	0.0182005	0.0768918	0.201492
ABCD3_-_94884365.23-P1P2	-0.0235704	-0.459368	-0.989298	-0.0235704	-0.0929228	-0.533389	-0.0235704	0.301925	0.501736	-0.0234231	-0.477949	-0.927633
ABCD3_-_94884436.23-P1P2	-0.0942686	-0.138521	-0.555716	-0.0942686	-0.0887995	-0.912263	-0.0942686	-0.1741	-0.591996	-0.185755	0.391755	0.199748
ABCD4_+_74769232.23-P1P2	0.00378331	-0.281712	-0.548662	0.00378331	-0.114047	-0.477096	0.00378331	0.124175	0.247666	-0.153365	0.415113	0.33378
ABCD4_+_74769429.23-P1P2	-0.0230594	0.386677	0.717797	-0.0230594	-0.0679407	-0.415001	-0.0230594	0.283396	0.468532	0.02552	-0.292669	-0.451644
ABCD4_+_74769611.23-P1P2	0.0251727	-0.169843	-0.258635	0.0251727	-0.0914385	-0.252165	0.0251727	-0.0187577	0.0416221	-0.0287116	-0.494196	-0.972185
ABCD4_+_74769625.23-P1P2	-0.000869644	-0.127802	-0.252426	-0.000869644	-0.122146	-0.540733	-0.000869644	-0.159439	-0.296396	0.0267621	0.121572	0.307126
ABCD4_+_74769649.23-P1P2	-0.00424176	0.12523	0.247495	-0.00424176	-0.0652375	-0.296583	-0.00424176	-0.200195	-0.38234	0.0610326	-0.095009	0.0090003
ABCD4_-_74769174.23-P1P2	0.0180935	0.332969	0.733641	0.0180935	-0.0201909	0.0374206	0.0180935	-0.00907177	0.0394208	0.0104161	0.16805	0.345719
ABCD4_-_74769631.23-P1P2	-0.0596603	0.0389991	-0.0934764	-0.0596603	-0.197817	-1.22153	-0.0596603	-0.000231678	-0.167285	-0.01774	0.242353	0.4017
ABCD4_-_74769666.23-P1P2	-0.0480256	-0.110878	-0.360526	-0.0480256	-0.116573	-0.780391	-0.0480256	-0.203863	-0.514917	0.00136774	-0.342157	-0.610059
ABCD4_-_74769682.23-P1P2	-0.0104535	0.22872	0.437388	-0.0104535	0.330892	1.50006	-0.0104535	0.0102276	-0.00643042	0.0266966	0.0793003	0.22987
ABCD4_-_74769729.23-P1P2	-0.0102108	0.031075	0.0396851	-0.0102108	-0.0811233	-0.403633	-0.0102108	0.124448	0.207997	0.0507434	0.00252157	0.157773
ABCE1_+_146019317.23-P1P2	-0.339477	0.194591	-0.623719	-0.339477	0.252245	-0.71556	-0.339477	0.094565	-0.793313	-0.239687	0.218148	-0.269042
ABCE1_+_146019463.23-P1P2	-0.099681	-0.0324302	-0.358171	-0.099681	0.250153	0.624506	-0.099681	0.175782	0.0471662	-0.0829339	-0.042626	-0.301946
ABCE1_+_146019466.23-P1P2	-0.0292212	0.105252	0.131886	-0.0292212	0.0196209	-0.0448198	-0.0292212	0.166826	0.232712	-0.026562	0.0671751	0.0574004
ABCE1_+_146019482.23-P1P2	-0.0619427	0.473926	0.776417	-0.0619427	0.0139427	-0.255254	-0.0619427	-0.231225	-0.606075	-0.0721723	-0.103424	-0.382412
ABCE1_+_146019651.23-P1P2	-0.247104	0.230278	-0.273189	-0.247104		-1.09436	-0.247104	0.154326	-0.416265	-0.341211	0.364846	-0.288204
ABCE1_+_146019792.23-P1P2	-0.0221203	-0.434092	-0.93397	-0.0221203	-0.0518861	-0.335482	-0.0221203	-0.372551	-0.756189	-0.129359	-0.168743	-0.662957
ABCE1_+_146019842.23-P1P2	0.0557639	-0.365228	-0.560255	0.0557639	-0.328604	-1.17657	0.0557639	0.129148	0.406218	-0.0323694	-0.431127	-0.867522
ABCE1_-_146019439.23-P1P2	-0.249926	0.110465	-0.523231	-0.249926	0.215213	-0.382732	-0.249926	0.279664	-0.189834	-0.1866	0.275914	-0.0138441
ABCE1_-_146019502.23-P1P2	-0.277047		-0.749095	-0.277047		-0.908339	-0.277047		-0.788043	-0.308985		-0.644679
ABCE1_-_146019516.23-P1P2	-0.137146		-0.517141	-0.137146		-0.475434	-0.137146		-0.567218	-0.233988		-0.432943
ABCF1_+_30539238.23-P1	-0.134827	0.0689762	-0.259742	-0.134827	0.0842424	-0.340452	-0.134827	0.163592	-0.0765566	-0.181196	0.212448	-0.114301
ABCF1_+_30539434.23-P1	0.00264498	0.0751842	0.167377	0.00264498	-0.186646	-0.819183	0.00264498	-0.0430778	-0.0685677	-0.00236758	0.032414	0.0623293
ABCF1_+_30539469.23-P1	-0.0153684	0.0189987	-0.000214869	-0.0153684	0.188023	0.811806	-0.0153684	0.255235	0.437919	-0.0357907	0.0155676	-0.0627475
ABCF1_+_30539647.23-P1	-0.0342726	-0.00224214	-0.100048	-0.0342726	0.474054	2.02794	-0.0342726	-0.0709456	-0.226712	-0.0718597	0.401659	0.53936
ABCF1_+_30539664.23-P1	0.00156766	0.0334251	0.0799455	0.00156766	-0.000543828	0.0352447	0.00156766	-0.242154	-0.444175	0.0134636	-0.0603379	-0.0620849
ABCF1_+_30546312.23-P2	0.0756413	0.141933	0.522088	0.0756413	-0.277233	-0.827163	0.0756413	-0.275408	-0.293719	-0.00359334	-0.0793006	-0.144814
ABCF1_+_30546315.23-P2	-0.0345741	0.0162416	-0.0636956	-0.0345741	-0.12441	-0.740913	-0.0345741	0.00657663	-0.0825177	-0.0290364	0.117982	0.143048
ABCF1_+_30546387.23-P2	-0.0285516	0.035164	-0.00738617	-0.0285516	0.411366	1.77028	-0.0285516	0.0658374	0.0456638	0.0501041	0.124413	0.378207
ABCF1_+_30546397.23-P2	-0.170883	0.508255	0.517067	-0.170883	0.0670961	-0.622678	-0.170883	0.0224005	-0.444279	0.045649	-0.0984283	-0.0406659
ABCF1_+_30546405.23-P2	-0.0344436	0.0519469	0.00867705	-0.0344436	0.121278	0.395824	-0.0344436	-0.270622	-0.60084	-0.0462702	0.508965	0.80725
ABCF1_-_30539219.23-P1	0.01298	-0.253663	-0.464381	0.01298	-0.305356	-1.3099	0.01298	0.0549452	0.144528	-0.0302575	-0.154292	-0.356822
ABCF1_-_30539232.23-P1	0.0484746	-0.181874	-0.212612	0.0484746	0.198153	1.218	0.0484746	-0.16965	-0.173825	-0.0132669	0.36444	0.636923
ABCF1_-_30539559.23-P1	-0.0361417	-0.104381	-0.311588	-0.0361417	0.166202	0.593984	-0.0361417	-0.261504	-0.588654	0.0321135	0.135123	0.346941
ABCF1_-_30539602.23-P1	-0.131624	-0.0761293	-0.542601	-0.131624	-0.0259891	-0.832106	-0.131624	0.402878	0.380397	-0.100837	-0.0798322	-0.420325
ABCF1_-_30539728.23-P1	-0.00243685	0.24072	0.485757	-0.00243685	0.257386	1.20531	-0.00243685	-0.34668	-0.651262	0.00495965	-0.384823	-0.67771
ABCF1_-_30546344.23-P2	-0.0178767	0.0807037	0.116613	-0.0178767	0.318291	1.40001	-0.0178767	0.050727	0.0480388	0.0282321	0.0978606	0.268045
ABCF1_-_30546354.23-P2	0.0258696	0.0843228	0.255843	0.0258696	0.248209	1.32221	0.0258696	-0.220324	-0.33355	0.00819765	0.317465	0.611874
ABCF1_-_30546366.23-P2	-0.057624	0.26121	0.360623	-0.057624	0.328232	1.22225	-0.057624	-0.209408	-0.552853	-0.0385092	0.0187048	-0.0647027
ABCF1_-_30546413.23-P2	0.0153329	0.170073	0.396932	0.0153329	-0.180483	-0.719269	0.0153329	-0.00758422	0.034278	-0.00241826	0.473862	0.867053
ABCF1_-_30546502.23-P2	-0.0507636	-0.078712	-0.30394	-0.0507636	-0.114862	-0.787894	-0.0507636	0.000560501	-0.140259	-0.0296886	0.349661	0.563614
ABCF2_+_150923872.23-P1P2	0.0153009	-0.289429	-0.529483	0.0153009	-0.0457998	-0.0967076	0.0153009	0.133396	0.297991	-0.00618531	0.0930705	0.162142
ABCF2_+_150923902.23-P1P2	0.00563378	0.386308	0.803591	0.00563378	0.219166	1.07402	0.00563378	0.130138	0.264136	0.12167	-0.35893	-0.300999
ABCF2_+_150923936.23-P1P2	0.0351636	-0.041568	0.0300883	0.0351636	0.0854142	0.621796	0.0351636	-0.12586	-0.130102	0.071738	0.147602	0.481564
ABCF2_+_150923959.23-P1P2	0.0749381	0.101201	0.437856	0.0749381	-0.060996	0.16871	0.0749381	0.238342	0.665597	-0.00923745	-0.211579	-0.401925
ABCF2_+_150924059.23-P1P2	-0.0389537	-0.0178576	-0.145645	-0.0389537	-0.0369709	-0.361269	-0.0389537	0.214526	0.294025	-0.0732269	0.183894	0.13846
ABCF2_+_150924236.23-P1P2	0.0503635	0.159181	0.480622	0.0503635	0.154539	1.02697	0.0503635	0.0215401	0.189356	0.00740044	-0.315895	-0.545146
ABCF2_+_150924287.23-P1P2	0.0377867	0.0714365	0.265807	0.0377867	0.0205079	0.33645	0.0377867	0.219609	0.523875	0.0271097	-0.168743	-0.221207
ABCF2_+_150924296.23-P1P2	-0.0360083	0.217989	0.338685	-0.0360083	0.536609	2.30741	-0.0360083	-0.0294207	-0.153994	-0.026792	-0.117925	-0.280732
ABCF2_+_150924331.23-P1P2	0.0113835	0.178444	0.401895	0.0113835	0.0495909	0.322306	0.0113835	0.32315	0.641812	-0.0878003	0.0578148	-0.132556
ABCF2_-_150923882.23-P1P2	0.0686051	0.205318	0.628646	0.0686051	0.143464	1.07843	0.0686051	-0.147602	-0.0747693	0.118588	0.099832	0.526736
ABCF3_+_183904140.23-P1P2	-0.0165371	0.0893061	0.137994	-0.0165371	0.419737	1.87662	-0.0165371	0.0401382	0.0320711	0.0428599	0.325314	0.724047
ABCF3_-_183903980.23-P1P2	0.0118105	0.281851	0.611643	0.0118105	0.290431	1.4383	0.0118105	0.152051	0.322876	-0.0185012	0.0683638	0.0823255
ABCF3_-_183903991.23-P1P2	0.0339911	0.200458	0.514455	0.0339911	0.127625	0.810367	0.0339911	0.0988239	0.286962	0.0575861	0.122374	0.395613
ABCF3_-_183904021.23-P1P2	0.0528167	-0.384029	-0.607044	0.0528167	0.00613616	0.354597	0.0528167	0.0267212	0.206095	-0.0335437	-0.0654748	-0.204164
ABCF3_-_183904044.23-P1P2	0.043168	0.24177	0.625413	0.043168	0.232896	1.34877	0.043168	0.0521902	0.226049	0.0164873	0.0879592	0.216834
ABCF3_-_183904344.23-P1P2	-0.068204	0.191984	0.189162	-0.068204	-0.00559543	-0.380837	-0.068204	0.140104	0.0707812	-0.0475315	-0.118709	-0.340713
ABCF3_-_183904356.23-P1P2	0.042578	0.0444426	0.225839	0.042578	-0.0682127	-0.0468048	0.042578	-0.168155	-0.187958	0.0471813	0.0999965	0.325437
ABCF3_-_183904380.23-P1P2	-0.00820814	0.113793	0.212478	-0.00820814	0.259037	1.18046	-0.00820814	-0.0929051	-0.192967	-0.0227334	-0.0751435	-0.191272
ABCF3_-_183904399.23-P1P2	0.039672	0.182552	0.495491	0.039672	-0.0477569	0.0314212	0.039672	0.0944913	0.295166	0.0288472	-0.338471	-0.525759
ABCF3_-_183904495.23-P1P2	0.00750948	-0.130957	-0.233515	0.00750948	-0.301696	-1.32377	0.00750948	-0.402205	-0.726604	-0.0049499	-0.330003	-0.605735
ABCG1_+_43639503.23-P1P2	-0.100866	0.355741	0.420776	-0.100866	0.206442	0.415728	-0.100866	0.107301	-0.0843796	-0.117886	0.084917	-0.168082
ABCG1_+_43639544.23-P1P2	-0.0145493	0.207222	0.381699	-0.0145493	0.0794598	0.314445	-0.0145493	0.0483172	0.0530833	0.0215149	-0.0150697	0.0431809
ABCG1_+_43639681.23-P1P2	-0.0317011	-0.224159	-0.539658	-0.0317011	-0.0795795	-0.517458	-0.0317011	0.167939	0.227674	-0.0760879	-0.136349	-0.453497
ABCG1_-_43639282.23-P1P2	-0.00962748	-0.0559123	-0.133915	-0.00962748	0.0931453	0.405427	-0.00962748	-0.0683864	-0.151162	-0.0145927	0.0410462	0.0435533
ABCG1_-_43639541.23-P1P2	-0.034469	-0.453914	-1.01117	-0.034469	0.201621	0.767169	-0.034469	0.0806782	0.0564441	0.0431149	0.0263078	0.179604
ABCG1_-_43639554.23-P1P2	-0.0247726	0.414701	0.769125	-0.0247726	0.00030663	-0.109085	-0.0247726	-0.0845395	-0.224873	0.0241453	-0.0603379	-0.0319277
ABCG1_-_43639626.23-P1P2	0.0439903	0.27048	0.685771	0.0439903	0.11372	0.802358	0.0439903	0.0240255	0.175708	0.0241096	0.0337036	0.139432
ABCG1_-_43639644.23-P1P2	-0.0218174	-0.156094	-0.372637	-0.0218174	0.153774	0.617145	-0.0218174	0.159869	0.240953	-0.0231649	0.412581	0.696751
ABCG1_-_43639647.23-P1P2	0.0244468	0.0227954	0.127518	0.0244468	0.0994994	0.626601	0.0244468	0.101397	0.264373	-0.0435404	0.11121	0.089753
ABCG1_-_43639652.23-P1P2	0.0958725	-0.196374	-0.0988945	0.0958725	0.150252	1.2633	0.0958725	0.0681012	0.407148	0.0769514	0.30147	0.776822
ABCG2_+_89079727.23-P1P2	0.0178369	0.363766	0.794952	0.0178369	-0.0064327	0.0995907	0.0178369	-0.12541	-0.179009	0.0683944	0.0983168	0.382265
ABCG2_+_89079755.23-P1P2	-0.00763139	0.0922485	0.170785	-0.00763139	-0.156051	-0.735563	-0.00763139	0.0792901	0.130903	-0.0510759	-0.0556533	-0.235754
ABCG2_+_89079974.23-P1P2	0.0570536	0.32574	0.836568	0.0570536	0.145838	1.02439	0.0570536	0.299031	0.727809	0.076577	0.204701	0.59933
ABCG2_+_89080025.23-P1P2	0.129171	0.00881586	0.415176	0.129171	0.121684	1.31864	0.129171	-0.10219	0.184104	0.0668467	0.160183	0.490693
ABCG2_+_89080044.23-P1P2	0.25474	0.181777	1.14256	0.25474	-0.209667		0.25474	-0.432287		0.111409	-0.155524
ABCG2_-_89079568.23-P1P2	-0.0778192	0.250883	0.278898	-0.0778192	0.384202	1.36737	-0.0778192	-0.277651	-0.738534	-0.0339178	0.295872	0.453603
ABCG2_-_89079599.23-P1P2	0.0453021	0.198164	0.543944	0.0453021	-0.149508	-0.407363	0.0453021	-0.136383	-0.120685	0.0492241	0.302285	0.700026
ABCG2_-_89079947.23-P1P2	0.0212786	-0.411194	-0.756921	0.0212786	-0.124704	-0.427896	0.0212786	-0.176162	-0.264095	0.0260027	-0.295991	-0.456337
ABCG2_-_89079989.23-P1P2	-0.0622667	0.00790008	-0.16403	-0.0622667	-0.124704	-0.898148	-0.0622667	0.0489733	-0.0826958	0.00646249	-0.490189	-0.865575
ABCG2_-_89080000.23-P1P2
ABCG4_+_119019794.23-P1P2	0.0327233	0.0882146	0.284359	0.0327233	0.0700955	0.53723	0.0327233	-0.0223713	0.0565398	-0.0162242	-0.192544	-0.386945
ABCG4_+_119019855.23-P1P2	-0.0408478	-0.0193549	-0.154376	-0.0408478	-0.167588	-0.975873	-0.0408478	-0.0148172	-0.140563	0.0861902	0.0504778	0.345284
ABCG4_+_119020113.23-P1P2	0.0550837	-0.151722	-0.131895	0.0550837	-0.1026	-0.135413	0.0550837	-0.218392	-0.246055	-0.0720257		-0.266637
ABCG4_-_119019755.23-P1P2	-0.00338731	0.255526	0.512738	-0.00338731	0.0236962	0.119435	-0.00338731	0.20352	0.375549	-0.0844026	0.158135	0.0599442
ABCG4_-_119019776.23-P1P2	-0.00407504	-0.328134	-0.665944	-0.00407504	-0.00866891	-0.0340849	-0.00407504	-0.499924	-0.942719	0.00537756	-0.448698	-0.792988
ABCG4_-_119019784.23-P1P2	0.0807395	0.00610555	0.263647	0.0807395	0.148664	1.17078	0.0807395	-0.273464	-0.275443	0.0116438	-0.140297	-0.213008
ABCG4_-_119019798.23-P1P2
ABCG4_-_119019811.23-P1P2	-0.104037		-0.344176	-0.104037		0.700083	-0.104037		-0.402552	-0.136432		-0.275055
ABCG4_-_119020171.23-P1P2	0.0460544	-0.2555	-0.368334	0.0460544	-0.229328	-0.772197	0.0460544	-0.0749645	-0.00359672	0.0576538	-0.435761	-0.621813
ABCG4_-_119020232.23-P1P2	-0.210115		-0.418475	-0.210115		-0.291291	-0.210115		-0.473286	-0.202086		-0.342878
ABCG5_+_44065447.23-P1P2	0.0200142	0.278533	0.629695	0.0200142	-0.171875	-0.653118	0.0200142	-0.106243	-0.136892	-0.0460566	-0.256932	-0.588564
ABCG5_+_44065537.23-P1P2	-0.034165	0.167009	0.241472	-0.034165	0.790247	3.49055	-0.034165	0.404142	0.662586	0.0341396	-0.407376	-0.636447
ABCG5_+_44065669.23-P1P2	0.0312357	-0.389782	-0.683727	0.0312357	-0.214348	-0.78634	0.0312357	0.123471	0.32517	-0.00419364	-0.000284702	-0.00244388
ABCG5_+_44065862.23-P1P2	-0.00595075	-0.24117	-0.496289	-0.00595075	0.105506	0.483275	-0.00595075	0.296882	0.542889	0.14068	0.0896896	0.570616
ABCG5_+_44065865.23-P1P2	-0.122441	0.46717	0.58034	-0.122441	-0.05924	-0.93416	-0.122441	-0.261237	-0.835937	-0.0695174	-0.00161633	-0.189297
ABCG5_-_44065428.23-P1P2	0.0213286	0.290941	0.658672	0.0213286	0.0753036	0.497174	0.0213286	-0.0650045	-0.0559525	-0.00228667	-0.0256	-0.0432161
ABCG5_-_44065433.23-P1P2	-0.0230736	0.131183	0.2027	-0.0230736	0.410594	1.79755	-0.0230736	0.162147	0.241608	-0.0305412	0.108906	0.122253
ABCG5_-_44065438.23-P1P2	0.00298107	-0.312902	-0.613957	0.00298107	0.234434	1.12968	0.00298107	-0.126148	-0.223045	0.0107956	0.035204	0.104579
ABCG5_-_44065586.23-P1P2	-0.0842108	0.0754609	-0.0940147	-0.0842108	0.0219367	-0.343633	-0.0842108	0.184961	0.10876	-0.0207703	-0.0784427	-0.191745
ABCG5_-_44065840.23-P1P2
ABCG8_+_44066166.23-P1P2	0.00399724	-0.010189	-0.000649434	0.00399724	-0.170787	-0.738243	0.00399724	-0.194064	-0.347212	0.0528705	-0.363786	-0.50409
ABCG8_+_44066180.23-P1P2	0.0624017	0.0516122	0.300079	0.0624017	-0.21085	-0.594745	0.0624017	-0.240397	-0.26622	-0.17524		-0.200346
ABCG8_+_44066240.23-P1P2	-0.0480482	0.419337	0.708274	-0.0480482	-0.0720431	-0.574625	-0.0480482	0.270579	0.372799	-0.201003		-0.545146
ABCG8_+_44066323.23-P1P2	-0.046081	-0.237256	-0.609428	-0.046081	0.0449921	-0.0224083	-0.046081	-0.28175	-0.655077	0.0644597	-0.276299	-0.31186
ABCG8_+_44066333.23-P1P2	-0.102111	-0.212509	-0.728522	-0.102111	0.174325	0.260223	-0.102111	-0.28423	-0.820591	0.0187785	-0.0799485	-0.0828344
ABCG8_-_44066172.23-P1P2	0.0532987	-0.126298	-0.0860274	0.0532987	0.188408	1.20009	0.0532987	-0.143955	-0.111893	0.0191812	0.0379496	0.13326
ABCG8_-_44066199.23-P1P2	0.0696184	-0.0730546		0.0696184	-0.0557687		0.0696184	-0.0378427			0.390282	0.720082
ABCG8_-_44066213.23-P1P2	-0.041402	-0.265222	-0.651695	-0.041402	-0.0685562	-0.521092	-0.041402	0.00476238	-0.105517	-0.0557977	0.0693128	-0.0212415
ABCG8_-_44066292.23-P1P2	-0.00548465	0.127188	0.247694	-0.00548465	0.156499	0.721679	-0.00548465	-0.178439	-0.345199	-0.0478606	0.136175	0.123074
ABCG8_-_44066373.23-P1P2	0.014958	-0.0950293	-0.138623	0.014958	-0.175199	-0.696948	0.014958	-0.297334	-0.508982	0.019746	-0.392319	-0.64963
ABHD10_+_111697851.23-P1P2	-0.0162218	0.238397	0.439499	-0.0162218	0.244024	1.06594	-0.0162218	0.0858028	0.118425	-0.0179651	-0.341112	-0.662736
ABHD10_+_111697939.23-P1P2	0.0194932	0.0482608	0.163915	0.0194932	-0.261485	-1.07039	0.0194932	-0.289698	-0.481672	-0.127156	0.128776	-0.114289
ABHD10_+_111698093.23-P1P2	-0.0119447	-0.233756	-0.499422	-0.0119447	-0.120278	-0.594434	-0.0119447	0.121973	0.198387	-0.0013095	0.282243	0.520815
ABHD10_+_111698102.23-P1P2	-0.108281	0.202533	0.089557	-0.108281	-0.0351429	-0.743042	-0.108281	-0.34726	-0.95625	-0.0343883	-0.243174	-0.530537
ABHD10_+_111698117.23-P1P2	-0.138881		-0.505365	-0.138881		-0.0336558	-0.138881		-0.556007	0.0316647	-0.286032	-0.422194
ABHD10_+_111698316.23-P1P2	-0.0739291	0.273866	0.336962	-0.0739291	-0.0357381	-0.552435	-0.0739291	-0.332831	-0.830619	-0.0175428	0.164591	0.260476
ABHD10_-_111697877.23-P1P2	-0.0992936	-0.118375	-0.53026	-0.0992936	-0.0187777	-0.616783	-0.0992936	-0.0441613	-0.363282	-0.0245717	0.49813	0.848755
ABHD10_-_111697911.23-P1P2	0.0632892	-0.266518	-0.338567	0.0632892	-0.0939586	-0.0492705	0.0632892	-0.268318	-0.315917	-0.00301656	-0.271262	-0.493179
ABHD10_-_111697914.23-P1P2	0.0117767	0.206276	0.459187	0.0117767	0.362144	1.76969	0.0117767	0.134832	0.290559	0.0396578	0.291653	0.653634
ABHD10_-_111697938.23-P1P2	0.0770234	0.0200004	0.280451	0.0770234	-0.221114	-0.559898	0.0770234	0.0243136	0.271092	0.122923	-0.28969	-0.171219
ABHD11_+_73152640.23-P1P2	-0.0309429	0.0310815	-0.0228282	-0.0309429	-0.103259	-0.622678	-0.0309429	-0.0408243	-0.160789	0.00325609	-0.373276	-0.661465
ABHD11_+_73152656.23-P1P2	0.0297508	0.270923	0.643719	0.0297508	0.286684	1.52195	0.0297508	-0.0203779	0.0517353	0.00541874	-0.127214	-0.206729
ABHD11_+_73152963.23-P1P2	0.0698476	-0.174456	-0.133199	0.0698476	-0.196945	-0.488539	0.0698476	-0.0665047	0.0805487	0.0683025	0.0214059	0.241778
ABHD11_+_73153163.23-P1P2	-0.0110797	-0.2684	-0.566653	-0.0110797	0.142766	0.626685	-0.0110797	0.109	0.176595	-0.0268708	-0.0702126	-0.193963
ABHD11_-_73152688.23-P1P2	0.0512048	-0.119438	-0.0785129	0.0512048	-0.183863	-0.532985	0.0512048	-0.236948	-0.291915	0.0286084	-0.0971238	-0.086397
ABHD11_-_73153052.23-P1P2	-0.100935	-0.0181592	-0.333185	-0.100935	0.137612	0.0970845	-0.100935	0.176845	0.0455542	-0.0838291	-0.271656	-0.72205
ABHD11_-_73153080.23-P1P2	0.128078	-0.20887		0.128078	-0.0953012		0.128078	-0.288134		0.10353	-0.192723
ABHD11_-_73153094.23-P1P2	-0.20439	-0.0427757	-0.69482	-0.20439	-0.0795795	-1.48947	-0.20439	-0.123866	-0.814181	-0.203316	-0.200093	-0.928915
ABHD11_-_73153115.23-P1P2	-0.0643514	-0.158521	-0.505808	-0.0643514	0.274404	0.935497	-0.0643514	0.539019	0.828298	-0.14456	0.362466	0.26265
ABHD11_-_73153135.23-P1P2	-0.079646	0.271385	0.314719	-0.079646	0.22401	0.6164	-0.079646	-0.0762606	-0.366935	-0.0223916	0.323936	0.537312
ABHD12B_+_51339177.23-P1P2	0.0451301	0.0708689	0.286809	0.0451301	0.145798	0.957095	0.0451301	-0.228858	-0.294218	0.0270419	0.0442482	0.166936
ABHD12B_-_51338832.23-P1P2	-0.0425065	-0.140286	-0.403166	-0.0425065	0.130202	0.391701	-0.0425065	-0.182295	-0.458711	-0.0225546	-0.150907	-0.328903
ABHD12B_-_51338864.23-P1P2	-0.0133752	0.0901829	0.149298	-0.0133752	0.0469767	0.170859	-0.0133752	-0.102682	-0.226097	-0.03495	0.0828762	0.062346
ABHD12B_-_51338879.23-P1P2	0.0635135	-0.040484	0.117774	0.0635135	-0.106124	-0.104259	0.0635135	0.0115745	0.208465	0.00639705	-0.0277504	-0.0226205
ABHD12B_-_51338885.23-P1P2	0.0358091	-0.284888	-0.458477	0.0358091	0.345565	1.82831	0.0358091	-0.187594	-0.243766	-0.0664012	0.126207	0.0525546
ABHD12B_-_51338895.23-P1P2	-0.0512607	0.247441	0.352058	-0.0512607	-0.0105618	-0.308432	-0.0512607	0.123108	0.0876267	-0.0326093	0.142781	0.178176
ABHD12B_-_51338913.23-P1P2	0.0123175	0.104282	0.255208	0.0123175	-0.0395865	-0.0847717	0.0123175	-0.186644	-0.309438	0.0108741	-0.0695776	-0.0862418
ABHD12B_-_51338916.23-P1P2	0.0515618	0.109827	0.384744	0.0515618	0.0881018	0.726524	0.0515618	-0.0277696	0.100528	0.023191	0.207331	0.453404
ABHD12B_-_51339227.23-P1P2	0.110365	-0.188036	-0.03838	0.110365	-0.121645	0.087687	0.110365	-0.115234	0.105699	-0.0275045	0.349164	0.568874
ABHD12B_-_51339232.23-P1P2	-0.0261363	0.309569	0.553075	-0.0261363	-0.059291	-0.392326	-0.0261363	0.0227655	-0.027998	0.0199091	0.0249831	0.111673
ABHD12_+_25371025.23-P1P2	0.020317	-0.468375	-0.875094	0.020317	-0.0788884	-0.221467	0.020317	-0.293444	-0.486317	-0.000499921	0.314837	0.582529
ABHD12_+_25371393.23-P1P2	0.0111761	-0.132665	-0.225901	0.0111761	-0.165463	-0.673218	0.0111761	0.014958	0.0645242	0.0909813	0.322565	0.854892
ABHD12_+_25371436.23-P1P2	0.034732	-0.153212	-0.196278	0.034732	-0.0780231	-0.136329	0.034732	0.0903031	0.273145	0.00866948	-0.107729	-0.162026
ABHD12_-_25371009.23-P1P2	-0.0301537	0.0894658	0.0972498	-0.0301537	-0.197303	-1.05307	-0.0301537	-0.32082	-0.682454	0.115427	-0.187096	-0.00532665
ABHD12_-_25371014.23-P1P2	-0.0322309	-0.0393247	-0.168646	-0.0322309	0.0440196	0.051053	-0.0322309	0.127538	0.150554	0.0591908	-0.414161	-0.578091
ABHD12_-_25371024.23-P1P2	-0.109641	0.240885	0.162771	-0.109641		-0.486174	-0.109641		-0.572696	-0.0081165	0.0751486	0.124014
ABHD12_-_25371053.23-P1P2	-0.0875043	0.23103	0.209666	-0.0875043	-0.0795795	-0.831558	-0.0875043	0.0316004	-0.187667	0.00175662	-0.418834	-0.748762
ABHD12_-_25371057.23-P1P2	-0.0134287	-0.226405	-0.489079	-0.0134287	0.374662	1.6857	-0.0134287	-0.242472	-0.487828	-0.000499921	-0.113105	-0.197714
ABHD12_-_25371074.23-P1P2	-0.0376834	-0.0531231	-0.212906	-0.0376834	-0.0386444	-0.361856	-0.0376834	0.211869	0.292701	0.00661752	0.110911	0.230816
ABHD12_-_25371489.23-P1P2	-0.0169146	-0.291866	-0.631554	-0.0169146	0.359722	1.597	-0.0169146	-0.0830339	-0.199494	0.0425144	-0.498813	-0.779514
ABHD13_+_108870795.23-P1P2	0.000585103	0.19201	0.396675	0.000585103	0.0439305	0.235353	0.000585103	-0.0155469	-0.0229658	-0.00816508	-0.153518	-0.293038
ABHD13_+_108870811.23-P1P2	-0.0890722	-0.176042	-0.615685	-0.0890722	0.057461	-0.206741	-0.0890722	-0.107884	-0.453174	-0.0667133	0.260169	0.295919
ABHD13_+_108871155.23-P1P2	-0.0470608	0.166111	0.20077	-0.0470608	0.419781	1.70501	-0.0470608	0.0135865	-0.105253	0.0136194	0.082229	0.198289
ABHD13_+_108871228.23-P1P2	-0.0278698	0.0682612	0.0613912	-0.0278698	-0.194944	-1.02931	-0.0278698	-0.0552898	-0.179033	-0.0381168	-0.172625	-0.412435
ABHD13_+_108871236.23-P1P2	-0.00675989	-0.179791	-0.374995	-0.00675989	0.542349	2.49858	-0.00675989	0.0962654	0.16517	-0.0236279	-0.220111	-0.458109
ABHD13_-_108870880.23-P1P2	-0.0190881	0.0902111	0.132125	-0.0190881	-0.00594617	-0.106	-0.0190881	-0.142143	-0.31634	0.0205309	-0.0717187	-0.062882
ABHD13_-_108870892.23-P1P2	-0.0325171	0.0657959	0.0424054	-0.0325171	0.146994	0.52557	-0.0325171	0.0686614	0.0395623	0.0274265	-0.423396	-0.684607
ABHD13_-_108870927.23-P1P2	0.021126	0.126932	0.327434	0.021126	-0.00987788	0.102174	0.021126	-0.23414	-0.373023	0.000510128	0.302916	0.563645
ABHD13_-_108871256.23-P1P2	-0.0653143	0.168174	0.149878	-0.0653143	0.400403	1.51267	-0.0653143	0.128512	0.0573882	-0.0711323	0.0206362	-0.153284
ABHD13_-_108871313.23-P1P2	0.052206	0.251513	0.672312	0.052206	-0.1846	-0.530758	0.052206	-0.569103	-0.910572	0.0264688	0.299144	0.630056
ABHD14A_+_52009088.23-P1P2	-0.059588	-0.142326	-0.458794	-0.059588	-0.21085	-1.28139	-0.059588	-0.140942	-0.430376	-0.0735914	0.196546	0.1605
ABHD14A_+_52009119.23-P1P2	0.0504148	-0.34279	-0.531153	0.0504148	0.348459	1.9239	0.0504148	-0.441072	-0.676142	0.00224975	-0.0380577	-0.053122
ABHD14A_+_52009149.23-P1P2	0.0493582	0.0537004	0.264951	0.0493582	-0.19028	-0.573053	0.0493582	-0.0557856	0.0417768	0.0327566	-0.119147	-0.114839
ABHD14A_+_52009194.23-P1P2	-0.0278363	-0.346476	-0.774583	-0.0278363	-0.241739	-1.24549	-0.0278363	0.182212	0.265479	-0.0331538	0.073106	0.0496038
ABHD14A_+_52009199.23-P1P2	-0.0205215	0.24119	0.432163	-0.0205215	0.632467	2.8378	-0.0205215	-0.151546	-0.338051	0.00460308	-0.0542014	-0.0759118
ABHD14A_+_52009255.23-P1P2	-0.0184004	0.209233	0.374137	-0.0184004	0.0957342	0.368017	-0.0184004	0.175649	0.280291	0.0297368	0.0860997	0.25085
ABHD14A_-_52009122.23-P1P2	-0.0219671	-0.365936	-0.796112	-0.0219671	-0.254103	-1.26962	-0.0219671	0.061784	0.0569845	-0.086675	0.217299	0.161399
ABHD14A_-_52009154.23-P1P2	-0.169489	0.16564	-0.169413	-0.169489	0.182294	-0.0821866	-0.169489	-0.0526764	-0.580762	-0.24172	0.266429	-0.186756
ABHD14A_-_52009160.23-P1P2	0.00689249	-0.186375	-0.347094	0.00689249	0.0662926	0.374252	0.00689249	-0.0497814	-0.068916	0.024044	0.231601	0.500063
ABHD14A_-_52009315.23-P1P2	-0.0293102	-0.0164567	-0.113737	-0.0293102	0.424028	1.82456	-0.0293102	0.0252683	-0.0324278	0.00540875	0.460218	0.864276
ABHD14B_+_52007815.23-P1	-0.00601037	0.0737327	0.138348	-0.00601037	-0.158618	-0.738308	-0.00601037	-0.398748	-0.758954	0.044058	-0.00550513	0.124264
ABHD14B_+_52016945.23-P2	0.00850889	-0.215637	-0.401209	0.00850889	0.173686	0.879912	0.00850889	-0.156505	-0.263978	-0.0483114	0.26673	0.359833
ABHD14B_+_52017055.23-P2	-0.0475571	-0.323519	-0.787779	-0.0475571	0.311258	1.20043	-0.0475571	0.08966	0.035672	0.016728	0.0999988	0.239464
ABHD14B_+_52017325.23-P2	-0.0587146	-0.0363021	-0.242425	-0.0587146	0.149	0.387387	-0.0587146	-0.0176569	-0.197176	-0.00756061	0.484711	0.872315
ABHD14B_+_52017350.23-P2	0.0430061	0.0362238	0.210562	0.0430061	-0.148011	-0.413364	0.0430061	-0.0197749	0.0909224	-0.0170958	0.0328308	0.0215078
ABHD14B_+_52017353.23-P2	-0.0385976	-0.148678	-0.408294	-0.0385976	0.12597	0.394135	-0.0385976	-0.0941039	-0.282464	-0.0216311	0.00927838	-0.0342383
ABHD14B_-_52007690.23-P1	0.00822469	0.239261	0.514969	0.00822469	0.184159	0.926737	0.00822469	0.0516986	0.1248	0.0101156	0.187214	0.379811
ABHD14B_-_52007852.23-P1	-0.026699	-0.250466	-0.577605	-0.026699	0.0380226	0.0544621	-0.026699	-0.0253942	-0.119731	-0.0216819	-0.0325913	-0.11072
ABHD14B_-_52007865.23-P1	-0.00189158	0.0160092	0.0344037	-0.00189158	0.0420992	0.212945	-0.00189158	-0.0938531	-0.176605	-0.0150121	-0.0582676	-0.138704
ABHD14B_-_52007985.23-P1	-0.0121532	-0.0413948	-0.112266	-0.0121532	0.396841	1.79543	-0.0121532	0.101835	0.160105	-0.0253996	0.0790664	0.082363
ABHD14B_-_52007995.23-P1	-0.00179979	0.0216401	0.046032	-0.00179979	0.197895	0.933823	-0.00179979	-0.0972921	-0.182776	0.000828145	-0.126126	-0.217706
ABHD14B_-_52008010.23-P1	-0.0362054	-0.153286	-0.410369	-0.0362054	0.00713717	-0.141854	-0.0362054	0.0522668	-0.00170528	-0.0400305	-0.0502092	-0.194645
ABHD14B_-_52008027.23-P1	-0.0156268	0.121666	0.205975	-0.0156268	0.139092	0.584103	-0.0156268	0.0803293	0.109891	-0.00484178	0.0907787	0.161757
ABHD14B_-_52008030.23-P1	0.0115945	-0.101323	-0.161454	0.0115945	0.0455288	0.304712	0.0115945	-0.0412933	-0.0395325	-0.0159649	0.133627	0.208476
ABHD14B_-_52008040.23-P1	0.0635457	0.0434915	0.287159	0.0635457	0.220493	1.40612	0.0635457	-0.292768	-0.360931	0.0501951	-0.0056274	0.141368
ABHD14B_-_52016935.23-P2	0.0477469	0.01252	0.177075	0.0477469	0.151003	0.995893	0.0477469	-0.052123	0.0440041	-0.0808828	0.119428	-0.000690699
ABHD14B_-_52016965.23-P2	-0.080057	0.0954786	-0.0411331	-0.080057	-0.0152428	-0.492162	-0.080057	-0.000998079	-0.227282	-0.00334988	-0.0696114	-0.126461
ABHD14B_-_52017160.23-P2	-0.0664305	0.120582	0.0505701	-0.0664305	0.1899	0.53307	-0.0664305	0.196126	0.180704	-0.13478	0.149583	-0.0978759
ABHD14B_-_52017383.23-P2	0.00422814	0.0176629	0.056194	0.00422814	-0.051918	-0.187322	0.00422814	0.189863	0.371859	0.0101863	-0.0496694	-0.0518862
ABHD14B_-_52017387.23-P2	-0.00690517	-0.0556967	-0.12527	-0.00690517	-0.156634	-0.734169	-0.00690517	-0.124649	-0.248625	-0.114357	0.356201	0.336499
ABHD15_+_27893596.23-P1P2	0.029219	-0.0456202	0.00399105	0.029219	0.377769	1.94011	0.029219	-0.240667	-0.361999	0.0571956	-0.0996485	-0.0102917
ABHD15_+_27893970.23-P1P2	0.0485385	0.354758	0.869386	0.0485385	0.132919	0.916729	0.0485385	-0.152743	-0.142004	0.0110804	-0.526382	-0.918525
ABHD15_-_27893577.23-P1P2	-0.0498082	-0.0908388	-0.325505	-0.0498082	0.257969	0.941369	-0.0498082	0.0733284	-0.00135115	-0.0214871	0.124896	0.176968
ABHD15_-_27893616.23-P1P2	-0.0192909	0.351701	0.658655	-0.0192909	0.100429	0.384712	-0.0192909	0.260072	0.435708	-0.0216416	0.305855	0.506463
ABHD15_-_27893641.23-P1P2	0.0393063	-0.0725795	-0.0199341	0.0393063	-0.0977727	-0.201898	0.0393063	-0.22574	-0.305104	-0.0637045		-0.299156
ABHD15_-_27893654.23-P1P2	0.00590119	-0.0628716	-0.101111	0.00590119	-0.199131	-0.858582	0.00590119	-0.340065	-0.614944	0.0298972	-0.333465	-0.513666
ABHD15_-_27893937.23-P1P2	0.0657414	-0.440003	-0.680903	0.0657414	-0.151399	-0.301056	0.0657414	-0.200498	-0.181972	-0.017971	0.126558	0.189924
ABHD15_-_27893964.23-P1P2	-0.0257638	-0.186411	-0.445656	-0.0257638	0.217422	0.889227	-0.0257638	-0.143351	-0.337769	0.0506523	0.00847424	0.168369
ABHD15_-_27893980.23-P1P2	0.0330222	0.0438805	0.195887	0.0330222	-0.267264	-1.02096	0.0330222	-0.391351	-0.633041	0.0122814	0.176945	0.367202
ABHD15_-_27894008.23-P1P2	-0.0544199	0.156782	0.159769	-0.0544199	0.299169	1.10591	-0.0544199	0.0904532	0.0174518	-0.0236279	0.126125	0.173164
ABHD16A_+_31670831.23-P1P2	0.0429712	0.0745075	0.287633	0.0429712	-0.118509	-0.277147	0.0429712	-0.396328	-0.613789	-0.0806805	0.216168	0.176262
ABHD16A_+_31671120.23-P1P2	0.0205593	-0.0426722	-0.0161831	0.0205593	-0.17024	-0.642492	0.0205593	-0.254719	-0.413158	-0.0465001	0.101346	0.0634116
ABHD16A_+_31671138.23-P1P2	-0.0800519	0.186455	0.142283	-0.0800519	0.0101131	-0.374893	-0.0800519	-0.013927	-0.251461	-0.11532		-0.525406
ABHD16A_-_31670442.23-P1P2	-0.021437	-0.0674738	-0.192838	-0.021437	-0.0591506	-0.365226	-0.021437	0.219249	0.353157	-0.0340609	0.392186	0.628803
ABHD16A_-_31670645.23-P1P2	-0.0843401	-0.470491	-1.195	-0.0843401	-0.189229	-1.32074	-0.0843401	-0.0867919	-0.400119	-0.0327393	-0.0431221	-0.161138
ABHD16A_-_31670650.23-P1P2	-0.114952		-0.13147	-0.114952		-0.318763	-0.114952		-0.4873	-0.051841	-0.120593	-0.356315
ABHD16A_-_31670671.23-P1P2	-0.00320221	-0.218811	-0.442927	-0.00320221	0.176767	0.828241	-0.00320221	0.117128	0.214423	-0.00305491	0.219964	0.402338
ABHD16A_-_31670675.23-P1P2	0.00628489	-0.166782	-0.309429	0.00628489	-0.0779817	-0.296258	0.00628489	-0.10371	-0.171572	0.0104361	-0.0454332	-0.0434575
ABHD16A_-_31670679.23-P1P2	-0.0394721	0.412343	0.720039	-0.0394721	-0.12675	-0.779304	-0.0394721	-0.101314	-0.298466	-0.0691303	0.147065	0.0828788
ABHD16A_-_31670764.23-P1P2	-0.00218686	0.133507	0.270379	-0.00218686	-0.113757	-0.509357	-0.00218686	0.0615186	0.113281	0.0591734	0.125841	0.406414
ABHD16B_+_62492825.23-P1P2	0.00422122	-0.455065	-0.896806	0.00422122	0.0769883	0.408671	0.00422122	-0.0627714	-0.100893	0.0482703	-0.507726	-0.779514
ABHD16B_+_62492837.23-P1P2	-0.0156943	-0.0287079	-0.09737	-0.0156943	-0.0990653	-0.517458	-0.0156943	0.258061	0.442271	0.0230942	0.0115431	0.0961612
ABHD16B_+_62492887.23-P1P2
ABHD16B_+_62493200.23-P1P2	-0.253055		-0.578608	-0.253055		-0.720367	-0.253055		-0.692158	-0.27642	0.568101	0.265301
ABHD16B_+_62493236.23-P1P2	-0.0194954	0.137306	0.225836	-0.0194954	-0.0545786	-0.333157	-0.0194954	0.0755182	0.0897809	-0.0534078	0.148553	0.12998
ABHD16B_+_62493242.23-P1P2	-0.0258774	-0.0553274	-0.181744	-0.0258774	-0.0976284	-0.568132	-0.0258774	-0.129402	-0.311993	0.00284434	-0.0856611	-0.138236
ABHD16B_+_62493291.23-P1P2	0.0508993	-0.351201	-0.546647	0.0508993	-0.106056	-0.174944	0.0508993	0.100768	0.339146	0.00443897	0.0323542	0.0814367
ABHD16B_-_62492870.23-P1P2	0.00679618	0.0535542	0.136293	0.00679618	-0.0448103	-0.140003	0.00679618	0.0158662	0.0536481	0.047933	0.097267	0.322583
ABHD16B_-_62493095.23-P1P2	0.0818818	0.214245	0.686683	0.0818818	-0.0863857	0.0903974	0.0818818	-0.141944	-0.0260613	0.0440543	0.0856112	0.290381
ABHD16B_-_62493298.23-P1P2	0.078055	-0.0554886	0.131382	0.078055	-0.19329	-0.425445	0.078055	-0.383785	-0.489584	0.023341	-0.315895	-0.500142
ABHD17A_+_1885071.23-P1P2	0.0423276	-0.110115	-0.0864906	0.0423276	-0.164663	-0.494178	0.0423276	-0.0876426	-0.0380207	0.0596867	0.116208	0.3903
ABHD17A_+_1885470.23-P1P2	0.0364115	-0.384029	-0.65652	0.0364115	-0.118875	-0.315763	0.0364115	0.14604	0.382262	0.0465915	-0.0147575	0.114547
ABHD17A_-_1885045.23-P1P2	-0.0581246	0.18699	0.209492	-0.0581246	0.330843	1.23151	-0.0581246	-0.0154172	-0.191291	-0.0441452	-0.07709	-0.255272
ABHD17A_-_1885067.23-P1P2	0.103543	-0.0620166	0.195091	0.103543	-0.0854253	0.21676	0.103543	-0.141514	0.0369363	0.0789792	-0.35893	-0.421525
ABHD17A_-_1885076.23-P1P2	0.0195852	0.158386	0.386195	0.0195852	0.310945	1.57691	0.0195852	0.0333288	0.123044	0.0137582	-0.313649	-0.523102
ABHD17A_-_1885086.23-P1P2	0.0437751	-0.326186	-0.517706	0.0437751	0.0270934	0.400606	0.0437751	0.00589943	0.141172	0.0137178	-0.204685	-0.324548
ABHD17A_-_1885099.23-P1P2	-0.0290277	0.279285	0.483305	-0.0290277	-0.146441	-0.811563	-0.0290277	0.203548	0.301983	-0.0955828	0.0883671	-0.098824
ABHD17A_-_1885105.23-P1P2	-0.157955	-0.169549	-0.810338	-0.157955	0.129317	-0.262216	-0.157955	-0.212307	-0.846347	-0.0762255	-0.271656	-0.700583
ABHD17A_-_1885122.23-P1P2	-0.00356896	0.161184	0.322006	-0.00356896	0.375868	1.74677	-0.00356896	0.0877224	0.158346	0.0264352	-0.274835	-0.416543
ABHD17A_-_1885483.23-P1P2	0.012442	0.217293	0.483402	0.012442	-0.0295254	-0.037551	0.012442	0.219841	0.451538	0.0544768	-0.278121	-0.343367
ABHD17B_+_74525655.23-P1P2	0.00430511	-0.138066	-0.257511	0.00430511	-0.0286195	-0.079162	0.00430511	-0.339037	-0.617604	0.0524999	0.0884434	0.319389
ABHD17B_+_74525744.23-P1P2	-0.0205769	0.410734	0.773782	-0.0205769	-0.0190447	-0.174944	-0.0205769	0.0986889	0.130033	0.0445241	-0.0788063	-0.00806584
ABHD17B_+_74525862.23-P1P2	0.045306	-0.0698032	0.0037571	0.045306	-0.120058	-0.271171	0.045306	-0.0754318	-0.00662011	0.0424125	-0.0129952	0.105962
ABHD17B_+_74526081.23-P1P2	-0.0134287	0.261466	0.494428	-0.0134287	-0.144037	-0.712645	-0.0134287	-0.1874	-0.384777	0.0523294	-0.212006	-0.228885
ABHD17B_+_74526089.23-P1P2	-0.0394158	-0.223593	-0.561784	-0.0394158	0.265891	1.03649	-0.0394158	0.241384	0.342955	-0.0106355	-0.283709	-0.537383
ABHD17B_+_74526100.23-P1P2	-0.0648922	0.247504	0.311073	-0.0648922	0.291484	1.01143	-0.0648922	-0.303367	-0.749537	-0.0901998	0.0421561	-0.16788
ABHD17B_-_74525630.23-P1P2	-0.0135436	0.218716	0.407901	-0.0135436	-0.130062	-0.648672	-0.0135436	0.230157	0.396232	-0.025329	-0.021742	-0.101236
ABHD17B_-_74525690.23-P1P2	-0.0712616	0.367643	0.534052	-0.0712616	0.0725251	-0.0368372	-0.0712616	-0.215563	-0.603526	-0.127895	0.309444	0.213028
ABHD17B_-_74525704.23-P1P2	-0.0561639	0.245448	0.333253	-0.0561639	0.171152	0.504173	-0.0561639	0.339885	0.479184	-0.00696711	0.306763	0.549549
ABHD17B_-_74526135.23-P1P2	0.0258564	-0.423181	-0.767281	0.0258564	0.0990077	0.632262	0.0258564	0.158199	0.374708	0.0518875	0.315783	0.732156
ABHD17C_+_80987662.23-P1P2	0.00645375	0.129279	0.287914	0.00645375	0.0817482	0.443246	0.00645375	-0.0649707	-0.0985982	-0.0712472	-0.120593	-0.411103
ABHD17C_+_80987691.23-P1P2	-0.0857289	-0.301333	-0.858177	-0.0857289	-0.182202	-1.29607	-0.0857289	-0.482423	-1.14442	-0.0358621	-0.28632	-0.613364
ABHD17C_+_80987703.23-P1P2	-0.19302	0.00590187	-0.562398	-0.19302	0.736705	2.34883	-0.19302	0.467739	0.325483	-0.141284	0.103453	-0.200346
ABHD17C_+_80987878.23-P1P2	-0.116631		-0.604845	-0.116631		0.121303	-0.116631		-0.55513	-0.0307462	-0.239196	-0.513002
ABHD17C_+_80987887.23-P1P2	-0.1106	0.168072	0.0130936	-0.1106	-0.0927896	-1.02264	-0.1106	-0.0302417	-0.369699	0.0288402	-0.0383506	0.0214153
ABHD17C_+_80988086.23-P1P2
ABHD17C_+_80988162.23-P1P2	-0.0424159	-0.402122	-0.93073	-0.0424159	0.472717	1.97592	-0.0424159	-0.0971881	-0.299199	0.0391624	-0.162587	-0.175956
ABHD17C_-_80987718.23-P1P2	0.0263663	-0.448986	-0.817764	0.0263663	0.0518105	0.416903	0.0263663	-0.226899	-0.344428	0.0184138	-0.171478	-0.250745
ABHD17C_-_80988060.23-P1P2	0.0345552	-0.0503378	0.0105743	0.0345552	-0.186741	-0.640009	0.0345552	-0.261837	-0.386291	-0.125153	0.198558	0.0185968
ABHD17C_-_80988126.23-P1P2	0.0194958	-0.0965044	-0.127912	0.0194958	0.0198588	0.230494	0.0194958	0.0380466	0.131615	-0.0106892	-0.350991	-0.660207
ABHD1_+_27346724.23-P1P2	-0.0302834	-0.00402015	-0.0916011	-0.0302834	-0.0902364	-0.558753	-0.0302834	-0.0201309	-0.120173	-0.062322	-0.203674	-0.537383
ABHD1_+_27346727.23-P1P2	-0.00238425	0.345321	0.696783	-0.00238425	0.392383	1.8298	-0.00238425	0.132279	0.245121	-0.0101992	0.34468	0.609556
ABHD1_+_27347051.23-P1P2	0.00260843	-0.196893	-0.381217	0.00260843	0.222036	1.07026	0.00260843	0.242963	0.46657	0.0101995	-0.555068	-0.973313
ABHD1_+_27347075.23-P1P2	-0.0612197	-0.119683	-0.418069	-0.0612197	-0.0432361	-0.515566	-0.0612197	0.199178	0.201376	-0.0717264	0.46615	0.657319
ABHD1_+_27347086.23-P1P2	-0.0328494	0.168354	0.248152	-0.0328494	0.158715	0.577894	-0.0328494	0.202603	0.289241	-0.0375902	-0.182628	-0.429187
ABHD1_+_27347095.23-P1P2	0.0397603	0.19112	0.513031	0.0397603	-0.045997	0.0400556	0.0397603	0.0842038	0.276169	0.0506989	0.13131	0.392461
ABHD1_+_27347132.23-P1P2	-0.0397943	0.307361	0.507433	-0.0397943	-0.0964253	-0.640903	-0.0397943	0.142279	0.156421	-0.0589345	0.391202	0.556785
ABHD1_-_27346733.23-P1P2	0.00318857	0.0352553	0.0885235	0.00318857	-0.127062	-0.540623	0.00318857	-0.245926	-0.446578	0.00359963	0.153096	0.299208
ABHD1_-_27346736.23-P1P2	-0.0117002	0.434574	0.848614	-0.0117002	-0.0720431	-0.370032	-0.0117002	-0.0504081	-0.123472	0.0279518	-0.503321	-0.828848
ABHD1_-_27347069.23-P1P2	0.00609407	0.0751215	0.177653	0.00609407	0.303368	1.46594	0.00609407	0.0427981	0.102027	0.0197862	0.0246476	0.110715
ABHD2_+_89631693.23-P1P2	-0.0146735	0.211732	0.390416	-0.0146735	0.325306	1.45048	-0.0146735	-0.0249542	-0.0843796	-0.0192225	0.0705312	0.0842406
ABHD2_+_89632075.23-P1P2	-0.0336994	0.36618	0.644388	-0.0336994	-0.0436088	-0.362386	-0.0336994	-0.249368	-0.558933	-0.0616593	-0.227027	-0.578091
ABHD2_+_89632196.23-P1P2	0.0926982	-0.209685	-0.135302	0.0926982	-0.325231	-0.953086	0.0926982	-0.379959	-0.440382	0.0188151	-0.50183	-0.851924
ABHD2_-_89631662.23-P1P2	-0.0532735	0.208853	0.268197	-0.0532735	-0.09166	-0.69474	-0.0532735	-0.532937	-1.14575	-0.0312127	0.132646	0.163641
ABHD2_-_89631738.23-P1P2	-0.0861794	0.16215	0.0748066	-0.0861794	0.338873	1.11072	-0.0861794	-0.108222	-0.4455	-0.0390389	-0.223319	-0.507466
ABHD2_-_89631760.23-P1P2	0.0488872	-0.0401392	0.0743579	0.0488872	-0.221114	-0.718269	0.0488872	-0.330319	-0.473286	0.017529	-0.0394223	-0.0124729
ABHD2_-_89631921.23-P1P2	0.0510165	-0.141288	-0.123128	0.0510165	-0.233816	-0.765019	0.0510165	-0.462727	-0.714935	0.0341541	-0.283417	-0.410398
ABHD2_-_89631993.23-P1P2	-0.0309429	0.157885	0.232796	-0.0309429	0.209678	0.824269	-0.0309429	-0.0934984	-0.259353	-0.0289599	0.241619	0.368684
ABHD2_-_89632047.23-P1P2	0.00417768	0.356324	0.738754	0.00417768	-0.0438258	-0.15019	0.00417768	-0.270205	-0.48917	-0.0580638	0.0914493	0.012721
ABHD2_-_89632154.23-P1P2	-0.00947414	0.00181601	-0.017077	-0.00947414	0.0333698	0.129902	-0.00947414	0.0547554	0.0797023	-0.0152545	0.334411	0.57656
ABHD3_+_19284354.23-P1P2	0.0441561	0.25628	0.657646	0.0441561	-0.201213	-0.652886	0.0441561	-0.358274	-0.539179	0.0257525	0.0698639	0.209999
ABHD3_+_19284534.23-P1P2	-0.0641657	-0.0133377	-0.21257	-0.0641657	-0.033293	-0.486174	-0.0641657	0.214542	0.221667	0.076165	-0.496518	-0.680327
ABHD3_+_19284717.23-P1P2	0.043738	-0.0607045	0.0173703	0.043738	-0.267775	-0.963004	0.043738	0.0417411	0.208133	-0.0691507	0.160899	0.108044
ABHD3_+_19284728.23-P1P2	0.0116945	0.434634	0.91929	0.0116945	0.0181559	0.178709	0.0116945	-0.171839	-0.283523	0.0629447	-0.407376	-0.555123
ABHD3_-_19284369.23-P1P2	-0.0072918	0.378928	0.74973	-0.0072918	-0.0482324	-0.235123	-0.0072918	-0.243234	-0.471634	0.0898635	0.0552417	0.364341
ABHD3_-_19284492.23-P1P2	-0.0333369	0.287942	0.487761	-0.0333369	-0.126267	-0.742537	-0.0333369	0.231127	0.341216	-0.0434504	0.368405	0.558936
ABHD3_-_19284521.23-P1P2	0.00995022	0.0915994	0.222501	0.00995022	-0.0590222	-0.187962	0.00995022	0.0734677	0.170489	0.0291649	-0.18745	-0.249512
ABHD3_-_19284683.23-P1P2	0.0486494	0.409905	0.980892	0.0486494	0.103271	0.780267	0.0486494	0.18511	0.490508	0.0712642	-0.11836	-0.00468894
ABHD3_-_19284708.23-P1P2	0.0658938	-0.0413806	0.123146	0.0658938	0.0100325	0.44622	0.0658938	0.0021206	0.197609	-0.0453501	0.272509	0.378732
ABHD3_-_19284770.23-P1P2	-0.208495	0.0576997	-0.504651	-0.208495	0.214688	-0.151956	-0.208495	0.27946	-0.0712598	-0.181641	0.20532	-0.128555
ABHD4_+_23067144.23-P1P2	-0.0447084	-0.0742708	-0.276725	-0.0447084	-0.0295577	-0.359383	-0.0447084	-0.00153253	-0.126789	-0.144941	0.115671	-0.188393
ABHD4_+_23067433.23-P1P2	0.0564232	-0.406496	-0.641458	0.0564232	0.0740897	0.689098	0.0564232	-0.0879254	0.00192152	-0.0174095	0.0352207	0.0249797
ABHD4_+_23067458.23-P1P2	-0.0138713	0.0679419	0.102966	-0.0138713	0.246097	1.08875	-0.0138713	0.104224	0.159644	-0.0247453	0.0185281	-0.0261659
ABHD4_+_23067515.23-P1P2	0.0105265	-0.283599	-0.532129	0.0105265	0.439821	2.12182	0.0105265	-0.424362	-0.759402	0.0690922	0.271638	0.700241
ABHD4_+_23067613.23-P1P2	-0.0101064	-0.1115	-0.247419	-0.0101064	-0.0252907	-0.144889	-0.0101064	0.168077	0.289935	-0.01279	-0.141386	-0.283976
ABHD4_-_23067199.23-P1P2	-0.0301051	0.17038	0.260513	-0.0301051	-0.122309	-0.706046	-0.0301051	0.0793776	0.06654	0.0121442	0.0687589	0.169565
ABHD4_-_23067580.23-P1P2	0.0199321	0.0577204	0.184308	0.0199321	-0.122743	-0.426409	0.0199321	-0.0246945	0.0154665	0.0162253	-0.505536	-0.865993
ABHD4_-_23067583.23-P1P2	-0.020052	-0.172908	-0.401209	-0.020052	-0.237288	-1.18109	-0.020052	-0.341207	-0.691598	0.0653413	0.0619877	0.307408
ABHD4_-_23067625.23-P1P2	0.000363293	-0.530291	-1.06009	0.000363293	0.403507	1.8967	0.000363293	-0.438692	-0.815397	-0.047613	0.0966277	0.0516677
ABHD4_-_23067680.23-P1P2	-0.0481324	-0.0651098	-0.268584	-0.0481324	-0.0584879	-0.512422	-0.0481324	0.316889	0.459213	0.0161313	-0.0954539	-0.118578
ABHD5_+_43732395.23-P1P2	-0.0172203	0.184098	0.327027	-0.0172203	0.0270009	0.0568532	-0.0172203	0.470549	0.8355	-0.0076747	-0.221022	-0.41473
ABHD5_+_43732435.23-P1P2	0.0293509	-0.297264	-0.502904	0.0293509	-0.0674602	-0.117777	0.0293509	-0.098678	-0.0959292	0.0601846	-0.191309	-0.168973
ABHD5_+_43732515.23-P1P2	-0.0246832	-0.254387	-0.57943	-0.0246832	0.0817943	0.268198	-0.0246832	0.18502	0.279786	-0.056652	0.151534	0.126256
ABHD5_+_43732521.23-P1P2	-0.0649915	-0.194897	-0.581069	-0.0649915	-0.103677	-0.816259	-0.0649915	-0.266166	-0.680212	0.0374519	-0.122409	-0.10753
ABHD5_+_43732806.23-P1P2	0.030685	0.129992	0.362432	0.030685	-0.0390942	0.0208902	0.030685	0.00132194	0.0950224	-0.0102656	0.282951	0.496821
ABHD5_+_43732860.23-P1P2	-0.0362183	0.387962	0.680703	-0.0362183	0.121809	0.388289	-0.0362183	0.259849	0.386688	-0.00440752	0.174289	0.315244
ABHD5_-_43732422.23-P1P2	0.0309264	0.0950901	0.2928	0.0309264	0.263181	1.4199	0.0309264	-0.0528133	-0.00558297	0.0586671	-0.0602338	0.0657256
ABHD5_-_43732446.23-P1P2	0.142202	-0.378096	-0.325505	0.142202	-0.204839	-0.117777	0.142202	0.256315	0.892357	0.136458	-0.358253	-0.258012
ABHD5_-_43732464.23-P1P2	0.0487017	-0.0676533	0.0183324	0.0487017	-0.134673	-0.319632	0.0487017	0.118541	0.366094	0.0470074	-0.104617	-0.0481146
ABHD5_-_43732886.23-P1P2	0.0212484	0.0263007	0.124939	0.0212484	0.264389	1.37101	0.0212484	0.140508	0.328375	-0.0377899	-0.117968	-0.31186
ABHD6_+_58223718.23-P1P2	0.0865617	0.415305	1.10612	0.0865617	-0.11864	-0.0323973	0.0865617	0.14604	0.526254	0.0794841	-0.172159	-0.0795697
ABHD6_+_58223924.23-P1P2	0.029478	-0.36012	-0.629232	0.029478	-0.230737	-0.872016	0.029478	0.0493236	0.181378	-0.0895338	-0.00665094	-0.254987
ABHD6_+_58223966.23-P1P2	0.0139422	0.344677	0.744724	0.0139422	0.22806	1.16191	0.0139422	0.158087	0.340291	-0.020077	-0.386197	-0.750899
ABHD6_+_58223976.23-P1P2	-0.0372254	-0.110376	-0.326941	-0.0372254	0.167243	0.592698	-0.0372254	0.151207	0.180504	0.00360201	-0.0770087	-0.120321
ABHD6_+_58223988.23-P1P2	0.0241779	-0.369961	-0.665056	0.0241779	0.461141	2.29723	0.0241779	-0.329859	-0.54337	-0.0630995	0.426378	0.609161
ABHD6_-_58223553.23-P1P2	0.0484746	-0.326352	-0.503867	0.0484746	-0.15337	-0.407363	0.0484746	0.25038	0.612141	0.00130639	0.230702	0.434229
ABHD6_-_58223594.23-P1P2	-0.0513901	0.0109197	-0.12514	-0.0513901	0.175079	0.5492	-0.0513901	-0.273247	-0.654409	-0.0149314	0.0024167	-0.027834
ABHD6_-_58223751.23-P1P2	-0.114724	0.0936093	-0.149453	-0.114724	0.100086	-0.154039	-0.114724	0.166553	-0.0132939	-0.042377	-0.181108	-0.43993
ABHD6_-_58223761.23-P1P2	-0.0446789	-0.175481	-0.480668	-0.0446789	0.289071	1.11405	-0.0446789	-0.109437	-0.328617	-0.0272533	-0.217365	-0.463338
ABHD6_-_58223914.23-P1P2	-0.0200878	0.403329	0.760328	-0.0200878	-0.0630219	-0.375532	-0.0200878	0.21667	0.352205	-0.0826671	0.217896	0.173804
ABHD8_+_17413753.23-P1P2	0.0651467	-0.302628	-0.405761	0.0651467	-0.106917	-0.0987305	0.0651467	-0.153028	-0.0948527	0.139812	-0.481311	-0.472909
ABHD8_+_17413810.23-P1P2	-0.00461091	0.0781526	0.151478	-0.00461091	-0.0564888	-0.258209	-0.00461091	-0.226875	-0.433324	0.0127736	-0.277662	-0.460267
ABHD8_+_17413933.23-P1P2	0.010561	-0.535143	-1.03912	0.010561	0.115382	0.621881	0.010561	-0.0851871	-0.124635	-0.0276746	-0.123984	-0.29427
ABHD8_+_17414242.23-P1P2	0.0517175	0.156128	0.478552	0.0517175	-0.10304	-0.156392	0.0517175	-0.49127	-0.766333	0.0696683	0.0696368	0.33357
ABHD8_-_17413788.23-P1P2	-0.0237474	0.0367025	0.0102042	-0.0237474	0.0206918	-0.00905826	-0.0237474	0.138929	0.196227	0.00049657	-0.171321	-0.301044
ABHD8_-_17413792.23-P1P2	-0.0465895	0.0189139	-0.0945458	-0.0465895	-0.0233241	-0.341149	-0.0465895	0.034857	-0.0640978	-0.0406558	0.483168	0.776066
ABHD8_-_17413858.23-P1P2	-0.041159	-0.0221453	-0.16094	-0.041159	0.0921218	0.223212	-0.041159	0.255971	0.365245	0.0417241	0.0239144	0.171314
ABHD8_-_17414169.23-P1P2	0.0690557	-0.307694	-0.404183	0.0690557	0.103271	0.895129	0.0690557	-0.00942608	0.185081	-0.0160351	0.361904	0.624484
ABHD8_-_17414173.23-P1P2	-0.0310651	0.1177	0.151419	-0.0310651	-0.0164356	-0.221916	-0.0310651	0.141111	0.179299	0.0511107	-0.0480521	0.0666022
ABHD8_-_17414201.23-P1P2	-0.00108022	-0.232193	-0.463504	-0.00108022	-0.0181604	-0.0611144	-0.00108022	0.225566	0.423426	0.0259693	-0.283284	-0.433264
ABI1_+_27149446.23-P1P2	0.0415803	-0.408848	-0.690964	0.0415803	0.0851165	0.656538	0.0415803	0.164187	0.431061	-0.00529008	0.00396766	0.00221369
ABI1_+_27149474.23-P1P2	-0.012586	0.145515	0.263223	-0.012586	-0.0219061	-0.143196	-0.012586	-0.0783818	-0.17836	0.0279719	0.0986494	0.268748
ABI1_+_27149511.23-P1P2	0.0429684	0.0188168	0.175357	0.0429684	0.1074	0.767383	0.0429684	-0.324776	-0.479908	0.0305953	0.25994	0.570227
ABI1_+_27149704.23-P1P2	0.00400047	0.171947	0.366532	0.00400047	0.355873	1.69692	0.00400047	0.133612	0.265947	0.0561237	-0.35292	-0.475094
ABI1_+_27149800.23-P1P2	-0.0205256	0.306088	0.562979	-0.0205256	0.20572	0.864601	-0.0205256	0.0547318	0.0479271	0.0112323	0.00321849	0.0474946
ABI1_+_27149865.23-P1P2	0.0422634	-0.116799	-0.10016	0.0422634	-0.349225	-1.34791	0.0422634	0.0609333	0.239812	-0.00895065	-0.0938672	-0.186498
ABI1_-_27149345.23-P1P2	0.0327373	-0.0150453	0.0762383	0.0327373	0.0279473	0.342426	0.0327373	-0.121746	-0.129371	0.00289016	-0.105656	-0.174562
ABI1_-_27149590.23-P1P2	0.0201928	0.197495	0.466867	0.0201928	-0.211484	-0.835256	0.0201928	-0.0344566	-0.00205215	0.0458338	-0.0461835	0.0551109
ABI1_-_27149837.23-P1P2	0.027238	0.109403	0.310531	0.027238	0.140845	0.833486	0.027238	-0.112154	-0.127212	-0.00188627	-0.40489	-0.733624
ABI1_-_27149855.23-P1P2	0.080535	-0.245727	-0.244642	0.080535	-0.190144	-0.396936	0.080535	0.0933264	0.410312	-0.00608268	-0.0453806	-0.0899979
ABI2_+_204193030.23-P1P2	-0.0266564	0.186006	0.302413	-0.0266564	0.0560598	0.138101	-0.0266564	-0.0569687	-0.178691	-0.0170218	0.0808514	0.10927
ABI2_+_204193039.23-P1P2	-0.078784	-0.254525	-0.74287	-0.078784	0.125566	0.166072	-0.078784	0.233868	0.215858	-0.0678992	0.374508	0.501039
ABI2_+_204193043.23-P1P2	-0.00456765	-0.395454	-0.803142	-0.00456765	0.312745	1.44928	-0.00456765	0.0350273	0.0568745	-0.00757215	0.153732	0.268828
ABI2_+_204193079.23-P1P2	-0.0817031	0.0296172	-0.178868	-0.0817031	-0.0983845	-0.885854	-0.0817031	0.0916473	-0.0586496	-0.0783438	-0.395621	-0.932583
ABI2_+_204193085.23-P1P2	0.0829346	-0.14657	-0.0375132	0.0829346	-0.117682	-0.0483823	0.0829346	0.19824	0.613518	0.0286156	0.235278	0.519673
ABI2_+_204193116.23-P1P2	-0.0531444	-0.116971	-0.388247	-0.0531444	0.290779	1.07429	-0.0531444	0.169621	0.169255	-0.037105	-0.0674479	-0.217816
ABI2_+_204193458.23-P1P2	0.00375395	0.193356	0.408946	0.00375395	0.221147	1.0726	0.00375395	0.0786159	0.162331	0.0165094	0.193564	0.40944
ABI2_-_204193048.23-P1P2	-0.0503455	-0.163813	-0.474236	-0.0503455	0.442528	1.7917	-0.0503455	0.0304023	-0.0832179	0.029601	0.524019	1.0489
ABI2_-_204193058.23-P1P2	-0.0382095	-0.247519	-0.606379	-0.0382095	0.0175673	-0.104908	-0.0382095	-0.0377096	-0.175825	0.00172951	-0.518999	-0.931464
ABI2_-_204193288.23-P1P2	-0.0175274	0.074635	0.105432	-0.0175274	0.00910517	-0.0276215	-0.0175274	0.0208626	-0.00684098	0.0420923	-0.0398062	0.0561751
ABI3BP_+_100711811.23-P1P2	-0.0552226	0.32967	0.505874	-0.0552226	-0.0606636	-0.562391	-0.0552226	0.0232055	-0.110688	-0.142619	0.0643101	-0.275481
ABI3BP_+_100712193.23-P1P2	0.0263915	-0.0138118	0.0595866	0.0263915	-0.125494	-0.40277	0.0263915	-0.0228272	0.0375069	0.0695372	0.13199	0.446886
ABI3BP_+_100712238.23-P1P2	0.0420759	0.397512	0.936084	0.0420759	-0.204488	-0.679737	0.0420759	-0.49127	-0.794016	0.109818	-0.111245	0.117131
ABI3BP_+_100712278.23-P1P2	0.0845634	-0.359098	-0.461039	0.0845634	-0.116781	-0.0350494	0.0845634	-0.38816	-0.479084	-0.0608436	-0.120593	-0.381731
ABI3BP_+_100712307.23-P1P2	0.0838236	-0.436066	-0.618433	0.0838236	-0.0499191	0.26994	0.0838236	-0.150243	-0.0360165	0.0929336	0.170579	0.583296
ABI3BP_-_100712220.23-P1P2	-0.0743948	0.356569	0.502281	-0.0743948	-0.0113322	-0.442209	-0.0743948	0.371597	0.486179	0.016022	0.0456942	0.13846
ABI3BP_-_100712267.23-P1P2	0.0443825	-0.380343	-0.62505	0.0443825	-0.113041	-0.243923	0.0443825	-0.349564	-0.522231	-0.0341464	-0.278978	-0.595135
ABI3BP_-_100712283.23-P1P2	0.0626882	-0.102073	-0.00887328	0.0626882	0.453952	2.48076	0.0626882	0.167433	0.49774	0.0148371	0.0392457	0.123358
ABI3BP_-_100712320.23-P1P2	0.0592817	-0.314495	-0.44737	0.0592817	0.157615	1.09139	0.0592817	-0.468061	-0.701186	0.031362	0.0859408	0.255149
ABI3BP_-_100712323.23-P1P2	0.0332603	-3.41797e-05	0.108077	0.0332603	-0.0624269	-0.0724991	0.0332603	-0.137267	-0.156912	-0.0277804	0.201781	0.29938
ABI3_+_47287730.23-P1P2	0.0339985	0.158793	0.430485	0.0339985	0.359263	1.88145	0.0339985	0.111136	0.310022	0.00752864	0.185748	0.369833
ABI3_+_47287798.23-P1P2	-0.027272	0.118773	0.165021	-0.027272	-0.328681	-1.64431	-0.027272	0.242319	0.379573	-0.0505025	0.0197535	-0.0966506
ABI3_+_47288056.23-P1P2	-0.00338731	-0.16527	-0.33555	-0.00338731	0.271704	1.26616	-0.00338731	0.478405	0.889917	0.0752528	-0.31959	-0.36032
ABI3_+_47288122.23-P1P2	0.0189308	0.342546	0.755473	0.0189308	-0.343902	-1.45463	0.0189308	0.190023	0.414373	0.0334698	0.122208	0.327223
ABI3_+_47288159.23-P1P2	0.00837623	-0.0969807	-0.162408	0.00837623	-0.217929	-0.931567	0.00837623	0.112158	0.238368	0.000205097	-0.430041	-0.773577
ABI3_+_47288453.23-P1P2	0.0420994	-0.209995	-0.288528	0.0420994	0.182565	1.11004	0.0420994	0.146204	0.398901	0.00898928	0.348487	0.67067
ABI3_+_47288474.23-P1P2	0.0200002	0.048103	0.165126	0.0200002	0.311572	1.58214	0.0200002	-0.0602377	-0.0508471	0.0180687	-0.207066	-0.316605
ABI3_+_47288486.23-P1P2	0.00451819	-0.0697971	-0.119243	0.00451819	-0.145775	-0.619661	0.00451819	0.194275	0.380948	-0.103291	0.29139	0.249573
ABI3_+_47288524.23-P1P2	0.0157688	-0.184773	-0.317094	0.0157688	0.0843023	0.507487	0.0157688	-0.425583	-0.746635	0.0326655	-0.107483	-0.0938296
ABI3_-_47288028.23-P1P2	0.0923672	-0.483231	-0.687746	0.0923672	-0.0620743	0.261827	0.0923672	-0.585114	-0.825221	0.0259967	-0.208347	-0.296559
ABL1_+_133589362.23-ENST00000372348.2	0.0158298	0.0822997	0.221486	0.0158298	-0.142376	-0.540278	0.0158298	0.0100319	0.0686682	-0.0427558	0.183651	0.224046
ABL1_+_133589617.23-ENST00000372348.2	0.0551718	0.17954	0.536165	0.0551718	-0.177411	-0.480824	0.0551718	-0.112225	-0.0471415	0.0606409	-0.157024	-0.105174
ABL1_+_133589629.23-ENST00000372348.2	-0.0638029	0.393277	0.608225	-0.0638029	0.23529	0.757731	-0.0638029	0.262706	0.312834	-0.0318033	-0.0727977	-0.212601
ABL1_+_133589636.23-ENST00000372348.2	-0.00374625	0.0373789	0.0718897	-0.00374625	0.0322268	0.156858	-0.00374625	-0.00640591	-0.0182974	-0.0455335	0.147622	0.150514
ABL1_+_133589652.23-ENST00000372348.2	0.0634508	-0.327789	-0.461598	0.0634508	-0.129436	-0.212402	0.0634508	-0.545055	-0.833288	0.031893	0.0272136	0.149574
ABL1_-_133589216.23-ENST00000372348.2	0.080535	-0.417418	-0.590757	0.080535	-0.222113	-0.544756	0.080535	-0.00688403	0.222797	0.0595721	-0.0925379	0.00938216
ABL1_-_133589228.23-ENST00000372348.2	0.0859394	0.156749	0.583013	0.0859394	-0.18919	-0.362104	0.0859394	-0.148001	-0.0257454	0.0565406	-0.429515	-0.613568
ABL1_-_133589268.23-ENST00000372348.2	0.0129943	-0.0383828	-0.0303515	0.0129943	0.189378	0.977715	0.0129943	-0.0516211	-0.054839	-0.0173345	-0.10389	-0.228441
ABL1_-_133589272.23-ENST00000372348.2	-0.0471929	0.0152636	-0.103724	-0.0471929	0.374605	1.49539	-0.0471929	0.00704704	-0.117869	-0.036372	0.286372	0.429355
ABL1_-_133589804.23-ENST00000372348.2	0.0907069	-0.0848987	0.110251	0.0907069	0.133125	1.15504	0.0907069	0.0482988	0.355262	0.0666471	0.310555	0.764294
ABL2_+_179111875.23-P1	0.0200199	-0.122751	-0.179243	0.0200199	-0.275654	-1.13294	0.0200199	0.0190629	0.097598	-0.0426662	0.0417437	-0.0344333
ABL2_+_179111908.23-P1	0.0801768	0.105711	0.462747	0.0801768	-0.212803	-0.503723	0.0801768	-0.515183	-0.729366	0.121458	-0.516242	-0.588417
ABL2_+_179112036.23-P1	-0.037552	-0.0330224	-0.171989	-0.037552	-0.143604	-0.846425	-0.037552	-0.0451665	-0.18789	-0.0889473	0.0366342	-0.174412
ABL2_+_179112061.23-P1	-0.0226565	0.0373212	0.0147415	-0.0226565	-0.121645	-0.661051	-0.0226565	-0.142942	-0.328081	-0.0217896	0.155658	0.232201
ABL2_+_179112138.23-P1	-0.0630242	-0.25357	-0.693416	-0.0630242	-0.144037	-0.991804	-0.0630242	-0.349564	-0.830619	-0.0267523	-0.0792384	-0.210084
ABL2_+_179112168.23-P1	-0.0228105	0.279642	0.502776	-0.0228105	-0.191602	-0.985382	-0.0228105	-0.0200672	-0.0985982	-0.0617248	0.0386781	-0.0938296
ABL2_+_179112186.23-P1	0.0540469	0.0389991	0.249455	0.0540469	0.0117651	0.387549	0.0540469	-0.369878	-0.532494	0.00216105	-0.1081	-0.181077
ABL2_+_179198340.23-P2	0.0393389	0.0676763	0.262908	0.0393389	-0.16523	-0.513621	0.0393389	-0.0639018	-0.00217783	-0.0225709	0.175673	0.266487
ABL2_+_179198398.23-P2	-0.0210345	-0.206157	-0.471197	-0.0210345	0.27808	1.19631	-0.0210345	-0.257802	-0.53835	-0.0443499	0.152484	0.16272
ABL2_+_179198527.23-P2	0.0939389	-0.450734	-0.617495	0.0939389	0.0957342	1.00034	0.0939389	-0.0883068	0.108924	0.0360403	0.237222	0.54418
ABL2_+_179198561.23-P2	-0.00110922	-0.0201229	-0.0360761	-0.00110922	-0.237939	-1.07748	-0.00110922	-0.582362	-1.08846	-0.0214552	-0.300724	-0.598952
ABL2_+_179198565.23-P2	0.0596971	-0.359293	-0.536428	0.0596971	-0.378569	-1.38546	0.0596971	-0.309766	-0.403789	-0.0173217	0.092511	0.129681
ABL2_+_179198736.23-P2	-0.0396487	0.301289	0.495631	-0.0396487	0.00650831	-0.164143	-0.0396487	0.0508958	-0.0141574	-0.0353899	0.144557	0.173564
ABL2_+_179198740.23-P2	0.0374958	-0.0594918	0.000989186	0.0374958	-0.200103	-0.685239	0.0374958	-0.0896246	-0.0556026	0.0221723	-0.287975	-0.452536
ABL2_+_179198799.23-P2	0.0454131	-0.380629	-0.622518	0.0454131	-0.018571	0.198685	0.0454131	0.249213	0.601167	0.0796638	-0.404813	-0.503248
ABL2_-_179112151.23-P1	-0.047325	0.129307	0.125779	-0.047325	-0.132908	-0.851977	-0.047325	0.373616	0.567681	-0.0537235	0.201843	0.22625
ABL2_-_179112154.23-P1	-0.0418574	-0.176804	-0.474825	-0.0418574	-0.0557687	-0.464529	-0.0418574	-0.172795	-0.439073	-0.104703	0.825849	1.22004
ABL2_-_179112158.23-P1	-0.0138483	-0.435696	-0.912256	-0.0138483	-0.0854833	-0.444267	-0.0138483	-0.136431	-0.290607	-0.0369883	0.0212486	-0.0557707
ABL2_-_179198654.23-P2	-0.032686	0.0349291	-0.0203288	-0.032686	0.146268	0.521262	-0.032686	0.103156	0.103624	0.0137423	-0.0119128	0.0269928
ABL2_-_179198834.23-P2	0.0158805	-0.214548	-0.376781	0.0158805	-0.146186	-0.557606	0.0158805	-0.286101	-0.485314	0.0255886	0.00103809	0.0840503
ABLIM1_+_116417743.23-ENST00000277895.5	0.0354567	0.170835	0.459158	0.0354567	-0.092222	-0.197901	0.0354567	-0.0394584	0.0324145	0.0116367	0.210295	0.426188
ABLIM1_+_116417800.23-ENST00000277895.5	-0.0259326	0.678382	1.29718	-0.0259326	-0.0382635	-0.293953	-0.0259326	0.275137	0.444827	0.011031	0.0867562	0.199236
ABLIM1_+_116417821.23-ENST00000277895.5	-0.0671532	-0.190639	-0.579006	-0.0671532	-0.0736438	-0.689562	-0.0671532	0.202385	0.190339	0.0230835	-0.0298655	0.0206331
ABLIM1_+_116417829.23-ENST00000277895.5	0.00343951	0.272049	0.566637	0.00343951	0.412513	1.95566	0.00343951	0.103366	0.207741	0.0205994	0.244358	0.513597
ABLIM1_+_116417833.23-ENST00000277895.5	0.0273701	0.115864	0.323954	0.0273701	-0.248185	-0.964556	0.0273701	0.225747	0.505452	-0.0384077	0.135041	0.147694
ABLIM1_+_116418018.23-ENST00000277895.5	-0.00629693	0.151391	0.294036	-0.00629693	0.305466	1.40589	-0.00629693	-0.00787117	-0.0283627	-0.000499921	0.192059	0.358674
ABLIM1_-_116417795.23-ENST00000277895.5	-0.00451854	0.0681479	0.131588	-0.00451854	0.15032	0.698544	-0.00451854	0.217679	0.398796	0.0254884	0.392798	0.798042
ABLIM1_-_116417810.23-ENST00000277895.5	0.0235776	0.283465	0.650385	0.0235776	0.146058	0.836983	0.0235776	0.269566	0.576557	0.0208679	-0.0596802	-0.0399816
ABLIM1_-_116417816.23-ENST00000277895.5	-0.0870546	0.406806	0.565372	-0.0870546	0.140587	0.18897	-0.0870546	-0.0820973	-0.399128	-0.0273815	0.238738	0.367887
ABLIM1_-_116417819.23-ENST00000277895.5	0.0583404	-0.347216	-0.516173	0.0583404	-0.125911	-0.224865	0.0583404	-0.206633	-0.214701	0.016997	-0.157004	-0.228355
ABLIM2_+_8160016.23-P1P2	-0.0394158	0.0829755	0.0562322	-0.0394158	0.268172	1.04704	-0.0394158	0.199614	0.264794	0.0473294	0.0927967	0.312728
ABLIM2_+_8160086.23-P1P2	0.0474706	-0.407687	-0.67086	0.0474706	-0.20641	-0.658258	0.0474706	-0.359401	-0.531771	0.0428419	-0.0748579	-0.00561614
ABLIM2_+_8160141.23-P1P2	-0.131903	0.245805	0.105549	-0.131903	-0.0578993	-0.981223	-0.131903	-0.228425	-0.801709	-0.129257	0.392313	0.360274
ABLIM2_+_8160204.23-P1P2	-0.101179	0.377417	0.463529	-0.101179	0.260366	0.663296	-0.101179	-0.0118447	-0.308225	-0.0134678	0.106285	0.165675
ABLIM2_+_8160328.23-P1P2	-0.0454188	-0.175481	-0.482899	-0.0454188	0.00446626	-0.206063	-0.0454188	0.338378	0.507215	0.051572	0.292776	0.689318
ABLIM2_+_8160487.23-P1P2	-0.00965456	-0.289478	-0.604845	-0.00965456	-0.050767	-0.260142	-0.00965456	-0.0753927	-0.16435	0.0409187	-0.350167	-0.513002
ABLIM2_+_8160523.23-P1P2	0.0307438	-0.223444	-0.349888	0.0307438	0.351287	1.82625	0.0307438	-0.435996	-0.723123	0.040146	0.227738	0.538479
ABLIM2_-_8160138.23-P1P2	-0.0169347	0.206667	0.373386	-0.0169347	-0.0254462	-0.184042	-0.0169347	-0.273693	-0.556314	0.0160872	0.310329	0.621139
ABLIM2_-_8160157.23-P1P2	0.0172143	-0.0934884	-0.128712	0.0172143	0.19037	1.00606	0.0172143	-0.0011686	0.0516849	-0.0139444	0.138143	0.222414
ABLIM2_-_8160471.23-P1P2
ABLIM3_+_148521081.23-P1P2	0.0304236	-0.436066	-0.779483	0.0304236	-0.08755	-0.20463	0.0304236	-0.0857297	-0.0686202	0.00947642	-0.143497	-0.22496
ABLIM3_+_148521102.23-P1P2	0.0117248	-0.202646	-0.36532	0.0117248	-0.0259891	-0.0252368	0.0117248	-0.0212927	-0.00173308	-0.0693751	0.162972	0.11119
ABLIM3_+_148521122.23-P1P2	0.0121295	-0.0027917	0.0387892	0.0121295	0.137452	0.732755	0.0121295	-0.0329034	-0.022297	0.05265	0.0307925	0.214701
ABLIM3_+_148521137.23-P1P2	0.024314	0.16178	0.407299	0.024314	0.181667	1.00578	0.024314	0.099003	0.259512	0.0232775	0.262121	0.553543
ABLIM3_+_148521279.23-P1P2	-0.00547087	-0.017718	-0.0443823	-0.00547087	-0.0683372	-0.317833	-0.00547087	-0.209364	-0.403027	0.0346914	0.583779	1.17223
ABLIM3_+_148521297.23-P1P2	-0.107628	0.479905	0.650687	-0.107628	-0.0685562	-0.893859	-0.107628	0.228215	0.122462	-0.000499921	0.368466	0.680308
ABLIM3_+_148521451.23-P1P2	-0.00556255	0.0443923	0.0805502	-0.00556255	0.0485128	0.221937	-0.00556255	0.155352	0.279171	0.017719	-0.137476	-0.190713
ABLIM3_-_148521229.23-P1P2	-0.00800186	0.334984	0.659001	-0.00800186	-0.13842	-0.656125	-0.00800186	-0.19737	-0.387851	0.0125624	0.0550346	0.145723
ABLIM3_-_148521482.23-P1P2	0.0136183	0.0879483	0.226203	0.0136183	-0.111546	-0.410174	0.0136183	-0.0131032	0.0190278	0.0200575	-0.0580493	-0.039296
ABLIM3_-_148521503.23-P1P2	-0.0437561	-0.346688	-0.823022	-0.0437561	0.00277811	-0.20451	-0.0437561	0.0677477	0.00558303	-0.0228781	-0.0649866	-0.173162
ABO_+_136130684.23-P2	-0.135999	-0.199703	-0.80491	-0.135999	0.217083	0.267177	-0.135999	-0.179876	-0.722622	0.0035133	0.19779	0.380454
ABO_+_136150190.23-P1	0.0604176	-0.0733603	0.0421616	0.0604176	-0.313397	-1.08006	0.0604176	0.0925635	0.351123	-0.0458498	-0.428451	-0.900702
ABO_+_136150541.23-P1	0.0862221	-0.495889	-0.731797	0.0862221	0.00460948	0.535568	0.0862221	0.0362405	0.319821	0.00803659	-0.15796	-0.255395
ABO_+_136150587.23-P1	0.0145324	0.108347	0.270083	0.0145324	0.267971	1.34977	0.0145324	-0.1689	-0.269877	-0.0331942	0.320005	0.499647
ABO_+_136150601.23-P1	-0.0035848	0.0484579	0.0947108	-0.0035848	-0.0804481	-0.363215	-0.0035848	-0.0797343	-0.155047	0.0340322	0.0589771	0.213526
ABO_-_136130683.23-P2	0.0186742	0.133738	0.333759	0.0186742	-0.204002	-0.809211	0.0186742	-0.155242	-0.232427	-0.047339	0.144304	0.139367
ABO_-_136130692.23-P2	0.0487675	-0.107798	-0.0623971	0.0487675	-0.0781369	-0.0578532	0.0487675	-0.107139	-0.0560117	0.0176813	-0.13833	-0.192377
ABO_-_136130896.23-P2	0.0453149	-0.334225	-0.529268	0.0453149	0.103546	0.762772	0.0453149	-0.369402	-0.556676	-0.00221446	-0.152518	-0.274415
ABO_-_136130899.23-P2	0.00875889	0.156098	0.348931	0.00875889	0.0200018	0.17072	0.00875889	0.10246	0.221319	0.0359396	0.094402	0.283499
ABO_-_136130921.23-P2	0.00190038	0.192736	0.402105	0.00190038	0.368667	1.74426	0.00190038	0.0540903	0.111116	0.0458061	-0.0526538	0.043236
ABO_-_136130928.23-P2	-0.0373957	-0.222301	-0.553086	-0.0373957	-0.132161	-0.792637	-0.0373957	-0.0862521	-0.264321	-0.0131489	0.0127078	-0.00403844
ABO_-_136130955.23-P2	0.0247166	0.144474	0.373626	0.0247166	-0.0111277	0.116606	0.0247166	-0.0882252	-0.0896757	0.0437338	-0.275684	-0.369254
ABO_-_136130959.23-P2	0.056891	-0.317442	-0.460522	0.056891	-0.181288	-0.489075	0.056891	0.200407	0.542797	0.00914628	-0.278978	-0.472909
ABO_-_136130966.23-P2	-0.00209911	-0.133506	-0.267632	-0.00209911	-0.0811476	-0.358087	-0.00209911	-0.0545537	-0.103663	-0.0181087	-0.255662	-0.507345
ABO_-_136150162.23-P1	-0.0498111	-0.0264345	-0.19568	-0.0498111	0.342161	1.33063	-0.0498111	0.0940705	0.0374535	-0.0716516	0.330546	0.41029
ABO_-_136150207.23-P1	0.0509586	-0.340449	-0.524795	0.0509586	-0.0892431	-0.0968721	0.0509586	0.118661	0.372799	0.00836284	0.1802	0.362075
ABO_-_136150219.23-P1	0.021745	0.112039	0.299277	0.021745	0.0990767	0.609439	0.021745	0.0291514	0.121429	-0.0372789	-0.144546	-0.358875
ABO_-_136150446.23-P1	-0.0294906	-0.0666247	-0.215416	-0.0294906	0.0506941	0.0973385	-0.0294906	0.0881524	0.0847237	0.00605686	-0.138503	-0.225511
ABO_-_136150600.23-P1	0.00986362	-0.000322563	0.0369329	0.00986362	0.329931	1.60998	0.00986362	0.0757421	0.174496	0.0121254	0.388725	0.752889
ABO_-_136150606.23-P1	0.0381202	0.133105	0.39113	0.0381202	0.0483685	0.467147	0.0381202	0.00964762	0.13195	0.0713549	0.0273555	0.261243
ABRACL_+_139349873.23-P1P2	0.0701836	-0.32678	-0.439257	0.0701836	0.055443	0.680334	0.0701836	-0.266766	-0.293218	0.050549	0.0437711	0.232433
ABRACL_+_139349876.23-P1P2	-0.0558689	0.0366555	-0.0867662	-0.0558689	-0.351675	-1.9116	-0.0558689	0.256412	0.323835	-0.031416	-0.0289594	-0.13158
ABRACL_+_139349879.23-P1P2	0.100138	-0.224535	-0.1428	0.100138	-0.325652	-0.913152	0.100138	0.119705	0.515957	0.0394051	0.054755	0.220997
ABRACL_+_139349931.23-P1P2	0.0565796	-0.0646608	0.0481241	0.0565796	0.332523	1.88491	0.0565796	-0.046981	0.0789864	0.0308814	-0.213945	-0.292973
ABRACL_+_139350209.23-P1P2	-0.0052579	-0.173921	-0.358633	-0.0052579	-0.277744	-1.28488	-0.0052579	-0.0566196	-0.116598	0.00248168	-0.175711	-0.303442
ABRACL_+_139350231.23-P1P2	0.00265603	0.28346	0.587277	0.00265603	0.25747	1.23436	0.00265603	-0.240308	-0.437595	0.00596727	0.127816	0.259802
ABRACL_-_139350061.23-P1P2	-0.00224931	-0.140966	-0.283123	-0.00224931	-0.173943	-0.787997	-0.00224931	-0.0949917	-0.179762	0.0075153	0.0606546	0.141721
ABRACL_-_139350119.23-P1P2	0.056086	0.279967	0.741375	0.056086	0.497157	2.64336	0.056086	0.19696	0.534034	0.0366793	-0.373466	-0.567451
ABRACL_-_139350292.23-P1P2	0.0576414	0.111073	0.405591	0.0576414	0.0308208	0.49589	0.0576414	-0.107544	-0.031291	0.0513893	0.0213808	0.193982
ABRACL_-_139350417.23-P1P2	0.0407535	-0.0118648	0.106826	0.0407535	-0.189539	-0.618059	0.0407535	-0.00205893	0.117605	0.0353206	-0.203047	-0.260571
ABRA_+_107782019.23-P1P2	-0.0466866	0.117295	0.10349	-0.0466866	0.216037	0.765055	-0.0466866	0.0936189	0.0455793	-0.00521811	-0.0409997	-0.0795697
ABRA_+_107782028.23-P1P2	0.0528857	0.0819238	0.332486	0.0528857	-0.0866554	-0.0740601	0.0528857	-0.237725	-0.288542	-0.00425593	-0.014691	-0.0288859
ABRA_+_107782269.23-P1P2	0.020533	-0.0667195	-0.0647395	0.020533	-0.253508	-1.02765	0.020533	0.130665	0.307902	0.075983	-0.276112	-0.278986
ABRA_+_107782392.23-P1P2	0.0777031	0.142804	0.530062	0.0777031	-0.0417168	0.273415	0.0777031	-0.045267	0.142844	0.0499781	-0.397035	-0.572877
ABRA_+_107782399.23-P1P2	0.0322706	-0.254042	-0.406967	0.0322706	0.030485	0.351532	0.0322706	0.00714493	0.110471	-0.0394242	0.00957888	-0.0839246
ABRA_+_107782407.23-P1P2	-0.0396617	-0.0931269	-0.299517	-0.0396617	0.266978	1.04014	-0.0396617	0.226378	0.31417	-0.00737559	0.269743	0.480899
ABRA_+_107782422.23-P1P2	-0.0462265	0.336941	0.547665	-0.0462265	0.181482	0.607869	-0.0462265	-0.274837	-0.642559	-0.0198392	0.0479017	0.0412404
ABRA_-_107782347.23-P1P2	-0.0114463	-0.399137	-0.831312	-0.0114463	-0.189887	-0.913485	-0.0114463	0.118261	0.192872	-0.0658379	0.107396	0.0198472
ABRA_-_107782350.23-P1P2	0.0560266	-0.130945	-0.0871677	0.0560266	0.364526	2.02977	0.0560266	0.139852	0.427003	0.0241182	0.0835379	0.230316
ABRA_-_107782371.23-P1P2	0.00684833	-0.239163	-0.453644	0.00684833	-0.254619	-1.10981	0.00684833	0.15211	0.308738	0.0577794	0.0291839	0.22625
ABR_+_1082842.23-P1P2	0.00633638	-0.00190674	0.0231015	0.00633638	-0.0745963	-0.280315	0.00633638	0.0183956	0.0570609	0.0109938	-0.336168	-0.571963
ABR_+_1082862.23-P1P2	0.0735229	-0.0819953	0.0642787	0.0735229	-0.022298	0.339674	0.0735229	-0.450843	-0.628078	0.0496684	-0.351812	-0.491298
ABR_+_1082896.23-P1P2	-0.0436224	0.121735	0.121681	-0.0436224	-0.0667553	-0.525263	-0.0436224	-0.303235	-0.688219	-0.0473509	-0.100406	-0.306833
ABR_+_1083212.23-P1P2	0.0069765	-0.237256	-0.449411	0.0069765	-0.172199	-0.728005	0.0069765	0.271875	0.533212	0.0317598	-0.114412	-0.10902
ABR_+_1083246.23-P1P2	-0.057243	-0.191009	-0.549863	-0.057243	0.195995	0.612965	-0.057243	0.255101	0.317438	-0.087197	0.00854603	-0.220682
ABR_+_1083266.23-P1P2	0.0455247	-0.225817	-0.310093	0.0455247	-0.0448434	0.0778357	0.0455247	-0.00706665	0.121934	0.0168665	0.395571	0.778756
ABR_-_1082914.23-P1P2	-0.0248493	0.0261888	-0.0143135	-0.0248493	-0.128722	-0.706116	-0.0248493	-0.107514	-0.268083	-0.0377899	-0.0577857	-0.202133
ABR_-_1083030.23-P1P2	-0.0137089	0.258871	0.488352	-0.0137089	0.035546	0.116128	-0.0137089	-0.166214	-0.345937	-0.00603511	0.298949	0.537933
ABR_-_1083256.23-P1P2	0.0312721	0.603773	1.3193	0.0312721	0.720296	3.53544	0.0312721	-0.211549	-0.301618	0.0709871	0.107338	0.406033
ABR_-_1083263.23-P1P2	0.0129128	0.0279545	0.103133	0.0129128	0.0585721	0.372441	0.0129128	0.106342	0.24051	-0.00331209	0.183263	0.334698
ABT1_+_26597184.23-P1P2	-0.0560936	0.119178	0.0789144	-0.0560936	0.408781	1.60331	-0.0560936	-0.316344	-0.748558	0.0178735	0.128621	0.294883
ABT1_+_26597384.23-P1P2	0.0718642	-0.101411	0.0201364	0.0718642	-0.105774	-0.0556331	0.0718642	-0.0803584	0.0604155	-0.0128833	0.213783	0.363321
ABT1_+_26597401.23-P1P2	0.0421968	0.359837	0.860497	0.0421968	-0.120078	-0.288761	0.0421968	0.014564	0.152854	-0.0854675	-0.184078	-0.567001
ABT1_+_26597412.23-P1P2	-0.0693523	0.188671	0.179019	-0.0693523	0.0701582	-0.0370342	-0.0693523	-0.0199111	-0.231937	-0.0279305	0.276482	0.435154
ABT1_-_26597183.23-P1P2	-0.0545305	0.200113	0.246787	-0.0545305	0.256745	0.909127	-0.0545305	0.199938	0.222003	-0.0104036	0.0245278	0.0252631
ABT1_-_26597263.23-P1P2	-0.0884764	-0.119539	-0.499982	-0.0884764	0.388499	1.32725	-0.0884764	0.150855	0.0326927	-0.0247034	0.148682	0.211255
ABT1_-_26597427.23-P1P2	-0.0170005	-0.117471	-0.280248	-0.0170005	-0.0602244	-0.345219	-0.0170005	0.105312	0.152696	-0.0789829	0.0080593	-0.198379
ABT1_-_26597485.23-P1P2	0.0362347	0.50666	1.1385	0.0362347	0.029115	0.367511	0.0362347	-0.363943	-0.572531	0.0356537	-0.319159	-0.471332
ABT1_-_26597617.23-P1P2	0.00714871	0.102871	0.236774	0.00714871	0.1394	0.713724	0.00714871	-0.560381	-1.02362	-0.0183295	-0.454533	-0.870559
ABT1_-_26597649.23-P1P2	-0.1711	0.00521284	-0.497678	-0.1711	0.013435	-0.872016	-0.1711	0.0774014	-0.341984	-0.165393	0.390225	0.254444
ABTB1_+_127391808.23-P1P2	0.0613294	0.153055	0.501345	0.0613294	0.289147	1.71109	0.0613294	0.245588	0.640082	0.0337482	-0.0270017	0.0559635
ABTB1_+_127391828.23-P1P2	0.0416707	-0.231908	-0.333996	0.0416707	0.267989	1.50261	0.0416707	0.0273611	0.17529	0.0268768	-0.363524	-0.576998
ABTB1_+_127391831.23-P1P2	-0.046466	-0.0874006	-0.308495	-0.046466	0.0564685	0.0284882	-0.046466	-0.0897541	-0.296917	-0.048577	-0.0397239	-0.199656
ABTB1_+_127391861.23-P1P2	-0.0644768	0.0722161	-0.0410395	-0.0644768	-0.174658	-1.14156	-0.0644768	-0.355635	-0.84615	-0.00563469	-0.0596776	-0.1148
ABTB1_+_127392211.23-P1P2	-0.019159	-0.218656	-0.490739	-0.019159	-0.201914	-1.01251	-0.019159	-0.135669	-0.304429	-0.0283106	0.0370127	-0.00252949
ABTB1_+_127392221.23-P1P2	0.0207266	-0.0985125	-0.128248	0.0207266	0.0892429	0.558237	0.0207266	-0.0150535	0.0357878	0.0549263	0.0469393	0.250567
ABTB1_-_127391845.23-P1P2	0.0442464	-0.355916	-0.576218	0.0442464	-0.132513	-0.334721	0.0442464	0.192368	0.491448	-0.0167403	0.101714	0.148102
ABTB1_-_127392172.23-P1P2	0.0406061	-0.231304	-0.33599	0.0406061	-0.19829	-0.659349	0.0406061	-0.423004	-0.670497	0.0783877	0.0930606	0.400895
ABTB1_-_127392198.23-P1P2	-0.0305732	0.128009	0.173684	-0.0305732	0.229245	0.91682	-0.0305732	-0.226603	-0.507359	0.124987	-0.230939	-0.0582748
ABTB1_-_127392210.23-P1P2	0.00306592	-0.0383623	-0.0602532	0.00306592	0.0155481	0.118083	0.00306592	-0.0380727	-0.0579934	-0.131166	0.146205	-0.0938296
ABTB2_+_34379321.23-P1P2	-0.0507569	-0.220047	-0.588839	-0.0507569	-0.135805	-0.884689	-0.0507569	-0.00624155	-0.152967	0.00906854	-0.271122	-0.458803
ABTB2_+_34379353.23-P1P2	0.002253	-0.202646	-0.393887	0.002253	-0.0936313	-0.391312	0.002253	0.0887082	0.176906	-0.0147924	0.324126	0.559113
ABTB2_-_34379074.23-P1P2	-0.0306329	0.300902	0.522043	-0.0306329	-0.00287365	-0.156776	-0.0306329	-0.0511088	-0.179143	-0.0391202	0.0500953	-0.00919518
ABTB2_-_34379083.23-P1P2	0.0640769	0.109474	0.421777	0.0640769	-0.354656	-1.25024	0.0640769	0.0161886	0.218716	0.00208173	-0.16455	-0.284223
ABTB2_-_34379146.23-P1P2	0.0287116	0.0718095	0.239189	0.0287116	0.104069	0.671736	0.0287116	-0.0180169	0.0531695	0.00156421	-0.0751818	-0.122744
ABTB2_-_34379166.23-P1P2	-0.0873814	0.201828	0.151169	-0.0873814	0.389784	1.33936	-0.0873814	0.0583654	-0.137231	0.0322636	-0.364817	-0.564147
ABTB2_-_34379310.23-P1P2	0.0145519	0.195832	0.446502	0.0145519	0.174546	0.917904	0.0145519	-0.0959399	-0.133297	0.0157558	0.24057	0.493015
ABTB2_-_34379384.23-P1P2	-0.0622627	-0.364838	-0.915426	-0.0622627	0.311054	1.11672	-0.0622627	0.0205206	-0.135925	-0.00513771	-0.216039	-0.398483
ABTB2_-_34379465.23-P1P2	0.0219144	0.0501068	0.174938	0.0219144	0.0567354	0.414616	0.0219144	0.193461	0.429373	0.00265725	-0.0990189	-0.163119
ABTB2_-_34379521.23-P1P2	-0.011472	0.114966	0.204999	-0.011472	-0.200589	-0.963115	-0.011472	0.210326	0.365072	-0.0401316	0.0567783	0.000134144
ACAA1_+_38178110.23-P1P2	-0.0491634	0.236513	0.336354	-0.0491634	-0.0689788	-0.566733	-0.0491634	0.0784624	0.010107	-0.0652858	0.251304	0.283785
ACAA1_+_38178133.23-P1P2	0.0107257	-0.359098	-0.683727	0.0107257	0.0208423	0.185677	0.0107257	-0.406716	-0.725811	-0.018767	0.474332	0.821754
ACAA1_+_38178488.23-P1P2	0.0184181	0.425289	0.920729	0.0184181	0.130627	0.736592	0.0184181	0.132438	0.305148	-0.00816844	0.208987	0.367887
ACAA1_+_38178517.23-P1P2	0.00454566	0.0555163	0.133461	0.00454566	-0.0963749	-0.391093	0.00454566	-0.311763	-0.565877	-0.0453667	-0.150021	-0.391692
ACAA1_+_38178570.23-P1P2	0.00652734	0.0598907	0.148256	0.00652734	0.551308	2.61479	0.00652734	-0.24689	-0.438797	0.00252331	-0.14486	-0.247076
ACAA1_-_38178165.23-P1P2	0.0750317	-0.467155	-0.70762	0.0750317	0.286494	1.77595	0.0750317	-0.0408243	0.143487	0.0118834	0.194047	0.397259
ACAA1_-_38178168.23-P1P2	-0.010663	0.0839051	0.144822	-0.010663	-0.171694	-0.824955	-0.010663	0.0683701	0.101765	0.014286	0.0765436	0.189805
ACAA1_-_38178171.23-P1P2	0.0181476	-0.0733961	-0.0853933	0.0181476	-0.144793	-0.538404	0.0181476	-0.350516	-0.599339	-0.105575	-0.04119	-0.363249
ACAA1_-_38178499.23-P1P2	0.0201378	-0.36942	-0.676149	0.0201378	-0.137068	-0.491484	0.0201378	0.225182	0.483629	0.02947	0.116623	0.305748
ACAA1_-_38178575.23-P1P2	-0.00596231	-0.028276	-0.0671485	-0.00596231	-0.268989	-1.24837	-0.00596231	-0.122246	-0.241422	-0.0126799	0.0756105	0.111973
ACAA2_+_47339402.23-P1P2	-0.0233882	0.270852	0.483313	-0.0233882	0.367714	1.59751	-0.0233882	-0.104304	-0.257883	-0.0526168	-0.0143906	-0.164873
ACAA2_+_47339407.23-P1P2	-0.0156983	-0.0938737	-0.228751	-0.0156983	0.34347	1.5287	-0.0156983	-0.130593	-0.284994	0.0353067	0.0106062	0.128932
ACAA2_+_47339850.23-P1P2	0.0309295	-0.00825821	0.0844683	0.0309295	0.0531894	0.448964	0.0309295	0.173264	0.417465	0.0299961	0.133327	0.33769
ACAA2_-_47339441.23-P1P2	0.0812072	0.128464	0.511721	0.0812072	-0.152548	-0.219319	0.0812072	-0.132484	-0.0102964	0.0504938	0.12396	0.37848
ACAA2_-_47339449.23-P1P2	-0.0278295	0.077101	0.079333	-0.0278295	-0.114448	-0.656889	-0.0278295	-0.186372	-0.424201	-0.0138892	-0.106737	-0.223905
ACAA2_-_47339655.23-P1P2	-0.134544	0.0294506	-0.338567	-0.134544	0.622605	2.15041	-0.134544	0.320729	0.218295	-0.0561871	-0.311904	-0.717392
ACAA2_-_47339855.23-P1P2	0.013886	0.262475	0.578843	0.013886	0.0139957	0.171808	0.013886	0.127159	0.282256	-0.0219041	-0.206302	-0.428065
ACAA2_-_47339858.23-P1P2	-0.0264534	0.25387	0.439834	-0.0264534	0.100334	0.343956	-0.0264534	-0.381833	-0.785998	-0.00183395	0.0123392	0.0272346
ACAA2_-_47339876.23-P1P2	0.0531275	0.0977356	0.36509	0.0531275	0.360291	1.99387	0.0531275	-0.0318966	0.0973008	-0.0298401	0.253909	0.388608
ACAA2_-_47339894.23-P1P2	-0.0644768	0.613745	1.05064	-0.0644768	-0.0985878	-0.789833	-0.0644768	-0.0223713	-0.222542	-0.0447752	0.0337832	-0.0549015
ACACA_+_35715534.23-P1P2	-0.00248098	-0.356415	-0.718148	-0.00248098	-0.169691	-0.769642	-0.00248098	0.119083	0.220151	-0.0561078	0.561874	0.875943
ACACA_+_35715655.23-P1P2	-0.0754997	0.160841	0.104377	-0.0754997	-0.0373655	-0.5688	-0.0754997	0.0965416	-0.0316802	-0.110696	0.108318	-0.105116
ACACA_+_35715673.23-P1P2	0.0446685	-0.294692	-0.451522	0.0446685	-0.156718	-0.444267	0.0446685	-0.467976	-0.742984	0.0362028	0.0895519	0.275399
ACACA_+_35715687.23-P1P2	0.0217804	0.0964082	0.267874	0.0217804	-0.303724	-1.25282	0.0217804	0.000771586	0.0684257	0.00261688	-0.342873	-0.607839
ACACA_-_35715615.23-P1P2	0.0113956	-0.205581	-0.372231	0.0113956	0.374577	1.82503	0.0113956	0.0449732	0.121319	0.0337545	0.228958	0.522659
ACACA_-_35715847.23-P1P2	0.0566826	0.0696418	0.319177	0.0566826	0.423824	2.30765	0.0566826	-0.131761	-0.0793591	-0.0137512	0.377817	0.659945
ACACA_-_35715962.23-P1P2	0.0541523	0.0173067	0.206043	0.0541523	-0.00106188	0.328833	0.0541523	-0.0164622	0.129124	0.0353483	0.310119	0.675135
ACACA_-_35715992.23-P1P2	0.0324976	-0.00122343	0.103379	0.0324976	0.253949	1.38605	0.0324976	0.116315	0.315404	0.0852634	-0.168405	-0.0564084
ACACA_-_35716002.23-P1P2	0.0923571	-0.0651032	0.155134	0.0923571	-0.169141	-0.233279	0.0923571	-0.557543	-0.773659	0.0200836	0.11041	0.26792
ACACA_-_35716041.23-P1P2	0.0123425	-0.123514	-0.203934	0.0123425	0.345796	1.69729	0.0123425	-0.181076	-0.298948	0.0116539	0.0989802	0.223282
ACACB_+_109569160.23-P1	0.0514724	0.456696	1.08373	0.0514724	0.0117021	0.372766	0.0514724	0.199249	0.525071	0.0162163	-0.131978	-0.18493
ACACB_+_109569170.23-P1	-0.0104034	0.0338948	0.0447888	-0.0104034	0.0249442	0.085714	-0.0104034	-0.206822	-0.412433	0.0424656	0.2203	0.531466
ACACB_+_109569423.23-P1	0.0189114	-0.0553139	-0.0466376	0.0189114	-0.190321	-0.744618	0.0189114	0.0857242	0.219153	0.0318875	-0.0251056	0.0541675
ACACB_+_109569572.23-P1	-0.00514964	0.23774	0.471568	-0.00514964	-0.224389	-1.03757	-0.00514964	0.295842	0.543243	-0.0725462	-0.231091	-0.616237
ACACB_+_109592523.23-P2	-0.0485089	0.158156	0.180365	-0.0485089	0.143003	0.417105	-0.0485089	0.099569	0.0514812	-0.114182	0.340777	0.308871
ACACB_+_109592546.23-P2	0.0208549	0.0670569	0.205913	0.0208549	0.00868192	0.186465	0.0208549	-0.153451	-0.222815	-0.00410397	0.0179048	0.0309732
ACACB_+_109592574.23-P2	0.0291977	0.0554005	0.207576	0.0291977	0.224716	1.23231	0.0291977	-0.0534751	-0.0117849	-0.00796619	-0.139864	-0.267583
ACACB_+_109592577.23-P2	0.0372405	0.0339963	0.188683	0.0372405	0.361086	1.90813	0.0372405	-0.138143	-0.147123	-0.0291902	0.138603	0.180211
ACACB_+_109592655.23-P2	-0.0151687	-0.344774	-0.732946	-0.0151687	-0.0234873	-0.165045	-0.0151687	0.198332	0.332014	-0.0505159	0.174899	0.18618
ACACB_+_109592908.23-P2	-0.0288496	-0.314224	-0.712622	-0.0288496	0.12645	0.451222	-0.0288496	-0.0552898	-0.181847	0.122811	-0.530936	-0.611385
ACACB_-_109569178.23-P1	0.0615973	0.105118	0.405516	0.0615973	-0.158484	-0.357142	0.0615973	-0.0925332	0.00815551	0.0246267	0.336364	0.692715
ACACB_-_109569213.23-P1	0.0694338	-0.109022	-0.00253666	0.0694338	-0.245149	-0.713754	0.0694338	-0.342059	-0.43626	-0.0230586	0.165887	0.247268
ACACB_-_109569231.23-P1	0.0324315	-0.0574577	-0.0101838	0.0324315	0.00602389	0.239336	0.0324315	0.157285	0.391878	-0.0321666	0.00681214	-0.0684792
ACACB_-_109569253.23-P1	0.0574009	-0.140532	-0.102348	0.0574009	0.110909	0.864843	0.0574009	-0.466532	-0.703725	-0.00986777	-0.299404	-0.563831
ACACB_-_109569626.23-P1	0.00760537	-0.263393	-0.500205	0.00760537	0.3732	1.79733	0.00760537	-0.352003	-0.63239	-0.078138	0.314127	0.362043
ACACB_-_109569639.23-P1	0.0292349	-0.479238	-0.870097	0.0292349	-0.180072	-0.639119	0.0292349	-0.34896	-0.564593	-0.014145	-0.0502053	-0.121556
ACACB_-_109592496.23-P2	-0.0181153	-0.00824081	-0.0634115	-0.0181153	-0.118875	-0.622678	-0.0181153	0.0144526	-0.0205231	0.0229034	0.138831	0.327699
ACACB_-_109592519.23-P2	0.0388082	-0.0595079	0.0049147	0.0388082	-0.0634828	-0.0461535	0.0388082	-0.344047	-0.527912	0.00486384	-0.417676	-0.737879
ACACB_-_109592529.23-P2	0.0317557	-0.0534067	-0.00405565	0.0317557	0.100367	0.671753	0.0317557	0.133677	0.345762	0.019566	-0.0500616	-0.02612
ACACB_-_109592941.23-P2	0.0681834	-0.0542696	0.104068	0.0681834	0.215799	1.41052	0.0681834	-0.372952	-0.497657	0.00246129	0.221016	0.419831
ACAD10_+_112123853.23-P1P2	-0.0158159	-0.269083	-0.582313	-0.0158159	0.0653586	0.242115	-0.0158159	0.0103599	-0.0215795	0.0367157	0.0231806	0.155836
ACAD10_+_112123992.23-P1P2	0.015312	0.0115363	0.0772712	0.015312	-0.137858	-0.5223	0.015312	0.0505178	0.142939	0.0329872	-0.277013	-0.402017
ACAD10_+_112124115.23-P1P2	0.0484155	-0.13547	-0.119243	0.0484155	-0.133812	-0.317265	0.0484155	0.122972	0.373564	0.0182758	0.0626893	0.17581
ACAD10_-_112123838.23-P1P2	-0.028437	0.0847031	0.0928261	-0.028437	-0.114047	-0.658455	-0.028437	-0.0177272	-0.110374	-0.0486693	-0.103424	-0.316057
ACAD10_-_112123885.23-P1P2	0.0358256	0.219934	0.55925	0.0358256	0.27534	1.50369	0.0358256	-0.0235361	0.0632676	0.0426975	-0.0369785	0.0630394
ACAD10_-_112123894.23-P1P2	-0.0258723	0.0434658	0.01743	-0.0258723	0.00707111	-0.0839976	-0.0258723	-0.326191	-0.680212	-0.0115546	0.124726	0.204699
ACAD10_-_112123907.23-P1P2	0.0493932	0.236423	0.63341	0.0493932	0.166885	1.07859	0.0493932	-0.0219843	0.105127	0.0205567	0.322205	0.65541
ACAD10_-_112123925.23-P1P2	0.0234249	0.0835275	0.246867	0.0234249	-0.0362119	-0.00664784	0.0234249	0.119478	0.295272	0.0185373	-0.298241	-0.481517
ACAD10_-_112124129.23-P1P2	-0.037938	0.0378363	-0.0303079	-0.037938	0.0962052	0.260223	-0.037938	-0.433779	-0.916175	-0.0304698	-0.379229	-0.767536
ACAD10_-_112124210.23-P1P2	-0.0860757	-0.00634936	-0.264561	-0.0860757	-0.119951	-1.01018	-0.0860757	0.198984	0.129646	-0.033043	0.174749	0.235236
ACAD11_+_132378245.23-P1P2	0.0295208	-0.173852	-0.253603	0.0295208	-0.134673	-0.427596	0.0295208	0.184498	0.434442	0.0890079	-0.150907	-0.0139349
ACAD11_+_132378251.23-P1P2	-0.114863	-0.0287079	-0.396455	-0.114863	0.0251814	-0.501163	-0.114863	0.3826	0.390574	-0.00241826	-0.318761	-0.578091
ACAD11_+_132378312.23-P1P2	-0.0489486	-0.0698056	-0.280511	-0.0489486	0.363464	1.43399	-0.0489486	0.130744	0.108554	0.0369815	0.229598	0.532936
ACAD11_+_132378627.23-P1P2	0.00397869	-0.130262	-0.242761	0.00397869	-0.276542	-1.22734	0.00397869	-0.102425	-0.17579	-0.0133783	-0.250004	-0.483673
ACAD11_+_132379379.23-P1P2	-0.0252099	-0.057645	-0.184403	-0.0252099	0.282054	1.19119	-0.0252099	-0.0797211	-0.217112	0.0136561	-0.139632	-0.206113
ACAD11_-_132378357.23-P1P2	-0.0309298	-0.139973	-0.36762	-0.0309298	0.00210798	-0.135413	-0.0309298	0.214767	0.317514	-0.0147308	0.0690178	0.0941625
ACAD11_-_132378588.23-P1P2	-0.0322688	0.0734669	0.0586183	-0.0322688	0.584888	2.55169	-0.0322688	0.300894	0.474831	-0.161851	0.424223	0.326431
ACAD11_-_132378623.23-P1P2	0.13105	0.272092	0.951586	0.13105	-0.210141	-0.205066	0.13105	-0.246851	-0.0811936	0.0813704	-0.339119	-0.378654
ACAD11_-_132378633.23-P1P2	0.0557355	0.0784065	0.33399	0.0557355	-0.286494	-0.982027	0.0557355	-0.272521	-0.345471	0.0421963	0.344426	0.757018
ACAD11_-_132379444.23-P1P2	0.0928596	-0.167636	-0.0500479	0.0928596	0.118929	1.10152	0.0928596	-0.0498221	0.177838	0.106702	-0.0518213	0.216679
ACAD8_+_134123511.23-P1P2	0.0174001	-0.0796969	-0.10035	0.0174001	0.278836	1.41615	0.0174001	0.0387366	0.126889	-0.0227998	0.238861	0.381048
ACAD8_+_134123936.23-P1P2	0.0122976	0.477239	1.007	0.0122976	0.0881889	0.505919	0.0122976	-0.0217122	-0.000873359	0.0590701	0.128553	0.411068
ACAD8_-_134123445.23-P1P2	-0.00987669	-0.0284235	-0.0792513	-0.00987669	0.279794	1.26704	-0.00987669	0.192478	0.336255	0.000553109	-0.106259	-0.182259
ACAD8_-_134123448.23-P1P2	0.0278541	0.311192	0.719178	0.0278541	-0.265274	-1.04085	0.0278541	0.0155631	0.113543	-0.0379012	0.105275	0.0948525
ACAD8_-_134123455.23-P1P2	-0.0187042	0.140442	0.234545	-0.0187042	-0.242323	-1.19679	-0.0187042	0.129166	0.192439	0.0164866	-0.0778399	-0.0854606
ACAD8_-_134123480.23-P1P2	-0.0139334	-0.411194	-0.863118	-0.0139334	-0.217048	-1.05307	-0.0139334	0.268485	0.466832	-0.0394288	0.111204	0.10135
ACAD8_-_134123488.23-P1P2	0.0232514	-0.257888	-0.44192	0.0232514	-0.224748	-0.879371	0.0232514	-0.0523209	-0.0266981	0.0821828	-0.161244	-0.0520499
ACAD8_-_134123502.23-P1P2	-0.0161201	0.219651	0.402016	-0.0161201	0.276042	1.21455	-0.0161201	-0.0335635	-0.104643	-0.00407437	0.0280526	0.0495587
ACAD8_-_134123507.23-P1P2	-0.00576649	-0.0443019	-0.0988648	-0.00576649	-0.205817	-0.95517	-0.00576649	-0.0206389	-0.0507309	0.0118834	-0.164759	-0.256932
ACAD8_-_134123648.23-P1P2	-0.103014	0.23897	0.178897	-0.103014	-0.041216	-0.741474	-0.103014	0.315968	0.299914	-0.0809407	0.0467204	-0.133418
ACAD9_+_128598584.23-P1P2	-0.0764321	0.567915	0.922192	-0.0764321	-0.0605599	-0.681293	-0.0764321	0.102914	-0.0224326	-0.0859209	0.24078	0.20634
ACAD9_+_128598604.23-P1P2	0.0547708	0.107204	0.389134	0.0547708	0.216371	1.33767	0.0547708	-0.216785	-0.243946	0.00326533	-0.221268	-0.384292
ACAD9_+_128598694.23-P1P2	-0.114263	0.21044	0.0874577	-0.114263	0.0137406	-0.550683	-0.114263	0.419763	0.46184	-0.00101226	-0.0825072	-0.143374
ACAD9_+_128598781.23-P1P2	-0.0149304	0.186356	0.338484	-0.0149304	-0.0620743	-0.34212	-0.0149304	0.216346	0.366407	-0.0809973	-0.223861	-0.626913
ACAD9_-_128598499.23-P1P2	0.0064816	-0.0672318	-0.10815	0.0064816	0.028951	0.199281	0.0064816	-0.167753	-0.290845	-0.0515814	-0.0910585	-0.301734
ACAD9_-_128598508.23-P1P2	-0.150226	0.141339	-0.160306	-0.150226	0.224972	0.223574	-0.150226	0.0349573	-0.361472	-0.202199	0.148325	-0.290511
ACAD9_-_128598528.23-P1P2	-0.0602354	-0.0573597	-0.289462	-0.0602354	0.195934	0.595842	-0.0602354	-0.0845395	-0.326694	0.00582752	0.14466	0.290118
ACAD9_-_128598541.23-P1P2	0.0258888	-0.285709	-0.490051	0.0258888	-0.117047	-0.36654	0.0258888	0.0830105	0.234108	0.0159149	-0.0253526	0.00862237
ACAD9_-_128598801.23-P1P2	0.0794532	-0.371453	-0.501358	0.0794532	-0.092367	0.0490719	0.0794532	-0.146797	-0.0421164	0.0429786	0.157875	0.419099
ACAD9_-_128598823.23-P1P2	0.0617914	-0.0270923	0.139577	0.0617914	-0.193392	-0.517458	0.0617914	0.223311	0.599724	0.037285	0.218104	0.512836
ACADL_+_211089708.23-P1P2	-0.0351752	0.187129	0.278986	-0.0351752	0.187622	0.698462	-0.0351752	0.134871	0.155822	0.0237044	-0.407892	-0.66685
ACADL_+_211089722.23-P1P2	0.00347307	-0.112026	-0.207525	0.00347307	0.0794598	0.415887	0.00347307	-0.183322	-0.328617	0.0243291	-0.430041	-0.705469
ACADL_+_211090089.23-P1P2	-0.0680032	0.185021	0.175729	-0.0680032	0.211293	0.623135	-0.0680032	0.216863	0.214991	-0.0128523	0.206755	0.350595
ACADL_-_211089616.23-P1P2	0.0439765	-0.0807727	-0.022366	0.0439765	-0.258496	-0.918756	0.0439765	0.0439382	0.212929	0.0619184	-0.0864041	0.0271897
ACADL_-_211089695.23-P1P2	-0.0056051	0.100949	0.194435	-0.0056051	0.00171841	0.00533134	-0.0056051	-0.0774034	-0.156486	-0.0117121	-0.0804538	-0.169838
ACADL_-_211090002.23-P1P2	-0.00257132	0.167841	0.338433	-0.00257132	-0.018631	-0.0716834	-0.00257132	0.0492471	0.0892147	0.0116551	-0.137773	-0.208374
ACADL_-_211090030.23-P1P2	0.0305312	-0.0334539	0.0324747	0.0305312	-0.0546288	-0.0518036	0.0305312	0.0102843	0.111351	-0.0472242	0.197112	0.235973
ACADL_-_211090048.23-P1P2	-0.0444223	-0.0449116	-0.216677	-0.0444223	-0.0392698	-0.402679	-0.0444223	0.253811	0.351834	-0.0846458	0.356584	0.421078
ACADL_-_211090061.23-P1P2	-0.0495317	0.151132	0.163121	-0.0495317	-0.0249202	-0.36509	-0.0495317	0.173597	0.187067	-0.0654776	-0.132826	-0.417119
ACADL_-_211090095.23-P1P2	-0.0495624	0.113233	0.0866284	-0.0495624	0.0395445	-0.0671928	-0.0495624	0.207437	0.2503	0.0179228	0.0758214	0.198756
ACADM_+_76190107.23-P1P2	-0.0509307	-0.360396	-0.872296	-0.0509307	0.184168	0.59381	-0.0509307	0.321864	0.460489	0.0111756	0.0993425	0.222592
ACADM_+_76190432.23-P1P2	-0.0151992	0.385971	0.740082	-0.0151992	-0.0758573	-0.407363	-0.0151992	0.182064	0.301486	0.0732413	-0.0429084	0.13846
ACADM_+_76190695.23-P1P2	-0.066735	-0.396736	-0.993218	-0.066735	-0.129214	-0.944153	-0.066735	0.239522	0.261032	-0.00946168	-0.110945	-0.219078
ACADM_+_76190716.23-P1P2	0.0196819	-0.471221	-0.882747	0.0196819	-0.186251	-0.721463	0.0196819	-0.0950662	-0.116932	-0.066003	0.0293785	-0.122863
ACADM_+_76190816.23-P1P2	0.0492141	-0.2416	-0.330784	0.0492141	0.0256589	0.424588	0.0492141	-0.0109657	0.125231	-0.0389525	0.234416	0.327341
ACADM_-_76190463.23-P1P2	0.0131146	-0.214042	-0.384102	0.0131146	-0.00112798	0.0975382	0.0131146	0.00627961	0.0538511	-0.00261831	0.0737963	0.137071
ACADM_-_76190475.23-P1P2	-0.0216906	0.187327	0.320054	-0.0216906	0.117091	0.448245	-0.0216906	0.0362441	0.00998791	0.0339354	-0.431127	-0.680327
ACADM_-_76190620.23-P1P2	-0.0351373	-0.0965922	-0.292858	-0.0351373	-0.087237	-0.572206	-0.0351373	0.107206	0.104164	0.068065	0.0691048	0.328074
ACADM_-_76190633.23-P1P2	-0.0269468	0.253756	0.438116	-0.0269468	0.326417	1.38654	-0.0269468	-0.0400267	-0.147823	-0.0118792	0.0900402	0.140542
ACADM_-_76190671.23-P1P2	-0.020013	0.146743	0.243298	-0.020013	0.349917	1.53422	-0.020013	0.38771	0.672471	0.0802803	-0.45366	-0.590568
ACADSB_+_124768533.23-P1P2	0.0220316	0.140539	0.357595	0.0220316	0.280368	1.4493	0.0220316	0.0743493	0.206827	0.0150686	0.114061	0.260418
ACADSB_+_124768710.23-P1P2	-0.0469022	0.00482023	-0.123901	-0.0469022	0.364204	1.44893	-0.0469022	0.250734	0.338956	-0.066055	-0.394237	-0.895365
ACADSB_+_124768874.23-P1P2	0.0810819	-0.281851	-0.315817	0.0810819	-0.0435547	0.283935	0.0810819	-0.201388	-0.13959	0.0326925	-0.280235	-0.408723
ACADSB_+_124768891.23-P1P2	-0.0251496	0.549985	1.04071	-0.0251496	-0.0892431	-0.525263	-0.0251496	-0.228268	-0.494903	0.0514487	-0.315008	-0.419169
ACADSB_+_124768894.23-P1P2	0.0308293	-0.233835	-0.370578	0.0308293	-0.0930707	-0.227872	0.0308293	-0.0363315	0.0249792	-0.0315951	0.581846	0.981561
ACADSB_+_124768941.23-P1P2	0.0456739	-0.216775	-0.291416	0.0456739	0.273802	1.55202	0.0456739	0.13736	0.392616	-0.0533877	0.00571419	-0.130393
ACADSB_+_124768944.23-P1P2	0.0653463	-0.216897	-0.232332	0.0653463	0.172821	1.19583	0.0653463	0.00654474	0.204315	0.0609534	-0.127001	-0.0495526
ACADSB_+_124768952.23-P1P2	0.00536693	-0.118773	-0.215416	0.00536693	0.13626	0.689179	0.00536693	-0.0287854	-0.0340083	-0.0213035	0.272686	0.446943
ACADSB_-_124768497.23-P1P2	0.0345333	-0.120476	-0.130885	0.0345333	-0.13991	-0.423595	0.0345333	-0.296929	-0.452019	-0.0258708	-0.0496316	-0.153615
ACADSB_-_124768552.23-P1P2	-0.0296038	0.246798	0.416078	-0.0296038	-0.0809019	-0.511767	-0.0296038	-0.121119	-0.307192	0.0152773	0.112093	0.25742
ACADS_+_121163619.23-P1P2	-0.0625523	0.137167	0.0957007	-0.0625523	0.181079	0.514111	-0.0625523	0.125741	0.0601326	0.0209652	0.0250274	0.114736
ACADS_+_121163685.23-P1P2	0.041567	0.061462	0.2571	0.041567	0.238204	1.3643	0.041567	-0.131524	-0.122316	0.0284937	-0.00106325	0.0884211
ACADS_+_121163695.23-P1P2	-0.164515	0.15418	-0.177513	-0.164515	-0.192066	-1.78514	-0.164515	0.00425503	-0.459948	-0.0812722	0.137283	0.0307643
ACADS_+_121163865.23-P1P2	0.0146267	0.188035	0.431011	0.0146267	-0.00641392	0.0816086	0.0146267	-0.0411427	-0.0305445	0.0439457	0.262171	0.611986
ACADS_+_121164027.23-P1P2	0.0278057	-0.146219	-0.20307	0.0278057	0.265133	1.41136	0.0278057	-0.193071	-0.276995	-0.029512	0.339907	0.546329
ACADS_+_121164090.23-P1P2	-0.18685	0.124859	-0.303984	-0.18685	0.307821	0.400501	-0.18685	-0.0783818	-0.67871	-0.155761	0.00513883	-0.420466
ACADS_-_121163653.23-P1P2	-0.0291139	0.20457	0.332426	-0.0291139	0.129805	0.465247	-0.0291139	0.216255	0.325513	0.00111147	0.161542	0.307584
ACADS_-_121163657.23-P1P2	0.0302363	0.00329071	0.105659	0.0302363	0.212991	1.18395	0.0302363	0.215759	0.494992	-0.0193089	0.169475	0.264395
ACADS_-_121163671.23-P1P2	0.0102695	-0.0474213	-0.0567901	0.0102695	0.131283	0.693759	0.0102695	0.0314414	0.0927652	0.0146553	-0.198405	-0.310451
ACADS_-_121163758.23-P1P2	0.00161871	-0.0320416	-0.0518759	0.00161871	0.291032	1.38371	0.00161871	-0.064495	-0.11159	-0.00352403	0.178746	0.325863
ACADVL_+_7123231.23-P1P2	-0.0355326	-0.205437	-0.513473	-0.0355326	-0.272861	-1.43271	-0.0355326	-0.154036	-0.38581	0.00431242	-0.0149468	-0.00516176
ACADVL_+_7123718.23-P1P2	-0.0636067	-0.295392	-0.779483	-0.0636067	0.401368	1.52674	-0.0636067	0.289941	0.364359	-0.0518545	0.244893	0.310016
ACADVL_-_7123221.23-P1P2	0.0314867	-0.0538459	-0.00575213	0.0314867	-0.11345	-0.318399	0.0314867	-0.44077	-0.729924	-0.0327731	0.233588	0.343277
ACADVL_-_7123242.23-P1P2	0.0452091	-0.0121907	0.119607	0.0452091	-0.198131	-0.632706	0.0452091	0.0397564	0.208643	0.106399	-0.370108	-0.364492
ACADVL_-_7123283.23-P1P2	0.00604393	-0.0105659	0.00476335	0.00604393	0.0868063	0.464327	0.00604393	0.0965514	0.202467	0.0128796	0.0279937	0.0973164
ACADVL_-_7123300.23-P1P2	0.00685384	-0.453046	-0.884796	0.00685384	-0.00822478	0.0294842	0.00685384	0.0241724	0.0693563	-0.0336096	0.11203	0.119284
ACADVL_-_7123392.23-P1P2	-0.0393183	0.309589	0.51336	-0.0393183	0.229427	0.86844	-0.0393183	0.0677967	0.0184164	0.0392981	-0.0634156	0.0052408
ACADVL_-_7123639.23-P1P2	0.0565897	0.0466815	0.272611	0.0565897	-0.0996746	-0.113409	0.0565897	-0.327254	-0.445434	0.0471119	-0.173194	-0.172852
ACADVL_-_7123665.23-P1P2	-0.0566266	-0.174285	-0.51429	-0.0566266	0.24037	0.821615	-0.0566266	0.259898	0.328182	0.0306809	-0.0472878	0.0103173
ACADVL_-_7123677.23-P1P2	-0.0242887	-0.125677	-0.318772	-0.0242887	0.0958061	0.335205	-0.0242887	-0.18632	-0.413938	0.00889588	0.0710776	0.164622
ACAN_+_89346671.23-P1P2	0.0153885	0.154458	0.36562	0.0153885	0.108195	0.615821	0.0153885	-0.169007	-0.267618	-0.00539538	-0.25862	-0.476846
ACAN_+_89347050.23-P1P2	-0.0955539	-0.277067	-0.83889	-0.0955539	-0.00084231	-0.512805	-0.0955539	-0.271501	-0.777945	-0.160455	-0.155524	-0.726646
ACAN_+_89347054.23-P1P2	-0.0205769	0.254057	0.457934	-0.0205769	0.00605869	-0.0588722	-0.0205769	0.0730582	0.0820724	0.00281448	-0.319216	-0.564147
ACAN_+_89347058.23-P1P2	0.0701836	-0.251032	-0.286555	0.0701836	-0.161604	-0.323241	0.0701836	-0.277895	-0.314042	0.0314516	0.0078663	0.113052
ACAN_+_89347139.23-P1P2	-0.0552796	-0.0432374	-0.246046	-0.0552796	0.0322893	-0.13292	-0.0552796	-0.335722	-0.782481	0.0378756	-0.449683	-0.703034
ACAN_+_89347148.23-P1P2	-0.00849751	-0.185264	-0.391268	-0.00849751	0.0146994	0.0490719	-0.00849751	-0.228425	-0.447385	-0.00548302	-0.261435	-0.482225
ACAN_+_89347151.23-P1P2	0.0795869	-0.129943	-0.0140916	0.0795869	-0.23177	-0.594745	0.0795869	-0.325195	-0.375553	-0.0437283	-0.20719	-0.491298
ACAN_-_89346701.23-P1P2	-0.0187198	0.225079	0.405119	-0.0187198	-0.0378591	-0.251485	-0.0187198	0.308437	0.527848	0.0350951	0.0376105	0.17757
ACAN_-_89346738.23-P1P2	0.0103849	0.172091	0.386075	0.0103849	0.116205	0.624696	0.0103849	0.0729426	0.170754	-0.00836276	0.0400019	0.059238
ACAN_-_89347101.23-P1P2	-0.0117934	0.0366442	0.0461389	-0.0117934	0.278256	1.24914	-0.0117934	0.101257	0.160057	-0.0133601	0.223783	0.380207
ACAP1_+_7239854.23-P1P2	-0.0348175	0.247341	0.401448	-0.0348175	0.0273198	-0.0407222	-0.0348175	0.165709	0.214555	0.0257448	0.182393	0.415146
ACAP1_+_7239897.23-P1P2	0.0298367	0.360993	0.825552	0.0298367	0.545236	2.71792	0.0298367	-0.336744	-0.540006	-0.0532195	-0.0483057	-0.22841
ACAP1_+_7239925.23-P1P2	0.0193174	-0.0592854	-0.0534195	0.0193174	0.260284	1.34116	0.0193174	-0.25221	-0.412028	0.0291	0.0905155	0.257103
ACAP1_+_7239956.23-P1P2	-0.0362787	0.392433	0.689534	-0.0362787	0.281294	1.12537	-0.0362787	0.17831	0.233937	-0.0451894	1.00569	1.71595
ACAP1_+_7240302.23-P1P2	-0.110312	0.410822	0.503327	-0.110312	0.150179	0.102413	-0.110312	-0.209192	-0.703725	-0.0200034	-0.361394	-0.705469
ACAP1_+_7240320.23-P1P2	0.0393063	-0.00634936	0.11358	0.0393063	-0.165058	-0.513008	0.0393063	-0.299959	-0.443985	0.0614611	0.169583	0.492627
ACAP1_-_7239866.23-P1P2	0.0624879	0.224433	0.648731	0.0624879	0.406675	2.26103	0.0624879	-0.259426	-0.301579	0.106629	-0.184342	-0.0251473
ACAP1_-_7240198.23-P1P2	-0.0227082	0.182321	0.306894	-0.0227082	0.198263	0.81784	-0.0227082	0.328159	0.553301	0.0264087	0.0201004	0.121121
ACAP1_-_7240242.23-P1P2	0.00150398	0.163177	0.341323	0.00150398	0.114187	0.565374	0.00150398	0.241862	0.46134	-0.0433261	-0.0773674	-0.253465
ACAP1_-_7240264.23-P1P2	0.0152717	0.153174	0.362679	0.0152717	0.22897	1.1736	0.0152717	-0.546726	-0.974747	0.0438152	-0.435011	-0.659516
ACAP2_+_195163325.23-P1P2	0.0730414	-0.517786	-0.81569	0.0730414	-0.227713	-0.612827	0.0730414	0.131972	0.46111	-0.00310487	-0.387561	-0.705469
ACAP2_+_195163701.23-P1P2	0.0587296	0.0369844	0.259516	0.0587296	0.305153	1.77046	0.0587296	-0.381778	-0.541316	0.0413009	-0.0127214	0.103323
ACAP2_+_195163707.23-P1P2	-0.0387943	0.339679	0.575599	-0.0387943	0.221373	0.834149	-0.0387943	0.167603	0.206679	0.00445897	-0.064877	-0.095783
ACAP2_-_195163292.23-P1P2	0.0447125	-0.0536214	0.0345882	0.0447125	-0.130597	-0.323241	0.0447125	-0.0327053	0.0716262	0.0571695	0.0954476	0.345343
ACAP2_-_195163352.23-P1P2	-0.109567	0.0166139	-0.289117	-0.109567	0.0185559	-0.501987	-0.109567	0.430686	0.495761	-0.0717903	0.152135	0.0846124
ACAP2_-_195163362.23-P1P2	-0.120169	-0.218811	-0.795688	-0.120169	-0.0696106	-0.969323	-0.120169	-0.107367	-0.54149	-0.128635	0.334252	0.256171
ACAP2_-_195163382.23-P1P2	-0.0244878	-0.00970924	-0.0855908	-0.0244878	-0.0493982	-0.337305	-0.0244878	-0.118808	-0.288179	-0.0166776	-0.451516	-0.860394
ACAP2_-_195163395.23-P1P2	0.00381043	0.227339	0.477624	0.00381043	-0.134673	-0.572313	0.00381043	-0.123866	-0.216393	0.0709906	0.0116859	0.231645
ACAP2_-_195163655.23-P1P2	-0.0373206	0.31599	0.532288	-0.0373206	0.0837707	0.206204	-0.0373206	-0.248098	-0.566955	-0.0298526	0.025033	-0.0287251
ACAP2_-_195163749.23-P1P2	0.0200474	-0.453834	-0.846593	0.0200474	-0.22203	-0.884838	0.0200474	0.223311	0.479868	-0.00182799	0.0382664	0.074523
ACAP3_+_1242907.23-P1P2	0.0616407	0.11	0.415489	0.0616407	-0.0904936	-0.0425281	0.0616407	-0.0478609	0.0918712	0.0119162	0.0985987	0.223327
ACAP3_+_1243258.23-P1P2	-0.016547	0.0757283	0.110593	-0.016547	0.205437	0.88569	-0.016547	0.181148	0.295902	0.0325647	0.227324	0.51632
ACAP3_+_1243301.23-P1P2	0.0776349	0.157239	0.558956	0.0776349	-0.210457	-0.507181	0.0776349	-0.239901	-0.221554	-0.00980734	-0.236226	-0.448471
ACAP3_+_1243337.23-P1P2	-0.0611444	0.105642	0.0363949	-0.0611444	0.0803658	0.0563631	-0.0611444	-0.264238	-0.665558	-0.0277638	-0.433458	-0.858769
ACAP3_-_1242824.23-P1P2	0.0713548	-0.00216674	0.218667	0.0713548	-0.0425235	0.233952	0.0713548	-0.192527	-0.150938	0.0313118	0.110467	0.299724
ACAP3_-_1242913.23-P1P2	-0.000362066	0.291345	0.59407	-0.000362066	0.10059	0.492003	-0.000362066	-0.201791	-0.374188	0.033257	-0.181264	-0.226682
ACAP3_-_1243095.23-P1P2	0.0329485	0.0328997	0.173528	0.0329485	0.307033	1.63404	0.0329485	-0.137959	-0.159103	0.0163674	-0.220157	-0.345276
ACAP3_-_1243221.23-P1P2	0.00033301	0.145611	0.302379	0.00033301	-0.0537637	-0.217781	0.00033301	0.0417972	0.0836133	0.0141268	-0.431722	-0.737337
ACAP3_-_1243228.23-P1P2	0.0162718	0.2117	0.483679	0.0162718	-0.0620743	-0.166492	0.0162718	0.242448	0.504838	-0.0758377	0.337503	0.411157
ACAP3_-_1243235.23-P1P2	0.00335983	0.128515	0.277045	0.00335983	0.179472	0.877682	0.00335983	0.0869143	0.176728	0.00249277	-0.0413883	-0.0585083
ACAT1_+_107992288.23-P1P2	-0.049435	0.604684	1.07774	-0.049435	0.0413288	-0.0582255	-0.049435	-0.202808	-0.516989	-0.0193491	-0.276568	-0.548964
ACAT1_+_107992310.23-P1P2	-0.105405	0.382928	0.461892	-0.105405	0.403037	1.29919	-0.105405	0.345541	0.348386	0.0179168	0.153423	0.340226
ACAT1_+_107992321.23-P1P2	0.00229087	0.169745	0.356937	0.00229087	-0.143363	-0.621045	0.00229087	0.0140468	0.0373078	0.0118834	-0.00145584	0.0408103
ACAT1_+_107992690.23-P1P2	0.0108789	-0.389782	-0.745122	0.0108789	0.100948	0.556928	0.0108789	0.0369034	0.104736	-0.0301278	-0.18741	-0.416838
ACAT1_+_107992693.23-P1P2	0.0292396	0.315764	0.732573	0.0292396	-0.0226266	0.0888965	0.0292396	0.119177	0.311405	0.0510586	0.088605	0.315614
ACAT1_-_107992307.23-P1P2	0.075283	-0.229692	-0.228156	0.075283	0.0357193	0.61784	0.075283	-0.102405	0.0289779	0.070026	-0.111791	0.00379225
ACAT1_-_107992336.23-P1P2	0.00741803	0.0965691	0.224883	0.00741803	-0.10339	-0.407363	0.00741803	0.118789	0.248024	0.0211388	-0.0762735	-0.0694703
ACAT1_-_107992364.23-P1P2	-0.0232629	0.0865689	0.112192	-0.0232629	0.176172	0.712571	-0.0232629	0.239079	0.385021	0.0336355	-0.0385155	0.0346529
ACAT1_-_107992702.23-P1P2	-0.0467184	-0.500414	-1.14185	-0.0467184	-0.109174	-0.738824	-0.0467184	-0.0641466	-0.249725	-0.0253916	0.0390565	0.00943767
ACAT1_-_107992733.23-P1P2	0.0654324	-0.355408	-0.511298	0.0654324	0.0511057	0.633536	0.0654324	-0.017987	0.158659	0.0328945	-0.0341518	0.0405169
ACAT2_+_160183137.23-P1P2	-0.0142505	-0.0815588	-0.199559	-0.0142505	0.0490376	0.175461	-0.0142505	0.125607	0.198567	0.00508284	-0.0110405	0.00413543
ACAT2_+_160183421.23-P1P2	0.0195076	-0.302927	-0.544006	0.0195076	-0.285207	-1.17999	0.0195076	-0.0933291	-0.114182	-0.0145501	-0.409371	-0.777546
ACAT2_+_160183436.23-P1P2
ACAT2_+_160183505.23-P1P2	-0.0237464	0.0764802	0.0903957	-0.0237464	0.335097	1.44468	-0.0237464	-0.0903567	-0.232812	0.0321059	0.361132	0.758989
ACAT2_-_160183042.23-P1P2	0.0602658	0.00724846	0.204204	0.0602658	-0.188992	-0.505701	0.0602658	0.0835077	0.333742	0.0261821	-0.119315	-0.133708
ACAT2_-_160183054.23-P1P2	0.0282302	-0.125087	-0.159189	0.0282302	-0.182712	-0.656982	0.0282302	-0.0194517	0.0491025	-0.0218186	-0.092703	-0.220705
ACAT2_-_160183095.23-P1P2	0.0211819	-0.31609	-0.565492	0.0211819	-0.107395	-0.348405	0.0211819	0.268713	0.568082	0.0169364	-0.448698	-0.760355
ACAT2_-_160183174.23-P1P2	-0.0662175	0.0824606	-0.0256373	-0.0662175	0.359193	1.31704	-0.0662175	0.112049	0.0239889	-0.0203073	0.115734	0.163593
ACAT2_-_160183545.23-P1P2	-0.00924463	-0.0899083	-0.201293	-0.00924463	-0.20606	-0.975873	-0.00924463	0.125015	0.211832	0.0720202	-0.0786432	0.0698596
ACAT2_-_160183588.23-P1P2	-0.12687	0.582881	0.800244	-0.12687	0.0756457	-0.335412	-0.12687	-0.0541062	-0.461069	-0.0638947	-0.371998	-0.848719
ACBD3_+_226374329.23-P1P2	0.011802	-0.371778	-0.706043	0.011802	-0.0206371	-5.57908e-05	0.011802	-0.0242105	-0.00697126	-0.024064	0.0450643	0.0241395
ACBD3_+_226374366.23-P1P2	-0.0133443	-0.0267807	-0.0863975	-0.0133443	-0.131552	-0.654443	-0.0133443	-0.133365	-0.283422	0.0189062	-0.394082	-0.655217
ACBD3_-_226373901.23-P1P2	0.0404246	0.201271	0.535497	0.0404246	-0.398229	-1.58484	0.0404246	-0.0458747	0.0346721	-0.0104036	-0.100606	-0.202886
ACBD3_-_226373955.23-P1P2	0.0673845	-0.124973	-0.040873	0.0673845	-0.240026	-0.701601	0.0673845	-0.245531	-0.261519	-0.0293206	-0.35983	-0.728922
ACBD3_-_226373992.23-P1P2	-0.0567607	0.265446	0.371766	-0.0567607	-0.15429	-1.00395	-0.0567607	0.143443	0.109885	0.0142389	-0.31535	-0.524845
ACBD3_-_226373998.23-P1P2	-0.0599454	0.166371	0.162435	-0.0599454	0.448884	1.76705	-0.0599454	0.274668	0.346292	-0.157695	0.399444	0.292989
ACBD3_-_226374023.23-P1P2	-0.045838	0.350357	0.575882	-0.045838	0.0331733	-0.0756877	-0.045838	-0.423784	-0.920154	0.037056	0.350732	0.754004
ACBD3_-_226374064.23-P1P2	-0.0130045	-0.131238	-0.29595	-0.0130045	0.161494	0.702448	-0.0130045	0.0608668	0.0810018	0.0450682	0.288287	0.662772
ACBD3_-_226374403.23-P1P2	0.0226748	-0.00730285	0.0614986	0.0226748	-0.209667	-0.812883	0.0226748	-0.229916	-0.360671	-0.0136706	0.0567586	0.0748042
ACBD3_-_226374411.23-P1P2	-0.0300847	-0.299215	-0.68609	-0.0300847	-0.167198	-0.913485	-0.0300847	-0.145569	-0.354325	-0.14429	0.651811	0.790959
ACBD4_+_43210021.23-P2	-0.0913381	0.231757	0.199571	-0.0913381	0.0727913	-0.148611	-0.0913381	0.161835	0.0450219	-0.0770316	0.195856	0.149529
ACBD4_+_43210042.23-P2	0.0832458	0.0742682	0.408616	0.0832458	0.199212	1.41861	0.0832458	-0.55125	-0.788043	0.0897814	0.00202014	0.267073
ACBD4_+_43210060.23-P2
ACBD4_+_43210408.23-P2	0.00536693	-0.268106	-0.516458	0.00536693	0.0768637	0.414544	0.00536693	-0.216241	-0.384777	0.0198293	-0.223861	-0.342255
ACBD4_+_43210421.23-P2	0.0263286	-0.429808	-0.779217	0.0263286	-0.261639	-1.03263	0.0263286	0.0201444	0.117735	0.077278	-0.21965	-0.172385
ACBD4_+_43213044.23-P1	-0.0324453	0.230216	0.374078	-0.0324453	0.0626798	0.136126	-0.0324453	0.411114	0.68057	-0.0261356	0.141534	0.19418
ACBD4_+_43213087.23-P1	-0.0452379	0.0511717	-0.0254403	-0.0452379	0.10487	0.259197	-0.0452379	-0.0517759	-0.222325	-0.073936	0.242055	0.2425
ACBD4_+_43213412.23-P1											0.398888	0.702481
ACBD4_-_43210055.23-P2	0.0678904	0.115375	0.445172	0.0678904	-0.219154	-0.602246	0.0678904	0.00858568	0.215439	0.0380602	-0.138984	-0.136034
ACBD4_-_43210342.23-P2	0.0538291	-0.391193	-0.618433	0.0538291	-0.0802675	-0.0392139	0.0538291	-0.439635	-0.663649	0.00918225	0.0953102	0.209612
ACBD4_-_43210377.23-P2	-0.0146844	-0.175481	-0.390207	-0.0146844	-0.30881	-1.48158	-0.0146844	-0.10895	-0.241585	-0.00854641	-0.220111	-0.41553
ACBD4_-_43210416.23-P2	0.03702	0.28933	0.702749	0.03702	-0.134673	-0.385385	0.03702	0.108168	0.313144	0.0444025	-0.122687	-0.0884137
ACBD4_-_43210458.23-P2	0.0818694	0.155845	0.568916	0.0818694	-0.0977064	0.0379831	0.0818694	0.166887	0.551791	0.0691863	-0.147095	-0.0629459
ACBD4_-_43213050.23-P1	-0.0162475	-0.279615	-0.604845	-0.0162475	-0.124704	-0.639119	-0.0162475	-0.210756	-0.436573	0.0274075	0.412449	0.839289
ACBD4_-_43213072.23-P1	-0.0102477	-0.00095834	-0.0250028	-0.0102477	0.317403	1.43885	-0.0102477	-0.0473419	-0.113564	0.00165196	0.110986	0.216934
ACBD4_-_43213075.23-P1	0.00991468	-0.280516	-0.52776	0.00991468	-0.104812	-0.399884	0.00991468	-0.129166	-0.208784	-0.0297484	0.0257683	-0.0270901
ACBD4_-_43213105.23-P1	-0.0288496	0.208901	0.341954	-0.0288496	-0.100893	-0.599958	-0.0288496	0.096491	0.102167	0.00818647	0.387986	0.740421
ACBD4_-_43213242.23-P1	-0.105539	-0.15055	-0.613957	-0.105539	-0.0196836	-0.656125	-0.105539	0.0274578	-0.247199	-0.0661547	-0.188929	-0.52132
ACBD4_-_43213460.23-P1	0.0217586	0.0652514	0.204999	0.0217586	-0.0691773	-0.168451	0.0217586	-0.279575	-0.456225	-0.0536705	0.503713	0.776782
ACBD4_-_43213499.23-P1	-0.109496	0.265529	0.212889	-0.109496	0.196588	0.321592	-0.109496	-0.323332	-0.914962	0.0198918	-0.521041	-0.883911
ACBD5_+_27529127.23-P1P2	-0.122441	0.308381	0.260235	-0.122441	-0.0830507	-1.04425	-0.122441	0.246113	0.113421	-0.0644754	-0.0794432	-0.316959
ACBD5_+_27529290.23-P1P2	-0.0379229	0.245786	0.388948	-0.0379229	-0.137068	-0.818291	-0.0379229	0.257686	0.377746	0.0556438	0.206845	0.544139
ACBD5_+_27529332.23-P1P2	-0.0205271	0.186519	0.321934	-0.0205271	0.464349	2.06043	-0.0205271	-0.141246	-0.318792	-0.028445	-0.423396	-0.842346
ACBD5_+_27529682.23-P1P2	-0.0258494	0.527965	0.994208	-0.0258494	0.0298617	0.0215095	-0.0258494	0.121214	0.157043	0.0221196	-0.247371	-0.378654
ACBD5_+_27529701.23-P1P2	0.0186938	0.101548	0.268927	0.0186938	0.349835	1.75171	0.0186938	0.196218	0.425284	-0.0284936	0.0185558	-0.0366977
ACBD5_+_27529710.23-P1P2	0.00346249	0.295471	0.613922	0.00346249	0.18466	0.902246	0.00346249	-0.208142	-0.375091	0.0307042	-0.0138467	0.0713544
ACBD5_+_27529713.23-P1P2	0.214559	-0.418639		0.214559	-0.237829		0.214559	-0.342818			0.17619	0.342
ACBD5_-_27529363.23-P1P2
ACBD5_-_27529679.23-P1P2	0.0608667	-0.495911	-0.808311	0.0608667	0.230654	1.43802	0.0608667	0.040431	0.254862	0.0084738	-0.0751778	-0.103229
ACBD5_-_27529780.23-P1P2	-0.00391055	0.285996	0.572585	-0.00391055	0.100881	0.473376	-0.00391055	-0.153342	-0.293719	0.00202013	-0.191261	-0.333097
ACBD6_+_180471319.23-P1P2	-0.0239143	-0.107379	-0.280755	-0.0239143	0.058834	0.166363	-0.0239143	-0.155689	-0.355545	0.00590924	0.207568	0.405045
ACBD6_+_180471324.23-P1P2	0.076204	-0.439777	-0.648892	0.076204	0.344534	2.05091	0.076204	-0.580972	-0.863878	0.0208069	0.428433	0.849796
ACBD6_+_180471354.23-P1P2	0.0265226	-0.00804427	0.0716086	0.0265226	-0.125673	-0.402856	0.0265226	0.0388617	0.153316	-0.0583408	0.165633	0.147194
ACBD6_+_180471478.23-P1P2	-0.0390946	0.712189	1.32564	-0.0390946	0.490374	2.07626	-0.0390946	-0.202808	-0.4873	0.0974799	-0.351812	-0.356315
ACBD6_+_180471539.23-P1P2	-0.0176995	0.228697	0.415489	-0.0176995	0.334826	1.47747	-0.0176995	-0.186644	-0.395623	-0.0244522	0.121892	0.16312
ACBD6_+_180471617.23-P1P2	-0.00655658	0.186374	0.363775	-0.00655658	0.0596048	0.267629	-0.00655658	0.0734328	0.123029	0.000900814	-0.0906993	-0.152909
ACBD6_-_180471311.23-P1P2	0.0102207	-0.234065	-0.433195	0.0102207	-0.0876403	-0.318763	0.0102207	-0.259921	-0.452577	-0.0668571	0.808054	1.29444
ACBD6_-_180471491.23-P1P2	0.0711947	-0.164815	-0.1097	0.0711947	-0.0856252	0.0337591	0.0711947	-0.105329	0.0117678	-0.00238897	0.219526	0.403419
ACBD6_-_180471532.23-P1P2	0.0516861	0.272373	0.712797	0.0516861	-0.29224	-1.03139	0.0516861	0.0586922	0.262673	0.0229521	0.00995645	0.0928674
ACBD6_-_180471707.23-P1P2	0.0116847	0.0862157	0.216879	0.0116847	-0.196072	-0.811885	0.0116847	-0.304877	-0.532494	0.0060137	0.00384165	0.0338973
ACBD7_+_15130458.23-P1P2	0.0368874	0.128814	0.378762	0.0368874	0.0594789	0.51158	0.0368874	-0.485333	-0.797804	-0.0434184	0.32465	0.479251
ACBD7_+_15130520.23-P1P2	-0.0510266	0.16718	0.190964	-0.0510266	0.121701	0.304437	-0.0510266	0.246748	0.319655	0.0289468	-0.107653	-0.104639
ACBD7_+_15130765.23-P1P2	0.0253124	0.0308332	0.146332	0.0253124	0.398613	2.0145	0.0253124	0.0523657	0.17511	0.00137009	-0.454533	-0.814942
ACBD7_+_15130776.23-P1P2	0.0223232	-0.596431	-1.12719	0.0223232	-0.0397118	-0.0290316	0.0223232	0.085743	0.228984	0.00866948	0.00735877	0.0478078
ACBD7_-_15130379.23-P1P2	0.0125311	0.110587	0.268562	0.0125311	-0.297122	-1.27435	0.0125311	-0.0961746	-0.139538	-0.0229362	0.0454039	0.0279428
ACBD7_-_15130397.23-P1P2	0.127927	0.211935	0.820895	0.127927	-0.12675		0.127927	-0.327774		0.102357	-0.230143
ACBD7_-_15130438.23-P1P2	-0.109239	0.181748	0.0447676	-0.109239	0.318403	0.886281	-0.109239	0.181865	0.0311048	-0.0439356	-0.201892	-0.482225
ACBD7_-_15130555.23-P1P2	-0.028654	0.130749	0.184997	-0.028654	0.029395	0.00356569	-0.028654	0.239916	0.371109	0.0577969	-0.55955	-0.847106
ACBD7_-_15130579.23-P1P2	-0.0400356	0.18386	0.257739	-0.0400356	0.172441	0.600911	-0.0400356	0.0688757	0.018376	-0.0506682	-0.152195	-0.410623
ACBD7_-_15130633.23-P1P2	0.00499501	-0.280919	-0.543409	0.00499501	-0.0760925	-0.294783	0.00499501	-0.0816691	-0.134033	0.0255304	0.0762962	0.2211
ACCSL_+_44069556.23-ENST00000378832.1	0.0409944	0.0263199	0.18453	0.0409944	-0.0131116	0.199056	0.0409944	-0.0575543	0.0144531	0.0475888	-0.188389	-0.199209
ACCSL_+_44069616.23-ENST00000378832.1	-0.00836387	0.0296614	0.0424054	-0.00836387	-0.112816	-0.539779	-0.00836387	0.00882424	-0.00305671	0.0147063	0.0317103	0.10925
ACCSL_+_44069971.23-ENST00000378832.1	0.00653639	0.0138599	0.055489	0.00653639	0.30728	1.48652	0.00653639	0.0534097	0.123154	0.00169005	-0.0866284	-0.143258
ACCSL_+_44069981.23-ENST00000378832.1	-0.103432	0.356292	0.414149	-0.103432	0.0533436	-0.306603	-0.103432	0.342338	0.348058	-0.0208292	-0.288326	-0.57458
ACCSL_+_44069992.23-ENST00000378832.1	0.00407873	0.104119	0.230031	0.00407873	-0.196964	-0.85882	0.00407873	0.154825	0.305866	-0.0138892	-0.0976396	-0.207319
ACCSL_-_44069582.23-ENST00000378832.1	0.0129908	-0.362993	-0.684749	0.0129908	0.419388	2.04121	0.0129908	0.0640315	0.161561	0.00851226	0.192302	0.384561
ACCSL_-_44069740.23-ENST00000378832.1	0.0266291	0.111792	0.313509	0.0266291	0.361811	1.85175	0.0266291	0.00604317	0.0922117	0.0216504	-0.0773128	-0.0699209
ACCSL_-_44069759.23-ENST00000378832.1	-0.0663783	0.343638	0.500389	-0.0663783	0.294016	1.01477	-0.0663783	-0.0345093	-0.250715	-0.0231414	-0.033646	-0.116764
ACCSL_-_44069772.23-ENST00000378832.1	-0.0611414	-0.00810392	-0.192899	-0.0611414	0.225836	0.729002	-0.0611414	0.0738014	-0.0330061	0.00818647	-0.0932357	-0.136964
ACCSL_-_44069930.23-ENST00000378832.1
ACCS_+_44087946.23-P1P2	0.00573418	-0.211633	-0.401506	0.00573418	0.0229568	0.167358	0.00573418	0.054307	0.12253	-0.0279176	0.236771	0.362788
ACCS_+_44088025.23-P1P2	0.0280249	-0.359098	-0.631554	0.0280249	-0.174658	-0.620897	0.0280249	0.240654	0.535225	0.0211285	-0.332895	-0.537383
ACCS_+_44088028.23-P1P2	0.0170126	0.0745463	0.209423	0.0170126	-0.0756535	-0.22511	0.0170126	0.3225	0.656759	-0.0440163	0.117838	0.100493
ACCS_+_44088070.23-P1P2	-0.0150254	-0.0296453	-0.0972426	-0.0150254	0.191763	0.831027	-0.0150254	0.318135	0.556602	-0.0600517	-0.0743877	-0.295253
ACCS_+_44088091.23-P1P2	-0.0445078	0.442827	0.766305	-0.0445078	-0.212609	-1.20464	-0.0445078	0.180719	0.214818	0.0426387	0.61743	1.25602
ACCS_+_44088215.23-P1P2	0.00979195	0.30856	0.659397	0.00979195	-0.185955	-0.775759	0.00979195	0.281574	0.559445	-0.00877289	-0.283099	-0.531012
ACCS_+_44088290.23-P1P2								0.674245	1.09541	0.116359	-0.135817
ACCS_-_44088081.23-P1P2	-0.0356298	0.323931	0.553396	-0.0356298	0.486404	2.0774	-0.0356298	0.0123078	-0.0748244	-0.044201	0.245459	0.332657
ACCS_-_44088090.23-P1P2	-0.0152112	0.0585879	0.0800681	-0.0152112	0.160125	0.683696	-0.0152112	0.0993996	0.146769	0.0120087	-0.351377	-0.596828
ACCS_-_44088106.23-P1P2	0.00423904	0.102343	0.226935	0.00423904	-0.0276066	-0.0748506	0.00423904	-0.0244101	-0.0290595	-0.062735	0.0858004	-0.0107664
ACD_+_67693727.23-P1P2	-0.00655397	0.194559	0.380284	-0.00655397	-0.235724	-1.09789	-0.00655397	0.198861	0.35774	0.0127105	-0.0324857	-0.0134296
ACD_+_67693748.23-P1P2	0.0191897	-0.0985969	-0.133053	0.0191897	-0.150262	-0.557829	0.0191897	-0.20914	-0.331802	0.0548316	0.340681	0.785863
ACD_+_67694105.23-P1P2	-0.0532471	0.225011	0.30085	-0.0532471	0.136614	0.360895	-0.0532471	-0.10628	-0.347311	-0.109134	0.0417437	-0.222088
ACD_+_67694124.23-P1P2	-0.0768255	-0.106128	-0.437809	-0.0768255	0.148439	0.282854	-0.0768255	-0.0480833	-0.306111	-0.0894338	0.216669	0.152462
ACD_-_67693904.23-P1P2	0.0132564	0.204363	0.459794	0.0132564	0.570568	2.74172	0.0132564	-0.00774569	0.0280137	0.0556364	-0.295411	-0.371616
ACD_-_67693954.23-P1P2	0.00914077	0.25576	0.550994	0.00914077	-0.209667	-0.889062	0.00914077	0.114952	0.245791	0.0222532	0.181124	0.402974
ACD_-_67693957.23-P1P2	0.0244075	0.719304	1.5315	0.0244075	-0.137226	-0.468183	0.0244075	0.103391	0.267992	-0.0765539	0.0556839	-0.10469
ACD_-_67694092.23-P1P2	0.0393063	0.0404725	0.207969	0.0393063	-0.193622	-0.64508	0.0393063	-0.0824783	-0.0370317	0.024183	0.32356	0.668117
ACD_-_67694143.23-P1P2	-0.0713862	-0.263035	-0.737715	-0.0713862	0.141817	0.282851	-0.0713862	0.146383	0.0733943	-0.134342	0.079713	-0.22403
ACD_-_67694152.23-P1P2	-0.0212322	0.320943	0.590795	-0.0212322	0.152447	0.614303	-0.0212322	-0.0433328	-0.137601	0.0366187	-0.0214024	0.0742767
ACE2_+_15618824.23-P1P2	-0.0127906	0.227763	0.42841	-0.0127906	0.636315	2.89911	-0.0127906	0.190481	0.324151	0.029906	0.118355	0.310136
ACE2_+_15618847.23-P1P2	-0.0790093	0.284389	0.342855	-0.0790093	-0.0219891	-0.517458	-0.0790093	-0.0229732	-0.265395	0.0320596	0.156229	0.38527
ACE2_+_15619016.23-P1P2	-0.159729		-0.550438	-0.159729		-0.537578	-0.159729		-0.328617	-0.00940522	0.0950659	0.15669
ACE2_+_15619047.23-P1P2	-0.142786	-0.0572909	-0.538289	-0.142786	-0.016397	-0.850582	-0.142786	0.337526	0.226059	-0.0500048	-0.441657	-0.936509
ACE2_+_15619087.23-P1P2	-0.0500465	0.0293855	-0.083862	-0.0500465	0.0887119	0.157421	-0.0500465	-0.27467	-0.653213	0.0389985	-0.378043	-0.569247
ACE2_-_15618591.23-P1P2	-0.0259826	-0.365644	-0.807633	-0.0259826	0.0686158	0.19995	-0.0259826	0.275979	0.446259	-0.0982316	0.238262	0.166992
ACE2_-_15618594.23-P1P2	-0.0147095	0.49538	0.962117	-0.0147095	0.174391	0.752483	-0.0147095	-0.218104	-0.445907	0.0211332	0.385685	0.772777
ACE2_-_15618975.23-P1P2	-0.249285		-0.761541	-0.249285		-0.691257	-0.249285		-0.512643	-0.190114		-0.622746
ACE2_-_15618978.23-P1P2	0.021022	-0.136527	-0.203992	0.021022	-0.197303	-0.765019	0.021022	-0.216241	-0.339828	0.033206	-0.0714625	-0.0266301
ACE2_-_15619013.23-P1P2	-0.0123583	0.0428536	0.0569531	-0.0123583	0.320998	1.44359	-0.0123583	-0.0865543	-0.192999	0.0323193	0.0824796	0.251541
ACER1_+_6333110.23-P1P2	0.00905918	-0.125358	-0.217554	0.00905918	0.432054	2.07764	0.00905918	-0.0789836	-0.117339	0.0134976	-0.0594925	-0.0604474
ACER1_+_6333137.23-P1P2	-0.120811	0.18386	0.0141278	-0.120811	-0.109853	-1.15901	-0.120811	0.150164	-0.0614391	-0.0368471	0.10487	0.0970895
ACER1_+_6333164.23-P1P2	0.083994	-0.309447	-0.362664	0.083994	-0.0975876	0.0504918	0.083994	-0.0578978	0.137271	0.0070229	-0.22494	-0.380378
ACER1_+_6333525.23-P1P2	-0.117346	-0.123589	-0.595216	-0.117346	0.385074	1.14892	-0.117346	0.136909	-0.0762926	-0.0644232	0.170314	0.138557
ACER1_-_6333127.23-P1P2	0.0176739	-0.042604	-0.0247477	0.0176739	0.0812664	0.504173	0.0176739	0.30367	0.623422	-0.0686719	0.427323	0.595151
ACER1_-_6333176.23-P1P2	-0.120468	0.249173	0.146826	-0.120468	-0.0805792	-1.02172	-0.120468	0.0328525	-0.279969	-0.0319355	-0.358253	-0.733429
ACER1_-_6333413.23-P1P2	0.0249265	-0.194451	-0.308984	0.0249265	0.0230628	0.275876	0.0249265	-0.568388	-0.98756	0.00264403	-0.217778	-0.379682
ACER1_-_6333545.23-P1P2	0.0495802	-0.256254	-0.359222	0.0495802	-0.0158097	0.234908	0.0495802	-0.34726	-0.502996	0.0237858	-0.0441772	-0.00347773
ACER1_-_6333558.23-P1P2	-0.0469693	-0.348213	-0.835788	-0.0469693	0.586376	2.47582	-0.0469693	-0.228958	-0.558842	-0.0120531	-0.0968522	-0.200699
ACER1_-_6333623.23-P1P2	-0.0807772	-0.00634936	-0.248582	-0.0807772	0.0068611	-0.394013	-0.0807772	-0.0159437	-0.257317	-0.00525936	0.0406133	0.0691144
ACER2_+_19409007.23-P1P2	0.00468999	-0.301295	-0.585405	0.00468999	0.4871	2.30757	0.00468999	0.0574268	0.125369	-0.00584163	0.244565	0.439325
ACER2_+_19409248.23-P1P2	0.0231655	0.118265	0.316112	0.0231655	-0.155381	-0.559118	0.0231655	0.13122	0.3165	-0.0149549	-0.20295	-0.402334
ACER2_+_19409371.23-P1P2	0.00230042	-0.398618	-0.788806	0.00230042	0.057193	0.306331	0.00230042	0.0670976	0.136605	-0.0515577	0.115235	0.074457
ACER2_+_19409376.23-P1P2	0.0351609	0.00752931	0.129056	0.0351609	-0.216067	-0.772197	0.0351609	-0.149693	-0.174707	0.0326743	0.0778621	0.244124
ACER2_+_19409383.23-P1P2	0.0422524	0.396652	0.934881	0.0422524	0.360034	1.93147	0.0422524	-0.0302417	0.0691728	-0.0131677	0.0392345	0.0442733
ACER2_+_19409433.23-P1P2	0.052982	0.0388615	0.245966	0.052982	-0.297795	-1.04978	0.052982	-0.408417	-0.607666	-0.0425519	-0.366011	-0.777546
ACER2_+_19409493.23-P1P2	0.0127184	-0.306224	-0.571128	0.0127184	-0.0307063	-0.0414549	0.0127184	-0.321681	-0.560971	0.0101885	-0.188929	-0.305784
ACER2_-_19409274.23-P1P2	-0.079677	0.0605121	-0.110477	-0.079677	0.0468644	-0.202854	-0.079677	-0.0156812	-0.253667	-0.0585213	-0.31688	-0.733056
ACER2_-_19409294.23-P1P2	-0.00655523	0.176613	0.344102	-0.00655523	0.0686789	0.309593	-0.00655523	0.165456	0.295228	-0.0378016	0.128438	0.137365
ACER2_-_19409474.23-P1P2	-0.0191754	0.127327	0.206685	-0.0191754	0.407643	1.80584	-0.0191754	0.0260711	-0.0018264	0.0296509	-0.226531	-0.319395
ACER3_+_76571969.23-P1P2	0.0786344	0.351778	0.954145	0.0786344	-0.103837	-0.00856964	0.0786344	0.0218704	0.271146	0.0174926	0.141192	0.316729
ACER3_+_76572444.23-P1P2	-0.00150748	-0.261015	-0.522895	-0.00150748	-0.10957	-0.486174	-0.00150748	-0.161667	-0.302396	-0.00616795	0.524454	0.94871
ACER3_-_76571770.23-P1P2	-0.00338731	-0.194897	-0.395276	-0.00338731	0.0728859	0.346876	-0.00338731	0.595422	1.10888	-0.0468608		-0.3217
ACER3_-_76571978.23-P1P2	0.0685706	0.221252	0.660664	0.0685706	-0.0525744	0.171808	0.0685706	-0.227564	-0.224495	-0.0738799	-0.270066	-0.691062
ACER3_-_76572000.23-P1P2	0.000201629	0.0927755	0.195471	0.000201629	-0.146832	-0.648845	0.000201629	-0.114034	-0.208358	-0.0110816	-0.36363	-0.684359
ACER3_-_76572003.23-P1P2	0.0581141	-0.0626421	0.0568215	0.0581141	0.112469	0.876071	0.0581141	-0.177126	-0.160136	-0.00857215	-0.0221846	-0.0547344
ACER3_-_76572006.23-P1P2	0.0260251	-0.0646314	-0.0439666	0.0260251	-0.254696	-1.00223	0.0260251	-0.146797	-0.19552	0.0260291	-0.120033	-0.135449
ACER3_-_76572045.23-P1P2	0.0249265	0.0757064	0.235629	0.0249265	0.205859	1.12108	0.0249265	0.0680935	0.203432	0.0507214	0.190505	0.500451
ACER3_-_76572313.23-P1P2	0.00998148	0.0867847	0.212889	0.00998148	0.279977	1.37966	0.00998148	-0.151727	-0.250808	-0.0933354	0.130379	-0.015881
ACER3_-_76572404.23-P1P2	0.0173206	-0.198298	-0.33968	0.0173206	-0.0318387	-0.0207869	0.0173206	-0.123115	-0.176198	0.0199316	0.111899	0.270205
ACE_+_61554448.23-P1	0.0276049	-0.233817	-0.380267	0.0276049	-0.166343	-0.584815	0.0276049	0.284851	0.616723	-0.036646	-0.0684921	-0.218424
ACE_+_61554534.23-P1	0.0129434	-0.137897	-0.231117	0.0129434	-0.0824727	-0.279544	0.0129434	-0.0255027	-0.00611193	-0.0330245	0.0940231	0.0881056
ACE_+_61554651.23-P1	0.0255117	-0.0745932	-0.0655971	0.0255117	0.165004	0.935474	0.0255117	0.019121	0.113475	0.0116563	-0.300477	-0.505021
ACE_+_61554816.23-P1	-0.036896	0.234804	0.369905	-0.036896	0.225984	0.866156	-0.036896	0.0339113	-0.0380352	-0.0398137	0.15636	0.182594
ACE_+_61554829.23-P1	0.0449503	-0.00659452	0.130108	0.0449503	-0.0575734	0.0157419	0.0449503	0.0981938	0.317249	0.0108225	0.318788	0.621698
ACE_+_61562226.23-P2	0.0209847	0.115927	0.304822	0.0209847	-0.107682	-0.350842	0.0209847	-0.380577	-0.647443	0.0310258	-0.112608	-0.107804
ACE_+_61562272.23-P2	0.00410006	0.25123	0.526659	0.00410006	0.323834	1.54935	0.00410006	-0.0406911	-0.0599237	-0.00748655	-0.237022	-0.443371
ACE_+_61562293.23-P2	0.0627743	0.129141	0.457494	0.0627743	-0.217768	-0.624632	0.0627743	-0.502884	-0.756318	-0.00835014	-0.304921	-0.569605
ACE_+_61562404.23-P2	0.0403187	0.33503	0.804826	0.0403187	-0.267264	-0.97989	0.0403187	-0.31699	-0.472946	-0.0921845	0.314944	0.323875
ACE_+_61562589.23-P2	-0.00989571	0.03496	0.0484671	-0.00989571	0.431603	1.96886	-0.00989571	-0.152743	-0.309781	0.0582049	0.184501	0.510632
ACE_-_61554428.23-P1	0.000668757	-0.253734	-0.501654	0.000668757	-0.108256	-0.467851	0.000668757	0.1354	0.259728	0.0383532	-0.0193104	0.0829876
ACE_-_61554458.23-P1	0.00642952	0.0195332	0.0666036	0.00642952	0.012859	0.124582	0.00642952	0.0191536	0.0587466	0.0340159	0.0930476	0.275599
ACE_-_61554461.23-P1	0.0095275	0.117459	0.273356	0.0095275	0.251277	1.24441	0.0095275	0.137793	0.289641	0.0185732	0.0798604	0.207957
ACE_-_61554901.23-P1	0.0396335	-0.193113	-0.261932	0.0396335	0.0438276	0.454669	0.0396335	-0.0661911	-0.00561561	0.0165333	0.157601	0.343937
ACE_-_61554915.23-P1	-0.00427154	-0.312902	-0.63583	-0.00427154	-0.0828545	-0.378207	-0.00427154	-0.224383	-0.427687	-0.0395805	0.0275451	-0.0516091
ACE_-_61562238.23-P2	-0.00723264	-0.0872525	-0.189871	-0.00723264	-0.074438	-0.355959	-0.00723264	-0.0355033	-0.082755	-0.0123619	-0.155445	-0.308401
ACE_-_61562443.23-P2	0.0972626	-0.191907	-0.0856974	0.0972626	-0.0784395	0.213713	0.0972626	0.000865487	0.285327	0.12301	-0.58084	-0.701811
ACE_-_61562505.23-P2	0.0895618	-0.405575	-0.539658	0.0895618	-0.0309573	0.389914	0.0895618	0.13837	0.520517	-0.030339	-0.297239	-0.617679
ACE_-_61562601.23-P2	-0.0483268	-0.136527	-0.413142	-0.0483268	-0.14533	-0.915053	-0.0483268	-0.103352	-0.327705	-0.0183729	-0.396844	-0.765499
ACE_-_61562661.23-P2	4.746e-06	0.00726266	0.0224905	4.746e-06	-0.0503101	-0.20366	4.746e-06	-0.195927	-0.362163	0.0162883	0.050797	0.148516
ACHE_+_100493137.23-P1	-0.00377593	0.110294	0.21879	-0.00377593	-0.10938	-0.498066	-0.00377593	-0.0666643	-0.131139	-0.0362211	-0.185058	-0.429753
ACHE_+_100493329.23-P1	0.0384106	0.0431938	0.210753	0.0384106	-0.167883	-0.531114	0.0384106	0.0446294	0.198242	0.0209603	0.18537	0.407065
ACHE_+_100493456.23-P1	0.0270033	0.279258	0.652236	0.0270033	-0.109891	-0.327181	0.0270033	0.0261648	0.130938	0.0531578	0.165149	0.4611
ACHE_+_100493473.23-P1	-0.00578901	0.00141593	-0.00676944	-0.00578901	-0.145189	-0.674971	-0.00578901	-0.0478386	-0.101692	-0.0239901	-0.0789046	-0.201677
ACHE_+_100494559.23-P2	-0.0398902	-0.0889162	-0.291718	-0.0398902	0.175869	0.617583	-0.0398902	-0.0307009	-0.167535	0.0467796	-0.402457	-0.591792
ACHE_+_100494570.23-P2	0.0183557	-0.155272	-0.24982	0.0183557	0.158023	0.862915	0.0183557	0.144707	0.327926	-0.0307391	0.534676	0.897977
ACHE_+_100494596.23-P2	0.0217097	0.16468	0.40529	0.0217097	-0.173373	-0.650501	0.0217097	-0.0457905	-0.0189048	-0.0265302	0.0934433	0.105384
ACHE_-_100493040.23-P1	0.0416858	0.215183	0.567346	0.0416858	-0.162343	-0.487061	0.0416858	-0.0162747	0.093681	0.049583	-0.0259511	0.102584
ACHE_-_100493104.23-P1	0.0167375	0.0842716	0.228198	0.0167375	0.105316	0.610104	0.0167375	-0.107021	-0.147757	-0.107285	0.478234	0.578961
ACHE_-_100493122.23-P1	-0.0178217	-0.0556967	-0.158193	-0.0178217	0.365258	1.61749	-0.0178217	0.1356	0.207012	0.0191421	-0.0500716	-0.0273351
ACHE_-_100493407.23-P1	0.109544	-0.517786	-0.705601	0.109544	-0.318505	-0.827163	0.109544	-0.167064	0.00635806	-0.0028127	-0.190745	-0.345801
ACHE_-_100493427.23-P1	0.0142291	-0.113756	-0.178573	0.0142291	0.0460611	0.322002	0.0142291	0.266333	0.543666	0.0297146	-0.0910585	-0.0722153
ACHE_-_100493486.23-P1	0.041544	0.118328	0.371668	0.041544	0.157807	0.992437	0.041544	0.0332947	0.186029	0.0548461	-0.259782	-0.308887
ACHE_-_100494233.23-P2	-0.020013	-0.125677	-0.305876	-0.020013	-0.13189	-0.693539	-0.020013	0.0810958	0.0987317	0.00509445	-0.047839	-0.0629244
ACHE_-_100494236.23-P2	-0.0237326	0.320692	0.582749	-0.0237326	-0.0332015	-0.258164	-0.0237326	0.283288	0.466396	0.0136561	0.00784499	0.0627727
ACHE_-_100494326.23-P2	0.00353764	-0.0127129	-0.00712361	0.00353764	0.0359634	0.215134	0.00353764	0.0867532	0.176937	-0.0395737	-0.0377276	-0.170598
ACHE_-_100494356.23-P2	-0.236377		-0.799403	-0.236377		-0.623253	-0.236377	0.525741	0.309531	-0.0252294	0.0532592	0.0357906
ACHE_-_100494415.23-P2	0.0596638	0.237057	0.665663	0.0596638	-0.134673	-0.25793	0.0596638	0.110887	0.383246	0.0734706	-0.0695166	0.0905946
ACHE_-_100494526.23-P2	0.02787	-0.167815	-0.246413	0.02787	-0.160603	-0.556782	0.02787	-0.0219028	0.0434817	-0.0150535	0.0584488	0.0739815
ACHE_-_100494578.23-P2	-0.00882965	0.156343	0.296381	-0.00882965	0.0763518	0.332268	-0.00882965	0.111317	0.187391	0.0256529	0.125258	0.310715
ACIN1_+_23540370.23-P2	-0.0570565	0.239413	0.318394	-0.0570565	0.371625	1.42609	-0.0570565	-0.103095	-0.352287	-0.0595695	-0.0518213	-0.252747
ACIN1_+_23540783.23-P2	-0.0163856	-0.282683	-0.611448	-0.0163856	-0.224298	-1.1004	-0.0163856	0.0989663	0.142586	-0.0538008	0.107424	0.0538831
ACIN1_+_23563821.23-P1	-0.178063	-0.191998	-0.91624	-0.178063	0.111533	-0.457629	-0.178063	0.124971	-0.272963	-0.00985427	0.055763	0.0837635
ACIN1_+_23563962.23-P1	-0.0354724	0.227978	0.360438	-0.0354724	0.324569	1.33	-0.0354724	0.0206382	-0.0587846	-0.0524252	0.297371	0.404085
ACIN1_+_23564097.23-P1	0.023435	-0.342081	-0.611093	0.023435	0.271529	1.41633	0.023435	-0.33053	-0.546759	-0.0313004	-0.204744	-0.451752
ACIN1_+_23564314.23-P1	-0.017966	0.15946	0.275109	-0.017966	0.204273	0.872322	-0.017966	-0.212774	-0.445284	0.0232638	-0.20846	-0.304479
ACIN1_+_23564345.23-P1	0.0210382	0.0715958	0.215616	0.0210382	-0.160892	-0.596573	0.0210382	-0.409446	-0.70131	-0.019257	-0.220469	-0.446422
ACIN1_-_23540292.23-P2	-0.0658374	0.238532	0.290136	-0.0658374	-0.0698206	-0.664478	-0.0658374	-0.121064	-0.411124	-0.0771526	-0.191309	-0.556709
ACIN1_-_23540315.23-P2	-0.0297994	-0.0957437	-0.275048	-0.0297994	0.068894	0.179753	-0.0297994	-0.298545	-0.639755	0.00398503	-0.222009	-0.383612
ACIN1_-_23540722.23-P2	-0.0168855	-0.461969	-0.97438	-0.0168855	-0.0514173	-0.30385	-0.0168855	-0.0932863	-0.218595	0.0103606	-0.386197	-0.664966
ACIN1_-_23540725.23-P2	-0.0730799	-0.0154807	-0.243775	-0.0730799	0.180021	0.449966	-0.0730799	0.32828	0.4089	-0.0243915	-0.0835973	-0.211366
ACIN1_-_23540730.23-P2	-0.090327	0.469223	0.68133	-0.090327	0.499867	1.83178	-0.090327	-0.17681	-0.585751	-0.0129875	-0.11068	-0.22855
ACIN1_-_23540744.23-P2	-0.0645875	0.177207	0.170279	-0.0645875	-0.164117	-1.09345	-0.0645875	0.0954943	-0.00230862	-0.0177454	-0.322294	-0.627805
ACIN1_-_23540756.23-P2	0.0245686	-0.204803	-0.330933	0.0245686	-0.199943	-0.757265	0.0245686	0.0762298	0.21763	0.0131014	-0.0573395	-0.0576406
ACIN1_-_23540802.23-P2	0.0319897	-0.250933	-0.401547	0.0319897	0.014751	0.277201	0.0319897	0.138612	0.355667	-0.00359887	-0.0809189	-0.147781
ACIN1_-_23563847.23-P1	0.0340636	0.0689196	0.249504	0.0340636	0.202877	1.15873	0.0340636	0.194414	0.46604	-0.0333754	-0.0289877	-0.137164
ACIN1_-_23563913.23-P1	0.0344583	0.265912	0.647814	0.0344583	-0.0228042	0.11745	0.0344583	-0.478961	-0.792855	0.0785005	-0.115111	0.0216661
ACIN1_-_23564062.23-P1	-0.00365193	0.243919	0.488542	-0.00365193	0.298824	1.39007	-0.00365193	0.216159	0.39844	0.0387148	-0.00071855	0.117906
ACIN1_-_23564262.23-P1	0.0249895	0.306458	0.700995	0.0249895	-0.0830507	-0.214413	0.0249895	-0.155084	-0.213999	0.0134235	-0.118901	-0.168973
ACIN1_-_23564284.23-P1	-0.0428841	0.143946	0.168683	-0.0428841	0.0600687	0.0652963	-0.0428841	0.208505	0.271473	0.00177042	0.0303823	0.0703075
ACKR2_+_42850956.23-P1P2	-0.0497591	0.111955	0.0834589	-0.0497591	0.0993266	0.208118	-0.0497591	0.0708782	-0.00579493	-0.0469374	-0.106869	-0.317449
ACKR2_-_42850976.23-P1P2	0.0840057	-0.167966	-0.0774165	0.0840057	-0.223169	-0.530099	0.0840057	-0.37865	-0.46289	-0.00435819	0.620732	1.12936
ACKR2_-_42850987.23-P1P2	0.0347116	-0.0897536	-0.068413	0.0347116	0.224808	1.26378	0.0347116	-0.128795	-0.136892	0.0694109	-0.59531	-0.879517
ACKR2_-_42850992.23-P1P2	0.0111298	-0.165488	-0.292208	0.0111298	-0.106637	-0.401484	0.0111298	-0.27843	-0.4846	-0.0456582	0.172251	0.195067
ACKR2_-_42851020.23-P1P2	0.0215827	0.227326	0.531197	0.0215827	0.249629	1.30464	0.0215827	0.0381578	0.137816	0.00598525	0.140631	0.283217
ACKR2_-_42851024.23-P1P2	-0.144937	0.596394	0.772998	-0.144937	0.182514	0.0570297	-0.144937	-0.0357148	-0.478528	-0.0450778	-0.221566	-0.52132
ACKR2_-_42851391.23-P1P2	-0.0396211	0.289863	0.47268	-0.0396211	-0.0199456	-0.286304	-0.0396211	0.321557	0.492386	0.0758512	0.126537	0.454769
ACKR2_-_42851412.23-P1P2	-0.066338	-0.0507204	-0.294482	-0.066338	-0.118624	-0.892952	-0.066338	-0.114163	-0.399649	0.0154708	-0.131764	-0.186645
ACKR2_-_42851475.23-P1P2	0.052609	0.0211648	0.209166	0.052609	-0.311038	-1.11311	0.052609	-0.213132	-0.243317	-0.0205553	0.327431	0.54887
ACKR2_-_42851479.23-P1P2	0.00926963	0.0375518	0.111493	0.00926963	0.0281373	0.211212	0.00926963	0.163573	0.337141	-0.00341822	0.410673	0.749022
ACKR3_+_237476442.23-P2	-0.00110101	-0.054056	-0.104457	-0.00110101	-0.0795795	-0.345219	-0.00110101	-0.153878	-0.286654	0.0411319	-0.103922	-0.0634348
ACKR3_+_237476473.23-P2	0.0364387	0.146312	0.412683	0.0364387	0.485105	2.47705	0.0364387	-0.0214135	0.0689999	0.0400907	0.0839559	0.276173
ACKR3_+_237476736.23-P2	-0.0242756	0.462748	0.867483	-0.0242756	0.470825	2.06928	-0.0242756	-0.0340733	-0.129013	0.0507682	-0.054159	0.0545009
ACKR3_+_237476822.23-P2	0.0129325	-0.166948	-0.289715	0.0129325	0.0220666	0.203759	0.0129325	-0.27515	-0.473286	0.119945	0.165836	0.650908
ACKR3_+_237476887.23-P2	0.0526932	-0.0845373	-0.00366654	0.0526932	-0.14217	-0.331829	0.0526932	-0.202061	-0.222361	0.0499966	0.068245	0.275495
ACKR3_+_237478500.23-P1	-0.0201872	-0.117471	-0.289859	-0.0201872	0.00117466	-0.0792612	-0.0201872	0.026129	-0.00462298	-0.0529749	0.165853	0.162745
ACKR3_+_237478916.23-P1	0.0129672	-0.0945323	-0.143626	0.0129672	0.326472	1.61145	0.0129672	-0.0016997	0.0384967	-0.0315951	-0.27257	-0.576248
ACKR3_+_237478950.23-P1	-0.00103439	0.0637233	0.133176	-0.00103439	-0.0526384	-0.220274	-0.00103439	-0.191396	-0.356666	-0.00835303	-0.0753453	-0.151041
ACKR3_-_237476457.23-P2
ACKR3_-_237476493.23-P2	-0.0248083	0.0169675	-0.0327794	-0.0248083	-0.182097	-0.952678	-0.0248083	-0.117746	-0.287113	-0.0626413	-0.290594	-0.69676
ACKR3_-_237476505.23-P2	0.0104495	-0.0421222	-0.0455644	0.0104495	0.409082	1.97925	0.0104495	0.0813634	0.186697	0.0456591	0.0998144	0.320808
ACKR3_-_237476881.23-P2	-0.0676629	-0.210901	-0.621388	-0.0676629	-0.159583	-1.08979	-0.0676629	0.194663	0.174426	-0.118726	0.143408	-0.0638082
ACKR3_-_237476900.23-P2	0.0195109	0.102871	0.274058	0.0195109	0.380136	1.89641	0.0195109	0.175923	0.389655	0.0409841	-0.129378	-0.110265
ACKR3_-_237478572.23-P1	-0.145772	0.433736	0.442575	-0.145772		-0.0392139	-0.145772		-0.515932	0.0649855	-0.226503	-0.219586
ACKR3_-_237478578.23-P1	-0.0496974	0.240017	0.341806	-0.0496974	0.236383	0.842182	-0.0496974	0.0694017	-0.00838071	-0.109849	0.339869	0.31945
ACKR3_-_237478586.23-P1	0.00407873	-0.440456	-0.867785	0.00407873	-0.159962	-0.687732	0.00407873	0.123901	0.248002	3.45519e-05	-0.112904	-0.195838
ACKR3_-_237478610.23-P1	0.0652458	-0.411194	-0.62432	0.0652458	-0.242427	-0.724742	0.0652458	-0.295183	-0.36057	-0.0389614	-0.31391	-0.672417
ACKR3_-_237478615.23-P1	-0.00680149	-0.00596626	-0.0247049	-0.00680149	0.397825	1.8301	-0.00680149	0.0375271	0.0551384	0.0233297	-0.0340273	0.0137402
ACKR3_-_237478884.23-P1	0.000569372	0.108611	0.228504	0.000569372	0.102689	0.506949	0.000569372	0.00764112	0.0203787	-0.0509485	-0.113869	-0.341537
ACKR3_-_237478929.23-P1	-0.0350021	-0.0589536	-0.216574	-0.0350021	-0.101407	-0.636965	-0.0350021	0.073043	0.0406262	-0.0357217	0.3459	0.539724
ACKR4_+_132316216.23-P1P2	0.0431712	-0.231908	-0.329471	0.0431712	0.275778	1.54707	0.0431712	-0.563112	-0.925302	0.00692612	-0.409929	-0.717933
ACKR4_+_132316328.23-P1P2	-0.0480256	0.109921	0.0845859	-0.0480256	-0.149562	-0.932926	-0.0480256	0.101716	0.0568859	-0.0139027	0.198192	0.332016
ACKR4_+_132316377.23-P1P2	-0.0338262	0.299823	0.510235	-0.0338262	-0.114735	-0.691971	-0.0338262	0.145751	0.180055	0.0016445	-0.176811	-0.307812
ACKR4_+_132316545.23-P1P2	-0.00557236	0.0174748	0.0262572	-0.00557236	-0.129769	-0.602451	-0.00557236	-0.0782745	-0.158022	-0.0339014	0.149922	0.187547
ACKR4_-_132316111.23-P1P2	0.0147702	-0.0899306	-0.128911	0.0147702	-0.212192	-0.869052	0.0147702	-0.0364943	-0.0214344	-0.0126533	0.238099	0.408304
ACKR4_-_132316167.23-P1P2		0.28906	0.411261					0.683584	1.11288	0.114628	-0.256112
ACKR4_-_132316171.23-P1P2
ACKR4_-_132316248.23-P1P2	0.000363293	0.0751385	0.160404	0.000363293	-0.145544	-0.641982	0.000363293	0.0584001	0.114768	0.0295599	0.107813	0.289939
ACKR4_-_132316406.23-P1P2	-0.0721583	0.293281	0.381441	-0.0721583	0.283253	0.932471	-0.0721583	-0.44532	-1.03602	0.0686675	-0.258976	-0.268396
ACKR4_-_132316525.23-P1P2	-0.0071039	0.219574	0.429054	-0.0071039	-0.183208	-0.858161	-0.0071039	0.15845	0.280543	0.0141584	-0.00784043	0.0355925
ACLY_+_40074710.23-P1P2	0.0138268	0.109369	0.270015	0.0138268	0.27417	1.37446	0.0138268	0.14344	0.312551	0.0324226	-0.0318024	0.0434683
ACLY_+_40074807.23-P1P2	-0.137088	-0.073354	-0.553486	-0.137088	0.0431311	-0.543266	-0.137088	0.0461954	-0.302722	-0.14252	0.174861	-0.0736403
ACLY_+_40075121.23-P1P2	-0.0722257	0.138016	0.0682378	-0.0722257	0.593791	2.36795	-0.0722257	0.0516511	-0.10628	0.0603666	-0.0277504	0.129749
ACLY_-_40074750.23-P1P2	0.00350413	-0.489842	-0.969077	0.00350413	0.0644654	0.346732	0.00350413	-0.061942	-0.1014	-0.0726528	0.168463	0.111948
ACLY_-_40074817.23-P1P2	0.0730054	0.209913	0.65118	0.0730054	-0.200277	-0.486174	0.0730054	-0.448314	-0.62483	-0.0204999	0.270389	0.445024
ACLY_-_40075090.23-P1P2	-0.0483172	-0.292682	-0.727908	-0.0483172	0.101077	0.224327	-0.0483172	0.195248	0.231067	-0.144119	-0.329246	-0.997264
ACLY_-_40075168.23-P1P2	0.0792281	-0.125289	-0.00579197	0.0792281	0.317674	1.94374	0.0792281	-0.528061	-0.756189	0.0714157	0.212189	0.598412
ACLY_-_40075192.23-P1P2	0.0116972	-0.16323	-0.285945	0.0116972	-0.0672523	-0.216183	0.0116972	0.135037	0.290714	-0.00266255	-0.0546846	-0.0973055
ACLY_-_40075221.23-P1P2	-0.127149	-0.283787	-0.947727	-0.127149	0.356781	0.962918	-0.127149	0.29527	0.191885	-0.0269738	-0.247647	-0.517759
ACLY_-_40075227.23-P1P2	-0.156607	-0.00335988	-0.471252	-0.156607	0.444058	1.20066	-0.156607	0.314939	0.14411	-0.0562984	-0.182612	-0.481976
ACMSD_+_135596183.23-P1P2	-0.0256908	0.196019	0.325512	-0.0256908	0.00893594	-0.0743533	-0.0256908	0.267362	0.430973	-0.0112994	0.073846	0.112653
ACMSD_+_135596266.23-P1P2	-0.0855633	0.0428213	-0.163892	-0.0855633	-0.0471144	-0.670522	-0.0855633	0.301588	0.323111	-0.00468511	0.231604	0.418958
ACMSD_-_135596118.23-P1P2	-0.037938	-0.0838018	-0.27552	-0.037938	-0.189262	-1.05971	-0.037938	0.0633461	0.0140516	-0.0327826	0.0683638	0.0420055
ACMSD_-_135596123.23-P1P2	-0.0273773	0.212513	0.353675	-0.0273773	-0.0894543	-0.538779	-0.0273773	0.290476	0.469382	-0.0406846	0.420288	0.661341
ACMSD_-_135596149.23-P1P2	0.0451435	-0.24476	-0.34943	0.0451435	0.123896	0.855903	0.0451435	0.0378383	0.204866	0.0326097	0.159384	0.392575
ACMSD_-_135596200.23-P1P2	-0.0603203	0.409755	0.651946	-0.0603203	-0.033293	-0.464529	-0.0603203	-0.101021	-0.357778	0.0147063	0.357389	0.703043
ACMSD_-_135596315.23-P1P2	-0.0653684	0.320631	0.457054	-0.0653684	-0.0505663	-0.572811	-0.0653684	-0.0113076	-0.2044	-0.021475	0.0298397	0.00369073
ACMSD_-_135596354.23-P1P2	0.0648346	-0.478647	-0.761541	0.0648346	0.00482674	0.416188	0.0648346	-0.147709	-0.0857961	0.045303	0.163657	0.436203
ACMSD_-_135596438.23-P1P2	0.022075	0.145774	0.36828	0.022075	0.027191	0.278914	0.022075	-0.433221	-0.74282	0.0173265	0.0667201	0.180479
ACMSD_-_135596683.23-P1P2	0.0145933	0.0249162	0.102076	0.0145933	0.338129	1.67451	0.0145933	-0.369462	-0.644995	0.0362896	0.0595791	0.220997
ACN9_+_96747038.23-P1P2	0.0650039	-0.194897		0.0650039	-0.0557687		0.0650039	-0.0761413
ACN9_+_96747061.23-P1P2	-0.0890789	-0.0948264	-0.451981	-0.0890789	-0.144037	-1.13846	-0.0890789	-0.224598	-0.671589	-0.00426101	0.331485	0.602263
ACN9_+_96747104.23-P1P2	-0.010826	0.275803	0.531181	-0.010826	-0.130646	-0.636076	-0.010826	0.216216	0.377949	-0.0495723	0.312597	0.439902
ACN9_+_96747221.23-P1P2	0.0664259	0.204626	0.620679	0.0664259	-0.270121	-0.846146	0.0664259	-0.202348	-0.183468	-0.0288725	0.165703	0.230519
ACN9_+_96747240.23-P1P2	0.0596697	-0.181096	-0.17728	0.0596697	0.0320882	0.513167	0.0596697	0.101171	0.365083	-0.0811827	0.274552	0.281291
ACN9_+_96747363.23-P1P2	0.0311483	0.0051589	0.112176	0.0311483	-0.251708	-0.959579	0.0311483	-0.289508	-0.447852	0.0369841	-0.507726	-0.811378
ACN9_-_96747019.23-P1P2	0.0358444	0.0746159	0.266358	0.0358444	-0.144861	-0.43911	0.0358444	-0.265848	-0.390095	0.0627047	-0.348509	-0.448471
ACN9_-_96747046.23-P1P2	0.00789889	0.0728501	0.178517	0.00789889	-0.245061	-1.05971	0.00789889	-0.21345	-0.372285	0.0241983	-0.0325495	0.0188868
ACN9_-_96747065.23-P1P2	0.0510095	-0.0749543	0.0105743	0.0510095	0.192665	1.20689	0.0510095	0.0418499	0.229215	0.0257676	0.0073258	0.0960198
ACN9_-_96747455.23-P1P2	-0.0947769	-0.281712	-0.845912	-0.0947769	0.268788	0.738277	-0.0947769	-0.0494933	-0.360291	-0.0856033	0.117379	-0.017754
ACO1_+_32384680.23-P1P2	0.0216714	-0.320449	-0.572803	0.0216714	-0.312905	-1.29588	0.0216714	-0.128813	-0.174367	0.0727662	-0.154693	-0.0666914
ACO1_+_32384714.23-P1P2	-0.00212475	0.20059	0.405801	-0.00212475	0.233051	1.09455	-0.00212475	-0.150692	-0.283631	0.0580398	-0.412378	-0.578091
ACO1_+_32385057.23-P1P2	0.0344442	0.129144	0.372059	0.0344442	-0.406682	-1.65759	0.0344442	0.0402285	0.178618	-0.0256913	-0.192044	-0.412762
ACO1_-_32384671.23-P1P2	-0.0315158	-0.00650338	-0.100324	-0.0315158	-0.0430066	-0.34731	-0.0315158	-0.288989	-0.626802	-0.0495876	0.0848293	0.0245815
ACO1_-_32384696.23-P1P2	0.0122546	0.190309	0.428441	0.0122546	-0.230976	-0.970067	0.0122546	-0.0224132	-0.00230862	-0.085903	0.340039	0.387363
ACO1_-_32384733.23-P1P2	-0.0601378	-0.0592883	-0.293055	-0.0601378	0.165365	0.455045	-0.0601378	0.197966	0.202213	0.0139517	-0.19197	-0.300705
ACO1_-_32384889.23-P1P2	-0.0353945	-0.00537292	-0.109743	-0.0353945	0.275277	1.10253	-0.0353945	-0.132545	-0.345199	-0.018362	0.225398	0.369031
ACO1_-_32385047.23-P1P2	-0.0233697	-0.11199	-0.288408	-0.0233697	-0.0305211	-0.243728	-0.0233697	0.0961982	0.117354	-0.031807	-0.126089	-0.309774
ACO1_-_32385064.23-P1P2	0.0304665	-0.24336	-0.390873	0.0304665	-0.187823	-0.668029	0.0304665	0.0967577	0.272976	-0.0198289	0.225453	0.364988
ACO1_-_32385115.23-P1P2	-0.0438488	-0.119539	-0.365389	-0.0438488	-0.233961	-1.29966	-0.0438488	-0.215069	-0.523893	-7.83523e-05	0.23449	0.437226
ACO2_+_41865203.23-P1P2	-0.0587158	0.00273139	-0.16374	-0.0587158	0.0725936	0.0340964	-0.0587158	0.0480568	-0.0742153	0.000489927	-0.0403807	-0.0623259
ACO2_+_41865228.23-P1P2	-0.0274229	-0.171795	-0.421194	-0.0274229	-0.0172252	-0.205066	-0.0274229	-0.0864116	-0.235986	0.0163637	0.373994	0.737996
ACO2_+_41865231.23-P1P2	0.107436	-0.0346716	0.261959	0.107436	0.00266432	0.645982	0.107436	0.185292	0.659638	0.0395948	-0.103424	-0.0668657
ACO2_+_41865345.23-P1P2	0.0217804	-0.141402	-0.211531	0.0217804	-0.212932	-0.833017	0.0217804	-0.201995	-0.310994	-0.030339	-0.339992	-0.695628
ACO2_+_41865484.23-P1P2	-0.0186683	0.0553996	0.0632142	-0.0186683	-0.0495302	-0.305159	-0.0186683	0.242688	0.404966	0.00209015	0.228238	0.431949
ACO2_+_41865560.23-P1P2	0.00325498	-0.0622832	-0.107906	0.00325498	0.183112	0.893925	0.00325498	-0.0123774	-0.00936925	0.00754481	0.00688105	0.0437615
ACO2_-_41865209.23-P1P2	-0.0135947	-0.290875	-0.619544	-0.0135947	0.408541	1.84141	-0.0135947	0.0511736	0.061169	0.0911008	0.000255945	0.267581
ACO2_-_41865357.23-P1P2	-0.0260608	0.0174641	-0.0355558	-0.0260608	-0.156261	-0.840268	-0.0260608	-0.352406	-0.729807	-0.0244158	-0.0220189	-0.0991629
ACO2_-_41865534.23-P1P2	-0.0226257	0.308029	0.560558	-0.0226257	0.295966	1.27006	-0.0226257	0.084397	0.0974073	0.0433961	-0.364484	-0.532111
ACO2_-_41865573.23-P1P2	-0.0207962	0.0660147	0.0781958	-0.0207962	-0.0369709	-0.259065	-0.0207962	0.127356	0.183046	-0.0713379	0.310586	0.374785
ACOT11_+_55007947.23-P2	0.0284155	0.24992	0.597351	0.0284155	0.223881	1.22405	0.0284155	0.0734224	0.223422	-0.0114705	-0.400688	-0.753022
ACOT11_+_55007958.23-P2	0.0832485	-0.160287	-0.0642188	0.0832485	0.343948	2.08785	0.0832485	-0.0395888	0.169391	0.0590805	0.385641	0.879832
ACOT11_+_55007963.23-P2	-0.112324	-0.181964	-0.697748	-0.112324	0.134108	0.0167796	-0.112324	0.259804	0.168088	-0.0273574	-0.339992	-0.68721
ACOT11_+_55008024.23-P2	-0.0641324	-0.227519	-0.644241	-0.0641324	-0.0823134	-0.712645	-0.0641324	-0.271764	-0.688219	-0.0473509	-0.233208	-0.548964
ACOT11_+_55008184.23-P2	-0.120442	-0.0574764	-0.471276	-0.120442	0.546829	1.87941	-0.120442	-0.061864	-0.457131	0.00695597	-0.0944496	-0.142651
ACOT11_+_55008406.23-P2	0.0280394	0.0113123	0.115204	0.0280394	0.235716	1.27666	0.0280394	0.147195	0.360387	-0.00608268	0.32882	0.59226
ACOT11_+_55013888.23-P1	0.00624553	-0.400591	-0.780887	0.00624553	-0.0515518	-0.174274	0.00624553	-0.31796	-0.572593	-0.00296405	-0.113831	-0.205996
ACOT11_+_55013964.23-P1	0.0297908	-0.0221045	0.0531211	0.0297908	-0.0209188	0.0998959	0.0297908	-0.178541	-0.244106	0.011034	0.0937009	0.211906
ACOT11_+_55013970.23-P1	-0.0755227	-0.131025	-0.484069	-0.0755227	0.531191	2.05994	-0.0755227	0.0110872	-0.191649	-0.0406803	-0.0661603	-0.225562
ACOT11_+_55014110.23-P1	-0.363709		-0.726539	-0.363709		-1.04573	-0.363709	0.557979	0.00425583	-0.100736	0.284344	0.243941
ACOT11_-_55008004.23-P2	0.0755531	0.140065	0.518057	0.0755531	-0.00465795	0.432665	0.0755531	-0.373764	-0.478017	0.0817208	0.107962	0.437473
ACOT11_-_55008353.23-P2	-0.0612775	0.276809	0.381051	-0.0612775	-0.0596794	-0.591922	-0.0612775	0.405799	0.58784	-0.0680683	0.188744	0.161869
ACOT11_-_55008376.23-P2	0.0157596	0.0387516	0.133485	0.0157596	0.0573171	0.382663	0.0157596	-0.10171	-0.140627	0.019374	0.183009	0.398282
ACOT11_-_55008399.23-P2	-0.14636	-0.134939	-0.705601	-0.14636	0.22874	0.262755	-0.14636	0.350436	0.239954	0.0549025	0.0874215	0.324309
ACOT11_-_55013905.23-P1	-0.119	0.321682	0.297427	-0.119	-0.0681324	-0.955907	-0.119	0.137537	-0.079867	0.00632403	-0.0320092	-0.0305914
ACOT11_-_55013950.23-P1	0.0287525	-0.356114	-0.623345	0.0287525	0.0524556	0.433317	0.0287525	-0.000427259	0.0862008	-0.00731248	0.0818967	0.138588
ACOT11_-_55014024.23-P1	0.0687719	-0.0903064	0.0331955	0.0687719	-0.174827	-0.392326	0.0687719	0.345045	0.847557	0.0166784	-0.336476	-0.556477
ACOT11_-_55014173.23-P1	0.0548874	0.0825355	0.339756	0.0548874	-0.211145	-0.638402	0.0548874	-0.1113	-0.0462273	0.0865007	-0.089634	0.0907028
ACOT11_-_55014234.23-P1	-0.00190324	0.0651456	0.133423	-0.00190324	-0.0638809	-0.277147	-0.00190324	-0.216888	-0.406863	-0.0184861	-0.11168	-0.245895
ACOT11_-_55014292.23-P1	-0.0746079	0.146565	0.0782875	-0.0746079	0.00938449	-0.347619	-0.0746079	-0.0212294	-0.249494	0.0186918	0.136282	0.311162
ACOT12_+_80689507.23-P1P2	0.0285787	-0.0934762	-0.094414	0.0285787	-0.205104	-0.758556	0.0285787	-0.22346	-0.33164	-0.0432273	-0.031337	-0.169261
ACOT12_+_80689555.23-P1P2	-0.0216217	-0.202646	-0.465891	-0.0216217	-0.0692599	-0.413008	-0.0216217	-0.155855	-0.349272	-0.131654	-0.164437	-0.661585
ACOT12_+_80689628.23-P1P2	-0.0157058	0.258947	0.482483	-0.0157058	-0.128434	-0.653319	-0.0157058	-0.0244946	-0.0864836	-0.0335238	-0.581993	-1.14585
ACOT12_+_80689672.23-P1P2	0.0093919	0.172106	0.383112	0.0093919	-0.314894	-1.3742	0.0093919	-0.201646	-0.34591	-0.00810349	-0.0605629	-0.123384
ACOT12_+_80689920.23-P1P2	-0.0626673	-0.035217	-0.252158	-0.0626673	0.217838	0.683429	-0.0626673	-0.339961	-0.811624	0.0455338	0.0599199	0.247717
ACOT12_+_80689929.23-P1P2	0.0444861	-0.343487	-0.550438	0.0444861	0.442312	2.32448	0.0444861	-0.390705	-0.598917	-0.0506682	-0.181108	-0.463338
ACOT12_+_80689961.23-P1P2	0.0024881	0.266029	0.551632	0.0024881	0.375679	1.77999	0.0024881	-0.0231806	-0.0317862	-0.00227175	0.459153	0.840649
ACOT12_-_80689574.23-P1P2	-0.0698233	-0.184395	-0.574471	-0.0698233	-0.0348597	-0.525263	-0.0698233	-0.0136391	-0.221554	-0.0147375	-0.0549622	-0.131902
ACOT12_-_80689897.23-P1P2	0.0384477	0.0490404	0.222652	0.0384477	0.445898	2.30707	0.0384477	-0.27467	-0.399128	0.074159	-0.28353	-0.29766
ACOT12_-_80689916.23-P1P2	-0.0253731	-0.0885192	-0.247135	-0.0253731	-0.122631	-0.680898	-0.0253731	-0.231074	-0.500795	0.0347431	-0.200749	-0.258012
ACOT13_+_24667341.23-P1P2	-0.0266543	-0.082128	-0.238115	-0.0266543	0.330374	1.40648	-0.0266543	0.249855	0.395446	0.0216803	0.310518	0.637274
ACOT13_+_24667625.23-P1P2	0.0696716	0.0808703	0.380987	0.0696716	-0.129514	-0.177746	0.0696716	-0.0440274	0.122103	0.0391287	0.0734986	0.254391
ACOT13_-_24667290.23-P1P2	0.022075	-0.169814	-0.26792	0.022075	-0.047156	-0.0648488	0.022075	-0.000602771	0.0666999	-0.0291272	-0.0371483	-0.140049
ACOT13_-_24667329.23-P1P2	0.0364293	-0.161812	-0.208495	0.0364293	0.233819	1.31511	0.0364293	-0.0352639	0.0430557	0.0387655	0.00613213	0.13054
ACOT13_-_24667371.23-P1P2	0.0859655	-0.0604195	0.145299	0.0859655	0.000744051	0.516251	0.0859655	-0.359626	-0.421665	0.0517887	0.442977	0.963783
ACOT13_-_24667374.23-P1P2	0.0526751	0.323104	0.81805	0.0526751	0.0794598		0.0526751	0.368006	0.844305		0.668066	1.13876
ACOT13_-_24667386.23-P1P2	-0.0174401	-0.354035	-0.758468	-0.0174401	0.323255	1.42542	-0.0174401	-0.401524	-0.796966	0.0604898	-0.379702	-0.511597
ACOT13_-_24667473.23-P1P2	-0.0198416	-0.0407646	-0.134183	-0.0198416	0.0746324	0.262335	-0.0198416	0.0255157	-0.00477858	0.0180945	0.0512506	0.154443
ACOT13_-_24667530.23-P1P2	-0.0251384	0.105933	0.145572	-0.0251384	-0.201117	-1.04248	-0.0251384	0.169382	0.249217	-0.00220657	0.0335895	0.0649271
ACOT13_-_24667815.23-P1P2	-0.00552589	0.240014	0.475018	-0.00552589	-0.000762771	-0.00569521	-0.00552589	0.081959	0.141942	0.0810568	-0.373384	-0.442012
ACOT1_+_74003818.23-P1P2	-0.0177352	0.129828	0.216069	-0.0177352	0.0650276	0.229781	-0.0177352	0.120346	0.178718	-0.0302682	0.186791	0.265026
ACOT1_+_74003838.23-P1P2	-0.0286378	0.176915	0.278111	-0.0286378	-0.100489	-0.596896	-0.0286378	0.129261	0.164096	-0.0251224	0.332244	0.54475
ACOT1_+_74003843.23-P1P2	0.0365512	0.406326	0.93719	0.0365512	-0.0501666	0.0027129	0.0365512	0.0410027	0.186117	0.0129197	-0.134633	-0.19908
ACOT1_+_74004100.23-P1P2	-0.00407879	-0.157882	-0.322742	-0.00407879	0.273168	1.26904	-0.00407879	-0.0161475	-0.0374808	-0.0102916	-0.0956204	-0.19348
ACOT1_-_74004062.23-P1P2	-0.016235	-0.0399247	-0.121613	-0.016235	-0.0408167	-0.251174	-0.016235	0.221403	0.372124	0.00791432	0.205965	0.407783
ACOT1_-_74004076.23-P1P2	0.0454254	-0.0669549	0.00985901	0.0454254	-0.140416	-0.364627	0.0454254	0.00966081	0.152949	-0.00802176	0.193253	0.339614
ACOT1_-_74004103.23-P1P2	0.0247831	0.516013	1.12282	0.0247831	-0.276908	-1.11192	0.0247831	-0.0332409	0.0134023	-0.0185289	0.209634	0.339817
ACOT1_-_74004113.23-P1P2	0.0378613	0.289582	0.705795	0.0378613	-0.121006	-0.317458	0.0378613	-0.0652989	-0.00903466	0.00321598	-0.422265	-0.750899
ACOT1_-_74004496.23-P1P2	-0.0373524	-0.0305968	-0.166497	-0.0373524	-0.118705	-0.730173	-0.0373524	-0.279832	-0.626426	-0.0411979	-0.311904	-0.675074
ACOT1_-_74004524.23-P1P2	0.101715	0.349115	1.01839	0.101715	-0.099379	0.141957	0.101715	0.297207	0.852629	0.0390996	-0.295538	-0.418536
ACOT2_+_74035740.23-P1P2	-0.0339488	-0.238065	-0.574471	-0.0339488	-0.0653962	-0.464529	-0.0339488	0.21642	0.311939	-0.0546633	0.141884	0.114276
ACOT2_+_74035970.23-P1P2	-0.032058	0.0791709	0.0707529	-0.032058	0.344161	1.43981	-0.032058	-0.244433	-0.544986	-0.0751887	0.224762	0.207436
ACOT2_+_74036024.23-P1P2	-0.0273169	-0.145368	-0.3676	-0.0273169	0.224262	0.912111	-0.0273169	0.0171154	-0.0419604	0.0384329	-0.198641	-0.243752
ACOT2_+_74036035.23-P1P2	0.00951381	0.103444	0.245062	0.00951381	-0.0879205	-0.324038	0.00951381	-0.271999	-0.477206	-0.0149698	0.549237	0.969045
ACOT2_+_74036054.23-P1P2	0.0173278	-0.422652	-0.791936	0.0173278	0.226704	1.17469	0.0173278	0.0638115	0.173602	0.0397308	-0.418017	-0.640063
ACOT2_-_74036039.23-P1P2	-0.0662897	0.181524	0.173848	-0.0662897	-0.144037	-1.01018	-0.0662897	0.0427289	-0.105931	-0.0899447	-0.0120926	-0.266069
ACOT2_-_74036051.23-P1P2	-0.00417788	-0.0849066	-0.175929	-0.00417788	-0.113085	-0.517458	-0.00417788	0.0332966	0.0547551	-0.00480062	0.337168	0.611101
ACOT2_-_74036080.23-P1P2	-0.0287282	0.207669	0.339837	-0.0287282	-0.0156185	-0.204984	-0.0287282	0.183426	0.265189	0.0403165	-0.0198149	0.0876109
ACOT2_-_74036118.23-P1P2	-0.101426	0.112005	-0.0722623	-0.101426	0.190817	0.340333	-0.101426	0.16393	0.01998	0.00481628	0.00209912	0.0273396
ACOT2_-_74036501.23-P1P2	0.00932822	-0.166418	-0.299517	0.00932822	0.324004	1.57956	0.00932822	0.111966	0.24074	0.0327318	0.290983	0.632858
ACOT4_+_74058581.23-P1P2	0.0187182	-0.106784	-0.150979	0.0187182	-0.124256	-0.440234	0.0187182	-0.126908	-0.179282	-0.0224607	-0.178904	-0.379682
ACOT4_+_74058635.23-P1P2	-0.00601263	0.122342	0.236332	-0.00601263	0.492613	2.27282	-0.00601263	0.269105	0.490734	0.0011778	0.0729295	0.146208
ACOT4_+_74058647.23-P1P2	-0.0996614	-0.234065	-0.764591	-0.0996614	-0.0876403	-0.937258	-0.0996614	-0.278478	-0.802795	-0.263827	0.361265	-0.0762585
ACOT4_+_74058687.23-P1P2	-0.0772521	-0.306145	-0.842313	-0.0772521	0.0725936	-0.0702391	-0.0772521	-0.0272524	-0.268356	-0.0908558	0.447068	0.56852
ACOT4_+_74058910.23-P1P2	0.0241811	-0.220738	-0.364227	0.0241811	0.359651	1.82799	0.0241811	-0.0878592	-0.0905285	-0.0459699	0.272011	0.376073
ACOT4_+_74058918.23-P1P2	0.00776108	-0.0658178	-0.101441	0.00776108	-0.0443629	-0.132504	0.00776108	0.0211344	0.0662763	-0.103872	0.280472	0.228028
ACOT4_+_74059053.23-P1P2	-0.0206865	0.0665472	0.0796001	-0.0206865	-0.206234	-1.04108	-0.0206865	-0.255206	-0.532494	0.0116232	-0.137031	-0.207112
ACOT4_+_74059070.23-P1P2	-0.0689168	-0.157632	-0.517784	-0.0689168	0.326749	1.15183	-0.0689168	0.489011	0.721614	0.0384289	0.167055	0.422991
ACOT4_-_74059158.23-P1P2	-0.0262888	0.333081	0.600013	-0.0262888	-0.221114	-1.14141	-0.0262888	-0.0678552	-0.198006	-0.0155709	-0.151205	-0.30973
ACOT4_-_74059268.23-P1P2	0.0510614	-0.0215555	0.118378	0.0510614	-0.0631092	0.0245434	0.0510614	0.118504	0.372799	0.0121551	-0.0992126	-0.136657
ACOT6_+_74077704.23-P1P2	-0.00573277	0.303586	0.602549	-0.00573277	-0.00118326	-0.00880396	-0.00573277	-0.107167	-0.212547	-0.0573013	0.118872	0.0648715
ACOT6_+_74077926.23-P1P2	0.0372761	0.142765	0.408058	0.0372761	0.0883349	0.647191	0.0372761	0.273705	0.623634	0.00791432	0.163634	0.330603
ACOT6_+_74078053.23-P1P2	-0.0373813	-0.0825573	-0.271332	-0.0373813	-0.0474369	-0.40081	-0.0373813	0.0629487	0.0149064	0.0483308	-0.0314565	0.0890114
ACOT6_+_74078097.23-P1P2	-0.0979741	-0.0432663	-0.374868	-0.0979741	0.265845	0.706669	-0.0979741	0.237221	0.167031	-0.0735426	0.184208	0.138142
ACOT6_+_74078110.23-P1P2	-0.0069618	0.314668	0.621182	-0.0069618	0.0715368	0.320519	-0.0069618	-0.0277766	-0.0675191	-0.0187523	-0.197603	-0.403307
ACOT6_-_74077642.23-P1P2	-0.0210243	0.0460275	0.0372153	-0.0210243	0.141184	0.563395	-0.0210243	0.0778937	0.0898361	-0.0592216	0.015992	-0.128125
ACOT6_-_74077963.23-P1P2	0.0817857	-0.574727	-0.904107	0.0817857	-0.0521442	0.248181	0.0817857	0.0319917	0.299133	-0.00197	-0.498051	-0.903715
ACOT6_-_74077984.23-P1P2	-0.0192919	0.147806	0.247618	-0.0192919	-0.196346	-0.987512	-0.0192919	0.145636	0.221571	0.0231836	-0.438731	-0.724547
ACOT6_-_74078059.23-P1P2	-0.0578209	0.274078	0.38597	-0.0578209	0.0680128	0.017953	-0.0578209	-0.0244101	-0.207247	0.00717033	-0.121642	-0.191626
ACOT6_-_74078124.23-P1P2	-0.0231504	0.449634	0.844441	-0.0231504	-0.136418	-0.732138	-0.0231504	-0.358517	-0.732886	-0.0376914	0.0248466	-0.0511959
ACOT7_+_6453356.23-P1P2	-0.0303784	-0.0463791	-0.17728	-0.0303784	0.476967	2.06333	-0.0303784	0.210517	0.311144	0.0138262	0.321738	0.635557
ACOT7_-_6453209.23-P1P2	-0.0507417	-0.151456	-0.45052	-0.0507417	0.351661	1.36932	-0.0507417	0.403449	0.613694	0.021154	0.103872	0.259023
ACOT7_-_6453318.23-P1P2	0.00681199	-0.441229	-0.8611	0.00681199	-0.308183	-1.35769	0.00681199	-0.402954	-0.730008	-0.0638863	0.0526948	-0.0743764
ACOT7_-_6453331.23-P1P2	0.0503944	0.469794	1.10689	0.0503944	0.00904867	0.35443	0.0503944	-0.0585176	0.0396399	-0.050369	-0.0789538	-0.276241
ACOT7_-_6453334.23-P1P2	-0.0334949	0.222499	0.355356	-0.0334949	0.0115031	-0.10641	-0.0334949	0.412393	0.67995	0.0261799	0.16284	0.380725
ACOT7_-_6453354.23-P1P2	0.00234569	-0.30529	-0.600528	0.00234569	-0.135295	-0.583431	0.00234569	-0.00380302	0.00406443	-0.0257919	0.0701458	0.0649909
ACOT7_-_6453369.23-P1P2	0.0729906	-0.181622	-0.138166	0.0729906	-0.120585	-0.117777	0.0729906	0.011904	0.236292	0.0680418	-0.139416	-0.0521752
ACOT7_-_6453388.23-P1P2	-0.016287	0.0442494	0.0479181	-0.016287	0.256393	1.12276	-0.016287	-0.0295052	-0.0975282	0.023426	-0.249745	-0.379295
ACOT7_-_6453406.23-P1P2	-0.0101631	-0.0445709	-0.112667	-0.0101631	-0.0448253	-0.235532	-0.0101631	0.102321	0.166729	-0.070486	0.32674	0.406643
ACOT7_-_6453466.23-P1P2	-0.0187128	0.0566247	0.0655496	-0.0187128	0.359322	1.58503	-0.0187128	0.00932519	-0.0318333	-0.0232069	0.185267	0.282183
ACOT8_+_44485553.23-P1P2	0.0157827	-0.0631777	-0.0719262	0.0157827	0.116303	0.655529	0.0157827	-0.28247	-0.4788	0.0140144	-0.323199	-0.539791
ACOT8_+_44485579.23-P1P2	0.0214094	-0.0264746	0.0190336	0.0214094	0.115202	0.682108	0.0214094	0.0969454	0.247322	-0.0853763	-0.263222	-0.711042
ACOT8_+_44485987.23-P1P2	-0.0465183	-0.293594	-0.724321	-0.0465183	0.229439	0.827967	-0.0465183	-0.252833	-0.602223	-0.0307994	0.156627	0.20853
ACOT8_+_44486016.23-P1P2	0.0796478	0.130718	0.511564	0.0796478	-0.111184	-0.0368372	0.0796478	0.203261	0.613476	0.0480076	-0.389329	-0.564391
ACOT8_+_44486037.23-P1P2	-0.01468	0.0581185	0.0807239	-0.01468	0.217489	0.951924	-0.01468	-0.0025447	-0.0424652	-0.0479958	0.121261	0.0955002
ACOT8_-_44485597.23-P1P2	0.066181	-0.351597	-0.501358	0.066181	0.142676	1.06115	0.066181	-0.569473	-0.87114	0.00429024	-0.0567342	-0.0814131
ACOT8_-_44485644.23-P1P2	-0.0952426	-0.160287	-0.602533	-0.0952426	-0.0720431	-0.840268	-0.0952426	-0.144379	-0.539179	0.0214323	0.181236	0.40086
ACOT8_-_44485808.23-P1P2	-0.208931		-0.660528	-0.208931		-0.502731	-0.208931		-0.451199	-0.188548		-0.422194
ACOT8_-_44485992.23-P1P2	-0.0276761	0.0173002	-0.0407578	-0.0276761	0.238126	0.974193	-0.0276761	-0.0106163	-0.0948837	0.0145038	0.00574477	0.0613367
ACOT8_-_44486001.23-P1P2	-0.028568	-0.113354	-0.306834	-0.028568	0.0840987	0.256987	-0.028568	-0.263626	-0.570879	-0.0206084	0.264243	0.433511
ACOT9_+_23761133.23-P1P2	0.00482136	0.0133866	0.0493624	0.00482136	0.265574	1.28402	0.00482136	0.143768	0.287309	-0.00391553	0.293711	0.534367
ACOT9_+_23761144.23-P1P2	-0.0478998	0.0192229	-0.0978746	-0.0478998	-0.0822313	-0.620897	-0.0478998	0.158735	0.163942	0.027941	0.0132048	0.112875
ACOT9_+_23761350.23-P1P2	-0.0984285	-0.23082	-0.754331	-0.0984285	0.118476	0.0227144	-0.0984285	0.20973	0.114285	-0.0444394	-0.257903	-0.585769
ACOT9_+_23761355.23-P1P2	0.0122492	0.22017	0.488623	0.0122492	-0.281521	-1.2038	0.0122492	-0.141234	-0.224664	0.0299173	0.403181	0.829477
ACOT9_+_23761360.23-P1P2	0.0446183	-0.520414	-0.90671	0.0446183	0.323674	1.77667	0.0446183	0.210853	0.527105	0.0228839	-0.0454332	-0.00831414
ACOT9_-_23760942.23-P1P2	-0.00939164	0.104536	0.190247	-0.00939164	0.073211	0.314583	-0.00939164	-0.0848739	-0.181337	0.0823705	0.0102423	0.261141
ACOT9_-_23761181.23-P1P2
ACOT9_-_23761296.23-P1P2	0.0394931	0.109725	0.348139	0.0394931	0.134326	0.872322	0.0394931	-0.202808	-0.261658	0.118606	-0.212157	-0.0420455
ACOT9_-_23761316.23-P1P2	0.0236513	0.135392	0.352105	0.0236513	0.0957342	0.604714	0.0236513	-0.0601434	-0.0401876	-0.0538008	0.366679	0.526568
ACOT9_-_23761394.23-P1P2	0.0112227	0.276235	0.598548	0.0112227	0.0245662	0.205693	0.0112227	-0.265399	-0.459948	-0.0569044	0.287673	0.373758
ACOX1_+_73974830.23-P1P2	-0.0316179	0.0790285	0.0717932	-0.0316179	0.0953285	0.291744	-0.0316179	-0.0901497	-0.255025	-0.0145871	0.408224	0.713024
ACOX1_+_73975184.23-P1P2	-0.0363339	0.0542081	0.00753439	-0.0363339	0.217381	0.829542	-0.0363339	-0.479685	-0.99747	-0.0717965	0.169186	0.115684
ACOX1_+_73975227.23-P1P2	0.010981	-0.132575	-0.226308	0.010981	0.00437827	0.110988	0.010981	-0.232968	-0.399959	0.00565708	0.012674	0.0489939
ACOX1_+_73975249.23-P1P2	0.0164409	0.321581	0.705699	0.0164409	0.201462	1.05299	0.0164409	0.110345	0.25813	-0.0182341	0.19179	0.308115
ACOX1_-_73974792.23-P1P2	0.0412002	-0.217255	-0.305876	0.0412002	-0.073962	-0.0811432	0.0412002	-0.261237	-0.36609	-0.0738799	0.739757	1.15009
ACOX1_-_73974876.23-P1P2	-0.0403517	0.274021	0.438542	-0.0403517	0.172389	0.59889	-0.0403517	0.176619	0.219079	0.0130206	-0.288177	-0.478741
ACOX1_-_73975169.23-P1P2	0.00157304	-0.0281024	-0.0440726	0.00157304	-0.00685744	0.00608232	0.00157304	0.113873	0.222043	-0.0244642	0.428863	0.722769
ACOX1_-_73975193.23-P1P2	0.0919662	-0.235528	-0.189607	0.0919662	-0.174017	-0.258028	0.0919662	-0.271692	-0.239894	0.0126802	0.0224454	0.0866374
ACOX1_-_73975196.23-P1P2	0.000529241	0.102871	0.216811	0.000529241	-0.173425	-0.769962	0.000529241	-0.11219	-0.203966	0.0130782	0.0532323	0.143893
ACOX1_-_73975245.23-P1P2	0.00315583	0.100887	0.220732	0.00315583	-0.165699	-0.719455	0.00315583	-0.0926518	-0.159864	0.0571164	-0.0601186	0.0615574
ACOX2_+_58512259.23-P2	-0.0270866	0.104558	0.136925	-0.0270866	-0.0579913	-0.391665	-0.0270866	-0.0860643	-0.23437	-0.0304223	-0.332895	-0.682924
ACOX2_+_58512291.23-P2	0.0942913	-0.481115	-0.677677	0.0942913	-0.158674	-0.173996	0.0942913	0.00500622	0.284544	0.00898597	-0.302253	-0.515797
ACOX2_+_58512428.23-P2	0.0254976	0.225727	0.539781	0.0254976	0.025813	0.291807	0.0254976	-0.087894	-0.0868135	0.0434143	0.291517	0.663991
ACOX2_+_58512441.23-P2	-0.0292547	0.166334	0.25492	-0.0292547	0.335781	1.41684	-0.0292547	0.239333	0.368292	-0.0381401	0.217936	0.299587
ACOX2_+_58522495.23-P1	0.040105	0.0614403	0.252647	0.040105	-0.313733	-1.19595	0.040105	-0.125142	-0.114572	-0.022922	0.108999	0.143932
ACOX2_+_58522520.23-P1	0.0460933	-0.389716	-0.638785	0.0460933	0.105099	0.774332	0.0460933	-0.104982	-0.0596535	0.0225864	0.0522527	0.168951
ACOX2_+_58522693.23-P1	0.0972014	0.0206044	0.342523	0.0972014	0.0543842	0.827514	0.0972014	0.0457224	0.369088	0.0535095	-0.357501	-0.490827
ACOX2_+_58522852.23-P1	-0.072103	0.365355	0.526903	-0.072103	0.0798245	-0.00782223	-0.072103	0.110635	0.0044437	-0.0483082	-0.0815998	-0.275247
ACOX2_+_58522860.23-P1	0.0303002	0.0350336	0.169843	0.0303002	-0.00168851	0.191679	0.0303002	0.0920985	0.26378	-0.0357076	-0.122196	-0.31369
ACOX2_+_58522888.23-P1	0.0230051	-0.0243034	0.0282232	0.0230051	-0.121475	-0.403246	0.0230051	-0.186172	-0.277869	0.0174442	0.094936	0.232255
ACOX2_+_58522893.23-P1	-0.0525548	0.335434	0.525541	-0.0525548	-0.21085	-1.2418	-0.0525548	0.0610601	-0.0321939	-0.0105105	0.153821	0.260694
ACOX2_-_58512038.23-P2	-0.00338731	-0.458822	-0.927327	-0.00338731	0.164045	0.768375	-0.00338731	0.185059	0.341004	0.0589396	-0.363972	-0.487295
ACOX2_-_58512043.23-P2	0.000381863	0.270597	0.554487	0.000381863	0.271126	1.28471	0.000381863	-0.0795992	-0.143405	-0.0218213	0.132685	0.190224
ACOX2_-_58512058.23-P2	0.0152393	-0.131125	-0.210541	0.0152393	0.571679	2.75802	0.0152393	-0.196447	-0.319393	0.0139558	0.281868	0.56323
ACOX2_-_58512157.23-P2	0.0565062	-0.00957233	0.158956	0.0565062	-0.136241	-0.282954	0.0565062	-0.085333	0.00701095	0.0450758	0.250071	0.593116
ACOX2_-_58512421.23-P2	-0.00940199	0.15068	0.283238	-0.00940199	-0.19881	-0.943235	-0.00940199	-0.261995	-0.512797	-0.00398551	0.101258	0.183282
ACOX2_-_58512435.23-P2	0.000142981	-0.0772431	-0.147449	0.000142981	-0.280021	-1.26501	0.000142981	-0.0215815	-0.0355273	-0.0197671	-0.221767	-0.450227
ACOX2_-_58522790.23-P1	-0.0601939	0.0865567	0.000786507	-0.0601939	0.387878	1.48358	-0.0601939	-0.1113	-0.37665	0.0699319	-0.104568	0.0166958
ACOX2_-_58522878.23-P1	0.0461933	0.239	0.628954	0.0461933	-0.0583719	0.0190466	0.0461933	-0.194085	-0.226097	-0.0145813	-0.0449146	-0.113142
ACOX2_-_58522905.23-P1	0.0137979	-0.199508	-0.352743	0.0137979	0.509708	2.46337	0.0137979	-0.202808	-0.335434	0.000440998	-0.143295	-0.250102
ACOX3_+_8429824.23-P1	0.0750242	-0.00215236	0.229763	0.0750242	-0.277605	-0.832354	0.0750242	-0.23936	-0.228038	0.0975564	0.00959447	0.302834
ACOX3_+_8430042.23-P1	0.0438206	0.243448	0.630765	0.0438206	0.0241519	0.387261	0.0438206	0.154063	0.418549	0.0826213	0.0864165	0.400733
ACOX3_+_8430113.23-P1	0.0126583	-0.139597	-0.235405	0.0126583	-0.179798	-0.731156	0.0126583	-0.117291	-0.178687	-0.00290586	0.161481	0.29613
ACOX3_+_8430140.23-P1	0.0194727	-0.0660045	-0.0664961	0.0194727	-0.249443	-1.01482	0.0194727	-0.0937029	-0.114982	0.0217915	-0.127445	-0.160926
ACOX3_+_8430181.23-P1	-0.069587	-0.274484	-0.755369	-0.069587	-0.120529	-0.920048	-0.069587	-0.319933	-0.794016	-0.00355514	-0.356663	-0.650406
ACOX3_+_8430200.23-P1	-0.0408776	-0.127665	-0.37281	-0.0408776	-0.0482324	-0.424168	-0.0408776	-0.243234	-0.568066	0.121754	-0.253395	-0.108344
ACOX3_+_8442240.23-P2	-0.0707167	0.487538	0.777394	-0.0707167	-0.0965419	-0.815495	-0.0707167	-0.356837	-0.866315	-0.0917191	0.452779	0.576496
ACOX3_+_8442373.23-P2	0.0201484	-0.0111224	0.0461793	0.0201484	0.326166	1.65046	0.0201484	-0.0763899	-0.0806457	0.0457979	-0.278621	-0.36878
ACOX3_+_8442383.23-P2	0.0157347	0.192214	0.442777	0.0157347	0.195843	1.02304	0.0157347	0.0969659	0.231067	0.0148988	-0.0133742	0.0275935
ACOX3_+_8442429.23-P2	0.0106501	-0.540224	-1.04909	0.0106501	0.180134	0.921777	0.0106501	0.147351	0.310749	0.00806771	-0.0244841	-0.0119486
ACOX3_+_8442463.23-P2	0.016672	0.237117	0.536125	0.016672	-0.0494865	-0.106037	0.016672	0.312573	0.637205	0.0730598	-0.155758	-0.0678044
ACOX3_+_8442467.23-P2	0.0372443	0.158284	0.439248	0.0372443	0.401854	2.09665	0.0372443	-0.448928	-0.728657	0.0455899	-0.121623	-0.0831217
ACOX3_-_8429711.23-P1	0.0299629	-0.412993	-0.734358	0.0299629	-0.233235	-0.880833	0.0299629	0.0643228	0.210837	0.029664	-0.427116	-0.685074
ACOX3_-_8430094.23-P1	0.0190627	-0.333493	-0.606967	0.0190627	-0.047298	-0.0824609	0.0190627	-0.140875	-0.204428	-0.060145	0.530456	0.807262
ACOX3_-_8430121.23-P1	0.0658018	0.485386	1.18478	0.0658018	0.0754851	0.74834	0.0658018	0.0805602	0.344122	0.0173702	-0.0680521	-0.0651205
ACOX3_-_8430129.23-P1	0.0238183	-0.174099	-0.271299	0.0238183	0.0787808	0.527266	0.0238183	-0.133194	-0.176401	-0.0325595	0.177225	0.241117
ACOX3_-_8442139.23-P2	-0.0176995	-0.377531	-0.806614	-0.0176995	0.549693	2.47096	-0.0176995	-0.141071	-0.310346	-0.0506682	-0.0159459	-0.162207
ACOX3_-_8442145.23-P2	-0.234897		-0.392815	-0.234897		-0.430781	-0.234897	0.5249	0.312206	-0.168098	0.4394	0.336466
ACOX3_-_8442419.23-P2	-0.0244738	0.126536	0.18911	-0.0244738	-0.122108	-0.673419	-0.0244738	-0.151811	-0.349895	-0.00907872	-0.17473	-0.334293
ACOX3_-_8442435.23-P2	-0.00259919	0.392968	0.792187	-0.00259919	-0.0143259	-0.0519345	-0.00259919	0.0664939	0.121407	-0.00723251	0.121932	0.211808
ACOXL_+_111490261.23-P1P2	-0.0861279	-0.218569	-0.692536	-0.0861279	-0.0750309	-0.802779	-0.0861279	0.0758495	-0.100915	-0.0995467	0.42676	0.506959
ACOXL_+_111490271.23-P1P2	0.0468635	0.320709	0.795694	0.0468635	0.0692467	0.612897	0.0468635	0.129183	0.38073	-0.014557	0.165849	0.2712
ACOXL_+_111490383.23-P1P2	-0.0698572	-0.0822836	-0.368725	-0.0698572	0.515593	2.01971	-0.0698572	0.0749178	-0.0559422	-0.0118131	-0.0349242	-0.0871117
ACOXL_+_111490544.23-P1P2	-0.0091395	-0.263786	-0.5515	-0.0091395	0.0999736	0.439746	-0.0091395	0.0193733	0.0144559	-0.0981245	0.294046	0.269003
ACOXL_+_111490547.23-P1P2	-0.0579226	-0.0738932	-0.315817	-0.0579226	0.218075	0.711233	-0.0579226	0.316809	0.430955	-0.0437283	0.12711	0.118211
ACOXL_+_111490560.23-P1P2	-0.0725949	-0.013308	-0.237933	-0.0725949	0.0252959	-0.262719	-0.0725949	0.194359	0.159698	-0.0471826	0.372667	0.55617
ACOXL_+_111490595.23-P1P2	0.0408433	-0.105043	-0.0807421	0.0408433	-0.354596	-1.38073	0.0408433	0.0450591	0.206031	0.00962912	0.186505	0.377145
ACOXL_-_111490250.23-P1P2	0.0368244	-0.0591455	-0.000337731	0.0368244	-0.0295254	0.0996907	0.0368244	-0.39619	-0.631179	0.0379455	0.0647063	0.23502
ACOXL_-_111490612.23-P1P2	0.0421827	-0.212728	-0.293786	0.0421827	0.345185	1.86242	0.0421827	-0.403718	-0.629882	0.0377398	0.151835	0.393295
ACOXL_-_111490664.23-P1P2	0.247176	-0.15986	0.431034	0.247176	-0.445834	-0.641209	0.247176	-0.233436	0.277334	0.0149629	-0.526272	-0.907364
ACP1_+_264980.23-P1P2	0.0403516	-0.0914887	-0.054901	0.0403516	0.348797	1.86882	0.0403516	-0.126911	-0.117174	-0.0168283	0.301574	0.512247
ACP1_+_265303.23-P1P2	0.00183508	0.153615	0.323044	0.00183508	-0.150395	-0.656125	0.00183508	0.0850823	0.168922	0.0104392	0.329914	0.640902
ACP1_-_264936.23-P1P2	0.0100001	0.147863	0.336073	0.0100001	0.349356	1.70056	0.0100001	0.10434	0.2284	0.0408469	0.107624	0.321461
ACP1_-_264967.23-P1P2	0.0310807	0.00236185	0.106333	0.0310807	0.24371	1.33074	0.0310807	-0.243131	-0.361264	0.0408638	0.0500795	0.216591
ACP1_-_264970.23-P1P2	-0.295115		-0.902409	-0.295115		-0.967032	-0.295115	0.348411	-0.190941	-0.112383	-0.117345	-0.52132
ACP1_-_264976.23-P1P2	0.0483519	0.0461203	0.246635	0.0483519	0.218997	1.31368	0.0483519	0.0243212	0.188785	0.0244067	0.055968	0.180864
ACP1_-_265107.23-P1P2	-0.0379444	-0.0238194	-0.15462	-0.0379444	0.0194932	-0.0945111	-0.0379444	0.275266	0.41058	0.0588768	0.0157108	0.204783
ACP1_-_265135.23-P1P2	0.0266071	0.0493677	0.187601	0.0266071	0.505794	2.51737	0.0266071	-0.146797	-0.193849	0.0791578	-0.351514	-0.407499
ACP1_-_265335.23-P1P2	-0.0378534	0.158536	0.213268	-0.0378534	-0.161464	-0.930701	-0.0378534	0.176936	0.226846	0.0322855	0.0596148	0.209757
ACP1_-_265360.23-P1P2	0.0123843	0.14074	0.328905	0.0123843	0.0682287	0.414116	0.0123843	0.0428974	0.120274	0.00237766	-0.150632	-0.258012
ACP2_+_47270142.23-P1P2	0.0318292	0.0394958	0.18345	0.0318292	-0.197979	-0.707314	0.0318292	0.172992	0.419539	0.0164669	0.195177	0.41226
ACP2_+_47270309.23-P1P2	0.0108021	0.154954	0.352788	0.0108021	0.0133647	0.151533	0.0108021	0.202879	0.415091	0.0382999	-0.482383	-0.761456
ACP2_+_47270320.23-P1P2	-0.0709497	0.14204	0.0801967	-0.0709497	-0.0123006	-0.427295	-0.0709497	0.380853	0.513392	0.0127632	0.161759	0.340875
ACP2_+_47270332.23-P1P2	0.0982942	-0.28706	-0.274406	0.0982942	-0.130762	-0.0224083	0.0982942	-0.332831	-0.336129	-0.0579486	0.301826	0.396615
ACP2_-_47269906.23-P1P2	0.00451038	-0.362399	-0.709128	0.00451038	-0.192066	-0.833746	0.00451038	-0.410103	-0.749993	0.104174	0.323783	0.894359
ACP2_-_47269915.23-P1P2	-0.00474439	0.112812	0.220946	-0.00474439	-0.0805792	-0.370349	-0.00474439	-0.450948	-0.852996	-0.0591812	0.0815259	-0.00852656
ACP2_-_47269943.23-P1P2	-0.0164127	0.304097	0.571369	-0.0164127	-0.050032	-0.294783	-0.0164127	0.0851751	0.116702	0.0956767	0.0440919	0.360424
ACP2_-_47269958.23-P1P2	0.0572968	-0.0435775	0.0927891	0.0572968	0.14831	1.0372	0.0572968	-0.0196676	0.132155	-0.13108	0.403155	0.374893
ACP2_-_47270292.23-P1P2	0.0151229	-0.0852853	-0.118483	0.0151229	0.0103253	0.161799	0.0151229	0.236457	0.490329	-0.0322999	-0.20917	-0.462644
ACP2_-_47270385.23-P1P2	0.0377621	0.396866	0.92177	0.0377621	0.0293668	0.377272	0.0377621	-0.218771	-0.296498	0.0302622	-0.326613	-0.500142
ACP5_+_11688472.23-P1	-0.00516197	0.054399	0.101931	-0.00516197	-0.116238	-0.537578	-0.00516197	-0.263443	-0.503333	-0.0272533	0.0171015	-0.0358476
ACP5_+_11688484.23-P1	-0.0449663	-0.255969	-0.643791	-0.0449663	0.178769	0.602419	-0.0449663	0.0175993	-0.09173	0.00484178	0.248414	0.476505
ACP5_+_11689300.23-P2	-0.0324678	0.222582	0.358621	-0.0324678	-0.0141664	-0.219319	-0.0324678	0.00509605	-0.0792405	0.044078	0.364219	0.798418
ACP5_+_11689329.23-P2	0.00996047	0.0530103	0.144739	0.00996047	-0.274149	-1.1826	0.00996047	0.0258884	0.081487	-0.00810349	-0.0472293	-0.0990739
ACP5_+_11689378.23-P2	0.0390064	-0.182926	-0.243289	0.0390064	0.467718	2.41111	0.0390064	0.0782901	0.262939	0.010266	-0.0999714	-0.143374
ACP5_+_11689751.23-P2	-0.0640434	0.0700895	-0.0440198	-0.0640434	0.01683	-0.253729	-0.0640434	0.108861	0.0242649	-0.0291449	0.159913	0.219193
ACP5_-_11688043.23-P1	0.0150678	0.108098	0.271195	0.0150678	0.0946326	0.551306	0.0150678	0.0131625	0.0723384	0.0150649	0.0334673	0.113466
ACP5_-_11688058.23-P1	0.0305447	-0.108191	-0.118148	0.0305447	0.0403501	0.387432	0.0305447	-0.108545	-0.110964	0.0700012	-0.0870636	0.0488073
ACP5_-_11688064.23-P1	-0.111246	0.0399701	-0.247096	-0.111246	0.168704	0.182811	-0.111246	0.279741	0.20849	-0.147784	-0.0910585	-0.573338
ACP5_-_11688086.23-P1	0.0273763	-0.111686	-0.13475	0.0273763	0.115581	0.717449	0.0273763	-0.142974	-0.184487	-0.0723368	-0.341232	-0.816459
ACP5_-_11688218.23-P1	0.00442353	-0.102168	-0.184785	0.00442353	0.22776	1.10694	0.00442353	0.405755	0.7764	0.0569768	0.217776	0.567833
ACP5_-_11688414.23-P1	0.0302793	0.298218	0.700338	0.0302793	-0.0384533	0.02157	0.0302793	-0.0632609	-0.0269905	-0.0178389	0.0370196	0.027047
ACP5_-_11688437.23-P1	0.0557173	-0.324773	-0.478841	0.0557173	-0.0623064	0.0544621	0.0557173	0.159043	0.462026	-0.0470224	0.00385208	-0.115818
ACP5_-_11688455.23-P1	-0.0106104	0.134277	0.246526	-0.0106104	0.164323	0.729002	-0.0106104	0.0662813	0.0980073	-0.0533877	-0.00541369	-0.150682
ACP5_-_11689356.23-P2	0.0162111	0.00763548	0.0721191	0.0162111	-0.256291	-1.06485	0.0162111	-0.281393	-0.475555	0.0174706	0.168875	0.367138
ACP5_-_11689724.23-P2	0.0356282	-0.293637	-0.476661	0.0356282	0.43325	2.23272	0.0356282	0.00927039	0.124089	0.05284	-0.103791	-0.0301409
ACP5_-_11689727.23-P2	-0.000401615	0.175875	0.361172	-0.000401615	0.0439408	0.229847	-0.000401615	-0.158459	-0.293218	0.0257272	0.0369166	0.149857
ACP5_-_11689744.23-P2	-0.00617613	-0.0454554	-0.102426	-0.00617613	0.0228882	0.100001	-0.00617613	0.0136659	0.0122846	0.00579281	0.100294	0.20913
ACP5_-_11689771.23-P2	-0.0231352	0.44128	0.827644	-0.0231352	0.5318	2.35763	-0.0231352	0.0411574	0.015034	-0.0134873	0.200366	0.337153
ACP5_-_11689778.23-P2	0.0139422	-0.0424653	-0.0357225	0.0139422	-0.161806	-0.640739	0.0139422	-0.0781846	-0.101823	-0.00828427	-0.092844	-0.182751
ACP6_+_147141933.23-P1P2	0.020708	0.0564393	0.184066	0.020708	0.0211409	0.243245	0.020708	0.0312327	0.122346	0.00456981	0.140904	0.279718
ACP6_+_147141956.23-P1P2	0.0246815	-0.115208	-0.149976	0.0246815	0.0305353	0.309048	0.0246815	-0.151367	-0.207928	-0.00915015	-0.0475146	-0.102549
ACP6_+_147142089.23-P1P2	0.0094838	-0.00519991	0.0259551	0.0094838	0.0968231	0.530004	0.0094838	0.189777	0.386789	0.00467422	-0.149474	-0.249416
ACP6_+_147142126.23-P1P2	-0.00605869	0.0659859	0.122585	-0.00605869	0.0568494	0.257691	-0.00605869	0.151755	0.271015	-0.0578315	0.105619	0.0392124
ACP6_+_147142159.23-P1P2	-0.290374	0.46109	0.0616119	-0.290374		-0.674971	-0.290374	0.428511	-0.0274439	-0.0862632	-0.0215283	-0.272879
ACP6_+_147142188.23-P1P2	-0.0463986	0.0156388	-0.100572	-0.0463986	0.300223	1.15593	-0.0463986	0.0704837	0.00311555	-0.0377557	-0.0617093	-0.20919
ACP6_-_147141887.23-P1P2	-0.00644495	-0.164974	-0.344176	-0.00644495	-0.0166987	-0.0845523	-0.00644495	0.144451	0.256239	-0.0128833	-0.136349	-0.275055
ACP6_-_147142348.23-P1P2	0.00922168	-0.0685188	-0.102481	0.00922168	-0.147734	-0.602246	0.00922168	-0.00826024	0.0154665	-0.100952	-0.212909	-0.663283
ACP6_-_147142356.23-P1P2	-0.0236265	0.149464	0.237887	-0.0236265	-0.131228	-0.710816	-0.0236265	-0.311763	-0.646765	0.00718766	-0.221566	-0.373762
ACP6_-_147142393.23-P1P2	-0.0638115	0.157284	0.132457	-0.0638115	-0.0158851	-0.403691	-0.0638115	0.106461	0.0204401	-0.000181439	-0.2452	-0.437656
ACPL2_+_140950667.23-P1P2	-0.0703366	0.0242867	-0.155334	-0.0703366	-0.0876403	-0.772197	-0.0703366	0.0569373	-0.0909638	-0.0206084	0.0138926	-0.0229382
ACPL2_+_140950939.23-P1P2	0.0715221	-0.254664	-0.289842	0.0715221	-0.263966	-0.789003	0.0715221	-0.274849	-0.3045	-0.0362869	0.143968	0.169956
ACPL2_+_140950942.23-P1P2	0.015194	0.00804465	0.0698764	0.015194	-0.322085	-1.37479	0.015194	0.165344	0.357464	0.013728	0.201749	0.416509
ACPL2_+_140950963.23-P1P2
ACPL2_+_140951037.23-P1P2	-0.0125638	-0.291866	-0.618433	-0.0125638	-0.00601837	-0.0696102	-0.0125638	-0.337761	-0.663649	-0.111733	-0.120593	-0.525406
ACPL2_+_140951054.23-P1P2	-0.0644161		-0.44737	-0.0644161		-0.345219	-0.0644161		-0.500795	-0.153275		-0.369254
ACPL2_+_140951088.23-P1P2	0.0513071	0.158635	0.482368	0.0513071	-0.203339	-0.622465	0.0513071	-0.326557	-0.459298	0.0484461	-0.016161	0.117224
ACPL2_+_140951203.23-P1P2	0.001993	0.287339	0.593097	0.001993	0.238976	1.14512	0.001993	0.179338	0.345748	-0.00695688	0.00681214	0.0026941
ACPL2_-_140950647.23-P1P2	-0.000939269	0.365423	0.741665	-0.000939269	-0.210653	-0.950363	-0.000939269	-0.219636	-0.409237	-0.0697413	0.185134	0.150562
ACPL2_-_140951141.23-P1P2	0.00688654	0.34044	0.714902	0.00688654	0.0848565	0.460054	0.00688654	-0.137917	-0.233854	0.0430338	-0.23871	-0.303816
ACPP_+_132036268.23-P1P2	0.025301	0.195235	0.477718	0.025301	0.160833	0.914999	0.025301	0.125767	0.312428	0.00339978	-0.373375	-0.661241
ACPP_+_132036293.23-P1P2	-0.00441473	-0.267291	-0.544315	-0.00441473	0.176138	0.818507	-0.00441473	0.228986	0.420251	0.00676617	-0.266978	-0.457749
ACPP_+_132036338.23-P1P2	-0.0512607	-0.326476	-0.80491	-0.0512607	-0.0341805	-0.417639	-0.0512607	0.0808005	0.00846015	-0.213658		-0.323702
ACPP_+_132036344.23-P1P2	-0.0258639	-0.382563	-0.841383	-0.0258639	0.0985816	0.339172	-0.0258639	-0.204323	-0.452147	0.0274307	-0.447707	-0.728922
ACPP_+_132036504.23-P1P2	0.0412002	0.182169	0.499329	0.0412002	-0.0818849	-0.117777	0.0412002	-0.217792	-0.284795	0.0359064	0.320285	0.695244
ACPP_+_132036703.23-P1P2	0.0387452	-0.234644	-0.348336	0.0387452	0.217795	1.25405	0.0387452	-0.0528113	0.0168704	0.0542023	0.248146	0.615372
ACPP_+_132036714.23-P1P2	-0.0539865	0.146743	0.140837	-0.0539865	0.153021	0.432593	-0.0539865	-0.0275504	-0.202113	-0.0517106	0.135287	0.110584
ACPP_+_132036719.23-P1P2	-0.0312673	-0.18297	-0.455316	-0.0312673	-0.0610235	-0.429218	-0.0312673	0.146261	0.188357	-0.0443895	-0.0645415	-0.233083
ACPP_-_132036256.23-P1P2	-0.076821	-0.0410732	-0.30665	-0.076821	0.30882	1.02444	-0.076821	-0.131619	-0.46241	-0.0238108	-0.0797183	-0.202655
ACPP_-_132036481.23-P1P2	-0.0377928	-0.118551	-0.345134	-0.0377928	0.201018	0.745669	-0.0377928	-0.340979	-0.742109	0.00844833	-0.292835	-0.500142
ACPT_+_51293697.23-ENST00000270593.1	0.0182222	-0.529676	-1.00499	0.0182222	-0.0659414	-0.173395	0.0182222	0.17421	0.382749	0.0095587	0.114769	0.246153
ACPT_+_51293752.23-ENST00000270593.1	0.0372311	-0.0678133	-0.0165846	0.0372311	-0.274572	-1.03106	0.0372311	-0.0178924	0.0778636	0.0433139	-0.0460534	0.048234
ACPT_+_51293761.23-ENST00000270593.1	0.0559233	0.0732464	0.324154	0.0559233	0.203858	1.2863	0.0559233	-0.292928	-0.383117	0.0448683	0.00999892	0.15482
ACPT_+_51294074.23-ENST00000270593.1	0.0185841	0.0955846	0.256574	0.0185841	-0.0784205	-0.229058	0.0185841	-0.0288595	0.00380241	0.036015	0.354935	0.758728
ACPT_+_51294085.23-ENST00000270593.1	-0.0303862	0.173876	0.266712	-0.0303862	0.361441	1.52912	-0.0303862	-0.0264277	-0.132251	-0.00684645	-0.123984	-0.235467
ACPT_+_51294143.23-ENST00000270593.1	-0.0874927	0.043479	-0.168385	-0.0874927	0.337452	1.09676	-0.0874927	0.178117	0.0865303	-0.0972023	0.143598	-0.00269747
ACPT_-_51293907.23-ENST00000270593.1	0.0132107	-0.0114164	0.0246632	0.0132107	0.357897	1.75812	0.0132107	0.0499156	0.135779	0.00253656	-0.115155	-0.19288
ACPT_-_51293910.23-ENST00000270593.1	-0.0429977	0.0487831	-0.0234997	-0.0429977	0.381184	1.54942	-0.0429977	0.117807	0.101432	-0.0147618	1.76688e-05	-0.0317292
ACPT_-_51294111.23-ENST00000270593.1	-0.0216539	-0.20887	-0.478536	-0.0216539	-0.236835	-1.18802	-0.0216539	-0.447976	-0.895985	0.00223456	-0.0439582	-0.063923
ACPT_-_51294122.23-ENST00000270593.1	-0.0670958	-0.296884	-0.793012	-0.0670958	-0.00169943	-0.356585	-0.0670958	-0.0410125	-0.264944	-0.000499921	-0.125185	-0.219739
ACRBP_+_6756117.23-P1P2	-0.0665414	0.169451	0.148752	-0.0665414	0.207836	0.615377	-0.0665414	0.0949587	-0.00892072	-0.00503267	0.0410274	0.0705094
ACRBP_+_6756534.23-P1P2	0.0421578	-0.0968459	-0.0602532	0.0421578	0.233154	1.34428	0.0421578	-0.170426	-0.193413	0.0319625	-0.0107131	0.0806201
ACRBP_+_6756555.23-P1P2	-0.0463896	-0.360396	-0.8586	-0.0463896	-0.0475652	-0.452108	-0.0463896	0.174359	0.197515	-0.0268222	0.229324	0.352302
ACRBP_+_6756569.23-P1P2	-0.00126364	0.0972757	0.200124	-0.00126364	0.274878	1.29279	-0.00126364	0.149774	0.281076	-0.00207612	-0.0972998	-0.173348
ACRBP_+_6756572.23-P1P2	-0.0172252	0.0427122	0.0419899	-0.0172252	0.159693	0.670363	-0.0172252	0.128735	0.195878	0.00648984	0.256769	0.496391
ACRBP_-_6756113.23-P1P2	0.0615559	-0.431857	-0.677105	0.0615559	0.192859	1.26715	0.0615559	-0.092982	0.00719662	-0.0742183	0.0657495	-0.0797439
ACRBP_-_6756126.23-P1P2	-0.0604684	-0.355295	-0.890777	-0.0604684	0.102323	0.161694	-0.0604684	0.122729	0.0604801	-0.0615738	0.356985	0.486948
ACRBP_-_6756147.23-P1P2	0.0209382	-0.0365557	-0.00270999	0.0209382	-0.0887995	-0.263797	0.0209382	-0.42224	-0.725536	0.0189062	0.211016	0.448026
ACRBP_-_6756321.23-P1P2	0.0195539	-0.156712	-0.249109	0.0195539	0.0722462	0.473048	0.0195539	-0.00457909	0.0520208	0.0298414	0.0118677	0.115802
ACRBP_-_6756581.23-P1P2	-0.00276684	0.147988	0.297822	-0.00276684	-0.138487	-0.62697	-0.00276684	-0.043766	-0.0853939	0.00940379	-0.133595	-0.207112
ACRC_+_70798298.23-P1P2	0.0321125	-0.207993	-0.314613	0.0321125	0.379067	1.9624	0.0321125	0.00953579	0.114491	0.0449238	-0.156923	-0.149363
ACRC_-_70797923.23-P1P2	-0.0901466	-0.0493006	-0.363425	-0.0901466	0.532513	1.98374	-0.0901466	-0.240869	-0.705102	-0.0315118	-0.0241205	-0.123028
ACRC_-_70798359.23-P1P2	0.0706615	-0.587646	-0.963699	0.0706615	0.166132	1.19483	0.0706615	-0.327774	-0.406005	0.0138137	-0.0215983	0.0095354
ACRC_-_70798376.23-P1P2	0.0468287	-0.27504	-0.405391	0.0468287	-0.132429	-0.319799	0.0468287	-0.196271	-0.228363	0.00390376	0.454037	0.848757
ACRC_-_70798668.23-P1P2	0.0799133	-0.168285	-0.0904009	0.0799133	-0.256037	-0.70511	0.0799133	0.025461	0.281537	-0.000969486	0.128672	0.241778
ACRC_-_70798671.23-P1P2	-0.0102141	0.114884	0.208626	-0.0102141	-0.275433	-1.30209	-0.0102141	-0.26579	-0.522231	-0.0898499	0.295733	0.29544
ACRC_-_70798717.23-P1P2	0.0379043	-0.0764145		0.0379043	-0.0113322		0.0379043	-0.182295		0.102969	-0.223861
ACRC_-_70798728.23-P1P2	-0.0159074	-0.373101	-0.792279	-0.0159074	0.112317	0.458726	-0.0159074	0.0876109	0.122711	0.0249316	0.0754937	0.217946
ACRC_-_70798784.23-P1P2	-0.011232	-0.000834411	-0.0277214	-0.011232	0.163174	0.720194	-0.011232	0.128738	0.213092	0.0388215	0.136683	0.368724
ACRC_-_70798787.23-P1P2	-0.0472577	0.193547	0.255484	-0.0472577	0.401218	1.61807	-0.0472577	0.212688	0.266744	-0.0575167	0.287032	0.37086
ACRV1_+_125550253.23-P1P2	-0.0560804	-0.0199282	-0.201472	-0.0560804	-0.1056	-0.774992	-0.0560804	-0.0182863	-0.190791	-0.0386998	0.0601896	0.0103962
ACRV1_+_125550289.23-P1P2	-0.0404709	0.0600762	0.00688708	-0.0404709	0.106674	0.294373	-0.0404709	-0.197522	-0.48136	0.0769386	0.218558	0.625615
ACRV1_+_125550420.23-P1P2	-0.0913381	0.368821	0.475878	-0.0913381	-0.0510364	-0.721161	-0.0913381	0.284329	0.274235	-0.0774216	0.492628	0.689516
ACRV1_+_125550697.23-P1P2	0.0168349	0.1477	0.356358	0.0168349	-0.211749	-0.855384	0.0168349	0.0579024	0.16113	0.019035	0.224472	0.472923
ACRV1_-_125550304.23-P1P2	-0.00618381	0.0371927	0.0641628	-0.00618381	-0.251967	-1.17091	-0.00618381	-0.0795907	-0.16224	0.0116906	-0.0327737	-0.0168341
ACRV1_-_125550308.23-P1P2	-0.0243957	-0.136779	-0.341475	-0.0243957	0.131645	0.500316	-0.0243957	0.168298	0.249322	0.0360187	-0.0176975	0.0793377
ACRV1_-_125550324.23-P1P2	0.0455585	-0.0471248	0.0502364	0.0455585	-0.0562529	0.0252713	0.0455585	0.13316	0.384425	-0.0141706	0.0966376	0.146102
ACRV1_-_125550488.23-P1P2	-0.0401835	-0.0140551	-0.141689	-0.0401835	0.328821	1.32314	-0.0401835	-0.143225	-0.378934	0.0211985	0.0744343	0.205475
ACRV1_-_125550545.23-P1P2	0.0200242	0.0398854	0.148632	0.0200242	0.202535	1.07812	0.0200242	-0.171714	-0.259373	0.0211657	-0.0934876	-0.10078
ACRV1_-_125550695.23-P1P2	-0.0885492	0.00471914	-0.249708	-0.0885492	-0.135635	-1.09663	-0.0885492	0.31696	0.343301	0.0233612	0.0493642	0.165872
ACR_+_51176655.23-P1P2	-0.0170096	0.11748	0.193366	-0.0170096	-0.185415	-0.924122	-0.0170096	0.232895	0.391404	-0.0358482	0.0390533	-0.0200897
ACR_+_51176910.23-P1P2	-0.0202712	-0.218969	-0.494724	-0.0202712	0.0811857	0.290218	-0.0202712	0.0285134	-0.000402446	-0.00716714	0.22522	0.400312
ACR_+_51177042.23-P1P2	0.0188437	-0.301128	-0.542381	0.0188437	-0.249276	-1.01759	0.0188437	-0.357247	-0.609934	0.0464082	-0.199443	-0.222697
ACR_+_51177061.23-P1P2	0.0141758	0.16752	0.388295	0.0141758	0.0934996	0.541047	0.0141758	0.0377249	0.115739	-0.00307773	-0.182972	-0.332378
ACR_+_51177099.23-P1P2	0.0654658	0.137728	0.482923	0.0654658	-0.27351	-0.867222	0.0654658	-0.218265	-0.216008	0.0215718	-0.0883788	-0.0903189
ACR_-_51176666.23-P1P2	0.0485421	0.238012	0.634045	0.0485421	0.32427	1.80151	0.0485421	-0.534715	-0.856745	0.0309085	-0.167055	-0.207404
ACR_-_51176714.23-P1P2	-0.0407446	0.161291	0.210101	-0.0407446	-0.148747	-0.888175	-0.0407446	0.0361082	-0.0449745	-0.00245286	0.138873	0.256189
ACR_-_51176829.23-P1P2	0.0564947	0.0322055	0.243142	0.0564947	0.109868	0.854932	0.0564947	0.0339649	0.230209	0.0521936	0.18521	0.494953
ACR_-_51177047.23-P1P2	0.00893001	-0.0471353	-0.0602532	0.00893001	-0.0634412	-0.214137	0.00893001	0.169448	0.347158	-0.00602725	-0.0815717	-0.155827
ACR_-_51177126.23-P1P2	0.0069064	-0.0698382	-0.112123	0.0069064	0.119831	0.621881	0.0069064	0.112054	0.233952	0.00628152	0.0668478	0.149529
ACSBG1_+_78526451.23-P1P2	0.0620251	-0.0104941	0.173742	0.0620251	-0.245771	-0.758328	0.0620251	0.033867	0.245905	0.0418231	0.276038	0.631276
ACSBG1_+_78526472.23-P1P2	0.0891967	-0.445049	-0.620335	0.0891967	0.148321	1.2168	0.0891967	-0.160452	-0.039691	-0.0168758	0.243919	0.406994
ACSBG1_+_78526497.23-P1P2	0.0163326	-0.377665	-0.704248	0.0163326	-0.0974221	-0.32959	0.0163326	-0.326305	-0.559245	0.0307776	-0.358648	-0.557096
ACSBG1_+_78526814.23-P1P2	0.0047492	0.127185	0.278552	0.0047492	0.482862	2.2883	0.0047492	0.112707	0.228981	0.0324029	0.212373	0.488604
ACSBG1_+_78526826.23-P1P2	-0.0144923	-0.12645	-0.290785	-0.0144923	-0.127316	-0.641317	-0.0144923	0.203234	0.343129	-0.00189016	-0.0412915	-0.0707061
ACSBG1_+_78526846.23-P1P2	0.0240059	-0.390274	-0.706524	0.0240059	-0.208174	-0.79849	0.0240059	-0.414822	-0.702848	-0.0674033	0.409498	0.566234
ACSBG1_+_78526895.23-P1P2	0.0485572	0.375079	0.910407	0.0485572	0.189514	1.17852	0.0485572	0.148559	0.421849	-0.00419364	0.442315	0.804524
[truncated: 207,072+ more rows]

## Sheet: C Cri screen (5sgRNAgene)
5 sgRNA/gene. Cyclophosphamide screen	sgRNA phenotype scores
	C
CRISPRi sgRNA	gamma	rho	tau
A1BG_+_58858549.23-P1	0.122679	0.152734	0.357795
A1BG_+_58858964.23-P1	0.0543442	-1.7689	-1.34024
A1BG_+_58864367.23-P2	0.161997	0.00899304	0.311624
A1BG_-_58858617.23-P1	-0.134919	-1.2476	-1.25417
A1BG_-_58858630.23-P1	-0.0253474	-0.495326	-0.44198
A1BG_-_58858788.23-P1	-0.00691867	0.308759	0.249834
A1BG_-_58864354.23-P2	0.0221602	0.423468	0.396631
A1BG_-_58864360.23-P2	0.0681357	0.0939283	0.210454
A1BG_-_58864822.23-P2	0.0588234	0.255598	0.325876
A1BG_-_58864840.23-P2	-0.0157165	0.404308	0.312058
A1CF_+_52645000.23-P1P2	-0.0493465	0.533765	0.356881
A1CF_+_52645080.23-P1P2	0.0338118	-0.498506	-0.336991
A1CF_+_52645339.23-P1P2	0.0238542	-0.240029	-0.143488
A1CF_-_52645011.23-P1P2	-0.0210107	-0.255251	-0.237545
A1CF_-_52645373.23-P1P2	0.0171178	-1.19807	-0.940077
A2ML1_+_8975211.23-P1P2	-0.257327	0.740468	0.147856
A2ML1_+_8975278.23-P1P2	0.0724319	-0.182625	-0.00814376
A2ML1_-_8975582.23-P1P2	0.0907071	0.096206	0.253369
A2ML1_-_8975593.23-P1P2	0.0548634	-0.83908	-0.57753
A2ML1_-_8975664.23-P1P2	0.0164827	-0.640652	-0.484881
A2M_+_9268141.23-P1P2	-0.0256616	0.351404	0.250659
A2M_+_9268487.23-P1P2	0.0444694	0.108703	0.179508
A2M_+_9268495.23-P1P2	-0.0132632	0.43852	0.344529
A2M_-_9268273.23-P1P2	-0.0677694	0.402972	0.216296
A2M_-_9268387.23-P1P2	0.00642945	-0.181751	-0.127467
A3GALT2_+_33786649.23-ENST00000442999.3	-0.0166595	-0.942668	-0.792415
A3GALT2_+_33786659.23-ENST00000442999.3	-0.00606407	-0.853098	-0.699815
A3GALT2_+_33786675.23-ENST00000442999.3
A3GALT2_+_33786682.23-ENST00000442999.3
A3GALT2_-_33786280.23-ENST00000442999.3	0.0452793	-1.17098	-0.869327
A4GALT_+_43116425.23-P1P2	-0.0100315	0.243673	0.190887
A4GALT_+_43116792.23-P1P2	0.110144	-0.337289	-0.0661799
A4GALT_-_43116431.23-P1P2	-0.00278114	-0.0306307	-0.0204969
A4GALT_-_43116434.23-P1P2	0.0667444	0.391927	0.451893
A4GALT_-_43116819.23-P1P2	-0.06957	-1.23169	-1.12526
A4GNT_+_137850968.23-P1P2	-0.594751		-1.02279
A4GNT_+_137851024.23-P1P2	-0.027973	-0.0367183	-0.071297
A4GNT_+_137851178.23-P1P2	0.078825	-1.15491
A4GNT_-_137851117.23-P1P2	0.0717957	0.214078	0.315476
A4GNT_-_137851121.23-P1P2	-0.0186016	-0.209393	-0.195621
AAAS_+_53714983.23-P1P2	0.0298873	-0.324557	-0.201718
AAAS_+_53715355.23-P1P2	-0.0761833	0.184199	0.0218865
AAAS_-_53715371.23-P1P2	0.0603537	-0.0730981	0.0595581
AAAS_-_53715389.23-P1P2	-0.111267	0.46696	0.189574
AAAS_-_53715438.23-P1P2	-0.0925939	0.430191	0.193432
AACS_+_125549983.23-P1P2	-0.0491219	-0.418691	-0.422478
AACS_+_125549999.23-P1P2	0.0520242	0.129529	0.210299
AACS_+_125550002.23-P1P2	-0.010241	0.0243926	0.010983
AACS_+_125550035.23-P1P2	-0.000382421	0.232584	0.199358
AACS_-_125550169.23-P1P2	-0.127397	-0.290919	-0.460231
AADACL2_+_151451732.23-P1P2	0.0603874	-0.67593	-0.433914
AADACL2_+_151451926.23-P1P2	-0.0443533	-0.240199	-0.267676
AADACL2_+_151452121.23-P1P2	-0.0989284	-0.0234471	-0.189478
AADACL2_-_151451828.23-P1P2	-0.0604345	-0.997894	-0.917241
AADACL2_-_151451961.23-P1P2	-0.263258	0.668127	0.0778422
AADACL3_+_12776115.23-P1P2	0.0225512	0.411073	0.387194
AADACL3_+_12776133.23-P1P2	-0.00533545	0.543502	0.444895
AADACL3_+_12776213.23-P1P2	0.0809222	0.23427	0.348605
AADACL3_+_12776313.23-P1P2	-0.0264937	-1.41833	-1.19933
AADACL3_+_12776495.23-P1P2	-0.0122064	-0.0349455	-0.041171
AADACL4_+_12704573.23-P1P2	0.0770342	0.0376516	0.180565
AADACL4_+_12704601.23-P1P2	-0.118456	0.316122	0.05301
AADACL4_+_12704653.23-P1P2	0.0497442	-0.0869832	0.0288952
AADACL4_+_12704714.23-P1P2	0.0444861	-0.403879	-0.240108
AADACL4_-_12704768.23-P1P2	-0.0570987	-0.136541	-0.205992
AADAC_+_151532013.23-P1P2	0.0256032	-0.0871524	-0.0151484
AADAC_+_151532371.23-P1P2	0.0127563	-0.303908	-0.215969
AADAC_-_151531905.23-P1P2	0.0198948	0.246462	0.247597
AADAC_-_151531939.23-P1P2	-0.0629842	0.0485853	-0.0651341
AADAC_-_151531954.23-P1P2	-0.0380478	0.152606	0.0653782
AADAT_+_171010904.23-P1P2	-0.0479909	0.0830123	-0.00968089
AADAT_+_171010929.23-P1P2	0.00429983	-0.0971783	-0.0621008
AADAT_+_171011392.23-P1P2	0.0428195	-0.0966353	0.0083993
AADAT_-_171011321.23-P1P2	-0.0898035	-0.156471	-0.281789
AADAT_-_171011368.23-P1P2	0.0255401	-0.77032	-0.574566
AAED1_+_99417117.23-P1P2	0.0117501	-0.639618	-0.492642
AAED1_+_99417233.23-P1P2
AAED1_+_99417525.23-P1P2	0.11127	-0.273356	-0.0117901
AAED1_+_99417589.23-P1P2	-0.104954	0.621658	0.327706
AAED1_-_99417574.23-P1P2	-0.0801175	-0.277754	-0.363466
AAGAB_+_67546965.23-P1P2	0.282462	-0.352494
AAGAB_-_67546714.23-P1P2	0.155715	-1.18755	-0.679398
AAGAB_-_67546928.23-P1P2
AAGAB_-_67546952.23-P1P2	-0.0173702	0.159592	0.108704
AAGAB_-_67546997.23-P1P2	0.0383055	-1.28293	-0.972606
AAK1_+_69870290.23-P1P2	0.00232532	0.337932	0.290529
AAK1_+_69870701.23-P1P2	-0.00645789	0.113412	0.0907426
AAK1_-_69870541.23-P1P2	-0.00505196	-0.431929	-0.353166
AAK1_-_69870791.23-P1P2	-0.0747384	0.264229	0.0900339
AAK1_-_69870794.23-P1P2	0.0188358	0.0488126	0.0838572
AAMDC_+_77532426.23-P1P2	-0.00785051	0.387673	0.312745
AAMDC_-_77532187.23-P1P2	0.0588856	-0.978312	-0.684203
AAMDC_-_77532222.23-P1P2	0.276283	-1.21496
AAMDC_-_77532236.23-P1P2	0.0590398	0.374244	0.423404
AAMDC_-_77532634.23-P1P2	0.15683	-0.521691	-0.13224
AAMP_+_219134841.23-P1P2	-0.179669	0.958723	0.467775
AAMP_+_219134851.23-P1P2	-0.122396	0.491275	0.18924
AAMP_-_219134415.23-P1P2	0.0872578	0.335968	0.443387
AAMP_-_219134424.23-P1P2	-0.00106162	-0.194141	-0.151234
AAMP_-_219134469.23-P1P2	0.0315744	-0.233509	-0.12411
AANAT_+_74463718.23-P1P2	-0.0175639	-1.16571	-0.976661
AANAT_+_74463735.23-P1P2	-0.0111304	-0.37765	-0.319784
AANAT_+_74464088.23-P1P2	0.132625	-0.0308057	0.225623
AANAT_-_74464175.23-P1P2	0.0635066	0.224971	0.309319
AANAT_-_74464185.23-P1P2	-0.157356	-1.07095	-1.15332
AAR2_+_34824386.23-P1P2	0.0161944	0.419335	0.382397
AAR2_+_34824488.23-P1P2	-0.0315448	-1.09154	-0.940077
AAR2_+_34824681.23-P1P2	-0.025699	-0.966854	-0.828656
AAR2_-_34824417.23-P1P2	0.0929088	-0.190281	0.022829
AAR2_-_34824425.23-P1P2	-0.265142		-1.2709
AARD_+_117950477.23-P1P2	0.0424231	-0.239293	-0.109114
AARD_+_117950489.23-P1P2	-0.0166595	0.225952	0.164325
AARD_+_117950882.23-P1P2	0.011243	-0.155839	-0.0974984
AARD_+_117950890.23-P1P2	0.0386366	-1.35754	-1.03278
AARD_-_117950494.23-P1P2	0.00222149	-0.496043	-0.392428
AARS2_+_44280650.23-P1P2	0.0297223	0.0112289	0.072887
AARS2_+_44281006.23-P1P2	-0.0408308	-0.00576404	-0.0693393
AARS2_+_44281027.23-P1P2	-0.226937	-1.07095	-1.27987
AARS2_+_44281044.23-P1P2	-0.0719989	0.0150296	-0.109001
AARS2_+_44281056.23-P1P2	-0.124205	0.0524834	-0.173285
AARSD1_+_41116203.23-P1	0.0145101	0.190678	0.192134
AARSD1_+_41116412.23-P1	0.0827803	0.284	0.392698
AARSD1_+_41116417.23-P1	0.0374252	-0.142703	-0.0391267
AARSD1_+_41132061.23-P2	0.063185	0.0203274	0.141194
AARSD1_+_41132078.23-P2	-0.0522728	-0.346406	-0.369029
AARSD1_-_41116243.23-P1	-0.0610994	0.0910322	-0.0269554
AARSD1_-_41116425.23-P1	0.0349294	0.0998223	0.154888
AARSD1_-_41131712.23-P2	-0.0775611	0.406492	0.20137
AARSD1_-_41132037.23-P2	-0.0707815	0.255045	0.0897114
AARSD1_-_41132088.23-P2	0.0530207	0.120914	0.205058
AARS_+_70323318.23-P1P2	-0.327804	-0.222285	-0.76852
AARS_+_70323322.23-P1P2	-0.217895	-0.27148	-0.608903
AARS_+_70323353.23-P1P2	-0.784834	1.31399	-0.341978
AARS_+_70323362.23-P1P2	-0.316553	0.0503107	-0.524886
AARS_-_70323332.23-P1P2	-0.0725224	-0.665863	-0.667394
AASDHPPT_+_105948405.23-P1P2	0.057151	-0.115454	0.0190575
AASDHPPT_+_105948450.23-P1P2	0.00257563	0.175965	0.158383
AASDHPPT_+_105948813.23-P1P2	0.0291088	-0.0728982	0.00289707
AASDHPPT_-_105948374.23-P1P2	0.0335416	-0.268168	-0.148907
AASDHPPT_-_105948417.23-P1P2	0.00955804	0.0475544	0.0659538
AASDH_+_57253570.23-P1P2	0.0264739	-0.362653	-0.239115
AASDH_-_57253280.23-P1P2	0.00859209	0.25159	0.23124
AASDH_-_57253356.23-P1P2	-0.0346051	0.369328	0.249068
AASDH_-_57253362.23-P1P2	0.0135571	0.238889	0.229871
AASDH_-_57253588.23-P1P2	0.0715194	-0.147742	0.0187552
AASS_+_121784000.23-P1P2	-0.118512	0.665388	0.338849
AASS_+_121784219.23-P1P2	-0.101004	0.113675	-0.0809922
AASS_+_121784247.23-P1P2	0.114802	-0.683066	-0.340792
AASS_-_121784277.23-P1P2	-0.0178379	0.266409	0.195303
AASS_-_121784328.23-P1P2	-0.284201	0.358468	-0.21376
AATF_-_35306286.23-P1P2	-0.544441		-0.931292
AATF_-_35306312.23-P1P2	-0.0721451	-0.0197518	-0.137742
AATF_-_35306333.23-P1P2	-0.0452756	-0.0491195	-0.112918
AATF_-_35306340.23-P1P2	-0.0442358	-0.443073	-0.433553
AATF_-_35306346.23-P1P2	-0.157247	-0.655348	-0.812873
AATK_+_79139571.23-ENST00000326724.4	-0.0184273	-0.544672	-0.469794
AATK_+_79139589.23-ENST00000326724.4	0.0208923	0.290586	0.285535
AATK_+_79139592.23-ENST00000326724.4	-0.0359902	-0.150746	-0.179231
AATK_-_79139586.23-ENST00000326724.4	-0.026926	0.145284	0.0796105
AATK_-_79139956.23-ENST00000326724.4	-0.0184744	-0.743018	-0.632263
ABAT_+_8768492.23-P1	-0.0457734	-0.0597863	-0.122556
ABAT_+_8768682.23-P1	0.0270221	0.524209	0.487948
ABAT_+_8807445.23-P2	-0.0317676	-0.256709	-0.258303
ABAT_+_8807450.23-P2	0.0827226	-0.387087	-0.15682
ABAT_+_8807464.23-P2	0.029852	0.140191	0.178703
ABAT_+_8807492.23-P2	-0.0823438	-1.26574	-1.17442
ABAT_+_8807696.23-P2	-0.0140448	0.0624128	0.0351919
ABAT_-_8768504.23-P1	0.0246685	0.0461483	0.0922839
ABAT_-_8768523.23-P1	-0.0944609	-0.176066	-0.306301
ABAT_-_8768533.23-P1	0.0193583	0.105938	0.131576
ABCA10_+_67224811.23-P1P2	0.0447853	0.0837177	0.159628
ABCA10_+_67224929.23-P1P2	-0.103696	0.424493	0.168576
ABCA10_-_67224447.23-P1P2	0.00543571	0.186071	0.171859
ABCA10_-_67224767.23-P1P2	-0.00974349	0.00534473	-0.00370643
ABCA10_-_67224823.23-P1P2	0.161753	0.085991	0.374217
ABCA12_+_216002996.23-P1P2	0.110314	-0.132715	0.101613
ABCA12_+_216003308.23-P1P2	0.0435623	0.0382021	0.12014
ABCA12_+_216003314.23-P1P2	-0.0237738	0.273365	0.190203
ABCA12_+_216003340.23-P1P2	0.0178476	0.287953	0.277843
ABCA12_-_216002923.23-P1P2	0.110268	-0.496608	-0.196387
ABCA13_+_48211090.23-P1P2	-0.0907405	-1.38527	-1.2895
ABCA13_+_48211097.23-P1P2	0.149986	0.0914587	0.357293
ABCA13_+_48211145.23-P1P2	-0.0539753	-0.761754	-0.712168
ABCA13_+_48211160.23-P1P2	-0.0391502	0.328578	0.20744
ABCA13_-_48211093.23-P1P2	0.0491936	0.199021	0.262043
ABCA1_-_107689997.23-P1P2	-0.00994917	-0.812043	-0.673269
ABCA1_-_107690031.23-P1P2	-0.0545809	0.000621101	-0.089119
ABCA1_-_107690385.23-P1P2	-0.664789		-0.352972
ABCA1_-_107690389.23-P1P2	-0.0536105	0.0777411	-0.0242167
ABCA1_-_107690394.23-P1P2	0.0812015	0.0408007	0.190722
ABCA2_+_139922190.23-P1P2	-0.0353105	0.379789	0.256349
ABCA2_+_139922201.23-P1P2	-0.0802366	0.276689	0.0902359
ABCA2_+_139922272.23-P1P2	0.0087929	0.0148017	0.0377479
ABCA2_+_139922669.23-P1P2	-0.0168072	0.209798	0.150831
ABCA2_-_139922596.23-P1P2	-0.0517064	0.119558	0.0134817
ABCA3_+_2390336.23-P1P2	0.070631	-0.608315	-0.359928
ABCA3_+_2390611.23-P1P2	-0.0176237	-0.142488	-0.139067
ABCA3_-_2390323.23-P1P2	-0.0114959	0.198577	0.151304
ABCA3_-_2390333.23-P1P2	0.047279	-0.147502	-0.0251343
ABCA3_-_2390704.23-P1P2	-0.214803	0.158462	-0.25129
ABCA4_+_94586668.23-P1P2	0.0196274	-1.1937	-0.933072
ABCA4_-_94586219.23-P1P2	-0.124461	-0.53003	-0.650649
ABCA4_-_94586232.23-P1P2	0.0917483	-0.123784	0.0751594
ABCA4_-_94586250.23-P1P2	0.0125449	0.608659	0.530758
ABCA4_-_94586658.23-P1P2	-0.0734725	0.136693	-0.012076
ABCA5_-_67322851.23-P1P2	0.0834634	-0.251826	-0.0447354
ABCA5_-_67322872.23-P1P2	-0.0182045	-0.649284	-0.555033
ABCA5_-_67322891.23-P1P2	-0.0212849	-0.633812	-0.547969
ABCA5_-_67323220.23-P1P2	0.0506753	-0.492302	-0.301243
ABCA5_-_67323280.23-P1P2	0.100718	-0.252833	-0.014178
ABCA6_+_67137842.23-P1P2	0.0165077	-0.172947	-0.10193
ABCA6_+_67138008.23-P1P2	-0.0837376	-1.29391	-1.20196
ABCA6_+_67138026.23-P1P2	0.0567949	0.107128	0.200635
ABCA6_+_67138050.23-P1P2	0.159563	-0.0663157	0.245541
ABCA6_-_67137854.23-P1P2	-0.0503225	-0.0672027	-0.136901
ABCA7_+_1040413.23-P1	0.0992455	-0.375618	-0.11738
ABCA7_+_1040513.23-P1	0.023378	-0.373856	-0.253917
ABCA7_+_1040577.23-P1	-0.000483248	-0.600502	-0.482867
ABCA7_+_1041292.23-P2	0.0338404	-0.762063	-0.552711
ABCA7_+_1041297.23-P2	-0.0691439	0.410881	0.220272
ABCA7_+_1041311.23-P2	0.00572541	0.213377	0.194741
ABCA7_-_1040133.23-P1	-0.17963	0.532367	0.118791
ABCA7_-_1040209.23-P1	0.0092882	-0.184778	-0.124745
ABCA7_-_1041459.23-P2	-0.0633806	-0.104433	-0.19113
ABCA7_-_1041717.23-P2	0.0770734	0.236061	0.343072
ABCA8_+_66950959.23-P1P2	-0.0345876	-0.275026	-0.278428
ABCA8_+_66951401.23-P1P2	-0.0176237	0.0645651	0.0304452
ABCA8_-_66951372.23-P1P2	0.0634473	-0.0500931	0.0840185
ABCA8_-_66951525.23-P1P2	-0.0207202	-0.163917	-0.162243
ABCA8_-_66951528.23-P1P2	0.00766919	0.0511542	0.0654657
ABCA9_+_67057085.23-P1P2	0.0112797	0.343931	0.311726
ABCA9_-_67056649.23-P1P2	-0.125433	-1.50275	-1.44748
ABCA9_-_67057012.23-P1P2	-0.00730485	-0.404887	-0.335125
ABCA9_-_67057053.23-P1P2	0.0454608	-0.0107101	0.0835492
ABCA9_-_67057069.23-P1P2	-0.245248	0.847743	0.257647
ABCB10_+_229694285.23-P1P2	-0.666523		-1.15017
ABCB10_+_229694413.23-P1P2	-0.0157025	0.397345	0.306383
ABCB10_-_229694297.23-P1P2	-0.69612	1.70614	0.141163
ABCB10_-_229694457.23-P1P2	0.074372	-0.223435	-0.0380263
ABCB10_-_229694467.23-P1P2	0.0429183	-0.206541	-0.0814003
ABCB11_+_169887409.23-P1P2	0.034154	0.0336274	0.0992843
ABCB11_+_169887811.23-P1P2	-0.0201171	-0.0958249	-0.1054
ABCB11_-_169887416.23-P1P2	0.0985191	-0.618853	-0.317835
ABCB11_-_169887784.23-P1P2	-0.0223854	-0.311444	-0.286051
ABCB11_-_169887796.23-P1P2	-0.00465194	0.0570068	0.0478488
ABCB1_-_87342256.23-ENST00000265724.3	0.0872478	0.299133	0.413213
ABCB1_-_87342302.23-ENST00000265724.3	0.0415938	-0.25521	-0.123654
ABCB1_-_87342654.23-ENST00000265724.3	-0.020529	0.2599	0.18508
ABCB1_-_87342657.23-ENST00000265724.3	-0.127298	0.32725	0.046039
ABCB1_-_87342674.23-ENST00000265724.3	-0.0656077	0.129015	-0.0040585
ABCB4_+_87104933.23-P1P2	0.00146409	-0.0582718	-0.0354056
ABCB4_+_87104939.23-P1P2	0.0270221	0.191324	0.215418
ABCB4_+_87105008.23-P1P2	-0.0384778	0.289199	0.176424
ABCB4_-_87104608.23-P1P2	-0.0678781	0.272951	0.109652
ABCB4_-_87104975.23-P1P2	-0.0053792	0.435878	0.356705
ABCB5_+_20687051.23-P1P2	0.066682	-1.22841	-0.878169
ABCB5_+_20687218.23-P1P2		0.581362	0.558203
ABCB5_+_20687242.23-P1P2	-0.0403213	-0.103789	-0.148665
ABCB5_+_20687409.23-P1P2
ABCB5_-_20687396.23-P1P2	0.129329	-0.134088	0.135072
ABCB6_+_220083500.23-P1P2	0.0105553	0.18122	0.177198
ABCB6_-_220083181.23-P1P2	0.0435138	0.523287	0.517187
ABCB6_-_220083194.23-P1P2	0.0402168	-0.592961	-0.402672
ABCB6_-_220083468.23-P1P2	0.020537	0.1564	0.175032
ABCB6_-_220083604.23-P1P2	0.0257535	-0.120565	-0.0422296
ABCB7_+_74375885.23-P1P2	-0.196286	-1.27157	-1.38492
ABCB7_+_74376070.23-P1P2	-0.250117	-0.00766027	-0.451519
ABCB7_-_74375964.23-P1P2	0.0384333	-1.61562	-1.24316
ABCB7_-_74376019.23-P1P2	-0.122642	-0.164174	-0.347817
ABCB7_-_74376044.23-P1P2	-0.0460653	-0.491944	-0.47689
ABCB8_+_150725965.23-P1P2	0.00784671	0.122646	0.124318
ABCB8_-_150725551.23-P1P2	-0.186844	-1.02545	-1.16257
ABCB8_-_150725580.23-P1P2	-0.00229276	0.186602	0.158238
ABCB8_-_150725928.23-P1P2	-0.145257	0.235803	-0.06149
ABCB8_-_150725975.23-P1P2	0.0316393	-0.00040729	0.066847
ABCB9_+_123450546.23-P1	0.0270221	0.302398	0.306354
ABCB9_+_123450566.23-P1	0.0770112	0.178332	0.295697
ABCB9_+_123450826.23-P1	-0.000884687	-0.317324	-0.251761
ABCB9_+_123450970.23-P1	0.0252889	-0.453286	-0.31547
ABCB9_+_123465727.23-P2	0.102809	-1.42565	-0.970555
ABCB9_-_123450999.23-P1	-0.0512542	-0.168167	-0.221254
ABCB9_-_123465422.23-P2	-0.00360815	0.247836	0.205977
ABCB9_-_123465699.23-P2	0.0435585	0.206581	0.257984
ABCB9_-_123465738.23-P2	0.11056	-1.83361	-1.29044
ABCB9_-_123465787.23-P2	-0.0627422	-0.0459182	-0.142063
ABCC10_+_43395315.23-P1P2	0.088547	0.358204	0.463936
ABCC10_-_43395330.23-P1P2
ABCC10_-_43395343.23-P1P2	-0.0532821	0.0927826	-0.0113051
ABCC10_-_43395891.23-P1P2
ABCC10_-_43395984.23-P1P2	-0.00866541	-0.025983	-0.0273935
ABCC11_+_48278130.23-P1	0.232572	-1.01302
ABCC11_+_48281001.23-P2	0.0875111	-0.279088	-0.0596934
ABCC11_+_48281042.23-P2	0.00624212	0.14976	0.143598
ABCC11_+_48281345.23-P2	0.0838094	-1.1937
ABCC11_+_48281428.23-P2	0.0377728	-0.160416	-0.052996
ABCC11_-_48277852.23-P1	0.00126777	0.128988	0.117545
ABCC11_-_48278103.23-P1	-0.0213635	0.179055	0.117376
ABCC11_-_48278122.23-P1	-0.0764267	-0.153815	-0.255285
ABCC11_-_48278125.23-P1	0.0178476	0.639634	0.565761
ABCC11_-_48280980.23-P2	0.0782444	-0.526581	-0.279167
ABCC12_+_48180636.23-ENST00000311303.3	-0.0534893	0.227386	0.0985164
ABCC12_-_48180314.23-ENST00000311303.3	0.0593552	0.0807649	0.183709
ABCC12_-_48180643.23-ENST00000311303.3	0.0181103	0.350687	0.32968
ABCC12_-_48180648.23-ENST00000311303.3	0.0483362	-0.719957	-0.491876
ABCC12_-_48180679.23-ENST00000311303.3	0.1018	-0.212438	0.02086
ABCC1_+_16043482.23-P1P2	-0.126089	0.445397	0.144964
ABCC1_+_16043921.23-P1P2	0.0540554	-0.259719	-0.104681
ABCC1_-_16043871.23-P1P2	0.0814114	-0.117392	0.0615926
ABCC1_-_16043934.23-P1P2	-0.00606407	0.0399712	0.0313337
ABCC1_-_16044002.23-P1P2	0.0510209	-0.0703281	0.0448525
ABCC2_+_101542515.23-P1P2	-0.0597077	-0.784705	-0.741383
ABCC2_+_101542910.23-P1P2	0.205143	-0.939164	-0.386156
ABCC2_+_101542914.23-P1P2	-0.0410153	-0.110905	-0.155753
ABCC2_+_101542981.23-P1P2	0.147618	-1.73815	-1.14698
ABCC2_-_101542808.23-P1P2	-0.00905958	-1.22841	-1.01242
ABCC3_+_48712248.23-P1P2	0.0594934	-0.268754	-0.102188
ABCC3_+_48712270.23-P1P2	-0.0949942	0.149105	-0.0410554
ABCC3_+_48712450.23-P1P2	-0.0548595	-0.91705	-0.840915
ABCC3_+_48712559.23-P1P2	-0.0327406	-0.491235	-0.452076
ABCC3_+_48712662.23-P1P2	-0.00745631	0.208878	0.167085
ABCC4_+_95953430.23-P1P2	0.00996041	0.297175	0.271048
ABCC4_+_95953641.23-P1P2	0.0405305	0.218635	0.262345
ABCC4_+_95953668.23-P1P2	-0.00268127	0.262038	0.21929
ABCC4_-_95953614.23-P1P2	-0.0825641	0.183209	0.00947145
ABCC4_-_95953652.23-P1P2	0.0438256	-0.0460121	0.0516739
ABCC5_+_183735648.23-P1P2	-0.146488	0.27533	-0.0313676
ABCC5_+_183735692.23-P1P2	-0.000223244	-0.604237	-0.485452
ABCC5_-_183735259.23-P1P2	0.0506369	-0.155914	-0.025914
ABCC5_-_183735312.23-P1P2	0.0082451	0.0807369	0.0907322
ABCC5_-_183735467.23-P1P2	-0.0291146	-0.433765	-0.398432
ABCC6_+_16316916.23-ENST00000205557.7
ABCC6_+_16317287.23-ENST00000205557.7	0.132289	-0.409923	-0.0853695
ABCC6_+_16317296.23-ENST00000205557.7	-0.0868867	-0.399513	-0.47546
ABCC6_-_16317235.23-ENST00000205557.7	0.0176469	-0.330527	-0.228867
ABCC6_-_16317247.23-ENST00000205557.7	0.00983753	0.363069	0.324771
ABCC8_+_17497953.23-P1P2	0.00193821	0.0829842	0.0811017
ABCC8_+_17498387.23-P1P2	-0.00243863	-0.12498	-0.0971173
ABCC8_-_17497979.23-P1P2	-0.0297329	0.265503	0.172928
ABCC8_-_17497997.23-P1P2	-0.1211	-1.28293	-1.25845
ABCC8_-_17498220.23-P1P2	0.0526159	0.29403	0.346051
ABCC9_+_22093672.23-P1P2	0.0503816	0.256148	0.310973
ABCC9_+_22093678.23-P1P2	0.00274681	0.350787	0.30182
ABCC9_+_22093937.23-P1P2	0.0296008	0.273348	0.28726
ABCC9_+_22093941.23-P1P2	0.0376175	0.520155	0.503899
ABCC9_+_22094309.23-P1P2	-0.119642	-0.722108	-0.799138
ABCD1_+_152990414.23-P1P2	0.00658325	-0.148076	-0.0996176
ABCD1_+_152990711.23-P1P2	0.0290694	0.339824	0.340718
ABCD1_-_152990338.23-P1P2	0.0670376	0.249782	0.336053
ABCD1_-_152990379.23-P1P2	-0.106428	-0.106935	-0.271468
ABCD1_-_152990703.23-P1P2	0.000653272	0.219413	0.190458
ABCD2_+_40013099.23-P1P2	0.0211154	0.0074708	0.054157
ABCD2_+_40013514.23-P1P2	0.0451715	0.227009	0.277642
ABCD2_+_40013594.23-P1P2	0.024519	-0.0226348	0.0356998
ABCD2_-_40013191.23-P1P2	0.0413748	0.339229	0.36261
ABCD2_-_40013610.23-P1P2	-0.187932	0.0872316	-0.260735
ABCD3_+_94884002.23-P1P2	-0.0236109	0.00632068	-0.0281279
ABCD3_+_94884009.23-P1P2	-0.0191831	0.324823	0.24068
ABCD3_+_94884032.23-P1P2	-0.00308859	-0.161687	-0.128351
ABCD3_+_94884473.23-P1P2	0.0912856	-0.00527237	0.171342
ABCD3_-_94883974.23-P1P2	-0.0314886	0.513191	0.372515
ABCD4_+_74769611.23-P1P2	0.0310297	0.247842	0.268978
ABCD4_+_74769649.23-P1P2	-0.00443766	-0.743127	-0.606824
ABCD4_-_74769631.23-P1P2	0.0979095	-0.481308	-0.206337
ABCD4_-_74769682.23-P1P2	-0.0399951	-1.03743	-0.912432
ABCD4_-_74769729.23-P1P2	0.00981568	0.444389	0.391308
ABCE1_+_146019317.23-P1P2	-0.26912	0.388482	-0.161761
ABCE1_+_146019463.23-P1P2	-0.140652	0.441147	0.114998
ABCE1_+_146019842.23-P1P2	-0.135292	-1.31483	-1.31043
ABCE1_-_146019502.23-P1P2	-0.838339		-1.4658
ABCE1_-_146019516.23-P1P2	-0.576937		-0.990392
ABCF1_+_30539238.23-P1	-0.1421	-1.40124	-1.39599
ABCF1_+_30539469.23-P1	0.0177337	0.104127	0.127138
ABCF1_+_30539647.23-P1	0.0188725	0.372984	0.349321
ABCF1_+_30546312.23-P2	-0.0380873	0.0856023	0.0104511
ABCF1_+_30546315.23-P2	0.0370027	-0.0608769	0.0270953
ABCF1_-_30539232.23-P1	0.0459433	0.0393688	0.125426
ABCF1_-_30539602.23-P1	-0.0748385	-0.881268	-0.847956
ABCF1_-_30546344.23-P2	0.0595072	-0.38365	-0.196228
ABCF1_-_30546354.23-P2	0.0787336	-0.0204711	0.136071
ABCF1_-_30546366.23-P2	-0.020196	-0.125453	-0.129799
ABCF2_+_150923872.23-P1P2	-0.0908445	-0.0212931	-0.173012
ABCF2_+_150923902.23-P1P2	-0.0806607	-1.2476	-1.15644
ABCF2_+_150924236.23-P1P2	0.12167	-0.0586668	0.182889
ABCF2_+_150924287.23-P1P2	-0.0670795	0.0384864	-0.08085
ABCF2_-_150923882.23-P1P2	0.0716793	0.154191	0.266235
ABCF3_-_183903980.23-P1P2	-0.038176	0.361456	0.236129
ABCF3_-_183903991.23-P1P2	0.060138	0.105272	0.205196
ABCF3_-_183904021.23-P1P2	-0.0491092	-0.469977	-0.464442
ABCF3_-_183904356.23-P1P2	-0.0411737	0.252631	0.141583
ABCF3_-_183904380.23-P1P2	-0.00944365	0.0355148	0.0215388
ABCG1_+_43639544.23-P1P2	-0.0669829	0.117216	-0.0162188
ABCG1_+_43639681.23-P1P2	0.098756	0.0219117	0.207184
ABCG1_-_43639282.23-P1P2	-0.0521851	-0.144849	-0.203857
ABCG1_-_43639541.23-P1P2	0.0195084	-0.0249725	0.0246734
ABCG1_-_43639626.23-P1P2	0.035433	-0.133269	-0.0350264
ABCG2_+_89079974.23-P1P2	0.124376	-0.772664	-0.396733
ABCG2_+_89080025.23-P1P2	-0.0320031	0.153688	0.0772575
ABCG2_+_89080044.23-P1P2	0.207892	-1.53803	-0.878169
ABCG2_-_89079989.23-P1P2	-0.0885885	0.083149	-0.0834036
ABCG2_-_89080000.23-P1P2
ABCG4_+_119019794.23-P1P2	-0.0141537	0.251864	0.190096
ABCG4_+_119019855.23-P1P2	0.00902754	-0.178967	-0.120462
ABCG4_-_119019784.23-P1P2	0.0106604	-0.332061	-0.242829
ABCG4_-_119019798.23-P1P2
ABCG4_-_119019811.23-P1P2	0.38232	-1.59463
ABCG5_+_44065447.23-P1P2	-0.0930206	-0.268194	-0.379106
ABCG5_+_44065865.23-P1P2	-0.0134179	-0.692751	-0.581915
ABCG5_-_44065428.23-P1P2	-0.179298	0.546908	0.1313
ABCG5_-_44065433.23-P1P2	-0.0200478	0.555962	0.428339
ABCG5_-_44065840.23-P1P2	0.196077	-1.1863
ABCG8_+_44066166.23-P1P2	0.0785323	-0.124423	0.0506005
ABCG8_+_44066180.23-P1P2	0.118994	-1.41085	-0.933072
ABCG8_+_44066323.23-P1P2	0.0507233	-1.41461	-1.05624
ABCG8_+_44066333.23-P1P2	-0.168958	-0.21215	-0.47133
ABCG8_-_44066172.23-P1P2	-0.0302928	0.0601438	0.00378429
ABHD10_+_111697851.23-P1P2	0.00326434	0.00684911	0.0211824
ABHD10_+_111698093.23-P1P2	0.0630256	-0.179012	-0.0222928
ABHD10_+_111698316.23-P1P2	0.0351173	-0.0508638	0.0318641
ABHD10_-_111697877.23-P1P2	0.05828	-0.247265	-0.0868022
ABHD10_-_111697914.23-P1P2	0.0144026	-0.304842	-0.213739
ABHD11_+_73152656.23-P1P2	0.0350688	0.185803	0.225533
ABHD11_+_73152963.23-P1P2	0.0616229	-0.115116	0.027467
ABHD11_-_73152688.23-P1P2	-0.0286451	-0.780455	-0.681411
ABHD11_-_73153094.23-P1P2	0.0252673	-0.52228	-0.371994
ABHD11_-_73153135.23-P1P2	0.0495592	0.17876	0.246121
ABHD12B_+_51339177.23-P1P2	-0.0574956	0.0680811	-0.0391911
ABHD12B_-_51338832.23-P1P2	-0.0179322	-1.22175	-1.02279
ABHD12B_-_51338864.23-P1P2	-0.00350021	-1.64105	-1.34024
ABHD12B_-_51338885.23-P1P2	-0.0235281	0.361054	0.26244
ABHD12B_-_51339227.23-P1P2	0.117195	0.837417	0.908365
ABHD12_+_25371393.23-P1P2	0.0607455	-0.0523028	0.0772958
ABHD12_+_25371436.23-P1P2	-0.0470458	-0.562501	-0.536438
ABHD12_-_25371053.23-P1P2	-0.104499	-1.24133	-1.19668
ABHD12_-_25371057.23-P1P2	-0.106765	0.450244	0.184076
ABHD12_-_25371489.23-P1P2	-0.147221		-1.04241
ABHD13_+_108870795.23-P1P2	-0.00710825	-0.115568	-0.0979042
ABHD13_+_108870811.23-P1P2	0.00978863	-0.172806	-0.114034
ABHD13_+_108871228.23-P1P2	-0.0123081	0.0688812	0.0436462
ABHD13_-_108870880.23-P1P2	-0.0812808	0.268049	0.0812629
ABHD13_-_108871256.23-P1P2	0.0201312	0.17962	0.193305
ABHD14A_+_52009149.23-P1P2	-0.00336198	0.197394	0.165128
ABHD14A_+_52009194.23-P1P2	0.0177975	-1.12923	-0.882484
ABHD14A_+_52009255.23-P1P2	-0.0246224	0.239414	0.160864
ABHD14A_-_52009122.23-P1P2	-0.0215231	-0.00575259	-0.0342153
ABHD14A_-_52009160.23-P1P2	0.0700888	0.00891273	0.144405
ABHD14B_+_52007815.23-P1	0.00856819	-0.0481246	-0.014178
ABHD14B_+_52016945.23-P2	0.0594477	0.0086647	0.124849
ABHD14B_+_52017325.23-P2	-0.0389863	0.26095	0.152372
ABHD14B_+_52017350.23-P2	0.0454823	-0.0470446	0.0538416
ABHD14B_-_52007985.23-P1	0.0727831	0.257123	0.352513
ABHD14B_-_52007995.23-P1	0.0418332	-0.300518	-0.160311
ABHD14B_-_52008027.23-P1	0.00093536	0.242704	0.210039
ABHD14B_-_52008040.23-P1	0.0680274	0.368368	0.434939
ABHD14B_-_52016965.23-P2	0.00399218	-0.293718	-0.223566
ABHD14B_-_52017383.23-P2	0.0128498	-0.330559	-0.237618
ABHD15_-_27893577.23-P1P2	0.0143062	0.0440732	0.0717392
ABHD15_-_27893641.23-P1P2	-0.615595		-1.0607
ABHD15_-_27893654.23-P1P2	-0.00304825	0.296102	0.246511
ABHD15_-_27893980.23-P1P2	-0.104831	-0.0450239	-0.217878
ABHD15_-_27894008.23-P1P2	-0.141695	0.393579	0.0741588
ABHD16A_+_31671120.23-P1P2	-0.0378164	0.172373	0.0819826
ABHD16A_+_31671138.23-P1P2	-0.124461	0.288454	0.019437
ABHD16A_-_31670671.23-P1P2	-0.00606407	0.0924974	0.0743364
ABHD16A_-_31670679.23-P1P2	0.12167	-0.585477	-0.248406
ABHD16A_-_31670764.23-P1P2	0.0488523	0.323242	0.363121
ABHD16B_+_62492825.23-P1P2	0.06497	-0.00548172	0.123311
ABHD16B_+_62492837.23-P1P2	-0.00188709	-0.53003	-0.427725
ABHD16B_+_62492887.23-P1P2	0.206077	-1.20803
ABHD16B_+_62493236.23-P1P2	0.0259197	-0.0313524	0.0311102
ABHD16B_-_62492870.23-P1P2	-0.0355156	-0.298779	-0.299561
ABHD17A_+_1885470.23-P1P2	0.0744281	-0.396477	-0.179593
ABHD17A_-_1885045.23-P1P2	-0.0347973	0.395038	0.269767
ABHD17A_-_1885076.23-P1P2	-0.0169714	-0.231759	-0.210967
ABHD17A_-_1885099.23-P1P2	-0.0406675	0.553673	0.388964
ABHD17A_-_1885483.23-P1P2	-0.0192108	0.505109	0.388228
ABHD17B_+_74525655.23-P1P2	0.0064735	-0.557882	-0.435322
ABHD17B_+_74525862.23-P1P2	-0.0498386	0.186975	0.0720718
ABHD17B_+_74526089.23-P1P2	-0.079085	-1.1937	-1.10913
ABHD17B_-_74525690.23-P1P2	0.0189381	-0.201611	-0.120976
ABHD17B_-_74525704.23-P1P2	0.0186615	-0.0782891	-0.0205169
ABHD17C_+_80987662.23-P1P2	0.0611739	-0.168167	-0.016782
ABHD17C_+_80987703.23-P1P2	-0.133316	-0.0262744	-0.254333
ABHD17C_+_80987878.23-P1P2	-0.0313632	-0.648609	-0.578412
ABHD17C_+_80987887.23-P1P2	0.0180331	-0.564734	-0.419908
ABHD17C_+_80988086.23-P1P2
ABHD1_+_27347075.23-P1P2	-0.09651	0.120781	-0.0670015
ABHD1_+_27347086.23-P1P2	0.03779	-0.520619	-0.347859
ABHD1_+_27347095.23-P1P2	0.0554509	-0.0297641	0.0861188
ABHD1_+_27347132.23-P1P2	0.000626068	0.267455	0.22974
ABHD1_-_27346733.23-P1P2	0.00159042	-0.48193	-0.382021
ABHD2_+_89631693.23-P1P2	0.0580247	-0.631062	-0.401478
ABHD2_+_89632075.23-P1P2	0.005617	0.181841	0.168726
ABHD2_-_89631738.23-P1P2	-0.0573592	0.0955058	-0.0164907
ABHD2_-_89631760.23-P1P2	0.0909773	-1.79586	-1.29604
ABHD2_-_89632154.23-P1P2	-0.00424475	0.536891	0.441467
ABHD3_+_19284354.23-P1P2	-0.0636489	0.356323	0.185599
ABHD3_+_19284534.23-P1P2	-0.0454606	-1.27444	-1.11642
ABHD3_+_19284717.23-P1P2	-0.116615	0.324423	0.0631529
ABHD3_+_19284728.23-P1P2	0.10561	0.0454295	0.238903
ABHD3_-_19284770.23-P1P2	-0.218848	0.288454	-0.152224
ABHD4_+_23067515.23-P1P2	0.00181068	-0.0573387	-0.0340114
ABHD4_+_23067613.23-P1P2	0.0364482	0.481796	0.470368
ABHD4_-_23067199.23-P1P2	0.0605663	0.0719721	0.178713
ABHD4_-_23067625.23-P1P2	-0.0128824	0.270538	0.207696
ABHD4_-_23067680.23-P1P2	-0.0762507	-0.155135	-0.256046
ABHD5_+_43732395.23-P1P2	0.0578094	-0.185062	-0.0367329
ABHD5_+_43732521.23-P1P2	-0.0157225	-0.115587	-0.113586
ABHD5_+_43732806.23-P1P2	0.0355861	0.0201696	0.0908712
ABHD5_-_43732422.23-P1P2	0.0644284	-0.437506	-0.231369
ABHD5_-_43732464.23-P1P2	0.0018988	0.00266358	0.0152723
ABHD6_+_58223718.23-P1P2	0.0296525	0.106135	0.150459
ABHD6_+_58223966.23-P1P2	0.10196	0.105556	0.28149
ABHD6_-_58223553.23-P1P2	0.0425231	-0.205754	-0.0814741
ABHD6_-_58223594.23-P1P2	0.000738632	0.495408	0.416568
ABHD6_-_58223914.23-P1P2	-0.0576221	0.0468336	-0.0568163
ABHD8_+_17413753.23-P1P2	0.103075	-0.0318573	0.171019
ABHD8_-_17413788.23-P1P2	0.0695356	-0.48747	-0.262986
ABHD8_-_17414169.23-P1P2	0.0304007	0.084143	0.133815
ABHD8_-_17414173.23-P1P2	0.0475255	0.187923	0.249923
ABHD8_-_17414201.23-P1P2	0.145149	0.224189	0.457162
ABI1_+_27149446.23-P1P2	0.0120089	0.0260393	0.0527969
ABI1_+_27149474.23-P1P2	0.00304116	0.0195362	0.0311633
ABI1_+_27149800.23-P1P2	-0.000827565	-0.0384457	-0.023342
ABI1_-_27149837.23-P1P2	-0.0757529	0.475213	0.26092
ABI1_-_27149855.23-P1P2	0.0389814	0.19491	0.240105
ABI2_+_204193030.23-P1P2	-0.0147652	0.11298	0.0752808
ABI2_+_204193079.23-P1P2	-0.0760356	0.111277	-0.0375451
ABI2_+_204193458.23-P1P2	0.00165448	0.00180432	0.0141244
ABI2_-_204193058.23-P1P2	-0.0967776	0.384496	0.148413
ABI2_-_204193288.23-P1P2	-0.0814721	0.334972	0.135704
ABI3BP_+_100712238.23-P1P2	0.0105116	-0.262924	-0.186498
ABI3BP_+_100712307.23-P1P2	-0.279395	0.713682	0.0857903
ABI3BP_-_100712220.23-P1P2	0.0121145	-0.143757
ABI3BP_-_100712267.23-P1P2	-0.21604	-0.367817	-0.684401
ABI3BP_-_100712320.23-P1P2	0.0907247	-0.276782	-0.0519603
ABI3_+_47287798.23-P1P2	-0.0188419	-0.793045	-0.673888
ABI3_+_47288122.23-P1P2	0.0787082	-0.342186	-0.12736
ABI3_+_47288159.23-P1P2	0.120003	-0.565218	-0.234852
ABI3_+_47288524.23-P1P2	-0.000605555	0.0480179	0.0478488
ABI3_-_47288028.23-P1P2	0.132978	-0.552533	-0.20087
ABL1_+_133589617.23-ENST00000372348.2	-0.00606407	0.0965543	0.0776578
ABL1_+_133589629.23-ENST00000372348.2	0.0509848	-1.13657	-0.828133
ABL1_+_133589636.23-ENST00000372348.2	0.0640857	0.204474	0.293591
ABL1_-_133589228.23-ENST00000372348.2	-0.0271506	-0.0327948	-0.0665892
ABL1_-_133589268.23-ENST00000372348.2	-0.00606407	0.381999	0.311349
ABL2_+_179112168.23-P1	-0.0377609	-0.288342	-0.2951
ABL2_+_179112186.23-P1	0.0496101	-0.417163	-0.241664
ABL2_+_179198340.23-P2	0.0118527	-0.0102463	0.0228061
ABL2_+_179198398.23-P2	-0.0203665	0.27134	0.194741
ABL2_+_179198565.23-P2	0.103846	0.0897236	0.271957
ABL2_+_179198740.23-P2	-0.0312734	-0.0105067	-0.0558401
ABL2_-_179112151.23-P1	-0.00197352	-0.161512	-0.12618
ABL2_-_179112154.23-P1
ABL2_-_179112158.23-P1	0.00499245	0.32306	0.283204
ABL2_-_179198834.23-P2	-0.0617306	0.0601438	-0.0533914
ABLIM1_+_116417743.23-ENST00000277895.5	0.0141942	0.0436986	0.0712289
ABLIM1_+_116417829.23-ENST00000277895.5	-0.0272331	0.0276069	-0.0172888
ABLIM1_+_116418018.23-ENST00000277895.5	-0.0850645	0.136074	-0.033665
ABLIM1_-_116417795.23-ENST00000277895.5	0.0132944	0.294826	0.275188
ABLIM1_-_116417810.23-ENST00000277895.5	-0.059828	0.24216	0.0990839
ABLIM2_+_8160016.23-P1P2	0.0206975	0.209751	0.219002
ABLIM2_+_8160141.23-P1P2	0.0189219	-0.90446	-0.696423
ABLIM2_+_8160204.23-P1P2	-0.0456622	0.21327	0.101195
ABLIM2_+_8160523.23-P1P2	-0.0363259	-0.79098	-0.703996
ABLIM2_-_8160138.23-P1P2	-0.0592611	-1.43982	-1.27691
ABLIM3_+_148521102.23-P1P2	-0.000571853	0.106613	0.0958811
ABLIM3_+_148521451.23-P1P2	-0.0592611	-0.0155299	-0.110854
ABLIM3_-_148521229.23-P1P2	-0.00884862	0.224475	0.177321
ABLIM3_-_148521482.23-P1P2	-0.0459296	0.306947	0.177401
ABLIM3_-_148521503.23-P1P2	-0.0114369	0.364617	0.287347
ABO_+_136150190.23-P1	0.0514915	0.245564	0.304327
ABO_+_136150601.23-P1	-0.0740187	-0.133901	-0.234602
ABO_-_136130692.23-P2	0.0431898	-0.869278	-0.623483
ABO_-_136130921.23-P2	0.00157399	-0.0659153	-0.0414634
ABO_-_136130955.23-P2	0.165403	-1.78143	-1.15017
ABO_-_136130959.23-P2	0.0602843	-0.00158173	0.117982
ABO_-_136130966.23-P2	-0.000293968	-0.186255	-0.143382
ABO_-_136150219.23-P1	0.00124664	0.370225	0.315006
ABO_-_136150600.23-P1	-0.0438713	-0.0290104	-0.0939007
ABO_-_136150606.23-P1	0.0169383	-0.703516	-0.535519
ABRACL_+_139349876.23-P1P2	-0.0140476	-0.0685398	-0.0720228
ABRACL_+_139349879.23-P1P2	-0.0952264	-0.185976	-0.315806
ABRACL_+_139349931.23-P1P2	0.0301959	-0.265658	-0.152936
ABRACL_+_139350209.23-P1P2	-0.059657	-0.468405	-0.482338
ABRACL_-_139350119.23-P1P2	-0.0243361	-0.360695	-0.32992
ABRA_+_107782019.23-P1P2	0.064542	-0.558822	-0.330483
ABRA_+_107782392.23-P1P2	0.0172623	0.193697	0.199611
ABRA_+_107782399.23-P1P2	-0.00154493	0.311714	0.262027
ABRA_+_107782422.23-P1P2	-0.0188726	0.483114	0.370836
ABRA_-_107782350.23-P1P2	0.0697469	0.218063	0.315013
ABR_+_1082842.23-P1P2	0.0152494	0.0313585	0.0630451
ABR_+_1082862.23-P1P2	0.116372	0.127998	0.326073
ABR_+_1083266.23-P1P2	-0.154768	-0.53003	-0.705768
ABR_-_1083256.23-P1P2	-0.0650811	-0.457998	-0.483683
ABR_-_1083263.23-P1P2	-0.00947279	0.282659	0.22382
ABT1_+_26597184.23-P1P2	-0.0667875	0.0909256	-0.0373876
ABT1_+_26597412.23-P1P2	-0.00103739	-0.207596	-0.162206
ABT1_-_26597263.23-P1P2	-0.0455493	0.0923042	0.00236676
ABT1_-_26597427.23-P1P2	0.0390253	-0.105863	-0.00605586
ABT1_-_26597617.23-P1P2	0.041977	0.0477595	0.125082
ABTB1_+_127391808.23-P1P2	0.0187055	-0.445567	-0.321124
ABTB1_+_127391828.23-P1P2	-0.0299537	0.351184	0.242673
ABTB1_+_127391831.23-P1P2	0.00745697	0.0862759	0.0938336
ABTB1_+_127392221.23-P1P2	-0.00981801	-0.0913061	-0.0829692
ABTB1_-_127392198.23-P1P2	-0.218576	-1.01302	-1.21723
ABTB2_-_34379074.23-P1P2	-0.0322082	-0.0390749	-0.0809288
ABTB2_-_34379146.23-P1P2	0.0521666	-0.154383	-0.0218789
ABTB2_-_34379310.23-P1P2	0.0417591	0.26626	0.30357
ABTB2_-_34379465.23-P1P2	-0.0419867	0.0722326	-0.00758645
ABTB2_-_34379521.23-P1P2	-0.0423452	0.183765	0.0830722
ACAA1_+_38178488.23-P1P2	0.0405492	0.0784718	0.147629
ACAA1_+_38178517.23-P1P2	-0.109357	-0.984356	-0.995131
ACAA1_+_38178570.23-P1P2	0.118006	0.23241	0.414527
ACAA1_-_38178168.23-P1P2	-0.0289204	-0.204802	-0.210629
ACAA1_-_38178575.23-P1P2	-0.0650611	-0.00744742	-0.114785
ACAA2_+_47339850.23-P1P2	0.0207387	-0.641885	-0.478151
ACAA2_-_47339449.23-P1P2	-0.00138138	-0.0329114	-0.0198183
ACAA2_-_47339855.23-P1P2	0.0228708	0.180985	0.199404
ACAA2_-_47339858.23-P1P2	-0.00841393	-0.278364	-0.233558
ACAA2_-_47339876.23-P1P2	0.00109662	0.146625	0.131673
ACACA_+_35715534.23-P1P2	-0.130249	0.280361	0.00228506
ACACA_+_35715655.23-P1P2	-0.194286	-0.0157867	-0.356633
ACACA_-_35715847.23-P1P2	0.0274451	-1.02545	-0.779972
ACACA_-_35715992.23-P1P2	0.0305531	-0.133785	-0.0443238
ACACA_-_35716002.23-P1P2	-0.0828899	0.786213	0.502553
ACACB_+_109569160.23-P1	-0.00606407	0.178815	0.145004
ACACB_+_109569170.23-P1	0.0417945	-0.135742	-0.0254815
ACACB_+_109592574.23-P2	0.0998029	0.0607612	0.240894
ACACB_+_109592655.23-P2	-0.005569	-0.202871	-0.166578
ACACB_+_109592908.23-P2	0.0674849	-1.42018	-1.03032
ACACB_-_109569178.23-P1	0.114378	-0.652056	-0.316176
ACACB_-_109569231.23-P1	0.0142636	-0.220116	-0.144627
ACACB_-_109569639.23-P1	-0.00698789	0.0254399	0.0177569
ACACB_-_109592496.23-P2	0.0311516	-0.389174	-0.25232
ACACB_-_109592519.23-P2	-0.048999	-0.0375267	-0.110199
ACAD10_+_112124115.23-P1P2	0.0369579	-0.0354279	0.0478488
ACAD10_-_112123894.23-P1P2	-0.0327646	-0.931059	-0.812201
ACAD10_-_112123907.23-P1P2	-0.0982974	0.136644	-0.0572654
ACAD10_-_112123925.23-P1P2	0.0111271	-0.255835	-0.179575
ACAD10_-_112124210.23-P1P2	-0.0280163	-0.579057	-0.515384
ACAD11_+_132378312.23-P1P2	-0.0138884	0.371548	0.288563
ACAD11_+_132379379.23-P1P2	0.093471	0.249901	0.384225
ACAD11_-_132378623.23-P1P2	0.0491747	-0.240372	-0.0977186
ACAD11_-_132378633.23-P1P2	0.0361914	0.23808	0.270373
ACAD11_-_132379444.23-P1P2	0.0532931	-0.211665	-0.0667263
ACAD8_+_134123511.23-P1P2	0.112216	-0.342713	-0.0668512
ACAD8_-_134123448.23-P1P2	0.0832814	-0.904209	-0.579167
ACAD8_-_134123455.23-P1P2	-0.0579287	-0.00397771	-0.0989728
ACAD8_-_134123502.23-P1P2	-0.0157797	-0.100518	-0.101354
ACAD8_-_134123507.23-P1P2	-0.00923016	-0.350133	-0.2938
ACAD9_+_128598604.23-P1P2	0.00420113	-0.108848	-0.0718345
ACAD9_-_128598499.23-P1P2	-0.067414	-0.413372	-0.451392
ACAD9_-_128598508.23-P1P2	-0.172291	0.178374	-0.157672
ACAD9_-_128598528.23-P1P2	-0.128014	0.301704	0.0238219
ACAD9_-_128598541.23-P1P2	-0.0135868	0.0142311	-0.00342101
ACADL_+_211089722.23-P1P2	-0.0186016	0.154901	0.102624
ACADL_-_211089695.23-P1P2	-0.0325707	-0.0445741	-0.0860902
ACADL_-_211090030.23-P1P2	0.0175	-0.0506843	-2.93229e-05
ACADL_-_211090048.23-P1P2	-0.0252792	-0.334359	-0.310073
ACADL_-_211090095.23-P1P2	-0.00219826	0.0801125	0.0712277
ACADM_+_76190107.23-P1P2	-0.0797006	0.6252	0.376534
ACADM_+_76190432.23-P1P2	-0.120429	0.107457	-0.12141
ACADM_+_76190695.23-P1P2	-0.0254537	-0.276101	-0.262696
ACADM_-_76190475.23-P1P2	-0.0522925	0.507601	0.330103
ACADM_-_76190633.23-P1P2	-0.0263566	-0.0420158	-0.0726942
ACADSB_+_124768874.23-P1P2	-0.105507	-0.0808115	-0.248406
ACADSB_+_124768891.23-P1P2	0.122823	0.0506781	0.274505
ACADSB_+_124768941.23-P1P2	-0.00958059	-0.512083	-0.427024
ACADSB_+_124768944.23-P1P2	0.0688951	-0.821546	-0.537656
ACADSB_-_124768552.23-P1P2	-0.109239	0.357292	0.103478
ACADS_+_121163685.23-P1P2	-0.0335749	0.119488	0.0463998
ACADS_+_121164090.23-P1P2	-0.153822	-0.0473655	-0.308895
ACADS_-_121163653.23-P1P2	0.0524585	-0.0213187	0.0875907
ACADS_-_121163657.23-P1P2	0.0325946	0.226234	0.254133
ACADS_-_121163671.23-P1P2	-0.0762155	0.272857	0.0944114
ACADVL_-_7123221.23-P1P2	0.0323046	-0.6494	-0.463268
ACADVL_-_7123283.23-P1P2	-0.00419309	-0.448977	-0.365562
ACADVL_-_7123639.23-P1P2	0.0903734	-1.23421	-0.836439
ACADVL_-_7123665.23-P1P2	0.0329805	-0.0970055	-0.00979787
ACADVL_-_7123677.23-P1P2	0.0803205	0.060856	0.205539
ACAN_+_89347139.23-P1P2	-0.184295	0.202036	-0.160133
ACAN_+_89347148.23-P1P2	-0.0321439	-1.02545	-0.886731
ACAN_+_89347151.23-P1P2	-0.0166595	0.434965	0.335442
ACAN_-_89346701.23-P1P2	-0.148345	0.388274	0.0577211
ACAN_-_89347101.23-P1P2	0.0182513	-0.22855	-0.14428
ACAP1_+_7239854.23-P1P2	0.0121626	-0.188443	-0.122518
ACAP1_+_7239956.23-P1P2	-0.0136371	0.408801	0.319519
ACAP1_+_7240320.23-P1P2	-0.0855127	-0.560591	-0.604834
ACAP1_-_7239866.23-P1P2	0.0920034	-0.420724	-0.167479
ACAP1_-_7240242.23-P1P2	0.0367949	-0.435273	-0.279797
ACAP2_+_195163707.23-P1P2	0.0328657	-0.0509358	0.0277102
ACAP2_-_195163352.23-P1P2	0.110843	0.320528	0.47364
ACAP2_-_195163362.23-P1P2	-0.357181	-0.739514	-1.2454
ACAP2_-_195163395.23-P1P2	0.00890051	0.285809	0.259815
ACAP2_-_195163655.23-P1P2	0.0292187	0.300253	0.308593
ACAP3_+_1243258.23-P1P2	-0.0435826	0.142164	0.0467636
ACAP3_+_1243337.23-P1P2	0.0683825	0.05413	0.178321
ACAP3_-_1243095.23-P1P2	0.0284033	-0.0636029	0.00922391
ACAP3_-_1243221.23-P1P2	0.0606581	0.0351154	0.148705
ACAP3_-_1243235.23-P1P2	-0.0804993	-0.222492	-0.318917
ACAT1_+_107992288.23-P1P2	-0.135872	0.576818	0.234765
ACAT1_+_107992310.23-P1P2	0.0470205	-0.169201	-0.0433693
ACAT1_+_107992321.23-P1P2	0.0118218	-0.170313	-0.108295
ACAT1_-_107992364.23-P1P2	-0.037212	0.0143225	-0.0463131
ACAT1_-_107992733.23-P1P2	-0.0791219	0.154532	-0.00774624
ACAT2_+_160183436.23-P1P2	-0.0559538	-1.01302	-0.918492
ACAT2_+_160183505.23-P1P2	0.0538994	-0.328431	-0.161219
ACAT2_-_160183054.23-P1P2	-0.0676889	-0.516853	-0.53661
ACAT2_-_160183095.23-P1P2	-0.0344393	0.500185	0.356501
ACAT2_-_160183174.23-P1P2	-0.00283103	0.109253	0.0939343
ACBD3_+_226374329.23-P1P2	0.0191828	0.0567998	0.0910274
ACBD3_+_226374366.23-P1P2	-0.034027	-1.61153	-1.3713
ACBD3_-_226373992.23-P1P2	0.0229221	0.165875	0.187127
ACBD3_-_226374403.23-P1P2	0.0720702	-0.634226	-0.378524
ACBD3_-_226374411.23-P1P2	0.0112863	0.254423	0.238459
ACBD4_+_43210021.23-P2	0.00217543	0.0322921	0.040032
ACBD4_+_43210042.23-P2	0.0815457	-0.120405	0.0593701
ACBD4_+_43210060.23-P2
ACBD4_+_43210408.23-P2	-0.108839	0.660054	0.352074
ACBD4_+_43213087.23-P1	0.0743684	0.129745	0.251113
ACBD4_+_43213412.23-P1
ACBD4_-_43210055.23-P2	0.0491797	-0.0796926	0.0338372
ACBD4_-_43213050.23-P1	-0.132508	0.497192	0.175694
ACBD4_-_43213072.23-P1	-0.0513439	-1.08141	-0.969081
ACBD4_-_43213075.23-P1	0.134659	-1.71341	-1.15017
ACBD5_+_27529332.23-P1P2	-0.0315064	-0.436085	-0.404681
ACBD5_+_27529682.23-P1P2	0.00443262	-0.525325	-0.412379
ACBD5_+_27529701.23-P1P2	0.0170671	0.192883	0.198589
ACBD5_+_27529710.23-P1P2	0.0203653	-0.38546	-0.268896
ACBD5_-_27529679.23-P1P2	-0.0356321	0.664036	0.488476
ACBD6_+_180471319.23-P1P2	-0.0023519	-0.225337	-0.179121
ACBD6_+_180471354.23-P1P2	0.0755137	-0.302414	-0.100609
ACBD6_+_180471617.23-P1P2	-0.0401932	-0.259072	-0.27556
ACBD6_-_180471532.23-P1P2	-0.00974806	-1.38115	-1.13883
ACBD6_-_180471707.23-P1P2	-0.0170894	-0.164718	-0.156295
ACBD7_+_15130520.23-P1P2	0.0727222	-0.482253	-0.252919
ACBD7_+_15130776.23-P1P2	0.0973684	-0.37668	-0.121663
ACBD7_-_15130379.23-P1P2	0.0350861	-0.228893	-0.113944
ACBD7_-_15130397.23-P1P2	-0.260052	0.863305	0.243464
ACBD7_-_15130438.23-P1P2	-0.0218949	-1.34851	-1.13382
ACCSL_+_44069616.23-ENST00000378832.1	-0.0684875	0.0477553	-0.0758225
ACCSL_+_44069971.23-ENST00000378832.1	-0.094897	0.16646	-0.0266711
ACCSL_+_44069981.23-ENST00000378832.1	-0.148823	0.434825	0.0949634
ACCSL_-_44069582.23-ENST00000378832.1	-0.0862991	-0.718608	-0.735632
ACCSL_-_44069930.23-ENST00000378832.1
ACCS_+_44087946.23-P1P2	0.0789241	-0.739514	-0.452257
ACCS_+_44088028.23-P1P2	0.0115219	0.0400396	0.0633732
ACCS_+_44088091.23-P1P2	0.0524604	-0.273883	-0.119178
ACCS_+_44088215.23-P1P2	-0.0911431	0.0682771	-0.100225
ACCS_-_44088090.23-P1P2	-0.086602	0.206962	0.0215744
ACD_+_67693748.23-P1P2	0.0280914	0.434875	0.416756
ACD_+_67694124.23-P1P2	-0.185876	0.20319	-0.162062
ACD_-_67693904.23-P1P2	-0.0088884	0.170972	0.133446
ACD_-_67693957.23-P1P2	0.0643269	-0.122244	0.0265486
ACD_-_67694143.23-P1P2	-0.187169	0.107154	-0.243039
ACE2_+_15619016.23-P1P2	0.227244	-0.934731
ACE2_+_15619087.23-P1P2	0.0682414	0.115353	0.228187
ACE2_-_15618594.23-P1P2	0.07272	-0.319922	-0.120024
ACE2_-_15618975.23-P1P2	-0.0787484	-1.22841	-1.13717
ACE2_-_15619013.23-P1P2	-0.0914457	0.26501	0.0602883
ACER1_+_6333110.23-P1P2	-0.00131893	0.108314	0.0959157
ACER1_+_6333137.23-P1P2	-0.0670481	0.675346	0.440599
ACER1_+_6333164.23-P1P2	-0.00697652	0.0911674	0.0715881
ACER1_-_6333545.23-P1P2	-0.162648	0.388319	0.0317448
ACER1_-_6333558.23-P1P2	0.01574	-0.565674	-0.424848
ACER2_+_19409007.23-P1P2	0.148118	-0.283649	0.0467975
ACER2_+_19409248.23-P1P2	0.0519002	-0.642115	-0.421665
ACER2_+_19409376.23-P1P2	0.0650058	-0.28941	-0.109074
ACER2_+_19409383.23-P1P2	0.0572645	-0.00274279	0.111539
ACER2_-_19409474.23-P1P2	0.0128572	0.289259	0.269835
ACER3_+_76571969.23-P1P2	-0.101485	0.744189	0.434329
ACER3_-_76571978.23-P1P2	-0.0982436	0.606875	0.327807
ACER3_-_76572000.23-P1P2	-0.052878	-1.6276	-1.4186
ACER3_-_76572003.23-P1P2	-0.02951	0.118882	0.0532967
ACER3_-_76572404.23-P1P2	-0.0102766	-0.0959988	-0.0876452
ACE_+_61554448.23-P1	-0.0178797	0.208052	0.147451
ACE_+_61554829.23-P1	-0.0116705	0.330408	0.258915
ACE_+_61562272.23-P2	0.046309	-0.0850085	0.0242643
ACE_+_61562293.23-P2	-0.134919	-0.153305	-0.361247
ACE_-_61554428.23-P1	-0.00492204	0.26216	0.215315
ACE_-_61554458.23-P1	0.0762995	0.33221	0.420381
ACE_-_61554461.23-P1	0.000108092	0.353361	0.299128
ACE_-_61562238.23-P2	-0.0373341	0.0312233	-0.0326986
ACE_-_61562443.23-P2	0.0261421	-0.580805	-0.418317
ACE_-_61562661.23-P2	-0.0191075	0.104363	0.060329
ACHE_+_100493456.23-P1	-0.0366156	0.442304	0.305157
ACHE_+_100493473.23-P1	0.0937587	-0.121635	0.0805753
ACHE_+_100494559.23-P2	0.0367525	-0.436348	-0.280754
ACHE_+_100494570.23-P2	-0.0340826	-0.00575849	-0.0570619
ACHE_-_100493122.23-P1	-0.016437	0.14026	0.0945737
ACHE_-_100493427.23-P1	-0.0771717	-0.246452	-0.332481
ACHE_-_100493486.23-P1	-0.0100182	0.0361445	0.0210094
ACHE_-_100494233.23-P2	0.0459425	-0.27028	-0.128083
ACHE_-_100494236.23-P2	0.0474827	-0.149132	-0.0260989
ACHE_-_100494578.23-P2	0.00614636	-0.310962	-0.233765
ACIN1_+_23564314.23-P1	0.119658	-0.144796	0.108716
ACIN1_-_23540292.23-P2	-0.0501205	-0.314472	-0.338971
ACIN1_-_23540722.23-P2	-0.0542373	-0.259302	-0.301291
ACIN1_-_23540730.23-P2	-0.1211	-1.28293	-1.25845
ACIN1_-_23540744.23-P2	-0.0698268	-1.32481	-1.20196
ACIN1_-_23540756.23-P2	-0.154588	-0.0636346	-0.323607
ACIN1_-_23563847.23-P1	0.011074	0.559404	0.487758
ACIN1_-_23563913.23-P1	0.0459532	0.061045	0.14319
ACIN1_-_23564262.23-P1	-0.0772684	-0.0579839	-0.17836
ACIN1_-_23564284.23-P1	-0.0208259	0.0690949	0.0283298
ACKR2_+_42850956.23-P1P2	-0.027282	0.986832	0.767932
ACKR2_-_42850976.23-P1P2	0.0422676	0.442612	0.448873
ACKR2_-_42850992.23-P1P2	0.0598296	-0.205251	-0.0495877
ACKR2_-_42851020.23-P1P2	-0.0247151	0.214078	0.139953
ACKR2_-_42851479.23-P1P2	0.0894973	-0.278416	-0.0555303
ACKR3_+_237476473.23-P2	0.0142525	-0.341144	-0.243732
ACKR3_+_237476822.23-P2	0.201089	-1.43634
ACKR3_+_237478500.23-P1	-0.00987592	0.0151791	0.00410404
ACKR3_+_237478916.23-P1	-0.154119	0.40318	0.0594241
ACKR3_+_237478950.23-P1	0.0244946	-0.0537183	0.0102077
ACKR3_-_237476493.23-P2	0.0480223	-0.0761565	0.0346274
ACKR3_-_237476505.23-P2	0.0154849	0.287658	0.273303
ACKR3_-_237476900.23-P2	0.102658	-1.3976	-0.947865
ACKR3_-_237478578.23-P1	-0.00808142	-0.299471	-0.250234
ACKR3_-_237478610.23-P1	-0.127168	-0.909703	-0.966406
ACKR4_+_132316377.23-P1P2	-0.29459		-1.28473
ACKR4_-_132316111.23-P1P2	0.0448841	0.127804	0.1959
ACKR4_-_132316167.23-P1P2	0.136615	-1.42201	-0.910896
ACKR4_-_132316171.23-P1P2
ACKR4_-_132316525.23-P1P2	0.0270221	0.19674	0.219853
ACLY_+_40074807.23-P1P2	-0.165957	-0.107514	-0.380208
ACLY_+_40075121.23-P1P2	-0.0624891	0.254731	0.104536
ACLY_-_40074817.23-P1P2	-0.139866	0.0112568	-0.235519
ACLY_-_40075090.23-P1P2	0.0417945	0.396567	0.410315
ACLY_-_40075227.23-P1P2	0.00839625	0.0687744	0.0812135
ACMSD_+_135596183.23-P1P2	-0.0723045	0.199947	0.0418338
ACMSD_-_135596123.23-P1P2	0.0118345	-0.0772877	-0.0321132
ACMSD_-_135596200.23-P1P2	-0.0759633	0.493505	0.275512
ACMSD_-_135596354.23-P1P2	0.0784884	-0.323993	-0.112866
ACMSD_-_135596438.23-P1P2	-0.0673419	-0.0282177	-0.135937
ACN9_+_96747104.23-P1P2	-0.0929941	0.0601438	-0.11025
ACN9_+_96747240.23-P1P2	-0.0234042	0.353424	0.256419
ACN9_+_96747363.23-P1P2	0.0515493	-0.0641823	0.0508451
ACN9_-_96747046.23-P1P2	0.0577532	-0.236435	-0.0788936
ACN9_-_96747065.23-P1P2	-0.0265009	0.480796	0.355065
ACO1_+_32384680.23-P1P2	0.040188	-0.282893	-0.148874
ACO1_+_32385057.23-P1P2	-0.0279545	0.084197	0.0277291
ACO1_-_32384733.23-P1P2	0.0937411	-0.0423188	0.145478
ACO1_-_32385047.23-P1P2	0.0199841	0.194306	0.20506
ACO1_-_32385064.23-P1P2	0.00543571	0.211247	0.19247
ACO2_+_41865203.23-P1P2	-0.034892	0.146909	0.0664536
ACO2_+_41865228.23-P1P2	-0.228578	0.183561	-0.255794
ACO2_+_41865345.23-P1P2	0.0873149	-0.660519	-0.372325
ACO2_-_41865209.23-P1P2	0.0175605	0.168959	0.179901
ACO2_-_41865534.23-P1P2	0.0553973	-0.564405	-0.351685
ACOT11_+_55007947.23-P2	0.0814465	-1.09353	-0.737503
ACOT11_+_55007963.23-P2	0.00505092	-0.255685	-0.190503
ACOT11_+_55008406.23-P2	0.00983753	-0.0999734	-0.0543177
ACOT11_+_55013888.23-P1	-0.0983683	-0.193038	-0.327302
ACOT11_+_55013964.23-P1	-0.0202807	-0.562669	-0.487899
ACOT11_+_55013970.23-P1	-0.0500328	0.122921	0.0192784
ACOT11_-_55008004.23-P2	0.0814465	0.184984	0.309209
ACOT11_-_55008376.23-P2	0.0248665	0.314288	0.312168
ACOT11_-_55013950.23-P1	0.0445169	0.517038	0.513896
ACOT11_-_55014234.23-P1	0.111149	0.135674	0.322859
ACOT12_+_80689628.23-P1P2	-0.0335157	0.426076	0.297509
ACOT12_+_80689672.23-P1P2	-0.110704	0.57315	0.277535
ACOT12_+_80689929.23-P1P2	0.0250318	-0.310745	-0.199241
ACOT12_-_80689574.23-P1P2	-0.0955021	0.340743	0.114913
ACOT12_-_80689897.23-P1P2	-0.0243527	-0.182462	-0.184032
ACOT13_+_24667341.23-P1P2	-0.0656731	0.21453	0.065833
ACOT13_-_24667329.23-P1P2	0.0967109	0.0904336	0.259563
ACOT13_-_24667371.23-P1P2	0.0301658	0.539567	0.506239
ACOT13_-_24667386.23-P1P2	0.100284	-0.0127029	0.181624
ACOT13_-_24667473.23-P1P2	0.0535397	0.170315	0.246446
ACOT1_+_74003818.23-P1P2	0.00625749	-0.322978	-0.2434
ACOT1_+_74003843.23-P1P2	-0.00404122	0.0899918	0.0759641
ACOT1_+_74004100.23-P1P2	0.0816516	-0.0190882	0.14251
ACOT1_-_74004062.23-P1P2	0.122408	-0.554477	-0.221685
ACOT1_-_74004076.23-P1P2	0.114736	-0.233238	0.0273583
ACOT2_+_74035740.23-P1P2	0.00424476	0.189574	0.172561
ACOT2_+_74035970.23-P1P2	-0.0209534	-0.680234	-0.585372
ACOT2_+_74036024.23-P1P2	0.00386586	0.259915	0.22946
ACOT2_-_74036051.23-P1P2	-0.106444	0.140332	-0.0690615
ACOT2_-_74036501.23-P1P2	-0.0165235	0.158709	0.109521
ACOT4_+_74058635.23-P1P2	-0.0311071	-0.192779	-0.204763
ACOT4_+_74058647.23-P1P2	-0.758575		-0.794306
ACOT4_+_74058910.23-P1P2	-0.0497257	0.160933	0.0509573
ACOT4_+_74058918.23-P1P2	0.0521785	0.262832	0.319713
ACOT4_-_74059268.23-P1P2	-0.00424475	0.206821	0.171241
ACOT6_+_74077704.23-P1P2	-0.0189066	-0.634336	-0.544072
ACOT6_+_74077926.23-P1P2	0.0313679	0.471843	0.452981
ACOT6_+_74078053.23-P1P2	0.0705667	0.267885	0.357293
ACOT6_-_74077984.23-P1P2	-0.0360105	-0.0335696	-0.0833369
ACOT6_-_74078059.23-P1P2	-0.0173748	-0.0346136	-0.050299
ACOT7_+_6453356.23-P1P2	-0.0550094	-0.0712207	-0.148715
ACOT7_-_6453334.23-P1P2	0.083392	-0.141993	0.0450544
ACOT7_-_6453369.23-P1P2	-0.122758	-0.260341	-0.42676
ACOT7_-_6453388.23-P1P2	0.0207606	-1.80053	-1.42668
ACOT7_-_6453406.23-P1P2	-0.107548	0.20798	-0.0156868
ACOT8_+_44485553.23-P1P2	0.0328374	0.159536	0.19997
ACOT8_+_44486016.23-P1P2	0.112461	-0.30172	-0.0328458
ACOT8_-_44485597.23-P1P2	-0.076779	0.378605	0.179962
ACOT8_-_44485992.23-P1P2	-0.00243863	0.286059	0.239397
ACOT8_-_44486001.23-P1P2	-0.0995106	-0.0702114	-0.228822
ACOT9_+_23761133.23-P1P2	0.0663256	-0.359404	-0.163977
ACOT9_+_23761350.23-P1P2	-0.0777733	-0.0774509	-0.195216
ACOT9_+_23761360.23-P1P2	0.000690729	-0.602864	-0.482665
ACOT9_-_23761316.23-P1P2	-0.0626105	-0.332526	-0.376467
ACOT9_-_23761394.23-P1P2	0.0607273	0.061021	0.17004
ACOX1_+_73975227.23-P1P2	0.00130088	0.190294	0.167796
ACOX1_-_73975169.23-P1P2	0.0161805	0.136647	0.150937
ACOX1_-_73975193.23-P1P2	0.020269	0.27806	0.274147
ACOX1_-_73975196.23-P1P2	-0.213456	0.374872	-0.0716671
ACOX1_-_73975245.23-P1P2	0.0567696	-0.08103	0.0465461
ACOX2_+_58512428.23-P2	-0.0347674	-0.000549933	-0.0540432
ACOX2_+_58512441.23-P2	0.0118527	-0.622121	-0.47813
ACOX2_+_58522520.23-P1	-0.0290162	0.107279	0.0446948
ACOX2_+_58522852.23-P1	0.0197285	0.172943	0.187105
ACOX2_+_58522860.23-P1	0.0333036	-0.235086	-0.122255
ACOX2_+_58522888.23-P1	0.0735797	0.0848591	0.21293
ACOX2_+_58522893.23-P1	0.00616009	0.126457	0.12437
ACOX2_-_58512038.23-P2	-0.0279008	0.206023	0.127564
ACOX2_-_58512043.23-P2	0.0969388	-0.491403	-0.216368
ACOX2_-_58512435.23-P2	0.0102119	0.476488	0.418307
ACOX3_+_8430113.23-P1	-0.000138009	0.169035	0.147775
ACOX3_+_8430140.23-P1	-0.0214368	0.185287	0.122344
ACOX3_+_8442373.23-P2	-0.0460377	0.250977	0.131382
ACOX3_+_8442383.23-P2	0.0573143	0.477353	0.50468
ACOX3_+_8442467.23-P2	0.0319188	0.121126	0.166854
ACOX3_-_8430094.23-P1	0.0272554	0.162579	0.19231
ACOX3_-_8430121.23-P1	0.0753617	-0.172568	0.00541777
ACOX3_-_8430129.23-P1	0.0691824	0.196257	0.296134
ACOX3_-_8442419.23-P2	0.0772324	0.314764	0.407795
ACOX3_-_8442435.23-P2	0.0335341	-0.274091	-0.153769
ACOXL_+_111490271.23-P1P2	-0.0449091	-0.193582	-0.230521
ACOXL_+_111490547.23-P1P2	-0.0234619	0.0999667	0.0488102
ACOXL_+_111490560.23-P1P2	-0.057867	-0.206215	-0.26443
ACOXL_+_111490595.23-P1P2	0.00955804	0.566088	0.490473
ACOXL_-_111490612.23-P1P2	-0.0023259	0.343111	0.28631
ACP1_+_264980.23-P1P2	0.0424927	-0.936665	-0.67992
ACP1_+_265303.23-P1P2	0.0418874	-0.497065	-0.321124
ACP1_-_264967.23-P1P2	-0.00975133	-0.604123	-0.502687
ACP1_-_264970.23-P1P2	-0.379901	0.396658	-0.356543
ACP1_-_265107.23-P1P2	-0.0556032	-1.51951	-1.33549
ACP2_+_47270320.23-P1P2	0.0912809	-0.0071258	0.169816
ACP2_+_47270332.23-P1P2
ACP2_-_47269915.23-P1P2	-0.0559538	0.763317	0.532797
ACP2_-_47269958.23-P1P2	-0.0186016	0.0189172	-0.00870498
ACP2_-_47270385.23-P1P2	-0.0725155	-0.163033	-0.255719
ACP5_+_11688472.23-P1	-0.147221	0.303096	-0.00996952
ACP5_-_11688086.23-P1	0.0638187	-0.151379	0.00177181
ACP5_-_11688414.23-P1	0.0340127	0.0957133	0.149857
ACP5_-_11688437.23-P1	-0.0134793	-0.541072	-0.457848
ACP5_-_11688455.23-P1	-0.0592998	-0.0365684	-0.128148
ACP5_-_11689356.23-P2	0.0472903	-0.336694	-0.180003
ACP5_-_11689724.23-P2	-0.0111109	0.0379454	0.0204966
ACP5_-_11689727.23-P2	-0.0486114	-0.074371	-0.139658
ACP5_-_11689744.23-P2	0.0589172	-0.450813	-0.252286
ACP5_-_11689771.23-P2	-0.0298113	0.256283	0.165238
ACP6_+_147141956.23-P1P2	0.015956	0.273202	0.262326
ACP6_+_147142159.23-P1P2	-0.0179322	-1.22175	-1.02279
ACP6_-_147142348.23-P1P2	-0.00412583	0.204911	0.169894
ACP6_-_147142356.23-P1P2	-0.117003	-0.200806	-0.367552
ACP6_-_147142393.23-P1P2	0.064827	0.41675	0.468728
ACPL2_+_140950942.23-P1P2	-0.2447	-1.27729	-1.47736
ACPL2_+_140950963.23-P1P2
ACPL2_+_140951037.23-P1P2	-0.188242	0.55556	0.122117
ACPL2_+_140951203.23-P1P2	-0.0349863	0.263186	0.161477
ACPL2_-_140950647.23-P1P2	-0.0394271	-0.0482307	-0.101554
ACPP_+_132036268.23-P1P2	0.00081476	0.0210186	0.0283278
ACPP_+_132036293.23-P1P2	-0.0209361	0.192688	0.129314
ACPP_+_132036338.23-P1P2	0.0277321	0.0882789	0.132348
ACPP_+_132036504.23-P1P2	-0.00606407	0.509731	0.415922
ACPP_+_132036703.23-P1P2	0.108185	-0.567079	-0.257869
ACPT_+_51293697.23-ENST00000270593.1	0.0102976	-0.416753	-0.312826
ACPT_+_51293761.23-ENST00000270593.1	0.045376	-0.0793018	0.0272396
ACPT_+_51294074.23-ENST00000270593.1	-0.0257248	-0.158478	-0.166892
ACPT_-_51293910.23-ENST00000270593.1	-0.0390529	-0.0053542	-0.0657704
ACPT_-_51294122.23-ENST00000270593.1	-0.141925	-1.2598	-1.27691
ACRBP_+_6756555.23-P1P2	-0.00954042	0.0067543	-0.00218312
ACRBP_+_6756569.23-P1P2	0.0218571	0.291208	0.287799
ACRBP_+_6756572.23-P1P2	0.00407085	0.0247424	0.0372983
ACRBP_-_6756126.23-P1P2	-0.0316035	-0.517875	-0.471818
ACRBP_-_6756147.23-P1P2	0.0466628	0.155106	0.221488
ACRC_-_70797923.23-P1P2	-0.107555	-1.28293	-1.23402
ACRC_-_70798359.23-P1P2	0.0979018	0.0561673	0.233675
ACRC_-_70798376.23-P1P2	-0.0924909	0.288454	0.0775809
ACRC_-_70798717.23-P1P2
ACRC_-_70798784.23-P1P2	0.0213206	0.415446	0.388536
ACRV1_+_125550253.23-P1P2	0.0779414	0.198225	0.313674
ACRV1_+_125550420.23-P1P2	0.0122959	-1.75853	-1.40783
ACRV1_+_125550697.23-P1P2	0.0131133	0.169845	0.172538
ACRV1_-_125550324.23-P1P2	-0.0289204	0.151137	0.0807753
ACRV1_-_125550695.23-P1P2	-0.0951057	0.484864	0.233624
ACR_+_51177061.23-P1P2	-0.0330974	0.355816	0.240748
ACR_+_51177099.23-P1P2	-0.0445891	0.00081339	-0.0707896
ACR_-_51176666.23-P1P2	0.0381943	0.511409	0.497788
ACR_-_51176714.23-P1P2	-0.0698079	0.624133	0.393652
ACR_-_51176829.23-P1P2	0.042974	-0.159327	-0.042645
ACSBG1_+_78526472.23-P1P2	-0.0916395	-0.184237	-0.307859
ACSBG1_+_78526497.23-P1P2	0.0020011	-0.990549	-0.797677
ACSBG1_+_78526814.23-P1P2	-0.0750383	0.274216	0.0976647
ACSBG1_+_78526846.23-P1P2	0.0750911	-0.469021	-0.237777
ACSBG1_-_78526810.23-P1P2	-0.0287587	-0.542848	-0.48709
ACSBG2_+_6135737.23-P1P2	0.116068	0.195983	0.38118
ACSBG2_-_6135670.23-P1P2	-0.000491572	0.463789	0.388445
ACSBG2_-_6135684.23-P1P2	0.00783921	-0.00235868	0.0219643
ACSBG2_-_6135704.23-P1P2	-0.0419725	-0.0234731	-0.0859141
ACSBG2_-_6135770.23-P1P2	-0.0664941	0.436859	0.246359
ACSF2_+_48503620.23-P1P2	0.0436048	0.232111	0.278969
ACSF2_+_48503830.23-P1P2	-0.00106819	0.369021	0.30981
ACSF2_-_48503625.23-P1P2	0.0691517	-0.152737	0.010359
ACSF2_-_48503638.23-P1P2	0.125153	-1.37728	-0.890318
ACSF2_-_48503858.23-P1P2	-0.0841361	0.0239873	-0.123741
ACSF3_+_89160267.23-P1P2	0.0322514	0.190419	0.224188
ACSF3_+_89160393.23-P1P2	-0.0122354	0.113263	0.080113
ACSF3_+_89160580.23-P1P2	0.131113	-0.863234	-0.458629
ACSF3_-_89160263.23-P1P2	-0.0361973	-1.1156	-0.969524
ACSF3_-_89160302.23-P1P2	-0.0288267	-0.243127	-0.241835
ACSL1_+_185746700.23-P1P2	-0.0844632	-0.32721	-0.411858
ACSL1_+_185747071.23-P1P2	0.0191991	-0.330458	-0.225988
ACSL1_+_185747074.23-P1P2	0.0487743	0.0172367	0.112455
ACSL1_+_185747085.23-P1P2	-0.00667299	-0.249207	-0.206522
ACSL1_-_185746686.23-P1P2	0.0490287	-0.606382	-0.397633
ACSL3_+_223725692.23-P1P2	-0.119562	-0.221698	-0.38931
ACSL3_+_223726215.23-P1P2	-0.0434179	0.721328	0.52122
ACSL3_-_223725802.23-P1P2	-0.0639345	-0.568295	-0.571897
ACSL3_-_223725834.23-P1P2	-0.00367893	0.0704917	0.0606584
ACSL3_-_223726162.23-P1P2	-0.125425	0.166624	-0.0820572
ACSL4_+_108976382.23-P1P2	-0.112222	0.156166	-0.0666071
ACSL4_-_108976096.23-P1P2	-0.171062	0.484665	0.0953208
ACSL4_-_108976106.23-P1P2	-0.0856846	0.477286	0.244555
ACSL4_-_108976456.23-P1P2	-0.0666535	0.312057	0.143894
ACSL4_-_108976463.23-P1P2	-0.0695447	-1.66813	-1.48203
ACSL5_+_114136352.23-P1	0.0611804	-0.348108	-0.164087
ACSL5_+_114136372.23-P1	-0.18037	0.506732	0.0964587
ACSL5_-_114133923.23-P2	-0.0220961	-0.69715	-0.601298
ACSL5_-_114133956.23-P2	0.0951582	-0.191884	0.0256081
ACSL5_-_114133986.23-P2	0.0378807	-0.300652	-0.16761
ACSL5_-_114134322.23-P2	0.0252199	-0.277566	-0.171735
ACSL5_-_114134410.23-P2	-0.0278262	0.168541	0.0970141
ACSL5_-_114136013.23-P1	-0.239451		-0.661388
ACSL5_-_114136040.23-P1	0.0700832	-0.255802	-0.072325
ACSL5_-_114136407.23-P1	-0.0407028	-0.182665	-0.213934
ACSL6_+_131310427.23-P2	0.00683736	-0.382459	-0.291043
ACSL6_+_131346969.23-P1	0.0820889	-0.580805	-0.316567
ACSL6_+_131347320.23-P1	0.0652766	-0.197264	-0.0331418
ACSL6_+_131347346.23-P1	-0.058465	-0.198131	-0.2589
ACSL6_-_131310249.23-P2	-0.0519839	0.256496	0.125087
ACSL6_-_131310298.23-P2	-0.0892149	-0.0160893	-0.165788
ACSL6_-_131310302.23-P2	-0.0595334	-0.453082	-0.469569
ACSL6_-_131310682.23-P2	0.0570815	0.243996	0.313209
ACSL6_-_131347379.23-P1	-0.174879	0.275389	-0.0829546
ACSL6_-_131347437.23-P1	-0.210486	0.365922	-0.0735939
ACSM1_+_20686984.23-P1P2	-0.114712	0.459692	0.177359
ACSM1_+_20687058.23-P1P2	-0.0734552	0.361431	0.171946
ACSM1_-_20687024.23-P1P2	0.00922607	-0.440054	-0.333851
ACSM1_-_20687076.23-P1P2	-0.0204409	0.243615	0.171908
ACSM1_-_20687521.23-P1P2	-0.00310443	0.314117	0.261157
ACSM2A_-_20462920.23-P1P2	-0.207437		-0.614641
ACSM2A_-_20462957.23-P1P2	0.0178017	-0.00686172	0.0363964
ACSM2A_-_20463169.23-P1P2	-0.0274604	0.346869	0.243675
ACSM2A_-_20463214.23-P1P2	0.0886868	0.0846645	0.240246
ACSM2A_-_20463283.23-P1P2	0.0239329	0.32142	0.316309
ACSM2B_+_20587244.23-P1P2	0.0590259	-0.177963	-0.0287088
ACSM2B_+_20587247.23-P1P2	0.0271315	-0.74971	-0.554799
ACSM2B_+_20587316.23-P1P2	0.0886868	0.0846645	0.240246
ACSM2B_+_20587361.23-P1P2	-0.0274604	0.346869	0.243675
ACSM2B_+_20587573.23-P1P2	0.0178017	-0.00686172	0.0363964
ACSM3_+_20775307.23-P1P2	0.0155975	0.146316	0.157793
ACSM3_+_20775331.23-P1P2	-0.0704202	0.41281	0.21953
ACSM3_+_20775412.23-P1P2	0.0579357	0.309066	0.368035
ACSM3_-_20775380.23-P1P2	0.0767785	-0.112687	0.0570191
ACSM3_-_20775771.23-P1P2	-0.00262143	0.0480449	0.0442047
ACSM4_+_7456947.23-ENST00000399422.4	-0.0770376	0.490747	0.271301
ACSM4_+_7457146.23-ENST00000399422.4	0.191517	-0.00685296	0.352338
ACSM4_+_7457164.23-ENST00000399422.4	0.0103165	0.243028	0.227366
ACSM4_+_7457340.23-ENST00000399422.4	-0.0122287	0.31458	0.244942
ACSM4_+_7457345.23-ENST00000399422.4	0.0149485	-0.422183	-0.308813
ACSM5_-_20420881.23-P1P2	0.000444249	0.0733473	0.070495
ACSM5_-_20421144.23-P1P2	-0.0157586	0.333132	0.253711
ACSM5_-_20421170.23-P1P2	0.0787549	-0.278567	-0.0751911
ACSM5_-_20421270.23-P1P2	0.0374654	-0.245421	-0.123148
ACSM5_-_20421315.23-P1P2	0.0305146	-0.169503	-0.0736358
ACSS1_+_25038329.23-P1P2	0.258758	-0.0349284	0.451644
ACSS1_+_25038734.23-P1P2	0.0333325	0.378024	0.379745
ACSS1_+_25038767.23-P1P2	0.153052	-0.568295	-0.177265
ACSS1_-_25038359.23-P1P2	0.12482	0.607278	0.733821
ACSS1_-_25038372.23-P1P2	-0.087621	-1.42565	-1.31563
ACSS2_+_33464457.23-P1P2	-0.0403557	-0.451196	-0.433147
ACSS2_-_33464420.23-P1P2	-0.00124347	0.225825	0.192258
ACSS2_-_33464423.23-P1P2	-0.0521718	-0.0161205	-0.0984438
ACSS2_-_33464453.23-P1P2	0.0898132	-0.663583	-0.370289
ACSS2_-_33464808.23-P1P2	-0.0166252	-0.0567077	-0.0670239
ACSS3_+_81471956.23-P1P2	-0.0391502	0.142922	0.0554454
ACSS3_-_81471886.23-P1P2	-0.205747	0.0112568	-0.355337
ACSS3_-_81471913.23-P1P2	0.0379856	0.258303	0.290193
ACSS3_-_81472068.23-P1P2	-0.0291582	0.327935	0.225086
ACSS3_-_81472074.23-P1P2	0.0561706	-0.0548157	0.0669181
ACTA1_+_229568301.23-P2	0.010664	-0.134303	-0.0809201
ACTA1_+_229569744.23-P1	-0.0211827	-0.77553	-0.663806
ACTA1_-_229568328.23-P2	-0.0432706	-0.18322	-0.219058
ACTA1_-_229568723.23-P2	-0.0471786	0.185336	0.0755683
ACTA1_-_229568745.23-P2	-0.0377313	-0.0331908	-0.0861564
ACTA1_-_229568779.23-P2	0.125851	0.145192	0.35739
ACTA1_-_229569627.23-P1	-0.0324934	0.568399	0.415886
ACTA1_-_229569754.23-P1	-0.0710454	-0.0273742	-0.141982
ACTA1_-_229569824.23-P1	-0.164272	0.154901	-0.162306
ACTA1_-_229569839.23-P1	-0.0166827	0.17907	0.125901
ACTA2_+_90712275.23-P1	0.0526032	-0.557044	-0.35074
ACTA2_+_90712443.23-P1	-0.0115226	0.343321	0.269756
ACTA2_+_90712479.23-P1	0.0676037	-0.103506	0.0478488
ACTA2_+_90750678.23-P2	0.0152931	0.0796396	0.102652
ACTA2_+_90750694.23-P2	-0.0134131	-0.133865	-0.12435
ACTA2_+_90751072.23-P2	-0.0125588	0.00690196	-0.00755175
ACTA2_-_90712449.23-P1	0.0492874	-0.14934	-0.0229864
ACTA2_-_90712506.23-P1	0.134814	-0.431445	-0.0983958
ACTA2_-_90751052.23-P2	-0.0479611	-0.498026	-0.485318
ACTA2_-_90751066.23-P2	-0.00804107	-0.0898393	-0.0785367
ACTBL2_+_56778209.23-P1P2	0.0524958	-0.157398	-0.0237488
ACTBL2_+_56778273.23-P1P2	-0.0480585	-0.119239	-0.175386
ACTBL2_+_56778359.23-P1P2	-0.0430601	-0.0315167	-0.0944773
ACTBL2_-_56778219.23-P1P2	-0.0673026	-0.18349	-0.262986
ACTBL2_-_56778661.23-P1P2	-0.135813	0.52265	0.190526
ACTB_+_5569721.23-P1P2	0.002689	0.154376	0.140915
ACTB_+_5570130.23-P1P2	-0.0096895	0.0329628	0.0190024
ACTB_-_5568781.23-P1P2	0.0330669	-0.406825	-0.263288
ACTB_-_5570006.23-P1P2	-0.079532	0.367633	0.165972
ACTB_-_5570191.23-P1P2	-0.0327856	0.117185	0.0459498
ACTC1_+_35087479.23-P1P2	0.0433322	-0.117392	-0.00766179
ACTC1_-_35087222.23-P1P2	-0.131032	0.524396	0.20065
ACTC1_-_35087295.23-P1P2	0.0891378	-0.14458	0.0533862
ACTC1_-_35087685.23-P1P2	0.0196588	0.0558154	0.0910872
ACTC1_-_35087711.23-P1P2	-0.080175	0.508294	0.27996
ACTG1_-_79479746.23-P1P2	0.012317	-0.489761	-0.368924
ACTG1_-_79479777.23-P1P2	0.067286	-0.750403	-0.482338
ACTG1_-_79479780.23-P1P2	-0.0750648	0.139288	-0.0128478
ACTG1_-_79479785.23-P1P2	-0.0765822	0.150116	-0.00674249
ACTG1_-_79479816.23-P1P2	-0.062147	0.22305	0.0792211
ACTG2_+_74120163.23-P1	0.0437347	-1.48409	-1.12584
ACTG2_+_74120172.23-P1	0.0553067	0.0942936	0.187421
ACTG2_+_74120202.23-P1	-0.0812114	-1.06015	-1.006
ACTG2_+_74128454.23-P2	0.0714333	0.106339	0.226612
ACTG2_+_74128598.23-P2	-0.0210401	0.189963	0.126894
ACTG2_-_74120192.23-P1	-0.00155923	0.00189241	0.00835182
ACTG2_-_74120376.23-P1	0.0460087	-0.181085	-0.0549391
ACTG2_-_74128450.23-P2	0.0402382	0.386912	0.399581
ACTG2_-_74128624.23-P2	0.000933772	-0.316043	-0.247405
ACTG2_-_74128769.23-P2	0.0398683	-0.732392	-0.517457
ACTL10_+_32254796.23-P1P2	-0.211614	-0.0226348	-0.393753
ACTL10_-_32254768.23-P1P2	-0.0137915	-0.10318	-0.0999169
ACTL10_-_32254788.23-P1P2	0.0301716	0.175726	0.208377
ACTL10_-_32254809.23-P1P2	-0.0850007	-0.0378911	-0.175973
ACTL10_-_32254824.23-P1P2	-0.00397568	-1.57683	-1.28855
ACTL6A_+_179280744.23-P1P2	-0.206906	0.171875	-0.225948
ACTL6A_+_179280755.23-P1P2	-0.0680222	0.337463	0.162205
ACTL6A_+_179280849.23-P1P2	-0.121892	0.338072	0.0647312
ACTL6A_-_179280784.23-P1P2	-0.331284	-0.0791378	-0.657654
ACTL6A_-_179280860.23-P1P2	-0.664789		-1.15017
ACTL6B_+_100253966.23-P1P2	0.0941946	0.153489	0.306609
ACTL6B_+_100253969.23-P1P2	0.0887894	0.251286	0.376845
ACTL6B_+_100254000.23-P1P2	0.0916114	-0.0779905	0.112401
ACTL6B_-_100254007.23-P1P2	-0.100233	0.518001	0.251429
ACTL6B_-_100254010.23-P1P2	0.0607657	-0.544937	-0.325983
ACTL7A_+_111624526.23-P1P2	-0.123679		-0.966406
ACTL7A_-_111624563.23-P1P2	0.038237	-0.261715	-0.135084
ACTL7A_-_111624608.23-P1P2	0.112152	-0.316526	-0.0455289
ACTL7A_-_111624654.23-P1P2	-0.0152622	-0.0747295	-0.0792994
ACTL7A_-_111624958.23-P1P2	0.000698732	-0.760445	-0.611661
ACTL7B_+_111617819.23-P1P2	-0.0670189	0.36749	0.188612
ACTL7B_+_111617857.23-P1P2	-0.0897856	0.631035	0.362969
ACTL7B_+_111618198.23-P1P2	-0.11074	0.155432	-0.0645126
ACTL7B_-_111618185.23-P1P2	0.126121	0.114638	0.332866
ACTL7B_-_111618259.23-P1P2	-0.0916008	-0.148671	-0.278671
ACTL8_+_18081845.23-P1P2	-0.00521921	0.319678	0.261864
ACTL8_+_18081855.23-P1P2	-0.191815	-0.0874277	-0.41079
ACTL8_-_18081836.23-P1P2	-0.00460324	-0.120172	-0.0971173
ACTL8_-_18081842.23-P1P2	0.0500602	-0.829084	-0.578082
ACTL8_-_18081895.23-P1P2	0.00725141	-0.0105889	0.0141573
ACTL9_+_8808720.23-P1P2	0.0964104	0.272718	0.408251
ACTL9_+_8808755.23-P1P2	0.0344313	0.150207	0.195231
ACTL9_+_8808881.23-P1P2	-0.109925	0.288454	0.0458733
ACTL9_-_8808643.23-P1P2	-0.115737	0.16646	-0.0645719
ACTL9_-_8809073.23-P1P2	0.0889538	-0.191735	0.0144458
ACTN1_+_69445571.23-P1P2	-0.0348521	-0.435273	-0.410101
ACTN1_-_69445619.23-P1P2	-0.0639345	0.483239	0.288985
ACTN1_-_69445944.23-P1P2	-0.0645935	0.054831	-0.0629476
ACTN1_-_69445956.23-P1P2	-0.0198337	-0.426547	-0.375644
ACTN1_-_69446029.23-P1P2	0.119794	-1.94248	-1.36279
ACTN2_+_236849796.23-P1P2	0.053154	-1.39534	-1.03764
ACTN2_+_236849840.23-P1P2	-0.0983303	-1.07796	-1.05171
ACTN2_+_236849897.23-P1P2	0.0391198	-0.137425	-0.0317233
ACTN2_-_236849849.23-P1P2	-0.0633321	-0.241666	-0.303393
ACTN2_-_236850209.23-P1P2	-0.0414409	0.0439745	-0.0297283
ACTN3_+_66313715.23-P1P2	-0.0906123	-1.19126	-1.13043
ACTN3_+_66313730.23-P1P2	-0.0245105	0.110918	0.0558691
ACTN3_+_66313881.23-P1P2	0.0719689	-0.0885044	0.0680697
ACTN3_-_66313676.23-P1P2	-0.0685186	-0.590084	-0.598073
ACTN3_-_66314441.23-P1P2	0.0509926	0.24026	0.299077
ACTN4_-_39138303.23-P1P2	0.0326045	0.0228982	0.0876823
ACTN4_-_39138358.23-P1P2	0.0898423	-0.066386	0.118684
ACTN4_-_39138687.23-P1P2	0.0459484	-0.426675	-0.256111
ACTN4_-_39138723.23-P1P2	-0.0369643	0.149841	0.0650855
ACTN4_-_39138727.23-P1P2	-0.0199916	-0.27306	-0.250272
ACTR10_+_58666878.23-P1P2	-0.0433272	-1.17873	-1.03278
ACTR10_+_58666892.23-P1P2	-0.0583484	0.343526	0.184762
ACTR10_+_58666925.23-P1P2	-0.0465228	-0.63131	-0.591821
ACTR10_+_58666938.23-P1P2	-0.0097866	-0.141373	-0.123901
ACTR10_+_58667079.23-P1P2	-0.455708		-0.473661
ACTR1A_+_104262452.23-P1P2	0.0171035	-0.255415	-0.168362
ACTR1A_+_104262461.23-P1P2	0.0728643	-0.359679	-0.15231
ACTR1A_-_104261998.23-P1P2	0.00311037	0.0281734	0.0383604
ACTR1A_-_104262054.23-P1P2	0.0113572	0.0188665	0.0457393
ACTR1A_-_104262086.23-P1P2	0.111445	0.104821	0.298139
ACTR1B_+_98280441.23-P1P2	-0.133403	-1.49405	-1.45475
ACTR1B_+_98280464.23-P1P2	-0.0103159	0.152497	0.115725
ACTR1B_-_98279951.23-P1P2	-0.0905572	-0.34987	-0.441493
ACTR1B_-_98280407.23-P1P2	0.0424888	-0.392769	-0.234645
ACTR1B_-_98280450.23-P1P2	-0.183798	-0.0565142	-0.370902
ACTR2_+_65455294.23-P1P2	-0.358886		-0.840915
ACTR2_+_65455348.23-P1P2	0.0473602	-0.446492	-0.269767
ACTR2_-_65454953.23-P1P2	-0.07329	-0.950419	-0.901754
ACTR2_-_65454971.23-P1P2	-0.0441023	0.472782	0.316492
ACTR2_-_65455345.23-P1P2	-0.060212	-0.00691813	-0.105533
ACTR3B_+_152457249.23-P1P2	-0.150736	0.126852	-0.160652
ACTR3B_+_152457287.23-P1P2	0.108579	0.0768334	0.270013
ACTR3B_+_152457301.23-P1P2	-0.100438	-0.359548	-0.467386
ACTR3B_+_152457333.23-P1P2	-0.0117457	-0.897081	-0.746156
ACTR3B_+_152457345.23-P1P2	0.0378641	-0.585055	-0.400478
ACTR3C_+_150020242.23-P1P2	-0.191382	-1.22841	-1.34024
ACTR3C_+_150020273.23-P1P2	-0.0321439	0.874378	0.667025
ACTR3C_+_150020641.23-P1P2	-0.0405749	0.433905	0.291079
ACTR3C_-_150020122.23-P1P2	-0.048079	-0.135742	-0.188934
ACTR3C_-_150020411.23-P1P2	0.0834897	0.243739	0.361027
ACTR3_+_114647775.23-P1P2	-0.0206409	-0.0974006	-0.107642
ACTR3_+_114648069.23-P1P2	-0.00527747	0.16646	0.136319
ACTR3_-_114647984.23-P1P2	0.050791	0.138125	0.215093
ACTR3_-_114647989.23-P1P2	-0.058465	0.133643	0.0127212
ACTR3_-_114648039.23-P1P2	-0.0517768	-0.196827	-0.245668
ACTR5_+_37377138.23-P1P2	-0.258121	0.0770389	-0.396733
ACTR5_+_37377152.23-P1P2	-0.105532	-0.688739	-0.746156
ACTR5_+_37377158.23-P1P2	-0.252717	-0.797136	-1.10258
ACTR5_-_37377124.23-P1P2	0.0852444	-0.190419	0.00877703
ACTR5_-_37377127.23-P1P2	-0.093696	-0.0577958	-0.208083
ACTR6_+_100593852.23-P1P2	-0.156718	0.566767	0.188623
ACTR6_+_100594789.23-P1P2	-0.0377005	-0.672608	-0.609586
ACTR6_+_100594811.23-P1P2	0.102809	-0.450079	-0.17186
ACTR6_-_100594606.23-P1P2	-0.129664	0.0729618	-0.166448
ACTR6_-_100594621.23-P1P2	-0.379071	0.634504	-0.160311
ACTR8_+_53916118.23-P1P2	-0.217384	-1.30972	-1.45475
ACTR8_+_53916142.23-P1P2	-0.59807	0.934075	-0.313348
ACTR8_+_53916157.23-P1P2	-0.483336	0.964443	-0.0798197
ACTR8_-_53915974.23-P1P2	-0.28502		-0.495495
ACTR8_-_53916193.23-P1P2	-0.0743905	0.121089	-0.0265207
ACTRT1_+_127185986.23-P1P2	-0.0407446	0.247005	0.137758
ACTRT1_+_127186306.23-P1P2	0.0633436	-0.0501846	0.0837551
ACTRT1_+_127186328.23-P1P2	-0.0282356	-0.0865709	-0.112588
ACTRT1_-_127185969.23-P1P2	-0.0132983	0.114876	0.0795007
ACTRT1_-_127186343.23-P1P2	-0.0108475	0.128199	0.0948654
ACTRT2_+_2938135.23-P1P2	-0.0655869	-0.636914	-0.63108
ACTRT2_+_2938467.23-P1P2	-0.046068	0.0662324	-0.0199213
ACTRT2_-_2938118.23-P1P2	-0.183533	0.0554716	-0.278737
ACTRT2_-_2938494.23-P1P2	0.0784171	-0.00325375	0.149591
ACTRT2_-_2938499.23-P1P2	-0.0008242	0.147967	0.129278
ACTRT3_+_169487270.23-P1P2	-0.0447653	0.50425	0.34105
ACTRT3_+_169487327.23-P1P2	0.0427375	-0.172866	-0.0541589
ACTRT3_+_169487330.23-P1P2	-0.0309792	-0.58646	-0.526833
ACTRT3_+_169487342.23-P1P2	-0.0703313	0.518512	0.306229
ACTRT3_-_169487289.23-P1P2	0.00268378	0.134329	0.124493
ACVR1B_+_52345561.23-P1P2	-0.0455444	-0.250149	-0.277988
ACVR1B_+_52345897.23-P1P2	-0.118533	-0.25997	-0.418773
ACVR1B_+_52345907.23-P1P2	-0.0328256	0.525692	0.380318
ACVR1B_-_52345530.23-P1P2	-0.0342573	-0.195107	-0.212397
ACVR1B_-_52345917.23-P1P2	-0.0410311	-1.6664	-1.42895
ACVR1C_+_158484889.23-P1P2	-0.0369279	0.356279	0.234161
ACVR1C_+_158484901.23-P1P2	-0.030628	0.442151	0.31592
ACVR1C_+_158484938.23-P1P2	-0.0511977	0.0674637	-0.0282425
ACVR1C_+_158485339.23-P1P2	0.00550251	0.0950201	0.0974378
ACVR1C_-_158485307.23-P1P2	0.237911	-0.435803	0.0855374
ACVR1_+_158732079.23-P1P2	-0.0165347	0.0263313	0.0011239
ACVR1_+_158732198.23-P1P2	0.0171914	-0.168167	-0.0967725
ACVR1_+_158732232.23-P1P2	-0.178171	-0.0102038	-0.322753
ACVR1_+_158732258.23-P1P2	0.158775	-0.95692	-0.485022
ACVR1_-_158732511.23-P1P2	-0.00195652	0.55815	0.463033
ACVR2A_+_148602294.23-P1P2	0.0369474	0.29316	0.316842
ACVR2A_+_148602343.23-P1P2	0.129902	-0.490615	-0.155773
ACVR2A_+_148602346.23-P1P2	0.109454	-0.573144	-0.260528
ACVR2A_-_148602102.23-P1P2	-0.00426134	0.146332	0.121689
ACVR2A_-_148602669.23-P1P2	-0.0540473	0.208532	0.0820668
ACVR2B_+_38495339.23-P1P2	-0.0279273	-0.545793	-0.487989
ACVR2B_+_38495450.23-P1P2	-0.0668079	0.334127	0.161682
ACVR2B_+_38495606.23-P1P2	-0.052782	0.137042	0.0258388
ACVR2B_+_38495842.23-P1P2	0.0202389	-0.0508198	0.00484075
ACVR2B_-_38495819.23-P1P2	0.0291331	-0.0931024	-0.0135997
ACVRL1_+_52300726.23-P1P2	-0.0381779	0.211166	0.113084
ACVRL1_+_52300742.23-P1P2	0.103945	-0.645965	-0.330164
ACVRL1_+_52300819.23-P1P2	-0.0973787	0.504281	0.245387
ACVRL1_-_52300776.23-P1P2	-0.150819	-1.03149	-1.10913
ACVRL1_-_52301119.23-P1P2	0.132005	-0.671798	-0.300281
ACY1_+_52017535.23-P1P2	-0.0196088	-0.0552991	-0.071297
ACY1_+_52017980.23-P1P2	-0.00465194	0.315419	0.259409
ACY1_-_52017547.23-P1P2	0.0544846	0.418819	0.451612
ACY1_-_52017921.23-P1P2	0.0209693	0.312507	0.303622
ACY1_-_52017938.23-P1P2	0.0865686	-1.72674	-1.24762
ACY3_+_67414985.23-P2	-0.00178667	0.2478	0.20926
ACY3_+_67415013.23-P2	-0.208205	0.872754	0.345494
ACY3_+_67417722.23-P1	-0.204009		-0.517672
ACY3_+_67417960.23-P1	0.128098	-0.426944	-0.106926
ACY3_+_67418110.23-P1	0.0480422	-0.0140161	0.0855374
ACY3_-_67414577.23-P2	-0.0133338	0.427208	0.335139
ACY3_-_67414607.23-P2	-0.0805363	0.234606	0.0552373
ACY3_-_67414970.23-P2	0.395535	-0.838903	0.0421913
ACY3_-_67417956.23-P1	0.229576	-1.45341
ACY3_-_67418149.23-P1	-0.0594156	0.425447	0.24989
ACYP1_+_75530659.23-P1	0.0234201	-0.865945	-0.65671
ACYP1_+_75530680.23-P1	-0.0714234	-0.156527	-0.248406
ACYP1_-_75530695.23-P1	0.0298644	0.183822	0.214446
ACYP1_-_75530711.23-P1	-0.0976557	0.0245001	-0.147909
ACYP1_-_75530721.23-P1	-0.248361	0.3019	-0.194891
ACYP1_-_75535758.23-P2	-0.119275	0.557082	0.248793
ACYP1_-_75536000.23-P2	0.0577796	-0.490376	-0.286745
ACYP1_-_75536179.23-P2	0.0585669	0.0319557	0.142315
ACYP1_-_75536183.23-P2	0.00481657	-0.422324	-0.327355
ACYP1_-_75536194.23-P2	-0.0259741	-0.0927007	-0.113494
ACYP2_+_54342830.23-P1P2	0.00851784	-0.0015471	0.023863
ACYP2_-_54342821.23-P1P2	-0.0435766	0.841699	0.619478
ACYP2_-_54343153.23-P1P2	0.00670904	-0.0492236	-0.018459
ACYP2_-_54343157.23-P1P2	-0.141699	0.543323	0.196746
ACYP2_-_54343180.23-P1P2	0.0470374	0.028414	0.118447
ADAD1_+_123300801.23-P1P2	-0.05503	0.21822	0.0882109
ADAD1_-_123300726.23-P1P2	-0.0513095	0.461608	0.294237
ADAD1_-_123300732.23-P1P2	0.0194485	-0.547462	-0.403193
ADAD1_-_123300755.23-P1P2	0.0972284	-0.130265	0.0798199
ADAD1_-_123300758.23-P1P2	0.0474644	-1.31985	-0.984593
ADAD2_+_84224814.23-P1P2	0.0438256	0.00383329	0.0924819
ADAD2_+_84225182.23-P1P2	0.0252838	-0.0899775	-0.0180421
ADAD2_-_84224806.23-P1P2	0.0795026	0.0631952	0.205966
ADAD2_-_84224870.23-P1P2	0.0162327	-0.143265	-0.0781289
ADAD2_-_84224880.23-P1P2	-0.046482	0.452895	0.295883
ADAL_-_43623106.23-P1P2	-0.0397305	-0.137361	-0.175076
ADAL_-_43623112.23-P1P2	-0.0114078	0.350266	0.275651
ADAL_-_43623116.23-P1P2	0.0686036	-0.159059	0.00418701
ADAL_-_43623128.23-P1P2	0.0359509	0.641649	0.600335
ADAL_-_43623140.23-P1P2
ADAM10_+_59041561.23-P1P2	-0.00557228	0.314147	0.256694
ADAM10_+_59041886.23-P1P2	-0.189026	-0.225368	-0.518649
ADAM10_-_59041337.23-P1P2	-0.0336223	0.267477	0.167471
ADAM10_-_59041501.23-P1P2	-0.0107503	0.137847	0.102941
ADAM10_-_59041703.23-P1P2	-0.242423	0.154901	-0.304439
ADAM11_+_42836733.23-P1P2	-0.0325719	-0.010648	-0.0583174
ADAM11_+_42836787.23-P1P2	-0.058057	-0.225596	-0.280643
ADAM11_+_42836832.23-P1P2	0.061361	-0.149692	-0.0013165
ADAM11_+_42836963.23-P1P2	0.0447409	0.256952	0.301373
ADAM11_-_42836572.23-P1P2	0.00185743	0.277813	0.240459
ADAM12_+_128076604.23-P1P2	0.0120755	0.193475	0.189996
ADAM12_+_128076607.23-P1P2	-0.00703635	-0.0761292	-0.065485
ADAM12_-_128076590.23-P1P2	0.0740388	-1.04613	-0.712168
ADAM12_-_128076617.23-P1P2	0.0438256	-1.53545	-1.16856
ADAM12_-_128077031.23-P1P2	-0.0502165	0.341133	0.197593
ADAM15_+_155023192.23-P1P2	-0.00838088	0.163856	0.128543
ADAM15_+_155023202.23-P1P2	0.0178476	0.0230955	0.0610057
ADAM15_+_155023394.23-P1P2	0.060544	-0.405704	-0.212397
ADAM15_+_155024155.23-P1P2	0.0698053	0.21164	0.30986
ADAM15_-_155024217.23-P1P2	-0.0234461	0.0416059	0.0010594
ADAM17_+_9695837.23-P1P2	-0.0371116	0.260875	0.15572
ADAM17_+_9695867.23-P1P2	0.0711383	-0.666014	-0.406243
ADAM17_+_9695885.23-P1P2	0.0695197	-1.83255	-1.36422
ADAM17_-_9695930.23-P1P2	-0.00827165	0.137572	0.107224
ADAM17_-_9695934.23-P1P2	-0.122814	-0.145953	-0.333213
ADAM18_+_39442161.23-P1P2	-0.0231257	0.1222	0.0676235
ADAM18_+_39442286.23-P1P2	-0.0183759	-0.205895	-0.192346
ADAM18_+_39442506.23-P1P2	-0.0173665	-0.191825	-0.178991
ADAM18_-_39442133.23-P1P2	-0.291738		-1.20457
ADAM18_-_39442196.23-P1P2	0.0949179	-0.412067	-0.155091
ADAM19_+_157002746.23-P1P2	0.0464405	0.0167652	0.107825
ADAM19_-_157002294.23-P1P2	0.00346132	0.0519922	0.0584989
ADAM19_-_157002314.23-P1P2	0.00923535	-0.117392	-0.0696735
ADAM19_-_157002317.23-P1P2	0.0672199	0.00860379	0.138934
ADAM19_-_157002452.23-P1P2	-0.176374	0.312864	-0.0549918
ADAM20_+_71001702.23-P1P2	0.0485179	-0.510233	-0.319846
ADAM20_-_71001316.23-P1P2	0.025011	0.0157652	0.0680325
ADAM20_-_71001647.23-P1P2	0.11606	-0.488907	-0.179548
ADAM20_-_71001696.23-P1P2	0.0392426	-0.256592	-0.129062
ADAM20_-_71001740.23-P1P2	0.00773872	-1.20094	-0.960061
ADAM21_+_70918885.23-P1P2	0.0522135	0.123611	0.205797
ADAM21_+_70919022.23-P1P2	0.0172899	0.224739	0.225075
ADAM21_+_70919032.23-P1P2	0.00437149	0.0392411	0.049715
ADAM21_-_70918928.23-P1P2	0.0256032	-0.76198	-0.567624
ADAM21_-_70919038.23-P1P2	-0.0309433	0.0801125	0.0189494
ADAM22_+_87563621.23-P1P2	0.000616019	-0.936915	-0.756286
ADAM22_+_87563949.23-P1P2	0.0840929	-0.57334	-0.306811
ADAM22_-_87563632.23-P1P2	0.0675106	-0.262578	-0.0825511
ADAM22_-_87563945.23-P1P2	-0.0740837	0.220439	0.0553748
ADAM22_-_87564057.23-P1P2	0.0131636	-1.22399	-0.968489
ADAM23_+_207308275.23-P1P2	0.0147471	-0.886064	-0.688954
ADAM23_+_207308623.23-P1P2	0.0901044	0.0687199	0.229771
ADAM23_+_207308716.23-P1P2	0.0469574	-0.363259	-0.202358
ADAM23_-_207308263.23-P1P2	0.00785817	0.320271	0.286133
ADAM23_-_207308295.23-P1P2	0.00375169	0.466186	0.398124
ADAM28_+_24151604.23-P1P2	-0.205863	0.658568	0.174401
ADAM28_+_24151615.23-P1P2	-0.258832		-0.903079
ADAM28_+_24151646.23-P1P2	0.0198331	-0.813365	-0.620187
ADAM28_+_24151656.23-P1P2	-0.00301934	-0.239664	-0.192064
ADAM28_+_24151691.23-P1P2	-0.0860776	-0.211426	-0.320004
ADAM29_+_175839595.23-P1P2	0.0116234	0.40481	0.362193
ADAM29_+_175839605.23-P1P2	-0.0827779	0.569238	0.325121
ADAM29_+_175839643.23-P1P2	-0.0857078	-0.338873	-0.42367
ADAM29_-_175839539.23-P1P2	-0.000724698	-0.535369	-0.429982
ADAM29_-_175839601.23-P1P2	-0.0134873	0.428559	0.335966
ADAM2_+_39695270.23-P1P2	-0.00776349	0.105311	0.0817362
ADAM2_-_39695260.23-P1P2	0.0507233	-0.559492	-0.356163
ADAM2_-_39695623.23-P1P2	-0.0646239	0.348385	0.177327
ADAM2_-_39695635.23-P1P2	0.0606048	0.078594	0.184204
ADAM2_-_39695737.23-P1P2	0.0435538	-0.627824	-0.425145
ADAM30_+_120439037.23-P1P2	0.0402168	0.0195531	0.0987882
ADAM30_+_120439094.23-P1P2	-0.0359384	0.201447	0.109201
ADAM30_+_120439103.23-P1P2	0.0964853	-0.870073	-0.527206
ADAM30_-_120439075.23-P1P2	-0.0544146	-1.39929	-1.23402
ADAM30_-_120439090.23-P1P2	-0.0520516	0.291294	0.153452
ADAM32_+_38965125.23-P1P2	0.107937	-0.913152	-0.541648
ADAM32_+_38965287.23-P1P2	0.0747558	-0.0530885	0.102133
ADAM32_+_38965299.23-P1P2	-0.0431957	0.110417	0.0214764
ADAM32_-_38965264.23-P1P2	0.020269	0.0284578	0.0697996
ADAM32_-_38965521.23-P1P2	0.0888508	-0.22242	-0.0108631
ADAM33_+_3662271.23-P1P2	0.0265414	0.0888038	0.130612
ADAM33_+_3662642.23-P1P2	0.0728424	-0.46383	-0.237618
ADAM33_-_3662191.23-P1P2	0.0764106	-0.00545831	0.144137
ADAM33_-_3662194.23-P1P2	-0.112201	-0.216933	-0.372022
ADAM33_-_3662638.23-P1P2	-0.114482	-0.553568	-0.651771
ADAM7_+_24298515.23-P1P2	-0.0067187	0.33714	0.273433
ADAM7_+_24298519.23-P1P2	-0.248361	0.58403	0.036086
ADAM7_+_24298600.23-P1P2	-0.0184273	0.446531	0.341696
ADAM7_-_24298558.23-P1P2	0.0888488	0.067401	0.226407
ADAM7_-_24298561.23-P1P2	-0.00472525	-0.4124	-0.336584
ADAM8_+_135090313.23-P1P2	0.0472698	0.289448	0.332576
ADAM8_-_135089929.23-P1P2	-0.0931248	0.692301	0.407054
ADAM8_-_135089932.23-P1P2	-0.00668576	-0.278995	-0.230932
ADAM8_-_135090331.23-P1P2	-0.0240222	-0.866073	-0.743098
ADAM8_-_135090373.23-P1P2	-0.0152929	-0.615845	-0.522362
ADAM9_+_38854489.23-P1P2	-0.0799572	0.24322	0.0633428
ADAM9_+_38854902.23-P1P2	-0.0340338	0.20194	0.113068
ADAM9_-_38854499.23-P1P2	0.0173763	-0.197392	-0.120363
ADAM9_-_38854525.23-P1P2	0.07374	-0.0399988	0.111002
ADAM9_-_38854669.23-P1P2	0.0956057	-0.1723	0.0424554
ADAMDEC1_+_24242051.23-P1P2	0.00915676	0.675651	0.579441
ADAMDEC1_+_24242054.23-P1P2	0.0736317	-1.66986	-1.22455
ADAMDEC1_+_24242074.23-P1P2	0.0742139	-0.158991	0.0144458
ADAMDEC1_-_24242003.23-P1P2	-0.0389898	-0.384244	-0.37585
ADAMDEC1_-_24242085.23-P1P2	-0.0166595	-0.275355	-0.246091
ADAMTS10_+_8675521.23-P1P2	0.0195352	-1.2649	-0.990392
ADAMTS10_+_8675559.23-P1P2	-0.0379963	-0.262074	-0.274023
ADAMTS10_+_8675562.23-P1P2	0.0678735	-0.0066781	0.127612
ADAMTS10_-_8675371.23-P1P2	-0.126961	0.439122	0.138242
ADAMTS10_-_8675595.23-P1P2	-0.0863303	0.3257	0.119278
ADAMTS12_+_33891838.23-P1P2	-0.0223586	0.546946	0.416755
ADAMTS12_+_33892096.23-P1P2	-0.0513956	-0.868733	-0.795059
ADAMTS12_-_33891689.23-P1P2	0.0126969	0.156584	0.160924
ADAMTS12_-_33892035.23-P1P2	-0.00773949	-0.0715431	-0.0630092
ADAMTS12_-_33892078.23-P1P2	-0.0240438	0.544539	0.411719
ADAMTS13_+_136287462.23-P1P2	0.0456562	-0.174285	-0.0500132
ADAMTS13_+_136287556.23-P1P2	0.0521378	-0.0531144	0.0609766
ADAMTS13_+_136287621.23-P1P2	-0.0798674	-0.400783	-0.463734
ADAMTS13_-_136287551.23-P1P2	0.0370268	-0.506726	-0.337874
ADAMTS13_-_136287562.23-P1P2	0.0885239	-0.549281	-0.279056
ADAMTS14_+_72432279.23-P1P2	0.0214202	0.0572733	0.0954843
ADAMTS14_+_72432594.23-P1P2	0.0497214	0.285651	0.333926
ADAMTS14_-_72432269.23-P1P2	-0.00250819	0.329841	0.275115
ADAMTS14_-_72432290.23-P1P2	-0.0785072	0.42853	0.217692
ADAMTS14_-_72432297.23-P1P2	-0.0277166	-0.125481	-0.1435
ADAMTS15_+_130318578.23-P1P2	0.063922	0.0911515	0.200518
ADAMTS15_+_130318949.23-P1P2	-0.0847418	-0.0452868	-0.181557
ADAMTS15_+_130318978.23-P1P2	-0.052345	0.0364856	-0.0556906
ADAMTS15_+_130318981.23-P1P2	0.0309863	0.250795	0.271316
ADAMTS15_-_130318977.23-P1P2	0.0147039	-0.238181	-0.158616
ADAMTS16_+_5140486.23-P2	0.000133311	-0.0152876	-0.00263514
ADAMTS16_+_5140497.23-P2	-0.0862616	-1.18817	-1.11999
ADAMTS16_+_5140517.23-P2	-0.000940888	0.652794	0.542364
ADAMTS16_+_5140760.23-P2	0.0284616	-0.0943491	-0.0158416
ADAMTS16_+_5140912.23-P2	-0.0582089	0.150134	0.0266879
ADAMTS16_+_5146334.23-P1	0.106128	0.055037	0.247711
ADAMTS16_+_5146341.23-P1	0.107033	-0.282298	-0.0268175
ADAMTS16_+_5146377.23-P1	-0.0689042	0.301021	0.130766
ADAMTS16_-_5146381.23-P1
ADAMTS16_-_5146595.23-P1	0.034507	-0.28078	-0.157476
ADAMTS17_+_100882122.23-P1P2	-0.0228824	0.0105937	-0.0233048
ADAMTS17_-_100882079.23-P1P2	-0.00662678	0.361202	0.293299
ADAMTS17_-_100882118.23-P1P2	0.0921342	0.121228	0.27645
ADAMTS17_-_100882163.23-P1P2	-0.0444949	-0.071564	-0.129873
ADAMTS17_-_100882166.23-P1P2	-0.0546405	0.273054	0.133811
ADAMTS18_+_77468466.23-P1P2	-0.0619857	-0.966206	-0.894119
ADAMTS18_+_77468714.23-P1P2	0.0745622	0.121339	0.244583
ADAMTS18_+_77468890.23-P1P2	0.0461972	-0.347968	-0.191222
ADAMTS18_-_77468494.23-P1P2	0.00188102	-0.0317618	-0.0129439
ADAMTS18_-_77468873.23-P1P2	0.0180331	-0.0116447	0.0329015
ADAMTS19_+_128796013.23-P1P2	-0.0402445	0.185462	0.0882821
ADAMTS19_+_128796021.23-P1P2	-0.0206727	0.0510442	0.0138305
ADAMTS19_-_128796009.23-P1P2	-0.027282	-0.577653	-0.512899
ADAMTS19_-_128796089.23-P1P2	0.0436692	-0.158743	-0.0409024
ADAMTS19_-_128796244.23-P1P2	0.0246167	-0.027508	0.0318878
ADAMTS1_+_28216554.23-P2	0.0793305	0.238445	0.349129
ADAMTS1_+_28216570.23-P2	-0.00560144	0.235707	0.192422
ADAMTS1_+_28216594.23-P2	-0.0238386	0.400611	0.29426
ADAMTS1_+_28217278.23-P1	-0.0963862	0.536733	0.273761
ADAMTS1_+_28217659.23-P1	0.0215519	0.134933	0.159303
ADAMTS1_+_28217664.23-P1	-0.0545349	-0.0636731	-0.141673
ADAMTS1_+_28217696.23-P1	-0.00268983	0.345059	0.287243
ADAMTS1_-_28216131.23-P2	-0.0305873	0.220729	0.134719
ADAMTS1_-_28216582.23-P2	0.0369635	0.0722995	0.136054
ADAMTS1_-_28217257.23-P1	0.00492413	-1.11093	-0.890912
ADAMTS20_+_43945551.23-P1P2	0.110211	-0.185375	0.0583132
ADAMTS20_+_43945593.23-P1P2	-0.0427619	-0.24393	-0.267836
ADAMTS20_+_43945604.23-P1P2	-0.0613217	0.236793	0.0919736
ADAMTS20_+_43945717.23-P1P2	0.0427314	-0.39129	-0.232992
ADAMTS20_-_43945984.23-P1P2	0.0552678	-1.18523	-0.860185
ADAMTS2_+_178772088.23-P1P2	0.0221445	-0.187504	-0.103596
ADAMTS2_+_178772185.23-P1P2	0.0150166	-0.0964179	-0.0419878
ADAMTS2_-_178772008.23-P1P2	0.00901155	-0.486296	-0.372099
ADAMTS2_-_178772408.23-P1P2	0.0281465	-0.23186	-0.128994
ADAMTS2_-_178772444.23-P1P2	0.0446705	-0.0164111	0.0774445
ADAMTS3_-_73434871.23-P1P2	-0.0247123	0.0901452	0.0384954
ADAMTS3_-_73434879.23-P1P2	0.0382154	-0.0240216	0.059474
ADAMTS3_-_73434891.23-P1P2	0.047659	-0.515821	-0.325983
ADAMTS3_-_73434922.23-P1P2	0.0144616	0.530261	0.47006
ADAMTS3_-_73434972.23-P1P2	-0.0219507	-0.0217956	-0.0481272
ADAMTS4_+_161168828.23-P1P2	-0.0201443	-0.583339	-0.504572
ADAMTS4_-_161168418.23-P1P2	-0.0290685	0.318168	0.217253
ADAMTS4_-_161168458.23-P1P2	0.00998107	0.127678	0.132319
ADAMTS4_-_161168616.23-P1P2	-0.0489841	-0.278995	-0.307859
ADAMTS4_-_161168836.23-P1P2	-0.0677952	-0.190506	-0.269626
ADAMTS5_+_28339356.23-P1P2	-0.0750071	-0.030599	-0.151828
ADAMTS5_+_28339363.23-P1P2	-0.00456382	0.32255	0.265407
ADAMTS5_-_28338950.23-P1P2	-0.0195527	0.18576	0.126158
ADAMTS5_-_28339372.23-P1P2	-0.0169848	-0.736036	-0.623838
ADAMTS5_-_28339421.23-P1P2	0.056917	-0.427738	-0.237033
ADAMTS6_+_64777310.23-P1P2	-0.0776579	0.406504	0.201204
ADAMTS6_+_64777340.23-P1P2	0.0408975	0.164123	0.218384
ADAMTS6_+_64777661.23-P1P2	0.055614	-0.00166778	0.109417
ADAMTS6_-_64777602.23-P1P2	0.0356955	-0.643263	-0.452076
ADAMTS6_-_64777679.23-P1P2	-0.100632	-0.381615	-0.485806
ADAMTS7_+_79103687.23-P1P2	0.0300585	-1.26278	-0.969524
ADAMTS7_-_79103352.23-P1P2	0.0771108	0.369065	0.45203
ADAMTS7_-_79103383.23-P1P2	0.0396487	-1.45341	-1.10913
ADAMTS7_-_79103411.23-P1P2	-0.0418644	-0.143946	-0.184347
ADAMTS7_-_79103729.23-P1P2	-0.0107222	-0.646513	-0.539157
ADAMTS8_+_130298490.23-P1P2	-0.0560845	0.340099	0.186074
ADAMTS8_-_130297973.23-P1P2	-0.112881	0.513855	0.225031
ADAMTS8_-_130298054.23-P1P2	0.0564522	-0.594531	-0.37443
ADAMTS8_-_130298160.23-P1P2	0.0476824	0.0623619	0.147413
ADAMTS8_-_130298510.23-P1P2	0.0278767	0.3447	0.34254
ADAMTS9_+_64673234.23-P1P2	-0.0630619	0.0612855	-0.0548779
ADAMTS9_-_64673170.23-P1P2	0.0939734	-0.0276411	0.157917
ADAMTS9_-_64673267.23-P1P2	-0.0334551	-0.649565	-0.583
ADAMTS9_-_64673280.23-P1P2	0.0504032	-0.37195	-0.203206
ADAMTS9_-_64673627.23-P1P2	-0.14002	0.161836	-0.112521
ADAMTSL1_+_18474148.23-P1P2	0.0461933	-0.0357025	0.0644203
ADAMTSL1_+_18474201.23-P1P2	-0.0772745	0.683258	0.428477
ADAMTSL1_+_18474327.23-P1P2	0.0644585	-0.0772799	0.0636
ADAMTSL1_-_18474157.23-P1P2	-0.0528731	0.0232143	-0.0675162
ADAMTSL1_-_18474595.23-P1P2	-0.065817	0.460351	0.266823
ADAMTSL2_+_136399841.23-P1P2	0.0502464	0.275976	0.32696
ADAMTSL2_+_136400219.23-P1P2	0.036975	-0.425834	-0.271743
ADAMTSL2_+_136400253.23-P1P2	-0.0587515	-0.179333	-0.244031
ADAMTSL2_-_136399802.23-P1P2	-0.0680029	-1.2598	-1.14375
ADAMTSL2_-_136399861.23-P1P2		1.62872	0.496176
ADAMTSL3_+_84322918.23-P1P2	0.0902632	-0.83184	-0.507222
ADAMTSL3_-_84322944.23-P1P2	0.0576532	-0.0547704	0.0696516
ADAMTSL3_-_84322947.23-P1P2	0.00350524	0.609748	0.515209
ADAMTSL3_-_84323067.23-P1P2	-0.0857078	0.0601438	-0.0969986
ADAMTSL3_-_84323104.23-P1P2	-0.128045	0.808614	0.438769
ADAMTSL4_+_150521897.23-P1P2	0.047231	-1.16624	-0.859254
ADAMTSL4_+_150521916.23-P1P2	-0.0771717	-0.918259	-0.882484
ADAMTSL4_+_150521953.23-P1P2	0.0686514	-0.0438926	0.0985595
ADAMTSL4_+_150522285.23-P1P2	-0.00940369	-0.1571	-0.136081
ADAMTSL4_-_150521934.23-P1P2	0.121028	-0.0605173	0.180206
ADAMTSL5_-_1512942.23-P1P2	-0.0565065	-0.174689	-0.236146
ADAMTSL5_-_1512947.23-P1P2	-0.019128	0.486921	0.373488
ADAMTSL5_-_1512963.23-P1P2	-0.0295741	0.529531	0.389375
ADAMTSL5_-_1512979.23-P1P2	0.0228513	0.164407	0.185796
ADAMTSL5_-_1513012.23-P1P2	-0.0624963	-0.570564	-0.571139
ADAP1_+_994248.23-P1P2	-0.178942	0.423642	0.0310299
ADAP1_+_994276.23-P1P2	-0.084188	0.471454	0.242501
ADAP1_+_994279.23-P1P2	-0.0315448	0.280313	0.181758
ADAP1_+_994282.23-P1P2	-0.00782829	0.247479	0.19801
ADAP1_-_993847.23-P1P2	0.037032	0.537824	0.5173
ADAP2_+_29249325.23-P1P2	0.0540554	0.112433	0.199996
ADAP2_+_29249375.23-P1P2	0.0253756	-0.476581	-0.334384
ADAP2_+_29249417.23-P1P2	0.0368709	-0.731547	-0.522216
ADAP2_-_29249001.23-P1P2	-0.00423915	-0.177359	-0.143274
ADAP2_-_29249406.23-P1P2	0.0267727	-0.308442	-0.194189
ADARB1_+_46493796.23-P1P2	-0.00606407	0.246744	0.200617
ADARB1_+_46494884.23-P1P2	0.0544006	-0.236913	-0.0853826
ADARB1_+_46494897.23-P1P2	-0.0195316	-0.087193	-0.0972678
ADARB1_-_46493823.23-P1P2	0.00384389	0.266444	0.234765
ADARB1_-_46493831.23-P1P2	-0.0395204	0.385008	0.252966
ADARB2_+_1779243.23-ENST00000381312.1	-0.025769	-0.163189	-0.170829
ADARB2_+_1779248.23-ENST00000381312.1	0.00585304	0.290405	0.258035
ADARB2_+_1779269.23-ENST00000381312.1	-0.0143244	-0.448397	-0.383513
ADARB2_+_1779687.23-ENST00000381312.1	0.0532057	-1.08778	-0.784153
ADARB2_-_1779460.23-ENST00000381312.1	-0.0103159	-0.159887	-0.140022
ADAR_+_154580643.23-P1	-0.106151	0.13561	-0.0723954
ADAR_+_154600408.23-P2	-0.0103129	-0.0611911	-0.0592143
ADAR_+_154600411.23-P2	-0.015224	-0.0303359	-0.0428852
ADAR_+_154600419.23-P2	0.0629639	0.270396	0.345521
ADAR_-_154580605.23-P1	-0.299492	0.566152	-0.0715407
ADAR_-_154580611.23-P1	0.00498716	-0.634015	-0.500354
ADAR_-_154580629.23-P1	-0.12334	-1.35754	-1.32409
ADAR_-_154580652.23-P1	-0.179747	-0.0959125	-0.395788
ADAR_-_154599983.23-P2	0.0406539	-0.496218	-0.322674
ADAR_-_154600448.23-P2	-0.0351526	0.25519	0.154628
ADAT1_+_75656919.23-P1P2	-0.071757	0.396045	0.203373
ADAT1_+_75657125.23-P1P2	-0.00895729	-0.737895	-0.610761
ADAT1_+_75657171.23-P1P2	0.0148701	0.249952	0.241316
ADAT1_-_75656724.23-P1P2	0.00187457	-0.0691441	-0.0435602
ADAT1_-_75656732.23-P1P2	-0.00273195	-0.797136	-0.647939
ADAT2_+_143771740.23-P1P2	-0.573748		-0.984593
ADAT2_+_143771779.23-P1P2	-0.0596179	0.16857	0.0392189
ADAT2_+_143771782.23-P1P2	-0.0470811	-1.42565	-1.24316
ADAT2_-_143771413.23-P1P2	-0.00798556	-0.42332	-0.351453
ADAT2_-_143771826.23-P1P2	-0.183012	-0.453082	-0.694137
ADAT3_+_1905424.23-P1	0.0826495	-0.104114	0.0747153
ADAT3_+_1905431.23-P1	0.0511308	0.00452207	0.106332
ADAT3_+_1905450.23-P1	0.0368412	0.130635	0.183591
ADAT3_+_1907955.23-P2	-0.0282356	0.0456631	-0.00432952
ADAT3_+_1908001.23-P2	-0.0472293	0.379901	0.234765
ADAT3_-_1905405.23-P1	-0.116054	-0.0926659	-0.277292
ADAT3_-_1905438.23-P1	-0.0522156	-0.637324	-0.607098
ADAT3_-_1908013.23-P2	0.139769	-1.52757	-0.990392
ADAT3_-_1908397.23-P2	-0.0361547	0.22384	0.12714
ADAT3_-_1908429.23-P2	0.0874729	0.0671274	0.223681
ADA_+_43280282.23-P1P2	-0.0292459	0.567177	0.420792
ADA_+_43280285.23-P1P2	-0.00794493	-0.211549	-0.178005
ADA_+_43280303.23-P1P2	0.00624212	0.259529	0.233465
ADA_+_43280315.23-P1P2	-0.0254067	-0.932042	-0.799624
ADA_-_43279996.23-P1P2	-0.108839	-0.291584	-0.427024
ADCK1_+_78266506.23-P1P2	0.000589195	-0.176643	-0.133906
ADCK1_-_78266512.23-P1P2	0.11834	0.124828	0.327058
ADCK1_-_78266523.23-P1P2	0.0292858	0.719319	0.651801
ADCK1_-_78266828.23-P1P2	0.0134649	0.174952	0.177359
ADCK1_-_78266900.23-P1P2	-0.0240951	0.110106	0.0559596
ADCK2_+_140372748.23-P1P2	0.119236	0.0688697	0.282875
ADCK2_+_140373084.23-P1P2	0.0598194	0.144315	0.236581
ADCK2_+_140373152.23-P1P2	0.0638212	-0.271021	-0.0961733
ADCK2_-_140373160.23-P1P2	0.015479	0.160854	0.16948
ADCK2_-_140373404.23-P1P2	-0.0138855	0.37169	0.288684
ADCK3_+_227128242.23-P1P2	-0.0758824	-0.289289	-0.365207
ADCK3_+_227128400.23-P1P2	-0.0422248	0.564387	0.394904
ADCK3_-_227128046.23-P1P2	-0.0134501	-0.791866	-0.663118
ADCK3_-_227128055.23-P1P2	0.044397	-0.0512125	0.0484555
ADCK3_-_227128078.23-P1P2	-0.00441962	-0.644756	-0.526256
ADCK4_+_41222752.23-P1P2	-0.195769	-1.12923	-1.2709
ADCK4_-_41222351.23-P1P2	0.0100334	-1.38731	-1.10789
ADCK4_-_41222709.23-P1P2	0.0918717	0.246915	0.378872
ADCK4_-_41222769.23-P1P2	0.148514	-0.163971	0.145498
ADCK4_-_41222791.23-P1P2	-0.016096	-0.0973128	-0.0993046
ADCK5_+_145597793.23-P1P2	-0.165107	-1.28012	-1.33867
ADCK5_-_145597191.23-P1P2	0.0977161	-0.434162	-0.168091
ADCK5_-_145597250.23-P1P2	-0.0625041	-1.558	-1.37956
ADCK5_-_145597781.23-P1P2	-0.0456394	0.267196	0.145386
ADCK5_-_145597789.23-P1P2	-0.0441486	0.157246	0.0580811
ADCY10_+_167883329.23-P1P2	-0.00649075	-0.100606	-0.0845314
ADCY10_-_167882907.23-P1P2	0.0667796	-0.172529	-0.0101587
ADCY10_-_167882911.23-P1P2	0.0979621	-0.144153	0.0697847
ADCY10_-_167882918.23-P1P2	0.0700387	-0.408723	-0.197601
ADCY10_-_167883077.23-P1P2	-0.029075	0.119395	0.0545075
ADCY1_+_45614267.23-P1P2	0.0310899	0.683405	0.625679
ADCY1_+_45614427.23-P1P2	0.00376658	-0.0999294	-0.0653228
ADCY1_+_45614650.23-P1P2	0.0418685	-0.0369251	0.055554
ADCY1_+_45614673.23-P1P2	-0.0557375	0.21327	0.0828713
ADCY1_-_45614627.23-P1P2	-0.17784	0.554202	0.139923
ADCY2_+_7396541.23-P1P2	0.0147471	-0.286397	-0.198012
ADCY2_+_7396596.23-P1P2	-0.0899996	-0.0105604	-0.162689
ADCY2_+_7396661.23-P1P2	-0.0993463	0.189414	-0.0159707
ADCY2_-_7396414.23-P1P2	-0.252575		-1.23633
ADCY2_-_7396575.23-P1P2	0.0104951	-0.00851029	0.0217584
ADCY3_+_25142736.23-P1P2	0.0563129	0.0969224	0.191404
ADCY3_-_25142720.23-P1P2	0.0552859	-1.35125	-0.996069
ADCY3_-_25142849.23-P1P2	-0.0388009	-0.946566	-0.835875
ADCY3_-_25143044.23-P1P2	0.0267871	-0.100995	-0.0243278
ADCY3_-_25143049.23-P1P2	-0.026151	-0.640517	-0.562308
ADCY4_+_24803901.23-P1P2	-0.0280707	0.180251	0.106156
ADCY4_-_24804056.23-P1P2	-0.0157225	0.365733	0.280466
ADCY4_-_24804217.23-P1P2	-0.0742775	-0.526785	-0.556724
ADCY4_-_24804227.23-P1P2	0.0261724	-1.04898	-0.801557
ADCY4_-_24804232.23-P1P2	-0.0179322	0.274436	0.201703
ADCY5_+_123168382.23-P1P2	-0.151872	-0.376904	-0.575139
ADCY5_+_123168593.23-P1P2	0.164246	0.201053	0.47295
ADCY5_+_123168613.23-P1P2	0.121871	0.145976	0.350792
ADCY5_-_123168354.23-P1P2	-0.0112672	0.0254399	0.0099742
ADCY5_-_123168357.23-P1P2	-0.0070176	0.321774	0.260309
ADCY6_+_49182403.23-P1P2	-0.629506		-1.08194
ADCY6_+_49182840.23-P1P2	-0.141293	0.0482514	-0.207827
ADCY6_-_49182447.23-P1P2	-0.028788	0.343756	0.238712
ADCY6_-_49182451.23-P1P2	0.0307342	0.384341	0.380191
ADCY6_-_49182454.23-P1P2	0.072234	-0.733931	-0.459853
ADCY7_+_50300487.23-P1P2	-0.0161671	0.179311	0.127036
ADCY7_-_50300493.23-P1P2	0.0469539	-0.19764	-0.0667737
ADCY7_-_50300498.23-P1P2	0.0299012	0.355816	0.355323
ADCY7_-_50300519.23-P1P2	-0.0435681	0.665495	0.475236
ADCY7_-_50300524.23-P1P2	-0.0125683	0.831465	0.667494
ADCY8_+_132052698.23-P1P2	0.0357833	0.124888	0.176962
ADCY8_+_132053037.23-P1P2	-0.0135165	0.44284	0.347606
ADCY8_-_132052844.23-P1P2	-0.0468226	0.269299	0.144955
ADCY8_-_132053083.23-P1P2	-0.0723441	0.41799	0.220272
ADCY8_-_132053093.23-P1P2	0.00987068	0.124462	0.129486
ADCY9_+_4166382.23-P1P2	0.00404936	-1.42925	-1.15332
ADCY9_+_4166432.23-P1P2	0.0951743	-0.0255889	0.161782
ADCY9_-_4166007.23-P1P2	0.0163123	0.470024	0.42411
ADCY9_-_4166218.23-P1P2	0.0234074	-0.0805545	-0.0137402
ADCY9_-_4166392.23-P1P2	-0.0301612	0.206367	0.123735
ADCYAP1R1_+_31092317.23-P1P2	-0.0424091	-0.743018	-0.675793
ADCYAP1R1_+_31092343.23-P1P2	0.0206208	0.179173	0.193828
ADCYAP1R1_+_31092380.23-P1P2	-0.176975	0.317971	-0.0519048
ADCYAP1R1_+_31092421.23-P1P2
ADCYAP1R1_-_31092299.23-P1P2	-0.0883077	0.0456312	-0.113608
ADCYAP1_+_904729.23-P1P2	-0.127793	-0.789734	-0.869327
ADCYAP1_+_904799.23-P1P2	-0.036672	-0.111466	-0.148314
ADCYAP1_+_904824.23-P1P2	-0.0453583	-0.469977	-0.457621
ADCYAP1_+_904967.23-P1P2	-0.0461586	0.0525365	-0.0312988
ADCYAP1_-_904647.23-P1P2	-0.0438577	0.132934	0.0387068
ADC_+_33546832.23-P1P2	-0.0257832	-0.426171	-0.386156
ADC_+_33546850.23-P1P2	0.0335715	0.00613415	0.0757164
ADC_+_33546977.23-P1P2	-0.0563811	-0.812459	-0.758055
ADC_-_33546826.23-P1P2	0.0288414	-0.801178	-0.593826
ADC_-_33546829.23-P1P2	0.0372028	0.295495	0.319218
ADD1_+_2846015.23-P1P2	-0.0403734	0.332193	0.208175
ADD1_-_2845596.23-P1P2	-0.0369144	0.240284	0.139221
ADD1_-_2845605.23-P1P2	0.111403	-1.479	-1.00163
ADD1_-_2845697.23-P1P2	-0.0699375	0.32725	0.15036
ADD1_-_2845997.23-P1P2	0.0163371	-0.139102	-0.0745311
ADD2_+_70995010.23-P1P2	-0.0605877	0.27348	0.123344
ADD2_+_70995142.23-P1P2	-0.0181473	-0.420091	-0.367291
ADD2_+_70995263.23-P1P2	-0.0269441	-0.503789	-0.451813
ADD2_+_70995300.23-P1P2	0.0687602	-0.21115	-0.0381748
ADD2_-_70994876.23-P1P2	-0.0148134	-0.281068	-0.247411
ADD3_+_111767932.23-P1P2	-0.0433272	-0.0389194	-0.101023
ADD3_+_111768327.23-P1P2	-0.0685186	0.164833	0.0199715
ADD3_-_111767767.23-P1P2	-0.165569	0.0764801	-0.228867
ADD3_-_111767783.23-P1P2	0.00172448	0.110818	0.1035
ADD3_-_111767791.23-P1P2	0.11388	-0.136357	0.105117
ADGB_+_146920153.23-P1P2	-0.0362229	0.0500855	-0.0152355
ADGB_+_146920457.23-P1P2	-0.155156	0.265729	-0.0549918
ADGB_+_146920504.23-P1P2	0.0394157	-0.885737	-0.643822
ADGB_-_146920345.23-P1P2	0.158585	-1.40704	-0.860185
ADGB_-_146920535.23-P1P2	0.0678124	-0.305916	-0.117483
ADH1A_+_100212126.23-P1P2	-0.0105918	0.279394	0.219113
ADH1A_-_100211701.23-P1P2	0.0386028	-0.000721163	0.0792544
ADH1A_-_100211816.23-P1P2	-0.0108995	0.165202	0.125065
ADH1A_-_100212118.23-P1P2	0.0553419	0.00193476	0.111872
ADH1A_-_100212162.23-P1P2	-0.00569841	-0.114393	-0.0943776
ADH1B_+_100242040.23-P1P2	-0.00606407	-0.712929	-0.585059
ADH1B_+_100242511.23-P1P2	-0.0290137	0.276637	0.183351
ADH1B_-_100242120.23-P1P2	0.119945	-1.54817	-1.04241
ADH1B_-_100242280.23-P1P2	0.114869	-1.25069	-0.805382
ADH1B_-_100242333.23-P1P2	0.00314839	0.00403501	0.0186677
ADH1C_+_100273655.23-P1P2	-0.0416705	-1.34391	-1.16558
ADH1C_-_100273471.23-P1P2	0.0509981	-0.21742	-0.0756117
ADH1C_-_100273518.23-P1P2	-0.0135732	-0.392227	-0.33616
ADH1C_-_100273879.23-P1P2	0.0133457	-1.61765	-1.29044
ADH1C_-_100273923.23-P1P2	-0.0374935	0.361038	0.237028
ADH4_+_100065429.23-P1P2	0.0257572	0.0790848	0.121229
ADH4_+_100065433.23-P1P2	0.0349222	0.312997	0.329399
ADH4_+_100065444.23-P1P2	0.0429018	-0.947856	-0.688338
ADH4_+_100065450.23-P1P2
ADH4_-_100065227.23-P1P2	-0.283602	0.422007	-0.160652
ADH5_+_100009684.23-P1P2	0.098966	0.0302385	0.214383
ADH5_+_100009798.23-P1P2	-0.0406404	0.0567998	-0.0177726
ADH5_+_100009821.23-P1P2	-0.0405828	-0.742727	-0.672234
ADH5_+_100009838.23-P1P2	-0.0192437	0.204348	0.141938
ADH5_-_100009831.23-P1P2	0.0470156	0.250036	0.299848
ADH6_+_100140186.23-P1P2	-0.221061	0.593713	0.0936642
ADH6_+_100140286.23-P1P2	-0.0505024	-0.0357963	-0.111516
ADH6_-_100140386.23-P1P2	0.0204906	-0.197588	-0.114859
ADH6_-_100140394.23-P1P2	-0.0431095	-0.0031872	-0.071374
ADH6_-_100140413.23-P1P2	-0.04974	-0.0892525	-0.153894
ADH7_+_100355983.23-P1P2	0.0595223	-0.542175	-0.325983
ADH7_+_100356142.23-P1P2	0.0857874	0.159403	0.296161
ADH7_+_100356385.23-P1P2	-0.000514748	0.305484	0.258799
ADH7_+_100356481.23-P1P2	0.032767	0.206234	0.238073
ADH7_-_100356092.23-P1P2	0.000437976	-0.231498	-0.17909
ADHFE1_+_67344685.23-P1P2	0.0913185	-0.509754	-0.241613
ADHFE1_+_67344765.23-P1P2	0.0350388	0.341204	0.352704
ADHFE1_-_67344732.23-P1P2	0.00728437	-0.723201	-0.569192
ADHFE1_-_67344792.23-P1P2	-0.088807	0.0258418	-0.130718
ADHFE1_-_67345102.23-P1P2	-0.0866182	0.157859	-0.0186555
ADI1_+_3523254.23-P1P2	-0.076911	0.362682	0.166686
ADI1_+_3523275.23-P1P2	0.135769	-0.944407	-0.516618
ADI1_-_3523067.23-P1P2	-0.0520516	0.357431	0.207598
ADI1_-_3523293.23-P1P2	0.0430317	-0.0745165	0.0268936
ADI1_-_3523313.23-P1P2	0.0284974	0.191516	0.218258
ADIG_+_37209880.23-P1P2	-0.0339722	-0.194531	-0.211408
ADIG_+_37209891.23-P1P2	-0.0123745	0.171483	0.127524
ADIG_+_37209902.23-P1P2	0.083105	-0.720402	-0.429006
ADIG_+_37209911.23-P1P2	-0.0699648	0.42079	0.226891
ADIG_+_37210368.23-P1P2	0.0361835	-1.52222	-1.17151
ADIPOQ_+_186560448.23-P1P2	0.0410713	-0.014645	0.0723445
ADIPOQ_+_186560496.23-P1P2	0.116382	-0.173196	0.0795068
ADIPOQ_+_186560526.23-P1P2	0.0414532	-1.30453	-0.984593
ADIPOQ_-_186560537.23-P1P2	-0.0108838	0.233298	0.180843
ADIPOQ_-_186560924.23-P1P2	0.0926259	0.278649	0.406224
ADIPOR1_+_202926923.23-P1P2	-0.11931	-0.601528	-0.699815
ADIPOR1_+_202926993.23-P1P2	0.0115983	0.248224	0.233951
ADIPOR1_+_202927394.23-P1P2	-0.0202357	-0.000493228	-0.0275681
ADIPOR1_-_202926990.23-P1P2	0.11194	-0.100579	0.13088
ADIPOR1_-_202927375.23-P1P2	0.0384899	0.377185	0.388438
ADIPOR2_+_1800595.23-P1P2	0.0303212	0.401232	0.393269
ADIPOR2_-_1800242.23-P1P2	-0.0307168	0.0744431	0.0147198
ADIPOR2_-_1800250.23-P1P2	-0.0930206	0.00476244	-0.155639
ADIPOR2_-_1800256.23-P1P2	0.00450913	0.334431	0.291635
ADIPOR2_-_1800278.23-P1P2	-0.0593764	0.294728	0.142943
ADIRF_+_88728033.23-P1P2	-0.0441769	-0.0308492	-0.0959619
ADIRF_-_88728314.23-P1P2	-0.049541	0.406181	0.252075
ADIRF_-_88728503.23-P1P2	0.124025	0.00905779	0.242617
ADIRF_-_88728567.23-P1P2	-0.0915449	-0.142035	-0.273136
ADIRF_-_88728681.23-P1P2	0.0597476	-0.074266	0.0574998
ADK_+_75911404.23-P2	0.00459977	0.0838831	0.0866783
ADK_+_75911444.23-P2	-0.106368	-0.47271	-0.570816
ADK_+_75936517.23-P1	-0.0416967	0.117157	0.0297207
ADK_+_75936538.23-P1	0.0224158	-0.17138	-0.0899018
ADK_+_75936570.23-P1	0.0877219	0.216588	0.346496
ADK_+_75936748.23-P1	-0.268962	1.21689	0.516741
ADK_-_75911021.23-P2	0.0195084	-0.122557	-0.0552185
ADK_-_75911025.23-P2	0.0587091	-0.345174	-0.166179
ADK_-_75911437.23-P2	-0.0272161	-0.0106223	-0.0485559
ADK_-_75936578.23-P1	0.0020011	0.272069	0.236018
ADM2_+_50920011.23-P1P2	0.0388044	0.0898695	0.153787
ADM2_+_50920227.23-P1P2	0.120508	0.219887	0.408824
ADM2_+_50920298.23-P1P2	-0.0122754	0.0287503	0.0108508
ADM2_+_50920473.23-P1P2	0.00399218	0.279699	0.245886
ADM2_-_50920028.23-P1P2	0.208475	-1.66289	-0.972606
ADM5_+_50191684.23-P1P2
ADM5_+_50191838.23-P1P2	0.025996	-0.198829	-0.105863
ADM5_+_50191862.23-P1P2	0.190436	-0.784705	-0.286449
ADM5_+_50191867.23-P1P2	0.0563905	-0.46487	-0.26839
ADM5_-_50191704.23-P1P2	0.00831725	-0.511203	-0.393753
ADM_+_10326660.23-P1P2	-0.0133457	0.299326	0.230422
ADM_+_10327266.23-P1P2	-0.0225122	-0.230807	-0.220264
ADM_+_10327276.23-P1P2	0.00847225	0.305317	0.275007
ADM_+_10327290.23-P1P2	0.0313515	-0.211136	-0.106198
ADM_-_10327037.23-P1P2	-0.0891991	-0.207582	-0.322533
ADNP2_+_77867421.23-P1P2	0.0571253	-0.30172	-0.133484
ADNP2_+_77867603.23-P1P2	-0.0157225	0.169287	0.119638
ADNP2_-_77867208.23-P1P2	0.00663631	-0.0976301	-0.0582213
ADNP2_-_77867536.23-P1P2	-0.00677521	0.33075	0.268099
ADNP2_-_77867623.23-P1P2	0.07441	0.0364627	0.174819
ADNP_+_49547892.23-P1P2	-0.00302247	0.28255	0.235462
ADNP_-_49547603.23-P1P2	0.00414099	0.112944	0.109635
ADNP_-_49547651.23-P1P2	-0.0446221	-0.0421284	-0.106006
ADNP_-_49547707.23-P1P2	-0.0769438	0.537131	0.309446
ADNP_-_49547964.23-P1P2	-0.00418002	-0.0280258	-0.0209083
ADORA1_+_203096891.23-P1P2	-0.0433272	-0.225876	-0.254083
ADORA1_+_203097450.23-P1P2	0.0358225	-0.504237	-0.338026
ADORA1_+_203097472.23-P1P2	-0.0112412	0.0464887	0.0272539
ADORA1_+_203097506.23-P1P2	-0.118109	-0.178967	-0.351685
ADORA1_-_203096974.23-P1P2	-0.183856	0.730183	0.273056
ADORA2A_+_24820308.23-P1P2	0.0169901	0.115219	0.134867
ADORA2A_-_24819888.23-P1P2	0.0533814	0.00113902	0.107655
ADORA2A_-_24819903.23-P1P2	-0.0805107	0.465194	0.244064
ADORA2A_-_24819947.23-P1P2	0.00675762	0.141729	0.137961
ADORA2A_-_24820281.23-P1P2	0.0404428	0.0845536	0.152415
ADORA2B_+_15848686.23-P1P2	0.00303528	0.22604	0.200215
ADORA2B_+_15848965.23-P1P2	-0.181396	-0.853098	-1.01869
ADORA2B_-_15848659.23-P1P2	0.0197502	-0.287976	-0.190205
ADORA2B_-_15848791.23-P1P2	0.21844	-1.23493
ADORA2B_-_15848949.23-P1P2	0.0385672	-0.194135	-0.0791568
ADORA3_+_112031013.23-P1	0.0686514	0.407192	0.467859
ADORA3_+_112031386.23-P1	-0.0419479	0.132071	0.0414735
ADORA3_+_112031407.23-P1	-0.1125	0.237336	-0.000659585
ADORA3_+_112031411.23-P1	-0.0352309	-0.00627202	-0.0595707
ADORA3_+_112031418.23-P1	-0.0254014	0.428498	0.314249
ADORA3_+_112045890.23-P2	0.138065	-0.0148842	0.248549
ADORA3_+_112046055.23-P2	-0.0743905	-1.17098	-1.08194
ADORA3_+_112046115.23-P2	0.074385	0.240923	0.342163
ADORA3_+_112046284.23-P2	-0.0992697	0.143379	-0.0535191
ADORA3_-_112046251.23-P2	-0.0901506	-0.77615	-0.789745
ADO_+_64565053.23-P1P2	-0.0194081	-0.0104148	-0.0341856
ADO_+_64565065.23-P1P2	-0.0377691	-0.711642	-0.641668
ADO_-_64564623.23-P1P2	-0.0704202	0.0718668	-0.0595976
ADO_-_64564781.23-P1P2	-0.243509	0.613165	0.0687634
ADO_-_64565135.23-P1P2	-0.00455107	0.13062	0.108299
ADPGK_+_73075721.23-P1P2	-0.122661	0.247165	-0.0110921
ADPGK_+_73076060.23-P1P2	0.0519142	0.0565308	0.150336
ADPGK_+_73076066.23-P1P2	0.059338	-0.443612	-0.245626
ADPGK_+_73076082.23-P1P2
ADPGK_-_73075645.23-P1P2	-0.019401	0.02328	-0.00658694
ADPRHL1_+_114103395.23-P2	0.0329936	-0.045183	0.0326525
ADPRHL1_+_114107397.23-P1	0.0373907	-0.38602	-0.238391
ADPRHL1_+_114107429.23-P1	-0.0268172	0.179477	0.107802
ADPRHL1_+_114107533.23-P1	-0.0878715	0.359775	0.144372
ADPRHL1_+_114107537.23-P1	-0.0193263	-0.0457138	-0.0629359
ADPRHL1_+_114107772.23-P1	0.0869617	-0.697223	-0.403016
ADPRHL1_-_114103032.23-P2	-0.0685186	0.296205	0.127524
ADPRHL1_-_114103049.23-P2	-0.0920354	-0.168167	-0.295422
ADPRHL1_-_114103424.23-P2	0.0158263	0.108139	0.126954
ADPRHL1_-_114103435.23-P2	-0.0269494	0.612731	0.462263
ADPRHL2_+_36554555.23-P1P2	-0.0729664	-0.153099	-0.248406
ADPRHL2_+_36554875.23-P1P2	0.0255504	-0.944315	-0.716997
ADPRHL2_+_36554891.23-P1P2	0.0197878	-1.53284	-1.20971
ADPRHL2_+_36554907.23-P1P2	0.0141864	0.209656	0.207083
ADPRHL2_-_36554711.23-P1P2	0.109489	-0.231256	0.019437
ADPRH_+_119298367.23-P1P2	-0.093765	-0.0573387	-0.207834
ADPRH_+_119298491.23-P1P2	-0.0135461	-0.0880371	-0.0870731
ADPRH_+_119298604.23-P1P2	0.0404428	0.532232	0.518925
ADPRH_+_119298662.23-P1P2	0.0582032	-0.988931	-0.694137
ADPRH_+_119298740.23-P1P2	0.0806657	0.376677	0.464727
ADPRM_+_10600917.23-P1P2	-0.0842279	0.404772	0.187837
ADPRM_+_10600945.23-P1P2	0.00364453	0.4102	0.352094
ADPRM_+_10600958.23-P1P2	0.132469	-1.04898
ADPRM_-_10600957.23-P1P2	0.0171769	-0.187496	-0.112624
ADPRM_-_10600988.23-P1P2	-0.0312237	0.10243	0.0367107
ADRA1A_+_26724406.23-P1P2	-0.0209716	-0.0921431	-0.103939
ADRA1A_-_26724311.23-P1P2	0.0329936	-0.570564	-0.397473
ADRA1A_-_26724340.23-P1P2	-0.0262791	-1.42201	-1.20196
ADRA1A_-_26724356.23-P1P2	-0.0173307	-0.516446	-0.444691
ADRA1A_-_26724373.23-P1P2	-0.046539	-1.03029	-0.918492
ADRA1B_+_159343520.23-P1P2	0.0235384	0.330378	0.322925
ADRA1B_+_159344209.23-P1P2	0.114922	-0.183411	0.0684888
ADRA1B_+_159344222.23-P1P2	-0.103812	0.360487	0.115963
ADRA1B_-_159343504.23-P1P2	-0.0636831	-0.830741	-0.786302
ADRA1B_-_159343900.23-P1P2	-0.0604957	-0.29645	-0.343085
ADRA1D_+_4229485.23-P1P2	-0.00702067	-0.514417	-0.424279
ADRA1D_-_4229164.23-P1P2	-0.0353786	0.437956	0.303847
ADRA1D_-_4229250.23-P1P2	0.0235039	-0.0364798	0.0225189
ADRA1D_-_4229495.23-P1P2	0.0329936	-0.142176	-0.0467546
ADRA1D_-_4229926.23-P1P2	-0.0484762	0.0224263	-0.0601648
ADRA2A_-_112837142.23-P1P2	-0.0444939	0.125691	0.0316199
ADRA2A_-_112837201.23-P1P2	-0.0347313	0.0255412	-0.0326168
ADRA2A_-_112837216.23-P1P2	-0.00606407	0.202036	0.164015
ADRA2A_-_112837238.23-P1P2	0.022428	0.427339	0.400286
ADRA2A_-_112837251.23-P1P2	-0.110962	0.696537	0.378081
ADRA2B_+_96781839.23-P1P2	0.0149079	-0.496276	-0.369545
ADRA2B_-_96781873.23-P1P2	-0.26816	0.226513	-0.292618
ADRA2B_-_96781894.23-P1P2	0.0708879	-0.446717	-0.227162
ADRA2B_-_96782243.23-P1P2	-0.117261	-0.0112238	-0.212811
ADRA2B_-_96782246.23-P1P2	-0.108839	0.428799	0.162748
ADRA2C_+_3768074.23-P1P2	0.0106762	0.479905	0.421949
ADRA2C_+_3768082.23-P1P2	0.0386118	-0.0305117	0.0548815
ADRA2C_+_3768098.23-P1P2	0.0531458	-0.952962	-0.673888
ADRA2C_-_3767700.23-P1P2	0.0696775	-0.310504	-0.117847
ADRA2C_-_3767888.23-P1P2	-0.0947335	0.0827907	-0.0948726
ADRB1_+_115804002.23-P1P2	0.106599	-0.29645	-0.0391911
ADRB1_-_115803895.23-P1P2	0.0375845	-0.106213	-0.00896284
ADRB1_-_115804061.23-P1P2	0.0640476	-0.211686	-0.0471846
ADRB1_-_115804069.23-P1P2	0.0363699	0.230022	0.264101
ADRB1_-_115804075.23-P1P2	-0.108429	-0.0752341	-0.249154
ADRB2_+_148206220.23-P1P2	0.0756767	0.00711671	0.153097
ADRB2_+_148206227.23-P1P2	0.0402065	-0.0851323	0.0130645
ADRB2_-_148206186.23-P1P2	0.0299778	0.341942	0.344103
ADRB2_-_148206207.23-P1P2	0.0351973	-0.126862	-0.0302094
ADRB2_-_148206413.23-P1P2	-0.0134793	0.143859	0.1029
ADRB3_+_37822768.23-P1P2	0.0493292	-0.547839	-0.349158
ADRB3_-_37822919.23-P1P2	0.0573875	-0.545005	-0.332182
ADRB3_-_37823380.23-P1P2	0.00514279	0.606995	0.515933
ADRB3_-_37823667.23-P1P2	-0.123531	0.203991	-0.0480218
ADRB3_-_37823742.23-P1P2	0.0531649	-0.00875815	0.0991586
ADRBK1_+_67033933.23-P1P2	-0.0013566	-0.00614429	0.00214076
ADRBK1_+_67034195.23-P1P2	-0.0140092	0.63748	0.506059
ADRBK1_+_67034566.23-P1P2	-0.256031	0.599812	0.0350591
ADRBK1_-_67033953.23-P1P2	-0.00466855	0.112786	0.0934849
ADRBK1_-_67034001.23-P1P2	-0.0286521	-0.109157	-0.131837
ADRBK2_+_25960616.23-P1P2	-0.0189066	-0.0633687	-0.0766265
ADRBK2_-_25960625.23-P1P2	-0.0439906	0.576695	0.401768
ADRBK2_-_25960628.23-P1P2	-0.245596	0.588262	0.0445801
ADRBK2_-_25960707.23-P1P2	-0.0535471	0.129015	0.017876
ADRBK2_-_25960854.23-P1P2	-0.0154202	0.0283715	0.00482118
ADRM1_+_60877224.23-P1P2	0.0553436	0.0811166	0.176701
ADRM1_+_60878013.23-P1P2	0.0193952	-0.199407	-0.118341
ADRM1_+_60878508.23-P1P2	-0.0087748	0.286626	0.228338
ADRM1_-_60878073.23-P1P2	-0.0171898	-0.103863	-0.106656
ADRM1_-_60878094.23-P1P2	0.0241241	-0.319529	-0.208083
ADSL_+_40742907.23-P1P2	-0.0182369	0.056602	0.0228106
ADSL_-_40742556.23-P1P2	-0.104842	0.117853	-0.0845521
ADSL_-_40742584.23-P1P2	-0.174001	-1.01929	-1.1413
ADSL_-_40742729.23-P1P2	-0.259196	0.332159	-0.189823
ADSL_-_40742737.23-P1P2	-0.136007	-0.744322	-0.847086
ADSSL1_+_105190776.23-P1P2	-0.0272189	0.40138	0.288742
ADSSL1_+_105190789.23-P1P2	-0.0526359	0.181208	0.0622634
ADSSL1_+_105190984.23-P1P2	0.0915337	-0.29265	-0.0634801
ADSSL1_-_105190591.23-P1P2	0.085896	-0.12825	0.0608592
ADSSL1_-_105190615.23-P1P2	-0.0109526	-0.168167	-0.147958
ADSS_+_244614826.23-P1P2	-0.0193263	0.143136	0.0916741
ADSS_-_244614690.23-P1P2	0.0204499	0.0842784	0.115828
ADSS_-_244614820.23-P1P2	-0.106093	-0.216933	-0.360913
ADSS_-_244614958.23-P1P2	-0.211614		-1.00163
ADSS_-_244615191.23-P1P2	-0.250662	-1.14657	-1.38492
ADTRP_+_11779004.23-P1P2	-0.0764882	0.175749	0.0144144
ADTRP_+_11779041.23-P1P2	0.0573024	0.163411	0.247637
ADTRP_-_11778993.23-P1P2	0.086877	-0.138489	0.0542612
ADTRP_-_11779009.23-P1P2	-0.016878	-0.262924	-0.236311
ADTRP_-_11779051.23-P1P2	0.048629	-0.090795	0.0237464
AEBP1_+_44143999.23-P1P2	0.14006	-0.562861	-0.196446
AEBP1_+_44144173.23-P1P2	-0.0416238	0.259514	0.1464
AEBP1_+_44144323.23-P1P2	0.0064735	0.497046	0.428339
AEBP1_+_44144374.23-P1P2	0.034154	0.502826	0.483413
AEBP1_-_44144382.23-P1P2	-0.101074	0.145526	-0.0550435
AEBP2_+_19592640.23-P1P2	-0.298392		-1.13382
AEBP2_+_19592658.23-P1P2	-0.00963708	0.367793	0.293221
AEBP2_+_19592704.23-P1P2	-0.0492462	0.194867	0.0796105
AEBP2_-_19592882.23-P1P2	-0.113235	0.494285	0.208365
AEBP2_-_19593012.23-P1P2	-0.117537	0.214955	-0.0281436
AEN_+_89164562.23-P1P2	-0.00451146	0.296922	0.244521
AEN_+_89164789.23-P1P2	0.0184425	-0.0905754	-0.0309738
[truncated: 102,538 more rows]

## Sheet: Cra screen
	sgRNA phenotype scores
	O			C			H
CRISPRa sgRNA	gamma	rho	tau	gamma	rho	tau	gamma	rho	tau
A1BG_+_58859110.23-P1	0.0100133	-0.0537239	-0.0545846	0.0100133	0.0825007	0.2858	0.0100133	-0.0632257	-0.0949691
A1BG_+_58859124.23-P1	0.0181688	0.259198	0.461751	0.0181688	0.158802	0.525956	0.0181688	-0.0590243	-0.0596505
A1BG_+_58859191.23-P1	0.0740955	0.0025418		0.0740955	-0.0888042		0.0740955	-0.134949
A1BG_+_58859199.23-P1	-0.00390544	0.314446	0.492182	-0.00390544	0.0267382	0.0804488	-0.00390544	-0.0838584	-0.184839
A1BG_+_58859204.23-P1	-0.122227	0.184428	-0.0191958	-0.122227	0.117287	-0.114469	-0.122227	0.186919	0.03197
A1BG_+_58864862.23-P2	-0.0286632	-0.0641707	-0.17101	-0.0286632	0.0396682	0.0231387	-0.0286632	0.140351	0.228842
A1BG_+_58864915.23-P2	0.0338797	-0.0981206	-0.0632121	0.0338797	0.156376	0.578199	0.0338797	-0.140797	-0.189157
A1BG_+_58865068.23-P2	-0.0161944	0.0446625	0.0334473	-0.0161944	-0.103443	-0.3232	-0.0161944	-0.158005	-0.387132
A1BG_+_58865122.23-P2	-0.0778077	0.0160241	-0.17101	-0.0778077	-0.135291	-0.641687	-0.0778077	0.169545	0.135841
A1BG_+_58865296.23-P2	-0.0977739	-0.0347789	-0.302985	-0.0977739	0.093452	-0.0882515	-0.0977739	0.157886	0.0463559
A1BG_-_58858991.23-P1	-0.0394367	0.109771	0.0764678	-0.0394367	-0.0995959	-0.399777	-0.0394367	0.00464382	-0.103929
A1BG_-_58859113.23-P1	-0.053016	0.0131224	-0.111573	-0.053016	0.373924	0.849943	-0.053016	-0.0554892	-0.279544
A1BG_-_58859158.23-P1	-0.0772993	0.103511	-0.0312295	-0.0772993	0.0582954	-0.108051	-0.0772993	-0.151465	-0.568182
A1BG_-_58859244.23-P1	0.0137315	0.0486835	0.117102	0.0137315	-0.00216248	0.0671934	0.0137315	-0.0374656	-0.0264511
A1BG_-_58859314.23-P1	0.0156025	-0.261724	-0.369358	0.0156025	0.166439	0.537311	0.0156025	0.0620032	0.198187
A1BG_-_58864882.23-P2	-0.0979539	0.137659	-0.0305265	-0.0979539	-0.0219214	-0.405827	-0.0979539	0.169956	0.0723125
A1BG_-_58864933.23-P2	0.0150895	0.108454	0.21521	0.0150895	0.0576628	0.236609	0.0150895	-0.0385032	-0.0243888
A1BG_-_58864955.23-P2	-0.00796138	0.157925	0.233975	-0.00796138	0.174482	0.471055	-0.00796138	-0.231474	-0.522302
A1BG_-_58864975.23-P2	-0.0435688	0.0359203	-0.0510899	-0.0435688	-0.0731722	-0.342691	-0.0435688	0.0670943	0.0201355
A1BG_-_58865269.23-P2	-0.0200948	0.0520502	0.0350664	-0.0200948	-0.0410106	-0.166339	-0.0200948	0.0730892	0.108389
A1CF_+_52645473.23-P1P2	-0.0236689	-0.183474	-0.346936	-0.0236689	0.0636741	0.107802	-0.0236689	-0.00335776	-0.0710893
A1CF_+_52645511.23-P1P2	0.0380555	0.0266223	0.145008	0.0380555	-0.0446887	0.0415842	0.0380555	-0.0455338	0.0336067
A1CF_+_52645527.23-P1P2	-0.00369923	-0.215378	-0.345856	-0.00369923	-0.0129002	-0.0276543	-0.00369923	-0.0312877	-0.068618
A1CF_+_52645549.23-P1P2	-0.0194287	0.152789	0.19623	-0.0194287	-0.0546167	-0.201214	-0.0194287	0.00802219	-0.0325126
A1CF_-_52645451.23-P1P2	-0.0094218	0.0599296	0.075103	-0.0094218	-0.0288666	-0.0929656	-0.0094218	-0.0377113	-0.10104
A1CF_-_52645458.23-P1P2	0.0138769	0.12644	0.240545	0.0138769	-0.150911	-0.340834	0.0138769	-0.224435	-0.436987
[truncated: 209,053+ more rows]
