# Supplementary material for: A curative combination cancer therapy achieves high fractional cell killing through low cross-resistance and drug additivity
Source: eLife. 2019 Nov 19;8:e50036. doi: 10.7554/eLife.50036 (PMC6897534; doi:10.7554/eLife.50036)
Supplement: Figure 5—source data 3. [file elife-50036-fig5-data3.xlsx]

## Sheet: Cri_O
Pfeiffer CRISPRi Vincristine screen
	rho scores (ie drug vs DMSO)					gamma growth scores (ie DMSO vs T=0)				tau scores (ie drug vs T=0)
gene	transcripts	Mann-Whitney p-value	average phenotype of strongest 5	Aggregate score	sgRNAs passing read count filter	transcripts	Mann-Whitney p-value	average phenotype of strongest 5	sgRNAs passing read count filter	transcripts	Mann-Whitney p-value	average phenotype of strongest 5	sgRNAs passing read count filter
A1BG	P2	0.375317	-0.0762729	-0.0324618	10	P1	0.394397	0.0158394	10	P1	0.316231	0.188417	10
A1CF	P1P2	0.824248	-0.0712206	-0.00597839	10	P1P2	0.700139	0.0132369	10	P1P2	0.687242	-0.00774807	10
A2M	P1P2	0.629472	-0.109905	-0.0220935	8	P1P2	0.641424	-0.0149697	8	P1P2	0.449022	-0.193693	8
A2ML1	P1P2	0.392973	-0.190047	-0.07709	10	P1P2	0.642093	0.0126331	10	P1P2	0.556534	-0.263583	10
A3GALT2	ENST00000442999.3	0.732725	-0.0468249	-0.00632412	9	ENST00000442999.3	0.651025	0.01664	9	ENST00000442999.3	0.878343	-0.0230203	9
A4GALT	P1P2	0.0484889	-0.2566	-0.337264	9	P1P2	0.103864	-0.0466756	9	P1P2	0.0127315	-0.602154	9
A4GNT	P1P2	0.740267	-0.0142466	-0.00186077	9	P1P2	0.711494	-0.0237528	10	P1P2	0.537813	-0.185093	10
AAAS	P1P2	0.471666	-0.161622	-0.052748	10	P1P2	0.645675	0.0245088	10	P1P2	0.497043	-0.267217	10
AACS	P1P2	0.0164248	-0.306805	-0.547493	10	P1P2	0.392035	-0.0280061	10	P1P2	0.0128177	-0.716136	10
AADAC	P1P2	0.277366	0.115149	0.0641318	10	P1P2	0.361039	-0.0379859	10	P1P2	0.359312	0.161137	10
AADACL2	P1P2	0.525534	-0.0469411	-0.0131153	8	P1P2	0.702291	-0.0205154	8	P1P2	0.366993	-0.0980475	9
AADACL3	P1P2	0.164599	0.205655	0.161145	9	P1P2	0.298164	-0.0358164	9	P1P2	0.18149	0.194249	9
AADACL4	P1P2	0.613593	0.0285208	0.00604983	10	P1P2	0.98265	-0.00127065	10	P1P2	0.735508	0.104654	10
AADAT	P1P2	0.415355	-0.25024	-0.0954866	10	P1P2	0.0676677	0.0485365	10	P1P2	0.874451	-0.26053	10
AAED1	P1P2	0.664494	-0.109302	-0.019402	9	P1P2	0.816522	-0.0672712	10	P1P2	0.763307	-0.0828886	10
AAGAB	P1P2	0.921022	0.00812708	0.000290382	8	P1P2	0.573262	-0.0105628	9	P1P2	0.895632	-0.00297347	9
AAK1	P1P2	0.964761	-0.0364903	-0.000568524	10	P1P2	0.203453	0.0382569	10	P1P2	0.665382	0.113832	10
AAMDC	P1P2	0.136437	0.0343557	0.0297201	8	P1P2	0.98245	-0.00478823	9	P1P2	0.282834	-0.104591	9
AAMP	P1P2	0.28451	-0.123012	-0.0671526	10	P1P2	0.492577	-0.0840759	10	P1P2	0.0717331	-0.527017	10
AANAT	P1P2	0.504114	0.0221269	0.00658211	10	P1P2	0.538686	0.0199406	10	P1P2	0.357617	0.0693894	10
AAR2	P1P2	0.83824	-0.0130463	-0.00099976	10	P1P2	0.00215084	-0.147999	10	P1P2	0.200404	-0.244572	10
AARD	P1P2	0.0652943	0.331064	0.392352	10	P1P2	0.767914	0.0105813	9	P1P2	0.0420343	0.73213	10
AARS	P1P2	0.6129	-0.0578393	-0.0122972	6	P1P2	1.91425e-05	-0.244765	10	P1P2	0.00116379	-0.81729	10
AARS2	P1P2	0.688152	0.0196032	0.0031819	9	P1P2	0.00648108	-0.103587	9	P1P2	0.503531	-0.373844	9
AARSD1	P1	0.438035	-0.157096	-0.0563176	10	P2	0.379321	-0.0323319	10	P1	0.416552	-0.366298	10
AASDH	P1P2	0.974927	0.0966669	0.00106604	10	P1P2	0.376142	-0.0421158	10	P1P2	0.663243	0.0303248	10
AASDHPPT	P1P2	0.151091	-0.158019	-0.129696	10	P1P2	0.0359418	-0.0566138	10	P1P2	0.0654477	-0.457184	10
AASS	P1P2	0.135498	-0.236439	-0.205245	10	P1P2	0.139032	0.0311859	10	P1P2	0.279298	-0.309482	10
AATF	P1P2	0.438395	-0.133461	-0.0477971	9	P1P2	0.0294308	-0.166011	10	P1P2	0.0415018	-0.733134	10
AATK	ENST00000326724.4	0.680233	-0.102586	-0.017167	10	ENST00000326724.4	0.255464	-0.0584707	10	ENST00000326724.4	0.93744	-0.31991	10
ABAT	P1	0.710689	0.00723433	0.001073	10	P2	0.482066	0.0145863	9	P1	0.644331	0.0247947	10
ABCA1	P1P2	0.130536	-0.216304	-0.191271	9	P1P2	0.911897	-0.0927622	10	P1P2	0.0318394	-0.675223	10
ABCA10	P1P2	0.263132	0.0984944	0.0571096	10	P1P2	0.635477	-0.00903698	10	P1P2	0.258765	0.338842	10
ABCA12	P1P2	0.331296	0.0934014	0.0448125	10	P1P2	0.546771	0.0186725	10	P1P2	0.189152	0.197927	10
ABCA13	P1P2	0.0954331	-0.291122	-0.297032	10	P1P2	0.99191	0.00417393	10	P1P2	0.104638	-0.475574	10
ABCA2	P1P2	0.51525	0.0505958	0.0145707	10	P1P2	0.670228	-0.0219498	10	P1P2	0.546888	0.0611124	10
ABCA3	P1P2	0.919464	0.0994639	0.00362698	10	P1P2	0.0590196	-0.105325	10	P1P2	0.507739	-0.335707	10
ABCA4	P1P2	0.181723	-0.132868	-0.0984007	10	P1P2	0.0554069	0.0549029	10	P1P2	0.320516	-0.159675	10
ABCA5	P1P2	0.735349	0.00618416	0.000825625	10	P1P2	0.573582	-0.025346	10	P1P2	0.999178	0.0130467	10
ABCA6	P1P2	0.0109024	-0.366655	-0.719553	10	P1P2	0.837241	-0.00131866	10	P1P2	0.00714948	-0.671986	10
ABCA7	P1	0.951177	-0.017039	-0.000370404	10	P2	0.365304	-0.0112151	10	P1	0.78722	0.0581744	10
ABCA8	P1P2	0.719764	0.00648199	0.000925691	10	P1P2	0.879352	-0.0283372	10	P1P2	0.964998	0.0526538	10
ABCA9	P1P2	0.896669	-0.0332526	-0.0015751	10	P1P2	0.127454	-0.0420043	10	P1P2	0.462633	-0.155698	10
ABCB1	ENST00000265724.3	0.122933	0.159763	0.145438	10	ENST00000265724.3	0.734283	0.00339861	10	ENST00000265724.3	0.106573	0.339888	10
ABCB10	P1P2	0.77031	-0.070512	-0.00799144	8	P1P2	0.158179	-0.0633656	10	P1P2	0.396572	-0.401937	10
ABCB11	P1P2	0.94032	-0.0122714	-0.000327948	10	P1P2	0.934418	-0.00969294	10	P1P2	0.956197	0.0851392	10
ABCB4	P1P2	0.141178	0.0692074	0.0588424	10	P1P2	0.729087	-0.00863458	10	P1P2	0.138576	0.104895	10
ABCB5	P1P2	0.469246	-0.10679	-0.035091	8	P1P2	0.206206	-0.0638678	9	P1P2	0.135565	-0.44005	9
ABCB6	P1P2	0.235084	0.139229	0.087544	10	P1P2	0.740378	0.0125622	10	P1P2	0.172415	0.358941	10
ABCB7	P1P2	0.932118	-0.0243414	-0.00074312	9	P1P2	2.36155e-07	-0.209392	10	P1P2	0.00166941	-0.785991	10
ABCB8	P1P2	0.19303	0.0717895	0.0512846	10	P1P2	0.649477	-0.0292467	10	P1P2	0.282517	0.0649572	10
ABCB9	P1	0.165423	0.121672	0.0950752	10	P1	0.396931	-0.0349363	10	P1	0.279625	0.000123578	10
ABCC1	P1P2	0.00991659	-0.238497	-0.477861	10	P1P2	0.720272	-0.0100562	10	P1P2	0.0124612	-0.505692	10
ABCC10	P1P2	0.378038	-0.149179	-0.0630228	10	P1P2	0.713137	-0.01701	10	P1P2	0.265279	-0.216794	10
ABCC11	P2	0.415355	0.0858555	0.0327607	10	P1	0.155682	-0.059117	10	P2	0.470653	0.0731861	9
ABCC12	ENST00000311303.3	0.52868	-0.12405	-0.0343378	9	ENST00000311303.3	0.193917	0.0531068	9	ENST00000311303.3	0.797114	-0.110551	9
ABCC2	P1P2	0.600328	-0.0166137	-0.00368179	10	P1P2	0.376856	0.0239983	10	P1P2	0.885138	-0.0407655	10
ABCC3	P1P2	0.653709	0.0035862	0.000662067	10	P1P2	0.982181	-0.0265748	10	P1P2	0.677517	-0.0308798	10
ABCC4	P1P2	0.10064	-0.159521	-0.15908	10	P1P2	0.663708	-0.00441218	10	P1P2	0.150611	-0.496187	10
ABCC5	P1P2	0.0729287	-0.33391	-0.379689	10	P1P2	0.58575	0.00978813	10	P1P2	0.0761594	-0.583965	10
ABCC6	ENST00000205557.7	0.397055	-0.0637013	-0.0255538	8	ENST00000205557.7	0.106324	-0.0679133	9	ENST00000205557.7	0.166122	-0.175405	9
ABCC8	P1P2	0.926646	0.0260868	0.000863111	10	P1P2	0.0281631	-0.0461844	10	P1P2	0.570355	-0.238239	10
ABCC9	P1P2	0.828752	-0.153459	-0.0125185	10	P1P2	0.757197	0.00439195	10	P1P2	0.808596	-0.14697	10
ABCD1	P1P2	0.793578	0.00833998	0.000837423	10	P1P2	0.024808	-0.0633875	10	P1P2	0.612874	-0.2369	10
ABCD2	P1P2	0.182572	0.121279	0.0895726	9	P1P2	0.806764	-0.0248111	9	P1P2	0.237874	0.302222	9
ABCD3	P1P2	0.719653	-0.033164	-0.00473835	10	P1P2	0.311686	-0.0483245	10	P1P2	0.3198	-0.365123	10
ABCD4	P1P2	0.525448	0.099362	0.0277687	10	P1P2	0.440358	-0.0174958	10	P1P2	0.662923	0.195928	10
ABCE1	P1P2	0.497176	0.019895	0.00603792	8	P1P2	0.000271833	-0.25014	10	P1P2	0.0139878	-0.418125	10
ABCF1	P2	0.0663177	0.233159	0.274747	10	P2	0.158222	-0.0476406	10	P2	0.132673	0.298554	10
ABCF2	P1P2	0.108202	0.139726	0.134943	10	P1P2	0.0870029	0.0385479	10	P1P2	0.0321814	0.364247	10
ABCF3	P1P2	0.113443	0.106407	0.100578	10	P1P2	0.193253	0.0220061	10	P1P2	0.0691936	0.327992	10
ABCG1	P1P2	0.758141	0.07257	0.00872654	10	P1P2	0.573481	-0.00543465	10	P1P2	0.70018	0.0649687	10
ABCG2	P1P2	0.0663363	0.145472	0.171402	9	P1P2	0.167366	0.0601757	9	P1P2	0.0241778	0.51222	9
ABCG4	P1P2	0.530311	-0.0783228	-0.0215756	7	P1P2	0.859703	-0.026455	9	P1P2	0.471131	-0.256838	9
ABCG5	P1P2	0.405876	0.0667921	0.0261562	9	P1P2	0.373904	-0.0465309	9	P1P2	0.611375	0.114205	9
ABCG8	P1P2	0.440931	-0.0336924	-0.011982	10	P1P2	0.958164	0.00703198	10	P1P2	0.563598	-0.196258	9
ABHD1	P1P2	0.076505	0.216297	0.241454	10	P1P2	0.348887	-0.0248773	10	P1P2	0.110199	0.429558	10
ABHD10	P1P2	0.463737	0.0436528	0.0145682	9	P1P2	0.327111	-0.0686724	10	P1P2	0.902722	-0.127272	10
ABHD11	P1P2	0.518894	-0.0218838	-0.00623518	10	P1P2	0.549316	-0.0374091	10	P1P2	0.318325	-0.291349	9
ABHD12	P1P2	0.3274	-0.102946	-0.0499208	10	P1P2	0.137664	-0.0464656	10	P1P2	0.113552	-0.486907	10
ABHD12B	P1P2	0.595696	-0.0112401	-0.00252875	10	P1P2	0.249495	0.0438618	10	P1P2	0.276168	0.0856468	10
ABHD13	P1P2	0.164161	0.0511728	0.0401568	10	P1P2	0.160443	-0.0363517	10	P1P2	0.359004	0.0811484	10
ABHD14A	P1P2	0.423123	-0.120956	-0.045181	10	P1P2	0.264918	-0.0317229	10	P1P2	0.187618	-0.425696	10
ABHD14B	P2	0.49348	-0.0943546	-0.0289414	10	P2	0.242674	-0.0410024	10	P2	0.30381	-0.325829	10
ABHD15	P1P2	0.961571	0.0473654	0.000806098	10	P1P2	0.515079	0.00987165	10	P1P2	0.862399	0.0151954	10
ABHD16A	P1P2	0.908667	-0.0514574	-0.00214038	9	P1P2	0.162246	-0.0551689	10	P1P2	0.754676	-0.187936	10
ABHD16B	P1P2	0.549266	-0.102041	-0.0265528	8	P1P2	0.648684	-0.0136192	9	P1P2	0.502145	-0.221908	9
ABHD17A	P1P2	0.847867	-0.0053296	-0.000381983	10	P1P2	0.513279	-0.00528677	10	P1P2	0.709585	-0.203571	10
ABHD17B	P1P2	0.156697	0.172833	0.13912	10	P1P2	0.175951	-0.0372855	10	P1P2	0.248478	0.0946395	10
ABHD17C	P1P2	0.192687	-0.171018	-0.122303	8	P1P2	0.0959175	-0.109679	9	P1P2	0.0210593	-0.754783	9
ABHD2	P1P2	0.100241	0.186681	0.186486	10	P1P2	0.79106	0.0106298	10	P1P2	0.098789	0.45491	10
ABHD3	P1P2	0.0135205	0.353538	0.660765	10	P1P2	0.62566	-0.0227923	10	P1P2	0.0256165	0.560582	10
ABHD4	P1P2	0.100609	-0.244583	-0.243938	10	P1P2	0.531431	-0.0173149	10	P1P2	0.0652112	-0.582322	10
ABHD5	P1P2	0.667027	-0.147336	-0.0259101	10	P1P2	0.389278	0.0241241	10	P1P2	0.98132	-0.124053	10
ABHD6	P1P2	0.877815	0.086646	0.00490388	10	P1P2	0.857381	-0.0151513	10	P1P2	0.595923	0.263376	10
ABHD8	P1P2	0.282115	-0.244306	-0.134264	10	P1P2	0.797065	0.0196343	10	P1P2	0.283838	-0.366803	10
ABI1	P1P2	0.616407	0.00419106	0.000880677	10	P1P2	0.0404816	0.0480169	10	P1P2	0.262635	0.203189	10
ABI2	P1P2	0.270862	-0.103627	-0.0587828	10	P1P2	0.059594	-0.0362085	10	P1P2	0.123234	-0.443536	10
ABI3	P1P2	0.521973	-0.140145	-0.0395701	10	P1P2	0.121829	0.0322387	10	P1P2	0.769828	-0.0308864	10
ABI3BP	P1P2	0.538388	-0.0842851	-0.0226647	10	P1P2	0.0196104	0.0431924	10	P1P2	0.974156	0.140151	10
ABL1	ENST00000372348.2	0.862642	-0.00312833	-0.000200743	10	ENST00000372348.2	0.0602933	0.0513658	10	ENST00000372348.2	0.404909	0.13501	10
ABL2	P2	0.102653	-0.220783	-0.218272	10	P2	0.171075	0.0397479	10	P2	0.193202	-0.350402	10
ABLIM1	ENST00000277895.5	0.0377574	0.258697	0.368126	10	ENST00000277895.5	0.999062	-0.00660811	10	ENST00000277895.5	0.0299525	0.500115	10
ABLIM2	P1P2	0.75127	-0.0594774	-0.00738731	9	P1P2	0.249357	-0.0540893	9	P1P2	0.426071	-0.184338	9
ABLIM3	P1P2	0.831411	-0.0341023	-0.00273447	10	P1P2	0.872172	-0.0166056	10	P1P2	0.773545	0.0228962	10
ABO	P2	0.393055	-0.176187	-0.0714519	10	P1	0.141761	0.0371815	10	P2	0.525062	-0.389136	10
ABR	P1P2	0.908057	0.0417124	0.0017472	10	P1P2	0.748494	0.00989088	10	P1P2	0.824035	0.0996576	10
ABRA	P1P2	0.516399	-0.0825194	-0.0236843	10	P1P2	0.445162	0.0187405	10	P1P2	0.765891	-0.122839	10
ABRACL	P1P2	0.773076	-0.0323618	-0.00361733	10	P1P2	0.0271259	0.0681258	10	P1P2	0.684102	0.187271	10
ABT1	P1P2	0.125986	0.227148	0.204361	10	P1P2	0.241432	-0.0626316	10	P1P2	0.432092	0.144218	10
ABTB1	P1P2	0.198822	-0.176946	-0.124134	10	P1P2	0.592032	0.00726075	10	P1P2	0.236026	-0.24712	10
ABTB2	P1P2	0.528547	-0.0569601	-0.0157732	10	P1P2	0.575084	-0.0333914	10	P1P2	0.557424	-0.0227886	10
ACAA1	P1P2	0.705836	-0.106774	-0.0161545	10	P1P2	0.473601	0.0165144	10	P1P2	0.770278	-0.162083	10
ACAA2	P1P2	0.0264322	0.305881	0.48264	10	P1P2	0.661257	-0.00675126	10	P1P2	0.0304912	0.612869	10
ACACA	P1P2	0.35153	-0.163872	-0.0744042	10	P1P2	0.047766	0.0344722	10	P1P2	0.792209	-0.19097	10
ACACB	P2	0.509809	-0.0986587	-0.0288668	10	P1	0.0150636	0.0544672	10	P1	0.769265	0.118103	10
ACAD10	P1P2	0.555654	0.0273014	0.00696718	10	P1P2	0.951258	0.00192412	10	P1P2	0.592558	0.118531	10
ACAD11	P1P2	0.564438	-0.067926	-0.0168717	10	P1P2	0.866851	0.0231666	10	P1P2	0.570155	0.0481978	10
ACAD8	P1P2	0.388309	0.071664	0.0294412	10	P1P2	0.738936	-0.0106425	10	P1P2	0.50906	0.164631	10
ACAD9	P1P2	0.613697	0.0615098	0.0130429	10	P1P2	0.709305	-0.0399351	10	P1P2	0.865177	0.13168	10
ACADL	P1P2	0.2625	0.160871	0.0934453	10	P1P2	0.230512	-0.0335086	10	P1P2	0.468665	0.0775305	10
ACADM	P1P2	0.39668	-0.117725	-0.0472737	10	P1P2	0.257003	-0.0261071	10	P1P2	0.315237	-0.314012	10
ACADS	P1P2	0.250448	0.107547	0.0646659	10	P1P2	0.540142	-0.0684227	10	P1P2	0.707832	0.102697	10
ACADSB	P1P2	0.520432	0.01284	0.00364188	10	P1P2	0.173849	0.0359466	10	P1P2	0.861704	0.225598	10
ACADVL	P1P2	0.179262	-0.163714	-0.122215	10	P1P2	0.672263	-0.0115506	10	P1P2	0.207534	-0.435736	10
ACAN	P1P2	0.943741	-0.0468452	-0.00117802	10	P1P2	0.846896	-0.00432799	10	P1P2	0.883045	0.00379396	10
ACAP1	P1P2	0.00215418	0.327205	0.872562	10	P1P2	0.908518	-0.0159227	10	P1P2	0.00153832	0.613718	10
ACAP2	P1P2	0.934188	-0.0177223	-0.000523974	10	P1P2	0.74894	-0.0106504	10	P1P2	0.770841	-0.270017	10
ACAP3	P1P2	0.0320293	0.186882	0.279286	10	P1P2	0.176186	0.0364869	10	P1P2	0.00848651	0.470915	10
ACAT1	P1P2	0.758592	-0.0515982	-0.00619135	10	P1P2	0.996834	-0.0121686	10	P1P2	0.65727	-0.117593	10
ACAT2	P1P2	0.561382	-0.0502262	-0.0125938	9	P1P2	0.754107	-0.0256676	9	P1P2	0.579641	-0.0612688	9
ACBD3	P1P2	0.878049	0.0292162	0.00165016	10	P1P2	0.609823	-0.010947	10	P1P2	0.901556	0.0182026	10
ACBD4	P1	0.74736	0.0289029	0.00365535	9	P2	0.0446653	0.0390993	9	P1	0.765533	-0.206106	9
ACBD5	P1P2	0.0606554	0.0434534	0.0528885	9	P1P2	0.950838	0.0178425	9	P1P2	0.02293	0.35227	8
ACBD6	P1P2	0.613384	0.107883	0.0229001	10	P1P2	0.271716	0.0373025	10	P1P2	0.379972	0.274368	10
ACBD7	P1P2	0.289543	-0.0599614	-0.0322764	10	P1P2	0.979719	-0.00709742	10	P1P2	0.380692	-0.0404769	10
ACCS	P1P2	0.278686	0.100917	0.0559975	9	P1P2	0.750697	-0.0100623	9	P1P2	0.262282	0.189208	9
ACCSL	ENST00000378832.1	0.29272	0.110569	0.0589939	9	ENST00000378832.1	0.522316	-0.0326655	9	ENST00000378832.1	0.36354	0.154666	9
ACD	P1P2	0.0688325	0.251597	0.292407	10	P1P2	0.555015	-0.027549	10	P1P2	0.0924316	0.479074	10
ACE	P1	0.225409	-0.151752	-0.0981882	10	P2	0.120243	0.0483181	10	P1	0.406322	-0.174898	10
ACE2	P1P2	0.444673	0.101072	0.0355733	8	P1P2	0.00453941	-0.136171	10	P1P2	0.442082	-0.339157	10
ACER1	P1P2	0.174792	-0.171838	-0.130164	10	P1P2	0.326748	-0.0710815	10	P1P2	0.0442381	-0.492375	10
ACER2	P1P2	0.920523	-0.0865743	-0.00311367	10	P1P2	0.435326	0.0147768	10	P1P2	0.83046	-0.133271	10
ACER3	P1P2	0.933245	-0.016236	-0.000487154	10	P1P2	0.0362417	0.0512542	10	P1P2	0.523719	0.0713915	10
ACHE	P1	0.544573	-0.00375443	-0.00099096	10	P1	0.0629506	0.0516376	10	P1	0.2897	0.22277	10
ACIN1	P1	0.0896293	0.140437	0.147115	10	P2	0.0257196	-0.0701777	10	P1	0.123449	0.0620036	10
ACKR2	P1P2	0.372688	0.156026	0.0668811	10	P1P2	0.978078	-0.0248838	10	P1P2	0.279298	0.238037	10
ACKR3	P1	0.789123	-0.0590734	-0.00607601	10	P1	0.420344	-0.0370825	10	P1	0.598477	-0.199516	10
ACKR4	P1P2	0.0980515	0.173966	0.175453	9	P1P2	0.435446	-0.0192137	8	P1P2	0.163338	0.280504	9
ACLY	P1P2	0.241517	-0.203926	-0.125833	10	P1P2	0.26454	-0.0537222	10	P1P2	0.0821973	-0.509403	10
ACMSD	P1P2	0.306963	0.0438983	0.0225161	10	P1P2	0.363362	-0.0202548	10	P1P2	0.471562	0.213883	10
ACN9	P1P2	0.801361	-0.035455	-0.00340978	10	P1P2	0.168517	0.00144873	10	P1P2	0.679986	0.0240652	9
ACO1	P1P2	0.660892	-0.00875308	-0.00157441	10	P1P2	0.529024	-0.0272905	10	P1P2	0.533448	0.0485249	10
ACO2	P1P2	0.696276	-0.0460056	-0.00723292	10	P1P2	0.433684	-0.0054778	10	P1P2	0.68605	-0.0859503	10
ACOT1	P1P2	0.0419625	0.34759	0.47868	10	P1P2	0.373454	0.0368401	10	P1P2	0.0408007	0.692289	10
ACOT11	P1	0.67737	-0.0838965	-0.0141931	9	P2	0.466107	-0.0440651	10	P1	0.358541	-0.455017	10
ACOT12	P1P2	0.829215	-0.0411102	-0.00334362	10	P1P2	0.732623	-0.00419564	10	P1P2	0.776704	-0.111337	10
ACOT13	P1P2	0.904533	-0.0245086	-0.00106798	10	P1P2	0.275062	0.0436174	10	P1P2	0.759156	0.129533	10
ACOT2	P1P2	0.747335	-0.0875885	-0.0110786	10	P1P2	0.0967679	-0.0524901	10	P1P2	0.355773	-0.338737	10
ACOT4	P1P2	0.359169	-0.1171	-0.0520745	10	P1P2	0.321484	-0.0442115	10	P1P2	0.303118	-0.37778	10
ACOT6	P1P2	0.0861554	0.153448	0.163378	10	P1P2	0.290334	-0.0148229	10	P1P2	0.174789	0.314425	10
ACOT7	P1P2	0.580984	-0.0471695	-0.0111243	10	P1P2	0.735501	0.00175399	10	P1P2	0.495458	-0.0899813	10
ACOT8	P1P2	0.230615	-0.157623	-0.100423	9	P1P2	0.492948	-0.0409727	10	P1P2	0.122448	-0.395435	10
ACOT9	P1P2	0.529806	-0.0238874	-0.00659013	9	P1P2	0.783342	-0.00771313	9	P1P2	0.531862	-0.0443531	9
ACOX1	P1P2	0.592412	0.00204866	0.000465816	10	P1P2	0.763016	0.00497258	10	P1P2	0.504066	0.166558	10
ACOX2	P1	0.380369	0.0701129	0.029433	10	P1	0.316135	-0.00829141	10	P1	0.195785	0.137974	10
ACOX3	P2	0.189859	0.0399736	0.0288437	9	P1	0.124472	0.0148364	10	P2	0.289767	0.0500001	10
ACOXL	P1P2	0.150543	-0.106847	-0.0878642	10	P1P2	0.920641	-0.0078653	10	P1P2	0.306937	-0.0772063	10
ACP1	P1P2	0.280702	0.101853	0.0561978	9	P1P2	0.737827	-0.0564419	10	P1P2	0.414191	0.0664499	10
ACP2	P1P2	0.506198	0.0412915	0.0122091	10	P1P2	0.219893	0.0308465	10	P1P2	0.31135	0.172479	10
ACP5	P2	0.564238	0.0726345	0.0180524	10	P1	0.674516	-0.00793415	10	P2	0.542976	0.165498	10
ACP6	P1P2	0.47386	0.0975314	0.0316343	10	P1P2	0.292889	-0.0799058	10	P1P2	0.921173	0.0120514	10
ACPL2	P1P2	0.280066	0.0893344	0.0493786	8	P1P2	0.89071	0.000654101	9	P1P2	0.402377	0.38272	9
ACPP	P1P2	0.184797	-0.203148	-0.148969	10	P1P2	0.253382	-0.0204245	10	P1P2	0.107792	-0.242712	10
ACPT	ENST00000270593.1	0.507812	-0.153194	-0.0450845	10	ENST00000270593.1	0.636211	-0.0208864	10	ENST00000270593.1	0.412005	-0.337134	10
ACR	P1P2	0.610992	0.00934515	0.00199953	10	P1P2	0.272165	0.0218974	10	P1P2	0.381973	0.0936317	10
ACRBP	P1P2	0.261932	-0.226962	-0.132049	10	P1P2	0.840227	-0.0139371	10	P1P2	0.256659	-0.475554	10
ACRC	P1P2	0.0889869	-0.250047	-0.262717	10	P1P2	0.421955	0.0119998	10	P1P2	0.0960393	-0.567882	9
ACRV1	P1P2	0.522937	0.0785386	0.0221126	10	P1P2	0.119125	-0.046176	10	P1P2	0.870276	0.00791632	10
ACSBG1	P1P2	0.331296	-0.11198	-0.053726	10	P1P2	0.102077	0.029486	10	P1P2	0.507456	-0.299396	10
ACSBG2	P1P2	0.0712623	-0.300917	-0.345194	10	P1P2	0.0288554	0.0373673	10	P1P2	0.314103	-0.434681	10
ACSF2	P1P2	0.861943	-0.0313059	-0.0020199	10	P1P2	0.566299	-0.0491145	10	P1P2	0.707613	0.0127532	10
ACSF3	P1P2	0.047795	-0.241634	-0.319106	10	P1P2	0.498153	-0.0291586	10	P1P2	0.0316988	-0.545225	10
ACSL1	P1P2	0.58975	-0.00110394	-0.000253169	10	P1P2	0.340336	-0.0295315	10	P1P2	0.831723	-0.0599535	10
ACSL3	P1P2	0.64592	0.0906454	0.0172064	10	P1P2	0.801833	-0.00847243	10	P1P2	0.487483	0.0973653	10
ACSL4	P1P2	0.0922651	0.0566794	0.0586611	10	P1P2	4.46732e-05	-0.156831	10	P1P2	0.587781	-0.277415	10
ACSL5	P1	0.120662	-0.206771	-0.189904	9	P1	0.149111	0.0512025	9	P1	0.335482	-0.342873	9
ACSL6	P2	0.050826	0.322381	0.417134	10	P1	0.312601	-0.0455217	10	P2	0.0316404	0.711845	10
ACSM1	P1P2	0.524868	0.0742614	0.0207895	10	P1P2	0.931965	-0.00940453	10	P1P2	0.55772	0.126381	10
ACSM2A	P1P2	0.149536	0.0915318	0.0755372	10	P1P2	0.504231	0.00375727	10	P1P2	0.0960817	0.196931	10
ACSM2B	P1P2	0.809623	-0.032568	-0.00298705	10	P1P2	0.130192	0.0329322	10	P1P2	0.526119	0.00355443	10
ACSM3	P1P2	0.198408	-0.164007	-0.115205	10	P1P2	0.228689	0.0421946	10	P1P2	0.440509	-0.141318	10
ACSM4	ENST00000399422.4	0.414422	-0.147084	-0.0562678	10	ENST00000399422.4	0.845055	-0.0039163	10	ENST00000399422.4	0.412929	-0.445552	10
ACSM5	P1P2	0.35483	0.0171645	0.00772369	9	P1P2	0.952311	-0.0309258	10	P1P2	0.549046	-0.17364	10
ACSS1	P1P2	0.328185	-0.204523	-0.0989647	9	P1P2	0.523079	-0.0487425	10	P1P2	0.175868	-0.262212	10
ACSS2	P1P2	0.848913	0.0707809	0.00503514	10	P1P2	0.579601	-0.0038411	10	P1P2	0.996828	0.0198702	10
ACSS3	P1P2	0.503036	-0.0806607	-0.0240692	9	P1P2	0.166273	-0.0448618	9	P1P2	0.219981	-0.216152	9
ACTA1	P2	0.0565607	0.155249	0.193671	10	P1	0.12967	-0.093989	10	P2	0.138576	0.31006	10
ACTA2	P1	0.275534	0.156623	0.0876813	10	P1	0.358803	-0.0471595	10	P2	0.397557	0.0594717	10
ACTB	P1P2	0.740267	-0.0236639	-0.00309078	9	P1P2	0.105164	-0.0678358	10	P1P2	0.658015	-0.273177	10
ACTBL2	P1P2	0.641243	-0.0323552	-0.00624381	10	P1P2	0.240607	0.013609	10	P1P2	0.471199	0.0160598	10
ACTC1	P1P2	0.310344	0.0960271	0.0487968	10	P1P2	0.626597	-0.0558176	10	P1P2	0.390367	0.0713501	10
ACTG1	P1P2	0.522868	-0.0669103	-0.0188425	9	P1P2	0.130378	-0.0676042	10	P1P2	0.160202	-0.300939	10
ACTG2	P2	0.320781	0.120069	0.0592888	10	P1	0.2645	-0.0277846	9	P2	0.217087	0.429516	10
ACTL10	P1P2	0.780576	-0.0923331	-0.00993364	10	P1P2	0.144976	-0.0278621	10	P1P2	0.465328	-0.20546	10
ACTL6A	P1P2	0.0021022	0.280024	0.749715	9	P1P2	0.00168702	-0.191575	10	P1P2	0.411083	0.202259	10
ACTL6B	P1P2	0.349923	-0.19205	-0.0875803	10	P1P2	0.297839	-0.0266467	10	P1P2	0.253034	-0.417892	10
ACTL7A	P1P2	0.29232	0.163536	0.0873515	10	P1P2	0.818463	-0.0247761	10	P1P2	0.456198	0.222641	10
ACTL7B	P1P2	0.127275	0.151187	0.135351	10	P1P2	0.0693859	-0.0793679	10	P1P2	0.546497	0.213715	10
ACTL8	P1P2	0.997871	-0.0869796	-8.0516e-05	10	P1P2	0.564212	-0.00302059	10	P1P2	0.977679	-0.000823197	10
ACTL9	P1P2	0.841601	-0.0578316	-0.00433122	10	P1P2	0.619221	-0.0270902	10	P1P2	0.629198	-0.00340835	10
ACTN1	P1P2	0.25992	-0.22797	-0.133399	10	P1P2	0.501982	-0.00082705	10	P1P2	0.375513	-0.442433	10
ACTN2	P1P2	0.454944	-0.0879571	-0.030085	10	P1P2	0.541601	0.027903	10	P1P2	0.77772	-0.187048	10
ACTN3	P1P2	0.0732611	-0.312267	-0.354463	10	P1P2	0.719392	-0.00635222	10	P1P2	0.0522051	-0.620767	10
ACTN4	P1P2	0.481674	-0.158595	-0.0503138	10	P1P2	0.118119	0.036009	10	P1P2	0.877237	-0.059044	10
ACTR10	P1P2	0.182743	0.259161	0.191302	10	P1P2	0.97386	-0.0314241	10	P1P2	0.1303	0.570339	10
ACTR1A	P1P2	0.00843798	0.247508	0.513272	10	P1P2	0.316419	-0.0537093	10	P1P2	0.0293781	0.421335	10
ACTR1B	P1P2	0.377157	0.132911	0.0562847	10	P1P2	0.163042	0.0392233	10	P1P2	0.263892	0.426446	10
ACTR2	P1P2	0.118078	0.183279	0.170052	10	P1P2	0.562029	-0.0476194	10	P1P2	0.0907645	0.274431	9
ACTR3	P1P2	0.254442	0.0769883	0.0457627	10	P1P2	0.430928	-0.0279037	10	P1P2	0.310506	0.246614	10
ACTR3B	P1P2	0.575915	-0.0110018	-0.00263648	10	P1P2	0.407413	0.0255453	10	P1P2	0.775462	0.091468	10
ACTR3C	P1P2	0.0755978	-0.170085	-0.190748	10	P1P2	0.782582	-0.0258573	10	P1P2	0.0423776	-0.367919	10
ACTR5	P1P2	0.582641	0.0248135	0.0058212	9	P1P2	6.35308e-05	-0.190494	10	P1P2	0.196396	-0.874436	10
ACTR6	P1P2	0.595696	0.0324585	0.00730235	10	P1P2	0.303052	-0.0859291	10	P1P2	0.939197	-0.189881	10
ACTR8	P1P2	0.385967	-0.159022	-0.0657477	8	P1P2	0.00833158	-0.200783	10	P1P2	0.0122403	-0.837674	10
ACTRT1	P1P2	0.0800695	-0.336378	-0.36885	10	P1P2	0.966713	-0.00191799	10	P1P2	0.0790561	-0.655856	10
ACTRT2	P1P2	0.547728	-0.119503	-0.0312423	10	P1P2	0.839767	-0.00872061	10	P1P2	0.52535	-0.294066	10
ACTRT3	P1P2	0.060655	-0.262516	-0.319517	10	P1P2	0.259913	-0.0565213	10	P1P2	0.0151095	-0.474533	10
ACVR1	P1P2	0.860545	0.047572	0.00310295	10	P1P2	0.0617124	-0.0602713	10	P1P2	0.912876	-0.107483	10
ACVR1B	P1P2	0.324625	-0.130928	-0.0639737	10	P1P2	0.1547	-0.0594631	10	P1P2	0.156984	-0.409404	10
ACVR1C	P1P2	0.10892	0.133825	0.128859	10	P1P2	0.0736845	0.0460568	10	P1P2	0.0455906	0.438407	10
ACVR2A	P1P2	0.710579	-0.0234569	-0.00348072	10	P1P2	0.0189505	0.0592008	10	P1P2	0.712437	0.203132	10
ACVR2B	P1P2	0.33152	0.0809101	0.0387956	9	P1P2	0.00765692	-0.09952	10	P1P2	0.731627	-0.0393982	10
ACVRL1	P1P2	0.241696	-0.245242	-0.151249	10	P1P2	0.999883	-0.024661	10	P1P2	0.196039	-0.565769	10
ACY1	P1P2	0.962398	-0.104845	-0.00174518	10	P1P2	0.424593	0.0146119	10	P1P2	0.711779	-0.196668	10
ACY3	P1	0.21873	-0.203567	-0.134373	10	P2	0.162644	0.0313545	10	P1	0.340193	-0.192171	10
ACYP1	P2	0.571434	0.0869288	0.0211267	9	P2	0.212149	-0.0451621	10	P2	0.664526	0.0771736	10
ACYP2	P1P2	0.801566	-0.0255966	-0.00245883	9	P1P2	0.730633	-0.0511998	10	P1P2	0.538882	-0.0614026	10
ADA	P1P2	0.512191	-0.170033	-0.0494063	10	P1P2	0.219397	-0.00910684	10	P1P2	0.40549	-0.117897	10
ADAD1	P1P2	0.320636	0.071168	0.0351561	10	P1P2	0.484644	0.0184526	10	P1P2	0.242789	0.211674	10
ADAD2	P1P2	0.120788	0.115583	0.106102	10	P1P2	0.924258	0.000562159	10	P1P2	0.089115	0.197146	10
ADAL	P1P2	0.0350785	0.190029	0.276485	8	P1P2	0.0233091	-0.0721967	10	P1P2	0.316872	0.192413	10
ADAM10	P1P2	0.0335933	-0.295952	-0.436158	10	P1P2	0.488602	-0.0779918	10	P1P2	0.0158557	-0.727309	10
ADAM11	P1P2	0.431062	0.108544	0.0396684	10	P1P2	0.817207	-0.0187397	10	P1P2	0.480127	0.208393	10
ADAM12	P1P2	0.430022	-0.144876	-0.0530983	10	P1P2	0.476872	-0.0205127	10	P1P2	0.382936	-0.425496	10
ADAM15	P1P2	0.884015	-0.105359	-0.00564095	10	P1P2	0.606944	-0.0454225	10	P1P2	0.679781	-0.184278	10
ADAM17	P1P2	0.811692	0.0173555	0.00157256	10	P1P2	0.730191	0.021867	10	P1P2	0.59725	0.0598285	10
ADAM18	P1P2	0.352374	-0.197387	-0.0894155	10	P1P2	0.691342	0.00370312	10	P1P2	0.390774	-0.386728	10
ADAM19	P1P2	0.725762	-0.00906055	-0.00126128	10	P1P2	0.297635	-0.0171127	10	P1P2	0.893632	-0.269343	10
ADAM2	P1P2	0.386518	0.0638797	0.0263715	10	P1P2	0.900486	-0.0129558	10	P1P2	0.308403	0.123125	10
ADAM20	P1P2	0.754646	-0.069243	-0.00846541	10	P1P2	0.822805	-0.0155041	10	P1P2	0.709695	-0.159534	10
ADAM21	P1P2	0.997161	-0.082178	-0.000101464	10	P1P2	0.951024	-0.0135534	10	P1P2	0.944001	-0.141968	10
ADAM22	P1P2	0.269702	-0.128711	-0.0732516	10	P1P2	0.277786	0.0045853	10	P1P2	0.376466	-0.324658	10
ADAM23	P1P2	0.529089	-0.0260495	-0.00720193	9	P1P2	0.495547	-0.0528006	10	P1P2	0.3367	-0.385288	10
ADAM28	P1P2	0.750144	-0.0490804	-0.00612793	10	P1P2	0.134652	0.0526233	10	P1P2	0.409158	0.132314	10
ADAM29	P1P2	0.6112	-0.000718273	-0.000153579	10	P1P2	0.432391	0.0100623	10	P1P2	0.453444	0.132848	10
ADAM30	P1P2	0.943151	0.109875	0.00279288	10	P1P2	0.76044	0.00971312	10	P1P2	0.820025	0.198401	10
ADAM32	P1P2	0.373802	0.0570788	0.0243931	10	P1P2	0.895951	-0.0255779	10	P1P2	0.444271	0.086822	10
ADAM33	P1P2	0.560138	-0.0780952	-0.019657	10	P1P2	0.852078	-0.0211558	10	P1P2	0.430196	-0.135667	10
ADAM7	P1P2	0.0989603	0.211118	0.212076	10	P1P2	0.808315	0.0159061	10	P1P2	0.0433604	0.477296	10
ADAM8	P1P2	0.810083	0.0661152	0.00604759	10	P1P2	0.857842	-0.00171956	10	P1P2	0.803693	0.0356176	10
ADAM9	P1P2	0.784903	0.000305709	3.21556e-05	10	P1P2	0.684312	-0.0162086	10	P1P2	0.898642	0.0342353	10
ADAMDEC1	P1P2	0.380208	-0.117573	-0.049378	10	P1P2	0.278241	0.0228797	10	P1P2	0.515031	-0.0948901	10
ADAMTS1	P1	0.13223	0.0886302	0.0778768	10	P2	0.48107	-0.00963313	10	P1	0.0937222	0.108939	10
ADAMTS10	P1P2	0.393713	0.121602	0.0492272	10	P1P2	0.407663	-0.0462636	10	P1P2	0.608951	0.0623341	10
ADAMTS12	P1P2	0.286516	0.0992659	0.0538866	10	P1P2	0.518214	0.0170653	10	P1P2	0.177945	0.418295	10
ADAMTS13	P1P2	0.413236	-0.112949	-0.0433501	10	P1P2	0.752507	-0.0214491	10	P1P2	0.38382	-0.333402	10
ADAMTS14	P1P2	0.391415	0.0687924	0.0280235	10	P1P2	0.0568445	-0.082626	10	P1P2	0.965702	-0.0704424	10
ADAMTS15	P1P2	0.35553	-0.142281	-0.0639019	10	P1P2	0.597323	0.00800308	10	P1P2	0.457802	-0.111576	10
ADAMTS16	P1	0.101658	-0.159669	-0.158529	9	P1	0.12589	0.0218045	9	P1	0.374646	-0.171004	8
ADAMTS17	P1P2	0.342786	-0.1726	-0.0802549	10	P1P2	0.424508	0.0223545	10	P1P2	0.449109	-0.253786	10
ADAMTS18	P1P2	0.753182	-0.0327379	-0.00403003	10	P1P2	0.610646	-0.00696362	10	P1P2	0.642853	0.0926732	10
ADAMTS19	P1P2	0.185387	0.0367758	0.026917	10	P1P2	0.491837	-0.00895288	10	P1P2	0.199474	0.283606	10
ADAMTS2	P1P2	0.361973	0.0927421	0.0409293	10	P1P2	0.110341	-0.0419332	10	P1P2	0.653653	0.131663	10
ADAMTS20	P1P2	0.395689	-0.050271	-0.0202414	10	P1P2	0.161893	-0.0569251	10	P1P2	0.233012	-0.423263	10
ADAMTS3	P1P2	0.709696	-0.0724587	-0.0107911	10	P1P2	0.556888	-0.0118993	10	P1P2	0.789713	-0.0176178	10
ADAMTS4	P1P2	0.408884	-0.152553	-0.0592515	9	P1P2	0.220834	-0.0892869	10	P1P2	0.0991806	-0.32272	10
ADAMTS5	P1P2	0.913582	-0.107758	-0.00422977	10	P1P2	0.447355	-0.0379194	10	P1P2	0.829656	-0.347593	10
ADAMTS6	P1P2	0.755548	-0.0818067	-0.00995899	10	P1P2	0.868701	-0.0332306	10	P1P2	0.849454	-0.183141	10
ADAMTS7	P1P2	0.0421272	-0.272309	-0.374544	10	P1P2	0.019123	0.0405163	10	P1P2	0.110133	-0.38293	10
ADAMTS8	P1P2	0.0603706	0.124897	0.152272	10	P1P2	0.879816	-0.0128748	10	P1P2	0.0642722	0.0836014	10
ADAMTS9	P1P2	0.794492	-0.033753	-0.00337228	10	P1P2	0.110243	0.0330589	10	P1P2	0.387449	0.111858	10
ADAMTSL1	P1P2	0.353219	0.212682	0.0961228	10	P1P2	0.838619	0.00358714	10	P1P2	0.279756	0.435275	10
ADAMTSL2	P1P2	0.251493	0.134923	0.0808826	9	P1P2	0.434131	0.00291341	9	P1P2	0.141603	0.259117	9
ADAMTSL3	P1P2	0.989946	-0.0644008	-0.000282632	10	P1P2	0.265927	-0.004231	10	P1P2	0.933692	-0.0975934	10
ADAMTSL4	P1P2	0.889499	0.0158589	0.0008065	8	P1P2	0.716986	-0.0133278	9	P1P2	0.892317	0.091522	9
ADAMTSL5	P1P2	0.163936	-0.186054	-0.146113	9	P1P2	0.0920503	0.00221935	10	P1P2	0.379573	-0.232101	10
ADAP1	P1P2	0.938668	0.0470284	0.00129271	10	P1P2	0.480156	-0.0136901	10	P1P2	0.985784	-0.0163402	10
ADAP2	P1P2	0.530974	-0.0912403	-0.0250844	10	P1P2	0.247687	-0.0582607	10	P1P2	0.208598	-0.307779	10
ADAR	P2	0.609434	-0.111407	-0.0239607	10	P1	0.00605374	-0.133911	9	P1	0.136013	-0.345892	9
ADARB1	P1P2	0.981667	-0.0402177	-0.000323185	10	P1P2	0.761671	0.00543655	10	P1P2	0.855459	-0.0561819	10
ADARB2	ENST00000381312.1	0.103467	-0.326017	-0.321191	9	ENST00000381312.1	0.417215	-0.0416754	10	ENST00000381312.1	0.0622829	-0.759765	10
ADAT1	P1P2	0.106487	0.220564	0.214544	10	P1P2	0.139386	-0.0342848	10	P1P2	0.234284	0.399511	10
ADAT2	P1P2	0.618847	0.106818	0.0222626	9	P1P2	0.0568828	-0.0979989	10	P1P2	0.554263	-0.0870851	10
ADAT3	P2	0.378386	-0.207554	-0.0876013	9	P1	0.215179	-0.0447498	10	P2	0.140232	-0.451937	10
ADC	P1P2	0.936782	0.0816292	0.00231514	10	P1P2	0.748383	-0.020585	10	P1P2	0.817851	0.226116	10
ADCK1	P1P2	0.049902	-0.273946	-0.356645	10	P1P2	0.687553	0.010607	10	P1P2	0.0590082	-0.490863	10
ADCK2	P1P2	0.711904	-0.138825	-0.0204876	10	P1P2	0.236683	0.0214265	10	P1P2	0.820254	-0.126797	10
ADCK3	P1P2	0.052428	0.159848	0.204675	10	P1P2	0.976203	-0.00942331	10	P1P2	0.053942	0.351451	10
ADCK4	P1P2	0.397754	-0.00905897	-0.00362708	10	P1P2	0.795591	-0.00708914	10	P1P2	0.477567	-0.239751	10
ADCK5	P1P2	0.607566	-0.00140723	-0.000304534	10	P1P2	0.343097	-0.0113083	10	P1P2	0.59991	-0.145284	10
ADCY1	P1P2	0.541427	-0.10049	-0.0267765	10	P1P2	0.353747	-0.0278623	10	P1P2	0.408907	-0.238147	10
ADCY10	P1P2	0.492433	0.101975	0.0313728	9	P1P2	0.619769	0.00303281	9	P1P2	0.398723	0.243865	9
ADCY2	P1P2	0.637255	-0.0938241	-0.0183601	9	P1P2	0.623372	-0.0843561	10	P1P2	0.409659	-0.411013	10
ADCY3	P1P2	0.429762	-0.131648	-0.0482847	10	P1P2	0.15107	-0.0180388	10	P1P2	0.767015	-0.183382	10
ADCY4	P1P2	0.399992	-0.224924	-0.0895084	10	P1P2	0.683125	-0.00623047	10	P1P2	0.55446	-0.498096	10
ADCY5	P1P2	0.0218884	-0.355099	-0.589389	10	P1P2	0.855651	0.017765	10	P1P2	0.0620353	-0.600008	10
ADCY6	P1P2	0.0486354	-0.314815	-0.413366	10	P1P2	0.499459	0.0229634	10	P1P2	0.0746358	-0.587341	10
ADCY7	P1P2	0.900776	-0.0139394	-0.000632616	10	P1P2	0.804333	0.00735099	10	P1P2	0.878398	0.00945975	10
ADCY8	P1P2	0.666488	-0.0643443	-0.011338	10	P1P2	0.467186	-0.0175181	10	P1P2	0.851879	-0.130342	10
ADCY9	P1P2	0.276711	-0.230124	-0.128403	10	P1P2	0.628264	0.00609434	10	P1P2	0.397886	-0.467588	10
ADCYAP1	P1P2	0.778756	0.0463317	0.00503156	10	P1P2	0.36406	-0.0293652	10	P1P2	0.959247	-0.0730191	10
ADCYAP1R1	P1P2	0.0163385	-0.240433	-0.429603	10	P1P2	0.179687	0.0431651	10	P1P2	0.0691741	-0.487456	9
ADD1	P1P2	0.240446	0.21403	0.132481	10	P1P2	0.94342	-0.00375934	10	P1P2	0.26157	0.461508	10
ADD2	P1P2	0.550496	0.0623256	0.0161577	10	P1P2	0.78168	0.0129407	10	P1P2	0.463889	0.0849957	10
ADD3	P1P2	0.407379	-0.0763809	-0.0297887	9	P1P2	0.572281	-0.0151514	10	P1P2	0.323539	-0.368147	10
ADGB	P1P2	0.960609	0.0790614	0.00137988	9	P1P2	0.0903051	-0.0803521	10	P1P2	0.361633	-0.0895954	10
ADH1A	P1P2	0.76458	-0.0157047	-0.00183082	10	P1P2	0.673872	0.0263647	10	P1P2	0.568955	-0.00993825	10
ADH1B	P1P2	0.176494	-0.282031	-0.212445	10	P1P2	0.954418	-0.0164914	10	P1P2	0.143025	-0.784211	10
ADH1C	P1P2	0.172302	-0.244325	-0.186594	8	P1P2	0.474281	-0.0252359	9	P1P2	0.0604475	-0.468728	9
ADH4	P1P2	0.748348	-0.0971	-0.0122245	8	P1P2	0.0709996	0.0167201	9	P1P2	0.874794	0.107668	9
ADH5	P1P2	0.901011	-0.0416838	-0.00188703	10	P1P2	0.923325	-0.0180763	10	P1P2	0.982612	-0.2074	10
ADH6	P1P2	0.56966	-0.0715346	-0.0174819	10	P1P2	0.0272384	-0.0838955	10	P1P2	0.169927	-0.345984	10
ADH7	P1P2	0.0620317	0.0891816	0.107677	10	P1P2	0.84333	0.00893264	10	P1P2	0.0446121	0.22281	10
ADHFE1	P1P2	0.528578	-0.0656219	-0.0181701	9	P1P2	0.307174	0.00587941	9	P1P2	0.725468	-0.123557	9
ADI1	P1P2	0.294636	0.0714973	0.0379446	10	P1P2	0.156325	0.0342923	10	P1P2	0.101188	0.278759	10
ADIG	P1P2	0.100578	-0.0852265	-0.0850131	10	P1P2	0.0642939	-0.0601073	10	P1P2	0.0396828	-0.541543	10
ADIPOQ	P1P2	0.356356	0.0615292	0.0275722	7	P1P2	0.298016	-0.0986638	8	P1P2	0.984627	-0.0548311	8
ADIPOR1	P1P2	0.241696	-0.217568	-0.134181	10	P1P2	0.0568828	-0.016325	10	P1P2	0.0821713	-0.480444	10
ADIPOR2	P1P2	0.991247	0.02716	0.000103703	10	P1P2	0.0540546	-0.0448419	10	P1P2	0.813456	-0.0712843	9
ADIRF	P1P2	0.546104	0.0228453	0.00600201	9	P1P2	0.812286	-0.0140605	9	P1P2	0.510987	0.0701456	9
ADK	P2	0.289476	-0.158139	-0.0851402	10	P2	0.0613041	0.0455911	10	P1	0.406156	-0.126336	10
ADM	P1P2	0.436286	-0.0810205	-0.0291859	10	P1P2	0.197103	0.0508376	10	P1P2	0.837876	-0.22388	9
ADM2	P1P2	0.902184	0.0884913	0.00395597	10	P1P2	0.131465	0.0201249	10	P1P2	0.946111	0.255485	10
ADM5	P1P2	0.843637	0.0108653	0.000802341	9	P1P2	0.0524621	0.0430492	9	P1P2	0.669099	0.0971513	9
ADNP	P1P2	0.530391	-0.0707239	-0.0194776	10	P1P2	0.00948797	-0.122669	10	P1P2	0.142182	-0.559717	10
ADNP2	P1P2	0.255456	-0.118142	-0.070021	9	P1P2	0.367019	-0.0370097	10	P1P2	0.149818	-0.348333	10
ADO	P1P2	0.0445544	-0.394129	-0.532512	10	P1P2	0.327691	0.0125379	10	P1P2	0.106317	-0.822367	10
ADORA1	P1P2	0.417822	-0.208554	-0.0790439	10	P1P2	0.222891	0.0266178	10	P1P2	0.6245	-0.203043	10
ADORA2A	P1P2	0.674267	0.0369792	0.00632966	10	P1P2	0.920991	0.0121739	10	P1P2	0.529777	0.118446	10
ADORA2B	P1P2	0.319194	-0.112417	-0.0557529	10	P1P2	0.741377	-0.0123565	10	P1P2	0.555743	-0.258467	10
ADORA3	P1	0.158703	-0.133735	-0.10691	10	P1	0.859458	0.0060843	10	P1	0.159943	-0.20092	9
ADPGK	P1P2	0.594361	-0.0602542	-0.0136144	10	P1P2	0.953598	-0.0137542	10	P1P2	0.562778	-0.119683	10
ADPRH	P1P2	0.967952	-0.00568817	-8.04654e-05	10	P1P2	0.384279	-0.041345	10	P1P2	0.808596	-0.143205	10
ADPRHL1	P1	0.141901	-0.250472	-0.212404	10	P2	0.180403	0.0247117	10	P1	0.201337	-0.192088	10
ADPRHL2	P1P2	0.839051	0.0303443	0.00231259	10	P1P2	0.128374	-0.0802479	10	P1P2	0.46084	-0.165758	10
ADPRM	P1P2	0.368817	0.0546018	0.0236529	9	P1P2	0.14057	-0.0777232	10	P1P2	0.997885	0.0332686	10
ADRA1A	P1P2	0.190658	-0.113656	-0.081803	10	P1P2	0.0907529	0.0567769	10	P1P2	0.420788	-0.145488	10
ADRA1B	P1P2	0.673076	0.0603382	0.0103743	10	P1P2	0.579902	-0.0277261	10	P1P2	0.657483	0.161622	10
ADRA1D	P1P2	0.742623	0.0526837	0.0068084	10	P1P2	0.632546	-0.0174073	10	P1P2	0.85754	0.0113471	10
ADRA2A	P1P2	0.31247	-0.00943901	-0.00476851	10	P1P2	0.615495	0.0116783	10	P1P2	0.455575	-0.175339	10
ADRA2B	P1P2	0.56822	-0.118021	-0.0289722	8	P1P2	0.743932	-0.0269464	10	P1P2	0.441295	-0.411996	10
ADRA2C	P1P2	0.123438	0.114401	0.103939	10	P1P2	0.311546	-0.0793633	10	P1P2	0.304295	0.0433495	10
ADRB1	P1P2	0.403821	0.10412	0.0410035	10	P1P2	0.114296	-0.03262	10	P1P2	0.607406	0.029544	10
ADRB2	P1P2	0.519759	-0.168626	-0.0479232	10	P1P2	0.731739	-0.0219153	10	P1P2	0.305058	-0.20418	10
ADRB3	P1P2	0.43751	-0.162761	-0.058433	10	P1P2	0.474236	-0.011672	10	P1P2	0.363496	-0.355746	10
ADRBK1	P1P2	0.888581	-0.0229786	-0.00117887	10	P1P2	0.37235	-0.017364	10	P1P2	0.719475	-0.124048	10
ADRBK2	P1P2	0.60653	-0.0119199	-0.00258839	10	P1P2	0.456454	0.0188678	10	P1P2	0.393871	0.10644	10
ADRM1	P1P2	0.641137	-0.132811	-0.0256391	10	P1P2	0.941549	0.00294969	10	P1P2	0.684427	-0.249997	10
ADSL	P1P2	0.0558917	0.317448	0.397652	10	P1P2	0.00275147	-0.14964	10	P1P2	0.90984	0.176446	10
ADSS	P1P2	0.882559	0.0587938	0.00318992	8	P1P2	0.00589563	-0.158331	10	P1P2	0.181095	-0.172037	10
ADSSL1	P1P2	0.681864	-0.0120942	-0.00201129	10	P1P2	0.923792	-0.0315562	10	P1P2	0.854304	-0.0728511	10
ADTRP	P1P2	0.588421	0.0486621	0.0112075	10	P1P2	0.678062	0.0102866	10	P1P2	0.44392	0.159942	10
AEBP1	P1P2	0.172869	-0.201382	-0.15351	10	P1P2	0.287195	0.0119625	10	P1P2	0.278382	-0.406095	10
AEBP2	P1P2	0.879452	-0.132839	-0.00741081	10	P1P2	0.016835	-0.0585122	10	P1P2	0.402504	-0.368161	10
AEN	P1P2	0.890807	-0.0789584	-0.003965	10	P1P2	0.318196	0.0382782	10	P1P2	0.925734	-0.348146	10
AES	P1P2	0.761415	-0.0328969	-0.00389429	10	P1P2	0.227612	-0.0296875	10	P1P2	0.533836	-0.26607	10
AFAP1	P1P2	0.48752	-0.0635699	-0.0198343	9	P1P2	0.318688	0.0193461	9	P1P2	0.60757	-0.0288941	9
AFAP1L1	P1P2	0.0530079	-0.223193	-0.284718	8	P1P2	0.0697237	0.0409001	8	P1P2	0.153824	-0.291329	8
AFAP1L2	P1P2	0.491798	0.12331	0.0380057	10	P1P2	0.189359	-0.0785781	10	P1P2	0.682805	-0.104666	10
AFF1	P1P2	0.105908	-0.185095	-0.180481	9	P1P2	0.233977	0.023381	9	P1P2	0.291338	-0.286402	9
AFF2	P1P2	0.602496	-0.0652208	-0.0143516	10	P1P2	0.441578	0.027477	10	P1P2	0.783484	-0.0247375	10
AFF3	P1P2	0.643686	0.0719505	0.013766	10	P1P2	0.0337534	-0.0731521	10	P1P2	0.81202	-0.0970215	10
AFF4	P1P2	0.661859	-0.0891826	-0.0159846	10	P1P2	0.468808	-0.0265808	10	P1P2	0.523335	-0.358754	10
AFG3L2	P1P2	0.853329	-0.0445499	-0.00306875	10	P1P2	1.56369e-06	-0.174438	10	P1P2	0.00786076	-0.701529	10
AFM	P1P2	0.159977	-0.165791	-0.13196	10	P1P2	0.514605	-0.0140563	10	P1P2	0.130524	-0.367883	10
AFMID	P1P2	0.73848	-0.0226534	-0.00298258	10	P1P2	0.234826	0.0410067	10	P1P2	0.962064	-0.0090699	10
AFP	P2	0.0456348	-0.306114	-0.410409	10	P2	0.685392	0.0131158	10	P2	0.0574833	-0.399991	10
AFTPH	P1P2	0.158265	0.192552	0.15416	10	P1P2	0.0406833	-0.0550363	10	P1P2	0.542976	0.156641	10
AGA	P1P2	0.319987	-0.119262	-0.0590189	10	P1P2	0.705153	-0.0306329	10	P1P2	0.180951	-0.354966	10
AGAP1	P1P2	0.528349	0.0556384	0.0154162	8	P1P2	0.293299	-0.0647947	9	P1P2	0.95741	-0.067242	9
AGAP10	ENST00000413193.2	0.600019	-0.0967002	-0.0214515	10	ENST00000413193.2	0.548141	-0.0264424	10	ENST00000413193.2	0.541609	-0.2925	10
AGAP11	P1P2	0.245852	-0.145197	-0.0884726	9	P1P2	0.424167	-0.02561	10	P1P2	0.152967	-0.298224	10
AGAP2	P1P2	0.284777	0.181175	0.0988302	10	P1P2	0.7271	0.00314	10	P1P2	0.268833	0.397619	10
AGAP3	P1P2	0.100241	0.188621	0.188424	10	P1P2	0.251129	0.0224319	10	P1P2	0.043056	0.547739	10
AGAP9	ENST00000453919.1	0.600019	-0.0967002	-0.0214515	10	ENST00000453919.1	0.548141	-0.0264424	10	ENST00000453919.1	0.541609	-0.2925	10
AGBL1	ENST00000441037.2	0.654458	-0.162887	-0.0299905	10	ENST00000421325.2	0.884222	7.75099e-05	10	ENST00000441037.2	0.745072	-0.352124	10
AGBL2	P1P2	0.964407	-0.0498464	-0.00078457	10	P1P2	0.609823	-0.0462358	10	P1P2	0.733511	-0.100224	10
AGBL3	P1P2	0.965841	-0.00480954	-7.25962e-05	9	P1P2	0.32041	0.0238312	10	P1P2	0.680441	-0.0196534	9
AGBL4	P1P2	0.201582	-0.185201	-0.128816	10	P1P2	0.311195	0.0210765	10	P1P2	0.382695	-0.378397	10
AGBL5	P2	0.0348502	0.147066	0.214392	10	P2	0.0091921	-0.0455433	10	P2	0.142944	0.192085	10
AGER	P1P2	0.468902	-0.0887737	-0.0291993	9	P1P2	0.740846	-0.0360071	9	P1P2	0.264735	-0.335397	9
AGFG1	P1P2	0.278943	-0.152328	-0.0844633	10	P1P2	0.00745188	-0.0843131	10	P1P2	0.0713393	-0.465327	10
AGFG2	P1P2	0.339757	-0.100937	-0.0473226	9	P1P2	0.976789	-0.0233842	10	P1P2	0.367318	-0.205422	10
AGGF1	P1P2	0.112769	0.309947	0.293771	10	P1P2	0.172643	-0.03901	10	P1P2	0.156596	0.557988	10
AGK	P1P2	0.0511476	-0.2439	-0.314917	9	P1P2	0.0566536	-0.0957208	10	P1P2	0.0133309	-0.479259	10
AGL	P1P2	0.686764	0.0547413	0.00893335	10	P1P2	0.791512	-0.0146624	10	P1P2	0.747191	-0.054941	10
AGMAT	P1P2	0.109346	0.231832	0.222836	10	P1P2	0.549218	-0.0400593	10	P1P2	0.121276	0.336669	10
AGMO	P1P2	0.772963	-0.0533839	-0.00597053	10	P1P2	0.356499	-0.0377264	10	P1P2	0.933107	-0.0907016	10
AGO1	P1P2	0.621005	0.0546819	0.0113139	10	P1P2	0.117498	0.00411863	10	P1P2	0.27539	0.221613	10
AGO2	P1P2	0.0177746	0.217381	0.38046	10	P1P2	0.112821	-0.0381812	10	P1P2	0.0579295	0.350176	10
AGO3	P1P2	0.211543	0.230122	0.155241	10	P1P2	0.175108	-0.0382007	10	P1P2	0.33463	0.397344	10
AGO4	P1P2	0.207079	-0.217432	-0.148694	10	P1P2	0.957227	0.00603713	10	P1P2	0.250597	-0.360706	10
AGPAT1	P1	0.26829	0.0854004	0.0487974	10	P2	0.565503	0.0102926	10	P1	0.210094	0.20544	10
AGPAT2	P1P2	0.14845	0.190292	0.157642	10	P1P2	0.776269	0.0183177	10	P1P2	0.133777	0.45214	10
AGPAT3	P1P2	0.0291316	0.225969	0.347006	10	P1P2	0.94494	-0.0164284	10	P1P2	0.0383702	0.662691	10
AGPAT4	P1P2	0.310495	0.069048	0.0350726	8	P1P2	0.108615	-0.0926989	10	P1P2	0.875264	-0.135478	10
AGPAT5	P1P2	0.534089	-0.125308	-0.0341321	10	P1P2	0.589596	0.0249868	10	P1P2	0.626899	-0.0873511	10
AGPAT6	P1P2	0.299444	-0.10231	-0.0535783	10	P1P2	0.439836	-0.0539469	10	P1P2	0.15441	-0.283557	10
AGPAT9	P1P2	0.343314	0.158439	0.0735644	10	P1P2	0.252041	0.0193121	10	P1P2	0.109512	0.416625	10
AGPS	P1P2	0.501562	0.126342	0.0378617	10	P1P2	0.000417693	-0.12964	10	P1P2	0.37472	-0.0811647	10
AGR2	P1P2	0.142183	-0.155626	-0.13184	10	P1P2	0.154317	0.00680169	10	P1P2	0.272226	-0.279871	10
AGR3	P1P2	0.203138	-0.231787	-0.160445	8	P1P2	0.382619	0.0188578	8	P1P2	0.329844	-0.45953	8
AGRN	P1P2	0.26567	-0.0933794	-0.0537545	10	P1P2	0.453351	-0.0874181	10	P1P2	0.135234	-0.449098	10
AGRP	P1P2	0.70864	0.0328823	0.00491834	7	P1P2	0.270852	-0.0860608	9	P1P2	0.589455	-0.275411	9
AGT	P1P2	0.0566289	0.21501	0.26811	9	P1P2	0.597833	-0.0421838	10	P1P2	0.0735155	0.446259	10
AGTPBP1	P1P2	0.0650998	-0.233146	-0.276609	10	P1P2	0.669907	0.0458678	10	P1P2	0.111253	-0.362199	10
AGTR1	P1P2	0.54382	-0.109673	-0.0290135	9	P1P2	0.258424	-0.00684443	10	P1P2	0.68486	-0.338418	10
AGTR2	P1P2	0.840351	0.0534617	0.00403844	8	P1P2	0.00160978	-0.122303	9	P1P2	0.265134	-0.421395	9
AGTRAP	P1P2	0.77666	0.0144885	0.00159039	9	P1P2	0.946929	-0.0150489	10	P1P2	0.825869	-0.0936851	10
AGXT	P1P2	0.0444287	0.212701	0.287643	10	P1P2	0.487772	-0.0035799	10	P1P2	0.0307637	0.624069	10
AGXT2	P1P2	0.936219	0.0370988	0.00106186	9	P1P2	0.879702	0.0317437	9	P1P2	0.659404	0.0417348	9
AHCTF1	P1P2	0.738927	0.139978	0.0183929	10	P1P2	0.447882	-0.0169247	10	P1P2	0.78405	0.0990389	10
AHCY	P1P2	0.488913	-0.131309	-0.0408068	8	P1P2	0.0357733	-0.179926	10	P1P2	0.0557646	-0.759565	10
AHCYL1	P2	0.651144	-0.0807192	-0.0150398	10	P1	0.0827525	-0.0607285	10	P1	0.454686	-0.0414107	10
AHCYL2	P1P2	0.887517	-0.100598	-0.0052133	9	P1P2	0.87018	-0.00452054	9	P1P2	0.865017	-0.178022	9
AHDC1	P1P2	0.779893	-0.136385	-0.0147248	10	P1P2	0.611161	-0.0190581	10	P1P2	0.987781	-0.288702	10
AHI1	P1P2	0.416035	-0.0348723	-0.0132818	10	P1P2	0.202931	0.0320586	10	P1P2	0.553277	0.224296	10
AHNAK	P1	0.0866579	0.162125	0.172208	9	P1	0.4923	-0.0240359	10	P1	0.248297	0.221322	10
AHNAK2	P2	0.160834	-0.151223	-0.120014	9	P1	0.0812795	-0.0620377	10	P2	0.319456	-0.312709	9
AHR	P1P2	0.207025	-0.225409	-0.154174	10	P1P2	0.10868	0.0238186	10	P1P2	0.36638	-0.253133	10
AHRR	P1P2	0.788096	0.0161835	0.00167372	10	P1P2	0.311476	-0.0420825	10	P1P2	0.82782	-0.033993	10
AHSA1	P1P2	0.995137	0.005123	1.08471e-05	9	P1P2	0.274158	0.0161758	10	P1P2	0.839312	-0.0153471	10
AHSA2	P1P2	0.575207	-0.0116119	-0.00278889	10	P1P2	0.999648	0.00592022	10	P1P2	0.696474	0.00548552	10
AHSG	P1P2	0.305491	-0.0804971	-0.0414561	10	P1P2	0.441927	-0.0431672	10	P1P2	0.210041	-0.316048	10
AHSP	P1P2	0.836387	-0.0298457	-0.00231581	10	P1P2	0.926943	0.00108622	10	P1P2	0.798116	-0.0442867	10
AICDA	P1P2	0.512382	-0.131612	-0.038221	10	P1P2	0.139701	-0.00566136	10	P1P2	0.592354	-0.178106	10
AIDA	P1P2	0.704562	0.0744948	0.0113292	9	P1P2	0.727321	-0.0184577	10	P1P2	0.834366	0.0515843	10
AIF1	P1P2	0.955192	0.0554193	0.00110336	10	P1P2	0.226538	0.0207548	10	P1P2	0.961594	0.0500684	10
AIF1L	P1P2	0.232522	-0.116475	-0.0737911	10	P1P2	0.18026	-0.0206215	10	P1P2	0.130076	-0.481078	10
AIFM1	P1P2	0.458261	-0.198436	-0.0672473	10	P1P2	0.716097	-0.00462022	10	P1P2	0.374403	-0.557153	10
AIFM2	P1P2	0.073071	0.0616945	0.0701007	10	P1P2	0.208618	-0.0337423	10	P1P2	0.101465	0.00876309	10
AIFM3	P2	0.323534	-0.127487	-0.0624786	10	P1	0.774806	-0.0179194	10	P2	0.26207	-0.232367	10
AIG1	P1P2	0.525006	-0.252724	-0.0707213	9	P1P2	0.709524	-0.00361946	10	P1P2	0.330809	-0.413505	10
AIM1	P1P2	0.0517109	-0.315042	-0.405275	10	P1P2	0.124112	0.037161	10	P1P2	0.101865	-0.584523	10
AIM1L	P2	0.0457096	0.237177	0.317816	9	P1	0.208102	0.0315721	9	P2	0.0823531	0.504106	10
AIM2	P1P2	0.853911	-0.0286937	-0.00196803	10	P1P2	0.461445	0.00915571	10	P1P2	0.705971	-0.0393463	10
AIMP1	P1P2	0.302006	-0.257393	-0.13384	10	P1P2	0.843675	-0.0172808	10	P1P2	0.262196	-0.501749	10
AIMP2	P1P2	0.821941	-0.0879392	-0.00748884	10	P1P2	0.333975	0.0326185	10	P1P2	0.892002	-0.167522	10
AIP	P1P2	0.454228	0.178666	0.0612333	10	P1P2	0.768286	-0.00312596	10	P1P2	0.531514	0.443908	10
AIPL1	P1P2	0.288397	0.147739	0.0797804	10	P1P2	0.522888	0.0226159	10	P1P2	0.245113	0.374986	10
AIRE	P1P2	0.17907	0.0926163	0.0691822	10	P1P2	0.985228	-0.0111981	10	P1P2	0.288628	0.235063	10
AJAP1	P1P2	0.540053	-0.186384	-0.0498696	10	P1P2	0.897928	-0.00335998	10	P1P2	0.640218	-0.20453	10
AJUBA	P1P2	0.322228	-0.0483496	-0.0237801	10	P1P2	0.0926475	-0.0593967	10	P1P2	0.150318	-0.375141	10
AK1	P1P2	0.291709	-0.210176	-0.112455	10	P1P2	0.816522	-0.0160588	10	P1P2	0.316302	-0.388687	10
AK2	P1P2	0.181093	-0.11318	-0.0839907	10	P1P2	0.000319587	-0.196676	10	P1P2	0.00276915	-0.825442	10
AK3	P1P2	0.984978	0.0453742	0.000298263	10	P1P2	0.150986	0.0217931	10	P1P2	0.63643	0.099154	10
AK4	P1P2	0.369042	-0.0933413	-0.0404097	10	P1P2	0.481436	-0.0420578	10	P1P2	0.302565	-0.381281	10
AK5	P1P2	0.42881	0.0145174	0.00533855	10	P1P2	0.0616919	-0.0443374	10	P1P2	0.926436	-0.121397	10
AK7	P1P2	0.00440219	-0.303713	-0.715649	10	P1P2	0.527007	-0.0237604	10	P1P2	0.002244	-0.626826	10
AK8	P1P2	0.772622	-0.0997083	-0.0111706	10	P1P2	0.230341	-0.0449568	10	P1P2	0.433214	-0.257658	10
AK9	P1P2	0.247062	-0.0674546	-0.0409581	9	P1P2	0.951948	0.00810495	9	P1P2	0.295188	-0.091935	9
AKAP1	P1P2	0.469386	-0.134252	-0.0440976	10	P1P2	0.738603	0.00463809	10	P1P2	0.636851	-0.294917	10
AKAP10	P1P2	0.592412	-0.0164176	-0.00373298	10	P1P2	0.343995	0.0458001	10	P1P2	0.376307	0.0726958	10
AKAP11	P1P2	0.501343	0.0642657	0.019271	9	P1P2	0.21366	-0.0188207	10	P1P2	0.460661	0.104998	10
AKAP12	P1	0.542802	0.0363727	0.00965182	10	P1	0.366473	0.000234863	10	P1	0.631395	0.0635314	10
AKAP13	P1P2	0.702205	0.0830348	0.0127489	10	P1P2	0.464401	-0.0179899	10	P1P2	0.68086	0.127284	10
AKAP14	P1P2	0.549605	-0.0847497	-0.0220306	10	P1P2	0.822805	-0.0321107	10	P1P2	0.428476	-0.247132	10
AKAP17A	P1P2	0.130775	0.192116	0.169729	9	P1P2	0.61955	-0.0419753	9	P1P2	0.137569	0.264807	9
AKAP2	P1P2	0.881207	-0.082903	-0.00455322	10	P1P2	0.675375	-0.00911677	10	P1P2	0.992128	-0.169484	10
AKAP3	P1	0.602199	-0.191769	-0.0422391	9	P2	0.568987	0.0220184	10	P1	0.513085	-0.388015	9
AKAP4	P1P2	0.914287	0.0255272	0.000993449	10	P1P2	0.39603	0.0358531	10	P1P2	0.551504	0.0909312	10
AKAP5	P1P2	0.347406	0.0616512	0.0283079	10	P1P2	0.0246949	0.0464512	10	P1P2	0.104543	0.207778	10
AKAP6	P1P2	0.594167	0.0391212	0.00884496	9	P1P2	0.190252	-0.066595	10	P1P2	0.82782	-0.207223	10
AKAP7	P1P2	0.133952	0.144765	0.126387	10	P1P2	0.599977	-0.0230302	10	P1P2	0.192096	0.23603	10
AKAP8	P1P2	0.629931	-0.0612442	-0.0122922	10	P1P2	0.998945	-0.0128106	10	P1P2	0.658974	-0.147698	10
AKAP8L	P1P2	0.699458	0.041465	0.00643697	10	P1P2	0.0641881	-0.0697291	10	P1P2	0.664205	-0.0948491	10
AKAP9	P1P2	0.0403449	-0.337585	-0.470665	10	P1P2	0.92706	-0.00923071	10	P1P2	0.0419897	-0.670157	10
AKIP1	P1P2	0.942207	0.040684	0.00105183	10	P1P2	0.230684	-0.0358643	10	P1P2	0.669024	-0.145108	10
AKIRIN1	P1P2	0.00503924	-0.38039	-0.873997	10	P1P2	0.900835	0.0116719	10	P1P2	0.00583171	-0.725751	10
AKIRIN2	P1P2	0.886942	0.0841406	0.00438414	10	P1P2	0.222445	-0.00199627	10	P1P2	0.52583	0.294453	10
AKNA	P2	0.0443347	0.20286	0.274522	10	P1	0.176421	-0.0242734	10	P2	0.0664008	0.354033	10
AKNAD1	ENST00000370001.3	0.885771	-0.0923778	-0.00486634	10	ENST00000370001.3	0.766267	0.0151135	10	ENST00000370001.3	0.882348	-0.12271	10
AKR1A1	P1P2	0.848448	-0.113123	-0.00807415	10	P1P2	0.673121	0.0474701	10	P1P2	0.615736	-0.0262415	9
AKR1B1	P1P2	0.210299	0.239636	0.162273	10	P1P2	0.854037	0.0106758	10	P1P2	0.186781	0.476942	10
AKR1B10	P1P2	0.566042	-0.00448469	-0.0011084	10	P1P2	0.00148197	-0.134382	10	P1P2	0.0447844	-0.335622	10
AKR1B15	P1P2	0.71807	-0.141363	-0.0203328	9	P1P2	0.667874	-0.0047939	10	P1P2	0.73207	-0.41829	10
AKR1C1	P1P2	0.566133	-0.120914	-0.0298756	9	P1P2	0.795149	-0.00933032	9	P1P2	0.729591	-0.163409	8
AKR1C2	P2	0.194148	-0.183445	-0.130589	10	P1	0.725917	0.0030985	9	P2	0.208279	-0.323526	10
AKR1C3	P1P2	0.849494	-0.0339601	-0.00240573	10	P1P2	0.621606	-0.0114747	10	P1P2	0.845763	-0.0488237	10
AKR1C4	P1P2	0.57865	-0.0318393	-0.00756452	10	P1P2	0.781003	-0.00819104	10	P1P2	0.63601	-0.168004	10
AKR1D1	P1P2	0.536334	-0.0559204	-0.0151301	10	P1P2	0.585447	0.0268481	10	P1P2	0.337961	0.0438637	10
AKR1E2	P1P2	0.484727	-0.173041	-0.0544218	10	P1P2	0.732181	-0.0246792	10	P1P2	0.387368	-0.317299	10
AKR7A2	P1P2	0.280526	0.185232	0.102253	10	P1P2	0.630038	-0.00765809	10	P1P2	0.271391	0.228257	10
AKR7A3	P1P2	0.703634	-0.000975165	-0.000148862	10	P1P2	0.131164	0.0368713	10	P1P2	0.451583	0.123952	10
AKT1	P1P2	0.598165	0.0880633	0.0196539	10	P1P2	0.903163	-0.0142992	10	P1P2	0.494899	0.155223	10
AKT1S1	P1P2	0.152669	0.124607	0.101711	8	P1P2	0.0653563	-0.0609222	9	P1P2	0.465228	0.176664	9
AKT2	P1P2	0.328573	0.0352054	0.0170171	10	P1P2	0.128079	-0.0511358	10	P1P2	0.640534	0.074514	10
AKT3	P1P2	0.359325	0.103335	0.0459337	10	P1P2	0.569186	0.0317446	10	P1P2	0.224471	0.280466	10
AKTIP	P1P2	0.307806	-0.182821	-0.0935537	10	P1P2	0.645569	0.00200198	10	P1P2	0.33559	-0.111214	10
ALAD	P1P2	0.570666	-0.0634188	-0.0154499	10	P1P2	0.821548	0.0217064	10	P1P2	0.837755	0.0360903	9
ALAS1	P1P2	0.787754	-0.115963	-0.0120148	10	P1P2	0.712041	-0.0532484	10	P1P2	0.568755	-0.300486	10
ALAS2	P1P2	0.312612	0.0557602	0.0281585	10	P1P2	0.583125	-0.0261777	10	P1P2	0.556731	0.0589629	10
ALB	P1	0.223035	0.15024	0.0979002	10	P1	0.315851	-0.0286411	10	P1	0.556336	0.197482	10
ALCAM	P1P2	0.22001	0.119172	0.0783626	10	P1P2	0.841491	0.00169756	10	P1P2	0.221229	0.205893	10
ALDH16A1	P1P2	0.275508	0.0804445	0.0450381	9	P1P2	0.504744	-0.0188568	9	P1P2	0.273383	0.182065	8
ALDH18A1	P1P2	0.120114	0.167384	0.154061	7	P1P2	1.35195e-07	-0.296004	10	P1P2	0.0222789	-0.471139	10
ALDH1A1	P1P2	0.765258	0.0585473	0.00680273	10	P1P2	0.557875	-0.0211831	10	P1P2	0.937088	-0.0272425	10
ALDH1A2	P1P2	0.0586672	0.206236	0.254001	10	P1P2	0.649688	0.00557455	10	P1P2	0.0438821	0.43786	10
ALDH1A3	P2	0.127905	-0.182583	-0.163068	10	P1	0.115718	-0.069404	10	P2	0.079333	-0.424221	10
ALDH1B1	P1P2	0.619399	-0.135902	-0.0282716	9	P1P2	0.412692	-0.0247199	9	P1P2	0.418351	-0.279312	9
ALDH1L1	P1P2	0.66401	0.0338634	0.00602176	10	P1P2	0.901417	-0.0010128	10	P1P2	0.607303	0.0655039	10
ALDH1L2	P1P2	0.796208	0.0475987	0.00471101	10	P1P2	0.396767	0.00647846	10	P1P2	0.596433	0.137767	10
ALDH2	P1P2	0.726875	0.0386766	0.00535826	10	P1P2	0.0583717	-0.0578901	10	P1P2	0.711559	-0.0654451	10
ALDH3A1	P1P2	0.913817	0.0087419	0.000342164	10	P1P2	0.913295	0.0196844	10	P1P2	0.723886	0.0475708	10
ALDH3A2	P1P2	0.561236	-0.230071	-0.0577142	10	P1P2	0.234363	0.0251665	10	P1P2	0.710901	-0.237501	10
ALDH3B1	P1P2	0.636921	-0.0653085	-0.0127949	9	P1P2	0.572313	-0.0230549	9	P1P2	0.544468	-0.0735393	9
ALDH3B2	P1P2	0.526318	-0.0685791	-0.0191165	10	P1P2	0.144531	-0.0354018	10	P1P2	0.293676	-0.253993	10
ALDH4A1	P1P2	0.448172	-0.243197	-0.0847674	10	P1P2	0.265359	0.0316278	10	P1P2	0.576371	-0.317016	10
ALDH5A1	P1P2	0.805604	-0.0522066	-0.00490107	10	P1P2	0.408496	0.000893896	10	P1P2	0.919068	-0.119249	10
ALDH6A1	P1P2	0.782966	-0.082792	-0.00879722	10	P1P2	0.169518	-0.0555403	10	P1P2	0.350809	-0.17342	10
ALDH7A1	P1P2	0.850492	0.0430204	0.00302562	9	P1P2	0.106623	-0.0446468	10	P1P2	0.571956	-0.103326	10
ALDH8A1	P1P2	0.6456	-0.0324396	-0.00616471	10	P1P2	0.288261	0.036732	10	P1P2	0.942829	0.0136755	10
ALDH9A1	P1P2	0.379002	0.120635	0.0508307	10	P1P2	0.594064	0.036605	10	P1P2	0.232435	0.428244	10
ALDOA	P1P2	0.18583	-0.220146	-0.160901	10	P1P2	0.216269	-0.0294665	10	P1P2	0.197777	-0.385359	10
ALDOB	P2	0.280526	-0.218963	-0.120874	10	P1	0.0939954	-0.101974	10	P1	0.297279	-0.243721	10
ALDOC	P1P2	0.336338	-0.159192	-0.0753332	10	P1P2	0.858881	-0.016606	10	P1P2	0.325129	-0.234781	10
ALG1	P1P2	0.241994	-0.0921883	-0.0568061	10	P1P2	0.13064	-0.0620258	10	P1P2	0.131464	-0.790677	10
ALG10	P1P2	0.748121	-0.0638631	-0.00804853	10	P1P2	0.327982	-0.0039668	10	P1P2	0.90074	-0.113409	10
ALG10B	P1P2	0.625619	0.10281	0.0209414	10	P1P2	0.984759	0.00466858	10	P1P2	0.640323	0.189828	10
ALG11	P1P2	0.221183	0.133144	0.0872422	10	P1P2	0.0101225	-0.0754683	10	P1P2	0.884208	-0.0191184	10
ALG12	P1P2	0.367306	-0.0404702	-0.0176034	10	P1P2	0.701446	-0.0107549	10	P1P2	0.558314	-0.0113294	10
ALG13	P1P2	0.408849	-0.174982	-0.0679695	10	P1P2	0.102293	-0.0607758	10	P1P2	0.160465	-0.513379	10
ALG14	P1P2	0.123618	-0.226296	-0.205458	10	P1P2	0.505451	-0.0340999	10	P1P2	0.0950564	-0.522807	10
ALG1L	ENST00000340333.3	0.826675	0.012004	0.000992314	9	ENST00000340333.3	0.134097	0.0519101	9	ENST00000340333.3	0.271871	0.133667	8
ALG2	P1P2	0.741502	0.0590402	0.00766858	10	P1P2	0.450435	-0.00171613	10	P1P2	0.734731	0.046402	10
ALG3	P1P2	0.247769	-0.187474	-0.1136	10	P1P2	0.119369	-0.0188373	10	P1P2	0.119308	-0.547928	10
ALG5	P1P2	0.956137	-0.082501	-0.00160712	10	P1P2	0.0511344	-0.0622049	10	P1P2	0.329273	-0.342984	10
ALG6	P1P2	0.254813	0.0994697	0.0590629	10	P1P2	0.76896	-0.00924745	10	P1P2	0.249082	0.192447	10
ALG8	P1P2	0.97008	-0.0694251	-0.000915892	10	P1P2	0.405586	-0.0327623	10	P1P2	0.75434	-0.153151	10
ALG9	P1P2	0.269831	0.100653	0.0572622	10	P1P2	0.438272	-0.0348402	10	P1P2	0.46084	0.00954454	10
ALK	P1P2	0.665087	-0.0524419	-0.00928859	10	P1P2	0.340783	-0.0241506	10	P1P2	0.697128	-0.20064	10
ALKBH1	P1P2	0.367858	-0.0693447	-0.0301178	10	P1P2	0.317769	-0.0358762	10	P1P2	0.223966	-0.413782	10
ALKBH2	P1P2	0.983677	0.0111781	7.98945e-05	10	P1P2	0.266053	0.0232031	10	P1P2	0.680968	-0.0371879	10
ALKBH3	P1P2	0.287187	-0.163806	-0.0887559	10	P1P2	0.240548	0.0103264	10	P1P2	0.499378	-0.162392	10
ALKBH4	P1P2	0.184453	0.18949	0.139107	10	P1P2	0.151531	-0.0466539	10	P1P2	0.363807	0.324519	10
ALKBH5	P1P2	0.152022	-0.156486	-0.12802	10	P1P2	0.155126	0.037418	10	P1P2	0.473522	-0.291546	9
ALKBH6	P1P2	0.951767	-0.100234	-0.00215193	10	P1P2	0.894789	-0.00322487	10	P1P2	0.794599	0.0733881	9
ALKBH7	P1P2	0.761253	0.0346858	0.00410927	9	P1P2	0.272871	-0.0599926	10	P1P2	0.679134	-0.0656678	10
ALKBH8	P1P2	0.88109	-0.0199919	-0.00109915	10	P1P2	0.863037	0.00740556	10	P1P2	0.846686	0.0348246	10
ALLC	P1P2	0.0944941	-0.288117	-0.295203	10	P1P2	0.329073	0.0235994	10	P1P2	0.337433	-0.485784	9
ALMS1	P1P2	0.151895	-0.246682	-0.201899	10	P1P2	0.561336	-0.020532	10	P1P2	0.114902	-0.661726	10
ALOX12	P1P2	0.776255	-0.0688131	-0.00756912	10	P1P2	0.750611	-0.0330919	10	P1P2	0.817507	-0.199018	10
ALOX12B	P1P2	0.106359	-0.226434	-0.220372	10	P1P2	0.957695	-0.00679182	10	P1P2	0.111055	-0.557168	10
ALOX15	P1P2	0.132764	-0.173874	-0.152474	10	P1P2	0.673121	-0.00157402	10	P1P2	0.164765	-0.400073	10
ALOX15B	P1P2	0.621738	-0.215018	-0.0443781	10	P1P2	0.981126	0.00462572	10	P1P2	0.628461	-0.454589	9
ALOX5	P1P2	0.00112956	0.318655	0.939105	10	P1P2	0.790833	-0.00962128	10	P1P2	0.000852294	0.661049	10
ALOX5AP	P1P2	0.814223	-0.0377267	-0.00336737	10	P1P2	0.814355	-0.0184774	10	P1P2	0.820598	-0.2358	10
ALOXE3	P1P2	0.214923	-0.119934	-0.0800819	10	P1P2	0.18606	0.0343987	10	P1P2	0.375037	-0.371529	10
ALPI	P1P2	0.55904	0.141319	0.0356911	10	P1P2	0.108842	-0.0362513	10	P1P2	0.851417	0.0982828	10
ALPK1	P1P2	0.636199	0.0558782	0.0109749	8	P1P2	0.0499502	-0.0766809	9	P1P2	0.832906	-0.106076	9
ALPK2	ENST00000361673.3	0.0397129	-0.207734	-0.29105	10	ENST00000361673.3	0.274933	-0.0512054	10	ENST00000361673.3	0.0211739	-0.716198	10
ALPK3	P1P2	0.648263	0.0478288	0.0090037	10	P1P2	0.308185	0.0230842	10	P1P2	0.369906	0.0474117	10
ALPL	P2	0.250203	0.0949194	0.0571136	10	P2	0.789249	0.0113327	10	P2	0.242967	0.154025	10
ALPP	P1P2	0.41595	0.0410501	0.0156384	10	P1P2	0.607046	-0.0254951	10	P1P2	0.617222	0.0477167	10
ALPPL2	P1P2	0.863341	-0.031174	-0.00198945	10	P1P2	0.126794	0.0583424	10	P1P2	0.79289	0.0420155	10
ALS2	P1P2	0.121286	0.219958	0.201524	10	P1P2	0.524323	-0.0370412	10	P1P2	0.125616	0.162991	10
ALS2CL	P1P2	0.0806337	0.271858	0.297272	10	P1P2	0.215234	-0.0347357	10	P1P2	0.170386	0.538469	10
ALS2CR11	P1P2	0.288866	0.113558	0.061242	9	P1P2	0.230345	-0.0720201	9	P1P2	0.751545	0.0337348	10
ALS2CR12	P1P2	0.00128757	-0.478549	-1.38311	10	P1P2	0.16838	0.0197376	10	P1P2	0.002233	-0.865269	10
ALX1	P1P2	0.370783	0.0632837	0.0272677	10	P1P2	0.91213	-0.0129885	10	P1P2	0.360394	0.235911	10
ALX3	P1P2	0.356843	0.0378024	0.0169174	10	P1P2	0.318339	0.00100756	10	P1P2	0.273063	0.166698	10
ALX4	P1P2	0.7569	0.00961872	0.00116349	10	P1P2	0.682694	-0.0141263	10	P1P2	0.808824	-0.0885499	10
ALYREF	P1P2	0.0772471	0.223692	0.248772	10	P1P2	0.0250261	-0.0685113	10	P1P2	0.350429	0.194163	10
AMACR	P1P2	0.388309	-0.0644384	-0.0264727	10	P1P2	0.969876	-0.0098984	10	P1P2	0.462902	-0.165619	10
AMBN	P1P2	0.874584	-0.0342703	-0.00199449	8	P1P2	0.549354	-0.0256068	9	P1P2	0.761981	-0.115828	9
AMBP	P1P2	0.122861	0.216536	0.197175	10	P1P2	0.0182883	-0.0812592	10	P1P2	0.424366	0.203166	10
AMBRA1	P1P2	0.0139407	0.257497	0.477841	10	P1P2	0.00538235	0.0203845	10	P1P2	0.00184908	0.508415	10
AMD1	P1P2	0.485855	0.0700227	0.0219516	9	P1P2	0.662749	-0.0150236	10	P1P2	0.483246	0.18172	10
AMDHD1	P1P2	0.867772	-0.0473022	-0.00291355	10	P1P2	0.900021	-0.0275189	10	P1P2	0.788693	-0.206337	10
AMDHD2	P1P2	0.206599	-0.138322	-0.0947327	10	P1P2	0.215669	0.0100027	10	P1P2	0.385108	-0.126827	10
AMELX	P1P2	0.31977	0.0465807	0.023065	10	P1P2	0.397176	-0.0302295	10	P1P2	0.502	0.0816897	10
AMELY	P1P2	0.83963	-0.0195806	-0.0014864	10	P1P2	0.306167	0.0348017	10	P1P2	0.82266	-0.0306961	10
AMER1	P1P2	0.703634	0.0565992	0.00864003	10	P1P2	0.429382	-0.0272342	10	P1P2	0.879676	0.0962887	10
AMER2	P1P2	0.868472	-0.046838	-0.00286855	10	P1P2	0.779537	-0.00281762	10	P1P2	0.873407	-0.025812	10
AMER3	P1P2	0.454917	-0.168554	-0.0576569	9	P1P2	0.630665	0.0241181	10	P1P2	0.611221	-0.324285	10
AMFR	P1P2	0.823876	0.0876613	0.00737568	9	P1P2	0.674061	-0.0301208	9	P1P2	0.950238	0.181701	9
AMH	P1P2	0.391294	0.0283311	0.0115449	9	P1P2	0.357881	-0.0368165	10	P1P2	0.581912	-0.210258	10
AMHR2	P1P2	0.377397	0.0553898	0.023441	10	P1P2	0.4263	-0.0106586	10	P1P2	0.498724	0.0828375	10
AMICA1	P1P2	0.370902	-0.0812778	-0.0350096	9	P1P2	0.542761	-0.0143694	9	P1P2	0.325683	-0.263876	9
AMIGO1	P1P2	0.249654	-0.0433444	-0.026122	10	P1P2	0.554621	-0.0315288	10	P1P2	0.271199	-0.213224	10
AMIGO2	P1P2	0.626249	0.112727	0.022912	9	P1P2	0.188715	-0.0541947	10	P1P2	0.781335	-0.046312	10
AMIGO3	P2	0.601154	-0.0405219	-0.00895594	10	P1	0.00217209	-0.168892	10	P1	0.0716867	-0.404572	10
AMMECR1	P1P2	0.760398	-0.109978	-0.0130828	10	P1P2	0.334269	0.0235726	10	P1P2	0.98038	0.0987542	10
AMMECR1L	P1P2	0.335505	0.172947	0.0820291	9	P1P2	0.247326	-0.0546257	10	P1P2	0.602883	0.189161	10
AMN	P2	0.398582	0.0368286	0.0147124	10	P2	0.505451	-0.0148533	10	P2	0.512563	0.0744794	10
AMN1	P1P2	0.877582	-0.14225	-0.00806733	10	P1P2	0.369914	0.0373676	10	P1P2	0.833791	-0.22266	10
AMOT	P1P2	0.4597	-0.0133118	-0.00449306	10	P1P2	0.956642	-0.0197069	10	P1P2	0.507739	0.140822	10
AMOTL1	P1P2	0.467658	-0.0609417	-0.0201151	10	P1P2	0.916909	-0.00364545	10	P1P2	0.566959	-0.25209	10
AMOTL2	P1P2	0.0898536	0.161445	0.168946	10	P1P2	0.654773	-0.00564946	10	P1P2	0.103415	0.294165	10
AMPD1	P1P2	0.974099	-0.0846946	-0.000965249	10	P1P2	0.89444	0.0105678	10	P1P2	0.942595	-0.324903	10
AMPD2	P1	0.116621	-0.321796	-0.300308	10	P2	0.52241	0.0455935	10	P1	0.0861642	-0.442908	10
AMPD3	P1P2	0.155831	-0.287177	-0.231851	10	P1P2	0.447618	-0.0087898	10	P1P2	0.0957879	-0.683333	10
AMPH	P1P2	0.834419	0.0983334	0.00773057	10	P1P2	0.573582	-0.014165	10	P1P2	0.738173	0.19276	10
AMT	P1P2	0.872908	0.0314539	0.00185677	10	P1P2	0.582924	0.00556551	10	P1P2	0.73984	0.0844559	10
AMTN	P1P2	0.388146	-0.0901127	-0.0370368	10	P1P2	0.862922	0.00544162	10	P1P2	0.461109	-0.175932	10
AMY1B	ENST00000330330.5,ENST00000370080.3	0.527771	-0.159315	-0.0442186	10	ENST00000330330.5,ENST00000370080.3	0.201787	0.0407827	10	ENST00000330330.5,ENST00000370080.3	0.77332	-0.233602	10
AMY2A	P1P2	0.5919	-0.0158913	-0.00361928	10	P1P2	0.0336673	-0.0648497	10	P1P2	0.891653	-0.0724679	10
AMY2B	P1P2	0.30865	-0.0669533	-0.0341819	10	P1P2	0.148824	0.0704491	10	P1P2	0.694263	0.00206992	9
AMZ1	P1P2	0.764709	0.0715275	0.00833324	9	P1P2	0.078273	-0.110428	10	P1P2	0.509344	-0.182695	10
AMZ2	P1P2	0.0347355	-0.341655	-0.498552	10	P1P2	0.446389	0.0166023	10	P1P2	0.0659228	-0.461418	10
ANAPC1	P1P2	0.0910388	-0.219909	-0.228876	10	P1P2	0.0475021	-0.0400338	10	P1P2	0.0243779	-0.716183	10
ANAPC10	P1P2	0.347161	-0.0883048	-0.0405733	9	P1P2	0.321628	-0.148976	10	P1P2	0.0287271	-0.677758	10
ANAPC11	P1P2	0.432191	-0.146115	-0.0532332	10	P1P2	0.323353	-0.0396718	10	P1P2	0.285296	-0.476046	10
ANAPC13	P1P2	0.457274	0.0308923	0.0104979	10	P1P2	0.0558199	-0.0585148	10	P1P2	0.960655	-0.000336945	10
ANAPC15	P1P2	0.283848	-0.176599	-0.0965842	8	P1P2	0.629308	-0.0304603	9	P1P2	0.225339	-0.344759	9
ANAPC16	P1P2	0.219622	0.122584	0.0807002	9	P1P2	0.152624	-0.0829107	10	P1P2	0.540829	0.0374854	10
ANAPC2	P1P2	0.597238	-0.066135	-0.0148045	10	P1P2	0.0463621	-0.104957	10	P1P2	0.137247	-0.37039	10
ANAPC4	P1P2	0.483709	-0.00176231	-0.000555861	10	P1P2	0.00597016	-0.172296	10	P1P2	0.632443	-0.403355	10
ANAPC5	P1P2	0.144692	-0.173111	-0.145336	9	P1P2	0.00916847	-0.156501	10	P1P2	0.00656633	-0.665598	10
ANAPC7	P1P2	0.201111	0.132825	0.0925208	10	P1P2	0.222278	-0.0565367	10	P1P2	0.657376	0.141838	10
ANG	P1P2	0.369279	0.26606	0.115109	10	P1P2	0.0686005	-0.110392	10	P1P2	0.655141	0.0708283	10
ANGEL1	P1P2	0.138158	0.164124	0.141085	10	P1P2	0.527007	-0.00425266	10	P1P2	0.122555	0.229641	10
ANGEL2	P1P2	0.280842	0.177287	0.0977803	9	P1P2	0.937399	-0.0281477	9	P1P2	0.418887	0.183454	9
ANGPT1	P1P2	0.0702453	-0.288403	-0.332638	10	P1P2	0.837011	0.0148192	10	P1P2	0.056848	-0.54622	10
ANGPT2	P1P2	0.864235	0.0243803	0.00154493	9	P1P2	0.18655	-0.0380322	10	P1P2	0.690061	-0.0710746	10
ANGPT4	P1P2	0.64592	-0.0272758	-0.00517753	10	P1P2	0.107969	-0.0615862	10	P1P2	0.258579	-0.19534	10
ANGPTL1	P1P2	0.336488	0.111914	0.052939	10	P1P2	0.119683	0.026201	10	P1P2	0.162759	0.325643	10
ANGPTL2	P1P2	0.0573831	0.249582	0.309785	9	P1P2	0.0382638	-0.10028	10	P1P2	0.241307	0.300227	10
ANGPTL3	P1P2	0.688838	-0.121216	-0.0196229	10	P1P2	0.360808	-0.0625278	10	P1P2	0.409158	-0.20033	10
ANGPTL4	P1P2	0.706938	0.0998887	0.0150451	10	P1P2	0.96519	-0.0129012	10	P1P2	0.730519	0.262103	10
ANGPTL5	P1P2	0.604596	-0.127613	-0.0278879	9	P1P2	0.0322104	0.0461403	9	P1P2	0.701315	0.0450905	8
ANGPTL6	P1P2	0.62017	-0.106461	-0.0220894	9	P1P2	0.152191	-0.0100922	9	P1P2	0.871003	-0.204814	9
ANGPTL7	P1P2	0.279998	0.0605649	0.033483	10	P1P2	0.411933	0.0183967	8	P1P2	0.194212	0.120567	10
ANHX	P1P2	0.394844	-0.187425	-0.07564	9	P1P2	0.013043	0.0895159	9	P1P2	0.854529	0.0315464	9
ANK1	P1P2	0.292592	-0.145626	-0.077726	10	P1P2	0.457699	-0.0447868	10	P1P2	0.258951	-0.416876	10
ANK2	ENST00000264366.6	0.414083	-0.114913	-0.0440017	10	ENST00000264366.6	0.364216	-0.0245476	10	ENST00000264366.6	0.236725	-0.208877	10
ANK3	P1P2	0.144249	-0.200613	-0.168693	10	P1P2	0.301262	-0.0210719	10	P1P2	0.109186	-0.457173	10
ANKAR	P1P2	0.323752	0.0265576	0.0130076	10	P1P2	0.888865	-0.0160091	10	P1P2	0.389637	0.0675059	10
ANKDD1A	P1P2	0.774211	-0.0898827	-0.00998961	10	P1P2	0.153046	0.0291737	10	P1P2	0.850147	0.0694129	10
ANKDD1B	P1P2	0.0271348	-0.310975	-0.487134	10	P1P2	0.102293	0.0311542	10	P1P2	0.0774112	-0.563902	10
ANKEF1	P1P2	0.821364	-0.0937847	-0.00801522	10	P1P2	0.393419	0.0462598	10	P1P2	0.934161	-0.067464	10
ANKFN1	P1P2	0.850492	-0.124296	-0.00874172	9	P1P2	0.310423	-0.0482274	10	P1P2	0.482052	-0.396434	10
ANKFY1	P1P2	0.69706	-0.0685258	-0.01074	8	P1P2	0.629418	-0.0503617	9	P1P2	0.466272	-0.14305	9
ANKH	P1P2	0.471977	0.125417	0.0408959	9	P1P2	0.0475573	-0.0733219	9	P1P2	0.841638	-0.0386718	9
ANKHD1	P1P2	0.165378	0.130732	0.10217	10	P1P2	0.0125988	-0.0758729	10	P1P2	0.597557	0.0157119	10
ANKHD1-EIF4EBP3	P1P2	0.165378	0.130732	0.10217	10	P1P2	0.0125988	-0.0758729	10	P1P2	0.597557	0.0157119	10
ANKIB1	P1P2	0.469113	-0.101478	-0.0333581	10	P1P2	0.645464	-0.0758979	10	P1P2	0.265721	-0.246359	10
ANKK1	P1P2	0.624989	0.0316486	0.00646037	10	P1P2	0.616322	-0.024854	10	P1P2	0.712218	-0.0356998	10
ANKLE1	P1P2	0.191968	-0.228213	-0.163576	10	P1P2	0.134269	-0.0541397	10	P1P2	0.0812676	-0.493435	10
ANKLE2	P1P2	0.772282	0.0366675	0.00411498	10	P1P2	0.627222	0.0207988	10	P1P2	0.659827	0.169445	10
ANKMY1	P1P2	0.718545	0.0426229	0.00611836	10	P1P2	0.539559	-0.0206212	10	P1P2	0.662709	0.0597396	10
ANKMY2	P1P2	0.0242899	0.30464	0.491864	9	P1P2	0.0125155	-0.0968261	10	P1P2	0.213869	0.239799	10
ANKRA2	P1P2	0.360414	-0.13085	-0.0579927	10	P1P2	0.265485	-0.0185986	10	P1P2	0.284632	-0.535312	10
ANKRD1	P1P2	0.180032	-0.338246	-0.251876	10	P1P2	0.725336	0.0101643	10	P1P2	0.2003	-0.628697	10
ANKRD10	P1P2	0.0763327	0.133943	0.149653	10	P1P2	0.542477	-0.0139655	10	P1P2	0.123449	0.279935	10
ANKRD11	P1P2	0.142546	0.134495	0.113789	10	P1P2	0.285071	-0.0345931	10	P1P2	0.304087	0.221378	10
ANKRD12	P1P2	0.862176	-0.113941	-0.0073383	10	P1P2	0.0710238	0.0725401	9	P1P2	0.856846	0.149097	10
ANKRD13A	P1P2	0.515372	-0.0564301	-0.0162451	9	P1P2	0.203192	-0.00949821	10	P1P2	0.551799	-0.103208	10
ANKRD13B	P1P2	0.898663	0.0131258	0.000609073	10	P1P2	0.578294	-0.0182691	10	P1P2	0.713645	-0.118773	10
ANKRD13C	P1P2	0.673401	-0.0629074	-0.0108029	10	P1P2	0.893046	-0.00767728	10	P1P2	0.623458	-0.000149213	10
ANKRD13D	P1P2	0.397341	0.118847	0.0476381	10	P1P2	0.0416602	-0.0874096	10	P1P2	0.801643	0.085195	10
ANKRD16	P1P2	0.0703603	0.18298	0.210916	10	P1P2	0.267192	-0.0290791	10	P1P2	0.138616	0.324853	10
ANKRD17	P1P2	0.286033	0.0715999	0.0389205	9	P1P2	0.179592	-0.0619536	10	P1P2	0.79914	0.00198356	10
ANKRD18A	ENST00000564591.1,ENST00000566717.2	0.864041	0.129665	0.00822931	10	ENST00000564591.1,ENST00000566717.2	0.652652	-0.0334798	10	ENST00000564591.1,ENST00000566717.2	0.848531	0.166961	10
ANKRD18B	P1P2	0.0149074	0.245994	0.449333	10	P1P2	0.461088	0.0324911	10	P1P2	0.00301771	0.556018	9
ANKRD2	P1P2	0.835345	-0.0526204	-0.00411145	10	P1P2	0.162379	0.0243156	10	P1P2	0.850724	-0.132153	10
ANKRD22	P1P2	0.892565	-0.0403573	-0.00199204	10	P1P2	0.08722	0.0595043	10	P1P2	0.444359	0.169326	10
ANKRD23	P2	0.202054	-0.209693	-0.145639	10	P2	0.535004	0.016903	10	P1	0.211916	-0.362086	9
ANKRD24	P1P2	0.968458	0.00106469	1.48197e-05	9	P1P2	0.528255	-0.0286702	10	P1P2	0.714414	0.138683	10
ANKRD26	P1P2	0.1809	0.227633	0.169032	10	P1P2	0.215016	-0.0589393	10	P1P2	0.345588	0.178521	10
ANKRD27	P1P2	0.177636	0.0650936	0.0488508	10	P1P2	0.19746	-0.0478363	10	P1P2	0.401677	0.0988751	10
ANKRD28	P1P2	0.398676	0.122073	0.0487537	9	P1P2	0.933087	0.00649938	9	P1P2	0.337902	0.113155	9
ANKRD29	P1P2	0.534479	-0.0986522	-0.0268402	10	P1P2	0.522028	-0.0239345	10	P1P2	0.459141	-0.220606	10
ANKRD30A	P1P2	0.867306	0.0113285	0.000700415	10	P1P2	0.946695	-0.0166879	10	P1P2	0.9832	-0.0424923	10
ANKRD30B	P1P2	0.990273	-0.077275	-0.000328028	9	P1P2	0.122112	-0.0389577	10	P1P2	0.531321	-0.273576	10
ANKRD31	P1P2	0.218952	0.184512	0.121714	10	P1P2	0.30395	0.0337882	10	P1P2	0.0798384	0.609161	10
ANKRD32	P1P2	0.273062	0.12862	0.0725082	10	P1P2	0.984877	-0.0273297	10	P1P2	0.370535	0.203705	10
ANKRD33	P1P2	0.399079	0.226048	0.0901797	10	P1P2	0.34392	-0.0391711	10	P1P2	0.58272	0.209157	10
ANKRD33B	P1P2	0.936192	-0.0185309	-0.000530634	10	P1P2	0.675805	-0.0180466	10	P1P2	0.801871	-0.106592	10
ANKRD34A	P2	0.541132	0.0560243	0.0149415	10	P1	0.310213	0.024579	10	P2	0.417989	0.224965	10
ANKRD34B	P1	0.138711	0.191009	0.163864	10	P2	0.359728	0.0119846	10	P1	0.0784797	0.28517	10
ANKRD34C	P1P2	0.681492	-0.141029	-0.0234869	9	P1P2	0.644678	-0.0408928	9	P1P2	0.566327	-0.27278	9
ANKRD35	P1P2	0.0420223	0.366009	0.503818	10	P1P2	0.180499	0.02342	10	P1P2	0.012586	0.749458	10
ANKRD36	P1P2	0.50043	-0.0342094	-0.0102853	10	P1P2	0.367722	0.035511	10	P1P2	0.843919	-0.135471	10
ANKRD36C	P1P2	0.920994	-0.0883023	-0.00315621	10	P1P2	0.510631	0.0124012	10	P1P2	0.831034	-0.0844731	10
ANKRD37	P1P2	0.799528	-0.0152844	-0.00148513	10	P1P2	0.147013	0.0176467	10	P1P2	0.612564	-0.146109	10
ANKRD39	P1P2	0.170637	-0.27371	-0.210189	10	P1P2	0.464221	0.0173792	10	P1P2	0.243562	-0.493693	10
ANKRD40	P1P2	0.212601	0.0944954	0.0635421	9	P1P2	0.587773	-0.0465849	10	P1P2	0.441907	0.131005	10
ANKRD42	P1P2	0.916405	-0.0871194	-0.00330293	10	P1P2	0.176562	0.00205011	10	P1P2	0.84127	-0.2137	10
ANKRD44	ENST00000450567.1	0.258731	-0.167355	-0.0982629	10	ENST00000328737.2	0.24541	0.0214775	10	ENST00000450567.1	0.344384	-0.327708	10
ANKRD45	P1P2	0.512573	0.0837004	0.0242936	10	P1P2	0.651064	-0.0135561	10	P1P2	0.333525	0.105142	10
ANKRD46	P1P2	0.0145091	-0.419379	-0.77097	10	P1P2	0.612604	-0.0224736	10	P1P2	0.00918402	-0.868902	10
ANKRD49	P1P2	0.722983	0.0313936	0.00442247	10	P1P2	0.987925	0.0124334	10	P1P2	0.616497	0.0295356	10
ANKRD50	P1P2	0.341341	-0.152658	-0.0712626	9	P1P2	0.25397	0.0159001	9	P1P2	0.673687	-0.14939	8
ANKRD52	P1P2	0.0704103	-0.29434	-0.339186	9	P1P2	0.0712907	-0.0721362	9	P1P2	0.0183126	-0.677667	9
ANKRD53	P1P2	0.165694	0.174513	0.136241	10	P1P2	0.964956	0.0058699	10	P1P2	0.131238	0.35776	10
ANKRD54	P1P2	0.759044	-0.0462602	-0.00553888	10	P1P2	0.00142734	-0.113716	10	P1P2	0.35608	-0.323935	10
ANKRD55	ENST00000341048.4	0.619399	0.0964005	0.0200542	9	ENST00000341048.4	0.465807	0.0385919	9	ENST00000341048.4	0.339077	0.0609868	9
ANKRD6	P1P2	0.789922	0.0415903	0.0042595	10	P1P2	0.639359	-0.00827438	10	P1P2	0.746856	0.0669081	10
ANKRD60	ENST00000457363.1	0.189105	0.126836	0.0917399	10	ENST00000457363.1	0.800129	-0.0155261	10	ENST00000457363.1	0.221842	0.292652	10
ANKRD61	P1P2	0.0164914	-0.285249	-0.508526	10	P1P2	0.524706	0.00435667	10	P1P2	0.0216286	-0.601874	9
ANKRD62	P1P2	0.950351	-0.0970371	-0.00214609	10	P1P2	0.418397	0.0160024	10	P1P2	0.697999	-0.188112	10
ANKRD63	P1P2	0.2814	0.116997	0.0644275	9	P1P2	0.813007	-0.00424929	9	P1P2	0.215288	0.250391	9
ANKRD65	P1	0.300411	-0.213963	-0.111749	10	P2	0.363752	-0.037393	9	P1	0.241189	-0.525863	10
ANKRD66	P1P2	0.955254	-0.109491	-0.00217679	9	P1P2	0.522618	0.00480767	9	P1P2	0.703025	-0.0481238	8
ANKRD7	P2	0.276188	0.102571	0.057316	10	P2	0.219617	0.0309595	10	P2	0.121347	0.350662	10
ANKRD9	P1P2	0.104382	-0.223862	-0.219693	10	P1P2	0.19746	0.0413907	10	P1P2	0.371296	-0.303277	9
ANKS1A	P1P2	0.465184	0.12193	0.0405267	8	P1P2	0.230405	-0.0380503	9	P1P2	0.861843	0.0309553	9
ANKS1B	ENST00000329257.7,ENST00000547776.2	0.0985062	-0.238185	-0.239741	10	ENST00000329257.7,ENST00000547776.2	0.451936	0.00361725	10	ENST00000329257.7,ENST00000547776.2	0.148324	-0.284954	10
ANKS3	P1P2	0.0551164	-0.214659	-0.270196	10	P1P2	0.987573	-0.0122147	10	P1P2	0.0565421	-0.558082	10
ANKS4B	P1P2	0.0401463	0.258349	0.360747	8	P1P2	0.492261	-0.000436846	9	P1P2	0.0393759	0.493983	9
ANKS6	P1P2	0.26168	0.0256807	0.014952	10	P1P2	0.485104	-0.000143379	10	P1P2	0.244934	0.0950642	10
ANKUB1	ENST00000446160.1	0.565641	0.0160126	0.00396246	10	ENST00000446160.1	0.246068	0.0367748	10	ENST00000446160.1	0.285429	0.248066	10
ANKZF1	P1P2	0.0549661	0.178611	0.225033	10	P1P2	0.222835	-0.0562857	10	P1P2	0.205366	0.334253	10
ANLN	P1P2	0.538155	-0.116542	-0.0313606	8	P1P2	2.84123e-05	-0.178935	9	P1P2	0.016413	-0.955542	9
ANO1	P1P2	0.102839	0.250044	0.247004	9	P1P2	0.843186	-0.0194785	9	P1P2	0.0970981	0.310413	9
ANO10	P1P2	0.743408	-0.0663269	-0.00854111	10	P1P2	0.313094	-0.0586269	10	P1P2	0.379972	-0.32087	10
ANO2	P1P2	0.515728	-0.066412	-0.0190987	10	P1P2	0.735058	0.00463287	10	P1P2	0.58971	-0.138692	10
ANO3	P1P2	0.588014	-0.108655	-0.0250572	9	P1P2	0.720809	-0.034992	9	P1P2	0.432414	-0.212645	9
ANO4	P1P2	0.894349	-0.0145979	-0.000707897	8	P1P2	0.538395	-0.0526009	10	P1P2	0.595106	-0.148245	10
ANO5	P1P2	0.853794	-0.0721142	-0.00495041	10	P1P2	0.468447	-0.0224959	10	P1P2	0.667524	-0.172772	10
ANO6	P1P2	0.775132	-0.0616283	-0.0068176	8	P1P2	0.778467	-0.0367781	9	P1P2	0.387285	-0.19018	9
ANO7	P1P2	0.7231	0.0152843	0.00215206	9	P1P2	0.193102	-0.0390056	10	P1P2	0.824379	-0.111334	10
ANO8	P1P2	0.250631	0.176977	0.106357	10	P1P2	0.164465	-0.0955324	10	P1P2	0.563275	0.130313	10
ANO9	P1P2	0.493948	-0.126724	-0.0388179	10	P1P2	0.725226	-0.0219452	10	P1P2	0.350429	-0.141212	10
ANP32A	P1P2	0.519086	0.104716	0.029819	10	P1P2	0.474418	0.00532069	10	P1P2	0.490072	0.14264	10
ANP32B	P1P2	0.302144	-0.154339	-0.0802233	10	P1P2	0.445512	-0.0486224	10	P1P2	0.205102	-0.573313	10
ANP32D	P1P2	0.765032	0.0477836	0.00555821	10	P1P2	0.0974489	0.0411748	10	P1P2	0.401347	0.17312	10
ANP32E	P1P2	0.00780795	-0.346934	-0.731151	10	P1P2	0.817207	0.0154396	10	P1P2	0.0141145	-0.740605	10
ANPEP	P2	0.195322	0.157102	0.111424	10	P1	0.210111	-0.0238571	10	P2	0.200715	0.336767	10
ANTXR1	P1P2	0.318762	-0.114898	-0.057051	10	P1P2	0.382675	0.005308	10	P1P2	0.378535	-0.348225	10
ANTXR2	P1P2	0.836503	-0.0424105	-0.0032882	10	P1P2	0.624723	-0.0121521	10	P1P2	0.943298	-0.0621735	10
ANXA1	P1P2	0.142062	0.110972	0.0940515	10	P1P2	0.795818	-0.00765246	10	P1P2	0.137403	0.210768	10
ANXA10	P1P2	0.429242	-0.188478	-0.0692274	10	P1P2	0.104283	0.0328322	10	P1P2	0.780431	-0.183859	10
ANXA11	P1P2	0.908645	0.00908668	0.00037806	10	P1P2	0.988745	-0.00033729	10	P1P2	0.975095	-0.00801003	10
ANXA13	P1P2	0.143112	0.199426	0.16838	10	P1P2	0.284939	-0.0276656	10	P1P2	0.204261	0.361265	10
ANXA2	P1P2	0.152829	0.124603	0.10165	10	P1P2	0.895835	0.00145108	10	P1P2	0.172832	0.300356	10
ANXA2R	P1P2	0.35605	-0.172489	-0.0773594	9	P1P2	0.973925	-0.0166636	9	P1P2	0.338529	-0.327053	9
ANXA3	P1P2	0.935838	-0.0816624	-0.00235181	10	P1P2	0.716097	0.00170392	10	P1P2	0.816935	-0.0327694	10
ANXA4	P1P2	0.466932	0.0759451	0.0251186	10	P1P2	0.189755	-0.0457173	10	P1P2	0.787333	0.0554971	10
ANXA5	P1P2	0.40282	0.0792951	0.0313128	10	P1P2	0.103036	0.0397372	10	P1P2	0.179563	0.214892	10
ANXA6	P1P2	0.172448	0.128887	0.0983846	10	P1P2	0.973157	-0.00770921	10	P1P2	0.181143	0.26541	10
ANXA7	P1P2	0.815604	-0.00380822	-0.000337107	10	P1P2	0.0226287	-0.0888158	10	P1P2	0.399367	-0.147136	10
ANXA8	P1P2	0.10697	0.170187	0.165207	10	P1P2	0.143442	0.0368364	10	P1P2	0.0347782	0.356813	10
ANXA8L1	ENST00000359178.4	0.400822	0.0260708	0.0103514	10	ENST00000359178.4	0.048498	0.0542148	10	ENST00000359178.4	0.160553	0.100477	10
ANXA9	P1P2	0.372688	-0.238299	-0.102148	10	P1P2	0.411753	0.02333	10	P1P2	0.390449	-0.153521	10
AOAH	P1P2	0.291438	-0.188592	-0.100982	10	P1P2	0.0769388	0.0570172	10	P1P2	0.645811	-0.308039	10
AOC1	P2	0.00731816	-0.241606	-0.515972	9	P2	0.0987023	-0.0542481	10	P2	0.00284625	-0.558379	10
AOC2	P1P2	0.481397	0.108735	0.0345229	10	P1P2	0.113858	-0.0320923	10	P1P2	0.699089	0.122656	10
AOC3	P1P2	0.531168	0.0771744	0.021205	10	P1P2	0.810821	0.00834643	10	P1P2	0.424451	0.151302	10
AOX1	P1	0.211326	-0.211041	-0.142462	10	P1	0.319266	0.00270759	10	P1	0.373691	-0.265727	10
AP1AR	P1P2	0.282912	0.223026	0.122296	10	P1P2	0.773006	-0.0059025	10	P1P2	0.290304	0.441159	10
AP1B1	P1P2	0.902654	-0.00946566	-0.00042102	10	P1P2	0.080921	-0.0408009	10	P1P2	0.688868	-0.0872254	10
AP1G1	P1P2	0.195782	-0.038795	-0.0274757	10	P1P2	0.443761	-0.00465543	10	P1P2	0.239596	0.105509	10
AP1G2	P1P2	0.188058	-0.30141	-0.218735	10	P1P2	0.440271	-0.0203721	10	P1P2	0.158369	-0.621349	10
AP1M1	P1P2	0.783399	-0.0561245	-0.00595015	8	P1P2	0.000175022	-0.0847528	10	P1P2	0.230655	-0.563186	10
AP1M2	P1P2	0.999252	-0.0547875	-1.78099e-05	9	P1P2	0.0485315	-0.0985552	10	P1P2	0.3547	-0.440321	10
AP1S1	P1P2	0.427028	-0.112006	-0.0413912	9	P1P2	0.281509	0.0433963	9	P1P2	0.574552	-0.113598	9
AP1S2	P1P2	0.281055	0.0639678	0.0352596	10	P1P2	0.380118	-0.0202403	10	P1P2	0.374245	0.120297	10
AP1S3	P1P2	0.557147	-0.103673	-0.0263361	10	P1P2	0.191948	-0.020094	10	P1P2	0.481318	-0.221073	10
AP2A1	P1P2	0.0115144	-0.275351	-0.53384	10	P1P2	0.0105692	-0.10674	10	P1P2	0.0012154	-0.93088	10
AP2A2	P1P2	0.150207	-0.231762	-0.190812	10	P1P2	0.407663	-0.0695284	10	P1P2	0.0528689	-0.695042	10
AP2B1	P1P2	0.991365	0.0120483	4.53786e-05	10	P1P2	0.0977461	-0.0502734	10	P1P2	0.484125	-0.178365	9
AP2M1	P1	0.648911	-0.0396075	-0.00743886	5	P1	6.234e-06	-0.253519	10	P1	0.000733856	-0.760025	10
AP2S1	P1P2	0.919179	-0.016537	-0.000605253	8	P1P2	0.171259	-0.163852	10	P1P2	0.190445	-0.53571	10
AP3B1	P1P2	0.113578	0.0240991	0.0227665	10	P1P2	0.918192	-0.0289051	10	P1P2	0.201233	0.0703374	10
AP3B2	P1P2	0.930298	0.0150879	0.000473424	10	P1P2	0.394805	-0.0536087	10	P1P2	0.582922	-0.159901	10
AP3D1	P1P2	0.563808	-0.187454	-0.0466515	9	P1P2	0.301193	-0.069341	10	P1P2	0.334781	-0.461841	9
AP3M1	P1P2	0.162817	-0.164124	-0.129379	10	P1P2	0.603251	-0.00335961	10	P1P2	0.125543	-0.434217	10
AP3M2	P1P2	0.483709	0.0516265	0.0162838	10	P1P2	0.76436	0.00300849	10	P1P2	0.519318	0.10823	10
AP3S1	P1P2	0.0745545	-0.148725	-0.167691	10	P1P2	0.0986423	0.0269094	10	P1P2	0.231688	-0.285918	10
AP3S2	P1P2	0.202316	0.17743	0.123131	10	P1P2	0.860151	-0.0150835	10	P1P2	0.221396	0.224456	10
AP4B1	P1P2	0.522069	-0.0422647	-0.0119302	10	P1P2	0.10868	0.0211171	10	P1P2	0.917315	-0.131128	10
AP4E1	P1P2	0.12746	-0.199461	-0.178443	10	P1P2	0.837126	-0.00438979	10	P1P2	0.142222	-0.451205	10
AP4M1	P1P2	0.697373	0.0342826	0.00536643	10	P1P2	0.650535	0.00155725	10	P1P2	0.50125	-0.129529	10
AP4S1	P1P2	0.728545	-0.00792002	-0.00108935	10	P1P2	0.0159276	-0.0477619	10	P1P2	0.291785	-0.291452	10
AP5B1	P1P2	0.00626367	-0.333663	-0.735116	10	P1P2	0.682801	0.00881798	10	P1P2	0.00609974	-0.603211	10
AP5M1	P1P2	0.328647	-0.111216	-0.0537473	10	P1P2	0.810707	0.0268237	10	P1P2	0.401429	-0.194103	10
AP5S1	P1P2	0.275165	0.146761	0.0822461	9	P1P2	0.250039	-0.0972654	10	P1P2	0.90109	-0.0392817	10
AP5Z1	P1P2	0.55914	-0.113672	-0.0287	10	P1P2	0.961794	-0.00320565	10	P1P2	0.763082	-0.171852	10
APAF1	P1P2	0.206173	0.0617127	0.0423206	10	P1P2	0.684528	-0.0011438	10	P1P2	0.15011	0.286193	10
APBA1	P1P2	0.857481	-0.0528655	-0.00353013	9	P1P2	0.0919652	-0.0495108	10	P1P2	0.416974	-0.128802	10
APBA2	P1P2	0.985215	-0.0583817	-0.000377679	10	P1P2	0.499552	-0.00866761	10	P1P2	0.883975	-0.126024	10
APBA3	P1P2	0.348799	0.139936	0.0640103	8	P1P2	0.201191	0.0176798	9	P1P2	0.283043	0.221779	9
APBB1	P1P2	0.0423829	-0.259944	-0.356854	10	P1P2	0.302983	0.0314697	10	P1P2	0.0800413	-0.490253	10
APBB1IP	P1P2	0.231307	-0.165055	-0.104944	10	P1P2	0.019572	0.0718041	10	P1P2	0.767577	0.0407961	10
APBB2	P1P2	0.64805	-0.104916	-0.0197653	10	P1P2	0.684312	0.0182065	10	P1P2	0.47256	-0.211098	10
APBB3	P1P2	0.171704	0.159723	0.122223	10	P1P2	0.0188757	-0.110364	9	P1P2	0.96535	-0.0433536	10
APC	P2	0.263322	0.186763	0.108232	10	P2	0.0219063	-0.0477397	10	P2	0.644331	0.138289	10
APC2	P2	0.884132	0.00655876	0.000350782	10	P1	0.432908	0.0141189	10	P2	0.859853	-0.0963838	10
APCDD1	P1P2	0.507634	-0.104016	-0.0306276	8	P1P2	0.201191	-0.0680042	9	P1P2	0.186564	-0.349487	9
APCDD1L	P1P2	0.464212	-0.0184814	-0.00615954	10	P1P2	0.237616	0.026003	10	P1P2	0.341312	0.0622255	10
APCS	P1P2	0.209236	-0.173618	-0.117949	9	P1P2	0.770308	0.0209337	10	P1P2	0.241012	-0.095004	10
APEH	P1P2	0.945865	-0.0255783	-0.000618247	10	P1P2	0.591524	0.00455947	10	P1P2	0.927606	0.152381	10
APEX1	P1P2	0.118323	0.14275	0.13232	10	P1P2	0.247266	-0.0406427	10	P1P2	0.297211	0.233121	10
APEX2	P1P2	0.248982	0.150388	0.0908089	9	P1P2	0.773482	0.00827294	9	P1P2	0.195681	0.42133	9
APH1A	P1P2	0.561636	0.0421446	0.0105591	10	P1P2	0.126356	-0.0450942	10	P1P2	0.98038	0.0489144	10
APH1B	P1P2	0.857285	0.0995868	0.00665986	10	P1P2	0.287861	-0.0338671	10	P1P2	0.622729	-0.0511582	10
API5	P1P2	0.709806	0.0623647	0.00928363	10	P1P2	0.00157627	-0.0791693	10	P1P2	0.392728	-0.0945764	10
APIP	P1P2	0.50603	-0.0769954	-0.0227771	9	P1P2	0.123395	-0.0406857	10	P1P2	0.252607	-0.381769	10
APITD1	P1P2	0.139106	0.147666	0.126499	10	P1P2	0.739269	-0.00784138	10	P1P2	0.123736	0.3095	10
APITD1-CORT	P1P2	0.139106	0.147666	0.126499	10	P1P2	0.739269	-0.00784138	10	P1P2	0.123736	0.3095	10
APLF	P1P2	0.0605127	0.247228	0.301162	10	P1P2	0.980423	-0.0119286	10	P1P2	0.0564088	0.416714	10
APLN	P1P2	0.503073	0.102357	0.0305401	10	P1P2	0.176938	-0.0389639	10	P1P2	0.645811	0.128354	10
APLNR	P1P2	0.808359	-0.146832	-0.0135667	10	P1P2	0.238552	0.0291072	10	P1P2	0.961829	-0.21852	10
APLP1	P1P2	0.552675	-0.0486452	-0.0125276	10	P1P2	0.83552	-0.0250905	10	P1P2	0.538104	-0.151359	10
APLP2	P1P2	0.241398	-0.175344	-0.108234	10	P1P2	0.0307472	-0.0414613	10	P1P2	0.104858	-0.496192	10
APMAP	P1P2	0.0159391	-0.260795	-0.468788	10	P1P2	0.67645	0.0209244	10	P1P2	0.0283531	-0.359997	10
APOA1	P1P2	0.488442	-0.114585	-0.0356574	10	P1P2	0.634953	-0.0200634	10	P1P2	0.456109	-0.273063	10
APOA1BP	P1P2	0.620691	-0.131783	-0.0272955	10	P1P2	0.568289	-0.0127335	10	P1P2	0.558512	-0.293154	10
APOA2	P1P2	0.0493338	-0.258267	-0.337518	10	P1P2	0.722362	-9.1508e-05	10	P1P2	0.0741336	-0.433968	10
APOA4	P1P2	0.554859	-0.0965785	-0.0247064	10	P1P2	0.904326	0.0104458	10	P1P2	0.547281	-0.160331	10
APOA5	P1P2	0.134724	-0.258682	-0.225197	10	P1P2	0.886079	-0.000755848	10	P1P2	0.152459	-0.531965	10
APOB	P1P2	0.74352	0.045447	0.00584936	10	P1P2	0.670335	0.0216637	10	P1P2	0.624604	0.145946	10
APOBEC1	P1P2	0.267777	0.142564	0.0815788	10	P1P2	0.936171	0.0245578	10	P1P2	0.22084	0.217624	10
APOBEC2	P1P2	0.861011	0.0272801	0.00177297	10	P1P2	0.14276	-0.0626476	10	P1P2	0.640323	-0.0646802	10
APOBEC3A	P1P2	0.545169	-0.0655382	-0.0172673	9	P1P2	0.617564	-0.0471744	10	P1P2	0.423853	-0.212439	10
APOBEC3A_B	P1P2	0.545169	-0.0655382	-0.0172673	9	P1P2	0.617564	-0.0471744	10	P1P2	0.423853	-0.212439	10
APOBEC3B	P1P2	0.022459	0.277842	0.458053	10	P1P2	0.00985924	-0.0879747	10	P1P2	0.129218	0.380012	10
APOBEC3C	P1P2	0.299029	0.161373	0.0846054	10	P1P2	0.850465	-0.0244345	10	P1P2	0.387611	0.247049	10
APOBEC3D	P1P2	0.299029	0.161373	0.0846054	10	P1P2	0.850465	-0.0244345	10	P1P2	0.387611	0.247049	10
APOBEC3F	P1P2	0.628246	0.0817708	0.0165071	10	P1P2	0.826581	-0.016408	10	P1P2	0.664419	0.129116	10
APOBEC3G	P1P2	0.655438	0.109956	0.0201735	9	P1P2	0.0520513	-0.0511488	10	P1P2	0.905172	-0.0462239	10
APOBEC3H	P1P2	0.631593	-0.064674	-0.0129065	8	P1P2	0.484825	0.0233695	8	P1P2	0.954692	-0.079762	8
APOBEC4	P1P2	0.514675	0.0840516	0.0242461	10	P1P2	0.13139	0.0135231	10	P1P2	0.37085	0.267711	10
APOBR	P2	0.427773	0.0605583	0.0223331	10	P2	0.0828045	0.0560548	10	P2	0.192246	0.208709	10
APOC1	P1P2	0.870339	-0.0444766	-0.00268244	10	P1P2	0.669585	-0.012759	10	P1P2	0.743624	-0.0728437	10
APOC2	P1P2	0.76605	0.00378536	0.000438128	10	P1P2	0.524227	0.0074139	10	P1P2	0.597455	0.00960133	10
APOC3	P1P2	0.268546	0.197682	0.112873	10	P1P2	0.171719	0.0407934	10	P1P2	0.0984585	0.420229	10
APOC4	P1P2	0.985688	-0.0634562	-0.000397276	10	P1P2	0.416035	0.028415	10	P1P2	0.646868	-0.0794607	10
APOD	P1P2	0.396845	0.0775649	0.031133	10	P1P2	0.0585282	-0.0928725	10	P1P2	0.994125	-0.0959919	10
APOE	P1P2	0.557071	-0.0865857	-0.0220005	9	P1P2	0.835799	-0.000234653	9	P1P2	0.578261	-0.14551	9
APOF	P1P2	0.223373	0.0263387	0.0171457	10	P1P2	0.807519	0.00299652	10	P1P2	0.170248	0.0660424	10
APOH	P2	0.375095	-0.0613622	-0.0261316	9	P2	0.212217	0.0197495	9	P2	0.584752	-0.11844	9
APOL1	P1P2	0.45396	-0.192101	-0.0658871	10	P1P2	0.738825	0.0245315	10	P1P2	0.604628	-0.1601	10
APOL2	P1P2	0.776142	0.047575	0.00523606	10	P1P2	0.448146	-0.0150365	10	P1P2	0.840348	-0.120473	10
APOL3	P1P2	0.25568	0.0849905	0.0503401	10	P1P2	0.740156	-0.02012	10	P1P2	0.344159	0.2488	10
APOL4	P1P2	0.668586	0.100043	0.0174919	9	P1P2	0.293226	-0.0486115	10	P1P2	0.980028	0.0709849	10
APOL5	ENST00000249044.2	0.547135	0.00506996	0.00132785	10	ENST00000249044.2	0.792418	-0.00174239	10	ENST00000249044.2	0.540635	0.0522194	10
APOL6	P1P2	0.635735	0.00104351	0.000205282	10	P1P2	0.98054	-0.0158107	10	P1P2	0.716723	0.135578	10
APOLD1	P1P2	0.524191	-0.151309	-0.0424438	10	P1P2	0.770757	-0.00154096	10	P1P2	0.63517	-0.283978	10
APOM	P1P2	0.469568	-0.179271	-0.0588547	10	P1P2	0.331994	-0.039847	10	P1P2	0.401181	-0.468664	10
APOO	P1P2	0.279602	0.0492067	0.0272339	10	P1P2	0.36189	-0.0576359	10	P1P2	0.637271	0.0371657	10
APOOL	P1P2	0.582203	-0.179674	-0.0422099	10	P1P2	0.0257391	-0.0618821	10	P1P2	0.229397	-0.43257	10
APOPT1	P1P2	0.734344	-0.0745413	-0.00999602	10	P1P2	0.00335763	-0.0839327	10	P1P2	0.162184	-0.515482	10
APP	P1P2	0.601002	0.0994704	0.0219953	9	P1P2	0.0870572	-0.0844337	10	P1P2	0.982612	0.114996	10
APPBP2	P1P2	0.219341	0.204893	0.135	10	P1P2	0.347528	-0.0592931	10	P1P2	0.402918	0.300987	10
APPL1	P1P2	0.147702	-0.240199	-0.199513	10	P1P2	0.164599	-0.0434845	10	P1P2	0.0999373	-0.75488	10
APPL2	P1P2	0.992193	0.0288145	9.80795e-05	10	P1P2	0.558764	-0.0330875	10	P1P2	0.664526	-0.0983052	10
APRT	P1P2	0.727431	0.0130593	0.0018049	10	P1P2	0.574683	-0.0186386	10	P1P2	0.668595	-0.00692155	10
APTX	P1	0.0545548	-0.306108	-0.386665	10	P2	0.446389	-0.0467434	10	P1	0.0334705	-0.646254	10
AQP1	ENST00000509504.1	0.524964	0.0759107	0.0212451	10	ENST00000509504.1	0.455833	0.0148574	10	ENST00000509504.1	0.336182	0.333923	10
AQP10	P1P2	0.216242	0.253357	0.168498	10	P1P2	0.604071	0.00829205	10	P1P2	0.369592	0.259385	10
AQP11	P1P2	0.667242	-0.0610936	-0.0107351	10	P1P2	0.863846	0.027793	10	P1P2	0.994595	-0.141441	10
AQP12A	P1P2	0.0138547	0.35303	0.656072	9	P1P2	0.0910899	-0.0719017	10	P1P2	0.0661832	0.39698	10
AQP12B	P1P2	0.0737023	-0.190396	-0.215627	8	P1P2	0.543452	-0.0409641	10	P1P2	0.0630124	-0.509372	8
AQP2	P1P2	0.51899	0.0543265	0.0154744	10	P1P2	0.944706	0.0104296	10	P1P2	0.454331	0.138036	10
AQP3	P1	0.523987	-0.14207	-0.0398762	9	P2	0.59776	0.012195	9	P1	0.56077	-0.162657	9
AQP4	P1P2	0.625696	0.0315252	0.00641969	9	P1P2	0.492749	0.00636258	9	P1P2	0.469699	0.157616	9
AQP5	P1P2	0.127979	-0.13403	-0.11967	10	P1P2	0.474599	0.0108642	10	P1P2	0.181576	-0.417952	10
AQP6	P1P2	0.375797	0.056859	0.0241677	10	P1P2	0.698181	-0.001138	10	P1P2	0.399367	0.0462291	10
AQP7	P1P2	0.676217	0.0717902	0.0121982	10	P1P2	0.757644	-0.0332866	10	P1P2	0.969811	0.149475	10
AQP8	P1P2	0.225908	-0.130065	-0.0840311	9	P1P2	0.653712	-0.0239757	10	P1P2	0.123988	-0.242202	10
AQP9	P1P2	0.562336	-0.112061	-0.0280156	10	P1P2	0.407081	-0.0110546	10	P1P2	0.413938	-0.330771	10
AQPEP	P1P2	0.258981	-0.157696	-0.0925255	10	P1P2	0.0131139	0.0637845	10	P1P2	0.726095	-0.145971	10
AQR	P1P2	0.0090415	-0.281834	-0.576001	8	P1P2	0.0022835	-0.168477	10	P1P2	0.000298286	-0.919759	10
AR	P1P2	0.636687	0.0544594	0.0106781	10	P1P2	0.413177	0.0228171	10	P1P2	0.623666	0.252261	10
ARAF	P1P2	0.173289	-0.301078	-0.229189	10	P1P2	0.0139187	0.0514676	10	P1P2	0.407655	-0.308599	10
ARAP1	P1	0.134956	0.209054	0.181837	10	P2	0.0019602	0.0672194	10	P1	0.0728077	0.485746	10
ARAP2	P1P2	0.471392	0.100393	0.0327901	10	P1P2	0.677525	0.00970263	10	P1P2	0.372743	0.143539	10
ARAP3	P1P2	0.806293	-0.019052	-0.0017815	10	P1P2	0.41789	0.0221438	10	P1P2	0.912876	0.108154	10
ARC	P1P2	0.0698057	-0.283185	-0.327393	9	P1P2	0.214039	-0.0374796	9	P1P2	0.0315455	-0.626081	9
ARCN1	P1P2	0.820716	0.0193675	0.00166186	4	P1P2	2.61108e-07	-0.27661	10	P1P2	0.000239685	-0.770908	10
AREG	P1P2	0.307295	0.0750353	0.0384514	9	P1P2	0.91481	0.0159215	10	P1P2	0.243383	0.247035	10
AREL1	P1P2	0.569204	-0.0837451	-0.0204951	9	P1P2	0.360267	-0.0202715	10	P1P2	0.580701	-0.182775	10
ARF1	P1P2	0.776937	-0.200384	-0.0219649	10	P1P2	0.914694	-0.0378602	10	P1P2	0.840924	-0.551344	10
ARF3	P1P2	0.0361603	-0.200742	-0.289423	10	P1P2	0.637784	0.0186209	10	P1P2	0.0706257	-0.415304	10
ARF4	P1P2	0.907428	0.00581609	0.000245367	9	P1P2	0.00655671	-0.118688	10	P1P2	0.380852	-0.391021	10
ARF5	P1	0.167878	0.223301	0.17306	10	P1	0.118084	-0.0773048	10	P2	0.354394	0.0035856	10
ARF6	P1	0.246981	-0.118458	-0.0719437	10	P1	0.342424	-0.0158974	10	P1	0.145697	-0.391464	10
ARFGAP1	P1P2	0.83303	-0.0397355	-0.00315258	10	P1P2	0.350553	0.00940943	10	P1P2	0.66571	0.0913014	9
ARFGAP2	P1P2	0.813308	-0.077286	-0.00693602	9	P1P2	0.506203	-0.0492216	10	P1P2	0.650469	-0.118744	10
ARFGAP3	P1P2	0.291438	0.0873566	0.0467755	10	P1P2	0.562822	-0.0325969	10	P1P2	0.433387	0.0121577	10
ARFGEF1	P1P2	0.730216	-0.0547225	-0.00747229	10	P1P2	0.86246	-0.0273385	10	P1P2	0.669024	-0.229036	10
ARFGEF2	P1P2	0.277957	-0.200463	-0.111462	10	P1P2	0.703299	0.0130284	10	P1P2	0.2897	-0.348368	10
ARFIP1	P1P2	0.243848	0.196195	0.120244	10	P1P2	0.501608	-0.0435628	10	P1P2	0.347096	0.193105	10
ARFIP2	P1P2	0.913935	-0.135729	-0.00530496	10	P1P2	0.0295075	-0.0645643	10	P1P2	0.408824	-0.33847	10
ARFRP1	P1P2	0.0804025	0.206001	0.225516	10	P1P2	0.517263	-0.0567557	10	P1P2	0.198444	0.284098	10
ARG1	P1P2	0.415186	0.020864	0.007965	10	P1P2	0.263033	-0.0432601	10	P1P2	0.6867	-0.00919672	10
ARG2	P1P2	0.884015	-0.126255	-0.00675972	10	P1P2	0.928461	-0.0191288	10	P1P2	0.810422	-0.269572	10
ARGFX	P1P2	0.0350165	-0.268488	-0.390845	10	P1P2	0.506955	0.0280632	10	P1P2	0.0750445	-0.508202	10
ARGLU1	P1P2	0.135448	-0.236099	-0.204988	7	P1P2	0.000959216	-0.0925626	9	P1P2	0.00783702	-0.835195	9
ARHGAP1	P1P2	0.843464	0.0463806	0.00342908	8	P1P2	0.00181845	-0.1373	10	P1P2	0.0575994	-0.159344	10
ARHGAP10	P1P2	0.0447192	-0.252944	-0.341349	9	P1P2	0.816865	-0.0260917	10	P1P2	0.0230224	-0.697993	10
ARHGAP11A	P1P2	0.179108	0.0875461	0.0653868	9	P1P2	0.0171268	-0.11562	10	P1P2	0.703237	0.0285984	10
ARHGAP11B	P1P2	0.649242	0.0617518	0.0115843	9	P1P2	0.00474845	-0.136163	10	P1P2	0.380532	-0.345636	10
ARHGAP12	P1P2	0.0457151	0.248888	0.333495	10	P1P2	0.72975	-0.0325218	10	P1P2	0.060365	0.320611	10
ARHGAP15	P1P2	0.52178	-0.170681	-0.0482194	10	P1P2	0.55344	-0.0229586	10	P1P2	0.432955	-0.371673	10
ARHGAP17	P1P2	0.0189401	0.303461	0.522747	10	P1P2	0.907353	-0.0171458	10	P1P2	0.00904289	0.502441	10
ARHGAP18	P1P2	0.360336	-0.121821	-0.0540025	10	P1P2	0.684636	-0.032627	10	P1P2	0.261069	-0.39174	10
ARHGAP19	P1P2	0.0587663	0.22326	0.274804	10	P1P2	0.210218	-0.0521495	10	P1P2	0.0841618	0.330214	10
ARHGAP20	P1P2	0.132878	0.253868	0.222527	10	P1P2	0.153469	0.0117105	10	P1P2	0.0569055	0.551537	10
ARHGAP21	P1P2	0.0514973	0.250517	0.322719	10	P1P2	0.544622	0.00832388	10	P1P2	0.0744921	0.419401	10
ARHGAP22	P1P2	0.485654	-0.0860215	-0.0269826	10	P1P2	0.0869487	-0.066698	10	P1P2	0.203946	-0.444227	10
ARHGAP23	P1P2	0.959326	-0.0332647	-0.000599886	10	P1P2	0.0111264	0.0543091	10	P1P2	0.563473	0.21894	10
ARHGAP24	P1P2	0.272672	-0.161826	-0.0913279	10	P1P2	0.978313	-0.00502963	10	P1P2	0.315876	-0.331858	10
ARHGAP25	P1P2	0.310769	0.0878902	0.0446098	10	P1P2	0.582218	-0.0104796	10	P1P2	0.353858	0.195788	10
ARHGAP26	P1P2	0.933362	0.00369624	0.000110701	10	P1P2	0.289731	-0.0504412	10	P1P2	0.673319	-0.287894	10
ARHGAP27	P1	0.170036	-0.163762	-0.126008	10	P2	0.0154153	-0.0678632	10	P1	0.303326	-0.177892	10
ARHGAP28	P1P2	0.342861	0.0844726	0.0392697	10	P1P2	0.667018	0.00919703	10	P1P2	0.31467	0.205862	10
ARHGAP29	P1P2	0.954956	-0.182023	-0.00364351	10	P1P2	0.731407	-0.0161624	10	P1P2	0.875728	-0.195459	10
ARHGAP30	P1P2	0.772055	-0.00771975	-0.000867327	10	P1P2	0.671406	-0.0402597	10	P1P2	0.620025	-0.18466	10
ARHGAP31	P1P2	0.810156	-0.0323827	-0.00296079	9	P1P2	0.218992	0.0445802	9	P1P2	0.452985	0.204268	9
ARHGAP32	ENST00000310343.9	0.929002	-0.0349467	-0.00111771	10	ENST00000310343.9	0.199718	0.0256668	10	ENST00000310343.9	0.665703	0.0782349	10
ARHGAP33	P1P2	0.253948	0.188495	0.112203	10	P1P2	0.242437	-0.0486459	10	P1P2	0.363029	0.073565	10
ARHGAP35	ENST00000404338.3	0.117626	0.140782	0.130856	10	ENST00000404338.3	0.34392	-0.0348398	10	ENST00000404338.3	0.225259	0.242909	10
ARHGAP36	P1P2	0.953424	0.086836	0.0017987	6	P1P2	0.793524	-0.0180701	6	P1P2	0.887161	0.128392	6
ARHGAP39	P1P2	0.245532	-0.102379	-0.0624401	10	P1P2	0.357113	-0.0305143	10	P1P2	0.174182	-0.51723	10
ARHGAP4	P1	0.504966	-0.138998	-0.041246	10	P2	0.497873	-0.0185989	10	P1	0.261507	-0.511255	10
ARHGAP40	P1P2	0.973863	0.0171679	0.00019747	10	P1P2	0.735058	-0.0179681	10	P1P2	0.878166	-0.0454079	10
ARHGAP42	P1P2	0.186126	0.206685	0.15092	10	P1P2	0.0875464	-0.0771311	10	P1P2	0.605142	0.182804	10
ARHGAP44	P1P2	0.89749	0.00113332	5.32322e-05	10	P1P2	0.444461	-0.0364966	10	P1P2	0.816135	-0.00904066	10
ARHGAP5	P1P2	0.851105	-0.0716269	-0.00501511	9	P1P2	0.44929	-0.0501281	10	P1P2	0.813163	-0.319715	10
ARHGAP6	P1P2	0.666488	0.0637765	0.0112379	10	P1P2	0.718074	-0.0158911	10	P1P2	0.706518	0.00562677	10
ARHGAP8	P2	0.409606	-0.203438	-0.0788592	10	P1	0.440358	-0.0156293	10	P2	0.361168	-0.383582	10
ARHGAP9	P1P2	0.809308	-0.0674382	-0.00619662	9	P1P2	0.692484	-0.022913	9	P1P2	0.619673	-0.109779	9
ARHGDIA	P1P2	0.0304965	0.170633	0.258637	9	P1P2	0.822577	-0.0176716	10	P1P2	0.0607689	0.247718	10
ARHGDIB	P1P2	0.960389	0.0179977	0.000315907	10	P1P2	0.0545515	0.0594715	10	P1P2	0.423853	0.170057	10
ARHGDIG	P1P2	0.985688	0.025298	0.000158381	10	P1P2	0.682262	-0.0190133	10	P1P2	0.885835	-0.0165176	10
ARHGEF1	P2	0.565741	-0.0762176	-0.0188549	10	P1	0.357113	0.0155223	10	P1	0.676116	-0.29389	10
ARHGEF10	P1P2	0.786385	-0.0784799	-0.00819054	10	P1P2	0.90549	0.00318515	10	P1P2	0.829197	-0.209675	10
ARHGEF10L	P1P2	0.96358	-0.0407104	-0.000655943	10	P1P2	0.380038	0.00930764	10	P1P2	0.987311	0.0525457	10
ARHGEF11	P1P2	0.163557	0.164883	0.129652	9	P1P2	0.180405	-0.0404265	9	P1P2	0.374628	0.508131	9
ARHGEF12	P1P2	0.189805	-0.0373455	-0.0269519	10	P1P2	0.970345	-0.0137009	10	P1P2	0.234689	-0.109685	10
ARHGEF15	P1P2	0.0751354	-0.155324	-0.174609	10	P1P2	0.733287	-0.0144813	10	P1P2	0.0842147	-0.394348	10
ARHGEF16	P1P2	0.719321	0.0225492	0.00322629	10	P1P2	0.00152768	-0.0629324	10	P1P2	0.536647	-0.157746	10
ARHGEF17	P1P2	0.35264	0.108612	0.0491652	9	P1P2	0.494154	0.0135579	10	P1P2	0.253157	0.264344	10
ARHGEF18	P1P2	0.549506	0.060881	0.0158307	10	P1P2	0.0252746	0.0577714	10	P1P2	0.352179	0.336894	10
ARHGEF19	P1P2	0.619619	-0.0794917	-0.0165244	9	P1P2	0.469259	-0.0421529	10	P1P2	0.395424	-0.296244	10
ARHGEF2	P1P2	0.924055	-0.162662	-0.00557967	10	P1P2	0.568987	0.0107816	10	P1P2	0.985549	-0.21674	10
ARHGEF25	P1P2	0.113376	0.164634	0.155658	10	P1P2	0.741822	0.0196839	10	P1P2	0.0677854	0.348588	10
ARHGEF26	P1P2	0.0556638	0.233089	0.292394	10	P1P2	0.386532	-0.00457656	10	P1P2	0.00864877	0.418347	9
ARHGEF28	P1P2	0.927117	0.0858813	0.00282252	10	P1P2	0.881787	-0.0303431	10	P1P2	0.972512	0.0702981	10
ARHGEF3	P1P2	0.422094	-0.202914	-0.0760096	10	P1P2	0.26454	0.050172	10	P1P2	0.696256	-0.347591	10
ARHGEF33	ENST00000398800.4	0.0457472	0.278064	0.372505	10	ENST00000398800.4	0.527391	0.025441	10	ENST00000398800.4	0.0193413	0.559311	10
ARHGEF35	ENST00000378115.2	0.373962	0.0525373	0.0224425	10	ENST00000543357.1	0.488092	0.0163202	6	ENST00000378115.2	0.290842	0.183251	10
ARHGEF37	P2	0.184111	-0.110492	-0.0812028	10	P2	0.372823	-0.0329689	10	P2	0.111485	-0.217782	10
ARHGEF38	P1P2	0.193154	-0.113651	-0.0811578	9	P1P2	0.827496	-0.0224357	10	P1P2	0.125761	-0.397748	10
ARHGEF39	P1P2	0.291302	-0.198352	-0.106248	10	P1P2	0.300438	-0.0322341	10	P1P2	0.259448	-0.745355	10
ARHGEF4	P1P2	0.00499257	0.349829	0.805193	9	P1P2	0.00670676	-0.12507	10	P1P2	0.142342	0.167179	10
ARHGEF40	P1P2	0.926646	-0.051261	-0.00169603	10	P1P2	0.964019	-0.0182105	10	P1P2	0.823233	-0.113512	10
ARHGEF5	P1P2	0.825336	0.0294929	0.0024588	9	P1P2	0.94342	-0.0106575	10	P1P2	0.798073	0.0547737	9
ARHGEF6	P1P2	0.0734992	-0.216333	-0.245261	10	P1P2	0.0948349	-0.081799	10	P1P2	0.00959051	-0.713163	10
ARHGEF7	ENST00000370623.3	0.317899	-0.230566	-0.114755	10	ENST00000370623.3	0.25265	0.0463057	10	ENST00000370623.3	0.536453	-0.303924	10
ARHGEF9	P1P2	0.0456419	-0.293895	-0.394007	9	P1P2	0.242173	0.0418058	9	P1P2	0.119062	-0.350942	8
ARID1A	P1P2	0.00793605	-0.325455	-0.683583	10	P1P2	0.100211	-0.013501	10	P1P2	0.00683716	-0.817656	10
ARID1B	P1	0.269702	0.0670945	0.0381845	10	P1	0.251919	-0.0428366	10	P1	0.528909	0.0381234	10
ARID2	P1P2	0.0209572	0.29571	0.496399	10	P1P2	0.0826744	0.0423091	10	P1P2	0.00670498	0.720075	10
ARID3A	P1P2	0.784106	0.0097947	0.00103457	10	P1P2	0.235405	-0.0429733	10	P1P2	0.854766	0.0197327	10
ARID3B	P1P2	0.611304	-0.0527622	-0.0112776	10	P1P2	0.0523005	0.0541548	10	P1P2	0.884789	0.0320459	10
ARID3C	P1P2	0.233393	0.194524	0.122922	10	P1P2	0.209897	-0.0248193	10	P1P2	0.394116	0.257199	10
ARID4A	P1P2	0.744641	0.0697874	0.00893648	10	P1P2	0.122895	-0.0875704	10	P1P2	0.993538	-0.236468	10
ARID4B	P1P2	0.846822	-0.058737	-0.00424127	10	P1P2	0.133393	-0.0607903	10	P1P2	0.543171	-0.155002	10
ARID5A	P1P2	0.107358	-0.184403	-0.178717	10	P1P2	0.938626	-0.011564	10	P1P2	0.149526	-0.441009	10
ARID5B	ENST00000279873.7	0.491424	0.0852166	0.026293	10	ENST00000279873.7	0.634534	-0.00689373	10	ENST00000279873.7	0.468304	0.00704245	10
ARIH1	P1P2	0.0350165	0.233378	0.339734	10	P1P2	0.00628523	-0.0772647	10	P1P2	0.158066	0.219978	10
ARIH2	P1P2	0.773308	-0.0675529	-0.0075421	9	P1P2	0.273707	-0.0127326	10	P1P2	0.697019	0.086894	10
ARIH2OS	P1P2	0.131294	-0.201999	-0.178114	9	P1P2	0.00719139	0.0635087	9	P1P2	0.623841	-0.179412	9
ARL1	P1P2	0.283311	0.140234	0.0768114	10	P1P2	0.0616305	0.0267959	10	P1P2	0.0939532	0.47603	10
ARL10	P1P2	0.313333	-0.0798666	-0.0402523	9	P1P2	0.955033	-0.00935274	9	P1P2	0.324614	-0.2474	9
ARL11	P1P2	0.745703	-0.108572	-0.0138358	9	P1P2	0.595998	0.0106216	10	P1P2	0.825181	-0.229561	10
ARL13A	P1P2	0.1745	0.177913	0.134894	9	P1P2	0.0651669	0.0275891	10	P1P2	0.0572516	0.542232	10
ARL13B	P1P2	0.218099	-0.0983654	-0.0650536	9	P1P2	0.20493	-0.0301447	9	P1P2	0.16899	-0.283876	9
ARL14	P1P2	0.007978	0.2895	0.607401	10	P1P2	0.949502	-0.0595587	10	P1P2	0.0196948	0.379178	10
ARL14EP	P1P2	0.546839	-0.161182	-0.0422522	10	P1P2	0.0437966	-0.09095	10	P1P2	0.112682	-0.596431	10
ARL14EPL	ENST00000601302.2	0.91864	-0.0402939	-0.00148501	10	ENST00000601302.2	0.906422	-0.0124457	10	ENST00000601302.2	0.968402	0.0288925	10
ARL15	P1P2	0.676217	0.125002	0.0212396	10	P1P2	0.699051	-0.03396	10	P1P2	0.770503	0.155375	10
ARL16	P1P2	0.0116081	0.242445	0.469189	9	P1P2	0.801849	0.012606	9	P1P2	0.00705468	0.529189	9
ARL17A	ENST00000329240.4,ENST00000336125.5,ENST00000445552.2	0.844733	-0.00823333	-0.000603343	10	ENST00000329240.4,ENST00000336125.5,ENST00000445552.2	0.253748	0.0232031	10	ENST00000329240.4,ENST00000336125.5,ENST00000445552.2	0.886301	0.0704051	10
ARL17B	ENST00000434041.2,ENST00000450673.3,ENST00000570618.1	0.844733	-0.00823333	-0.000603343	10	ENST00000434041.2,ENST00000450673.3,ENST00000570618.1	0.253748	0.0232031	10	ENST00000434041.2,ENST00000450673.3,ENST00000570618.1	0.886301	0.0704051	10
ARL2	P1P2	0.355406	-0.0864342	-0.0388328	8	P1P2	0.0035018	-0.22357	10	P1P2	0.0114726	-0.858761	10
ARL2BP	P1P2	0.112366	-0.313022	-0.297172	10	P1P2	0.426727	0.0154542	10	P1P2	0.112648	-0.503218	10
ARL3	P1P2	0.00875781	-0.38534	-0.792878	9	P1P2	0.0772697	0.0615078	9	P1P2	0.0352284	-0.616949	9
ARL4A	P1P2	0.110235	-0.239965	-0.229809	10	P1P2	0.927994	-0.0121342	10	P1P2	0.112882	-0.505218	10
ARL4C	P1P2	0.282181	0.175146	0.0962377	10	P1P2	0.692317	-0.00904631	10	P1P2	0.298099	0.33208	10
ARL4D	P1P2	0.782966	-0.0414511	-0.00440447	10	P1P2	0.767276	0.00769134	10	P1P2	0.89468	-0.0943472	10
ARL5A	P1P2	0.0420134	0.245191	0.337533	9	P1P2	0.600693	-0.0431631	10	P1P2	0.0770413	0.441923	10
ARL5B	P1P2	0.00933248	0.346559	0.703516	10	P1P2	0.797179	-0.0243412	10	P1P2	0.0116421	0.522543	10
ARL5C	P1P2	0.766616	-0.173527	-0.0200288	10	P1P2	0.172227	0.0364121	10	P1P2	0.787673	-0.0123943	10
ARL6	P1P2	0.995268	0.00190613	3.92618e-06	10	P1P2	0.342648	-0.0250481	10	P1P2	0.915095	-0.112139	10
ARL6IP1	P1	0.137764	-0.103458	-0.0890635	10	P1	0.318553	-0.032503	10	P1	0.0790812	-0.213781	10
ARL6IP4	P1P2	0.958499	-0.0146715	-0.000270077	10	P1P2	0.593251	0.00407575	10	P1P2	0.870392	0.0285559	10
ARL6IP5	P1P2	0.68219	-0.0986827	-0.0163907	10	P1P2	0.103036	0.0397791	10	P1P2	0.906105	-0.171839	10
ARL6IP6	P1P2	0.631448	-0.0398804	-0.00796261	7	P1P2	0.0188861	-0.0624203	8	P1P2	0.386544	-0.192183	8
ARL8A	P1P2	0.155659	0.236256	0.190854	10	P1P2	0.713575	-0.0115716	10	P1P2	0.201597	0.489192	10
ARL8B	P1P2	0.435326	0.0423752	0.0153053	10	P1P2	0.108744	0.0355912	10	P1P2	0.201337	0.160579	10
ARL9	P1P2	0.846329	-0.0568472	-0.0041192	9	P1P2	0.377094	0.0387261	10	P1P2	0.972512	0.022479	10
ARMC1	P1P2	0.944685	-0.0315042	-0.000778563	10	P1P2	0.713575	-0.0112798	10	P1P2	0.904355	-0.0951065	10
ARMC10	P1P2	0.315034	0.0557478	0.0279655	10	P1P2	0.0034985	-0.0819644	10	P1P2	0.930648	-0.210374	10
ARMC12	P1P2	0.417001	-0.0404603	-0.0153694	9	P1P2	0.702455	0.0199534	9	P1P2	0.606376	0.0954957	9
ARMC2	P1P2	0.277629	-0.13853	-0.0770971	10	P1P2	0.854383	0.0132821	10	P1P2	0.330662	-0.210182	10
ARMC3	P1P2	0.818891	-0.0486251	-0.00421938	9	P1P2	0.558483	-0.00347143	9	P1P2	0.861111	-0.0536404	9
ARMC4	P1P2	0.290833	0.102184	0.054807	8	P1P2	0.647786	-0.0394337	10	P1P2	0.545713	-0.0671004	10
ARMC5	P1P2	0.139225	-0.226157	-0.193654	10	P1P2	0.399063	-0.0221378	10	P1P2	0.097532	-0.366877	10
ARMC6	P1P2	0.680776	0.036575	0.00610785	10	P1P2	0.285469	0.0455313	10	P1P2	0.414275	0.195677	10
ARMC7	P1P2	0.747834	-0.0080914	-0.00102109	9	P1P2	0.058895	-0.0434545	9	P1P2	0.354593	-0.180143	9
ARMC8	P1P2	0.407672	0.115673	0.0450763	10	P1P2	0.311827	-0.0554727	10	P1P2	0.526119	-0.0491057	10
ARMC9	P1P2	0.780976	-0.00168886	-0.00018132	9	P1P2	0.229942	0.0211266	10	P1P2	0.617533	0.0953153	10
ARMCX1	P1P2	0.719321	-0.0943909	-0.0135052	10	P1P2	0.679138	-0.0180219	10	P1P2	0.696474	-0.257298	10
ARMCX2	P1P2	0.668707	-0.0648794	-0.0113386	8	P1P2	0.58423	0.0258233	8	P1P2	0.915277	-0.12971	8
ARMCX3	P1P2	0.992767	-0.0799928	-0.000252183	9	P1P2	0.951843	-0.0152655	10	P1P2	0.752439	-0.241855	10
ARMCX4	P1P2	0.660247	0.0594963	0.0107268	10	P1P2	0.337368	-0.0419368	10	P1P2	0.978501	-0.0778454	10
ARMCX5	P1P2	0.33307	0.117839	0.056264	10	P1P2	0.677632	0.00538925	10	P1P2	0.305753	0.441406	10
ARMCX5-GPRASP2	P1P2	0.33307	0.117839	0.056264	10	P1P2	0.677632	0.00538925	10	P1P2	0.305753	0.441406	10
ARMCX6	P1P2	0.660999	0.060153	0.0108155	10	P1P2	0.191248	-0.0178769	10	P1P2	0.893865	-0.0771739	10
ARMS2	P1P2	0.652055	-0.0861892	-0.0160067	9	P1P2	0.841491	-0.0290114	10	P1P2	0.580801	-0.124609	10
ARNT	P1P2	0.129997	0.225622	0.199916	10	P1P2	0.897811	-0.0115811	10	P1P2	0.128736	0.269622	10
ARNT2	P1P2	0.404489	0.07671	0.0301542	10	P1P2	0.134805	-0.0266108	10	P1P2	0.646022	0.089144	10
ARNTL	P1P2	0.41714	-0.139613	-0.0530135	10	P1P2	0.428268	0.0243976	10	P1P2	0.616808	-0.10412	10
ARNTL2	P1P2	0.742287	-0.0389088	-0.00503589	10	P1P2	0.25571	0.0340503	10	P1P2	0.989073	0.0213916	10
ARPC1A	P1P2	0.180948	0.0644764	0.0478702	10	P1P2	0.0466531	-0.0702393	10	P1P2	0.395424	0.0171078	10
ARPC1B	P1P2	0.00131039	0.316245	0.911609	10	P1P2	0.386129	-0.0633252	10	P1P2	0.00696552	0.387497	10
ARPC2	P2	0.234909	-0.260553	-0.163914	10	P2	0.57739	-0.0490667	10	P2	0.135311	-0.509082	10
ARPC3	P2	0.176143	-0.0702465	-0.0529753	9	P1	0.488787	-0.0581812	10	P2	0.157675	-0.33301	10
ARPC4	P1P2	0.882728	0.0310587	0.00168255	10	P1P2	0.340857	-0.0409647	10	P1P2	0.811449	-0.173365	10
ARPC4-TTLL3	P2	0.357914	0.103886	0.0463563	8	P1	0.331043	0.0233683	10	P2	0.259635	0.298488	8
ARPC5	P1P2	0.0157843	-0.378263	-0.681545	10	P1P2	0.0464105	0.0366304	10	P1P2	0.0785297	-0.591134	10
ARPC5L	P2	0.331001	0.15005	0.0720498	10	P1	0.231027	0.0135519	10	P2	0.254566	0.148272	10
ARPP19	P1P2	0.362364	-0.0595983	-0.0262742	10	P1P2	0.660937	0.0151081	10	P1P2	0.486837	-0.137199	10
ARPP21	ENST00000187397.4	0.482136	0.0142922	0.00452818	10	ENST00000187397.4	0.333755	0.022393	10	ENST00000187397.4	0.339299	0.187907	10
ARR3	P1P2	0.180803	0.114124	0.0847705	10	P1P2	0.723133	0.0109025	10	P1P2	0.128921	0.209636	10
ARRB1	P1P2	0.42467	0.0830892	0.0309049	10	P1P2	0.718513	7.20035e-05	10	P1P2	0.375592	0.0822975	10
ARRB2	P1P2	0.491238	-0.0506421	-0.0156337	10	P1P2	0.00933499	-0.116785	10	P1P2	0.065577	-0.3887	10
ARRDC1	P1P2	0.93348	-0.0320288	-0.000957495	10	P1P2	0.566199	0.00251922	10	P1P2	0.868421	-0.10025	10
ARRDC2	P2	0.783308	0.0277786	0.0029464	10	P2	0.578495	0.00224085	10	P1	0.770053	-0.108328	10
ARRDC3	P1P2	0.109839	0.148292	0.142248	10	P1P2	0.262157	0.0178982	10	P1P2	0.0600234	0.503337	10
ARRDC4	P1P2	0.178704	-0.126129	-0.0943277	9	P1P2	0.282234	-0.101767	10	P1P2	0.0568097	-0.355686	10
ARRDC5	P1P2	0.61291	-0.033283	-0.00707607	9	P1P2	0.135612	-0.0613057	10	P1P2	0.294489	-0.202817	10
ARSA	P1P2	0.117174	-0.232478	-0.216476	10	P1P2	0.028877	0.0429826	10	P1P2	0.282187	-0.223539	10
ARSB	P1P2	0.270217	0.124359	0.0706717	10	P1P2	0.550689	0.0126219	10	P1P2	0.201857	0.242428	10
ARSD	P1P2	0.477161	0.0618486	0.0198741	10	P1P2	0.272678	0.0192994	10	P1P2	0.302427	0.32926	10
ARSE	P1P2	0.754083	-0.0128138	-0.00157073	10	P1P2	0.206129	0.0178755	10	P1P2	0.835056	0.147662	10
ARSF	P1P2	0.429502	-0.154902	-0.0568542	10	P1P2	0.0316449	0.0635133	10	P1P2	0.933458	-0.166223	10
ARSG	ENST00000448504.2	0.932537	0.11694	0.00354722	10	ENST00000448504.2	0.941782	-0.00177063	10	ENST00000448504.2	0.915679	0.208382	10
ARSH	ENST00000381130.2	0.913112	-0.0508587	-0.00200771	10	ENST00000381130.2	0.2296	0.0456553	10	ENST00000381130.2	0.968989	0.183675	10
ARSI	P1P2	0.00863152	-0.434883	-0.897561	10	P1P2	0.850119	-0.000678301	10	P1P2	0.007118	-0.836626	10
ARSJ	P1P2	0.517454	-0.121531	-0.0347734	10	P1P2	0.0728594	0.0786748	10	P1P2	0.615564	-0.0549293	10
ARSK	P1P2	0.546346	-0.0469374	-0.0123226	10	P1P2	0.425105	-0.030362	10	P1P2	0.432869	-0.185879	10
ART1	P1P2	0.0210727	-0.277592	-0.465321	10	P1P2	0.990152	-0.00902064	10	P1P2	0.0211491	-0.829017	10
ART3	P1	0.341976	0.126282	0.0588481	9	P2	0.0242283	0.0425852	10	P1	0.380612	0.244677	10
ART4	P1P2	0.613488	0.0344833	0.00731713	10	P1P2	0.444374	-0.00698919	10	P1P2	0.757139	0.0968758	10
ART5	P1P2	0.38603	0.0306745	0.0126802	10	P1P2	0.682047	-0.0425511	10	P1P2	0.344459	-0.0192656	10
ARTN	P1	0.572071	-0.157641	-0.0382359	9	P1	0.64913	-0.012685	9	P1	0.715939	-0.268226	9
ARV1	P1P2	0.194199	-0.172809	-0.122997	10	P1P2	0.343621	0.0188975	10	P1P2	0.358464	-0.339321	10
ARVCF	P2	0.0231592	-0.282289	-0.46162	9	P2	0.574783	0.0178096	10	P2	0.0552574	-0.414016	10
ARX	P1	0.497983	-0.0908408	-0.0275053	10	P1	0.305265	-0.0387509	10	P1	0.370535	-0.260958	10
AS3MT	P1P2	0.640819	0.0964119	0.018633	10	P1P2	0.406748	0.0220249	10	P1P2	0.348381	0.415801	10
ASAH1	P1P2	0.403404	-0.0983689	-0.0387829	10	P1P2	0.648843	-0.0100142	10	P1P2	0.454509	-0.203136	10
ASAH2	ENST00000395526.4	0.629825	0.0238081	0.00478018	10	ENST00000395526.4	0.491929	-0.017197	10	ENST00000395526.4	0.678487	0.167645	10
ASAH2B	P1P2	0.758818	-0.0243052	-0.00291328	10	P1P2	0.847356	-0.030882	10	P1P2	0.503033	-0.160692	10
ASAP1	P1P2	0.806522	0.0555554	0.00518797	10	P1P2	0.597935	-0.0190452	10	P1P2	0.777607	0.0851412	10
ASAP2	P1P2	0.178926	-0.136416	-0.101947	10	P1P2	0.777959	-0.00441376	10	P1P2	0.256906	-0.338622	10
ASAP3	P1P2	0.28185	-0.241619	-0.132886	10	P1P2	0.0205616	0.0430358	10	P1P2	0.641904	-0.405667	10
ASB1	P1P2	0.422351	0.0415992	0.0155717	10	P1P2	0.655303	-0.0380329	10	P1P2	0.532674	-0.0869794	10
ASB10	P1P2	0.655957	-0.0618643	-0.0113289	10	P1P2	0.0460086	-0.0739589	10	P1P2	0.274872	-0.199479	10
ASB11	P2	0.59272	0.0554676	0.0125995	10	P1	0.314718	0.0331408	10	P2	0.528042	0.210788	10
ASB12	ENST00000396130.2	0.688292	-0.102214	-0.016582	10	ENST00000362002.2	0.211343	-0.0279167	10	ENST00000362002.2	0.492947	-0.252136	10
ASB13	P1P2	0.00475037	-0.454785	-1.05659	10	P1P2	0.8635	-0.00702725	10	P1P2	0.00427949	-0.862518	10
ASB14	P1P2	0.667027	0.0692715	0.0121819	10	P1P2	0.524036	-0.0394483	10	P1P2	0.867031	0.00491017	10
ASB15	P1P2	0.0825811	-0.214609	-0.232447	10	P1P2	0.989449	-0.0230802	10	P1P2	0.101711	-0.519495	10
ASB16	P1P2	0.543195	0.00758154	0.00200944	10	P1P2	0.198689	-0.0506944	10	P1P2	0.974038	-0.0996644	10
ASB17	P1P2	0.485562	0.0795185	0.0249494	10	P1P2	0.521264	-0.00616359	10	P1P2	0.633491	0.128344	10
ASB18	P1P2	0.800444	-0.0700884	-0.00677538	10	P1P2	0.334343	-0.0126885	10	P1P2	0.977092	-0.15231	10
ASB2	P1P2	0.458351	-0.0887782	-0.0300782	10	P1P2	0.43498	-0.0251503	10	P1P2	0.338035	-0.215253	10
ASB3	P1P2	0.639016	0.0497449	0.00967479	10	P1P2	0.0780741	-0.0274205	10	P1P2	0.987664	0.0925886	10
ASB4	P1P2	0.399743	-0.229625	-0.0914413	10	P1P2	0.312038	-0.00872374	10	P1P2	0.626064	-0.244691	10
ASB5	P1P2	0.442779	0.030706	0.0108642	10	P1P2	0.544915	0.00286756	10	P1P2	0.396982	0.256496	10
ASB6	P1P2	0.0225028	-0.317172	-0.522624	10	P1P2	0.160882	-0.0519319	10	P1P2	0.0110142	-0.799531	10
ASB7	P1P2	0.776255	-0.0196007	-0.00215599	10	P1P2	0.000383371	0.0671788	10	P1P2	0.192447	0.453612	10
ASB8	P1P2	0.755306	-0.0996734	-0.0121479	9	P1P2	0.160268	-0.0625591	10	P1P2	0.373691	-0.568263	10
ASB9	P1P2	0.646771	0.0655491	0.0124051	10	P1P2	0.735944	-0.017031	10	P1P2	0.747414	0.103438	10
ASCC1	P1P2	0.341279	-0.0183762	-0.00857966	10	P1P2	0.109069	0.0290718	10	P1P2	0.181624	0.044422	10
ASCC2	P1P2	0.593437	-0.0116178	-0.0026329	10	P1P2	0.509593	-0.00382528	10	P1P2	0.623458	0.0161213	10
ASCC3	P1P2	0.969489	-0.08661	-0.00116553	10	P1P2	0.67516	-0.024706	10	P1P2	0.737284	-0.112761	10
ASCL1	P1P2	0.037214	0.378207	0.54057	10	P1P2	0.322921	-0.0504153	10	P1P2	0.0410624	0.623361	10
ASCL2	P1P2	0.431843	0.0717426	0.0261626	10	P1P2	0.0815621	-0.065503	10	P1P2	0.861241	0.0472824	10
ASCL3	P1P2	0.830602	0.0166772	0.00134431	10	P1P2	0.80695	-0.0115417	10	P1P2	0.818194	0.030236	10
ASCL4	ENST00000342331.4	0.158468	-0.193404	-0.154735	9	ENST00000342331.4	0.692317	-0.0182655	10	ENST00000342331.4	0.12442	-0.432391	10
ASCL5	P1P2	0.928177	-0.0206815	-0.000669439	10	P1P2	0.1907	0.035356	10	P1P2	0.715184	0.0881071	10
ASF1A	P1P2	0.224899	0.13291	0.0861271	10	P1P2	0.0262109	-0.0429854	10	P1P2	0.564966	0.0804776	10
ASF1B	P1P2	0.0294948	0.207207	0.317079	10	P1P2	0.00658004	-0.0948803	10	P1P2	0.205893	0.20805	10
ASGR1	P1P2	0.176304	0.202851	0.152896	10	P1P2	0.808885	0.00464693	10	P1P2	0.11362	0.345772	10
ASGR2	P1P2	0.349006	-0.227607	-0.104055	10	P1P2	0.456277	-0.0632396	10	P1P2	0.238363	-0.543836	10
ASH1L	P1P2	0.991247	-0.0590482	-0.000225459	10	P1P2	0.0679775	-0.0462589	10	P1P2	0.621272	-0.262105	10
ASH2L	P1P2	0.640718	-0.063529	-0.0122822	9	P1P2	0.000277948	-0.148667	10	P1P2	0.0560859	-0.705758	10
ASIC1	P1P2	0.408175	-0.0607024	-0.0236225	9	P1P2	0.838098	-0.00294401	9	P1P2	0.530946	-0.226725	9
ASIC2	ENST00000359872.6	0.184552	0.160595	0.117858	10	ENST00000359872.6	0.0604541	-0.0268722	10	ENST00000359872.6	0.379493	0.161656	10
ASIC3	P1P2	0.926552	0.00479318	0.000158798	8	P1P2	0.621409	-0.0246689	9	P1P2	0.910386	-0.0433732	9
ASIC4	P1P2	0.302006	0.187873	0.0976911	10	P1P2	0.810137	-0.0248948	10	P1P2	0.31937	0.364967	10
ASIC5	P1P2	0.754196	-0.0813921	-0.00997183	10	P1P2	0.969173	-0.0157428	10	P1P2	0.803352	-0.188186	10
ASIP	P1P2	0.439789	0.082519	0.0294391	10	P1P2	0.59061	-0.00562714	10	P1P2	0.41926	0.100569	10
ASL	P1P2	0.0421422	0.22015	0.302769	10	P1P2	0.0356312	0.0631156	10	P1P2	0.00556678	0.648217	10
ASMT	P1P2	0.292252	0.0838004	0.0447697	10	P1P2	0.813328	0.00589329	10	P1P2	0.283639	0.406425	10
ASMTL	P1P2	0.45916	-0.200224	-0.067683	10	P1P2	0.494711	0.0337611	10	P1P2	0.519318	-0.217848	10
ASNA1	P1P2	0.863498	-0.0592768	-0.00377824	9	P1P2	0.08703	-0.0779736	10	P1P2	0.420193	-0.270687	10
ASNS	P1P2	0.749695	-0.0964805	-0.0120712	10	P1P2	0.98769	-0.00164502	10	P1P2	0.845648	-0.233777	10
ASNSD1	P1P2	0.456735	0.0736061	0.0250508	10	P1P2	0.613533	0.00933379	10	P1P2	0.409241	0.182512	10
ASPA	P1P2	0.129758	-0.210189	-0.18641	8	P1P2	0.837122	0.00250255	8	P1P2	0.118828	-0.397397	8
ASPDH	P1P2	0.907676	0.000792094	3.33227e-05	9	P1P2	0.133735	-0.0456852	10	P1P2	0.591642	-0.143034	10
ASPG	P1	0.357618	0.0848281	0.0378826	10	P2	0.323523	-0.0361372	9	P1	0.583326	0.153982	10
ASPH	P1P2	0.733431	-0.0493092	-0.00663903	9	P1P2	0.284277	-0.0304993	10	P1P2	0.457445	-0.1148	10
ASPHD1	P1P2	0.646452	-0.038006	-0.00720077	10	P1P2	0.0420001	-0.0555953	10	P1P2	0.385028	-0.161896	10
ASPHD2	P1P2	0.673401	-0.114781	-0.0197109	10	P1P2	0.262595	-0.0128115	10	P1P2	0.685292	-0.326561	10
ASPM	P1P2	0.0368743	-0.249345	-0.357381	9	P1P2	0.0820579	-0.0112685	9	P1P2	0.0101454	-0.544905	9
ASPN	P1P2	0.782169	-0.0865121	-0.00923077	10	P1P2	0.22603	0.0380342	10	P1P2	0.877353	0.0478324	10
ASPRV1	ENST00000320256.4	0.726096	-0.0727277	-0.0101096	10	ENST00000320256.4	0.699704	0.0306059	10	ENST00000320256.4	0.75938	-0.061224	10
ASPSCR1	P1P2	0.205748	0.12968	0.0890466	10	P1P2	0.719722	-0.00308754	10	P1P2	0.255303	0.168539	10
ASRGL1	P1P2	0.102083	0.180312	0.178698	9	P1P2	0.214419	-0.0430059	10	P1P2	0.277144	0.269146	10
ASS1	P1P2	0.641562	-0.049626	-0.00956599	10	P1P2	0.806722	-0.00365406	10	P1P2	0.580095	-0.0639782	10
ASTE1	P1P2	0.623205	0.00131769	0.000270613	10	P1P2	0.523844	-0.0273379	10	P1P2	0.778284	-0.0105887	10
ASTL	ENST00000342380.2	0.636698	0.0156554	0.0030695	9	ENST00000342380.2	0.486483	-0.0285917	10	ENST00000342380.2	0.740619	-0.167366	10
ASTN1	P1P2	0.0768506	-0.225931	-0.251767	10	P1P2	0.65117	-0.00353578	10	P1P2	0.0431015	-0.440553	10
ASTN2	P1P2	0.0572363	-0.229862	-0.285564	10	P1P2	0.680107	0.00192655	10	P1P2	0.0801429	-0.561007	10
ASUN	P1P2	0.0146465	-0.236792	-0.434338	9	P1P2	0.531015	-0.0325348	9	P1P2	0.0198528	-0.876327	9
ASXL1	P1P2	0.78308	-0.0418497	-0.00444418	10	P1P2	0.54238	-0.0386273	10	P1P2	0.593577	-0.0713203	10
ASXL2	P1P2	0.0999346	-0.419202	-0.419321	10	P1P2	0.887007	-0.00663528	10	P1P2	0.0719423	-0.784306	10
ASXL3	P1P2	0.73982	0.0465569	0.0060931	8	P1P2	0.303157	-0.0393774	8	P1P2	0.938174	0.126121	8
ASZ1	P1P2	0.713562	-0.132949	-0.0194861	10	P1P2	0.776607	0.00405948	10	P1P2	0.782466	-0.176981	10
ATAD1	P1P2	0.499865	0.0224711	0.00676711	10	P1P2	0.717744	0.00544389	10	P1P2	0.465869	0.0676302	10
ATAD2	P1P2	0.31977	0.0167936	0.00831556	10	P1P2	0.958749	-0.0128508	10	P1P2	0.345437	0.0753325	10
ATAD2B	P1P2	0.977764	0.0679583	0.000663663	10	P1P2	0.978313	-0.0282935	10	P1P2	0.71478	0.16341	9
ATAD3A	P1P2	0.998753	0.0349042	1.89154e-05	9	P1P2	0.195627	-0.0767134	10	P1P2	0.524006	0.0101479	10
ATAD3B	P1	0.689711	-0.0429468	-0.00692873	10	P1	0.391467	0.0311343	10	P1	0.321497	0.165376	9
ATAD3C	P1P2	0.604839	-0.164582	-0.0359382	8	P1P2	0.872448	0.015895	8	P1P2	0.731325	-0.249255	8
ATAD5	P1P2	0.162332	-0.15832	-0.125008	9	P1P2	0.438879	-0.0387989	9	P1P2	0.0975368	-0.445995	9
ATAT1	P1P2	0.0331994	0.256835	0.379826	10	P1P2	0.175342	0.0319315	10	P1P2	0.0124353	0.459888	10
ATCAY	P1P2	0.602702	-0.0258904	-0.00569323	10	P1P2	0.885615	-0.0222494	10	P1P2	0.657483	-0.000287853	10
ATE1	P1P2	0.916993	-0.00781909	-0.000294264	10	P1P2	0.10009	0.0446581	10	P1P2	0.783144	0.0769645	10
ATF1	P1P2	0.819405	-0.0905195	-0.00783007	10	P1P2	0.988628	0.0194403	10	P1P2	0.975107	0.025519	9
ATF2	P1P2	0.510037	-0.107883	-0.0315449	9	P1P2	0.124041	-0.0511829	10	P1P2	0.284102	-0.238976	10
ATF3	P1P2	0.289791	-0.155842	-0.0838296	9	P1P2	0.40958	-0.0512555	10	P1P2	0.11165	-0.3615	10
ATF4	P1P2	0.529032	-0.100324	-0.0277415	10	P1P2	0.360576	0.0162917	10	P1P2	0.794025	-0.322967	10
ATF5	P1P2	0.688694	0.0172207	0.00278929	7	P1P2	2.59037e-05	-0.317079	10	P1P2	0.00238104	-0.937072	10
ATF6	P1P2	0.946691	0.0418184	0.000994929	10	P1P2	0.051012	-0.0403508	10	P1P2	0.630872	-0.118976	10
ATF6B	P1P2	0.893855	-0.0924155	-0.0045037	10	P1P2	0.0835101	0.0388046	10	P1P2	0.703019	-0.102612	10
ATF7	P1P2	0.310344	0.0922134	0.0468588	10	P1P2	0.578897	-0.0126308	10	P1P2	0.331761	0.316899	10
ATF7IP	P1	0.635946	0.0626765	0.0123209	10	P2	0.433253	0.0109971	10	P1	0.452114	0.239818	10
ATF7IP2	P1P2	0.368726	0.126081	0.0546302	10	P1P2	0.100393	-0.0523248	10	P1P2	0.77332	0.0853605	10
ATG10	P1P2	0.21845	-0.0891133	-0.0588726	9	P1P2	0.0203857	-0.0344342	10	P1P2	0.075673	-0.487422	10
ATG12	P1P2	0.801361	-0.154871	-0.0148943	10	P1P2	0.657214	-0.0275496	10	P1P2	0.716283	-0.474427	10
ATG13	P1P2	0.700007	0.00748262	0.00115904	10	P1P2	0.978313	0.0103194	10	P1P2	0.71134	0.0409498	10
ATG14	P1P2	0.289611	0.140997	0.0758827	10	P1P2	0.554128	-0.00887823	10	P1P2	0.328398	0.366397	10
ATG16L1	P1P2	0.76198	0.0407253	0.00480789	10	P1P2	0.467997	0.0049962	10	P1P2	0.791869	-0.0192318	10
ATG16L2	P1P2	0.0623435	-0.122472	-0.147604	10	P1P2	0.392035	0.0331472	10	P1P2	0.0865693	-0.159085	10
ATG2A	P1P2	0.773189	-0.110692	-0.0123659	9	P1P2	0.69145	-0.0029457	10	P1P2	0.600934	-0.204889	10
ATG2B	P1P2	0.237195	0.154669	0.0966516	10	P1P2	0.438272	-0.0401084	10	P1P2	0.294489	0.0882852	10
ATG3	P1P2	0.0360813	0.216004	0.311632	10	P1P2	0.508179	0.0114497	10	P1P2	0.0167279	0.454214	10
ATG4A	P1P2	0.797925	0.0219131	0.00214832	10	P1P2	0.962613	-0.00989237	10	P1P2	0.76196	0.0324599	10
ATG4B	P1P2	0.592105	-0.0220853	-0.00502665	10	P1P2	0.985787	0.00397929	9	P1P2	0.567857	-0.101491	10
ATG4C	P1P2	0.356302	-0.218146	-0.0977692	10	P1P2	0.0983429	0.0603125	10	P1P2	0.739618	-0.164226	10
ATG4D	P1P2	0.711794	0.0397522	0.00586924	10	P1P2	0.274481	-0.0207742	10	P1P2	0.936034	-0.0154951	10
ATG5	P1P2	0.295959	-0.145483	-0.0769271	9	P1P2	0.304157	-0.0670508	10	P1P2	0.154538	-0.36446	10
ATG7	P1P2	0.047214	-0.15274	-0.202522	10	P1P2	0.744266	-0.0154968	10	P1P2	0.0507761	-0.40058	10
ATG9A	P1P2	0.0219141	-0.309666	-0.513822	10	P1P2	0.833225	-0.00599144	10	P1P2	0.0182125	-0.545008	10
ATG9B	P1P2	0.321793	-0.21073	-0.103768	10	P1P2	0.111956	0.0565292	10	P1P2	0.713975	-0.380998	10
ATHL1	P1P2	0.113714	-0.292488	-0.276163	10	P1P2	0.86766	-0.00148605	10	P1P2	0.111882	-0.541556	10
ATIC	P1P2	0.714717	0.114337	0.0166779	7	P1P2	0.00370163	-0.203307	10	P1P2	0.116642	-0.428001	10
ATL1	P1P2	0.237372	-0.169962	-0.106153	10	P1P2	0.276811	0.0211966	10	P1P2	0.408824	-0.233689	10
ATL2	P1P2	0.0150977	-0.312911	-0.569838	10	P1P2	0.7871	-0.00931211	10	P1P2	0.0169983	-0.675762	10
ATL3	P1P2	0.28133	0.041478	0.0228454	9	P1P2	0.387113	-0.0351497	9	P1P2	0.37672	0.0404188	9
ATM	P1P2	0.808704	0.0887849	0.00818689	10	P1P2	0.993786	-0.00328068	10	P1P2	0.84438	0.0195119	10
ATMIN	P1P2	0.535553	0.0274996	0.00745783	10	P1P2	0.960857	-0.0173077	10	P1P2	0.496949	-0.0303429	10
ATN1	P1P2	0.480659	-0.0914212	-0.0290868	10	P1P2	0.983704	0.00149634	10	P1P2	0.515411	-0.110409	10
ATOH1	P1P2	0.553072	-0.132991	-0.0342077	10	P1P2	0.276033	0.0113775	10	P1P2	0.750428	-0.245549	10
ATOH7	P1P2	0.601872	-0.0520472	-0.0114762	9	P1P2	0.963902	-0.00591734	10	P1P2	0.708927	0.132199	10
ATOH8	P1P2	0.940084	0.0393151	0.00105496	10	P1P2	0.348434	0.019879	10	P1P2	0.764542	0.0271847	10
ATOX1	P1P2	0.222754	-0.155649	-0.10151	10	P1P2	0.0185068	-0.0690863	10	P1P2	0.0524733	-0.550129	10
ATP10A	P1P2	0.602525	-0.0126118	-0.00277491	9	P1P2	0.734504	0.00804159	10	P1P2	0.546105	0.153808	10
ATP10B	P1P2	0.525448	-0.139075	-0.0388672	10	P1P2	0.108906	0.0193721	10	P1P2	0.903538	-0.242109	10
ATP10D	P1P2	0.188208	-0.241852	-0.17543	10	P1P2	0.0375839	0.0878614	10	P1P2	0.48573	-0.146866	10
ATP11A	P1P2	0.687002	0.0500803	0.00816518	9	P1P2	0.602534	0.0112466	10	P1P2	0.46677	0.270227	10
ATP11B	P1P2	0.139262	-0.29216	-0.250138	9	P1P2	0.996483	-0.0656525	10	P1P2	0.0718725	-0.493728	10
ATP11C	ENST00000361648.2	0.0454905	0.237811	0.319162	10	ENST00000361648.2	0.896998	-0.0277325	10	ENST00000361648.2	0.050811	0.527811	10
ATP12A	P1P2	0.599091	0.0623003	0.0138623	10	P1P2	0.653818	-0.0320923	10	P1P2	0.671707	-0.05563	10
ATP13A1	P1P2	0.282314	-0.123556	-0.0678653	10	P1P2	0.0259741	-0.075419	10	P1P2	0.12064	-0.47467	10
ATP13A2	P1P2	0.770944	-0.00139865	-0.000158016	8	P1P2	0.789538	0.00597018	9	P1P2	0.77967	-0.0923057	9
ATP13A3	P1P2	0.32368	-0.0269276	-0.0131914	10	P1P2	0.337072	-0.0481248	10	P1P2	0.2776	-0.212245	10
ATP13A4	P1P2	0.942089	0.0190096	0.0004925	10	P1P2	0.0535433	-0.0543811	10	P1P2	0.49835	-0.184436	10
ATP13A5	P1P2	0.771198	-0.0587293	-0.00662668	8	P1P2	0.223282	-0.0453608	10	P1P2	0.409994	-0.285006	10
ATP1A1	P1P2	0.904885	0.0850697	0.00369258	10	P1P2	0.00144853	-0.082373	10	P1P2	0.430798	-0.133344	10
ATP1A2	P2	0.418503	0.0469454	0.0177595	10	P2	0.224913	0.0182189	9	P2	0.225371	0.0994156	10
ATP1A3	P1P2	0.33152	0.0898028	0.0430595	9	P1P2	0.15909	-0.069816	10	P1P2	0.991423	-0.0127671	10
ATP1A4	P1	0.0982648	-0.240393	-0.24222	10	P1	0.080081	-0.0509376	10	P1	0.0220813	-0.523609	10
ATP1B1	P1P2	0.387849	0.168561	0.0693355	9	P1P2	0.192851	-0.0476302	10	P1P2	0.938377	0.201433	10
ATP1B2	P1P2	0.243759	-0.145553	-0.0892298	9	P1P2	0.41172	0.0217882	9	P1P2	0.323395	-0.21583	9
ATP1B3	P1P2	0.253825	-0.0800459	-0.0476646	10	P1P2	0.569785	0.0162701	10	P1P2	0.341686	-0.136683	10
ATP1B4	P1P2	0.14845	-0.197402	-0.163531	10	P1P2	0.721152	0.00686807	10	P1P2	0.258144	-0.4217	10
ATP2A1	P1P2	0.187016	-0.180125	-0.131153	10	P1P2	0.284608	0.0215396	10	P1P2	0.466937	-0.235139	9
ATP2A2	P1P2	0.673184	0.0653637	0.0112338	10	P1P2	0.424337	-0.0119315	10	P1P2	0.731405	-0.00758649	10
ATP2A3	P1P2	0.873092	-0.0383082	-0.00225789	9	P1P2	0.689629	0.0226214	9	P1P2	0.599991	-0.00804659	9
ATP2B1	P1P2	0.918258	0.052866	0.00195791	8	P1P2	0.834227	-0.0602769	9	P1P2	0.793881	-0.0494811	9
ATP2B2	P2	0.37868	0.136533	0.0575795	10	P1	0.283485	0.0109881	10	P1	0.279756	0.224856	10
ATP2B3	P1P2	0.580781	0.067434	0.0159136	10	P1P2	0.110374	0.0477871	10	P1P2	0.216102	0.197177	10
ATP2B4	P1P2	0.965343	-0.00387849	-5.94121e-05	9	P1P2	0.547496	-0.0048121	9	P1P2	0.984889	0.0054057	9
ATP2C1	P1P2	0.220568	0.0864744	0.0567668	10	P1P2	0.42255	-0.0388446	10	P1P2	0.326071	0.0978049	10
ATP2C2	P1P2	0.513242	0.0591674	0.0171395	10	P1P2	0.700575	-0.00468139	10	P1P2	0.644543	-0.140422	10
ATP4A	P2	0.361193	0.0843071	0.0372857	10	P1	0.560544	0.00127359	10	P2	0.328179	0.147203	10
ATP4B	P1P2	0.735317	-0.0740128	-0.00988258	8	P1P2	0.268652	-0.140708	10	P1P2	0.230769	-0.191606	10
ATP5A1	P2	0.191077	-0.178622	-0.128392	9	P1	0.537716	0.0228018	10	P2	0.0994828	-0.410522	10
ATP5B	P1P2	0.38053	0.0802966	0.0336934	10	P1P2	0.0142468	-0.13672	10	P1P2	0.552193	-0.0927904	10
ATP5C1	P1P2	0.445603	-0.0413613	-0.01452	10	P1P2	0.915976	-0.0227847	10	P1P2	0.564966	0.0958644	10
ATP5D	P1P2	0.447285	0.0579698	0.0202555	10	P1P2	0.707228	0.00345737	10	P1P2	0.476928	0.192272	10
ATP5E	P1P2	0.15411	0.0957151	0.0777368	10	P1P2	0.193303	-0.0853302	10	P1P2	0.444885	0.0797853	10
ATP5F1	P1P2	0.923113	-0.0842311	-0.00292662	10	P1P2	0.0299937	-0.101472	10	P1P2	0.193959	-0.481985	10
ATP5G1	P1P2	0.354219	0.088654	0.0399589	10	P1P2	0.152708	-0.0284983	10	P1P2	0.56417	0.108306	10
ATP5G2	P1P2	0.40207	-0.0710895	-0.02813	10	P1P2	0.800129	-0.00638476	10	P1P2	0.363729	-0.233042	10
ATP5G3	P1P2	0.667674	-0.00537521	-0.000943004	10	P1P2	0.208139	-0.0532664	10	P1P2	0.857424	-0.223184	10
ATP5H	P1P2	0.284777	-0.229224	-0.125041	10	P1P2	0.7271	0.0139597	10	P1P2	0.312125	-0.308533	10
ATP5I	P1P2	0.470844	0.00143799	0.000470398	10	P1P2	0.0144458	-0.132183	10	P1P2	0.406489	-0.281392	10
ATP5J	P1P2	0.844037	-0.0333689	-0.00245724	10	P1P2	0.691342	-0.0008257	10	P1P2	0.988956	-0.0127253	10
ATP5J2	P1P2	0.10435	0.27416	0.26909	10	P1P2	2.6551e-05	-0.207634	10	P1P2	0.217691	-0.227235	10
ATP5J2-PTCD1	P1	0.159889	0.201431	0.160376	10	P1	2.69328e-05	-0.191086	10	P1	0.101957	-0.227235	10
ATP5L	P1P2	0.709254	-0.0456244	-0.00680707	10	P1P2	0.0924481	-0.0553919	10	P1P2	0.874335	-0.0542525	10
ATP5L2	ENST00000505920.1	0.159977	-0.191844	-0.152697	10	ENST00000505920.1	0.858073	-0.0126498	10	ENST00000505920.1	0.188112	-0.40971	10
ATP5O	P1P2	0.467476	0.129646	0.0428144	10	P1P2	0.352833	-0.0552585	10	P1P2	0.583124	-0.0158589	10
ATP5S	P1P2	0.349006	-0.0669703	-0.0306166	10	P1P2	0.639254	-0.0148177	10	P1P2	0.351417	-0.0300593	10
ATP5SL	P1P2	0.78069	0.0816937	0.00878384	10	P1P2	0.687877	-0.0439361	10	P1P2	0.775462	0.0303331	10
ATP6AP1	P1P2	0.680117	0.0158801	0.00265859	9	P1P2	0.000152047	-0.200807	10	P1P2	0.0212896	-0.430776	10
ATP6AP1L	P1P2	0.804342	0.024837	0.00234857	10	P1P2	0.657108	0.023618	10	P1P2	0.601242	0.0742536	10
ATP6AP2	P1P2	0.35264	-0.15798	-0.0715124	9	P1P2	0.0402355	0.0604251	9	P1P2	0.670569	-0.16625	9
ATP6V0A1	P1P2	0.676434	-0.0480273	-0.00815381	10	P1P2	0.2705	-0.0345266	10	P1P2	0.404576	-0.340464	10
ATP6V0A2	P1P2	0.832799	0.0667727	0.00530575	10	P1P2	0.466556	-0.00909604	10	P1P2	0.895845	-0.0521912	10
ATP6V0A4	P2	0.649116	0.0495124	0.00929237	10	P2	0.140728	0.024375	10	P2	0.346341	0.280007	10
ATP6V0B	P1P2	0.548518	-0.0689703	-0.0179881	10	P1P2	0.183918	-0.0497788	10	P1P2	0.300086	-0.168944	10
ATP6V0C	P1P2	0.834882	-0.101542	-0.00795839	10	P1P2	0.000265086	-0.124368	10	P1P2	0.153136	-0.599389	10
ATP6V0D1	P1P2	0.603529	0.0411463	0.00902346	10	P1P2	0.533941	0.0023788	10	P1P2	0.388907	-0.133188	10
ATP6V0D2	P1P2	0.0208347	0.229747	0.386254	9	P1P2	0.776832	-0.0175911	10	P1P2	0.0715475	0.409181	10
ATP6V0E1	P1P2	0.680559	0.00536858	0.000897273	10	P1P2	0.0723679	-0.0481631	10	P1P2	0.819911	-0.188138	10
ATP6V0E2	P1P2	0.96878	-0.0977757	-0.00134686	10	P1P2	0.966947	-0.0487761	10	P1P2	0.693102	-0.328138	10
ATP6V1A	P1P2	0.153473	-0.153604	-0.125029	7	P1P2	3.13703e-05	-0.286027	10	P1P2	0.000141648	-0.94653	10
ATP6V1B1	P1P2	0.585869	-0.209483	-0.0486418	10	P1P2	0.906073	0.00733544	10	P1P2	0.501438	-0.385165	10
ATP6V1B2	P1P2	0.192857	-0.140039	-0.100095	8	P1P2	1.65819e-05	-0.253703	10	P1P2	0.000294241	-0.96632	10
ATP6V1C1	P1P2	0.140105	-0.202652	-0.172972	4	P1P2	6.36382e-07	-0.243768	10	P1P2	1.48248e-05	-0.895707	10
ATP6V1C2	P1P2	0.14299	0.192018	0.162196	10	P1P2	0.910731	-0.00966755	10	P1P2	0.178515	0.41073	10
ATP6V1D	P1P2	0.362207	0.157034	0.0692589	10	P1P2	0.355428	-0.0296526	10	P1P2	0.395916	0.28885	10
ATP6V1E1	P1P2	0.497076	-0.0332229	-0.0100857	9	P1P2	0.819948	-0.0348648	10	P1P2	0.406072	-0.114271	10
ATP6V1E2	P1P2	0.151387	-0.234735	-0.192462	10	P1P2	0.74271	-0.00423398	10	P1P2	0.125325	-0.465946	10
ATP6V1F	P1P2	0.962043	0.0276019	0.000463858	10	P1P2	0.117704	-0.0737741	10	P1P2	0.457535	-0.157891	10
ATP6V1G1	P1P2	0.701435	-0.0112571	-0.00173373	10	P1P2	0.0257488	-0.122855	10	P1P2	0.258889	-0.464999	10
ATP6V1G2	P1P2	0.734903	-0.0471604	-0.00630866	10	P1P2	0.643145	-0.00276633	10	P1P2	0.674717	0.0392319	10
ATP6V1G3	P1P2	0.911517	-0.0380326	-0.00153025	9	P1P2	0.768623	-0.00911861	10	P1P2	0.982495	-0.0862412	10
ATP6V1H	P1P2	0.0142899	-0.36843	-0.679742	10	P1P2	0.117085	-0.0575439	10	P1P2	0.0046464	-0.846317	10
ATP7A	P1P2	0.154797	0.195857	0.158691	10	P1P2	0.000401081	-0.115226	10	P1P2	0.890256	0.135024	10
ATP7B	P1P2	0.616511	-0.110552	-0.0232224	10	P1P2	0.347453	-0.00758971	10	P1P2	0.476837	-0.242665	10
ATP8A1	P1P2	0.58261	0.00889594	0.00208718	10	P1P2	0.633383	-0.0188672	10	P1P2	0.681076	0.0113404	10
ATP8A2	P1P2	0.215746	0.141216	0.0940581	10	P1P2	0.308814	-0.0577822	10	P1P2	0.345362	0.0208426	10
ATP8B1	P1P2	0.124852	0.0448376	0.0405154	10	P1P2	0.536359	-0.0413586	10	P1P2	0.168512	0.0730843	10
ATP8B2	P1	0.0328336	-0.212946	-0.315944	10	P2	0.153426	-0.0561499	10	P1	0.018941	-0.501449	10
ATP8B3	P1P2	0.824826	-0.00962242	-0.000804799	10	P1P2	0.660086	-0.0153594	10	P1P2	0.971807	0.165313	10
ATP8B4	P1P2	0.9166	0.0122233	0.000462287	9	P1P2	0.0901376	-0.0639003	10	P1P2	0.545126	-0.161763	10
ATP9A	P1P2	0.00357067	-0.376219	-0.920702	9	P1P2	0.611596	0.0255335	9	P1P2	0.00989357	-0.751093	9
ATP9B	P1P2	0.84659	-0.134858	-0.00975386	10	P1P2	0.143603	0.0449969	10	P1P2	0.619194	0.0631265	10
ATPAF1	P1P2	0.902419	-0.0520202	-0.00231966	10	P1P2	0.801947	0.00483884	10	P1P2	0.730298	-0.0053754	10
ATPAF2	P1P2	0.734791	0.0262183	0.00350896	10	P1P2	0.659447	-0.0159801	10	P1P2	0.922576	-0.0807294	10
ATPIF1	P1P2	0.303815	0.125439	0.0649012	10	P1P2	0.328563	-0.0441912	10	P1P2	0.373138	0.170589	10
ATR	P1P2	0.55914	-0.0752494	-0.0189989	10	P1P2	0.00900461	-0.179978	10	P1P2	0.0562566	-0.782689	10
ATRAID	P1P2	0.750032	-0.0987562	-0.0123366	10	P1P2	0.77042	-0.0394002	10	P1P2	0.883859	-0.0139432	10
ATRIP	P1P2	0.880505	-0.00367425	-0.000203069	10	P1P2	0.473692	0.00611072	10	P1P2	0.630034	0.173912	10
ATRN	P1P2	0.755781	0.0418318	0.00508691	9	P1P2	0.199558	0.0123608	9	P1P2	0.503828	0.130548	9
ATRNL1	P1P2	0.775005	-0.00143502	-0.00015885	8	P1P2	0.161849	0.0117864	10	P1P2	0.603293	0.0737717	10
ATRX	P1P2	0.0641772	-0.215041	-0.256463	10	P1P2	0.494339	-0.0427438	10	P1P2	0.0404827	-0.633817	10
ATXN1	P1P2	0.99929	-0.0209786	-6.46862e-06	10	P1P2	0.963082	-0.0316108	10	P1P2	0.999178	-0.0901054	10
ATXN10	P1P2	0.231133	0.152819	0.0972142	10	P1P2	0.917142	-0.0356842	10	P1P2	0.276623	0.268518	10
ATXN1L	P1P2	0.654197	0.0662496	0.0122092	9	P1P2	0.820588	-0.0144039	9	P1P2	0.793282	0.185468	9
ATXN2	P1P2	0.280196	0.149388	0.0825427	10	P1P2	0.222501	0.0322109	10	P1P2	0.1237	0.351162	10
ATXN2L	P1P2	0.248277	-0.201281	-0.121788	9	P1P2	0.765594	-0.0411723	10	P1P2	0.219732	-0.212751	10
ATXN3	P1P2	0.250654	-0.176634	-0.106144	9	P1P2	0.286265	0.0103318	10	P1P2	0.461019	-0.224436	10
ATXN3L	P1P2	0.241428	0.0844232	0.0521071	9	P1P2	0.625868	-0.0549657	10	P1P2	0.351037	0.133026	10
ATXN7	ENST00000398590.3	0.267393	0.114733	0.0657249	10	ENST00000538065.1	0.126393	-0.0414966	10	ENST00000398590.3	0.603088	0.116445	10
ATXN7L1	P1P2	0.889284	-0.0897966	-0.00457599	10	P1P2	0.116263	0.0855103	10	P1P2	0.499676	0.059948	9
ATXN7L2	P1P2	0.880622	-0.0764062	-0.00421843	10	P1P2	0.915743	-0.00564458	10	P1P2	0.890955	-0.0120005	10
ATXN7L3	P1P2	0.854957	0.0229016	0.00155858	10	P1P2	0.539851	0.00855175	10	P1P2	0.710462	0.164272	10
ATXN7L3B	P1P2	0.0766958	0.179895	0.200624	9	P1P2	0.0383187	-0.062919	10	P1P2	0.291515	0.220721	10
AUH	P1P2	0.662226	0.0173605	0.00310742	9	P1P2	0.70843	-0.0640072	10	P1P2	0.435205	0.0043245	10
AUNIP	P1P2	0.225489	0.0680671	0.0440309	9	P1P2	0.0174718	-0.0456265	10	P1P2	0.887696	-0.0448798	10
AUP1	P1P2	0.22422	-0.140652	-0.091329	10	P1P2	0.135304	-0.0372958	10	P1P2	0.114361	-0.328262	10
AURKA	P1P2	0.0140058	-0.235194	-0.435976	6	P1P2	1.68366e-07	-0.266263	10	P1P2	4.57518e-06	-1.03868	10
AURKAIP1	P1P2	0.593745	-0.107391	-0.0243133	10	P1P2	0.556888	0.00238887	10	P1P2	0.422915	-0.187583	10
AURKB	P1P2	0.858675	0.0561042	0.00371249	4	P1P2	6.07118e-08	-0.418558	10	P1P2	1.00158e-05	-1.07113	10
AURKC	P1P2	0.707269	-0.0487309	-0.00732988	10	P1P2	0.596814	0.00364881	10	P1P2	0.746744	0.00483428	10
AUTS2	P1P2	0.946293	-0.0386208	-0.000925911	9	P1P2	0.500486	-0.0544084	10	P1P2	0.663778	-0.316218	10
AVEN	P1P2	0.295742	0.135175	0.0715192	9	P1P2	0.872403	-0.0573978	10	P1P2	0.504066	0.108174	10
AVIL	P1P2	0.057684	-0.198292	-0.245673	10	P1P2	0.609102	0.0286005	10	P1P2	0.103945	-0.34151	9
AVL9	P1P2	0.959613	0.0408261	0.000730948	9	P1P2	1.73007e-06	-0.216974	10	P1P2	0.00463571	-0.721751	10
AVP	P1P2	0.911113	-0.0396177	-0.00160166	10	P1P2	0.670977	0.0261128	10	P1P2	0.656099	0.0237499	10
AVPI1	P1P2	0.482049	0.0434873	0.0137815	9	P1P2	0.812872	-0.00402906	10	P1P2	0.67547	0.148358	10
AVPR1A	P1P2	0.197272	-0.233671	-0.164723	10	P1P2	0.999883	-0.0610617	10	P1P2	0.0514953	-0.544471	10
AVPR1B	P1P2	0.293886	-0.117404	-0.0624382	10	P1P2	0.290133	-0.0244571	10	P1P2	0.237192	-0.324599	10
AVPR2	P1P2	0.826557	0.0436961	0.00361484	10	P1P2	0.617564	0.00689999	10	P1P2	0.755683	0.123646	10
AWAT1	P1P2	0.490491	-0.055565	-0.0171901	10	P1P2	0.0428225	-0.0505827	10	P1P2	0.872247	-0.207824	10
AWAT2	P1P2	0.685347	-0.0949234	-0.0155759	10	P1P2	0.314294	0.0254468	10	P1P2	0.993655	-0.196423	10
AXDND1	P1P2	0.844037	-0.0994234	-0.0073214	10	P1P2	0.570483	-0.0173128	10	P1P2	0.924447	-0.220578	10
AXIN1	P1P2	0.508909	-0.103981	-0.0305039	8	P1P2	0.656198	0.00238682	8	P1P2	0.430307	-0.229471	8
AXIN2	P1	0.616975	-0.151015	-0.0316728	9	P2	0.241799	0.0530799	9	P2	0.263407	0.039011	9
AXL	P1P2	0.706828	-0.114155	-0.0172015	10	P1P2	0.406582	-0.07198	10	P1P2	0.31382	-0.398427	10
AZGP1	P1P2	0.715151	-0.038296	-0.00557598	9	P1P2	0.963433	-0.0211948	10	P1P2	0.630244	-0.0730435	10
AZI1	P1P2	0.129506	0.192932	0.171268	9	P1P2	0.189904	-0.0366711	10	P1P2	0.383017	0.392222	10
AZI2	P1P2	0.0885422	-0.277911	-0.292598	10	P1P2	0.738271	0.0107519	10	P1P2	0.0899211	-0.739866	10
AZIN1	P1P2	0.0559107	0.223329	0.279721	10	P1P2	0.0426119	0.0662297	10	P1P2	0.0117843	0.618597	10
AZU1	P1	0.253147	-0.209422	-0.124947	10	P1	0.0984625	0.0135604	10	P1	0.500033	-0.324311	10
B2M	P2	0.109806	-0.216503	-0.207707	10	P2	0.497873	-0.0144948	10	P2	0.171076	-0.316465	10
B3GALNT1	P1P2	0.735432	-0.0239776	-0.00319998	9	P1P2	0.990977	-0.0210574	9	P1P2	0.955184	-0.0387569	9
B3GALNT2	P1P2	0.402153	0.152916	0.0604947	10	P1P2	0.596916	-0.0105076	10	P1P2	0.404079	0.141657	10
B3GALT1	P1P2	0.548518	0.0743654	0.0193952	10	P1P2	0.330385	-0.0336609	10	P1P2	0.580499	0.0140743	10
B3GALT2	P1P2	0.3285	0.118669	0.0573723	10	P1P2	0.520882	-0.0497553	10	P1P2	0.58697	0.197092	10
B3GALT4	P1P2	0.539465	0.0286864	0.007689	10	P1P2	0.794571	-0.000859488	10	P1P2	0.476654	0.0808132	10
B3GALT5	ENST00000380620.4	0.0658588	-0.232941	-0.275194	10	ENST00000343118.4,ENST00000398714.2	0.0771353	0.0231148	10	ENST00000343118.4,ENST00000398714.2	0.049602	0.321978	10
B3GALT6	P1P2	0.451284	-0.0212567	-0.00734527	10	P1P2	0.0874375	-0.0585547	10	P1P2	0.262008	-0.249018	10
B3GALTL	P1P2	0.595388	0.197507	0.0444787	10	P1P2	0.156368	-0.0486954	10	P1P2	0.872015	0.112087	10
B3GAT1	P1P2	0.756224	-0.020684	-0.00251	10	P1P2	0.285667	0.0437912	10	P1P2	0.410804	0.0284454	9
B3GAT2	P1P2	0.531849	-0.150818	-0.0413561	10	P1P2	0.819834	0.00118156	10	P1P2	0.436419	-0.449605	10
B3GAT3	P1P2	0.745988	0.0351341	0.00447145	10	P1P2	0.0409438	0.0391537	10	P1P2	0.323755	0.161119	10
B3GNT1	P1P2	0.148658	0.189578	0.156935	10	P1P2	0.405171	0.0181472	10	P1P2	0.0860564	0.55544	10
B3GNT2	P1P2	0.340152	-0.121692	-0.0569915	10	P1P2	0.0279844	-0.112198	10	P1P2	0.10354	-0.526872	10
B3GNT3	P1P2	0.379725	-0.0431283	-0.0181368	10	P1P2	0.878889	-0.00408524	10	P1P2	0.417735	-0.313298	10
B3GNT4	P1P2	0.744529	-0.0651063	-0.00834131	10	P1P2	0.463145	-0.0163357	10	P1P2	0.605656	0.0497943	10
B3GNT5	P1P2	0.0490432	-0.209841	-0.27477	10	P1P2	0.462698	-0.0105176	10	P1P2	0.0298302	-0.703491	10
B3GNT6	P1P2	0.356689	-0.00169106	-0.000757106	10	P1P2	0.934769	-0.0265881	10	P1P2	0.390042	-0.16751	10
B3GNT7	P1P2	0.731073	-0.0387638	-0.0052734	8	P1P2	0.109103	-0.0949485	9	P1P2	0.560248	-0.183426	9
B3GNT8	P1P2	0.256052	-0.178776	-0.105777	10	P1P2	0.976789	-0.0197821	10	P1P2	0.216047	-0.387815	10
B3GNT9	P1P2	0.387169	-0.201186	-0.0829087	10	P1P2	0.412423	0.0149742	10	P1P2	0.631919	-0.424793	10
B3GNTL1	P1	0.00440219	-0.388406	-0.915214	10	P1	0.478695	0.0201996	10	P1	0.00594564	-0.706277	10
B4GALNT1	P1P2	0.997043	-0.0553339	-7.11711e-05	10	P1P2	0.848622	0.00578053	10	P1P2	0.937323	-0.154491	10
B4GALNT2	P1P2	0.525061	-0.097058	-0.0271559	10	P1P2	0.477601	0.0325519	10	P1P2	0.804491	-0.128268	10
B4GALNT3	P1P2	0.690476	0.0856796	0.0137817	10	P1P2	0.122254	-0.031417	10	P1P2	0.914044	0.112848	10
B4GALNT4	P1P2	0.592822	-0.0647054	-0.014693	10	P1P2	0.539462	-0.0109214	10	P1P2	0.789373	-0.18858	10
B4GALT1	P1P2	0.533017	0.0961093	0.0262627	10	P1P2	0.439054	0.0185025	10	P1P2	0.323755	0.193455	10
B4GALT2	P1P2	0.443308	0.0371919	0.0131397	10	P1P2	0.492577	-0.0160342	10	P1P2	0.557127	0.0719442	10
B4GALT3	P1P2	0.818252	-0.0600249	-0.00522893	10	P1P2	0.487496	-0.0386341	10	P1P2	0.665596	-0.213089	10
B4GALT4	P1P2	0.77319	-0.0184134	-0.00205703	10	P1P2	0.671406	-0.0159144	10	P1P2	0.800733	-0.0547643	10
B4GALT5	P1P2	0.754984	-0.0322864	-0.00394094	10	P1P2	0.349417	-0.0284429	10	P1P2	0.530645	-0.200929	10
B4GALT6	P1P2	0.891745	-0.0757257	-0.00376807	10	P1P2	0.677525	-0.00383098	10	P1P2	0.873291	-0.0405466	10
B4GALT7	P1P2	0.104231	-0.243119	-0.238744	9	P1P2	0.923442	-0.00662912	10	P1P2	0.13393	-0.464945	10
B9D1	P1P2	0.367543	-0.052167	-0.0226766	10	P1P2	0.957813	-0.0139556	10	P1P2	0.22084	-0.0408266	10
B9D2	P1P2	0.152064	0.317906	0.260039	10	P1P2	0.527967	-0.0191386	10	P1P2	0.168785	0.439768	10
BAALC	P1P2	0.215252	-0.171483	-0.114388	10	P1P2	0.954418	-0.0222656	10	P1P2	0.134581	-0.178502	10
BAAT	P1	0.188656	0.122103	0.0884428	10	P1	0.385244	-0.0286989	10	P1	0.28074	0.215721	10
BABAM1	P1P2	0.256634	0.1696	0.10018	9	P1P2	0.153704	0.0315046	9	P1P2	0.0922558	0.437853	9
BACE1	P1P2	0.489652	-0.113946	-0.0353362	10	P1P2	0.442451	-0.017284	10	P1P2	0.400026	-0.185935	10
BACE2	P1P2	0.124984	0.185646	0.167665	9	P1P2	0.851617	-0.0632774	10	P1P2	0.265468	0.171439	10
BACH1	P1P2	0.470726	0.0228669	0.00748278	9	P1P2	0.517168	-0.0187959	10	P1P2	0.474559	0.0806443	10
BACH2	P1P2	0.461592	-0.194819	-0.0654087	10	P1P2	0.429296	-0.00410151	10	P1P2	0.514841	-0.469997	10
BAD	P1P2	0.793692	-0.104376	-0.0104739	10	P1P2	0.956291	0.00890015	10	P1P2	0.888882	-0.147864	9
BAG1	P1P2	0.331887	0.150806	0.0722377	10	P1P2	0.132029	-0.0745269	10	P1P2	0.883394	0.0163537	10
BAG2	P1P2	0.303048	-0.202864	-0.105183	10	P1P2	0.29161	0.041332	10	P1P2	0.359312	-0.225691	10
BAG3	P1P2	0.301797	-0.25525	-0.132803	10	P1P2	0.867776	-0.0114784	10	P1P2	0.279036	-0.509083	10
BAG4	P1P2	0.201425	0.108146	0.0752571	10	P1P2	0.189904	-0.0489721	10	P1P2	0.403996	0.15193	10
BAG5	P1P2	0.906295	-0.0444424	-0.00189905	10	P1P2	0.871825	-0.00831397	10	P1P2	0.871783	-0.292277	10
BAG6	P1P2	0.0773962	-0.288858	-0.321002	10	P1P2	0.711056	-0.0340399	10	P1P2	0.0420641	-0.432199	10
BAGE	P1P2	0.267649	0.0189491	0.0108471	10	P1P2	0.447706	-0.0503237	10	P1P2	0.456643	0.0246658	10
BAGE3	P1P2	0.520047	-0.0223382	-0.00634308	10	P1P2	0.501327	-0.0084406	10	P1P2	0.400521	-0.037811	10
BAGE4	P1P2	0.520047	-0.0223382	-0.00634308	10	P1P2	0.501327	-0.0084406	10	P1P2	0.400521	-0.037811	10
BAGE5	P1P2	0.520047	-0.0223382	-0.00634308	10	P1P2	0.501327	-0.0084406	10	P1P2	0.400521	-0.037811	10
BAHCC1	P1P2	0.647837	-0.0347393	-0.00654956	10	P1P2	0.665202	-0.0143041	10	P1P2	0.782013	-0.105508	10
BAHD1	P1P2	0.382434	0.118597	0.0495074	8	P1P2	5.86657e-07	-0.211501	10	P1P2	0.0434674	-0.71463	10
BAI1	P1P2	0.222754	-0.236917	-0.154511	10	P1P2	0.255894	-0.0110783	10	P1P2	0.131652	-0.469901	10
BAI2	P1P2	0.220402	0.234814	0.154222	7	P1P2	0.151731	-0.0894663	8	P1P2	0.389169	0.314016	8
BAI3	P1P2	0.155141	0.130604	0.105695	10	P1P2	0.586357	-0.0130414	10	P1P2	0.203946	0.225162	10
BAIAP2	P1P2	0.75566	-0.102449	-0.0124653	10	P1P2	0.13868	0.0658856	10	P1P2	0.793344	0.0940934	10
BAIAP2L1	P1P2	0.582963	-0.0842163	-0.0197368	9	P1P2	0.0937431	-0.0599744	9	P1P2	0.239297	-0.270038	9
BAIAP2L2	P2	0.324116	0.147126	0.0719888	10	P2	0.386612	0.0044143	10	P2	0.184238	0.326299	10
BAIAP3	P1P2	0.1996	-0.248727	-0.174069	10	P1P2	0.78891	-0.0257806	10	P1P2	0.150987	-0.500224	10
BAK1	P1P2	0.704185	0.0886877	0.0135083	10	P1P2	0.687012	0.0097951	10	P1P2	0.638007	0.201636	10
BAMBI	P1P2	0.181388	-0.171431	-0.127097	8	P1P2	0.446058	-0.0493048	9	P1P2	0.0585593	-0.498815	9
BANF1	P1P2	0.822749	-0.131826	-0.01117	10	P1P2	0.977493	0.024612	10	P1P2	0.96535	-0.293111	10
BANF2	P1P2	0.698031	-0.100762	-0.0157315	10	P1P2	0.836208	-0.0168659	10	P1P2	0.710791	-0.243905	10
BANK1	P1P2	0.477095	0.0538669	0.0173125	9	P1P2	0.229383	-0.0572915	9	P1P2	0.874427	-0.105794	9
BANP	P1P2	0.474043	-0.0108338	-0.00351213	10	P1P2	0.000405119	-0.120185	10	P1P2	0.0773371	-0.430602	10
BAP1	P1P2	0.802622	-0.0254	-0.00242543	10	P1P2	0.102293	-0.101097	10	P1P2	0.292324	-0.472534	10
BARD1	P1P2	0.0698099	-0.349448	-0.403991	10	P1P2	0.260597	-0.00638858	10	P1P2	0.0641874	-0.61524	10
BARHL1	P1P2	0.64188	-0.123751	-0.0238278	10	P1P2	0.438272	0.0249905	10	P1P2	0.569755	-0.183506	10
BARHL2	P1P2	0.00487486	0.29981	0.693173	10	P1P2	0.387338	-0.0316401	10	P1P2	0.01131	0.596333	10
BARX1	P1P2	0.45916	-0.100592	-0.0340037	10	P1P2	0.133621	0.0385986	10	P1P2	0.901789	-0.155002	10
BARX2	P1P2	0.399577	-0.0770871	-0.0307115	10	P1P2	0.814355	0.0132365	10	P1P2	0.470655	-0.294075	10
BASP1	P1P2	0.769788	0.0208214	0.00236592	10	P1P2	0.271844	-0.031282	10	P1P2	0.919419	-0.1278	10
BATF	P1P2	0.0135653	0.272964	0.509779	10	P1P2	0.220336	0.0307591	10	P1P2	0.00276303	0.555412	9
BATF2	P1P2	0.643899	0.0764788	0.0146214	10	P1P2	0.423656	-0.00342668	10	P1P2	0.606994	0.167983	10
BATF3	P1P2	0.0127134	0.17746	0.336418	10	P1P2	0.588583	-0.0497651	10	P1P2	0.0515129	0.318868	10
BAX	P1P2	0.0123209	0.216371	0.413129	10	P1P2	0.362354	0.0344811	10	P1P2	0.00883864	0.405672	10
BAZ1A	P1P2	0.506957	0.0715116	0.021098	10	P1P2	0.0384698	0.0695971	10	P1P2	0.250475	0.465986	10
BAZ1B	P1P2	0.438035	0.0486595	0.017444	10	P1P2	0.0357474	-0.0538577	10	P1P2	0.989191	-0.0965154	10
BAZ2A	P1	0.411545	0.058766	0.0226591	10	P1	0.335079	-0.0503294	10	P1	0.678918	0.0808387	10
BAZ2B	P1P2	0.475142	0.0432338	0.0139722	10	P1P2	0.35329	-0.0586247	10	P1P2	0.546692	-0.0451518	10
BBC3	P1P2	0.00665792	-0.331398	-0.72134	10	P1P2	0.915043	-0.0095609	10	P1P2	0.00711172	-0.676954	10
BBIP1	P1P2	0.999002	0.0806894	3.49776e-05	9	P1P2	0.757979	-0.0260238	10	P1P2	0.930414	0.0994739	10
BBOX1	P2	0.63109	0.20313	0.0406075	10	P2	0.0528919	-0.0711663	10	P1	0.650325	0.0963054	9
BBS1	P1P2	0.947281	-0.111824	-0.00263022	10	P1P2	0.958047	-0.000880225	10	P1P2	0.730077	-0.253997	10
BBS10	P1P2	0.282712	0.112434	0.0616873	10	P1P2	0.15883	-0.0318526	10	P1P2	0.517696	0.200869	10
BBS12	P1P2	0.495635	-0.10055	-0.0306516	10	P1P2	0.525952	0.000369558	10	P1P2	0.505289	-0.219461	10
BBS2	P1P2	0.641455	0.0369839	0.00713174	10	P1P2	0.52576	0.0103298	10	P1P2	0.614425	0.105092	10
BBS4	P1P2	0.221799	-0.204519	-0.133764	10	P1P2	0.293091	0.0331007	10	P1P2	0.352637	-0.310249	10
BBS5	P1P2	0.355221	0.15381	0.069138	10	P1P2	0.465478	-0.00643579	10	P1P2	0.515887	0.444361	10
BBS7	P1P2	0.646984	-0.0780092	-0.014752	10	P1P2	0.421786	0.00987193	10	P1P2	0.91416	-0.188169	10
BBS9	P1P2	0.760285	-0.0342599	-0.00407772	10	P1P2	0.728756	0.00803434	10	P1P2	0.844841	-0.0364922	10
BBX	P1P2	0.831295	-0.0617527	-0.00495532	10	P1P2	0.878425	0.00766278	10	P1P2	0.894797	-0.107681	10
BCAM	P1P2	0.72779	-0.0112962	-0.00155881	9	P1P2	0.370252	-0.0353925	9	P1P2	0.581023	-0.173764	9
BCAN	P1P2	0.549407	-0.147437	-0.0383493	10	P1P2	0.0629922	0.0366654	10	P1P2	0.928131	-0.170718	9
BCAP29	P1P2	0.525351	-0.031265	-0.00874014	10	P1P2	0.402028	-0.0528798	10	P1P2	0.357848	-0.288707	10
BCAP31	P1P2	0.845894	-0.0303678	-0.00220726	10	P1P2	0.199152	-0.0635844	10	P1P2	0.685292	-0.145159	10
BCAR1	P2	0.382304	-0.128507	-0.0536633	10	P2	0.56094	-0.0448549	10	P2	0.296049	-0.308451	9
BCAR3	P1	0.319068	0.0807889	0.0400808	9	P1	0.524419	-0.00705105	10	P1	0.454154	0.214449	10
BCAS1	ENST00000395961.3	0.335445	-0.138925	-0.065903	10	ENST00000395961.3	0.480613	-0.00877319	10	ENST00000395961.3	0.326289	-0.453903	10
BCAS2	P1P2	0.736692	-0.00579702	-0.000769346	8	P1P2	4.24127e-05	-0.230516	10	P1P2	0.0293233	-0.523239	10
BCAS3	P1P2	0.683097	0.0575266	0.00952166	9	P1P2	0.430498	-0.0511371	10	P1P2	0.846801	0.0927902	10
BCAS4	P1P2	0.561593	0.00624775	0.00156555	9	P1P2	0.453116	-0.0344272	9	P1P2	0.761508	0.0296058	9
BCAT1	P1P2	0.0600468	-0.203923	-0.249093	10	P1P2	0.599569	-0.00508323	10	P1P2	0.0481497	-0.426815	10
BCAT2	P1P2	0.990655	-0.0858759	-0.000350151	10	P1P2	0.705153	-0.0114947	10	P1P2	0.818995	-0.136449	10
BCCIP	P1P2	0.6396	-0.049187	-0.00954677	9	P1P2	0.844135	-0.0584355	10	P1P2	0.480585	-0.229277	10
BCDIN3D	P1P2	0.511333	0.0806991	0.0235073	10	P1P2	0.890723	0.00930694	10	P1P2	0.490628	0.130066	10
BCHE	P1P2	0.60536	-0.0836666	-0.0182382	9	P1P2	0.668075	0.0148212	9	P1P2	0.609743	-0.139997	9
BCKDHA	P1	0.412137	-0.0207626	-0.00799273	10	P1	0.352985	-0.104646	10	P1	0.105332	-0.326563	10
BCKDHB	P1P2	0.394206	0.15493	0.0626347	10	P1P2	0.933133	-0.00254021	10	P1P2	0.283639	0.243311	10
BCKDK	P1P2	0.0322079	-0.352058	-0.525283	10	P1P2	0.85692	0.00982544	10	P1P2	0.0286734	-0.736512	10
BCL10	P1P2	0.855423	-0.116555	-0.00790467	10	P1P2	0.296342	-0.0114663	10	P1P2	0.582114	-0.179528	10
BCL11A	P1P2	0.759721	-0.0697068	-0.00831922	10	P1P2	0.404342	0.0376534	10	P1P2	0.987664	-0.0988927	10
BCL11B	P1P2	0.587093	-0.0782443	-0.0180974	10	P1P2	0.299616	0.0147043	10	P1P2	0.887696	0.00675895	10
BCL2	P1P2	0.812267	0.0141144	0.00127455	10	P1P2	0.868585	-0.0141201	10	P1P2	0.884905	0.0861093	10
BCL2A1	P1P2	0.257618	-0.131018	-0.0771729	9	P1P2	3.31e-07	-0.207099	10	P1P2	0.000463959	-0.927174	10
BCL2L1	P1	0.0047718	-0.321119	-0.74542	9	P1	0.0165682	-0.0682466	9	P1	0.00131606	-0.81464	9
BCL2L10	P1P2	0.0302217	0.185104	0.281298	10	P1P2	0.799933	0.00766738	9	P1P2	0.0255678	0.479914	10
BCL2L11	P2	0.106262	-0.177026	-0.172357	10	P2	0.746824	-0.0269839	10	P2	0.111816	-0.452803	10
BCL2L12	P1P2	0.39322	0.14243	0.0577361	10	P1P2	0.411669	0.00869158	10	P1P2	0.20113	0.230397	10
BCL2L13	P1P2	0.279589	0.0954737	0.0528428	9	P1P2	0.0462173	-0.0891162	10	P1P2	0.769715	0.00373645	10
BCL2L14	P2	0.0178174	-0.293838	-0.513968	10	P1	0.188518	-0.0691061	10	P2	0.0811135	-0.546528	10
BCL2L15	P1P2	0.694852	0.0367434	0.00580941	10	P1P2	0.499365	0.0191811	10	P1P2	0.879908	0.100804	10
BCL2L2	P1P2	0.534967	0.0276942	0.00752377	10	P1P2	0.574282	0.0215805	10	P1P2	0.290204	0.196073	9
BCL2L2-PABPN1	P1P2	0.835345	-0.112881	-0.00881986	10	P1P2	0.185279	0.0445566	10	P1P2	0.725817	-0.0361436	9
BCL3	P1P2	0.610169	0.118222	0.0253646	9	P1P2	0.0207064	-0.0857673	10	P1P2	0.928776	-0.0544846	10
BCL6	P1P2	0.0645192	-0.2348	-0.279484	10	P1P2	0.00594878	-0.114014	10	P1P2	0.00450508	-0.772207	10
BCL6B	P1P2	0.448882	-0.0745772	-0.025943	10	P1P2	0.707774	-0.0184279	10	P1P2	0.409576	-0.240872	10
BCL7A	P1P2	0.578041	-0.162612	-0.0387082	10	P1P2	0.339816	-0.0209215	10	P1P2	0.40176	-0.351906	10
BCL7B	P1P2	0.514675	-0.0991735	-0.0286082	10	P1P2	0.907819	0.00476136	10	P1P2	0.45238	-0.155899	10
BCL7C	P1P2	0.520025	-0.119771	-0.034012	9	P1P2	0.436711	0.025677	10	P1P2	0.431747	-0.132321	10
BCL9	P1P2	0.602961	0.049275	0.0108263	9	P1P2	0.543549	-0.0716426	10	P1P2	0.9758	-0.0876812	10
BCL9L	P1P2	0.196141	0.179843	0.127227	10	P1P2	0.271524	0.0385382	10	P1P2	0.0727137	0.473795	10
BCLAF1	P1P2	0.227749	-0.160657	-0.103229	8	P1P2	5.03579e-05	-0.193437	10	P1P2	0.00372713	-0.735006	10
BCMO1	P1P2	0.139225	-0.171921	-0.147213	10	P1P2	0.129744	0.0576021	10	P1P2	0.332202	-0.214537	10
BCO2	P1P2	0.587808	-0.0607112	-0.01401	10	P1P2	0.763128	0.00104915	10	P1P2	0.679134	0.0172754	10
BCOR	P1P2	0.972208	-0.0613587	-0.00075109	10	P1P2	0.819377	-0.00630915	10	P1P2	0.839658	0.0875575	10
BCORL1	P1P2	0.689383	0.0100851	0.00162914	10	P1P2	0.799562	0.00223957	10	P1P2	0.644015	0.0779366	10
BCR	P1P2	0.979538	0.0194127	0.0001743	10	P1P2	0.0177168	0.0295984	10	P1P2	0.466499	0.214768	10
BCS1L	P1P2	0.211272	0.139748	0.0943522	10	P1P2	0.0462977	-0.102529	10	P1P2	0.717934	0.108706	10
BDH1	P1	0.381981	-0.12018	-0.0502303	10	P2	0.0642107	0.0432991	9	P1	0.441557	-0.260881	10
BDH2	P1P2	0.971144	0.0176555	0.000224516	10	P1P2	0.893511	-0.00614136	10	P1P2	0.933458	0.141564	10
BDKRB1	P1P2	0.0113742	-0.364297	-0.708222	10	P1P2	0.899207	-0.01206	10	P1P2	0.0103505	-0.760318	10
BDKRB2	P1P2	0.330633	-0.0818321	-0.0393329	10	P1P2	0.908169	-0.0319072	10	P1P2	0.217142	-0.209926	10
BDNF	P1P2	0.075989	0.227546	0.254681	10	P1P2	0.412926	-0.0578467	10	P1P2	0.252729	0.255668	10
BDP1	P1P2	0.0795223	0.218738	0.240505	9	P1P2	0.690908	-0.0870146	10	P1P2	0.294354	0.21902	10
BEAN1	P1P2	0.109533	-0.212284	-0.203889	9	P1P2	0.798976	0.0169163	9	P1P2	0.089205	-0.368902	9
BECN1	P1P2	0.452531	-0.146565	-0.0504697	10	P1P2	0.0632216	0.0319082	10	P1P2	0.904705	-0.0148899	10
BEGAIN	P1	0.41629	0.05476	0.0208419	10	P2	0.15195	-0.0426068	10	P1	0.510479	0.0919998	10
BEND2	P1P2	0.972799	-0.0370584	-0.000443849	10	P1P2	0.739713	0.00718034	10	P1P2	0.999413	-0.224094	10
BEND3	P1P2	0.250937	-0.0979121	-0.0587899	10	P1P2	0.353213	-0.0137848	10	P1P2	0.163159	-0.395701	10
BEND4	P1P2	0.287664	-0.0884647	-0.0478695	8	P1P2	0.845055	-0.0168348	10	P1P2	0.330516	-0.324912	10
BEND5	P1P2	0.860304	-0.0625867	-0.00408992	9	P1P2	0.935181	-0.0131473	9	P1P2	0.939487	-0.146368	9
BEND6	P1P2	0.203234	-0.263418	-0.182286	9	P1P2	0.813849	-0.00290567	9	P1P2	0.199624	-0.223572	9
BEND7	P1P2	0.877465	-0.103383	-0.00586908	10	P1P2	0.206287	-0.0413444	10	P1P2	0.553079	-0.229667	10
BEST1	P1	0.248661	0.170717	0.10318	9	P2	0.840227	-0.0274194	10	P1	0.283111	0.381437	10
BEST2	P1P2	0.97008	-0.0770829	-0.00101692	10	P1P2	0.519547	-0.0660118	10	P1P2	0.619921	-0.340961	10
BEST3	P1P2	0.0755318	-0.255977	-0.287173	9	P1P2	0.181073	0.0130629	10	P1P2	0.19865	-0.408711	10
BEST4	P1P2	0.483153	-0.165052	-0.0521423	10	P1P2	0.21469	0.0118524	10	P1P2	0.777945	-0.106099	10
BET1	P1P2	0.0703373	0.262873	0.303044	10	P1P2	0.64304	0.00171579	10	P1P2	0.0348796	0.473929	10
BET1L	P1P2	0.104531	0.120463	0.118144	9	P1P2	0.554621	-0.0186188	10	P1P2	0.205155	0.0879797	10
BEX1	P1P2	0.233335	-0.178957	-0.113104	10	P1P2	0.435153	0.00965675	10	P1P2	0.312619	-0.24778	10
BEX2	P1P2	0.0627821	0.205119	0.246587	10	P1P2	0.648948	-0.0296028	10	P1P2	0.130712	0.310512	10
BEX4	P1P2	0.941381	0.00292567	7.67533e-05	10	P1P2	0.424167	-0.035704	10	P1P2	0.632443	-0.136329	10
BEX5	P1P2	0.318762	0.111633	0.0554295	10	P1P2	0.663175	0.00470701	10	P1P2	0.331175	0.301152	10
BFAR	P1P2	0.228602	-0.0835394	-0.0535421	10	P1P2	0.178688	-0.0331516	10	P1P2	0.180328	-0.711186	10
BFSP1	P1	0.0587465	0.220405	0.271323	10	P2	0.18213	-0.0495492	10	P1	0.0703739	0.213527	10
BFSP2	P1P2	0.271055	0.109348	0.0619942	10	P1P2	0.914344	0.00449181	10	P1P2	0.269982	0.29621	10
BGLAP	P1P2	0.629001	-0.0663014	-0.0133497	8	P1P2	1.01081e-05	-0.313659	10	P1P2	0.00278656	-1.03195	10
BGN	P1P2	0.547728	0.167027	0.0436668	10	P1P2	0.52394	0.027488	10	P1P2	0.342883	0.322227	10
BHLHA15	P1P2	0.18061	0.119496	0.0888161	10	P1P2	0.0502828	-0.0487182	10	P1P2	0.316018	0.133831	10
BHLHA9	P1P2	0.907587	-0.020135	-0.000847917	10	P1P2	0.179687	-0.0466963	10	P1P2	0.602985	-0.105805	10
BHLHB9	P1P2	0.241636	0.146374	0.0902891	10	P1P2	0.45601	-0.0327813	10	P1P2	0.310366	0.0993425	10
BHLHE22	P1P2	0.847054	-0.0382993	-0.00276095	10	P1P2	0.271908	0.0220669	10	P1P2	0.520846	-0.0525973	10
BHLHE23	P1P2	0.0237042	0.302681	0.49191	9	P1P2	0.25339	0.0187063	9	P1P2	0.00925879	0.652831	9
BHLHE40	P1P2	5.2433e-05	0.34506	1.47699	10	P1P2	0.886543	0.00835709	10	P1P2	3.1802e-05	0.68928	10
BHLHE41	P1P2	0.530488	-0.105777	-0.029123	10	P1P2	0.743266	-0.0123749	10	P1P2	0.60792	-0.212506	10
BHMT	P1P2	0.792663	-0.00828374	-0.000835922	10	P1P2	0.355428	0.0227224	10	P1P2	0.906922	-0.00325626	10
BHMT2	P1P2	0.500619	0.0666471	0.020027	10	P1P2	0.37448	-0.0592796	10	P1P2	0.852225	-0.13758	10
BICC1	P1P2	0.714668	0.139575	0.0203633	10	P1P2	0.155725	0.0287728	10	P1P2	0.421298	0.30784	10
BICD1	P1P2	0.203262	0.166308	0.115076	10	P1P2	0.761783	-0.0195571	10	P1P2	0.211814	0.300506	10
BICD2	P1P2	0.453603	-0.0709119	-0.0243458	10	P1P2	0.096473	-0.0495098	10	P1P2	0.234747	-0.254003	10
BID	P1P2	0.429329	0.10037	0.0368569	10	P1P2	0.532589	-0.00851041	10	P1P2	0.372822	0.215862	10
BIK	P1P2	0.180369	0.141108	0.104961	10	P1P2	0.328054	-0.000279089	10	P1P2	0.0795348	0.264947	10
BIN1	P1P2	0.897021	0.0418277	0.00197416	10	P1P2	0.619004	0.0372697	9	P1P2	0.795388	0.0865084	10
BIN2	P1P2	0.176115	0.196134	0.147925	10	P1P2	0.129113	0.00785429	10	P1P2	0.0613381	0.402897	10
BIN3	P1P2	0.917934	-0.0514463	-0.00191321	10	P1P2	0.654136	-0.0158905	10	P1P2	0.96582	0.0295295	10
BIRC2	P1P2	0.692991	-0.0953662	-0.0151892	10	P1P2	0.494339	-0.0144984	10	P1P2	0.586565	-0.184119	10
BIRC3	P1P2	0.189855	0.152706	0.110189	10	P1P2	0.211934	-0.0796348	10	P1P2	0.631291	0.108791	10
BIRC5	P1P2	0.854673	-0.00565367	-0.00038558	5	P1P2	1.26695e-07	-0.318178	10	P1P2	5.88811e-06	-0.888629	10
BIRC6	P1P2	0.166556	0.192264	0.149666	10	P1P2	0.00239078	0.0973071	10	P1P2	0.0134468	0.680674	10
BIRC7	P1P2	0.558342	0.152476	0.0385917	10	P1P2	0.979602	-0.0034783	10	P1P2	0.525446	0.180641	10
BIRC8	P1P2	0.629825	-0.030567	-0.00613725	10	P1P2	0.915976	-0.0252611	10	P1P2	0.755124	-0.139082	10
BIVM	P2	0.00505549	0.449537	1.03224	10	P2	0.0709788	-0.0756351	10	P2	0.00624905	0.69071	10
BIVM-ERCC5	ENST00000602836.1	0.196039	-0.144931	-0.102561	10	ENST00000602836.1	0.433943	0.0160635	10	ENST00000602836.1	0.384142	-0.273265	10
BLCAP	P1P2	0.825287	-0.0398904	-0.00332665	10	P1P2	0.0210807	0.0401595	10	P1P2	0.659081	0.111446	10
BLID	ENST00000560104.1	0.49876	-0.0879147	-0.0265597	9	ENST00000560104.1	0.950439	-0.0149969	10	ENST00000560104.1	0.436332	-0.124581	10
BLK	P1P2	0.440052	0.0737352	0.0262863	10	P1P2	0.137353	-0.0471989	10	P1P2	0.870392	-0.0579668	10
BLM	P1P2	0.383227	-0.0961445	-0.0400484	9	P1P2	0.00350345	-0.0795803	10	P1P2	0.0527607	-0.696801	10
BLMH	P1P2	0.0387246	0.361931	0.511051	10	P1P2	0.974914	0.0113506	10	P1P2	0.0151587	0.701789	10
BLNK	P1P2	0.757207	0.0601551	0.00726584	9	P1P2	6.65513e-07	-0.181021	10	P1P2	0.0556703	-0.50657	10
BLOC1S1	P1P2	0.900776	0.0213851	0.000970526	10	P1P2	0.271716	-0.0354173	10	P1P2	0.58971	-0.115712	10
BLOC1S2	P1P2	0.268418	0.0985185	0.0562727	10	P1P2	0.136577	-0.0754714	10	P1P2	0.664312	0.124723	10
BLOC1S3	P2	0.0871367	-0.23035	-0.244125	10	P1	0.00386945	0.0634391	9	P1	0.0533395	0.429468	10
BLOC1S4	P1P2	0.327644	0.185992	0.0901311	9	P1P2	0.00895442	-0.111936	10	P1P2	0.837586	0.0250449	10
BLOC1S5	P1P2	0.723539	0.0816485	0.0114747	10	P1P2	0.974094	-0.0150018	10	P1P2	0.776816	0.123416	10
BLOC1S6	P1P2	0.937961	0.0475599	0.00132289	10	P1P2	0.0622258	0.0471211	10	P1P2	0.658868	0.150001	10
BLVRA	P2	0.924914	-0.0632814	-0.00214515	9	P1	0.321341	0.000920446	10	P2	0.64201	-0.0914368	10
BLVRB	P1P2	0.442074	-0.106699	-0.0378252	10	P1P2	0.802628	-0.00180559	10	P1P2	0.33633	-0.160649	10
BLZF1	P1P2	0.384407	0.0519946	0.0215886	10	P1P2	0.786196	-0.0155524	10	P1P2	0.321306	0.0751572	10
BMF	P1P2	0.848913	-0.068878	-0.00489978	10	P1P2	0.919125	-0.00394416	10	P1P2	0.837931	-0.16636	10
BMI1	P1P2	0.271249	-0.164693	-0.0933203	10	P1P2	0.329656	0.0225133	10	P1P2	0.391587	-0.249049	10
BMP1	P1P2	0.18182	0.163789	0.121263	10	P1P2	0.834487	-0.0217528	10	P1P2	0.317014	0.216561	10
BMP10	P1P2	0.242812	-0.142341	-0.0875014	9	P1P2	0.768506	-0.0239962	9	P1P2	0.200442	-0.236085	9
BMP15	ENST00000252677.3	0.438999	0.0870591	0.0311268	10	ENST00000252677.3	0.569486	-0.0435971	10	ENST00000252677.3	0.686917	0.0800687	10
BMP2	P1	0.188856	0.00710381	0.00514224	10	P1	0.415193	-0.0164061	10	P1	0.383579	0.0807366	10
BMP2K	P1P2	0.177826	0.217998	0.163499	10	P1P2	0.530275	-0.0528525	10	P1P2	0.284566	0.108562	10
BMP3	P1P2	0.713562	-0.0255112	-0.00373913	10	P1P2	0.224289	-0.0610949	10	P1P2	0.403913	-0.304267	10
BMP4	P2	0.358009	-0.186686	-0.0832817	9	P1	0.531239	-0.0241546	10	P2	0.17648	-0.511078	10
BMP5	P1P2	0.681646	-0.123093	-0.0204877	10	P1P2	0.134728	0.0392753	10	P1P2	0.939783	-0.052936	10
BMP6	P1P2	0.765371	-0.0667901	-0.00775619	10	P1P2	0.976789	0.00132077	10	P1P2	0.763082	-0.240831	10
BMP7	P1P2	0.847519	-0.119283	-0.00857057	10	P1P2	0.0848031	0.0308234	10	P1P2	0.719585	-0.0219879	10
BMP8A	P1P2	0.472715	0.0998422	0.0324887	8	P1P2	0.947631	-0.0576145	9	P1P2	0.67272	0.00449792	9
BMP8B	P1P2	0.909039	-0.00316615	-0.000131134	9	P1P2	0.661885	0.0235923	9	P1P2	0.70173	0.0753713	9
BMPER	P1P2	0.20772	0.0668422	0.0456213	10	P1P2	0.280058	0.0264425	9	P1P2	0.087575	0.311883	10
BMPR1A	P1P2	0.042822	0.180095	0.246429	10	P1P2	0.0245822	0.0583854	10	P1P2	0.0089037	0.527445	10
BMPR1B	P1P2	0.719432	-0.0451087	-0.00645102	10	P1P2	0.184306	-0.0270982	10	P1P2	0.521611	-0.138036	10
BMPR2	P1P2	0.161259	0.198864	0.157594	10	P1P2	0.0767917	0.053294	10	P1P2	0.0397962	0.672225	10
BMS1	P1P2	0.580876	-0.0577461	-0.0136233	8	P1P2	0.000493755	-0.207836	10	P1P2	0.0174042	-0.726357	10
BMX	P1P2	0.616824	0.0443947	0.00931571	10	P1P2	0.868701	-0.0184844	10	P1P2	0.541414	0.00631969	10
BNC1	P1P2	0.0825811	0.243785	0.264048	10	P1P2	0.164331	0.0338399	10	P1P2	0.0381779	0.581667	10
BNC2	P1P2	0.439964	-0.105488	-0.0376152	10	P1P2	0.693076	-0.0306778	10	P1P2	0.327815	-0.256606	10
BNIP1	P1P2	0.163981	0.174139	0.136735	10	P1P2	0.331481	-0.0836716	10	P1P2	0.520942	0.167427	10
BNIP2	P1P2	0.795178	-0.0749556	-0.00746074	10	P1P2	0.831162	0.000368401	10	P1P2	0.773884	-0.0492302	10
BNIP3	P1P2	0.0704293	-0.304143	-0.350448	10	P1P2	0.194715	0.0341124	10	P1P2	0.113049	-0.317165	10
BNIP3L	P1P2	0.469751	-0.124525	-0.0408606	10	P1P2	0.952077	-0.0166599	10	P1P2	0.387449	-0.210819	10
BNIPL	P1P2	0.948698	0.0158456	0.000362422	10	P1P2	0.33324	0.0356818	10	P1P2	0.613391	0.160907	10
BOC	P1P2	0.275096	-0.177926	-0.0997306	9	P1P2	0.388305	0.027455	9	P1P2	0.427425	-0.220152	9
BOD1	P1P2	0.00945821	-0.329623	-0.66722	10	P1P2	0.414521	0.0424492	10	P1P2	0.0132323	-0.555409	10
BOD1L1	P1	0.391825	0.0756646	0.0307886	10	P2	0.721262	0.00386397	10	P1	0.319012	0.156077	10
BOD1L2	P1P2	0.316679	-0.170037	-0.0849133	10	P1P2	0.203976	-0.0346122	10	P1P2	0.191244	-0.371853	10
BOK	P1P2	0.351023	0.0575308	0.0261572	9	P1P2	0.347528	-0.08202	10	P1P2	0.65695	-0.190833	10
BOLA1	P2	0.175075	-0.131933	-0.0998438	10	P1	0.648631	-0.0101725	10	P2	0.170984	-0.375544	10
BOLA2	ENST00000330978.3	0.598988	-0.0310056	-0.00690127	10	ENST00000330978.3	0.96847	-0.0105557	10	ENST00000330978.3	0.623145	-0.0161343	10
BOLA2B	ENST00000305321.4	0.194097	0.0986	0.0702013	10	ENST00000305321.4	0.904443	-0.0105557	10	ENST00000305321.4	0.186388	0.250548	10
BOLA3	P1P2	0.591183	-0.111204	-0.0253854	10	P1P2	0.735168	-0.0396366	10	P1P2	0.46704	-0.321695	10
BOLL	P1P2	0.980248	0.015938	0.00013809	10	P1P2	0.671942	-0.0271028	10	P1P2	0.859853	-0.120322	10
BOP1	P2	0.349464	0.00622103	0.00284051	10	P1	0.000166305	-0.287187	10	P1	0.0224346	-0.894071	10
BORA	P1P2	0.401301	0.0593494	0.0235338	9	P1P2	3.19201e-05	-0.191151	10	P1P2	0.125688	-0.513385	10
BPGM	P1P2	0.643853	0.040054	0.00765885	9	P1P2	0.381715	-0.0457053	10	P1P2	0.892351	-0.0861428	10
BPHL	P1P2	0.86171	-0.066995	-0.00433049	10	P1P2	0.657108	-0.0275334	10	P1P2	0.829197	-0.205195	10
BPI	P1P2	0.0810201	-0.328618	-0.358655	10	P1P2	0.271075	0.00326527	10	P1P2	0.150485	-0.481644	10
BPIFA1	P1	0.527868	0.151287	0.0419784	10	P2	0.508179	-0.0535605	10	P1	0.526119	0.278983	10
BPIFA2	P1P2	0.847635	0.0313349	0.00224957	10	P1P2	0.166167	-0.0654581	10	P1P2	0.86622	-0.224243	10
BPIFA3	P1P2	0.854492	-0.0813684	-0.0055568	10	P1P2	0.947747	-0.00794731	10	P1P2	0.858696	-0.174438	10
BPIFB1	P1P2	0.658744	-0.0916512	-0.0166148	10	P1P2	0.190153	-0.042973	10	P1P2	0.355006	-0.205643	10
BPIFB2	P1P2	0.642623	0.0391396	0.0075165	10	P1P2	0.977013	0.00130912	9	P1P2	0.641061	0.0169753	10
BPIFB3	ENST00000375494.3	0.594053	-0.0236148	-0.00534107	10	ENST00000375494.3	0.873908	-0.0126149	10	ENST00000375494.3	0.601754	-0.142317	10
BPIFB4	P1P2	0.931123	-0.0350962	-0.00108773	10	P1P2	0.407996	-0.022914	10	P1P2	0.81202	-0.0966791	10
BPIFB6	P1P2	0.592822	-0.0554492	-0.0125912	10	P1P2	0.451671	-0.0350774	10	P1P2	0.395916	-0.282604	10
BPIFC	P1P2	0.672968	-0.122046	-0.0209926	10	P1P2	0.237499	0.0278173	10	P1P2	0.985549	-0.122464	10
BPNT1	P1P2	0.38182	-0.199497	-0.0834179	10	P1P2	0.346097	-0.0236529	10	P1P2	0.212083	-0.425762	10
BPTF	P1P2	0.174651	0.149794	0.113518	10	P1P2	0.0269529	-0.07092	10	P1P2	0.525926	-0.0223148	10
BPY2	ENST00000331070.3,ENST00000382585.1	0.358393	0.0534664	0.0238268	10	ENST00000331070.3,ENST00000382585.1	0.700575	0.000549812	10	ENST00000331070.3,ENST00000382585.1	0.293135	0.112373	10
BPY2B	ENST00000382392.1	0.358393	0.0534664	0.0238268	10	ENST00000382392.1	0.700575	0.000549812	10	ENST00000382392.1	0.293135	0.112373	10
BPY2C	ENST00000382287.1	0.358393	0.0534664	0.0238268	10	ENST00000382287.1	0.700575	0.000549812	10	ENST00000382287.1	0.293135	0.112373	10
BRAF	P1P2	0.088513	-0.21486	-0.226246	9	P1P2	0.173256	0.0355796	9	P1P2	0.192218	-0.349418	9
BRAP	P1P2	0.689056	0.0184565	0.00298525	10	P1P2	0.751168	0.00797981	10	P1P2	0.693971	0.113996	10
BRAT1	P1P2	0.461682	0.0909247	0.0305195	10	P1P2	0.183578	0.0259117	10	P1P2	0.314882	0.394507	10
BRCA1	P1P2	0.205058	-0.28496	-0.196087	10	P1P2	0.0139529	-0.107227	10	P1P2	0.0152018	-0.847481	10
BRCA2	P1P2	0.0017814	-0.356929	-0.981282	10	P1P2	0.0313317	-0.105584	10	P1P2	9.9902e-05	-0.911759	10
BRCC3	P1P2	0.720763	0.0138883	0.00197502	10	P1P2	0.458501	-0.0220039	10	P1P2	0.805175	0.0351966	10
BRD1	P1P2	2.17923e-05	-0.518228	-2.41582	10	P1P2	0.0173262	0.0458726	10	P1P2	9.84567e-05	-0.894258	10
BRD2	P2	0.017846	0.326289	0.570502	10	P1	0.00139717	-0.243994	10	P1	0.00576898	-0.836916	10
BRD3	P1P2	0.746998	-0.0203478	-0.00257767	10	P1P2	0.402771	-0.041728	10	P1P2	0.554559	-0.0988294	10
BRD4	ENST00000263377.2,ENST00000371835.4	0.0571007	0.11035	0.137205	10	ENST00000263377.2,ENST00000371835.4	0.842985	-0.0145378	10	ENST00000263377.2,ENST00000371835.4	0.0744202	0.386919	10
BRD7	P1P2	0.0581149	0.179492	0.221801	10	P1P2	0.887239	-0.0418187	10	P1P2	0.0872478	0.384679	10
BRD8	P1P2	0.0524821	-0.197535	-0.252842	10	P1P2	0.179735	-0.0779246	10	P1P2	0.0317456	-0.866728	10
BRD9	P1P2	0.947635	0.0112973	0.00026389	10	P1P2	0.983001	-0.0463587	10	P1P2	0.773545	-0.355748	10
BRDT	P1P2	0.974454	0.071386	0.000802287	10	P1P2	0.681077	0.00824936	10	P1P2	0.851532	0.153268	10
BRE	P1P2	0.105462	0.136382	0.133232	10	P1P2	0.305612	0.00530308	10	P1P2	0.0743246	0.323621	10
BRF1	P1P2	0.139027	-0.119535	-0.10243	10	P1P2	0.00251117	-0.226193	10	P1P2	0.00201021	-1.03116	10
BRF2	P1P2	0.860661	0.000163973	1.06857e-05	10	P1P2	0.782244	-0.0264752	10	P1P2	0.925266	-0.0352253	10
BRI3	P1P2	0.253827	-0.247932	-0.147634	9	P1P2	0.466826	-0.0095392	10	P1P2	0.107728	-0.426867	10
BRI3BP	P1P2	0.598679	0.0293829	0.00654668	10	P1P2	0.351312	-0.0243258	10	P1P2	0.607817	-0.119099	10
BRICD5	P1P2	0.817091	-0.0781661	-0.00685746	8	P1P2	0.883851	0.0096451	8	P1P2	0.787352	0.0856517	8
BRINP1	P1P2	0.608085	-0.100468	-0.0217046	10	P1P2	0.528736	-0.00245788	10	P1P2	0.561288	-0.198487	10
BRINP2	P1P2	0.316035	-0.235287	-0.117706	10	P1P2	0.568688	0.0185736	10	P1P2	0.419599	-0.4459	10
BRINP3	P2	0.165646	-0.18518	-0.144592	9	P2	0.584437	-0.0282189	10	P2	0.151197	-0.382594	10
BRIP1	P1P2	0.895548	-0.13175	-0.00631229	9	P1P2	0.736165	0.000319986	10	P1P2	0.875032	-0.16334	10
BRIX1	P1P2	0.625142	-0.0524791	-0.0107069	9	P1P2	0.310003	-0.0625994	10	P1P2	0.248901	-0.372556	10
BRK1	P1P2	0.0444915	0.311964	0.421689	10	P1P2	0.321556	0.0234383	10	P1P2	0.0151341	0.816273	10
BRMS1	P1P2	0.909585	0.121293	0.00499204	10	P1P2	0.93547	-0.0213813	10	P1P2	0.843228	0.0506581	10
BRMS1L	P1P2	0.258168	0.147621	0.0868153	10	P1P2	0.822577	0.00262811	10	P1P2	0.326652	0.28376	10
BROX	P1P2	0.82598	-0.13555	-0.0112548	10	P1P2	0.740267	-0.0080061	10	P1P2	0.736729	-0.336378	10
BRPF1	P1P2	0.294022	0.0460907	0.0245028	10	P1P2	0.689068	-0.0102491	10	P1P2	0.379014	0.0471097	10
BRPF3	P1P2	0.024597	-0.427741	-0.688286	10	P1P2	0.9091	0.00846386	10	P1P2	0.0218005	-0.843791	10
BRS3	P1P2	0.0404608	0.385446	0.536913	10	P1P2	0.307906	-0.0463314	10	P1P2	0.0439748	0.605201	10
BRSK1	P1P2	0.0937948	0.338891	0.34832	10	P1P2	0.452024	-0.0373472	10	P1P2	0.138263	0.419418	10
BRSK2	P1P2	0.184013	0.0283676	0.0208545	10	P1P2	0.576186	-0.00884093	10	P1P2	0.319871	0.0975815	10
BRWD1	P1P2	0.701875	0.0132777	0.00204132	10	P1P2	0.432563	-0.0243851	10	P1P2	0.820025	-0.0389414	10
BRWD3	P1P2	0.151175	-0.203191	-0.166722	10	P1P2	0.0153035	0.0830424	10	P1P2	0.465058	-0.134837	10
BSCL2	P2	0.869056	-0.0873649	-0.0053251	10	P2	0.211397	-0.0370964	10	P1	0.504348	-0.114386	10
BSDC1	P1P2	0.879803	-0.0188649	-0.00104916	10	P1P2	0.0779749	-0.048348	10	P1P2	0.676978	-0.0502215	10
BSG	P1P2	0.775801	-0.0499946	-0.00551189	10	P1P2	0.414773	0.0180575	10	P1P2	0.980968	-0.0722856	10
BSN	P1P2	0.966889	0.0342381	0.000500685	10	P1P2	0.101125	-0.0448168	10	P1P2	0.567358	-0.0636071	10
BSND	P1P2	0.675025	0.00739466	0.00126212	10	P1P2	0.0422082	0.0398016	10	P1P2	0.397803	0.103712	10
BSPH1	P1P2	0.0771056	0.113416	0.126222	8	P1P2	0.9257	-0.0737761	9	P1P2	0.174836	0.12293	9
BSPRY	P1P2	0.653923	-0.0530497	-0.00978626	10	P1P2	0.427754	0.0088477	10	P1P2	0.779414	-0.05898	10
BST1	P1P2	0.327181	0.0962299	0.0466919	9	P1P2	0.0206419	-0.0920507	10	P1P2	0.965585	0.0476139	10
BST2	P1P2	0.268867	0.119222	0.0680115	10	P1P2	0.124292	-0.0496986	10	P1P2	0.444008	0.0105443	10
BSX	P1P2	0.278023	0.225529	0.125376	10	P1P2	0.990035	-0.00568211	10	P1P2	0.244516	0.352295	10
BTAF1	P1P2	0.130864	-0.217172	-0.191802	10	P1P2	0.533071	0.00894993	10	P1P2	0.205313	-0.513909	10
BTBD1	P1P2	0.701545	0.0949334	0.0146145	10	P1P2	0.320267	-0.00395637	10	P1P2	0.607406	0.17279	10
BTBD10	P2	0.29409	0.0970466	0.0515822	10	P2	0.144814	-0.0391604	10	P2	0.64222	0.0779281	10
BTBD11	P2	0.242651	0.101554	0.0624579	10	P1	0.158006	-0.0420132	10	P2	0.363962	0.177144	10
BTBD16	ENST00000260723.4,ENST00000368994.2	0.735908	-0.122358	-0.0162952	10	ENST00000260723.4,ENST00000368994.2	0.167882	0.046266	10	ENST00000260723.4,ENST00000368994.2	0.93018	-0.012065	10
BTBD17	P1P2	0.0178317	0.229219	0.400859	10	P1P2	0.925659	-0.00216552	10	P1P2	0.0216655	0.36863	10
BTBD18	ENST00000436147.3	0.568097	0.00954199	0.0023433	6	ENST00000422652.1	0.15883	0.0377257	10	ENST00000422652.1	0.45114	0.176763	10
BTBD19	P1P2	0.318006	0.0802075	0.0399084	9	P1P2	0.444487	-0.02276	9	P1P2	0.413813	0.135045	9
BTBD2	P1P2	0.246921	0.132606	0.0805505	10	P1P2	0.10254	0.0232653	10	P1P2	0.10205	0.332759	10
BTBD3	P1P2	0.717486	-0.100838	-0.0145396	9	P1P2	0.81892	-0.0291751	10	P1P2	0.699085	-0.121823	9
BTBD6	P1P2	0.963816	0.0223912	0.000358392	10	P1P2	0.152076	0.0470964	10	P1P2	0.543171	0.102027	10
BTBD7	P1P2	0.212194	0.181439	0.122157	10	P1P2	0.432477	-0.0560782	10	P1P2	0.305336	0.21107	10
BTBD8	P1P2	0.994559	-0.0648794	-0.000153736	10	P1P2	0.880975	0.0358995	10	P1P2	0.821514	0.0792817	10
BTBD9	P1P2	0.282646	-0.171704	-0.0942241	10	P1P2	0.890026	0.00518752	10	P1P2	0.315947	-0.193465	10
BTC	P1P2	0.887644	0.060708	0.00314231	10	P1P2	0.423145	0.00197043	10	P1P2	0.698871	0.296488	10
BTD	P1P2	0.37844	0.163899	0.0691659	10	P1P2	0.0750686	0.0353071	10	P1P2	0.176291	0.421733	10
BTF3	P1P2	0.119916	-0.217294	-0.200155	9	P1P2	0.135265	-0.0868021	10	P1P2	0.0127594	-0.732028	10
BTF3L4	P1P2	0.246618	0.0896281	0.0544916	10	P1P2	0.374797	-0.0276378	10	P1P2	0.396982	0.174196	10
BTG1	P1P2	0.908057	-0.00557149	-0.000233372	10	P1P2	0.705699	-0.00821444	10	P1P2	0.879443	-0.0238953	10
BTG2	P1P2	0.773428	-0.0380839	-0.00424941	9	P1P2	0.837009	-0.0189054	9	P1P2	0.7842	-0.115514	9
BTG3	P1P2	0.408597	-0.0203642	-0.00791567	10	P1P2	0.774018	0.00166678	10	P1P2	0.441907	-0.140855	10
BTG4	P1P2	0.477988	-0.0519746	-0.0166622	10	P1P2	0.0673371	0.0455571	10	P1P2	0.271456	0.190371	10
BTK	P1P2	0.714668	0.0615608	0.00898143	10	P1P2	7.03871e-07	-0.215401	10	P1P2	0.00594831	-0.790185	10
BTLA	P1P2	0.524481	0.168777	0.0473032	10	P1P2	0.550297	-0.0433491	10	P1P2	0.597352	0.207103	10
BTN1A1	ENST00000244513.6	0.814683	-0.0715123	-0.00636541	10	ENST00000244513.6	0.954886	-0.0935284	10	ENST00000244513.6	0.447397	-0.163871	9
BTN2A1	P1P2	0.560038	0.0759171	0.0191146	10	P1P2	0.317129	0.0287997	10	P1P2	0.295304	0.267279	10
BTN2A2	P1P2	0.821322	-0.0383464	-0.00327811	9	P1P2	0.0412788	-0.0787343	10	P1P2	0.443047	-0.301565	9
BTN3A1	P1P2	0.655314	-0.00846682	-0.00155409	10	P1P2	0.0376649	-0.0323624	10	P1P2	0.948104	-0.101242	10
BTN3A2	P1P2	0.271401	-0.100095	-0.0566924	9	P1P2	0.039486	-0.0671184	10	P1P2	0.0603046	-0.469736	10
BTN3A3	P1P2	0.189055	0.180234	0.130384	10	P1P2	0.115922	-0.0496054	10	P1P2	0.410161	0.263654	10
BTNL2	P1P2	0.720985	-0.0156168	-0.00221874	10	P1P2	0.965893	-0.00395637	10	P1P2	0.664526	0.0588142	10
BTNL3	P1P2	0.441634	-0.233338	-0.0828204	10	P1P2	0.51451	0.0220124	10	P1P2	0.647715	-0.289969	10
BTNL8	P1P2	0.302701	0.0696728	0.0361592	10	P1P2	0.975149	-0.0253083	10	P1P2	0.400356	0.114906	10
BTNL9	P1	0.054259	0.18451	0.233503	9	P1	0.0224903	-0.043676	9	P1	0.152999	0.304135	9
BTRC	P1P2	0.210407	0.107349	0.0726689	10	P1P2	0.525568	-0.010257	10	P1P2	0.222009	0.178008	10
BUB1	P1P2	0.636793	-0.061922	-0.0121368	10	P1P2	0.0322203	-0.0711369	10	P1P2	0.208492	-0.365594	10
BUB1B	P1P2	0.0565223	-0.229217	-0.286012	10	P1P2	0.184889	-0.0390618	10	P1P2	0.0113672	-0.643868	10
BUB3	P1P2	0.0177634	-0.299238	-0.523809	9	P1P2	0.0161796	-0.166901	10	P1P2	0.00102565	-0.86582	10
BUD13	P1P2	0.533685	-0.09938	-0.0271025	7	P1P2	0.024498	-0.214185	10	P1P2	0.0184892	-0.726935	10
BUD31	P1P2	0.947163	0.0122983	0.000289934	10	P1P2	0.347226	-0.0631447	10	P1P2	0.504724	-0.195679	10
BVES	P1P2	0.797352	-0.0787266	-0.00774275	10	P1P2	0.492948	0.0302738	10	P1P2	0.977327	0.0314591	10
BYSL	P1P2	0.378921	-0.0479923	-0.0202264	10	P1P2	0.017745	-0.0873565	10	P1P2	0.13508	-0.554399	10
BZRAP1	P1P2	0.471301	-0.176604	-0.0576967	10	P1P2	0.607149	-0.0203041	10	P1P2	0.432092	-0.408349	10
BZW1	P1P2	0.744305	-0.130071	-0.0166815	10	P1P2	0.043935	0.0574912	10	P1P2	0.831379	-0.113026	10
BZW2	P1P2	0.816179	-0.0138943	-0.00122568	10	P1P2	0.736054	-0.0324784	10	P1P2	0.950098	-0.184073	10
C10orf10	P1P2	0.431409	-0.212325	-0.0775222	10	P1P2	0.848277	0.000468129	10	P1P2	0.387045	-0.366999	10
C10orf105	P1P2	0.526802	0.080113	0.0222996	10	P1P2	0.00748133	-0.0956763	10	P1P2	0.6814	-0.100425	10
C10orf107	P1P2	0.234652	0.111299	0.0700709	9	P1P2	0.477925	-0.0293407	9	P1P2	0.340098	0.243206	9
C10orf11	ENST00000372499.1	0.114904	-0.214219	-0.201294	10	ENST00000372499.1	0.832537	0.0100191	10	ENST00000372499.1	0.171306	-0.436284	10
C10orf111	P1P2	0.174886	-0.244728	-0.185319	10	P1P2	0.619117	-0.0321698	10	P1P2	0.249869	-0.444449	10
C10orf112	ENST00000454679.2	0.74947	0.0120874	0.0015139	10	ENST00000454679.2	0.493412	0.018773	10	ENST00000454679.2	0.840694	-0.0377626	10
C10orf113	ENST00000529198.1,ENST00000534331.1	0.78958	-0.10104	-0.0103671	10	ENST00000529198.1,ENST00000534331.1	0.478786	-0.0134119	10	ENST00000529198.1,ENST00000534331.1	0.99389	-0.163446	10
C10orf118	P2	0.594492	0.11755	0.0265492	9	P2	0.214611	0.0255641	9	P2	0.336261	0.273486	9
C10orf12	ENST00000286067.2	0.180987	-0.160399	-0.119073	9	ENST00000286067.2	0.820949	-0.0111578	9	ENST00000286067.2	0.211803	-0.239511	9
C10orf120	P1P2	0.100164	0.192221	0.192084	9	P1P2	0.914386	-0.00700986	9	P1P2	0.101816	0.388882	9
C10orf126	ENST00000375520.1	0.181723	0.310978	0.230307	10	ENST00000375520.1	0.874834	-0.0215833	10	ENST00000375520.1	0.119482	0.64531	10
C10orf128	P1P2	0.100824	0.245072	0.244198	10	P1P2	0.748383	0.0223534	10	P1P2	0.0489584	0.694721	9
C10orf129	P1P2	0.0665909	-0.215035	-0.253006	9	P1P2	0.939617	-0.000735734	9	P1P2	0.0944072	-0.462944	9
C10orf131	P1P2	0.790265	0.0315806	0.0032284	10	P1P2	0.626597	0.00804331	10	P1P2	0.642537	-0.122716	10
C10orf137	P1P2	0.630352	0.0586069	0.0117458	10	P1P2	0.040496	-0.0863185	10	P1P2	0.787107	-0.0821632	10
C10orf2	P1P2	0.692116	-0.236612	-0.0378156	10	P1P2	0.675268	-0.0468975	10	P1P2	0.297825	-0.444316	10
C10orf25	P1P2	0.730662	0.0454901	0.00619955	10	P1P2	0.196644	0.00303412	10	P1P2	0.58272	0.201359	10
C10orf32	P1P2	0.934231	0.0458854	0.00135573	9	P1P2	0.238552	-0.063119	10	P1P2	0.650257	0.0800075	10
C10orf35	P1P2	0.209747	0.139657	0.0947298	9	P1P2	0.195036	0.0161199	9	P1P2	0.156328	0.382806	9
C10orf53	P1P2	0.358471	0.241039	0.107394	10	P1P2	0.746157	-0.0222617	10	P1P2	0.384061	0.252215	10
C10orf54	P1P2	0.482598	-0.115478	-0.0365387	10	P1P2	0.704935	-0.00186498	10	P1P2	0.400191	-0.313154	10
C10orf55	P1P2	0.441019	-0.0508669	-0.0180854	10	P1P2	0.647575	-0.0222616	10	P1P2	0.348684	-0.132946	10
C10orf62	P1P2	0.873092	0.0269558	0.00158878	9	P1P2	0.916353	-0.00684847	9	P1P2	0.861293	0.0120808	8
C10orf67	P1P2	0.369067	-0.122946	-0.0532226	9	P1P2	0.417747	0.0355686	9	P1P2	0.583259	-0.139231	9
C10orf71	P1P2	0.314534	0.0446286	0.0224184	10	P1P2	0.420259	0.026407	10	P1P2	0.22279	0.347231	10
C10orf76	P1P2	0.126758	-0.221143	-0.198371	10	P1P2	0.596508	0.00822092	10	P1P2	0.155265	-0.398419	10
C10orf82	P1P2	0.713439	0.0764807	0.0112154	8	P1P2	0.892547	-0.0141703	9	P1P2	0.907433	0.206738	9
C10orf88	P1P2	0.849267	-0.0552425	-0.00391977	9	P1P2	0.154487	-0.0545508	10	P1P2	0.510006	-0.183519	10
C10orf90	ENST00000284694.7	0.309073	-0.165183	-0.0842332	10	ENST00000284694.7	0.641356	0.00742859	10	ENST00000284694.7	0.353782	-0.23023	10
C10orf91	P1P2	0.0274869	0.194937	0.304272	10	P1P2	0.028748	-0.0647131	10	P1P2	0.155607	0.305344	10
C10orf95	P1P2	0.57002	-0.0804951	-0.0196497	8	P1P2	0.20555	-0.0683593	10	P1P2	0.196907	-0.44988	10
C10orf99	P1P2	0.486954	-0.00837946	-0.00261868	10	P1P2	0.965776	-0.0221083	10	P1P2	0.570655	-0.0621751	10
C11orf1	P1P2	0.374041	-0.107137	-0.0457562	10	P1P2	0.877846	0.0166659	10	P1P2	0.459677	-0.246884	10
C11orf16	P1P2	0.196141	-0.310579	-0.219713	10	P1P2	0.115718	0.051056	10	P1P2	0.63387	-0.216992	9
C11orf21	P1P2	0.613593	0.0428069	0.00908019	10	P1P2	0.306375	0.0182214	10	P1P2	0.428219	0.242862	10
C11orf24	P1P2	0.389778	-0.0127726	-0.00522632	10	P1P2	0.0341991	0.0342223	10	P1P2	0.128921	0.119024	10
C11orf30	P1P2	0.401476	-0.130657	-0.0517848	9	P1P2	0.257929	-0.0508446	10	P1P2	0.184287	-0.482266	10
C11orf31	P1P2	0.0649489	0.134987	0.160288	10	P1P2	0.318767	-0.0579214	10	P1P2	0.177424	0.170969	10
C11orf34	P1P2	0.287518	-0.211082	-0.114266	9	P1P2	0.107131	0.0408425	9	P1P2	0.503432	-0.146369	9
C11orf35	P1P2	0.510666	0.0688177	0.0200854	10	P1P2	0.350856	-0.0145529	10	P1P2	0.689518	0.012379	10
C11orf40	ENST00000307616.1	0.0829309	-0.379247	-0.410074	9	ENST00000307616.1	0.0453615	0.0267009	9	ENST00000307616.1	0.185892	-0.444488	9
C11orf42	P1P2	0.795407	-0.0774287	-0.00769723	10	P1P2	0.683125	0.0276104	10	P1P2	0.613391	-0.189117	10
C11orf44	ENST00000317019.2	0.580285	0.0658479	0.0155637	9	ENST00000317019.2	0.218131	-0.0405983	10	ENST00000317019.2	0.994478	-0.049034	10
C11orf45	P1	0.168237	0.124912	0.0966917	9	P2	0.595396	-0.0589267	9	P1	0.174097	0.244686	9
C11orf48	P2	0.178448	-0.219441	-0.164249	10	P1	0.196797	-0.0875022	10	P2	0.0877389	-0.512999	10
C11orf49	P1P2	0.816963	-0.0374191	-0.00328531	8	P1P2	0.373904	-0.0243018	9	P1P2	0.6843	-0.213669	8
C11orf52	P2	0.171445	-0.0999268	-0.0765313	9	P1	0.433943	0.0235857	10	P2	0.139097	-0.423756	9
C11orf53	P1P2	0.251366	0.0716219	0.0429513	10	P1P2	0.568887	-0.00398143	10	P1P2	0.342659	0.160839	10
C11orf54	P1P2	0.61224	0.00436305	0.000929672	10	P1P2	0.349114	0.0185793	10	P1P2	0.412341	0.0323279	10
C11orf57	P1P2	0.147642	-0.184206	-0.153037	8	P1P2	0.807746	-0.0833126	10	P1P2	0.117709	-0.543814	10
C11orf58	P1P2	0.0412773	-0.283089	-0.391876	9	P1P2	0.23861	-0.103192	10	P1P2	0.00627705	-0.655142	10
C11orf63	P1P2	0.843759	0.0365744	0.00269851	9	P1P2	0.154913	-0.0676919	10	P1P2	0.81065	-0.0546073	10
C11orf65	P1P2	0.271333	0.168112	0.095235	9	P1P2	0.774549	0.0100097	9	P1P2	0.176967	0.29239	9
C11orf68	P1P2	0.533908	0.0840705	0.022912	9	P1P2	0.98727	-0.0187356	9	P1P2	0.605725	0.191138	9
C11orf70	P1P2	0.13026	-0.133011	-0.11774	10	P1P2	0.0302281	-0.0559041	10	P1P2	0.0353775	-0.745153	10
C11orf71	P1P2	0.811232	-0.022413	-0.00203633	10	P1P2	0.713575	-0.0019676	10	P1P2	0.741175	-0.136675	10
C11orf73	P1P2	0.497231	-0.0458854	-0.0139236	10	P1P2	0.00706272	-0.104923	10	P1P2	0.179324	-0.475086	10
C11orf74	P1P2	0.4606	-0.105232	-0.0354289	10	P1P2	0.00596213	0.0552789	10	P1P2	0.879559	-0.0844691	10
C11orf80	P1P2	0.0289812	-0.203919	-0.313604	9	P1P2	0.554428	-0.0323459	9	P1P2	0.0254248	-0.494145	9
C11orf82	P1P2	0.0545361	-0.179449	-0.226701	10	P1P2	0.143925	-0.042106	10	P1P2	0.0330077	-0.528738	10
C11orf83	P1P2	0.280857	-0.242072	-0.133506	10	P1P2	0.870089	-0.0144423	10	P1P2	0.289365	-0.486979	10
C11orf84	P1P2	0.00429909	-0.35297	-0.835347	9	P1P2	0.00210414	0.082312	9	P1P2	0.0610316	-0.498054	8
C11orf85	P1P2	0.705065	0.0458156	0.00695346	10	P1P2	0.00736737	0.0290289	10	P1P2	0.945291	0.222429	10
C11orf86	P1P2	0.0167062	-0.287131	-0.510268	10	P1P2	0.219562	0.0183735	10	P1P2	0.0433604	-0.50584	10
C11orf87	P1P2	0.141661	0.170442	0.144663	9	P1P2	0.264699	0.0231407	9	P1P2	0.0739863	0.443328	9
C11orf88	P1P2	0.668813	0.0855136	0.0149388	9	P1P2	0.431874	-0.0409838	10	P1P2	0.889558	0.146812	10
C11orf91	P1P2	0.66401	0.0461106	0.00819963	10	P1P2	0.980423	-0.0137171	10	P1P2	0.492482	0.116009	10
C11orf94	P1P2	0.361392	0.113264	0.0500651	8	P1P2	0.193202	-0.0785804	10	P1P2	0.90039	0.0303811	10
C11orf95	P1P2	0.665949	0.0077735	0.00137248	10	P1P2	0.720382	0.00701963	10	P1P2	0.62669	0.0440292	10
C11orf96	P1P2	0.0669558	0.203794	0.239298	10	P1P2	0.635582	-0.00794423	10	P1P2	0.0491591	0.165608	10
C12orf10	P1P2	0.254543	0.114118	0.0678133	9	P1P2	0.47342	-0.0446475	10	P1P2	0.52535	0.139054	10
C12orf23	P1P2	0.420724	0.0912362	0.034305	10	P1P2	0.004874	-0.0925036	10	P1P2	0.695386	0.0483506	10
C12orf29	P1P2	0.716201	-0.055162	-0.00799655	9	P1P2	0.60756	-0.00311665	10	P1P2	0.896544	0.0382857	10
C12orf39	P2	0.292184	-0.210155	-0.112295	10	P1	0.811505	0.0140273	10	P1	0.178115	0.208217	9
C12orf4	P1P2	0.944567	0.0313282	0.000775913	10	P1P2	0.426385	-0.0255885	10	P1P2	0.709804	-0.128503	10
C12orf40	P1P2	0.671346	0.0116895	0.00202291	10	P1P2	0.936639	-0.0155289	10	P1P2	0.631081	0.10777	10
C12orf42	ENST00000378113.2,ENST00000548883.1	0.11483	0.158844	0.149305	9	ENST00000378113.2,ENST00000548883.1	0.0291148	-0.0881164	10	ENST00000378113.2,ENST00000548883.1	0.481502	0.00557879	10
C12orf43	P1P2	0.135615	-0.215115	-0.186653	10	P1P2	0.258981	0.0160179	10	P1P2	0.238891	-0.424017	10
C12orf44	P1P2	0.552874	-0.101606	-0.0261507	10	P1P2	0.305057	0.03243	10	P1P2	0.913226	-0.0165148	10
C12orf45	P1P2	0.109239	-0.156817	-0.150799	7	P1P2	0.00146034	-0.177961	10	P1P2	0.00472181	-0.658348	10
C12orf49	P1P2	0.803768	0.146047	0.0138553	10	P1P2	0.89293	-0.0228335	10	P1P2	0.608438	0.17085	9
C12orf5	P1P2	0.372132	0.060812	0.0261068	10	P1P2	0.206974	-0.0421372	10	P1P2	0.654716	0.0684793	10
C12orf50	P1P2	0.0143607	-0.345096	-0.635952	10	P1P2	0.307488	0.0177594	10	P1P2	0.021034	-0.618443	10
C12orf52	P1P2	0.917699	-0.0189003	-0.000704976	10	P1P2	0.448849	-0.00387284	10	P1P2	0.923277	-0.106042	10
C12orf54	P1P2	0.919577	-0.011193	-0.000407555	9	P1P2	0.476677	0.0141419	9	P1P2	0.710729	0.0278443	9
C12orf55	P1P2	0.103751	-0.23431	-0.230564	10	P1P2	0.79072	0.0271263	10	P1P2	0.156036	-0.456156	10
C12orf56	P1P2	0.575371	-0.0746095	-0.0179101	9	P1P2	0.297374	0.0296532	9	P1P2	0.933561	-0.0298121	9
C12orf57	P1P2	0.610784	0.124668	0.026693	10	P1P2	0.000117127	-0.187331	10	P1P2	0.0515482	-0.553277	10
C12orf60	P1P2	0.682932	0.0145264	0.0024059	6	P1P2	0.000844755	-0.214958	9	P1P2	0.131148	-0.730406	9
C12orf61	P1P2	0.188542	0.159685	0.115706	9	P1P2	0.204322	0.0259296	9	P1P2	0.122726	0.458472	9
C12orf65	P1P2	0.796322	0.0754793	0.00746574	10	P1P2	0.137003	-0.0869213	10	P1P2	0.797889	-0.174041	10
C12orf66	P1P2	0.454228	0.0612206	0.0209819	10	P1P2	0.980891	0.0121141	10	P1P2	0.48813	0.154269	10
C12orf68	P1P2	0.0202916	-0.279491	-0.47309	10	P1P2	0.446126	0.000552162	10	P1P2	0.0286842	-0.528149	10
C12orf71	ENST00000429849.2	0.62636	-0.0947529	-0.0192515	9	ENST00000429849.2	0.217486	0.0256761	9	ENST00000429849.2	0.828064	-0.100377	9
C12orf73	P1	0.299366	-0.116394	-0.060967	9	P2	0.328418	-0.0204324	10	P1	0.269351	-0.34335	9
C12orf74	P1P2	0.403738	-0.124791	-0.0491553	10	P1P2	0.310774	0.024218	10	P1P2	0.596739	-0.224336	10
C12orf75	P1P2	0.064028	-0.337415	-0.402749	10	P1P2	0.920641	0.00212213	10	P1P2	0.0875204	-0.696939	10
C12orf76	P1P2	0.588012	-0.0629439	-0.0145157	10	P1P2	0.442625	0.00171247	10	P1P2	0.502442	-0.0973871	9
C12orf77	P1P2	0.155313	0.0593871	0.0480318	10	P1P2	0.858189	0.00575292	10	P1P2	0.108719	0.331814	9
C12orf79	P1P2	0.667027	-0.0379968	-0.00668199	10	P1P2	0.00885099	0.0400235	10	P1P2	0.786654	0.171315	10
C12orf80	P1P2	0.405082	-0.132527	-0.0520112	9	P1P2	0.424364	0.0150361	9	P1P2	0.527998	-0.326561	9
C13orf35	ENST00000356049.1	0.536584	-0.206381	-0.0557978	9	ENST00000356049.1	0.294011	0.0424207	9	ENST00000356049.1	0.778956	-0.129561	9
C13orf45	P1P2	0.863807	0.00408024	0.000259434	10	P1P2	0.121475	0.0429522	10	P1P2	0.723886	0.122769	10
C14orf1	P1P2	0.897842	-0.017847	-0.00083524	10	P1P2	0.688094	-0.00721051	10	P1P2	0.828852	-0.15752	10
C14orf105	P1P2	0.893268	-0.0192947	-0.000945788	10	P1P2	0.872519	-0.013736	10	P1P2	0.717163	0.0433067	10
C14orf119	P1P2	0.87431	-0.227507	-0.0132716	10	P1P2	0.583226	0.013922	10	P1P2	0.989191	-0.412037	10
C14orf132	P1P2	0.156741	-0.188666	-0.151842	10	P1P2	0.564212	0.00559731	10	P1P2	0.227293	-0.426273	10
C14orf142	P1P2	0.683822	-0.0974532	-0.0160853	10	P1P2	0.630456	-0.0163229	10	P1P2	0.540829	-0.163471	10
C14orf159	P1P2	0.228796	-0.0822657	-0.0526954	9	P1P2	0.930797	-0.014298	10	P1P2	0.23307	-0.134021	10
C14orf164	P1P2	0.824133	0.0322376	0.00270804	10	P1P2	0.524802	0.0248895	10	P1P2	0.992128	0.147888	10
C14orf166	P1P2	0.127164	0.239482	0.214489	10	P1P2	0.0285554	-0.0888261	10	P1P2	0.406239	0.195014	10
C14orf166B	P1P2	0.175186	0.224503	0.169837	8	P1P2	0.371788	-0.0253427	8	P1P2	0.239924	0.293696	8
C14orf169	P1P2	0.347642	-0.240541	-0.110376	9	P1P2	0.0262803	0.0317205	10	P1P2	0.744849	-0.196975	10
C14orf177	ENST00000325812.2	0.430282	-0.234955	-0.0860517	10	ENST00000325812.2	0.916792	0.0280491	10	ENST00000325812.2	0.461109	-0.388798	10
C14orf178	P1P2	0.65853	0.0623636	0.0113143	10	P1P2	0.321628	-0.117483	10	P1P2	0.81442	-0.220806	10
C14orf180	P1	0.0383537	-0.305184	-0.4322	9	P2	0.238727	-0.0393485	10	P1	0.0523701	-0.68549	9
C14orf182	P1P2	0.57804	-0.0511634	-0.0121791	8	P1P2	0.405396	-0.0341126	9	P1P2	0.481124	-0.172929	9
C14orf183	ENST00000305273.1	0.234034	0.0852913	0.053795	10	ENST00000305273.1	0.664028	-0.0128314	10	ENST00000305273.1	0.223461	0.19454	10
C14orf2	P1P2	0.0377028	-0.247297	-0.352059	10	P1P2	0.0315983	-0.0768856	10	P1P2	0.00349082	-0.683593	10
C14orf28	P1P2	0.239987	0.138424	0.0857968	9	P1P2	0.965542	-0.0578667	10	P1P2	0.395424	0.0541072	10
C14orf37	ENST00000267485.7	0.483684	-0.0491452	-0.0155023	7	ENST00000267485.7	0.765194	-0.0496942	9	ENST00000267485.7	0.252435	-0.0627719	9
C14orf39	P1P2	0.35754	0.152915	0.0683031	10	P1P2	0.885267	0.00901417	10	P1P2	0.357309	0.26247	10
C14orf79	P1P2	0.56867	0.015089	0.00369891	8	P1P2	0.0629714	-0.128034	10	P1P2	0.687892	-0.395318	10
C14orf80	P1P2	0.162638	-0.186444	-0.147063	10	P1P2	0.771657	-0.028031	10	P1P2	0.0878758	-0.367454	10
C14orf93	P1	0.46042	-0.00629465	-0.00212032	10	P2	0.522028	0.00979223	10	P1	0.641482	-0.0448892	10
C15orf26	ENST00000286732.4	0.532238	-0.235537	-0.0645121	10	ENST00000286732.4	0.673443	-0.0216464	10	ENST00000286732.4	0.460482	-0.489345	10
C15orf27	P1P2	0.571977	-0.031364	-0.00760958	10	P1P2	0.118465	0.00685176	10	P1P2	0.790394	0.00559328	10
C15orf32	P1P2	0.47808	0.0892889	0.028617	10	P1P2	0.235928	-0.0565601	10	P1P2	0.425819	-0.18156	10
C15orf38	P1P2	0.72899	0.0878589	0.0120611	10	P1P2	0.545989	-0.0225819	10	P1P2	0.690483	0.127084	9
C15orf38-AP3S2	P2	0.35445	0.108754	0.0489875	10	P2	0.320983	-0.0190739	10	P2	0.350412	0.136862	9
C15orf39	P1P2	0.620901	-0.0653256	-0.0135209	8	P1P2	0.232536	-0.0474287	8	P1P2	0.434362	-0.233154	8
C15orf40	P1P2	0.225549	-0.222278	-0.14376	9	P1P2	0.0880105	-0.0689261	10	P1P2	0.0951148	-0.737971	10
C15orf41	P1P2	0.728083	0.0356926	0.00491913	8	P1P2	2.88839e-05	-0.192281	10	P1P2	0.00961515	-0.831444	10
C15orf43	P1P2	0.52719	-0.0490121	-0.013627	10	P1P2	0.720712	0.0430326	10	P1P2	0.871087	-0.0910507	10
C15orf48	P1P2	0.893268	-0.120211	-0.00589249	10	P1P2	0.408996	-0.00630665	10	P1P2	0.6716	-0.178278	10
C15orf52	P1	0.333496	-0.102195	-0.048738	8	P2	0.464042	-0.0571357	10	P1	0.512398	-0.10549	8
C15orf53	P1P2	0.790493	-0.0722114	-0.00737293	10	P1P2	0.708321	-0.0172987	10	P1P2	0.689844	-0.129999	10
C15orf54	P1P2	0.685892	-0.0811321	-0.0132849	10	P1P2	0.167068	0.00311216	10	P1P2	0.958191	0.0963094	10
C15orf56	P1P2	0.718988	0.0287186	0.00411476	10	P1P2	0.49806	0.012535	10	P1P2	0.554065	0.0553948	10
C15orf57	P1P2	0.188258	-0.164671	-0.119427	10	P1P2	0.00397616	-0.098424	10	P1P2	0.0248764	-0.490325	10
C15orf59	P1P2	0.740494	-0.0278164	-0.00362944	10	P1P2	0.0679775	-0.057755	10	P1P2	0.626795	-0.235402	10
C15orf60	P1P2	0.947281	-0.0310725	-0.000730856	10	P1P2	0.0676677	-0.0343911	10	P1P2	0.656312	-0.125724	10
C15orf61	P1P2	0.026327	-0.367645	-0.580732	8	P1P2	0.357323	-0.0838358	9	P1P2	0.00775078	-0.886223	9
C15orf62	P1P2	0.529808	-0.168266	-0.0464215	10	P1P2	0.978782	-0.00276475	10	P1P2	0.544735	-0.125762	10
C15orf65	P1P2	0.973272	-0.018376	-0.000216211	10	P1P2	0.794231	-0.000949791	10	P1P2	0.905405	-0.139691	10
C16orf11	P1P2	0.723686	-0.0682616	-0.00958734	9	P1P2	0.134078	-0.0641488	10	P1P2	0.387692	-0.308629	10
C16orf13	P1P2	0.376436	0.0976797	0.0414463	10	P1P2	0.884106	-0.0244503	10	P1P2	0.528139	0.214765	10
C16orf3	ENST00000408886.2	0.522647	0.0729528	0.0205574	10	ENST00000408886.2	0.380347	0.0371516	9	ENST00000408886.2	0.312901	-0.109377	10
C16orf45	P1P2	0.754831	-0.00571221	-0.000697748	9	P1P2	0.0414107	0.049006	9	P1P2	0.673627	0.0294458	9
C16orf46	P1P2	0.594925	0.0875064	0.019736	8	P1P2	0.102633	-0.0790569	10	P1P2	0.847263	0.0769046	10
C16orf47	ENST00000358463.2	0.885172	-0.0694985	-0.00368149	9	ENST00000358463.2	0.551629	0.0406874	9	ENST00000358463.2	0.86282	0.0261183	9
C16orf52	P1P2	0.433981	0.0764924	0.0277308	8	P1P2	0.219573	-0.101886	9	P1P2	0.969412	-0.116779	9
C16orf54	P1P2	0.635101	0.0769353	0.0151684	10	P1P2	0.126575	-0.0653155	10	P1P2	0.720687	0.00879012	10
C16orf58	P1P2	0.942561	-0.0353965	-0.000909352	10	P1P2	0.138915	0.00860378	10	P1P2	0.634435	-0.0611038	10
C16orf59	P1P2	0.34901	-0.0615432	-0.0281352	7	P1P2	0.00272329	-0.229988	9	P1P2	0.00558943	-0.877199	9
C16orf62	P1P2	0.219341	-0.134524	-0.0886355	10	P1P2	0.0490869	-0.0436486	10	P1P2	0.0609514	-0.356452	10
C16orf70	P1P2	0.707814	0.0571761	0.00858103	9	P1P2	0.0850157	-0.0628422	10	P1P2	0.837356	-0.146207	10
C16orf71	P1P2	0.930887	-0.0113195	-0.000352068	10	P1P2	0.965073	-0.0165754	10	P1P2	0.987076	0.108254	10
C16orf72	P1	0.32803	-0.210575	-0.101936	9	P2	0.00505527	-0.0977206	10	P1	0.111729	-0.57135	9
C16orf74	P1P2	0.15441	0.215127	0.174538	10	P1P2	0.234421	-0.0231116	10	P1P2	0.262196	0.360906	10
C16orf78	P1P2	0.325135	0.121178	0.0591269	10	P1P2	0.0109963	0.0755132	10	P1P2	0.0374169	0.412411	10
C16orf80	P1P2	0.125656	-0.206212	-0.18576	10	P1P2	0.101248	-0.0659804	10	P1P2	0.0348415	-0.622757	10
C16orf82	P1P2	0.66738	-0.00961098	-0.00168795	8	P1P2	0.875915	-0.0544779	9	P1P2	0.950238	-0.0799946	9
C16orf86	P1P2	0.268738	-0.283759	-0.161933	10	P1P2	0.601306	0.0139172	10	P1P2	0.348381	-0.538413	10
C16orf87	P1P2	0.000259919	0.417838	1.49802	9	P1P2	0.1907	-0.138546	10	P1P2	0.00950469	0.678638	10
C16orf89	P1P2	0.51038	-0.100246	-0.0292825	10	P1P2	0.85081	-0.025185	10	P1P2	0.401594	-0.236865	10
C16orf90	P1P2	0.168093	-0.226732	-0.175593	9	P1P2	0.286522	0.019588	9	P1P2	0.27806	-0.300267	9
C16orf91	P1P2	0.337906	-0.15146	-0.0713688	10	P1P2	0.118951	0.0457011	10	P1P2	0.741286	-0.260838	10
C16orf92	P1P2	0.714101	0.007279	0.00106448	9	P1P2	0.549316	-0.0224437	10	P1P2	0.518268	0.0412623	10
C16orf93	P1P2	0.310043	-0.211155	-0.107389	9	P1P2	0.179973	-0.0191279	10	P1P2	0.226274	-0.404242	10
C16orf95	P1P2	0.734121	-0.0899085	-0.0120686	10	P1P2	0.884686	0.00724439	10	P1P2	0.683237	-0.100441	10
C16orf96	P1P2	0.790109	0.0383028	0.00391887	9	P1P2	0.190103	-0.0430024	10	P1P2	0.778736	-0.0555173	10
C16orf97	ENST00000566314.1	0.38195	-0.0316313	-0.0132217	9	ENST00000566314.1	0.114599	-0.0637325	10	ENST00000566628.1	0.714634	-0.0152672	10
C17orf100	P1P2	0.720208	-0.0813818	-0.0116003	10	P1P2	0.000150259	-0.111228	10	P1P2	0.0692161	-0.485658	10
C17orf102	P1P2	0.494307	-0.0989705	-0.0302853	9	P1P2	0.599912	0.0247524	9	P1P2	0.671927	-0.193733	9
C17orf103	P1P2	0.61328	0.127031	0.026974	10	P1P2	0.172643	-0.0355524	10	P1P2	0.847147	0.143717	10
C17orf104	P1P2	0.994513	-0.133793	-0.000319702	9	P1P2	0.674087	-0.0229833	10	P1P2	0.719585	-0.301339	10
C17orf105	P1P2	0.321214	-0.185358	-0.0914197	10	P1P2	0.968119	-0.0068555	10	P1P2	0.313466	-0.228199	10
C17orf107	P1P2	0.718655	0.0259807	0.0037277	10	P1P2	0.575284	-0.0069903	10	P1P2	0.856268	0.0551658	10
C17orf112	P1P2	0.330117	-0.144507	-0.0695557	10	P1P2	0.867545	0.00360071	10	P1P2	0.398873	-0.269376	10
C17orf47	P1P2	0.454228	-0.115777	-0.0396798	10	P1P2	0.230113	-0.0343628	10	P1P2	0.269471	-0.383929	10
C17orf49	P2	0.502412	0.0258449	0.00772608	10	P1	1.36109e-05	-0.276061	10	P1	0.00192235	-0.814034	10
C17orf50	P1P2	0.184404	-0.202716	-0.14884	10	P1P2	0.0334467	0.0582834	10	P1P2	0.476016	-0.144161	10
C17orf51	P1	0.606451	0.0446104	0.00968956	9	P1	0.199992	-0.0298669	9	P1	0.851607	0.120973	9
C17orf53	P1P2	0.318688	0.104692	0.0519938	9	P1P2	0.69077	-0.0118556	9	P1P2	0.300447	0.239365	9
C17orf58	P1P2	0.304862	0.0547182	0.0282289	10	P1P2	0.721372	0.0205292	10	P1P2	0.230827	0.127907	10
C17orf59	P1P2	0.223559	-0.177566	-0.115526	8	P1P2	0.0427472	-0.0728015	10	P1P2	0.0455747	-0.673385	10
C17orf62	P1P2	0.96707	-0.0379127	-0.000551333	8	P1P2	0.706481	-0.0129238	9	P1P2	0.975107	-0.142284	9
C17orf64	P1	0.779666	-0.0460838	-0.00498127	10	P1	0.0707953	0.00408988	10	P2	0.519608	0.105229	9
C17orf66	P1P2	0.848532	0.0212111	0.00151302	9	P1P2	0.837585	-0.0149511	10	P1P2	0.713535	0.0482962	10
C17orf67	P1P2	0.534549	-0.0795015	-0.0216254	8	P1P2	0.0870268	-0.0801747	9	P1P2	0.161936	-0.3797	9
C17orf70	P1P2	0.34039	0.0844201	0.0395106	9	P1P2	0.0917953	-0.103336	10	P1P2	0.810536	-0.148606	10
C17orf72	P1P2	0.0909664	-0.208443	-0.217014	9	P1P2	0.334732	0.0120805	9	P1P2	0.152734	-0.412026	8
C17orf74	P1P2	0.556442	0.107891	0.0274668	9	P1P2	0.456454	-0.0303509	10	P1P2	0.91825	0.0724527	10
C17orf75	P1P2	0.136784	0.140132	0.121069	10	P1P2	0.324578	-0.037349	10	P1P2	0.171444	0.0702666	10
C17orf77	ENST00000328023.2	0.659173	-0.0487467	-0.00882316	10	ENST00000392620.1	0.0382091	-0.0455954	10	ENST00000328023.2	0.52487	-0.109033	10
C17orf78	P1P2	0.981903	-0.111769	-0.000886473	10	P1P2	0.316916	0.0252407	10	P1P2	0.926787	-0.0878364	10
C17orf80	P1P2	0.68731	0.0156507	0.00254868	10	P1P2	0.508809	-0.0332328	9	P1P2	0.806315	-0.110432	10
C17orf82	P1P2	0.912053	0.0178946	0.000715421	10	P1P2	0.0531987	0.0321448	10	P1P2	0.461736	0.152786	10
C17orf85	P1P2	0.290575	-0.101099	-0.054264	9	P1P2	0.00297113	-0.0400579	10	P1P2	0.0487364	-0.419386	10
C17orf89	P1P2	0.34832	-0.165071	-0.0756058	10	P1P2	0.447618	-0.02669	10	P1P2	0.259013	-0.338379	10
C17orf96	P1P2	0.233219	-0.167543	-0.105927	10	P1P2	0.0775295	-0.0469256	10	P1P2	0.104449	-0.615476	10
C17orf97	P1P2	0.97942	-0.0252118	-0.00022769	10	P1P2	0.926827	0.00111292	10	P1P2	0.905522	-0.026427	10
C17orf98	P1P2	0.208897	0.15535	0.105649	9	P1P2	0.792283	-0.0458714	9	P1P2	0.184347	0.162395	9
C17orf99	P1P2	0.288801	0.0962011	0.051891	10	P1P2	0.516788	0.00540876	10	P1P2	0.188161	0.318381	10
C18orf21	P1P2	0.272349	-0.203697	-0.115063	10	P1P2	0.168199	0.0088802	10	P1P2	0.480035	-0.383669	10
C18orf25	P1P2	0.619029	-0.0978365	-0.0203783	8	P1P2	0.239811	-0.0437369	9	P1P2	0.490158	-0.251301	9
C18orf32	P1P2	0.133568	0.227817	0.19918	10	P1P2	0.398653	-0.0238888	10	P1P2	0.146432	0.358127	10
C18orf42	P1P2	0.0914081	-0.199505	-0.207289	10	P1P2	0.972922	0.0063232	10	P1P2	0.146883	-0.280236	10
C18orf54	P1P2	0.678604	0.044401	0.00747641	10	P1P2	0.115684	-0.0930477	10	P1P2	0.926202	-0.188552	10
C18orf56	P1P2	0.950705	-0.0678836	-0.00149034	10	P1P2	0.506297	-0.0213828	10	P1P2	0.86807	0.0333003	9
C18orf63	P1P2	0.491144	-0.0935475	-0.0288866	10	P1P2	0.722912	-0.00711157	10	P1P2	0.476472	-0.214976	10
C18orf8	P1P2	0.54652	-0.0615106	-0.01614	9	P1P2	0.00445729	0.0491851	9	P1P2	0.99251	0.0442619	8
C19orf10	P1P2	0.17418	0.0518665	0.0393667	10	P1P2	0.994255	0.000972159	10	P1P2	0.1966	0.369479	10
C19orf12	P1P2	0.353295	-0.0808531	-0.0365344	10	P1P2	0.546362	-0.00913505	9	P1P2	0.309734	-0.211386	10
C19orf18	P1P2	0.0833179	0.127275	0.137363	10	P1P2	0.129968	0.0294198	10	P1P2	0.0438513	0.359353	10
C19orf24	P1P2	0.339327	0.0640579	0.0300676	10	P1P2	0.227103	-0.0558924	10	P1P2	0.565066	0.0458402	10
C19orf25	P1P2	0.601876	-0.0500748	-0.0110411	10	P1P2	0.0134087	-0.0678784	10	P1P2	0.10997	-0.289958	10
C19orf26	P1P2	0.486009	-0.0570362	-0.0178726	6	P1P2	0.00136032	-0.110777	8	P1P2	0.0525244	-0.401119	8
C19orf33	P1P2	0.995742	0.0659602	0.000122247	10	P1P2	0.853345	-0.00737619	10	P1P2	0.942946	0.0793391	9
C19orf35	P1P2	0.3711	-0.0770583	-0.0331743	10	P1P2	0.066375	0.0348603	10	P1P2	0.718044	-0.109733	10
C19orf38	P1P2	0.322572	0.199397	0.0979786	9	P1P2	0.636476	-0.00885742	9	P1P2	0.200054	0.339972	8
C19orf40	P1P2	0.989827	-0.0736966	-0.000327252	10	P1P2	0.86119	-0.0173991	10	P1P2	0.920939	-0.179915	10
C19orf43	P1P2	0.180173	-0.117412	-0.0873914	9	P1P2	0.0122862	0.0472624	9	P1P2	0.518803	-0.150446	9
C19orf44	P1P2	0.573773	0.109571	0.026435	9	P1P2	0.908858	-0.00406856	9	P1P2	0.421752	0.221876	9
C19orf45	P2	0.41349	0.169649	0.0650662	10	P2	0.0310325	-0.0426787	10	P1	0.721279	-0.0560452	9
C19orf47	P1	0.689764	-0.1311	-0.0211463	9	P1	0.090807	-0.0346088	9	P1	0.496427	-0.356401	9
C19orf48	P1P2	0.111197	-0.193411	-0.184497	10	P1P2	0.98727	-0.0118664	9	P1P2	0.121595	-0.371081	10
C19orf52	P1P2	0.984269	-0.00789163	-5.43449e-05	10	P1P2	0.439314	-0.0215612	10	P1P2	0.856384	0.0173879	10
C19orf53	P1P2	0.708923	0.0304671	0.00455181	10	P1P2	0.161189	-0.0348922	10	P1P2	0.89305	0.0899946	10
C19orf54	P1P2	0.563437	-0.0143538	-0.00357633	10	P1P2	0.587672	-0.0262951	10	P1P2	0.682156	0.0606333	10
C19orf55	P1P2	0.970671	0.00372725	4.81859e-05	10	P1P2	0.750945	0.00180257	10	P1P2	0.905288	-0.11491	10
C19orf57	P1P2	0.365026	-0.0510097	-0.0223257	10	P1P2	0.663922	0.00580617	10	P1P2	0.459409	-0.122513	10
C19orf59	P1P2	0.947635	-0.0126949	-0.000296536	10	P1P2	0.308884	0.0457312	10	P1P2	0.670204	0.166212	10
C19orf60	P1P2	0.0708911	0.318943	0.366596	10	P1P2	0.895951	-0.0165438	10	P1P2	0.0499966	0.377177	10
C19orf66	P1P2	0.0159067	-0.352597	-0.634117	10	P1P2	0.596304	-0.0194425	10	P1P2	0.00838407	-0.528688	10
C19orf67	P1P2	0.649329	-0.0790914	-0.0148324	10	P1P2	0.951375	-0.00502427	10	P1P2	0.612667	0.0471005	10
C19orf68	P1P2	0.692334	0.128428	0.0205079	10	P1P2	0.456188	-0.0635035	10	P1P2	0.732292	0.197314	10
C19orf69	P1P2	0.320664	0.165534	0.0817653	9	P1P2	0.569366	-0.022057	9	P1P2	0.375129	0.25996	9
C19orf70	P1P2	0.0970644	0.229789	0.232762	10	P1P2	0.98054	0.0105872	10	P1P2	0.0772631	0.358909	10
C19orf71	P1P2	0.530099	0.0539409	0.0148684	10	P1P2	0.616426	-0.025941	10	P1P2	0.814077	0.177472	10
C19orf73	P1P2	0.798788	-0.0177855	-0.00173531	9	P1P2	0.35603	0.0190383	9	P1P2	0.911371	0.126995	9
C19orf77	P1P2	0.0112619	-0.351177	-0.684229	9	P1P2	0.805684	-0.00236493	9	P1P2	0.0224938	-0.703856	9
C19orf80	P1P2	0.0490603	-0.390299	-0.511006	10	P1P2	0.81253	-0.0162175	10	P1P2	0.0379016	-0.645422	9
C19orf81	P1P2	0.606233	-0.0496015	-0.0107814	9	P1P2	0.402516	0.0185723	9	P1P2	0.803473	-0.0847987	9
C19orf82	P1P2	0.0455546	-0.230821	-0.309638	10	P1P2	0.723573	-0.0188918	10	P1P2	0.0295868	-0.432069	10
C1D	P1P2	0.431757	0.175031	0.0638446	10	P1P2	0.0421189	-0.0507023	10	P1P2	0.70433	0.179268	10
C1GALT1	P1P2	0.0569266	0.148535	0.184879	10	P1P2	0.705808	-0.0129772	10	P1P2	0.0943874	0.23615	10
C1GALT1C1	P1P2	0.258481	0.0950223	0.0558324	10	P1P2	0.989214	-0.0257756	10	P1P2	0.348533	0.102016	10
C1QA	P1P2	0.50194	-0.197345	-0.0590749	10	P1P2	0.511576	-0.0117368	10	P1P2	0.463171	-0.246208	10
C1QB	P1P2	0.79553	-0.0769188	-0.00764136	9	P1P2	0.504843	0.00579169	9	P1P2	0.926774	-0.227618	9
C1QBP	P1P2	0.141619	-0.206912	-0.175643	10	P1P2	0.0949512	-0.0878126	10	P1P2	0.0189784	-0.685006	10
C1QC	P1P2	0.169345	0.161632	0.124655	10	P1P2	0.52394	-0.0321284	10	P1P2	0.215283	0.315918	10
C1QL1	P1P2	0.400075	0.106392	0.042329	10	P1P2	0.340262	-0.0286622	10	P1P2	0.547084	0.170051	10
C1QL2	P1P2	0.109642	0.195971	0.188137	10	P1P2	0.69655	-0.0120895	10	P1P2	0.113134	0.405059	9
C1QL3	P1P2	0.932988	-0.0570474	-0.0017185	9	P1P2	0.0807312	0.014256	9	P1P2	0.793043	0.16781	9
C1QL4	P1P2	0.446948	-0.129971	-0.0454565	8	P1P2	0.0314705	-0.0744683	10	P1P2	0.142222	-0.458414	10
C1QTNF1	P1P2	0.525641	-0.140602	-0.0392718	10	P1P2	0.122148	0.039138	10	P1P2	0.80301	-0.087409	10
C1QTNF2	P1P2	0.149046	0.232035	0.191818	9	P1P2	0.188394	0.0246532	9	P1P2	0.11484	0.597046	9
C1QTNF3	P1P2	0.254415	0.0899826	0.0534909	8	P1P2	0.322831	-0.0216746	7	P1P2	0.419983	0.161676	8
C1QTNF4	P1P2	0.665176	-0.00510946	-0.0009047	9	P1P2	0.768151	0.00967035	9	P1P2	0.610286	0.0138366	9
C1QTNF5	P1	0.742735	-0.0883506	-0.0114119	10	P1	0.628577	0.00857976	10	P2	0.82758	0.157005	9
C1QTNF6	P1P2	0.16318	-0.183191	-0.144232	9	P1P2	0.722781	0.0200617	9	P1P2	0.321573	-0.245039	9
C1QTNF7	ENST00000429690.1	0.205854	-0.225867	-0.155044	10	ENST00000429690.1	0.723463	-0.0124037	10	ENST00000429690.1	0.178943	-0.466816	10
C1QTNF8	P1P2	0.719239	0.0886816	0.0126927	9	P1P2	0.21216	-0.011153	9	P1P2	0.672244	0.109395	8
C1QTNF9	ENST00000332018.4	0.0576645	0.163498	0.202589	10	ENST00000332018.4	0.84379	0.00984815	10	ENST00000332018.4	0.0344378	0.300206	10
C1QTNF9B	ENST00000382137.3	0.4251	-0.0589495	-0.0219003	10	ENST00000382137.3	0.239959	0.0317076	10	ENST00000382140.2	0.400634	-0.314445	9
C1QTNF9B-AS1	P1P2	0.0147312	0.297622	0.545174	10	P1P2	0.190103	-0.0534547	10	P1P2	0.0854122	0.494293	10
C1R	P1P2	0.114614	-0.233359	-0.219536	9	P1P2	0.763776	0.00495858	9	P1P2	0.127115	-0.440498	9
C1RL	P1P2	0.727765	0.0913157	0.0126023	10	P1P2	0.505076	0.0177111	10	P1P2	0.569355	0.382732	10
C1S	P1P2	0.443837	0.0851191	0.030028	10	P1P2	0.124508	-0.0754784	10	P1P2	0.971338	-0.0668392	10
C1orf100	P1P2	0.739263	-0.0368584	-0.00483587	10	P1P2	0.771881	-0.0110401	10	P1P2	0.671492	-0.0789464	10
C1orf101	P1P2	0.899382	0.0527644	0.00243011	9	P1P2	0.419581	-0.0392358	10	P1P2	0.792085	-0.107824	9
C1orf105	ENST00000367727.4	0.677736	0.0607032	0.0102552	10	ENST00000367727.4	0.278371	0.0318716	10	ENST00000367727.4	0.347058	0.153347	9
C1orf106	P1	0.0194032	-0.356012	-0.609537	9	P1	0.309602	-0.0632392	9	P1	0.0118371	-0.894836	9
C1orf109	P1	0.391169	-0.173743	-0.0708239	10	P1	0.100515	-0.0432329	10	P1	0.211168	-0.440198	10
C1orf110	P1	0.136043	0.205692	0.178196	10	P2	0.0608172	-0.0529086	10	P1	0.174415	0.46247	10
C1orf111	P1P2	0.188955	-0.20783	-0.150394	10	P1P2	0.00512248	0.0758567	10	P1P2	0.727974	-0.164292	10
C1orf112	P1P2	0.219397	0.161974	0.106704	10	P1P2	0.531914	0.0114994	10	P1P2	0.147047	0.325572	10
C1orf115	P1P2	0.917228	0.0427795	0.0016052	10	P1P2	0.33722	0.0207029	10	P1P2	0.66004	-0.0319236	10
C1orf116	P1P2	0.461357	-0.0659231	-0.0221477	9	P1P2	0.344604	0.0122483	9	P1P2	0.682946	-0.126601	9
C1orf122	P1P2	0.359791	0.138017	0.0612728	10	P1P2	0.608691	-0.0278776	10	P1P2	0.294557	0.240099	10
C1orf123	P1P2	0.114019	0.167523	0.157978	10	P1P2	0.816408	-0.0431353	10	P1P2	0.208705	0.377575	10
C1orf127	P1P2	0.285187	-0.113953	-0.0620897	9	P1P2	0.562327	-0.0363753	10	P1P2	0.19482	-0.304268	10
C1orf131	P1P2	0.0746365	0.244309	0.275348	9	P1P2	0.157444	-0.172869	10	P1P2	0.587781	-0.0983051	10
C1orf134	ENST00000375605.2	0.883547	-0.0225818	-0.00121424	10	ENST00000375605.2	0.398571	0.0308015	10	ENST00000375605.2	0.824379	0.0768759	10
C1orf137	ENST00000369482.1	0.421494	-0.093054	-0.0349146	10	ENST00000369482.1	0.791739	0.0211775	10	ENST00000369482.1	0.578785	-0.384517	10
C1orf141	P1P2	0.247701	-0.232009	-0.140614	9	P1P2	0.025265	-0.0783598	10	P1P2	0.0953777	-0.553025	10
C1orf146	P1P2	0.389052	-0.173314	-0.0710575	9	P1P2	0.579501	-0.020037	9	P1P2	0.53278	-0.235196	9
C1orf158	P1P2	0.70549	-0.043346	-0.0065673	9	P1P2	0.605301	-0.01111	10	P1P2	0.500782	-0.0561315	10
C1orf159	P1P2	0.671091	-0.0533789	-0.00924622	9	P1P2	0.645679	-0.00652201	9	P1P2	0.579004	-0.105676	9
C1orf162	P1P2	0.860312	-0.0759168	-0.00496071	10	P1P2	0.369443	0.0303346	10	P1P2	0.697672	0.150261	10
C1orf167	P1P2	0.557744	0.0503178	0.0127588	10	P1P2	0.889329	0.00792375	10	P1P2	0.500126	0.264298	10
C1orf168	P1P2	0.21011	0.109566	0.074237	8	P1P2	0.0215162	0.0609668	8	P1P2	0.0392555	0.503025	8
C1orf172	P1P2	0.420147	-0.0303039	-0.0114124	9	P1P2	0.247009	-0.0368536	9	P1P2	0.371795	-0.394074	9
C1orf173	P1P2	0.696934	-0.0291846	-0.00457638	10	P1P2	0.256571	0.017998	10	P1P2	0.812854	0.0627792	9
C1orf174	P1P2	0.804104	-0.0787753	-0.00745905	9	P1P2	0.700139	-0.0570114	10	P1P2	0.562082	-0.374288	10
C1orf177	P1P2	0.372576	0.130227	0.0558394	9	P1P2	0.318162	-0.0236713	9	P1P2	0.373877	0.297139	9
C1orf185	P1P2	0.648476	0.0784973	0.0147658	10	P1P2	0.890258	-0.00497212	10	P1P2	0.581407	0.0612177	10
C1orf186	P1P2	0.99101	-0.0286914	-0.000112524	10	P1P2	0.273192	-0.0358585	10	P1P2	0.873639	0.00454081	10
C1orf189	P1P2	0.468203	-0.0657128	-0.0216567	10	P1P2	0.337368	-0.0150833	10	P1P2	0.372506	-0.170784	10
C1orf192	P1P2	0.861532	-0.0237473	-0.00153713	9	P1P2	0.476508	-0.0505911	10	P1P2	0.819453	-0.13627	10
C1orf194	P2	0.34285	0.152856	0.0710623	9	P2	0.184841	-0.0182388	10	P2	0.608004	0.160595	9
C1orf195	P1P2	0.936074	-0.033199	-0.000952473	10	P1P2	0.585851	0.0110131	10	P1P2	0.815449	0.0230956	10
C1orf198	P1	0.231769	-0.144456	-0.0917216	10	P1	0.0694536	0.0254351	10	P1	0.461825	-0.220888	10
C1orf204	P1P2	0.194925	-0.177455	-0.126017	9	P1P2	0.140031	0.0385972	9	P1P2	0.340806	-0.237885	9
C1orf21	P1P2	0.599504	-0.0477188	-0.0106035	10	P1P2	0.485655	0.0163839	10	P1P2	0.816478	-0.104855	10
C1orf210	P1P2	0.112864	0.203461	0.192767	9	P1P2	0.984056	-0.0111511	10	P1P2	0.155951	0.384508	10
C1orf216	P1P2	0.848564	-0.0498968	-0.0035584	10	P1P2	0.261594	-0.0459758	10	P1P2	0.516743	-0.109776	10
C1orf222	P1P2	0.892335	-0.0677872	-0.00335359	9	P1P2	0.761224	-0.0455326	10	P1P2	0.859737	-0.153735	10
C1orf226	P1	0.453692	-0.133187	-0.0457151	9	P1	0.481777	-0.0225955	9	P1	0.335871	-0.375324	9
C1orf227	P1P2	0.340528	0.129571	0.0606197	10	P1P2	0.593352	-0.00477139	10	P1P2	0.416214	0.345056	10
C1orf228	ENST00000458657.2,ENST00000535358.1	0.648583	0.0127137	0.00239062	10	ENST00000458657.2,ENST00000535358.1	0.863153	0.0294706	10	ENST00000458657.2,ENST00000535358.1	0.383981	0.152053	10
C1orf229	P1P2	0.169884	-0.189321	-0.145748	9	P1P2	0.739602	0.00528185	10	P1P2	0.230368	-0.345984	9
C1orf233	P1P2	0.261365	0.0912754	0.0531909	10	P1P2	0.123538	-0.0680683	10	P1P2	0.794025	0.00563945	10
C1orf234	P1P2	0.263385	0.144271	0.0835918	10	P1P2	0.460552	-0.0183546	10	P1P2	0.414443	0.158354	10
C1orf27	P1P2	0.0333675	0.23331	0.344523	9	P1P2	0.889731	0.00764216	9	P1P2	0.022055	0.427371	8
C1orf35	P1P2	0.118029	0.146889	0.136314	9	P1P2	0.962439	-0.0129441	9	P1P2	0.138187	0.291783	9
C1orf43	P1P2	0.187756	-0.287909	-0.209139	9	P1P2	0.478421	-0.0362719	10	P1P2	0.0706257	-0.80582	10
C1orf50	P1P2	0.532779	-0.122534	-0.0335074	9	P1P2	0.506031	0.0503659	9	P1P2	0.809098	-0.177528	8
C1orf51	P1P2	0.0977532	-0.222178	-0.224371	10	P1P2	0.59061	-0.0195274	10	P1P2	0.0728547	-0.500965	10
C1orf52	P1P2	0.404113	-0.285727	-0.112433	9	P1P2	0.664349	-0.0533723	10	P1P2	0.219566	-0.606992	10
C1orf53	P1P2	0.0236757	-0.342879	-0.557417	10	P1P2	0.0691832	0.0437344	10	P1P2	0.0598632	-0.564476	10
C1orf54	P1P2	0.848042	0.00890289	0.00063729	9	P1P2	0.928228	-0.035969	10	P1P2	0.98226	0.00110398	10
C1orf56	P1P2	0.142552	0.148019	0.125227	9	P1P2	0.255327	-0.0485884	9	P1P2	0.297486	0.21443	9
C1orf61	P1	0.17921	-0.186647	-0.139358	9	P2	0.00426313	0.0781061	10	P1	0.0883318	-0.517924	9
C1orf63	P1P2	0.607152	-0.23178	-0.0502274	10	P1P2	0.319552	0.0311379	10	P1P2	0.738729	-0.201378	10
[truncated: 35,813 more rows]

## Sheet: Cri_C
Pfeiffer CRISPRi Cyclophosphamide screen
	rho scores (ie drug vs DMSO)					gamma growth scores (ie DMSO vs T=0)				tau scores (ie drug vs T=0)
gene	transcripts	Mann-Whitney p-value	average phenotype of strongest 5	Aggregate score	sgRNAs passing read count filter	transcripts	Mann-Whitney p-value	average phenotype of strongest 5	sgRNAs passing read count filter	transcripts	Mann-Whitney p-value	average phenotype of strongest 5	sgRNAs passing read count filter
A1BG	P1	0.535782	-0.0405504	-0.0109897	10	P1	0.394397	0.0158394	10	P1	0.686244	-0.0158793	10
A1CF	P1P2	0.76869	0.129683	0.0148161	10	P1P2	0.700139	0.0132369	10	P1P2	0.513171	0.745417	10
A2M	P1P2	0.475703	-0.0661685	-0.0213502	8	P1P2	0.641424	-0.0149697	8	P1P2	0.401611	-0.213326	8
A2ML1	P1P2	0.635701	-0.0592881	-0.0116648	10	P1P2	0.642093	0.0126331	10	P1P2	0.762448	-0.186542	10
A3GALT2	ENST00000442999.3	0.466873	0.00193282	0.000639378	10	ENST00000442999.3	0.651025	0.01664	9	ENST00000442999.3	0.672318	0.168583	10
A4GALT	P1P2	0.889839	0.0205021	0.00103922	9	P1P2	0.103864	-0.0466756	9	P1P2	0.497457	-0.0264644	9
A4GNT	P1P2	0.785737	0.0240785	0.00252157	9	P1P2	0.711494	-0.0237528	10	P1P2	0.802854	0.24741	10
AAAS	P1P2	0.248161	0.236118	0.142915	10	P1P2	0.645675	0.0245088	10	P1P2	0.130401	1.29945	10
AACS	P1P2	0.0373627	-0.130482	-0.186271	10	P1P2	0.392035	-0.0280061	10	P1P2	0.0145458	-0.879138	10
AADAC	P1P2	0.0993843	-0.152864	-0.153274	10	P1P2	0.361039	-0.0379859	10	P1P2	0.0316314	-0.61039	10
AADACL2	P1P2	0.0438586	-0.174283	-0.236667	7	P1P2	0.702291	-0.0205154	8	P1P2	0.037392	-0.592464	8
AADACL3	P1P2	0.349886	0.211799	0.0965957	9	P1P2	0.298164	-0.0358164	9	P1P2	0.39488	0.740219	9
AADACL4	P1P2	0.611549	0.13707	0.0292738	10	P1P2	0.98265	-0.00127065	10	P1P2	0.684511	0.984303	10
AADAT	P1P2	0.283924	0.269398	0.147306	10	P1P2	0.0676677	0.0485365	10	P1P2	0.0571665	1.28878	10
AAED1	P1P2	0.115166	-0.18639	-0.17496	9	P1P2	0.816522	-0.0672712	10	P1P2	0.0970836	-0.661486	10
AAGAB	P1P2	0.243894	0.198178	0.121443	8	P1P2	0.573262	-0.0105628	9	P1P2	0.211037	0.923329	9
AAK1	P1P2	0.383926	0.221951	0.0922769	10	P1P2	0.203453	0.0382569	10	P1P2	0.200455	1.11205	10
AAMDC	P1P2	0.936351	0.142371	0.00406627	8	P1P2	0.98245	-0.00478823	9	P1P2	0.950322	0.705419	9
AAMP	P1P2	0.553031	0.124293	0.0319744	10	P1P2	0.492577	-0.0840759	10	P1P2	0.831934	0.439777	10
AANAT	P1P2	0.1404	0.35539	0.303017	10	P1P2	0.538686	0.0199406	10	P1P2	0.117724	1.75176	10
AAR2	P1P2	0.440923	-0.0059293	-0.00210868	9	P1P2	0.00215084	-0.147999	10	P1P2	0.0261053	-0.657136	10
AARD	P1P2	0.634344	0.0161906	0.00320048	9	P1P2	0.767914	0.0105813	9	P1P2	0.728054	0.136247	9
AARS	P1P2	0.0359538	0.301136	0.434917	7	P1P2	1.91425e-05	-0.244765	10	P1P2	0.458421	-0.0704314	10
AARS2	P1P2	0.703832	0.0191903	0.00292711	9	P1P2	0.00648108	-0.103587	9	P1P2	0.0740797	-0.39175	9
AARSD1	P2	0.182054	0.250376	0.185228	10	P2	0.379321	-0.0323319	10	P1	0.239394	0.599709	10
AASDH	P1P2	0.784052	0.0791275	0.00836022	9	P1P2	0.376142	-0.0421158	10	P1P2	0.655839	-0.0019946	10
AASDHPPT	P1P2	0.456754	-0.0310203	-0.0105568	10	P1P2	0.0359418	-0.0566138	10	P1P2	0.219526	-0.512072	10
AASS	P1P2	0.715185	0.10538	0.0153414	10	P1P2	0.139032	0.0311859	10	P1P2	0.47566	0.732087	10
AATF	P1P2	0.932523	0.0415194	0.00125972	8	P1P2	0.0294308	-0.166011	10	P1P2	0.180551	-0.0386031	10
AATK	ENST00000326724.4	0.0259296	0.316923	0.502704	10	ENST00000326724.4	0.255464	-0.0584707	10	ENST00000326724.4	0.0642481	1.37152	10
ABAT	P1	0.661106	-0.0248569	-0.00446751	10	P2	0.482066	0.0145863	9	P1	0.719479	0.181744	10
ABCA1	P1P2	0.0456197	-0.0730179	-0.0979058	9	P1P2	0.911897	-0.0927622	10	P1P2	0.00965563	-0.413116	10
ABCA10	P1P2	0.566822	-0.00195784	-0.000482712	10	P1P2	0.635477	-0.00903698	10	P1P2	0.509759	-0.361795	10
ABCA12	P1P2	0.135086	-0.0637761	-0.0554463	10	P1P2	0.546771	0.0186725	10	P1P2	0.198493	-0.176706	10
ABCA13	P1P2	0.520348	0.236828	0.0671895	10	P1P2	0.99191	0.00417393	10	P1P2	0.435875	0.983599	10
ABCA2	P1P2	0.429917	0.125506	0.0460125	10	P1P2	0.670228	-0.0219498	10	P1P2	0.477577	0.629334	10
ABCA3	P1P2	0.484581	-0.0256675	-0.00807587	8	P1P2	0.0590196	-0.105325	10	P1P2	0.316624	-0.263463	10
ABCA4	P1P2	0.0176208	-0.101896	-0.178723	10	P1P2	0.0554069	0.0549029	10	P1P2	0.0492139	-0.248363	10
ABCA5	P1P2	0.319476	0.24585	0.121834	9	P1P2	0.573582	-0.025346	10	P1P2	0.478308	1.20523	10
ABCA6	P1P2	0.116575	0.239536	0.223581	10	P1P2	0.837241	-0.00131866	10	P1P2	0.17295	1.25164	10
ABCA7	P2	0.69962	0.0975866	0.0151394	10	P2	0.365304	-0.0112151	10	P2	0.615901	0.538853	10
ABCA8	P1P2	0.0929166	-0.126123	-0.130147	10	P1P2	0.879352	-0.0283372	10	P1P2	0.0465077	-0.640794	10
ABCA9	P1P2	0.654449	0.0641432	0.0118103	10	P1P2	0.127454	-0.0420043	10	P1P2	0.954987	0.320415	10
ABCB1	ENST00000265724.3	0.675261	0.0194276	0.00331295	10	ENST00000265724.3	0.734283	0.00339861	10	ENST00000265724.3	0.86113	0.221741	10
ABCB10	P1P2	0.568893	0.0982524	0.0240688	9	P1P2	0.158179	-0.0633656	10	P1P2	0.662133	0.302957	10
ABCB11	P1P2	0.622839	0.132986	0.0273451	10	P1P2	0.934418	-0.00969294	10	P1P2	0.640897	0.605277	10
ABCB4	P1P2	0.784961	0.0838914	0.00882133	10	P1P2	0.729087	-0.00863458	10	P1P2	0.700714	0.188603	10
ABCB5	P1P2	0.30551	0.0158082	0.00814084	8	P1P2	0.206206	-0.0638678	9	P1P2	0.0959881	-0.00198654	9
ABCB6	P1P2	0.805576	0.106879	0.0100352	10	P1P2	0.740378	0.0125622	10	P1P2	0.898094	0.614591	10
ABCB7	P1P2	0.523934	0.104421	0.0293134	9	P1P2	2.36155e-07	-0.209392	10	P1P2	0.00698163	-1.14763	10
ABCB8	P1P2	0.37935	0.0961867	0.0404908	9	P1P2	0.649477	-0.0292467	10	P1P2	0.36795	0.483616	10
ABCB9	P2	0.14911	-0.101272	-0.0837005	10	P1	0.396931	-0.0349363	10	P2	0.15272	-0.540201	10
ABCC1	P1P2	0.00763321	-0.256703	-0.543516	10	P1P2	0.720272	-0.0100562	10	P1P2	0.00540465	-1.13339	10
ABCC10	P1P2	0.224622	-0.0768017	-0.0498096	9	P1P2	0.713137	-0.01701	10	P1P2	0.204632	-0.325255	10
ABCC11	P1	0.564654	-0.0228643	-0.00567531	9	P1	0.155682	-0.059117	10	P1	0.40878	-0.274474	10
ABCC12	ENST00000311303.3	0.693174	0.0716132	0.0113978	9	ENST00000311303.3	0.193917	0.0531068	9	ENST00000311303.3	0.758718	0.693031	9
ABCC2	P1P2	0.410574	0.0175989	0.00680387	10	P1P2	0.376856	0.0239983	10	P1P2	0.52118	0.175983	10
ABCC3	P1P2	0.245134	-0.0720442	-0.04399	10	P1P2	0.982181	-0.0265748	10	P1P2	0.139714	-0.23492	10
ABCC4	P1P2	0.959744	0.000496063	8.85199e-06	10	P1P2	0.663708	-0.00441218	10	P1P2	0.854419	0.376081	10
ABCC5	P1P2	0.40813	0.105367	0.041009	10	P1P2	0.58575	0.00978813	10	P1P2	0.319624	0.520057	10
ABCC6	ENST00000205557.7	0.985959	0.0392874	0.000241265	8	ENST00000205557.7	0.106324	-0.0679133	9	ENST00000205557.7	0.478453	0.124306	9
ABCC8	P1P2	0.917588	0.089179	0.00333105	10	P1P2	0.0281631	-0.0461844	10	P1P2	0.497349	0.241721	10
ABCC9	P1P2	0.935751	0.110407	0.00318407	10	P1P2	0.757197	0.00439195	10	P1P2	0.903344	0.86342	10
ABCD1	P1P2	0.111045	0.229668	0.219218	10	P1P2	0.024808	-0.0633875	10	P1P2	0.307454	0.926321	10
ABCD2	P1P2	0.442778	0.180695	0.0639322	10	P1P2	0.806764	-0.0248111	9	P1P2	0.497629	0.81288	10
ABCD3	P1P2	0.391593	-0.00480162	-0.00195505	10	P1P2	0.311686	-0.0483245	10	P1P2	0.156735	-0.197587	10
ABCD4	P1P2	0.131137	-0.0439381	-0.0387655	10	P1P2	0.440358	-0.0174958	10	P1P2	0.0972916	-0.303938	10
ABCE1	P1P2	0.587129	0.0674242	0.0155929	7	P1P2	0.000271833	-0.25014	10	P1P2	0.0196269	-0.654065	10
ABCF1	P1	0.367999	0.162452	0.0705292	10	P2	0.158222	-0.0476406	10	P1	0.812786	0.461848	10
ABCF2	P1P2	0.183468	0.227838	0.167789	10	P1P2	0.0870029	0.0385479	10	P1P2	0.0608648	1.22172	10
ABCF3	P1P2	0.299065	0.180081	0.0944046	10	P1P2	0.193253	0.0220061	10	P1P2	0.177122	0.904075	10
ABCG1	P1P2	0.105629	0.165162	0.161234	10	P1P2	0.573481	-0.00543465	10	P1P2	0.131907	0.815315	10
ABCG2	P1P2	0.41145	0.00296273	0.00114267	9	P1P2	0.167366	0.0601757	9	P1P2	0.945731	0.415338	8
ABCG4	P1P2	0.420612	-0.0561515	-0.0211196	7	P1P2	0.859703	-0.026455	9	P1P2	0.817772	0.132004	9
ABCG5	P1P2	0.410293	0.209811	0.081177	9	P1P2	0.373904	-0.0465309	9	P1P2	0.680767	0.939456	9
ABCG8	P1P2	0.469878	-0.0388206	-0.0127337	10	P1P2	0.958164	0.00703198	10	P1P2	0.362415	-0.0216332	9
ABHD1	P1P2	0.664337	0.189888	0.0337263	10	P1P2	0.348887	-0.0248773	10	P1P2	0.885628	0.860599	10
ABHD10	P1P2	0.393509	0.000658276	0.000266631	9	P1P2	0.327111	-0.0686724	10	P1P2	0.19906	0.0810827	10
ABHD11	P1P2	0.900407	0.0808581	0.00368399	10	P1P2	0.549316	-0.0374091	10	P1P2	0.880696	0.194397	9
ABHD12	P1P2	0.689135	0.0584079	0.00944431	9	P1P2	0.137664	-0.0464656	10	P1P2	0.365993	0.144969	10
ABHD12B	P1P2	0.686472	0.0787592	0.0128675	10	P1P2	0.249495	0.0438618	10	P1P2	0.374256	0.70226	10
ABHD13	P1P2	0.277438	0.196598	0.109472	10	P1P2	0.160443	-0.0363517	10	P1P2	0.379028	0.831237	10
ABHD14A	P1P2	0.834314	0.181822	0.0143041	10	P1P2	0.264918	-0.0317229	10	P1P2	0.922396	0.807049	10
ABHD14B	P1	0.128355	0.168154	0.149924	10	P2	0.242674	-0.0410024	10	P1	0.129356	0.86476	10
ABHD15	P1P2	0.64111	0.177013	0.0341755	10	P1P2	0.515079	0.00987165	10	P1P2	0.457885	0.776632	10
ABHD16A	P1P2	0.0931221	-0.0855921	-0.0882409	9	P1P2	0.162246	-0.0551689	10	P1P2	0.0414846	-0.484731	10
ABHD16B	P1P2	0.126991	-0.116485	-0.104397	8	P1P2	0.648684	-0.0136192	9	P1P2	0.193664	-0.364546	9
ABHD17A	P1P2	0.698081	0.14131	0.0220577	10	P1P2	0.513279	-0.00528677	10	P1P2	0.564851	0.64989	10
ABHD17B	P1P2	0.709431	0.0908856	0.0135501	10	P1P2	0.175951	-0.0372855	10	P1P2	0.916196	0.263772	10
ABHD17C	P1P2	0.710964	0.149538	0.0221544	8	P1P2	0.0959175	-0.109679	9	P1P2	0.847106	0.273208	9
ABHD2	P1P2	0.540584	-0.0231965	-0.00619664	10	P1P2	0.79106	0.0106298	10	P1P2	0.479681	0.333473	10
ABHD3	P1P2	0.33643	-0.0554593	-0.0262381	10	P1P2	0.62566	-0.0227923	10	P1P2	0.244493	-0.412867	10
ABHD4	P1P2	0.8364	0.145879	0.0113181	10	P1P2	0.531431	-0.0173149	10	P1P2	0.989888	0.644026	10
ABHD5	P1P2	0.949574	0.0619733	0.00139261	10	P1P2	0.389278	0.0241241	10	P1P2	0.65893	0.40866	10
ABHD6	P1P2	0.456125	0.184523	0.0629068	10	P1P2	0.857381	-0.0151513	10	P1P2	0.456547	0.858774	10
ABHD8	P1P2	0.898174	0.0201637	0.000940421	10	P1P2	0.797065	0.0196343	10	P1P2	0.952639	0.228173	10
ABI1	P1P2	0.959034	-0.0378521	-0.000687613	10	P1P2	0.0404816	0.0480169	10	P1P2	0.643219	0.242369	10
ABI2	P1P2	0.12584	0.278553	0.250748	10	P1P2	0.059594	-0.0362085	10	P1P2	0.234834	0.900404	10
ABI3	P1P2	0.759518	0.0539913	0.00644989	10	P1P2	0.121829	0.0322387	10	P1P2	0.91795	0.326163	10
ABI3BP	P1P2	0.384007	0.0329608	0.0137005	10	P1P2	0.0196104	0.0431924	10	P1P2	0.817477	0.377562	10
ABL1	ENST00000372348.2	0.624625	0.077594	0.0158587	10	ENST00000372348.2	0.0602933	0.0513658	10	ENST00000372348.2	0.710678	0.768223	10
ABL2	P1	0.00389857	-0.19354	-0.466257	10	P2	0.171075	0.0397479	10	P1	0.00143168	-0.961705	10
ABLIM1	ENST00000277895.5	0.68015	0.153234	0.0256507	10	ENST00000277895.5	0.999062	-0.00660811	10	ENST00000277895.5	0.723341	0.786504	10
ABLIM2	P1P2	0.416998	0.172757	0.0656245	9	P1P2	0.249357	-0.0540893	9	P1P2	0.789049	0.712284	9
ABLIM3	P1P2	0.616034	-0.00367932	-0.000774113	10	P1P2	0.872172	-0.0166056	10	P1P2	0.500436	-0.044325	10
ABO	P1	0.48219	0.145149	0.0459804	10	P1	0.141761	0.0371815	10	P1	0.24342	0.763951	10
ABR	P1P2	0.922184	0.108155	0.00380514	10	P1P2	0.748494	0.00989088	10	P1P2	0.990358	0.437803	10
ABRA	P1P2	0.847664	0.0678831	0.0048724	10	P1P2	0.445162	0.0187405	10	P1P2	0.910118	0.00379216	10
ABRACL	P1P2	0.365319	-0.0250781	-0.0109673	10	P1P2	0.0271259	0.0681258	10	P1P2	0.684402	0.513233	10
ABT1	P1P2	0.261097	0.214669	0.125195	10	P1P2	0.241432	-0.0626316	10	P1P2	0.460031	0.736279	10
ABTB1	P1P2	0.881984	0.0772354	0.00421237	10	P1P2	0.592032	0.00726075	10	P1P2	0.992945	0.395289	10
ABTB2	P1P2	0.968382	0.0640277	0.00089339	10	P1P2	0.575084	-0.0333914	10	P1P2	0.805819	0.232125	10
ACAA1	P1P2	0.487201	0.0504651	0.0157599	10	P1P2	0.473601	0.0165144	10	P1P2	0.564253	0.610801	10
ACAA2	P1P2	0.166755	0.308306	0.239838	10	P1P2	0.661257	-0.00675126	10	P1P2	0.150323	1.29613	10
ACACA	P1P2	0.934335	0.218884	0.00645654	10	P1P2	0.047766	0.0344722	10	P1P2	0.641108	1.19264	10
ACACB	P1	0.172708	-0.0933462	-0.0711941	10	P1	0.0150636	0.0544672	10	P2	0.131152	0.920008	10
ACAD10	P1P2	0.791359	0.0101208	0.00102854	10	P1P2	0.951258	0.00192412	10	P1P2	0.769873	0.0782696	10
ACAD11	P1P2	0.8855	0.133474	0.00704897	10	P1P2	0.866851	0.0231666	10	P1P2	0.954752	1.01021	10
ACAD8	P1P2	0.260657	0.0654149	0.0381978	10	P1P2	0.738936	-0.0106425	10	P1P2	0.160523	0.329576	10
ACAD9	P1P2	0.900877	0.0653677	0.00296341	10	P1P2	0.709305	-0.0399351	10	P1P2	0.67684	0.036816	10
ACADL	P1P2	0.963057	0.0330501	0.000540304	10	P1P2	0.230512	-0.0335086	10	P1P2	0.770098	0.0832099	10
ACADM	P1P2	0.724515	0.109007	0.0152559	10	P1P2	0.257003	-0.0261071	10	P1P2	0.907548	0.36979	10
ACADS	P1P2	0.0322611	0.263036	0.392271	10	P1P2	0.540142	-0.0684227	10	P1P2	0.0651876	0.711635	10
ACADSB	P1P2	0.456125	0.190257	0.0648617	10	P1P2	0.173849	0.0359466	10	P1P2	0.246951	1.26705	10
ACADVL	P1P2	0.963885	0.0800347	0.00127853	10	P1P2	0.672263	-0.0115506	10	P1P2	0.79864	0.230276	10
ACAN	P1P2	0.979037	0.0218563	0.000201099	10	P1P2	0.846896	-0.00432799	10	P1P2	0.934576	0.276422	10
ACAP1	P1P2	0.0109059	0.344492	0.67601	10	P1P2	0.908518	-0.0159227	10	P1P2	0.014731	1.72382	10
ACAP2	P1P2	0.389136	-0.0115781	-0.00474584	10	P1P2	0.74894	-0.0106504	10	P1P2	0.215131	0.0275245	10
ACAP3	P1P2	0.73478	0.116415	0.0155813	10	P1P2	0.176186	0.0364869	10	P1P2	0.374414	0.676446	10
ACAT1	P1P2	0.743634	0.0446564	0.00574465	10	P1P2	0.996834	-0.0121686	10	P1P2	0.678134	0.257085	10
ACAT2	P1P2	0.346188	0.00280597	0.00129268	9	P1P2	0.754107	-0.0256676	9	P1P2	0.284538	-0.0102258	9
ACBD3	P1P2	0.0919964	-0.113247	-0.11735	10	P1P2	0.609823	-0.010947	10	P1P2	0.0602182	-0.509623	10
ACBD4	P2	0.0852332	-0.145013	-0.155075	9	P2	0.0446653	0.0390993	9	P2	0.282306	-0.25666	9
ACBD5	P1P2	0.375291	0.198334	0.0844172	9	P1P2	0.950838	0.0178425	9	P1P2	0.270408	1.02163	8
ACBD6	P1P2	0.996802	0.136285	0.000189593	10	P1P2	0.271716	0.0373025	10	P1P2	0.690693	0.752272	10
ACBD7	P1P2	0.62473	0.0931169	0.0190245	10	P1P2	0.979719	-0.00709742	10	P1P2	0.496178	0.547784	9
ACCS	P1P2	0.722975	0.0209891	0.00295688	9	P1P2	0.750697	-0.0100623	9	P1P2	0.781285	0.322345	9
ACCSL	ENST00000378832.1	0.115456	0.321666	0.30159	9	ENST00000378832.1	0.522316	-0.0326655	9	ENST00000378832.1	0.192548	1.10709	9
ACD	P1P2	0.626412	0.0168005	0.00341286	10	P1P2	0.555015	-0.027549	10	P1P2	0.519267	0.144799	10
ACE	P2	0.266554	0.025015	0.014364	10	P2	0.120243	0.0483181	10	P2	0.606601	0.199727	10
ACE2	P1P2	0.251843	0.204623	0.122543	8	P1P2	0.00453941	-0.136171	10	P1P2	0.752693	0.695918	10
ACER1	P1P2	0.299204	0.239213	0.125355	10	P1P2	0.326748	-0.0710815	10	P1P2	0.514026	0.704331	10
ACER2	P1P2	0.692158	0.148183	0.0236788	10	P1P2	0.435326	0.0147768	10	P1P2	0.646497	0.844581	10
ACER3	P1P2	0.645579	0.0393554	0.00747952	10	P1P2	0.0362417	0.0512542	10	P1P2	0.840336	0.345149	10
ACHE	P1	0.274363	-0.0251331	-0.0141167	10	P1	0.0629506	0.0516376	10	P2	0.419479	-0.097359	10
ACIN1	P1	0.120002	0.260415	0.239793	10	P2	0.0257196	-0.0701777	10	P1	0.187509	1.23349	10
ACKR2	P1P2	0.727746	0.024549	0.00338827	10	P1P2	0.978078	-0.0248838	10	P1P2	0.571946	0.0064522	10
ACKR3	P2	0.396204	0.31261	0.125694	9	P1	0.420344	-0.0370825	10	P2	0.378265	1.46644	9
ACKR4	P1P2	0.151023	0.00281378	0.00230999	8	P1P2	0.435446	-0.0192137	8	P1P2	0.0800307	-0.0361206	8
ACLY	P1P2	0.0363304	0.397295	0.571997	10	P1P2	0.26454	-0.0537222	10	P1P2	0.08484	1.56994	10
ACMSD	P1P2	0.884914	0.0265486	0.00140971	10	P1P2	0.363362	-0.0202548	10	P1P2	0.525977	0.0454732	10
ACN9	P1P2	0.0670947	-0.0610874	-0.0716746	10	P1P2	0.168517	0.00144873	10	P1P2	0.0925642	-0.559401	9
ACO1	P1P2	0.111112	-0.0890441	-0.0849694	10	P1P2	0.529024	-0.0272905	10	P1P2	0.0663778	-0.411211	10
ACO2	P1P2	0.755001	0.103685	0.012655	10	P1P2	0.433684	-0.0054778	10	P1P2	0.847487	0.466423	10
ACOT1	P1P2	0.128915	-0.0767733	-0.0683049	10	P1P2	0.373454	0.0368401	10	P1P2	0.276301	-0.306916	10
ACOT11	P2	0.0468166	0.315823	0.419918	10	P2	0.466107	-0.0440651	10	P2	0.126331	1.15106	10
ACOT12	P1P2	0.966252	0.233367	0.00347941	10	P1P2	0.732623	-0.00419564	10	P1P2	0.768746	0.855759	10
ACOT13	P1P2	0.512671	0.111364	0.0323134	10	P1P2	0.275062	0.0436174	10	P1P2	0.335092	0.724157	9
ACOT2	P1P2	0.377713	0.26199	0.110779	10	P1P2	0.0967679	-0.0524901	10	P1P2	0.669202	0.819197	10
ACOT4	P1P2	0.947683	0.150333	0.00350832	10	P1P2	0.321484	-0.0442115	10	P1P2	0.709361	0.614028	10
ACOT6	P1P2	0.947328	0.0325197	0.000764197	10	P1P2	0.290334	-0.0148229	10	P1P2	0.907664	0.0395211	10
ACOT7	P1P2	0.526048	0.227232	0.0633919	10	P1P2	0.735501	0.00175399	10	P1P2	0.426816	0.95655	10
ACOT8	P1P2	0.147794	0.188807	0.156774	9	P1P2	0.492948	-0.0409727	10	P1P2	0.252896	0.594993	10
ACOT9	P1P2	0.360062	0.112106	0.0497327	9	P1P2	0.783342	-0.00771313	9	P1P2	0.41878	0.421663	9
ACOX1	P1P2	0.831649	0.0487579	0.00390355	10	P1P2	0.763016	0.00497258	10	P1P2	0.93071	0.198401	10
ACOX2	P2	0.950165	0.139951	0.00310704	10	P1	0.316135	-0.00829141	10	P1	0.711447	0.467341	10
ACOX3	P1	0.0428146	-0.212122	-0.290269	10	P1	0.124472	0.0148364	10	P1	0.0718991	-0.579944	10
ACOXL	P1P2	0.741165	0.0556847	0.00724376	10	P1P2	0.920641	-0.0078653	10	P1P2	0.780937	0.48197	10
ACP1	P1P2	0.0985187	0.333331	0.335491	9	P1P2	0.737827	-0.0564419	10	P1P2	0.25492	1.74623	10
ACP2	P1P2	0.272996	-0.0906152	-0.0510928	10	P1P2	0.219893	0.0308465	10	P1P2	0.478857	-0.110777	10
ACP5	P1	0.266809	0.124663	0.0715318	10	P1	0.674516	-0.00793415	10	P1	0.199989	0.741423	10
ACP6	P1P2	0.924813	0.0349868	0.00118767	9	P1P2	0.292889	-0.0799058	10	P1P2	0.719148	-0.0604197	10
ACPL2	P1P2	0.066647	-0.152213	-0.179036	8	P1P2	0.89071	0.000654101	9	P1P2	0.0591872	-0.548245	9
ACPP	P1P2	0.103095	0.212921	0.210102	10	P1P2	0.253382	-0.0204245	10	P1P2	0.166356	0.951534	10
ACPT	ENST00000270593.1	0.412519	0.23268	0.0894787	10	ENST00000270593.1	0.636211	-0.0208864	10	ENST00000270593.1	0.480047	0.986988	10
ACR	P1P2	0.454064	-0.106536	-0.0365292	10	P1P2	0.272165	0.0218974	10	P1P2	0.545389	-0.37912	10
ACRBP	P1P2	0.198059	0.213684	0.150264	10	P1P2	0.840227	-0.0139371	10	P1P2	0.228395	0.789523	10
ACRC	P1P2	0.381336	0.156265	0.0654271	10	P1P2	0.421955	0.0119998	10	P1P2	0.206424	1.09139	9
ACRV1	P1P2	0.566219	-0.0135989	-0.00335915	10	P1P2	0.119125	-0.046176	10	P1P2	0.254367	-0.14433	10
ACSBG1	P1P2	0.775846	0.116446	0.0128351	10	P1P2	0.102077	0.029486	10	P1P2	0.880044	1.0304	10
ACSBG2	P1P2	0.612591	-0.010906	-0.00232112	10	P1P2	0.0288554	0.0373673	10	P1P2	0.88237	0.142446	10
ACSF2	P1P2	0.309406	0.301913	0.153816	10	P1P2	0.566299	-0.0491145	10	P1P2	0.313712	1.24788	10
ACSF3	P1P2	0.44084	0.185817	0.0660986	10	P1P2	0.498153	-0.0291586	10	P1P2	0.616419	0.902758	10
ACSL1	P1P2	0.305887	0.236629	0.121731	10	P1P2	0.340336	-0.0295315	10	P1P2	0.303697	0.610613	10
ACSL3	P1P2	0.288958	0.207712	0.111991	10	P1P2	0.801833	-0.00847243	10	P1P2	0.266285	1.39059	10
ACSL4	P1P2	0.14036	0.256013	0.218316	10	P1P2	4.46732e-05	-0.156831	10	P1P2	0.517835	-0.14245	10
ACSL5	P1	0.885512	0.120667	0.00637188	9	P1	0.149111	0.0512025	9	P1	0.605	0.965844	9
ACSL6	P1	0.0336255	-0.0913542	-0.134595	10	P1	0.312601	-0.0455217	10	P1	0.010789	-0.566442	10
ACSM1	P1P2	0.401183	0.0454761	0.0180385	10	P1P2	0.931965	-0.00940453	10	P1P2	0.41188	0.27074	10
ACSM2A	P1P2	0.878354	0.0229	0.00128997	10	P1P2	0.504231	0.00375727	10	P1P2	0.956396	0.447737	10
ACSM2B	P1P2	0.782338	0.0257938	0.00274977	10	P1P2	0.130192	0.0329322	10	P1P2	0.502406	0.499778	10
ACSM3	P1P2	0.923363	0.136394	0.004723	10	P1P2	0.228689	0.0421946	10	P1P2	0.726214	1.03577	10
ACSM4	ENST00000399422.4	0.408214	-0.0266151	-0.0103562	10	ENST00000399422.4	0.845055	-0.0039163	10	ENST00000399422.4	0.404363	0.0400156	10
ACSM5	P1P2	0.410236	0.245494	0.0949976	10	P1P2	0.952311	-0.0309258	10	P1P2	0.511558	1.07985	10
ACSS1	P1P2	0.69098	-0.00628558	-0.00100905	9	P1P2	0.523079	-0.0487425	10	P1P2	0.809472	0.190966	10
ACSS2	P1P2	0.910522	0.0887998	0.003615	10	P1P2	0.579601	-0.0038411	10	P1P2	0.813243	0.610288	10
ACSS3	P1P2	0.749639	0.125381	0.0156912	9	P1P2	0.166273	-0.0448618	9	P1P2	0.799114	0.480844	9
ACTA1	P2	0.534414	0.128301	0.0349135	10	P1	0.12967	-0.093989	10	P1	0.247072	0.163736	10
ACTA2	P1	0.00892978	0.296351	0.60727	10	P1	0.358803	-0.0471595	10	P1	0.0113201	1.60055	10
ACTB	P1P2	0.507427	0.106121	0.031266	10	P1P2	0.105164	-0.0678358	10	P1P2	0.90673	0.243457	10
ACTBL2	P1P2	0.512862	0.0548508	0.0159067	10	P1P2	0.240607	0.013609	10	P1P2	0.614761	0.419281	10
ACTC1	P1P2	0.0211802	0.370102	0.619576	10	P1P2	0.626597	-0.0558176	10	P1P2	0.0555859	1.94127	10
ACTG1	P1P2	0.594751	-0.0151178	-0.00341156	9	P1P2	0.130378	-0.0676042	10	P1P2	0.299559	-0.158674	10
ACTG2	P2	0.431567	0.100921	0.0368313	10	P1	0.2645	-0.0277846	9	P2	0.333945	0.722646	10
ACTL10	P1P2	0.308207	0.0137137	0.00700985	10	P1P2	0.144976	-0.0278621	10	P1P2	0.1202	-0.267551	10
ACTL6A	P1P2	0.195506	0.26587	0.188459	9	P1P2	0.00168702	-0.191575	10	P1P2	0.774834	0.244777	10
ACTL6B	P1P2	0.4243	0.221899	0.082619	10	P1P2	0.297839	-0.0266467	10	P1P2	0.551774	0.95061	10
ACTL7A	P1P2	0.636124	0.180993	0.0355576	10	P1P2	0.818463	-0.0247761	10	P1P2	0.584743	0.742921	10
ACTL7B	P1P2	0.429224	0.207155	0.0760915	10	P1P2	0.0693859	-0.0793679	10	P1P2	0.934811	0.729011	10
ACTL8	P1P2	0.603556	0.034792	0.00762929	10	P1P2	0.564212	-0.00302059	10	P1P2	0.688738	0.394143	10
ACTL9	P1P2	0.629256	0.0016815	0.000338271	10	P1P2	0.619221	-0.0270902	10	P1P2	0.390554	0.0779816	10
ACTN1	P1P2	0.277175	-0.00198145	-0.00110416	10	P1P2	0.501982	-0.00082705	10	P1P2	0.478857	0.11394	10
ACTN2	P1P2	0.843828	0.0717762	0.00529321	10	P1P2	0.541601	0.027903	10	P1P2	0.904161	0.457161	10
ACTN3	P1P2	0.906521	0.180219	0.00768128	10	P1P2	0.719392	-0.00635222	10	P1P2	0.929421	0.550075	10
ACTN4	P1P2	0.927373	0.0466172	0.00152652	10	P1P2	0.118119	0.036009	10	P1P2	0.665557	0.439845	10
ACTR10	P1P2	0.205521	-0.0916858	-0.0630013	9	P1P2	0.97386	-0.0314241	10	P1P2	0.206267	-0.253695	10
ACTR1A	P1P2	0.342132	0.366895	0.170902	10	P1P2	0.316419	-0.0537093	10	P1P2	0.385854	1.00153	10
ACTR1B	P1P2	0.0429518	-0.134909	-0.184423	10	P1P2	0.163042	0.0392233	10	P1P2	0.130439	-0.554803	10
ACTR2	P1P2	0.715961	-0.0120643	-0.00175066	10	P1P2	0.562029	-0.0476194	10	P1P2	0.388951	-0.289792	9
ACTR3	P1P2	0.497212	0.173715	0.0527153	10	P1P2	0.430928	-0.0279037	10	P1P2	0.569843	0.51978	10
ACTR3B	P1P2	0.0948381	-0.132663	-0.135716	10	P1P2	0.407413	0.0255453	10	P1P2	0.187016	-0.44414	10
ACTR3C	P1P2	0.387911	0.12081	0.0496851	10	P1P2	0.782582	-0.0258573	10	P1P2	0.491576	0.504269	10
ACTR5	P1P2	0.237854	0.172352	0.107494	9	P1P2	6.35308e-05	-0.190494	10	P1P2	0.217155	-0.0453115	10
ACTR6	P1P2	0.0281175	0.344312	0.534036	10	P1P2	0.303052	-0.0859291	10	P1P2	0.0575335	1.25149	10
ACTR8	P1P2	0.70553	0.0533676	0.00808437	8	P1P2	0.00833158	-0.200783	10	P1P2	0.0371025	-0.872746	10
ACTRT1	P1P2	0.499661	0.0651271	0.0196244	10	P1P2	0.966713	-0.00191799	10	P1P2	0.528288	0.307493	10
ACTRT2	P1P2	0.0634142	-0.11681	-0.139916	10	P1P2	0.839767	-0.00872061	10	P1P2	0.0399776	-0.37163	10
ACTRT3	P1P2	0.33561	-0.0720676	-0.034172	10	P1P2	0.259913	-0.0565213	10	P1P2	0.0993913	-0.521952	10
ACVR1	P1P2	0.923717	0.0700836	0.00241517	10	P1P2	0.0617124	-0.0602713	10	P1P2	0.40761	-0.0447923	10
ACVR1B	P1P2	0.885382	0.112705	0.00595863	10	P1P2	0.1547	-0.0594631	10	P1P2	0.605468	0.314349	10
ACVR1C	P1P2	0.136644	-0.132959	-0.114931	10	P1P2	0.0736845	0.0460568	10	P1P2	0.341147	-0.160729	10
ACVR2A	P1P2	0.656701	0.0599199	0.0109433	10	P1P2	0.0189505	0.0592008	10	P1P2	0.924503	0.545663	10
ACVR2B	P1P2	0.524546	0.0307644	0.0086207	9	P1P2	0.00765692	-0.09952	10	P1P2	0.154846	-0.369297	10
ACVRL1	P1P2	0.967672	0.104661	0.0014937	10	P1P2	0.999883	-0.024661	10	P1P2	0.828027	0.34874	10
ACY1	P1P2	0.239039	-0.0803841	-0.0499613	10	P1P2	0.424593	0.0146119	10	P1P2	0.353623	-0.178977	10
ACY3	P1	0.82309	0.137409	0.0116183	10	P2	0.162644	0.0313545	10	P2	0.615383	0.988687	10
ACYP1	P2	0.921241	0.0865119	0.00308214	10	P2	0.212149	-0.0451621	10	P1	0.454856	-0.017025	10
ACYP2	P1P2	0.345386	0.104977	0.0484672	10	P1P2	0.730633	-0.0511998	10	P1P2	0.35669	0.196132	10
ADA	P1P2	0.800294	0.144921	0.0140212	10	P1P2	0.219397	-0.00910684	10	P1P2	0.883999	0.532779	10
ADAD1	P1P2	0.142005	-0.147835	-0.125319	10	P1P2	0.484644	0.0184526	10	P1P2	0.182381	-0.209758	10
ADAD2	P1P2	0.83756	0.025618	0.00197218	10	P1P2	0.924258	0.000562159	10	P1P2	0.848526	0.211053	10
ADAL	P1P2	0.511106	0.17295	0.0504128	8	P1P2	0.0233091	-0.0721967	10	P1P2	0.863679	0.569644	10
ADAM10	P1P2	0.722067	0.0233857	0.00330725	10	P1P2	0.488602	-0.0779918	10	P1P2	0.715404	-0.0457036	10
ADAM11	P1P2	0.546296	0.159867	0.0419765	10	P1P2	0.817207	-0.0187397	10	P1P2	0.57858	0.662641	10
ADAM12	P1P2	0.653699	0.143826	0.0265536	10	P1P2	0.476872	-0.0205127	10	P1P2	0.923216	0.746925	10
ADAM15	P1P2	0.0181518	-0.176944	-0.308073	10	P1P2	0.606944	-0.0454225	10	P1P2	0.00630528	-0.871191	10
ADAM17	P1P2	0.362182	0.00914678	0.0040344	10	P1P2	0.730191	0.021867	10	P1P2	0.371489	0.525111	10
ADAM18	P1P2	0.46542	-0.0477312	-0.0158542	10	P1P2	0.691342	0.00370312	10	P1P2	0.500155	0.186049	10
ADAM19	P1P2	0.413451	0.0985404	0.0377977	10	P1P2	0.297635	-0.0171127	10	P1P2	0.572147	0.680378	10
ADAM2	P1P2	0.579557	0.0711326	0.0168516	10	P1P2	0.900486	-0.0129558	10	P1P2	0.539236	0.468673	10
ADAM20	P1P2	0.0511112	0.339485	0.43844	10	P1P2	0.822805	-0.0155041	10	P1P2	0.0476211	1.44921	10
ADAM21	P1P2	0.771755	0.0237436	0.00267165	10	P1P2	0.951024	-0.0135534	10	P1P2	0.761886	0.130503	10
ADAM22	P1P2	0.34683	0.17251	0.0793347	10	P1P2	0.277786	0.0045853	10	P1P2	0.259313	0.809063	10
ADAM23	P1P2	0.437405	-0.0235931	-0.00847267	9	P1P2	0.495547	-0.0528006	10	P1P2	0.248881	-0.087582	10
ADAM28	P1P2	0.146492	0.00890977	0.00743241	10	P1P2	0.134652	0.0526233	10	P1P2	0.356921	0.26518	10
ADAM29	P1P2	0.417788	0.19848	0.0752327	10	P1P2	0.432391	0.0100623	10	P1P2	0.24599	1.25923	10
ADAM30	P1P2	0.503631	0.143447	0.0427311	10	P1P2	0.76044	0.00971312	10	P1P2	0.425274	0.897514	10
ADAM32	P1P2	0.668979	0.0480404	0.00838724	10	P1P2	0.895951	-0.0255779	10	P1P2	0.845064	0.269186	10
ADAM33	P1P2	0.639729	0.00163442	0.000317083	10	P1P2	0.852078	-0.0211558	10	P1P2	0.478857	0.0874365	10
ADAM7	P1P2	0.0269788	0.28998	0.454972	10	P1P2	0.808315	0.0159061	10	P1P2	0.0136278	1.34835	10
ADAM8	P1P2	0.764497	0.114318	0.0133323	10	P1P2	0.857842	-0.00171956	10	P1P2	0.777432	0.91893	10
ADAM9	P1P2	0.60428	0.092882	0.020319	10	P1P2	0.684312	-0.0162086	10	P1P2	0.659356	0.694133	10
ADAMDEC1	P1P2	0.0125404	-0.181401	-0.344969	10	P1P2	0.278241	0.0228797	10	P1P2	0.0299425	-0.722427	10
ADAMTS1	P2	0.119437	0.188663	0.17411	10	P2	0.48107	-0.00963313	10	P1	0.126917	1.29497	10
ADAMTS10	P1P2	0.961519	0.0765548	0.00130466	10	P1P2	0.407663	-0.0462636	10	P1P2	0.762672	-0.0458	10
ADAMTS12	P1P2	0.369818	-0.0312386	-0.0134954	10	P1P2	0.518214	0.0170653	10	P1P2	0.469301	0.166801	10
ADAMTS13	P1P2	0.364533	0.234661	0.102843	10	P1P2	0.752507	-0.0214491	10	P1P2	0.674793	1.15677	10
ADAMTS14	P1P2	0.299204	0.178502	0.0935411	10	P1P2	0.0568445	-0.082626	10	P1P2	0.707168	0.317066	10
ADAMTS15	P1P2	0.936814	0.158094	0.00448143	10	P1P2	0.597323	0.00800308	10	P1P2	0.812672	0.674327	10
ADAMTS16	P1	0.00575278	0.312873	0.700874	9	P1	0.12589	0.0218045	9	P1	0.00164495	1.43252	8
ADAMTS17	P1P2	0.469605	0.0504089	0.0165476	10	P1P2	0.424508	0.0223545	10	P1P2	0.72544	0.163152	10
ADAMTS18	P1P2	0.489904	-0.0323748	-0.0100326	10	P1P2	0.610646	-0.00696362	10	P1P2	0.641952	-0.152193	10
ADAMTS19	P1P2	0.87227	-0.0261547	-0.00155226	10	P1P2	0.491837	-0.00895288	10	P1P2	0.903694	0.274177	10
ADAMTS2	P1P2	0.73825	0.147293	0.0194126	10	P1P2	0.110341	-0.0419332	10	P1P2	0.927079	0.613109	10
ADAMTS20	P1P2	0.451384	0.0195028	0.00673734	10	P1P2	0.161893	-0.0569251	10	P1P2	0.259188	-0.252148	10
ADAMTS3	P1P2	0.831765	0.0184009	0.00147206	10	P1P2	0.556888	-0.0118993	10	P1P2	0.871448	-0.0320497	10
ADAMTS4	P1P2	0.933768	0.0287979	0.000857051	9	P1P2	0.220834	-0.0892869	10	P1P2	0.502218	0.251856	10
ADAMTS5	P1P2	0.851503	0.0497721	0.00347479	10	P1P2	0.447355	-0.0379194	10	P1P2	0.61995	0.0456327	10
ADAMTS6	P1P2	0.260468	0.300481	0.175555	10	P1P2	0.868701	-0.0332306	10	P1P2	0.179737	1.21628	10
ADAMTS7	P1P2	0.171868	-0.0121137	-0.00926462	10	P1P2	0.019123	0.0405163	10	P1P2	0.597773	0.166799	10
ADAMTS8	P1P2	0.100179	-0.0376416	-0.0376123	10	P1P2	0.879816	-0.0128748	10	P1P2	0.0934287	-0.150665	10
ADAMTS9	P1P2	0.202755	-0.106822	-0.0740309	10	P1P2	0.110243	0.0330589	10	P1P2	0.445132	-0.286063	10
ADAMTSL1	P1P2	0.384493	0.0413179	0.0171515	10	P1P2	0.838619	0.00358714	10	P1P2	0.467222	0.280442	10
ADAMTSL2	P1P2	0.12215	-0.101647	-0.0928145	9	P1P2	0.434131	0.00291341	9	P1P2	0.148477	-0.498614	9
ADAMTSL3	P1P2	0.847547	0.0860564	0.00618195	10	P1P2	0.265927	-0.004231	10	P1P2	0.86994	0.459856	10
ADAMTSL4	P1P2	0.164883	0.223222	0.174744	9	P1P2	0.716986	-0.0133278	9	P1P2	0.144546	0.92096	9
ADAMTSL5	P1P2	0.387893	-0.00952492	-0.00391748	9	P1P2	0.0920503	0.00221935	10	P1P2	0.854997	0.156725	10
ADAP1	P1P2	0.207158	0.211578	0.144655	10	P1P2	0.480156	-0.0136901	10	P1P2	0.297435	1.05109	10
ADAP2	P1P2	0.902405	0.0632892	0.0028226	10	P1P2	0.247687	-0.0582607	10	P1P2	0.435702	0.0634255	10
ADAR	P2	0.458642	0.143554	0.0485969	10	P1	0.00605374	-0.133911	9	P1	0.0574731	-0.274204	9
ADARB1	P1P2	0.369897	-0.0359353	-0.0155211	10	P1P2	0.761671	0.00543655	10	P1P2	0.475569	-0.165428	10
ADARB2	ENST00000381312.1	0.994006	0.0180339	4.70856e-05	9	ENST00000381312.1	0.417215	-0.0416754	10	ENST00000381312.1	0.921694	0.0385647	10
ADAT1	P1P2	0.319548	0.030639	0.0151805	10	P1P2	0.139386	-0.0342848	10	P1P2	0.11444	-0.185645	10
ADAT2	P1P2	0.654889	0.105628	0.0194179	9	P1P2	0.0568828	-0.0979989	10	P1P2	0.377257	-0.0741339	9
ADAT3	P2	0.469933	0.117669	0.0385911	9	P1	0.215179	-0.0447498	10	P1	0.921226	0.327138	10
ADC	P1P2	0.239691	0.158143	0.0981039	10	P1P2	0.748383	-0.020585	10	P1P2	0.265842	0.726059	10
ADCK1	P1P2	0.357587	0.292128	0.13047	10	P1P2	0.687553	0.010607	10	P1P2	0.193246	0.946761	10
ADCK2	P1P2	0.316956	0.195544	0.0975765	10	P1P2	0.236683	0.0214265	10	P1P2	0.152382	1.06129	10
ADCK3	P1P2	0.523919	0.0683812	0.019197	10	P1P2	0.976203	-0.00942331	10	P1P2	0.520319	0.63527	10
ADCK4	P1P2	0.669953	-0.0456104	-0.0079342	10	P1P2	0.795591	-0.00708914	10	P1P2	0.648827	-0.0999732	10
ADCK5	P1P2	0.139523	-0.0398901	-0.0341201	10	P1P2	0.343097	-0.0113083	10	P1P2	0.0778655	-0.383384	10
ADCY1	P1P2	0.727077	0.0604138	0.00836246	10	P1P2	0.353747	-0.0278623	10	P1P2	0.55266	0.505926	10
ADCY10	P1P2	0.216834	0.264028	0.175281	9	P1P2	0.619769	0.00303281	9	P1P2	0.193557	1.32231	9
ADCY2	P1P2	0.661796	-0.0350089	-0.00627624	9	P1P2	0.623372	-0.0843561	10	P1P2	0.357229	-0.0420746	10
ADCY3	P1P2	0.281861	-0.0731227	-0.0402149	10	P1P2	0.15107	-0.0180388	10	P1P2	0.522904	-0.0547252	10
ADCY4	P1P2	0.960572	0.114536	0.00200094	10	P1P2	0.683125	-0.00623047	10	P1P2	0.884813	0.490003	10
ADCY5	P1P2	0.582914	0.0925914	0.021703	10	P1P2	0.855651	0.017765	10	P1P2	0.758855	0.167315	10
ADCY6	P1P2	0.592013	0.0609321	0.0138723	10	P1P2	0.499459	0.0229634	10	P1P2	0.760988	0.381604	10
ADCY7	P1P2	0.135396	-0.125221	-0.108741	10	P1P2	0.804333	0.00735099	10	P1P2	0.167578	-0.204826	10
ADCY8	P1P2	0.69929	0.0159761	0.00248177	10	P1P2	0.467186	-0.0175181	10	P1P2	0.524727	0.0789405	10
ADCY9	P1P2	0.391101	-0.030755	-0.0125392	10	P1P2	0.628264	0.00609434	10	P1P2	0.424761	-0.0125951	10
ADCYAP1	P1P2	0.532365	0.145119	0.0397323	10	P1P2	0.36406	-0.0293652	10	P1P2	0.808216	0.632494	10
ADCYAP1R1	P1P2	0.0114703	-0.189271	-0.367266	10	P1P2	0.179687	0.0431651	10	P1P2	0.0229206	-0.898779	9
ADD1	P1P2	0.32027	0.0681407	0.0336945	10	P1P2	0.94342	-0.00375934	10	P1P2	0.304946	0.571923	10
ADD2	P1P2	0.322952	0.200039	0.0981915	10	P1P2	0.78168	0.0129407	10	P1P2	0.398904	0.780552	10
ADD3	P1P2	0.33776	-0.102829	-0.0484727	9	P1P2	0.572281	-0.0151514	10	P1P2	0.235415	-0.288603	10
ADGB	P1P2	0.205661	-0.0681744	-0.0468255	8	P1P2	0.0903051	-0.0803521	10	P1P2	0.0612922	-0.455491	10
ADH1A	P1P2	0.886086	0.102972	0.00540852	10	P1P2	0.673872	0.0263647	10	P1P2	0.792386	0.714039	10
ADH1B	P1P2	0.100578	-0.0778248	-0.0776299	10	P1P2	0.954418	-0.0164914	10	P1P2	0.0665306	-0.36656	10
ADH1C	P1P2	0.496554	0.292718	0.088996	10	P1P2	0.474281	-0.0252359	9	P1P2	0.618599	1.15639	10
ADH4	P1P2	0.129029	-0.147722	-0.131371	8	P1P2	0.0709996	0.0167201	9	P1P2	0.522903	-0.0259145	9
ADH5	P1P2	0.118629	-0.125035	-0.115758	10	P1P2	0.923325	-0.0180763	10	P1P2	0.0760201	-0.443729	10
ADH6	P1P2	0.366421	-0.0169694	-0.00739901	10	P1P2	0.0272384	-0.0838955	10	P1P2	0.0730709	-0.261414	10
ADH7	P1P2	0.462792	0.156069	0.052223	10	P1P2	0.84333	0.00893264	10	P1P2	0.322715	0.932487	10
ADHFE1	P1P2	0.706622	0.112196	0.0169207	9	P1P2	0.307174	0.00587941	9	P1P2	0.499232	0.953666	9
ADI1	P1P2	0.140121	0.156559	0.133623	10	P1P2	0.156325	0.0342923	10	P1P2	0.0602987	1.16291	10
ADIG	P1P2	0.53032	0.0656926	0.0180958	10	P1P2	0.0642939	-0.0601073	10	P1P2	0.210746	-0.181262	10
ADIPOQ	P1P2	0.784068	0.0640074	0.00676215	6	P1P2	0.298016	-0.0986638	8	P1P2	0.753666	0.171991	8
ADIPOR1	P1P2	0.81928	0.0758503	0.0065662	10	P1P2	0.0568828	-0.016325	10	P1P2	0.799778	0.0353849	10
ADIPOR2	P1P2	0.670169	0.188805	0.0328172	10	P1P2	0.0540546	-0.0448419	10	P1P2	0.937214	0.634491	9
ADIRF	P1P2	0.572083	-0.0177717	-0.00431037	9	P1P2	0.812286	-0.0140605	9	P1P2	0.459947	-0.161767	9
ADK	P1	0.823397	0.0659683	0.0055671	9	P2	0.0613041	0.0455911	10	P1	0.443815	-0.00871574	10
ADM	P1P2	0.415743	-0.0283343	-0.0108003	10	P1P2	0.197103	0.0508376	10	P1P2	0.643922	0.289149	9
ADM2	P1P2	0.83814	0.100093	0.00767548	10	P1P2	0.131465	0.0201249	10	P1P2	0.853725	0.561316	10
ADM5	P1P2	0.450728	-0.00350857	-0.00121427	9	P1P2	0.0524621	0.0430492	9	P1P2	0.807647	0.520518	9
ADNP	P1P2	0.0627404	0.347065	0.417329	10	P1P2	0.00948797	-0.122669	10	P1P2	0.273063	0.768028	10
ADNP2	P1P2	0.315989	0.264069	0.132121	9	P1P2	0.367019	-0.0370097	10	P1P2	0.417444	1.05721	10
ADO	P1P2	0.539701	-0.0392393	-0.0105101	10	P1P2	0.327691	0.0125379	10	P1P2	0.635317	0.250314	10
ADORA1	P1P2	0.488598	0.109418	0.0340342	10	P1P2	0.222891	0.0266178	10	P1P2	0.346027	0.967745	10
ADORA2A	P1P2	0.982352	0.101852	0.000787588	10	P1P2	0.920991	0.0121739	10	P1P2	0.931061	0.524603	10
ADORA2B	P1P2	0.261412	0.193328	0.112647	10	P1P2	0.741377	-0.0123565	10	P1P2	0.20978	0.849193	10
ADORA3	P1	0.0112016	-0.232633	-0.453801	10	P1	0.859458	0.0060843	10	P1	0.00785215	-0.98141	9
ADPGK	P1P2	0.391347	0.0124345	0.00506629	10	P1P2	0.953598	-0.0137542	10	P1P2	0.441364	-0.0417943	10
ADPRH	P1P2	0.315022	-0.0478789	-0.0240189	10	P1P2	0.384279	-0.041345	10	P1P2	0.12236	-0.201304	10
ADPRHL1	P2	0.171821	0.0472447	0.0361386	10	P2	0.180403	0.0247117	10	P2	0.323509	0.361854	10
ADPRHL2	P1P2	0.0793812	0.31444	0.345973	10	P1P2	0.128374	-0.0802479	10	P1P2	0.232923	1.00532	10
ADPRM	P1P2	0.938623	0.183682	0.0050529	9	P1P2	0.14057	-0.0777232	10	P1P2	0.681049	0.607309	10
ADRA1A	P1P2	0.60791	0.0786996	0.0170118	10	P1P2	0.0907529	0.0567769	10	P1P2	0.93528	0.486204	10
ADRA1B	P1P2	0.48219	0.0460497	0.0145877	10	P1P2	0.579902	-0.0277261	10	P1P2	0.447155	0.157429	10
ADRA1D	P1P2	0.897117	0.000917618	4.32665e-05	10	P1P2	0.632546	-0.0174073	10	P1P2	0.92263	0.385417	10
ADRA2A	P1P2	0.739707	0.0255339	0.00334342	10	P1P2	0.615495	0.0116783	10	P1P2	0.83021	0.35608	10
ADRA2B	P1P2	0.988512	0.0712685	0.000357629	9	P1P2	0.743932	-0.0269464	10	P1P2	0.930827	0.265434	10
ADRA2C	P1P2	0.76869	0.116401	0.0132986	10	P1P2	0.311546	-0.0793633	10	P1P2	0.848757	0.0402808	10
ADRB1	P1P2	0.990169	0.0270615	0.000116113	10	P1P2	0.114296	-0.03262	10	P1P2	0.663951	0.0202807	10
ADRB2	P1P2	0.936224	0.055681	0.00159361	10	P1P2	0.731739	-0.0219153	10	P1P2	0.694499	0.0328468	10
ADRB3	P1P2	0.277044	0.15256	0.0850448	10	P1P2	0.474236	-0.011672	10	P1P2	0.330418	0.665046	10
ADRBK1	P1P2	0.0578146	0.312887	0.387342	10	P1P2	0.37235	-0.017364	10	P1P2	0.0778158	1.42031	10
ADRBK2	P1P2	0.925014	0.038431	0.00130096	10	P1P2	0.456454	0.0188678	10	P1P2	0.89856	0.399524	10
ADRM1	P1P2	0.322734	-0.0930262	-0.0456904	10	P1P2	0.941549	0.00294969	10	P1P2	0.339356	-0.479854	10
ADSL	P1P2	0.235386	0.31788	0.199698	10	P1P2	0.00275147	-0.14964	10	P1P2	0.711886	0.205699	10
ADSS	P1P2	0.380435	-0.0638945	-0.0268178	8	P1P2	0.00589563	-0.158331	10	P1P2	0.0219231	-0.493251	10
ADSSL1	P1P2	0.947565	0.0596668	0.00139568	10	P1P2	0.923792	-0.0315562	10	P1P2	0.885278	0.201311	10
ADTRP	P1P2	0.13144	0.269146	0.237191	10	P1P2	0.678062	0.0102866	10	P1P2	0.0544107	1.10176	10
AEBP1	P1P2	0.572971	-0.0745539	-0.0180322	10	P1P2	0.287195	0.0119625	10	P1P2	0.601358	0.139066	10
AEBP2	P1P2	0.741838	0.0734054	0.00952003	10	P1P2	0.016835	-0.0585122	10	P1P2	0.78071	0.163744	10
AEN	P1P2	0.0895313	-0.163451	-0.171301	10	P1P2	0.318196	0.0382782	10	P1P2	0.205897	-0.328141	10
AES	P1P2	0.977261	0.129267	0.00129132	10	P1P2	0.227612	-0.0296875	10	P1P2	0.687111	0.382304	10
AFAP1	P1P2	0.493426	0.0793125	0.0243314	9	P1P2	0.318688	0.0193461	9	P1P2	0.570438	0.513187	9
AFAP1L1	P1P2	0.90985	0.0355452	0.00145842	8	P1P2	0.0697237	0.0409001	8	P1P2	0.650492	0.284993	8
AFAP1L2	P1P2	0.590577	0.272208	0.0622602	10	P1P2	0.189359	-0.0785781	10	P1P2	0.827223	0.711781	10
AFF1	P1P2	0.257025	0.0382517	0.0225694	10	P1P2	0.233977	0.023381	9	P1P2	0.49139	0.443524	10
AFF2	P1P2	0.982234	0.0145902	0.000113585	10	P1P2	0.441578	0.027477	10	P1P2	0.712765	0.150216	10
AFF3	P1P2	0.240701	-0.0890519	-0.0550806	10	P1P2	0.0337534	-0.0731521	10	P1P2	0.0386418	-0.730083	10
AFF4	P1P2	0.989932	0.0442785	0.000194587	10	P1P2	0.468808	-0.0265808	10	P1P2	0.590936	0.236434	10
AFG3L2	P1P2	0.47684	0.141048	0.0453649	10	P1P2	1.56369e-06	-0.174438	10	P1P2	0.0674311	-0.630071	10
AFM	P1P2	0.205825	-0.052414	-0.0359823	10	P1P2	0.514605	-0.0140563	10	P1P2	0.150867	-0.281116	10
AFMID	P1P2	0.964477	0.0151179	0.000237474	10	P1P2	0.234826	0.0410067	10	P1P2	0.698858	0.190122	10
AFP	P2	0.0397733	-0.17796	-0.249217	10	P2	0.685392	0.0131158	10	P2	0.0340927	-0.633024	10
AFTPH	P1P2	0.358363	0.235826	0.105102	10	P1P2	0.0406833	-0.0550363	10	P1P2	0.562661	0.784928	10
AGA	P1P2	0.524209	-0.0560275	-0.0157155	10	P1P2	0.705153	-0.0306329	10	P1P2	0.240928	-0.422285	10
AGAP1	P1P2	0.722747	0.0638944	0.00900997	8	P1P2	0.293299	-0.0647947	9	P1P2	0.324452	0.197344	9
AGAP10	ENST00000413193.2	0.896647	0.0715188	0.00338844	10	ENST00000413193.2	0.548141	-0.0264424	10	ENST00000413193.2	0.746882	0.0752057	10
AGAP11	P1P2	0.751538	0.0969051	0.012021	9	P1P2	0.424167	-0.02561	10	P1P2	0.836651	0.376451	10
AGAP2	P1P2	0.453349	0.0332361	0.0114189	10	P1P2	0.7271	0.00314	10	P1P2	0.619535	0.0950977	10
AGAP3	P1P2	0.973235	0.0518888	0.00061136	10	P1P2	0.251129	0.0224319	10	P1P2	0.789888	0.358308	10
AGAP9	ENST00000453919.1	0.896647	0.0715188	0.00338844	10	ENST00000453919.1	0.548141	-0.0264424	10	ENST00000453919.1	0.746882	0.0752057	10
AGBL1	ENST00000441037.2	0.0674945	-0.0952265	-0.111485	10	ENST00000421325.2	0.884222	7.75099e-05	10	ENST00000441037.2	0.0776174	-0.455216	10
AGBL2	P1P2	0.183664	0.240134	0.176733	10	P1P2	0.609823	-0.0462358	10	P1P2	0.333724	1.02649	10
AGBL3	P1P2	0.892932	0.0463947	0.00228177	9	P1P2	0.32041	0.0238312	10	P1P2	0.665005	0.453246	9
AGBL4	P1P2	0.189456	-0.0732815	-0.0529453	10	P1P2	0.311195	0.0210765	10	P1P2	0.270812	-0.214939	10
AGBL5	P2	0.350954	0.130808	0.0594849	10	P2	0.0091921	-0.0455433	10	P2	0.758182	0.515367	10
AGER	P1P2	0.109781	-0.114146	-0.10952	9	P1P2	0.740846	-0.0360071	9	P1P2	0.0409963	-0.617644	9
AGFG1	P1P2	0.217663	0.268083	0.177529	10	P1P2	0.00745188	-0.0843131	10	P1P2	0.851991	1.09608	10
AGFG2	P1P2	0.896522	0.105916	0.00502456	9	P1P2	0.976789	-0.0233842	10	P1P2	0.866692	0.527111	10
AGGF1	P1P2	0.749029	0.0616139	0.00773262	10	P1P2	0.172643	-0.03901	10	P1P2	0.971667	0.0739708	10
AGK	P1P2	0.454778	0.0589618	0.0201767	9	P1P2	0.0566536	-0.0957208	10	P1P2	0.828602	0.21418	10
AGL	P1P2	0.762006	0.127033	0.0149951	10	P1P2	0.791512	-0.0146624	10	P1P2	0.705307	0.375604	10
AGMAT	P1P2	0.247432	-0.0224483	-0.0136159	10	P1P2	0.549218	-0.0400593	10	P1P2	0.164827	-0.510897	10
AGMO	P1P2	0.726965	0.0683477	0.00946522	10	P1P2	0.356499	-0.0377264	10	P1P2	0.50683	0.368915	10
AGO1	P1P2	0.170474	0.253172	0.194523	10	P1P2	0.117498	0.00411863	10	P1P2	0.0854009	1.01828	10
AGO2	P1P2	0.458912	0.143242	0.0484547	10	P1P2	0.112821	-0.0381812	10	P1P2	0.763908	0.634808	10
AGO3	P1P2	0.0670947	0.348669	0.409098	10	P1P2	0.175108	-0.0382007	10	P1P2	0.0810736	1.42608	10
AGO4	P1P2	0.842434	0.101098	0.00752818	10	P1P2	0.957227	0.00603713	10	P1P2	0.683536	0.553613	10
AGPAT1	P1	0.482468	-0.0260559	-0.00824752	10	P2	0.565503	0.0102926	10	P1	0.505887	-0.0353662	10
AGPAT2	P1P2	0.226145	-0.0456209	-0.0294535	10	P1P2	0.776269	0.0183177	10	P1P2	0.265336	0.286843	10
AGPAT3	P1P2	0.355728	0.250705	0.112537	10	P1P2	0.94494	-0.0164284	10	P1P2	0.481698	1.32244	10
AGPAT4	P1P2	0.258915	0.123977	0.072755	7	P1P2	0.108615	-0.0926989	10	P1P2	0.614864	0.281609	10
AGPAT5	P1P2	0.0199797	-0.202274	-0.343746	10	P1P2	0.589596	0.0249868	10	P1P2	0.0278361	-0.651062	10
AGPAT6	P1P2	0.0136866	0.392617	0.731721	10	P1P2	0.439836	-0.0539469	10	P1P2	0.0160801	1.63683	10
AGPAT9	P1P2	0.564412	-0.060411	-0.0150063	10	P1P2	0.252041	0.0193121	10	P1P2	0.669202	-0.022281	10
AGPS	P1P2	0.258023	0.270361	0.159064	10	P1P2	0.000417693	-0.12964	10	P1P2	0.825157	0.597442	10
AGR2	P1P2	0.205665	0.0438105	0.0300907	10	P1P2	0.154317	0.00680169	10	P1P2	0.385531	0.200982	10
AGR3	P1P2	0.187209	0.153709	0.11185	8	P1P2	0.382619	0.0188578	8	P1P2	0.108354	1.00366	8
AGRN	P1P2	0.549262	0.0838936	0.0218308	10	P1P2	0.453351	-0.0874181	10	P1P2	0.850374	0.021752	10
AGRP	P1P2	0.914195	0.080668	0.00314291	8	P1P2	0.270852	-0.0860608	9	P1P2	0.691964	0.0510495	9
AGT	P1P2	0.137604	0.248946	0.214435	9	P1P2	0.597833	-0.0421838	10	P1P2	0.184274	1.2629	10
AGTPBP1	P1P2	0.270794	-0.0264472	-0.0150051	10	P1P2	0.669907	0.0458678	10	P1P2	0.670705	0.054015	10
AGTR1	P1P2	0.760701	0.0902982	0.0107262	9	P1P2	0.258424	-0.00684443	10	P1P2	0.892848	0.553438	10
AGTR2	P1P2	0.528116	0.118724	0.0329188	8	P1P2	0.00160978	-0.122303	9	P1P2	0.484452	-0.179241	9
AGTRAP	P1P2	0.166891	-0.105262	-0.0818481	9	P1P2	0.946929	-0.0150489	10	P1P2	0.277864	-0.35339	10
AGXT	P1P2	0.920769	0.118296	0.0042408	10	P1P2	0.487772	-0.0035799	10	P1P2	0.909066	0.444324	10
AGXT2	P1P2	0.957688	0.090813	0.00170512	9	P1P2	0.879702	0.0317437	9	P1P2	0.743864	0.484575	9
AHCTF1	P1P2	0.287273	0.299195	0.162075	10	P1P2	0.447882	-0.0169247	10	P1P2	0.24623	1.14788	10
AHCY	P1P2	0.0427689	0.392286	0.536989	10	P1P2	0.0357733	-0.179926	10	P1P2	0.465509	0.805592	10
AHCYL1	P1	0.60708	-0.0656322	-0.0142261	10	P1	0.0827525	-0.0607285	10	P1	0.214967	-0.286874	10
AHCYL2	P1P2	0.388065	-0.0226868	-0.00932643	9	P1P2	0.87018	-0.00452054	9	P1P2	0.361188	-0.0817293	9
AHDC1	P1P2	0.65327	0.156444	0.0289277	10	P1P2	0.611161	-0.0190581	10	P1P2	0.745654	0.653531	10
AHI1	P1P2	0.0580108	0.00439541	0.00543488	10	P1P2	0.202931	0.0320586	10	P1P2	0.174535	-0.0139259	10
AHNAK	P2	0.805782	0.0995733	0.00933823	9	P1	0.4923	-0.0240359	10	P1	0.795682	0.180693	10
AHNAK2	P2	0.27082	-0.0621932	-0.0352834	9	P1	0.0812795	-0.0620377	10	P2	0.497457	-0.189787	9
AHR	P1P2	0.815589	0.0312906	0.00277011	10	P1P2	0.10868	0.0238186	10	P1P2	0.911754	0.255683	10
AHRR	P1P2	0.727523	-0.0079884	-0.00110363	10	P1P2	0.311476	-0.0420825	10	P1P2	0.438571	0.0038719	10
AHSA1	P1P2	0.0495927	0.309611	0.403913	10	P1P2	0.274158	0.0161758	10	P1P2	0.0205253	1.84387	10
AHSA2	P1P2	0.845571	0.114918	0.00837175	10	P1P2	0.999648	0.00592022	10	P1P2	0.982716	0.523511	10
AHSG	P1P2	0.812593	-0.0170314	-0.00153499	10	P1P2	0.441927	-0.0431672	10	P1P2	0.421263	-0.00618067	10
AHSP	P1P2	0.589655	0.143512	0.032922	10	P1P2	0.926943	0.00108622	10	P1P2	0.580395	0.67052	10
AICDA	P1P2	0.135435	-0.161983	-0.140645	10	P1P2	0.139701	-0.00566136	10	P1P2	0.103075	-0.608068	10
AIDA	P1P2	0.107642	0.0306893	0.0297078	9	P1P2	0.727321	-0.0184577	10	P1P2	0.0573401	0.226152	10
AIF1	P1P2	0.847664	0.0897581	0.00644251	10	P1P2	0.226538	0.0207548	10	P1P2	0.583022	0.747307	10
AIF1L	P1P2	0.145504	0.182628	0.152883	10	P1P2	0.18026	-0.0206215	10	P1P2	0.327134	0.617346	10
AIFM1	P1P2	0.999289	0.0387799	1.19738e-05	10	P1P2	0.716097	-0.00462022	10	P1P2	0.908482	0.190557	10
AIFM2	P1P2	0.392004	0.0377634	0.0153587	10	P1P2	0.208618	-0.0337423	10	P1P2	0.271647	-0.261688	10
AIFM3	P1	0.041418	0.326993	0.452169	10	P1	0.774806	-0.0179194	10	P1	0.0283424	1.42621	10
AIG1	P1P2	0.832344	0.00308724	0.000246044	10	P1P2	0.709524	-0.00361946	10	P1P2	0.994121	0.289678	10
AIM1	P1P2	0.217774	0.168995	0.111874	10	P1P2	0.124112	0.037161	10	P1P2	0.0765822	1.08868	10
AIM1L	P2	0.531196	-0.0300119	-0.00824561	9	P1	0.208102	0.0315721	9	P1	0.431864	0.817457	8
AIM2	P1P2	0.526436	-0.0461783	-0.0128678	10	P1P2	0.461445	0.00915571	10	P1P2	0.617353	0.0179408	10
AIMP1	P1P2	0.42905	0.107152	0.0393776	10	P1P2	0.843675	-0.0172808	10	P1P2	0.536804	0.558607	10
AIMP2	P1P2	0.766196	0.221495	0.0256181	10	P1P2	0.333975	0.0326185	10	P1P2	0.987301	1.02904	10
AIP	P1P2	0.04173	0.361656	0.498923	10	P1P2	0.768286	-0.00312596	10	P1P2	0.0845208	1.84541	10
AIPL1	P1P2	0.311673	0.18797	0.0951692	10	P1P2	0.522888	0.0226159	10	P1P2	0.183301	1.15417	10
AIRE	P1P2	0.0746203	0.269593	0.30387	10	P1P2	0.985228	-0.0111981	10	P1P2	0.106003	1.26012	10
AJAP1	P1P2	0.617915	0.193227	0.0403981	10	P1P2	0.897928	-0.00335998	10	P1P2	0.810043	0.812644	10
AJUBA	P1P2	0.988629	0.0391009	0.000194197	10	P1P2	0.0926475	-0.0593967	10	P1P2	0.493713	0.113778	10
AK1	P1P2	0.100486	-0.0266566	-0.0266004	10	P1P2	0.816522	-0.0160588	10	P1P2	0.0882506	-0.180422	10
AK2	P1P2	0.326086	0.123646	0.0601745	10	P1P2	0.000319587	-0.196676	10	P1P2	0.163843	-0.202916	10
AK3	P1P2	0.795365	0.124518	0.0123813	10	P1P2	0.150986	0.0217931	10	P1P2	0.551872	0.640889	10
AK4	P1P2	0.316454	0.183406	0.0916462	10	P1P2	0.481436	-0.0420578	10	P1P2	0.375048	0.520109	10
AK5	P1P2	0.651772	0.010287	0.00191239	10	P1P2	0.0616919	-0.0443374	10	P1P2	0.316196	-0.337732	10
AK7	P1P2	0.553031	0.162113	0.0417037	10	P1P2	0.527007	-0.0237604	10	P1P2	0.395699	0.695904	10
AK8	P1P2	0.279809	0.128943	0.0713236	10	P1P2	0.230341	-0.0449568	10	P1P2	0.51631	0.536627	10
AK9	P1P2	0.523221	-0.0214616	-0.00603746	9	P1P2	0.951948	0.00810495	9	P1P2	0.791203	0.0818193	9
AKAP1	P1P2	0.312028	-0.0693039	-0.0350544	10	P1P2	0.738603	0.00463809	10	P1P2	0.320485	0.0143797	10
AKAP10	P1P2	0.260468	-0.0239735	-0.0140064	10	P1P2	0.343995	0.0458001	10	P1P2	0.384886	-0.150671	10
AKAP11	P1P2	0.567526	0.0209054	0.00514302	10	P1P2	0.21366	-0.0188207	10	P1P2	0.70279	0.069252	10
AKAP12	P2	0.0203046	-0.178457	-0.302021	9	P1	0.366473	0.000234863	10	P2	0.00743962	-0.81584	10
AKAP13	P1P2	0.598081	0.193668	0.0432345	10	P1P2	0.464401	-0.0179899	10	P1P2	0.381028	1.027	10
AKAP14	P1P2	0.481913	0.139206	0.0441328	10	P1P2	0.822805	-0.0321107	10	P1P2	0.608765	0.572641	10
AKAP17A	P1P2	0.673411	0.169267	0.0290665	9	P1P2	0.61955	-0.0419753	9	P1P2	0.870777	0.720387	9
AKAP2	P1P2	0.575398	0.021019	0.00504522	10	P1P2	0.675375	-0.00911677	10	P1P2	0.752358	-0.010028	10
AKAP3	P2	0.216115	-0.0539565	-0.035898	10	P2	0.568987	0.0220184	10	P1	0.214344	1.34405	9
AKAP4	P1P2	0.141201	-0.0274721	-0.0233558	10	P1P2	0.39603	0.0358531	10	P1P2	0.225843	-0.0446196	10
AKAP5	P1P2	0.332564	0.141638	0.0677205	10	P1P2	0.0246949	0.0464512	10	P1P2	0.794545	0.757217	10
AKAP6	P1P2	0.307714	0.135215	0.0692101	10	P1P2	0.190252	-0.066595	10	P1P2	0.613001	0.40207	10
AKAP7	P1P2	0.878822	0.220828	0.0123883	10	P1P2	0.599977	-0.0230302	10	P1P2	0.991886	1.02035	10
AKAP8	P1P2	0.0561119	0.299719	0.374932	10	P1P2	0.998945	-0.0128106	10	P1P2	0.0472913	1.40826	10
AKAP8L	P1P2	0.729865	0.0398599	0.00545114	10	P1P2	0.0641881	-0.0697291	10	P1P2	0.195882	-0.329582	10
AKAP9	P1P2	0.886086	-0.017307	-0.000909035	10	P1P2	0.92706	-0.00923071	10	P1P2	0.932584	-0.0815032	10
AKIP1	P1P2	0.179875	0.332007	0.247355	10	P1P2	0.230684	-0.0358643	10	P1P2	0.156089	1.29815	10
AKIRIN1	P1P2	0.128878	-0.163423	-0.145417	10	P1P2	0.900835	0.0116719	10	P1P2	0.123792	-0.646266	10
AKIRIN2	P1P2	0.539995	0.196898	0.052692	10	P1P2	0.222445	-0.00199627	10	P1P2	0.518885	0.904144	10
AKNA	P1	0.747229	0.119674	0.0151443	10	P1	0.176421	-0.0242734	10	P1	0.523959	0.153238	10
AKNAD1	ENST00000370001.3	0.482283	0.194859	0.0617116	10	ENST00000370001.3	0.766267	0.0151135	10	ENST00000370001.3	0.32881	0.863584	10
AKR1A1	P1P2	0.761667	0.162075	0.019163	10	P1P2	0.673121	0.0474701	10	P1P2	0.767722	0.706702	9
AKR1B1	P1P2	0.816511	0.0501366	0.00441392	10	P1P2	0.854037	0.0106758	10	P1P2	0.865997	0.374908	10
AKR1B10	P1P2	0.474465	-0.0538384	-0.0174326	9	P1P2	0.00148197	-0.134382	10	P1P2	0.0498119	-0.875191	10
AKR1B15	P1P2	0.359405	0.146016	0.0648917	9	P1P2	0.667874	-0.0047939	10	P1P2	0.281272	0.828556	10
AKR1C1	P1P2	0.803481	0.148687	0.0141289	9	P1P2	0.795149	-0.00933032	9	P1P2	0.782244	0.717013	8
AKR1C2	P2	0.148525	-0.0967367	-0.0801173	10	P1	0.725917	0.0030985	9	P2	0.158686	-0.113875	10
AKR1C3	P1P2	0.0905165	0.259516	0.270746	10	P1P2	0.621606	-0.0114747	10	P1P2	0.0536205	1.13374	10
AKR1C4	P1P2	0.138849	0.345054	0.295869	10	P1P2	0.781003	-0.00819104	10	P1P2	0.267237	1.86851	10
AKR1D1	P1P2	0.0175148	-0.129143	-0.226851	10	P1P2	0.585447	0.0268481	10	P1P2	0.0246938	-0.129826	10
AKR1E2	P1P2	0.178386	0.0832859	0.0623511	10	P1P2	0.732181	-0.0246792	10	P1P2	0.187756	0.249204	10
AKR7A2	P1P2	0.219943	-0.038693	-0.025448	10	P1P2	0.630038	-0.00765809	10	P1P2	0.192541	-0.31073	10
AKR7A3	P1P2	0.0895313	0.376167	0.394233	10	P1P2	0.131164	0.0368713	10	P1P2	0.0562669	2.01658	10
AKT1	P1P2	0.0903753	0.206544	0.215621	10	P1P2	0.903163	-0.0142992	10	P1P2	0.0791915	0.968446	10
AKT1S1	P1P2	0.362614	0.393812	0.173496	9	P1P2	0.0653563	-0.0609222	9	P1P2	0.535616	1.58027	9
AKT2	P1P2	0.7005	0.03556	0.00549728	10	P1P2	0.128079	-0.0511358	10	P1P2	0.381429	-0.137302	10
AKT3	P1P2	0.228832	-0.0471689	-0.0302109	10	P1P2	0.569186	0.0317446	10	P1P2	0.291463	-0.123838	10
AKTIP	P1P2	0.00108451	0.309435	0.917403	10	P1P2	0.645569	0.00200198	10	P1P2	0.000993948	1.56674	10
ALAD	P1P2	0.0079143	-0.200407	-0.421173	10	P1P2	0.821548	0.0217064	10	P1P2	0.00824063	-0.94542	9
ALAS1	P1P2	0.899937	0.133005	0.00609001	10	P1P2	0.712041	-0.0532484	10	P1P2	0.816332	0.367188	10
ALAS2	P1P2	0.914054	0.101015	0.00394243	10	P1P2	0.583125	-0.0261777	10	P1P2	0.833314	0.316242	10
ALB	P1	0.0915961	0.243349	0.252626	10	P1	0.315851	-0.0286411	10	P2	0.102329	-0.628767	10
ALCAM	P1P2	0.99159	0.214346	0.00078617	10	P1P2	0.841491	0.00169756	10	P1P2	0.834464	1.08874	10
ALDH16A1	P1P2	0.706854	0.0819936	0.012354	9	P1P2	0.504744	-0.0188568	9	P1P2	0.825849	0.166792	8
ALDH18A1	P1P2	0.0861194	0.243953	0.259785	6	P1P2	1.35195e-07	-0.296004	10	P1P2	0.0781641	-0.32785	10
ALDH1A1	P1P2	0.688438	0.0971411	0.01575	10	P1P2	0.557875	-0.0211831	10	P1P2	0.499781	0.147145	10
ALDH1A2	P1P2	0.463698	0.12791	0.0426919	10	P1P2	0.649688	0.00557455	10	P1P2	0.469844	0.782144	10
ALDH1A3	P1	0.812824	0.142204	0.0127989	10	P1	0.115718	-0.069404	10	P1	0.632168	0.403367	10
ALDH1B1	P1P2	0.685105	-0.00638331	-0.00104841	9	P1P2	0.412692	-0.0247199	9	P1P2	0.63017	-0.0821077	9
ALDH1L1	P1P2	0.176051	0.177218	0.133687	10	P1P2	0.901417	-0.0010128	10	P1P2	0.155145	0.862902	10
ALDH1L2	P1P2	0.236266	-0.104279	-0.0653411	10	P1P2	0.396767	0.00647846	10	P1P2	0.298804	-0.264721	10
ALDH2	P1P2	0.7214	0.0033682	0.00047769	10	P1P2	0.0583717	-0.0578901	10	P1P2	0.399151	-0.0870442	10
ALDH3A1	P1P2	0.62242	0.110033	0.0226577	10	P1P2	0.913295	0.0196844	10	P1P2	0.559186	0.904327	10
ALDH3A2	P1P2	0.978682	0.110445	0.00103361	10	P1P2	0.234363	0.0251665	10	P1P2	0.707168	0.872738	10
ALDH3B1	P1P2	0.126831	0.246342	0.220913	9	P1P2	0.572313	-0.0230549	9	P1P2	0.196233	1.21462	9
ALDH3B2	P1P2	0.936932	0.101624	0.00287512	10	P1P2	0.144531	-0.0354018	10	P1P2	0.599718	0.424504	10
ALDH4A1	P1P2	0.452812	0.190066	0.0653983	10	P1P2	0.265359	0.0316278	10	P1P2	0.633322	0.94253	10
ALDH5A1	P1P2	0.884647	0.045167	0.00240424	9	P1P2	0.408496	0.000893896	10	P1P2	0.594503	0.32591	10
ALDH6A1	P1P2	0.364298	0.14952	0.0655708	10	P1P2	0.169518	-0.0555403	10	P1P2	0.177453	0.524657	10
ALDH7A1	P1P2	0.788385	0.0435216	0.00449411	9	P1P2	0.106623	-0.0446468	10	P1P2	0.984949	0.0896925	10
ALDH8A1	P1P2	0.323097	0.0788511	0.0386897	10	P1P2	0.288261	0.036732	10	P1P2	0.71992	0.36918	10
ALDH9A1	P1P2	0.84197	0.128423	0.00959363	10	P1P2	0.594064	0.036605	10	P1P2	0.811071	0.797693	10
ALDOA	P1P2	0.900289	0.0434105	0.00198029	10	P1P2	0.216269	-0.0294665	10	P1P2	0.999294	0.223755	10
ALDOB	P2	0.569842	0.10538	0.0257387	10	P1	0.0939954	-0.101974	10	P2	0.196341	1.1838	10
ALDOC	P1P2	0.0423145	-0.0501824	-0.068926	10	P1P2	0.858881	-0.016606	10	P1P2	0.023376	-0.185673	10
ALG1	P1P2	0.926547	0.118163	0.00391503	10	P1P2	0.13064	-0.0620258	10	P1P2	0.817935	0.517234	10
ALG10	P1P2	0.355264	-0.0158765	-0.00713565	10	P1P2	0.327982	-0.0039668	10	P1P2	0.4784	0.126325	10
ALG10B	P1P2	0.836516	-0.01447	-0.0011218	10	P1P2	0.984759	0.00466858	10	P1P2	0.817363	-0.115393	10
ALG11	P1P2	0.105789	0.171729	0.167531	10	P1P2	0.0101225	-0.0754683	10	P1P2	0.634162	0.28472	10
ALG12	P1P2	0.949101	0.0335209	0.000760504	10	P1P2	0.701446	-0.0107549	10	P1P2	0.963325	0.129271	10
ALG13	P1P2	0.925367	0.110683	0.00372845	10	P1P2	0.102293	-0.0607758	10	P1P2	0.577472	0.0739497	10
ALG14	P1P2	0.724181	0.0413588	0.00579655	10	P1P2	0.505451	-0.0340999	10	P1P2	0.608146	0.075183	10
ALG1L	ENST00000340333.3	0.599747	0.0591766	0.0131391	9	ENST00000340333.3	0.134097	0.0519101	9	ENST00000340333.3	0.952424	0.492758	8
ALG2	P1P2	0.00744312	-0.143223	-0.304814	10	P1P2	0.450435	-0.00171613	10	P1P2	0.0057817	-1.00678	10
ALG3	P1P2	0.70667	0.0753547	0.0113622	10	P1P2	0.119369	-0.0188373	10	P1P2	0.829521	0.215316	10
ALG5	P1P2	0.915232	0.0132856	0.000511082	10	P1P2	0.0511344	-0.0622049	10	P1P2	0.339579	-0.323838	10
ALG6	P1P2	0.262359	-0.109058	-0.0633742	10	P1P2	0.76896	-0.00924745	10	P1P2	0.223704	-0.514457	10
ALG8	P1P2	0.288283	0.140777	0.0760449	10	P1P2	0.405586	-0.0327623	10	P1P2	0.59583	0.502369	10
ALG9	P1P2	0.0688187	-0.0669113	-0.0777706	10	P1P2	0.438272	-0.0348402	10	P1P2	0.0268165	-0.393824	10
ALK	P1P2	0.286668	0.230623	0.125141	10	P1P2	0.340783	-0.0241506	10	P1P2	0.345349	0.581117	10
ALKBH1	P1P2	0.672659	-0.0015013	-0.000258532	10	P1P2	0.317769	-0.0358762	10	P1P2	0.417868	-0.0559056	10
ALKBH2	P1P2	0.914407	0.15825	0.00614966	10	P1P2	0.266053	0.0232031	10	P1P2	0.693193	0.813283	10
ALKBH3	P1P2	0.0692724	-0.129495	-0.150142	10	P1P2	0.240548	0.0103264	10	P1P2	0.129467	-0.398538	10
ALKBH4	P1P2	0.612383	-0.0461426	-0.00982732	10	P1P2	0.151531	-0.0466539	10	P1P2	0.33365	-0.1742	10
ALKBH5	P1P2	0.164355	-0.0663155	-0.0520058	10	P1P2	0.155126	0.037418	10	P1P2	0.41317	-0.203468	9
ALKBH6	P1P2	0.184743	-0.0342106	-0.0250912	10	P1P2	0.894789	-0.00322487	10	P1P2	0.191331	-0.370272	9
ALKBH7	P1P2	0.484507	0.264799	0.0833322	10	P1P2	0.272871	-0.0599926	10	P1P2	0.653817	0.657222	10
ALKBH8	P1P2	0.459813	0.176114	0.0594243	10	P1P2	0.863037	0.00740556	10	P1P2	0.537096	0.975356	10
ALLC	P1P2	0.508188	0.102915	0.0302545	10	P1P2	0.329073	0.0235994	10	P1P2	0.480322	1.12702	10
ALMS1	P1P2	0.483579	0.104037	0.0328272	10	P1P2	0.561336	-0.020532	10	P1P2	0.469482	0.325586	10
ALOX12	P1P2	0.472071	-0.0769857	-0.0250968	10	P1P2	0.750611	-0.0330919	10	P1P2	0.340698	-0.622519	10
ALOX12B	P1P2	0.795136	-0.0348723	-0.00347184	10	P1P2	0.957695	-0.00679182	10	P1P2	0.776528	0.0353894	10
ALOX15	P1P2	0.193901	-0.0444279	-0.0316513	10	P1P2	0.673121	-0.00157402	10	P1P2	0.204737	-0.2485	10
ALOX15B	P1P2	0.0410346	-0.227429	-0.31541	10	P1P2	0.981126	0.00462572	10	P1P2	0.0133284	-1.07425	9
ALOX5	P1P2	0.820318	0.110678	0.00952022	10	P1P2	0.790833	-0.00962128	10	P1P2	0.741976	0.560826	10
ALOX5AP	P1P2	0.818241	0.135742	0.0118257	10	P1P2	0.814355	-0.0184774	10	P1P2	0.797388	0.764197	10
ALOXE3	P1P2	0.49919	0.00258739	0.000780704	10	P1P2	0.18606	0.0343987	10	P1P2	0.823436	0.175198	10
ALPI	P1P2	0.948865	0.13584	0.00309657	10	P1P2	0.108842	-0.0362513	10	P1P2	0.568144	0.243786	10
ALPK1	P1P2	0.59167	-0.0206019	-0.00469559	8	P1P2	0.0499502	-0.0766809	9	P1P2	0.224965	-0.238908	9
ALPK2	ENST00000361673.3	0.666171	0.185494	0.0327237	10	ENST00000361673.3	0.274933	-0.0512054	10	ENST00000361673.3	0.827109	0.771399	10
ALPK3	P1P2	0.281994	-0.0243782	-0.0134021	10	P1P2	0.308185	0.0230842	10	P1P2	0.481882	0.0309775	10
ALPL	P1	0.175861	0.221834	0.167447	10	P2	0.789249	0.0113327	10	P1	0.233154	0.741574	10
ALPP	P1P2	0.641854	0.0624191	0.0120197	10	P1P2	0.607046	-0.0254951	10	P1P2	0.760988	0.330037	10
ALPPL2	P1P2	0.154324	0.260099	0.211087	10	P1P2	0.126794	0.0583424	10	P1P2	0.0668808	1.38785	10
ALS2	P1P2	0.781084	0.0865246	0.0092843	10	P1P2	0.524323	-0.0370412	10	P1P2	0.982128	0.271166	10
ALS2CL	P1P2	0.512288	0.0583954	0.016963	10	P1P2	0.215234	-0.0347357	10	P1P2	0.31577	-0.184112	10
ALS2CR11	P1P2	0.125745	0.208741	0.187973	9	P1P2	0.230345	-0.0720201	9	P1P2	0.224965	0.612523	9
ALS2CR12	P1P2	0.424817	0.110595	0.0411189	10	P1P2	0.16838	0.0197376	10	P1P2	0.204159	0.887311	10
ALX1	P1P2	0.329388	-0.0166404	-0.00802554	10	P1P2	0.91213	-0.0129885	10	P1P2	0.322355	-0.0685963	10
ALX3	P1P2	0.265788	0.196265	0.112944	10	P1P2	0.318339	0.00100756	10	P1P2	0.152804	0.995534	10
ALX4	P1P2	0.578541	0.193824	0.0460654	10	P1P2	0.682694	-0.0141263	10	P1P2	0.511369	0.97562	10
ALYREF	P1P2	0.254232	0.18209	0.108302	10	P1P2	0.0250261	-0.0685113	10	P1P2	0.713424	0.5222	10
AMACR	P1P2	0.777439	-0.0102002	-0.00111522	10	P1P2	0.969876	-0.0098984	10	P1P2	0.811414	0.0956866	10
AMBN	P1P2	0.824207	0.0808971	0.00679244	8	P1P2	0.549354	-0.0256068	9	P1P2	0.858194	0.40975	9
AMBP	P1P2	0.860117	0.136304	0.0089201	9	P1P2	0.0182883	-0.0812592	10	P1P2	0.415078	0.254158	10
AMBRA1	P1P2	0.562908	0.186	0.0464185	10	P1P2	0.00538235	0.0203845	10	P1P2	0.264641	0.985292	10
AMD1	P1P2	0.688559	0.0340515	0.00551835	9	P1P2	0.662749	-0.0150236	10	P1P2	0.490463	0.397699	10
AMDHD1	P1P2	0.365555	0.291917	0.127582	10	P1P2	0.900021	-0.0275189	10	P1P2	0.256523	1.5071	10
AMDHD2	P1P2	0.194921	-0.09212	-0.0654181	10	P1P2	0.215669	0.0100027	10	P1P2	0.326625	-0.200213	10
AMELX	P1P2	0.585259	-0.0181345	-0.00421902	10	P1P2	0.397176	-0.0302295	10	P1P2	0.561369	0.0418053	10
AMELY	P1P2	0.82945	0.0639815	0.00519594	10	P1P2	0.306167	0.0348017	10	P1P2	0.9517	0.534184	10
AMER1	P1P2	0.732433	0.0372862	0.00504229	10	P1P2	0.429382	-0.0272342	10	P1P2	0.860899	0.198309	10
AMER2	P1P2	0.53334	0.00547291	0.00149408	10	P1P2	0.779537	-0.00281762	10	P1P2	0.488056	0.0569147	10
AMER3	P1P2	0.776246	0.0518713	0.00570589	9	P1P2	0.630665	0.0241181	10	P1P2	0.363031	0.45612	10
AMFR	P1P2	0.802392	0.145714	0.0139322	9	P1P2	0.674061	-0.0301208	9	P1P2	0.917216	0.609088	9
AMH	P1P2	0.898627	0.0721012	0.00334697	9	P1P2	0.357881	-0.0368165	10	P1P2	0.92743	0.48125	10
AMHR2	P1P2	0.350648	-0.0244976	-0.0111496	10	P1P2	0.4263	-0.0106586	10	P1P2	0.306616	-0.390979	10
AMICA1	P1P2	0.417088	0.215098	0.0816883	9	P1P2	0.542761	-0.0143694	9	P1P2	0.475853	0.841209	9
AMIGO1	P1P2	0.909698	0.0587504	0.0024148	10	P1P2	0.554621	-0.0315288	10	P1P2	0.638695	0.0879384	9
AMIGO2	P1P2	0.843061	0.130755	0.00969434	9	P1P2	0.188715	-0.0541947	10	P1P2	0.804906	0.563611	10
AMIGO3	P2	0.516406	-0.0108514	-0.00311444	10	P1	0.00217209	-0.168892	10	P1	0.0330601	-0.395764	10
AMMECR1	P1P2	0.861641	-0.0111531	-0.00072131	10	P1P2	0.334269	0.0235726	10	P1P2	0.858468	0.328383	10
AMMECR1L	P1P2	0.0205169	0.341411	0.576265	9	P1P2	0.247326	-0.0546257	10	P1P2	0.0626102	1.27878	10
AMN	P2	0.3665	0.127357	0.0555183	10	P2	0.505451	-0.0148533	10	P2	0.45735	0.57711	10
AMN1	P1P2	0.442955	0.0456096	0.0161294	10	P1P2	0.369914	0.0373676	10	P1P2	0.500062	0.413636	10
AMOT	P1P2	0.908404	0.0764064	0.00318776	10	P1P2	0.956642	-0.0197069	10	P1P2	0.878998	0.31269	10
AMOTL1	P1P2	0.82945	0.00120457	9.78229e-05	10	P1P2	0.916909	-0.00364545	10	P1P2	0.625994	0.00408622	10
AMOTL2	P1P2	0.901347	0.0778811	0.00351305	10	P1P2	0.654773	-0.00564946	10	P1P2	0.97531	0.274883	10
AMPD1	P1P2	0.430525	-0.0172127	-0.00629988	10	P1P2	0.89444	0.0105678	10	P1P2	0.368813	-0.0215653	10
AMPD2	P1	0.432002	-0.0426162	-0.0155342	10	P2	0.52241	0.0455935	10	P1	0.409533	0.234599	10
AMPD3	P1P2	0.0614724	-0.126173	-0.152836	10	P1P2	0.447618	-0.0087898	10	P1P2	0.03428	-0.160952	10
AMPH	P1P2	0.0321178	0.290054	0.433125	10	P1P2	0.573582	-0.014165	10	P1P2	0.0296872	1.29985	10
AMT	P1P2	0.810406	0.0392834	0.00358648	10	P1P2	0.582924	0.00556551	10	P1P2	0.929656	0.20258	10
AMTN	P1P2	0.997986	0.0453189	3.9672e-05	10	P1P2	0.862922	0.00544162	10	P1P2	0.965675	0.0803639	10
AMY1B	ENST00000330330.5,ENST00000370080.3	0.667575	-0.0815451	-0.0143112	10	ENST00000330330.5,ENST00000370080.3	0.201787	0.0407827	10	ENST00000330330.5,ENST00000370080.3	0.903694	0.0987425	10
AMY2A	P1P2	0.442955	0.0823411	0.0291192	10	P1P2	0.0336673	-0.0648497	10	P1P2	0.852454	0.190265	10
AMY2B	P1P2	0.0104866	-0.173933	-0.344277	10	P1P2	0.148824	0.0704491	10	P1P2	0.0365461	-0.654318	9
AMZ1	P1P2	0.204816	0.21345	0.14699	10	P1P2	0.078273	-0.110428	10	P1P2	0.849796	0.418427	10
AMZ2	P1P2	0.98555	0.117868	0.000745087	10	P1P2	0.446389	0.0166023	10	P1P2	0.852338	1.04218	10
ANAPC1	P1P2	0.525274	0.21753	0.0608246	10	P1P2	0.0475021	-0.0400338	10	P1P2	0.800803	0.385464	10
ANAPC10	P1P2	0.486643	0.18461	0.0577442	10	P1P2	0.321628	-0.148976	10	P1P2	0.53982	0.341605	10
ANAPC11	P1P2	0.506476	-0.0290128	-0.00857157	10	P1P2	0.323353	-0.0396718	10	P1P2	0.27139	-0.206165	10
ANAPC13	P1P2	0.721623	0.159552	0.0226069	10	P1P2	0.0558199	-0.0585148	10	P1P2	0.79955	-0.0084329	10
ANAPC15	P1P2	0.707553	0.263813	0.0396356	9	P1P2	0.629308	-0.0304603	9	P1P2	0.835441	1.14908	9
ANAPC16	P1P2	0.338155	0.161974	0.0762711	9	P1P2	0.152624	-0.0829107	10	P1P2	0.695479	0.696507	10
ANAPC2	P1P2	0.164851	0.176013	0.137802	10	P1P2	0.0463621	-0.104957	10	P1P2	0.777432	0.492381	10
ANAPC4	P1P2	0.0110834	0.373386	0.730092	10	P1P2	0.00597016	-0.172296	10	P1P2	0.416007	1.17465	10
ANAPC5	P1P2	0.106857	0.1685	0.163647	9	P1P2	0.00916847	-0.156501	10	P1P2	0.658716	0.259668	10
ANAPC7	P1P2	0.861592	0.0712174	0.00460764	9	P1P2	0.222278	-0.0565367	10	P1P2	0.846679	0.190384	10
ANG	P1P2	0.0116954	0.299995	0.579586	10	P1P2	0.0686005	-0.110392	10	P1P2	0.121223	0.798659	10
ANGEL1	P1P2	0.63782	0.23372	0.0456459	10	P1P2	0.527007	-0.00425266	10	P1P2	0.753253	1.06603	10
ANGEL2	P1P2	0.842816	0.210955	0.0156671	9	P1P2	0.937399	-0.0281477	9	P1P2	0.674967	0.798078	9
ANGPT1	P1P2	0.239335	0.232696	0.144503	10	P1P2	0.837011	0.0148192	10	P1P2	0.267682	1.21577	10
ANGPT2	P1P2	0.175957	0.19064	0.143855	9	P1P2	0.18655	-0.0380322	10	P1P2	0.311171	0.71121	10
ANGPT4	P1P2	0.342585	0.317515	0.147718	10	P1P2	0.107969	-0.0615862	10	P1P2	0.580294	1.15822	10
ANGPTL1	P1P2	0.31338	0.178407	0.0899043	10	P1P2	0.119683	0.026201	10	P1P2	0.137437	0.842689	10
ANGPTL2	P1P2	0.0778676	0.246625	0.27342	10	P1P2	0.0382638	-0.10028	10	P1P2	0.281404	0.527661	10
ANGPTL3	P1P2	0.943901	0.0879603	0.00220547	10	P1P2	0.360808	-0.0625278	10	P1P2	0.652861	0.283206	10
ANGPTL4	P1P2	0.681347	0.127034	0.0211678	10	P1P2	0.96519	-0.0129012	10	P1P2	0.819081	0.535208	10
ANGPTL5	P1P2	0.546497	-0.0729957	-0.019155	9	P1P2	0.0322104	0.0461403	9	P1P2	0.757299	-0.0467513	8
ANGPTL6	P1P2	0.505654	-0.0320259	-0.00948436	9	P1P2	0.152191	-0.0100922	9	P1P2	0.38401	-0.229922	9
ANGPTL7	P1P2	0.506846	0.126312	0.0372776	8	P1P2	0.411933	0.0183967	8	P1P2	0.303273	0.741883	8
ANHX	P1P2	0.264336	-0.120338	-0.0695367	9	P1P2	0.013043	0.0895159	9	P1P2	0.755173	0.400384	9
ANK1	P1P2	0.999526	0.0993398	2.04458e-05	10	P1P2	0.457699	-0.0447868	10	P1P2	0.741085	0.439485	10
ANK2	ENST00000264366.6	0.814667	0.0316585	0.00281823	10	ENST00000264366.6	0.364216	-0.0245476	10	ENST00000264366.6	0.892265	0.0134981	10
ANK3	P1P2	0.226429	0.210607	0.135856	10	P1P2	0.301262	-0.0210719	10	P1P2	0.267428	0.655618	10
ANKAR	P1P2	0.526533	0.106584	0.0296916	10	P1P2	0.888865	-0.0160091	10	P1P2	0.628084	0.558639	10
ANKDD1A	P1P2	0.780742	0.0925957	0.00995334	10	P1P2	0.153046	0.0291737	10	P1P2	0.875048	0.515364	10
ANKDD1B	P1P2	0.369185	0.308388	0.133457	10	P1P2	0.102293	0.0311542	10	P1P2	0.288976	1.72833	10
ANKEF1	P1P2	0.661537	0.0633802	0.0113733	10	P1P2	0.393419	0.0462598	10	P1P2	0.397587	0.579246	10
ANKFN1	P1P2	0.832666	0.10478	0.00833301	9	P1P2	0.310423	-0.0482274	10	P1P2	0.856616	0.513582	10
ANKFY1	P1P2	0.167543	0.00699613	0.00542812	8	P1P2	0.629418	-0.0503617	9	P1P2	0.248213	-0.0886389	9
ANKH	P1P2	0.10891	0.264408	0.254607	8	P1P2	0.0475573	-0.0733219	9	P1P2	0.294083	1.0457	9
ANKHD1	P1P2	0.0481458	0.307614	0.405264	10	P1P2	0.0125988	-0.0758729	10	P1P2	0.168897	1.28438	10
ANKHD1-EIF4EBP3	P1P2	0.0481458	0.307614	0.405264	10	P1P2	0.0125988	-0.0758729	10	P1P2	0.168897	1.28438	10
ANKIB1	P1P2	0.529639	0.134917	0.0372398	10	P1P2	0.645464	-0.0758979	10	P1P2	0.474749	0.527026	10
ANKK1	P1P2	0.759631	0.071957	0.00859146	10	P1P2	0.616322	-0.024854	10	P1P2	0.656585	-0.0425141	10
ANKLE1	P1P2	0.884796	0.0108775	0.000578209	10	P1P2	0.134269	-0.0541397	10	P1P2	0.762335	-0.208972	10
ANKLE2	P1P2	0.502022	0.154336	0.0461894	10	P1P2	0.627222	0.0207988	10	P1P2	0.308573	0.973301	10
ANKMY1	P1P2	0.533633	0.078967	0.0215388	10	P1P2	0.539559	-0.0206212	10	P1P2	0.581809	0.188508	10
ANKMY2	P1P2	0.732377	0.00381237	0.000515682	9	P1P2	0.0125155	-0.0968261	10	P1P2	0.131378	-0.1807	10
ANKRA2	P1P2	0.0581878	-0.0839732	-0.103721	10	P1P2	0.265485	-0.0185986	10	P1P2	0.0252849	-0.510174	10
ANKRD1	P1P2	0.105278	0.273734	0.26762	10	P1P2	0.725336	0.0101643	10	P1P2	0.0860187	1.33723	10
ANKRD10	P1P2	0.00529169	0.282712	0.643567	10	P1P2	0.542477	-0.0139655	10	P1P2	0.00619616	1.26456	10
ANKRD11	P1P2	0.280271	0.16463	0.0909452	10	P1P2	0.285071	-0.0345931	10	P1P2	0.486116	0.7619	10
ANKRD12	P1P2	0.0243839	-0.22466	-0.362354	9	P1P2	0.0710238	0.0725401	9	P1P2	0.200024	-0.51842	9
ANKRD13A	P1P2	0.101319	0.311126	0.309356	10	P1P2	0.203192	-0.00949821	10	P1P2	0.0928544	1.39948	10
ANKRD13B	P1P2	0.383682	0.17404	0.0724054	10	P1P2	0.578294	-0.0182691	10	P1P2	0.371646	0.632334	10
ANKRD13C	P1P2	0.65327	-0.0494647	-0.00914637	10	P1P2	0.893046	-0.00767728	10	P1P2	0.65733	-0.11342	10
ANKRD13D	P1P2	0.855113	0.11774	0.00800355	10	P1P2	0.0416602	-0.0874096	10	P1P2	0.614968	0.233199	10
ANKRD16	P1P2	0.0708334	0.264228	0.303799	10	P1P2	0.267192	-0.0290791	10	P1P2	0.0934	1.05441	10
ANKRD17	P1P2	0.419969	0.185878	0.0700358	9	P1P2	0.179592	-0.0619536	10	P1P2	0.684186	0.334686	10
ANKRD18A	ENST00000564591.1,ENST00000566717.2	0.287879	0.202285	0.109394	10	ENST00000564591.1,ENST00000566717.2	0.652652	-0.0334798	10	ENST00000564591.1,ENST00000566717.2	0.419903	0.882719	10
ANKRD18B	P1P2	0.385305	0.0516505	0.0213934	10	P1P2	0.461088	0.0324911	10	P1P2	0.356388	0.417407	9
ANKRD2	P1P2	0.232238	-0.139077	-0.0881842	10	P1P2	0.162379	0.0243156	10	P1P2	0.368185	-0.0482953	10
ANKRD22	P1P2	0.542649	0.0169247	0.00449319	10	P1P2	0.08722	0.0595043	10	P1P2	0.856616	0.430977	10
ANKRD23	P1	0.107882	0.194795	0.188377	9	P2	0.535004	0.016903	10	P1	0.0605378	1.03479	9
ANKRD24	P1P2	0.695008	0.146774	0.0231918	10	P1P2	0.528255	-0.0286702	10	P1P2	0.389122	0.815945	9
ANKRD26	P1P2	0.968737	0.135325	0.00186668	10	P1P2	0.215016	-0.0589393	10	P1P2	0.54021	0.582151	10
ANKRD27	P1P2	0.416935	0.119623	0.0454484	10	P1P2	0.19746	-0.0478363	10	P1P2	0.741642	0.250166	10
ANKRD28	P1P2	0.211867	0.180344	0.121541	9	P1P2	0.933087	0.00649938	9	P1P2	0.148216	0.845789	9
ANKRD29	P1P2	0.472162	0.101054	0.0329342	10	P1P2	0.522028	-0.0239345	10	P1P2	0.533893	0.621827	10
ANKRD30A	P1P2	0.553428	0.0780933	0.0200652	10	P1P2	0.946695	-0.0166879	10	P1P2	0.58748	0.4972	10
ANKRD30B	P1P2	0.118748	0.291864	0.270084	9	P1P2	0.122112	-0.0389577	10	P1P2	0.258443	0.93424	10
ANKRD31	P1P2	0.873205	0.112032	0.00659684	10	P1P2	0.30395	0.0337882	10	P1P2	0.468849	0.870554	10
ANKRD32	P1P2	0.551343	0.274599	0.0710053	10	P1P2	0.984877	-0.0273297	10	P1P2	0.550002	1.12885	10
ANKRD33	P1P2	0.0608975	0.302944	0.368198	10	P1P2	0.34392	-0.0391711	10	P1P2	0.0966982	1.22196	10
ANKRD33B	P1P2	0.61781	0.0762868	0.015955	10	P1P2	0.675805	-0.0180466	10	P1P2	0.751686	0.205248	10
ANKRD34A	P2	0.419325	0.0331741	0.0125216	10	P1	0.310213	0.024579	10	P2	0.726989	0.311219	10
ANKRD34B	P1	0.159897	0.17747	0.141294	10	P2	0.359728	0.0119846	10	P1	0.0831227	1.20881	10
ANKRD34C	P1P2	0.134439	0.188276	0.164077	9	P1P2	0.644678	-0.0408928	9	P1P2	0.32369	0.588166	9
ANKRD35	P1P2	0.204127	0.216888	0.149674	10	P1P2	0.180499	0.02342	10	P1P2	0.0846803	1.07518	10
ANKRD36	P1P2	0.0864366	-0.142504	-0.151525	10	P1P2	0.367722	0.035511	10	P1P2	0.130027	-0.42788	10
ANKRD36C	P1P2	0.54946	0.00287675	0.000748138	10	P1P2	0.510631	0.0124012	10	P1P2	0.713204	-0.10657	10
ANKRD37	P1P2	0.597669	0.0133239	0.00297842	10	P1P2	0.147013	0.0176467	10	P1P2	0.870984	0.177961	10
ANKRD39	P1P2	0.490277	-0.0664076	-0.0205571	10	P1P2	0.464221	0.0173792	10	P1P2	0.672425	-0.0888776	10
ANKRD40	P1P2	0.679363	0.160111	0.0268824	9	P1P2	0.587773	-0.0465849	10	P1P2	0.739193	0.68936	10
ANKRD42	P1P2	0.758275	0.0330544	0.00397225	10	P1P2	0.176562	0.00205011	10	P1P2	0.861594	0.110997	10
ANKRD44	ENST00000450567.1	0.320704	0.160695	0.0793666	10	ENST00000328737.2	0.24541	0.0214775	10	ENST00000450567.1	0.207752	0.943744	10
ANKRD45	P1P2	0.955368	0.115611	0.00229251	10	P1P2	0.651064	-0.0135561	10	P1P2	0.903928	0.550618	10
ANKRD46	P1P2	0.287744	0.0153859	0.00832369	10	P1P2	0.612604	-0.0224736	10	P1P2	0.193802	0.0135778	10
ANKRD49	P1P2	0.354029	0.00544417	0.00245511	10	P1P2	0.987925	0.0124334	10	P1P2	0.468487	-0.326563	10
ANKRD50	P1P2	0.88477	0.0991529	0.0052719	9	P1P2	0.25397	0.0159001	9	P1P2	0.517269	0.603682	8
ANKRD52	P1P2	0.0740156	0.297338	0.336194	9	P1P2	0.0712907	-0.0721362	9	P1P2	0.213943	0.84275	9
ANKRD53	P1P2	0.598906	0.121127	0.0269678	10	P1P2	0.964956	0.0058699	10	P1P2	0.691453	0.659129	10
ANKRD54	P1P2	0.356812	0.185368	0.0829637	10	P1P2	0.00142734	-0.113716	10	P1P2	0.537679	0.151031	10
ANKRD55	ENST00000341048.4	0.225819	-0.0977747	-0.063186	9	ENST00000341048.4	0.465807	0.0385919	9	ENST00000341048.4	0.359883	-0.0657089	9
ANKRD6	P1P2	0.787587	0.10685	0.0110805	10	P1P2	0.639359	-0.00827438	10	P1P2	0.815188	0.451828	10
ANKRD60	ENST00000457363.1	0.495614	0.274629	0.0837223	10	ENST00000457363.1	0.800129	-0.0155261	10	ENST00000457363.1	0.571345	1.33898	10
ANKRD61	P1P2	0.521312	-0.000888194	-0.000251272	10	P1P2	0.524706	0.00435667	10	P1P2	0.513947	-0.163341	9
ANKRD62	P1P2	0.2706	-0.0455563	-0.025861	10	P1P2	0.418397	0.0160024	10	P1P2	0.396027	-0.159292	10
ANKRD63	P1P2	0.285734	0.204229	0.111108	9	P1P2	0.813007	-0.00424929	9	P1P2	0.397995	1.1662	9
ANKRD65	P2	0.303908	0.255244	0.132027	9	P2	0.363752	-0.037393	9	P2	0.280433	0.959998	9
ANKRD66	P1P2	0.634009	0.0121828	0.00241103	9	P1P2	0.522618	0.00480767	9	P1P2	0.668992	0.151729	8
ANKRD7	P2	0.165891	0.26077	0.203447	10	P2	0.219617	0.0309595	10	P2	0.0723191	1.27929	10
ANKRD9	P1P2	0.0482636	-0.00995567	-0.0131054	10	P1P2	0.19746	0.0413907	10	P1P2	0.0977691	0.05149	9
ANKS1A	P1P2	0.0743846	-0.164763	-0.185938	8	P1P2	0.230405	-0.0380503	9	P1P2	0.0646309	-0.625435	9
ANKS1B	ENST00000329257.7,ENST00000547776.2	0.502968	0.134686	0.0401983	10	ENST00000329257.7,ENST00000547776.2	0.451936	0.00361725	10	ENST00000329257.7,ENST00000547776.2	0.451838	0.792002	10
ANKS3	P1P2	0.196511	0.171666	0.121301	10	P1P2	0.987573	-0.0122147	10	P1P2	0.223873	0.613306	10
ANKS4B	P1P2	0.274427	0.131162	0.0736568	8	P1P2	0.492261	-0.000436846	9	P1P2	0.153248	0.86841	9
ANKS6	P1P2	0.328303	-0.0525641	-0.0254266	9	P1P2	0.485104	-0.000143379	10	P1P2	0.732971	0.0408681	10
ANKUB1	ENST00000446160.1	0.441016	-0.0387933	-0.0137928	10	ENST00000446160.1	0.246068	0.0367748	10	ENST00000446160.1	0.717605	0.255351	10
ANKZF1	P1P2	0.374112	0.162721	0.0694818	10	P1P2	0.222835	-0.0562857	10	P1P2	0.77348	0.382959	10
ANLN	P1P2	0.0381303	0.276943	0.392908	8	P1P2	2.84123e-05	-0.178935	9	P1P2	0.975582	0.450312	9
ANO1	P1P2	0.384719	0.230565	0.0956513	9	P1P2	0.843186	-0.0194785	9	P1P2	0.556276	1.16309	9
ANO10	P1P2	0.971223	0.00852027	0.000108046	10	P1P2	0.313094	-0.0586269	10	P1P2	0.595115	-0.0260543	10
ANO2	P1P2	0.583219	0.105741	0.0247613	10	P1P2	0.735058	0.00463287	10	P1P2	0.571245	0.515141	10
ANO3	P1P2	0.712214	0.129137	0.0190335	9	P1P2	0.720809	-0.034992	9	P1P2	0.905758	0.36451	9
ANO4	P1P2	0.894863	0.0877383	0.00423281	8	P1P2	0.538395	-0.0526009	10	P1P2	0.941024	0.407214	10
ANO5	P1P2	0.153767	0.208641	0.169654	10	P1P2	0.468447	-0.0224959	10	P1P2	0.322787	0.825288	10
ANO6	P1P2	0.0103212	-0.19676	-0.390818	8	P1P2	0.778467	-0.0367781	9	P1P2	0.00838925	-0.982849	9
ANO7	P1P2	0.784413	0.0866127	0.00913376	9	P1P2	0.193102	-0.0390056	10	P1P2	0.79716	0.574962	10
ANO8	P1P2	0.698959	0.0775989	0.0120704	9	P1P2	0.164465	-0.0955324	10	P1P2	0.896228	0.0670861	10
ANO9	P1P2	0.795365	0.15455	0.0153674	10	P1P2	0.725226	-0.0219452	10	P1P2	0.798754	0.605489	10
ANP32A	P1P2	0.739147	0.00375165	0.000492477	10	P1P2	0.474418	0.00532069	10	P1P2	0.934459	0.379227	10
ANP32B	P1P2	0.424903	0.243059	0.0903476	10	P1P2	0.445512	-0.0486224	10	P1P2	0.605468	0.99125	10
ANP32D	P1P2	0.391183	0.125225	0.0510442	10	P1P2	0.0974489	0.0411748	10	P1P2	0.251066	0.884048	10
ANP32E	P1P2	0.254789	-0.0840059	-0.0498844	10	P1P2	0.817207	0.0154396	10	P1P2	0.229878	-0.246885	10
ANPEP	P2	0.084146	-0.104245	-0.11206	10	P1	0.210111	-0.0238571	10	P2	0.12286	-0.535787	10
ANTXR1	P1P2	0.687018	0.165492	0.0269806	10	P1P2	0.382675	0.005308	10	P1P2	0.525688	0.707622	10
ANTXR2	P1P2	0.104864	0.30673	0.300403	10	P1P2	0.624723	-0.0121521	10	P1P2	0.110437	1.08883	10
ANXA1	P1P2	0.981524	0.0325107	0.000263314	10	P1P2	0.795818	-0.00765246	10	P1P2	0.94642	0.415635	10
ANXA10	P1P2	0.899114	0.0481631	0.00222442	10	P1P2	0.104283	0.0328322	10	P1P2	0.637315	0.439405	10
ANXA11	P1P2	0.204074	-0.0768139	-0.0530179	10	P1P2	0.988745	-0.00033729	10	P1P2	0.219194	-0.407872	10
ANXA13	P1P2	0.847547	0.139976	0.0100553	10	P1P2	0.284939	-0.0276656	10	P1P2	0.887257	0.651091	10
ANXA2	P1P2	0.239453	0.208367	0.12935	10	P1P2	0.895835	0.00145108	10	P1P2	0.214096	0.728796	10
ANXA2R	P1P2	0.345707	0.189471	0.0874015	9	P1P2	0.973925	-0.0166636	9	P1P2	0.267688	0.710743	9
ANXA3	P1P2	0.23709	0.22379	0.139888	10	P1P2	0.716097	0.00170392	10	P1P2	0.299971	1.13977	10
ANXA4	P1P2	0.218717	0.144812	0.0955929	10	P1P2	0.189755	-0.0457173	10	P1P2	0.422285	0.296219	10
ANXA5	P1P2	0.721067	0.108299	0.0153811	10	P1P2	0.103036	0.0397372	10	P1P2	0.360316	0.853554	10
ANXA6	P1P2	0.818126	0.20453	0.0178309	10	P1P2	0.973157	-0.00770921	10	P1P2	0.803082	0.606457	10
ANXA7	P1P2	0.782452	0.120709	0.0128606	10	P1P2	0.0226287	-0.0888158	10	P1P2	0.569243	0.0196356	10
ANXA8	P1P2	0.488784	0.0599235	0.0186292	10	P1P2	0.143442	0.0368364	10	P1P2	0.878882	0.336798	10
ANXA8L1	ENST00000359178.4	0.13466	-0.10738	-0.0935025	10	ENST00000359178.4	0.048498	0.0542148	10	ENST00000359178.4	0.391857	-0.130136	10
ANXA9	P1P2	0.656915	0.0817607	0.0149206	10	P1P2	0.411753	0.02333	10	P1P2	0.551281	0.741638	10
AOAH	P1P2	0.566923	0.0887405	0.0218724	10	P1P2	0.0769388	0.0570172	10	P1P2	0.283317	0.920106	10
AOC1	P1	0.718874	0.179532	0.0257354	9	P2	0.0987023	-0.0542481	10	P2	0.843679	0.325972	10
AOC2	P1P2	0.834893	0.110555	0.00866412	10	P1P2	0.113858	-0.0320923	10	P1P2	0.786145	0.488631	10
AOC3	P1P2	0.61207	-0.0384076	-0.00818846	10	P1P2	0.810821	0.00834643	10	P1P2	0.72876	-0.0549781	10
AOX1	P1	0.114685	-0.111853	-0.105197	10	P1	0.319266	0.00270759	10	P1	0.144478	-0.573637	10
AP1AR	P1P2	0.630627	0.117294	0.0234854	10	P1P2	0.773006	-0.0059025	10	P1P2	0.578378	0.485299	10
AP1B1	P1P2	0.681021	0.115786	0.0193178	10	P1P2	0.080921	-0.0408009	10	P1P2	0.874002	0.468541	10
AP1G1	P1P2	0.153638	0.156925	0.127659	10	P1P2	0.443761	-0.00465543	10	P1P2	0.116897	0.645392	10
AP1G2	P1P2	0.112854	0.251681	0.238463	10	P1P2	0.440271	-0.0203721	10	P1P2	0.1239	1.12589	10
AP1M1	P1P2	0.536238	0.121768	0.0329555	9	P1P2	0.000175022	-0.0847528	10	P1P2	0.453434	0.0888188	10
AP1M2	P1P2	0.151822	0.226089	0.185091	9	P1P2	0.0485315	-0.0985552	10	P1P2	0.495203	0.531718	10
AP1S1	P1P2	0.217301	-0.0956186	-0.0633893	9	P1P2	0.281509	0.0433963	9	P1P2	0.333303	-0.313757	9
AP1S2	P1P2	0.729865	0.134022	0.0183285	10	P1P2	0.380118	-0.0202403	10	P1P2	0.621303	0.584752	10
AP1S3	P1P2	0.414978	0.139066	0.0531197	10	P1P2	0.191948	-0.020094	10	P1P2	0.548822	0.990846	10
AP2A1	P1P2	0.995736	0.0109034	2.02353e-05	10	P1P2	0.0105692	-0.10674	10	P1P2	0.168305	-0.48236	10
AP2A2	P1P2	0.553329	0.0820662	0.0210924	10	P1P2	0.407663	-0.0695284	10	P1P2	0.854303	0.456858	10
AP2B1	P1P2	0.75613	0.167387	0.0203214	10	P1P2	0.0977461	-0.0502734	10	P1P2	0.457686	0.37292	9
AP2M1	P1	0.396835	-0.0335599	-0.0134706	5	P1	6.234e-06	-0.253519	10	P1	0.00365609	-0.701351	10
AP2S1	P1P2	0.521731	0.164339	0.0464346	8	P1P2	0.171259	-0.163852	10	P1P2	0.789888	0.605456	10
AP3B1	P1P2	0.352029	-0.0518175	-0.0234952	10	P1P2	0.918192	-0.0289051	10	P1P2	0.179307	-0.117346	10
AP3B2	P1P2	0.51516	0.207427	0.0597512	10	P1P2	0.394805	-0.0536087	10	P1P2	0.737413	0.698607	10
AP3D1	P1P2	0.682327	0.124422	0.0206549	10	P1P2	0.301193	-0.069341	10	P1P2	0.968149	0.301747	9
AP3M1	P1P2	0.528182	0.203942	0.056536	10	P1P2	0.603251	-0.00335961	10	P1P2	0.406443	0.898661	10
AP3M2	P1P2	0.881984	-0.0484959	-0.00264493	10	P1P2	0.76436	0.00300849	10	P1P2	0.817935	-0.0872021	10
AP3S1	P1P2	0.382953	-0.0316127	-0.0131779	10	P1P2	0.0986423	0.0269094	10	P1P2	0.609384	0.149938	10
AP3S2	P1P2	0.981168	0.00616973	5.09405e-05	10	P1P2	0.860151	-0.0150835	10	P1P2	0.853841	0.400729	10
AP4B1	P1P2	0.995973	0.0549554	9.63122e-05	10	P1P2	0.10868	0.0211171	10	P1P2	0.759641	0.4386	10
AP4E1	P1P2	0.982708	0.0705242	0.000534266	10	P1P2	0.837126	-0.00438979	10	P1P2	0.68516	0.400235	10
AP4M1	P1P2	0.588939	0.00426002	0.000979507	10	P1P2	0.650535	0.00155725	10	P1P2	0.701042	0.406204	10
AP4S1	P1P2	0.144562	0.241134	0.20254	10	P1P2	0.0159276	-0.0477619	10	P1P2	0.381108	0.630266	10
AP5B1	P1P2	0.601487	0.161927	0.0357492	10	P1P2	0.682801	0.00881798	10	P1P2	0.88586	0.627856	10
AP5M1	P1P2	0.115061	0.238703	0.224159	10	P1P2	0.810707	0.0268237	10	P1P2	0.152466	1.28601	10
AP5S1	P1P2	0.860239	0.0724594	0.00473744	9	P1P2	0.250039	-0.0972654	10	P1P2	0.288708	-0.109338	10
AP5Z1	P1P2	0.117338	0.330641	0.307683	10	P1P2	0.961794	-0.00320565	10	P1P2	0.09081	1.52157	10
APAF1	P1P2	0.30038	0.259584	0.135588	10	P1P2	0.684528	-0.0011438	10	P1P2	0.221859	1.27179	10
APBA1	P1P2	0.126171	-0.10873	-0.0977525	9	P1P2	0.0919652	-0.0495108	10	P1P2	0.0135327	-0.814915	10
APBA2	P1P2	0.386119	0.00501805	0.00207385	10	P1P2	0.499552	-0.00866761	10	P1P2	0.390473	-0.0999818	10
APBA3	P1P2	0.970731	0.0990278	0.00127755	8	P1P2	0.201191	0.0176798	9	P1P2	0.499133	0.552959	9
APBB1	P1P2	0.755227	-0.00699943	-0.000853388	10	P1P2	0.302983	0.0314697	10	P1P2	0.996237	0.24785	10
APBB1IP	P1P2	0.505432	0.216979	0.064299	10	P1P2	0.019572	0.0718041	10	P1P2	0.212308	1.56516	10
APBB2	P1P2	0.00656964	-0.167323	-0.365176	10	P1P2	0.684312	0.0182065	10	P1P2	0.00584723	-0.912281	10
APBB3	P1P2	0.111779	0.357764	0.340462	10	P1P2	0.0188757	-0.110364	9	P1P2	0.431375	1.16233	10
APC	P2	0.671684	0.0967433	0.0167206	10	P2	0.0219063	-0.0477397	10	P1	0.652754	0.545547	10
APC2	P1	0.11623	-0.124291	-0.116172	10	P1	0.432908	0.0141189	10	P1	0.158468	-0.123544	10
APCDD1	P1P2	0.818396	0.0914584	0.00796023	8	P1P2	0.201191	-0.0680042	9	P1P2	0.594953	0.426914	9
APCDD1L	P1P2	0.51162	0.00155878	0.000453688	10	P1P2	0.237616	0.026003	10	P1P2	0.799323	0.397575	10
APCS	P1P2	0.128436	0.0131113	0.0116863	9	P1P2	0.770308	0.0209337	10	P1P2	0.128478	0.163784	9
APEH	P1P2	0.384818	-0.0514879	-0.0213543	10	P1P2	0.591524	0.00455947	10	P1P2	0.336977	0.159976	10
APEX1	P1P2	0.773009	0.0338885	0.00378925	9	P1P2	0.247266	-0.0406427	10	P1P2	0.478491	0.097035	10
APEX2	P1P2	0.779005	0.0499183	0.00541411	9	P1P2	0.773482	0.00827294	9	P1P2	0.754819	0.273194	9
APH1A	P1P2	0.00438375	0.374013	0.881981	10	P1P2	0.126356	-0.0450942	10	P1P2	0.0113535	1.6493	10
APH1B	P1P2	0.257212	0.322044	0.189912	10	P1P2	0.287861	-0.0338671	10	P1P2	0.540795	1.14116	10
API5	P1P2	0.436714	0.156805	0.056419	10	P1P2	0.00157627	-0.0791693	10	P1P2	0.950175	0.189908	10
APIP	P1P2	0.136818	0.183113	0.158184	9	P1P2	0.123395	-0.0406857	10	P1P2	0.340922	0.418133	10
APITD1	P1P2	0.334939	0.159254	0.075651	10	P1P2	0.739269	-0.00784138	10	P1P2	0.35042	0.860101	10
APITD1-CORT	P1P2	0.334939	0.159254	0.075651	10	P1P2	0.739269	-0.00784138	10	P1P2	0.35042	0.860101	10
APLF	P1P2	0.664977	-0.0216326	-0.00383316	9	P1P2	0.980423	-0.0119286	10	P1P2	0.673501	-0.0203157	10
APLN	P1P2	0.391675	0.0140438	0.00571687	10	P1P2	0.176938	-0.0389639	10	P1P2	0.215022	0.0457386	10
APLNR	P1P2	0.271764	-0.0447933	-0.0253444	10	P1P2	0.238552	0.0291072	10	P1P2	0.501092	0.146338	10
APLP1	P1P2	0.833271	0.0401359	0.00317932	10	P1P2	0.83552	-0.0250905	10	P1P2	0.775738	-0.0235533	10
APLP2	P1P2	0.332786	0.198826	0.0950062	10	P1P2	0.0307472	-0.0414613	10	P1P2	0.682779	0.843146	10
APMAP	P1P2	0.752633	0.0986972	0.0121809	10	P1P2	0.67645	0.0209244	10	P1P2	0.622136	0.655224	10
APOA1	P1P2	0.923245	0.0847876	0.00294069	10	P1P2	0.634953	-0.0200634	10	P1P2	0.968729	0.307457	10
APOA1BP	P1P2	0.927137	0.0263152	0.000864621	10	P1P2	0.568289	-0.0127335	10	P1P2	0.920875	0.0531586	10
APOA2	P1P2	0.478313	0.185578	0.0594384	10	P1P2	0.722362	-9.1508e-05	10	P1P2	0.492969	1.0268	10
APOA4	P1P2	0.513149	0.0591453	0.0171378	10	P1P2	0.904326	0.0104458	10	P1P2	0.643008	0.304123	10
APOA5	P1P2	0.956077	0.0261177	0.000509476	10	P1P2	0.886079	-0.000755848	10	P1P2	0.881905	0.107497	10
APOB	P1P2	0.190158	-0.00343743	-0.00247799	10	P1P2	0.670335	0.0216637	10	P1P2	0.252529	0.415843	10
APOBEC1	P1P2	0.23609	-0.00898281	-0.00563152	10	P1P2	0.936171	0.0245578	10	P1P2	0.309835	-0.321786	10
APOBEC2	P1P2	0.0253794	0.233913	0.373212	10	P1P2	0.14276	-0.0626476	10	P1P2	0.0794943	1.00636	10
APOBEC3A	P1P2	0.670671	0.0462587	0.00802544	9	P1P2	0.617564	-0.0471744	10	P1P2	0.692758	0.388217	10
APOBEC3A_B	P1P2	0.670671	0.0462587	0.00802544	9	P1P2	0.617564	-0.0471744	10	P1P2	0.692758	0.388217	10
APOBEC3B	P1P2	0.201626	0.310793	0.216142	9	P1P2	0.00985924	-0.0879747	10	P1P2	0.344446	1.11558	10
APOBEC3C	P1P2	0.0925419	0.376701	0.389382	10	P1P2	0.850465	-0.0244345	10	P1P2	0.069579	1.61532	10
APOBEC3D	P1P2	0.0925419	0.376701	0.389382	10	P1P2	0.850465	-0.0244345	10	P1P2	0.069579	1.61532	10
APOBEC3F	P1P2	0.123834	0.241166	0.218777	10	P1P2	0.826581	-0.016408	10	P1P2	0.118626	1.05202	10
APOBEC3G	P1P2	0.959683	0.0335434	0.000599495	9	P1P2	0.0520513	-0.0511488	10	P1P2	0.763122	0.128555	10
APOBEC3H	P1P2	0.376839	-0.0243008	-0.0102998	8	P1P2	0.484825	0.0233695	8	P1P2	0.58731	0.00235729	8
APOBEC4	P1P2	0.955723	0.154894	0.00304648	10	P1P2	0.13139	0.0135231	10	P1P2	0.483537	0.687113	10
APOBR	P1	0.935515	0.0370928	0.0010738	10	P2	0.0828045	0.0560548	10	P2	0.66888	0.967976	10
APOC1	P1P2	0.511524	0.106324	0.0309546	10	P1P2	0.669585	-0.012759	10	P1P2	0.552759	0.489921	10
APOC2	P1P2	0.883976	0.0960435	0.00514404	10	P1P2	0.524227	0.0074139	10	P1P2	0.623282	0.59715	10
APOC3	P1P2	0.517366	0.130968	0.0374833	10	P1P2	0.171719	0.0407934	10	P1P2	0.709471	0.789399	10
APOC4	P1P2	0.296173	0.185082	0.0978073	10	P1P2	0.416035	0.028415	10	P1P2	0.211391	0.983188	10
APOD	P1P2	0.250846	0.171053	0.102733	10	P1P2	0.0585282	-0.0928725	10	P1P2	0.745654	0.48048	10
APOE	P1P2	0.620469	0.0968478	0.0200746	9	P1P2	0.835799	-0.000234653	9	P1P2	0.61414	0.410703	9
APOF	P1P2	0.56642	0.164375	0.0405778	10	P1P2	0.807519	0.00299652	10	P1P2	0.569643	0.864785	10
APOH	P2	0.0360191	-0.147725	-0.213237	9	P2	0.212217	0.0197495	9	P2	0.0850217	-0.658427	9
APOL1	P1P2	0.472894	-0.00397846	-0.00129394	10	P1P2	0.738825	0.0245315	10	P1P2	0.601871	0.122129	10
APOL2	P1P2	0.0880282	-0.121186	-0.127897	10	P1P2	0.448146	-0.0150365	10	P1P2	0.0448474	-0.555686	10
APOL3	P1P2	0.556314	0.122887	0.031297	10	P1P2	0.740156	-0.02012	10	P1P2	0.622448	0.556744	10
APOL4	P1P2	0.86713	0.112741	0.00698041	9	P1P2	0.293226	-0.0486115	10	P1P2	0.996355	0.474911	10
APOL5	ENST00000249044.2	0.704133	0.104566	0.0159301	10	ENST00000249044.2	0.792418	-0.00174239	10	ENST00000249044.2	0.765033	0.595639	10
APOL6	P1P2	0.676889	-0.0516683	-0.00875688	10	P1P2	0.98054	-0.0158107	10	P1P2	0.711447	-0.0108555	10
APOLD1	P1P2	0.583118	0.0661517	0.0154956	10	P1P2	0.770757	-0.00154096	10	P1P2	0.527709	0.387613	10
APOM	P1P2	0.0317382	0.33131	0.496441	10	P1P2	0.331994	-0.039847	10	P1P2	0.0602786	1.48639	10
APOO	P1P2	0.117755	0.245735	0.228293	10	P1P2	0.36189	-0.0576359	10	P1P2	0.336384	0.831729	10
APOOL	P1P2	0.935988	0.0943207	0.00270983	10	P1P2	0.0257391	-0.0618821	10	P1P2	0.445747	0.0705021	10
APOPT1	P1P2	0.826095	0.0974955	0.00808921	10	P1P2	0.00335763	-0.0839327	10	P1P2	0.208551	-0.0262089	10
APP	P1P2	0.173719	0.228205	0.173471	9	P1P2	0.0870572	-0.0844337	10	P1P2	0.516405	1.10343	10
APPBP2	P1P2	0.989458	0.0850846	0.000391602	10	P1P2	0.347528	-0.0592931	10	P1P2	0.736191	0.295645	10
APPL1	P1P2	0.774027	0.0488365	0.00543276	10	P1P2	0.164599	-0.0434845	10	P1P2	0.846794	0.109407	10
APPL2	P1P2	0.504199	-0.0372013	-0.0110636	10	P1P2	0.558764	-0.0330875	10	P1P2	0.298119	-0.232188	10
APRT	P1P2	0.211901	0.176571	0.118985	10	P1P2	0.574683	-0.0186386	10	P1P2	0.255597	0.513031	10
APTX	P1	0.0740179	0.271005	0.306416	10	P2	0.446389	-0.0467434	10	P1	0.126258	1.19308	10
AQP1	ENST00000509504.1	0.97809	0.0139628	0.000134341	10	ENST00000509504.1	0.455833	0.0148574	10	ENST00000509504.1	0.856154	0.453268	10
AQP10	P1P2	0.78097	0.183046	0.0196529	10	P1P2	0.604071	0.00829205	10	P1P2	0.919003	0.874628	10
AQP11	P1P2	0.0314795	-0.134803	-0.20247	10	P1P2	0.863846	0.027793	10	P1P2	0.0366629	-0.412777	10
AQP12A	P1P2	0.358667	0.00509037	0.00226678	9	P1P2	0.0910899	-0.0719017	10	P1P2	0.108802	-0.178137	10
AQP12B	P1P2	0.739605	-0.022383	-0.00293218	8	P1P2	0.543452	-0.0409641	10	P1P2	0.617736	-0.155044	8
AQP2	P1P2	0.416424	-0.0140111	-0.00533072	10	P1P2	0.944706	0.0104296	10	P1P2	0.462002	-0.0956951	10
AQP3	P2	0.648464	0.0782313	0.0147164	8	P2	0.59776	0.012195	9	P1	0.713054	0.444948	9
AQP4	P1P2	0.452044	0.00572671	0.00197468	9	P1P2	0.492749	0.00636258	9	P1P2	0.699429	0.124143	9
AQP5	P1P2	0.132392	-0.107854	-0.094711	10	P1P2	0.474599	0.0108642	10	P1P2	0.190686	-0.184684	10
AQP6	P1P2	0.0998422	-0.101491	-0.101561	10	P1P2	0.698181	-0.001138	10	P1P2	0.062072	-0.437015	10
AQP7	P1P2	0.270888	-0.0556583	-0.03157	9	P1P2	0.757644	-0.0332866	10	P1P2	0.155574	-0.591307	10
AQP8	P1P2	0.293287	-0.0497685	-0.0265121	9	P1P2	0.653712	-0.0239757	10	P1P2	0.243301	-0.205991	10
AQP9	P1P2	0.931384	0.0386226	0.00119233	10	P1P2	0.407081	-0.0110546	10	P1P2	0.919237	0.0320957	10
AQPEP	P1P2	0.0423447	-0.229562	-0.315235	10	P1P2	0.0131139	0.0637845	10	P1P2	0.284178	-0.242258	10
AQR	P1P2	0.937408	0.0519109	0.00145722	8	P1P2	0.0022835	-0.168477	10	P1P2	0.105052	-0.485266	10
AR	P1P2	0.28593	-0.0531235	-0.0288853	10	P1P2	0.413177	0.0228171	10	P1P2	0.531957	-0.187892	10
ARAF	P1P2	0.508188	0.0898774	0.0264218	10	P1P2	0.0139187	0.0514676	10	P1P2	0.94642	0.572994	10
ARAP1	P2	0.315594	0.0521252	0.026108	10	P2	0.0019602	0.0672194	10	P1	0.533118	-0.239453	10
ARAP2	P1P2	0.380126	-0.0666278	-0.0279885	10	P1P2	0.677525	0.00970263	10	P1P2	0.483813	-0.0885095	10
ARAP3	P1P2	0.249501	0.189091	0.114008	10	P1P2	0.41789	0.0221438	10	P1P2	0.112893	0.780279	10
ARC	P1P2	0.817799	0.0276079	0.00241165	9	P1P2	0.214039	-0.0374796	9	P1P2	0.510446	0.0113818	9
ARCN1	P1P2	0.0247002	0.34894	0.560851	6	P1P2	2.61108e-07	-0.27661	10	P1P2	0.557402	0.160937	10
AREG	P1P2	0.316745	0.143686	0.071741	9	P1P2	0.91481	0.0159215	10	P1P2	0.284642	0.956431	10
AREL1	P1P2	0.605316	0.210778	0.0459533	10	P1P2	0.360267	-0.0202715	10	P1P2	0.579991	0.700019	10
ARF1	P1P2	0.772777	-0.0298765	-0.00334455	10	P1P2	0.914694	-0.0378602	10	P1P2	0.604954	-0.235705	10
ARF3	P1P2	0.209951	0.0154261	0.010457	10	P1P2	0.637784	0.0186209	10	P1P2	0.341446	0.125393	10
ARF4	P1P2	0.950083	0.0346163	0.000769812	9	P1P2	0.00655671	-0.118688	10	P1P2	0.178402	-0.346073	10
ARF5	P2	0.741501	0.00305503	0.000396812	10	P1	0.118084	-0.0773048	10	P1	0.68213	0.213752	10
ARF6	P1	0.611758	-0.00659669	-0.00140787	10	P1	0.342424	-0.0158974	10	P1	0.33557	0.0753612	10
ARFGAP1	P1P2	0.970037	0.0484593	0.000640222	9	P1P2	0.350553	0.00940943	10	P1P2	0.626531	0.559065	9
ARFGAP2	P1P2	0.149422	0.346315	0.285913	9	P1P2	0.506203	-0.0492216	10	P1P2	0.220857	1.26499	10
ARFGAP3	P1P2	0.371564	0.0350618	0.0150754	10	P1P2	0.562822	-0.0325969	10	P1P2	0.216223	0.137925	10
ARFGEF1	P1P2	0.610821	0.060241	0.0128968	10	P1P2	0.86246	-0.0273385	10	P1P2	0.703009	0.150014	10
ARFGEF2	P1P2	0.362495	-0.0356452	-0.0157087	10	P1P2	0.703299	0.0130284	10	P1P2	0.490927	-0.134508	10
ARFIP1	P1P2	0.0605506	0.403911	0.491916	10	P1P2	0.501608	-0.0435628	10	P1P2	0.0579415	1.70281	10
ARFIP2	P1P2	0.261539	0.17787	0.103603	10	P1P2	0.0295075	-0.0645643	10	P1P2	0.541283	0.456797	10
ARFRP1	P1P2	0.0668956	0.277322	0.325743	10	P1P2	0.517263	-0.0567557	10	P1P2	0.173182	1.16563	10
ARG1	P1P2	0.0860559	-0.12949	-0.137936	10	P1P2	0.263033	-0.0432601	10	P1P2	0.0231163	-0.607303	10
ARG2	P1P2	0.26777	-0.050295	-0.0287808	10	P1P2	0.928461	-0.0191288	10	P1P2	0.293151	-0.353049	10
ARGFX	P1P2	0.534707	0.0309039	0.0084023	10	P1P2	0.506955	0.0280632	10	P1P2	0.901127	0.251109	10
ARGLU1	P1P2	0.699698	0.0725099	0.0112455	7	P1P2	0.000959216	-0.0925626	9	P1P2	0.447959	-0.290673	9
ARHGAP1	P1P2	0.679439	0.0858366	0.0144077	8	P1P2	0.00181845	-0.1373	10	P1P2	0.509475	-0.234158	10
ARHGAP10	P1P2	0.558429	-0.0270583	-0.00684662	9	P1P2	0.816865	-0.0260917	10	P1P2	0.367793	-0.218555	10
ARHGAP11A	P1P2	0.098111	0.198092	0.199733	10	P1P2	0.0171268	-0.11562	10	P1P2	0.392999	0.477469	10
ARHGAP11B	P1P2	0.690749	0.0502402	0.00807258	9	P1P2	0.00474845	-0.136163	10	P1P2	0.104988	-0.138604	10
ARHGAP12	P1P2	0.0575019	0.250701	0.310949	10	P1P2	0.72975	-0.0325218	10	P1P2	0.16622	1.34717	10
ARHGAP15	P1P2	0.798688	-0.0280649	-0.00273977	10	P1P2	0.55344	-0.0229586	10	P1P2	0.65829	0.200659	10
ARHGAP17	P1P2	0.936696	-0.0217091	-0.000616567	10	P1P2	0.907353	-0.0171458	10	P1P2	0.908132	0.12195	10
ARHGAP18	P1P2	0.69962	-0.030664	-0.00475714	10	P1P2	0.684636	-0.032627	10	P1P2	0.47066	-0.0120698	10
ARHGAP19	P1P2	0.521698	0.168132	0.0475108	10	P1P2	0.210218	-0.0521495	10	P1P2	0.697331	0.325058	10
ARHGAP20	P1P2	0.796167	-0.00807017	-0.000798914	10	P1P2	0.153469	0.0117105	10	P1P2	0.816218	0.238605	10
ARHGAP21	P1P2	0.827598	0.144609	0.011884	10	P1P2	0.544622	0.00832388	10	P1P2	0.73608	0.649043	10
ARHGAP22	P1P2	0.885265	0.0978531	0.00517903	10	P1P2	0.0869487	-0.066698	10	P1P2	0.527902	0.0686688	10
ARHGAP23	P1P2	0.073802	0.275784	0.312168	10	P1P2	0.0111264	0.0543091	10	P1P2	0.00952016	1.47245	10
ARHGAP24	P1P2	0.867361	0.111481	0.00688953	10	P1P2	0.978313	-0.00502963	10	P1P2	0.896461	0.512764	10
ARHGAP25	P1P2	0.843712	0.0630543	0.00465377	10	P1P2	0.582218	-0.0104796	10	P1P2	0.901944	0.241881	10
ARHGAP26	P1P2	0.407541	0.204789	0.0798325	10	P1P2	0.289731	-0.0504412	10	P1P2	0.714524	0.889246	10
ARHGAP27	P2	0.309265	0.0103876	0.00529422	10	P2	0.0154153	-0.0678632	10	P2	0.0845474	-0.222622	10
ARHGAP28	P1P2	0.724181	0.0577355	0.00809179	10	P1P2	0.667018	0.00919703	10	P1P2	0.782295	-0.0344437	10
ARHGAP29	P1P2	0.303229	-0.0761989	-0.0394884	10	P1P2	0.731407	-0.0161624	10	P1P2	0.218035	-0.309621	10
ARHGAP30	P1P2	0.459092	0.191886	0.0648768	10	P1P2	0.671406	-0.0402597	10	P1P2	0.701369	0.570899	10
ARHGAP31	P1P2	0.183367	-0.0395224	-0.0291153	9	P1P2	0.218992	0.0445802	9	P1P2	0.433501	-0.110718	9
ARHGAP32	ENST00000310343.9	0.989932	0.130204	0.000572199	10	ENST00000310343.9	0.199718	0.0256668	10	ENST00000310343.9	0.71992	0.824694	10
ARHGAP33	P1P2	0.500227	0.0131343	0.00395124	10	P1P2	0.242437	-0.0486459	10	P1P2	0.178307	0.0990235	10
ARHGAP35	ENST00000404338.3	0.457832	0.0351447	0.0119244	10	ENST00000404338.3	0.34392	-0.0348398	10	ENST00000404338.3	0.220191	0.139271	10
ARHGAP36	P1P2	0.981795	0.0216619	0.000172849	6	P1P2	0.793524	-0.0180701	6	P1P2	0.837257	0.00487782	6
ARHGAP39	P1P2	0.535489	0.119049	0.032292	10	P1P2	0.357113	-0.0305143	10	P1P2	0.672318	0.410479	10
ARHGAP4	P1	0.161295	0.246596	0.195397	9	P2	0.497873	-0.0185989	10	P2	0.208711	-0.313985	10
ARHGAP40	P1P2	0.963767	0.052382	0.000839579	10	P1P2	0.735058	-0.0179681	10	P1P2	0.950057	0.172743	10
ARHGAP42	P1P2	0.555218	0.114918	0.0293656	10	P1P2	0.0875464	-0.0771311	10	P1P2	0.704322	0.515725	10
ARHGAP44	P1P2	0.231022	0.223973	0.142525	10	P1P2	0.444461	-0.0364966	10	P1P2	0.438484	1.0943	10
ARHGAP5	P1P2	0.982269	0.124836	0.000969901	9	P1P2	0.44929	-0.0501281	10	P1P2	0.904745	0.703852	10
ARHGAP6	P1P2	0.878237	-0.00983668	-0.000554676	10	P1P2	0.718074	-0.0158911	10	P1P2	0.808444	0.355016	10
ARHGAP8	P1	0.587609	0.273087	0.0630591	10	P1	0.440358	-0.0156293	10	P1	0.455924	0.880159	10
ARHGAP9	P1P2	0.0182002	0.423698	0.737203	9	P1P2	0.692484	-0.022913	9	P1P2	0.0208009	1.90139	9
ARHGDIA	P1P2	0.0174164	0.319527	0.562061	9	P1P2	0.822577	-0.0176716	10	P1P2	0.0489764	1.67086	10
ARHGDIB	P1P2	0.533828	0.0972411	0.0265078	10	P1P2	0.0545515	0.0594715	10	P1P2	0.771338	1.06839	10
ARHGDIG	P1P2	0.430959	0.142547	0.05211	10	P1P2	0.682262	-0.0190133	10	P1P2	0.467222	0.624361	10
ARHGEF1	P2	0.381094	0.210465	0.0881781	10	P1	0.357113	0.0155223	10	P2	0.304252	0.857323	10
ARHGEF10	P1P2	0.161491	-0.144332	-0.114289	10	P1P2	0.90549	0.00318515	10	P1P2	0.15272	-0.570684	10
ARHGEF10L	P1P2	0.298582	0.153133	0.0803853	10	P1P2	0.380038	0.00930764	10	P1P2	0.167034	0.969093	10
ARHGEF11	P1P2	0.521898	0.23451	0.0662291	9	P1P2	0.180405	-0.0404265	9	P1P2	0.574666	0.811028	9
ARHGEF12	P1P2	0.980931	0.0413311	0.000345584	10	P1P2	0.970345	-0.0137009	10	P1P2	0.858236	0.175003	10
ARHGEF15	P1P2	0.0789752	-0.0269673	-0.0297317	10	P1P2	0.733287	-0.0144813	10	P1P2	0.0536205	-0.166612	10
ARHGEF16	P1P2	0.600247	0.163721	0.0362919	10	P1P2	0.00152768	-0.0629324	10	P1P2	0.701916	0.245856	10
ARHGEF17	P1P2	0.0890779	-0.165025	-0.173314	9	P1P2	0.494154	0.0135579	10	P1P2	0.286503	-0.613078	10
ARHGEF18	P1P2	0.290445	0.00293092	0.00157371	10	P1P2	0.0252746	0.0577714	10	P1P2	0.603617	0.377812	10
ARHGEF19	P1P2	0.726854	0.153961	0.0213317	10	P1P2	0.469259	-0.0421529	10	P1P2	0.703665	0.577578	10
ARHGEF2	P1P2	0.480342	-0.0267177	-0.00850826	10	P1P2	0.568987	0.0107816	10	P1P2	0.577371	-0.0178726	10
ARHGEF25	P1P2	0.47436	-0.0139809	-0.00452828	10	P1P2	0.741822	0.0196839	10	P1P2	0.636684	0.000261231	10
ARHGEF26	P1P2	0.324699	0.248131	0.121217	10	P1P2	0.386532	-0.00457656	10	P1P2	0.181899	1.12151	9
ARHGEF28	P1P2	0.737578	0.0537606	0.00710672	10	P1P2	0.881787	-0.0303431	10	P1P2	0.755492	0.106447	10
ARHGEF3	P1P2	0.687891	-0.00580847	-0.00094376	10	P1P2	0.26454	0.050172	10	P1P2	0.985302	0.367425	10
ARHGEF33	ENST00000398800.4	0.225689	-0.0474047	-0.0306466	10	ENST00000398800.4	0.527391	0.025441	10	ENST00000398800.4	0.266412	-0.0406986	10
ARHGEF35	ENST00000543357.1	0.156456	-0.100084	-0.0806285	6	ENST00000543357.1	0.488092	0.0163202	6	ENST00000378115.2	0.238571	-0.133278	10
ARHGEF37	P1	0.709183	0.223508	0.0333567	9	P2	0.372823	-0.0329689	10	P1	0.512317	1.12994	10
ARHGEF38	P1P2	0.72318	0.184247	0.0259335	10	P1P2	0.827496	-0.0224357	10	P1P2	0.830785	0.348699	10
ARHGEF39	P1P2	0.710868	0.192175	0.0284826	10	P1P2	0.300438	-0.0322341	10	P1P2	0.87052	0.822247	10
ARHGEF4	P1P2	0.0703771	0.282641	0.325763	8	P1P2	0.00670676	-0.12507	10	P1P2	0.624846	0.929148	10
ARHGEF40	P1P2	0.333231	0.265406	0.126666	10	P1P2	0.964019	-0.0182105	10	P1P2	0.33594	0.889641	10
ARHGEF5	P1P2	0.866761	0.0549827	0.00341447	9	P1P2	0.94342	-0.0106575	10	P1P2	0.845037	0.249168	9
ARHGEF6	P1P2	0.57844	0.020625	0.00490342	10	P1P2	0.0948349	-0.081799	10	P1P2	0.18185	-0.570595	10
ARHGEF7	ENST00000370623.3	0.992301	-0.00470341	-1.57876e-05	10	ENST00000370623.3	0.25265	0.0463057	10	ENST00000370623.3	0.73153	0.745516	10
ARHGEF9	P1P2	0.988013	0.0201531	0.000105553	9	P1P2	0.242173	0.0418058	9	P1P2	0.71076	0.250638	8
ARID1A	P1P2	0.623784	0.0947393	0.0194183	10	P1P2	0.100211	-0.013501	10	P1P2	0.335403	0.279553	9
ARID1B	P1	0.0899806	0.258513	0.270366	10	P1	0.251919	-0.0428366	10	P1	0.187953	1.13559	10
ARID2	P1P2	0.835009	0.172435	0.0135032	10	P1P2	0.0826744	0.0423091	10	P1P2	0.409784	1.18831	10
ARID3A	P1P2	0.86596	0.0827325	0.00517098	10	P1P2	0.235405	-0.0429733	10	P1P2	0.867968	0.298502	10
ARID3B	P1P2	0.370135	0.240945	0.104001	10	P1P2	0.0523005	0.0541548	10	P1P2	0.184615	1.38515	10
ARID3C	P1P2	0.329241	0.132275	0.0638208	10	P1P2	0.209897	-0.0248193	10	P1P2	0.412552	0.506928	10
ARID4A	P1P2	0.962347	0.0917594	0.00152947	10	P1P2	0.122895	-0.0875704	10	P1P2	0.588394	-0.0955483	10
ARID4B	P1P2	0.93103	0.0847155	0.00262926	10	P1P2	0.133393	-0.0607903	10	P1P2	0.667486	-0.0781233	10
ARID5A	P1P2	0.132889	0.258786	0.226828	10	P1P2	0.938626	-0.011564	10	P1P2	0.13932	1.1342	10
ARID5B	ENST00000279873.7	0.425593	0.031947	0.0118525	10	ENST00000279873.7	0.634534	-0.00689373	10	ENST00000279873.7	0.385289	0.160521	10
ARIH1	P1P2	0.830376	0.0240571	0.00194202	10	P1P2	0.00628523	-0.0772647	10	P1P2	0.122538	-0.401118	10
ARIH2	P1P2	0.550251	-0.0361072	-0.00936762	9	P1P2	0.273707	-0.0127326	10	P1P2	0.698531	0.272544	10
ARIH2OS	P1P2	0.189365	-0.125023	-0.0903538	9	P1P2	0.00719139	0.0635087	9	P1P2	0.802837	0.0960635	9
ARL1	P1P2	0.830144	0.113536	0.00917898	10	P1P2	0.0616305	0.0267959	10	P1P2	0.465869	0.831356	10
ARL10	P1P2	0.448288	0.215462	0.0750761	9	P1P2	0.955033	-0.00935274	9	P1P2	0.4559	1.06294	9
ARL11	P1P2	0.682002	-0.00684999	-0.00113857	9	P1P2	0.595998	0.0106216	10	P1P2	0.966967	0.0832788	10
ARL13A	P1P2	0.38549	-0.0869428	-0.0359932	9	P1P2	0.0651669	0.0275891	10	P1P2	0.669524	-0.143317	10
ARL13B	P1P2	0.28369	0.153674	0.0840835	9	P1P2	0.20493	-0.0301447	9	P1P2	0.534491	0.47729	9
ARL14	P1P2	0.212445	0.181487	0.122096	10	P1P2	0.949502	-0.0595587	10	P1P2	0.333577	0.539361	10
ARL14EP	P1P2	0.360387	0.0864088	0.0382991	10	P1P2	0.0437966	-0.09095	10	P1P2	0.160084	-0.220597	10
ARL14EPL	ENST00000601302.2	0.930676	0.184623	0.00576053	10	ENST00000601302.2	0.906422	-0.0124457	10	ENST00000601302.2	0.973312	0.820469	10
ARL15	P1P2	0.194513	0.295005	0.209764	10	P1P2	0.699051	-0.03396	10	P1P2	0.267364	1.36436	10
ARL16	P1P2	0.237667	-0.0701082	-0.0437497	9	P1P2	0.801849	0.012606	9	P1P2	0.334313	-0.347272	9
ARL17A	ENST00000329240.4,ENST00000336125.5,ENST00000445552.2	0.683962	-0.00646268	-0.00106613	10	ENST00000329240.4,ENST00000336125.5,ENST00000445552.2	0.253748	0.0232031	10	ENST00000329240.4,ENST00000336125.5,ENST00000445552.2	0.943722	0.323366	10
ARL17B	ENST00000434041.2,ENST00000450673.3,ENST00000570618.1	0.683962	-0.00646268	-0.00106613	10	ENST00000434041.2,ENST00000450673.3,ENST00000570618.1	0.253748	0.0232031	10	ENST00000434041.2,ENST00000450673.3,ENST00000570618.1	0.943722	0.323366	10
ARL2	P1P2	0.804086	0.137329	0.0130047	9	P1P2	0.0035018	-0.22357	10	P1P2	0.0599772	-0.526441	10
ARL2BP	P1P2	0.366973	-0.0595197	-0.0259129	10	P1P2	0.426727	0.0154542	10	P1P2	0.576868	-0.189961	10
ARL3	P1P2	0.238601	-0.0156411	-0.00973391	9	P1P2	0.0772697	0.0615078	9	P1P2	0.865397	0.0700396	9
ARL4A	P1P2	0.595198	-0.0193963	-0.00437073	10	P1P2	0.927994	-0.0121342	10	P1P2	0.58941	0.146311	10
ARL4C	P1P2	0.675369	0.0515367	0.00878488	10	P1P2	0.692317	-0.00904631	10	P1P2	0.749227	0.311383	10
ARL4D	P1P2	0.224781	0.292254	0.189451	10	P1P2	0.767276	0.00769134	10	P1P2	0.228281	1.43326	10
ARL5A	P1P2	0.332268	0.193246	0.0924704	9	P1P2	0.600693	-0.0431631	10	P1P2	0.364978	0.860264	10
ARL5B	P1P2	0.43996	-0.0300023	-0.0106984	10	P1P2	0.797179	-0.0243412	10	P1P2	0.330418	-0.152784	10
ARL5C	P1P2	0.992419	0.0914574	0.000302247	10	P1P2	0.172227	0.0364121	10	P1P2	0.659143	0.461813	10
ARL6	P1P2	0.525855	0.04263	0.0118995	10	P1P2	0.342648	-0.0250481	10	P1P2	0.422797	0.0652624	10
ARL6IP1	P1	0.428185	0.296519	0.109229	10	P1	0.318553	-0.032503	10	P1	0.500905	1.28673	10
ARL6IP4	P1P2	0.660891	-0.0352189	-0.00633484	10	P1P2	0.593251	0.00407575	10	P1P2	0.829406	-0.282564	10
ARL6IP5	P1P2	0.448979	0.205503	0.0714685	10	P1P2	0.103036	0.0397791	10	P1P2	0.196596	1.34901	10
ARL6IP6	P1P2	0.770827	0.101756	0.0115028	7	P1P2	0.0188861	-0.0624203	8	P1P2	0.879868	0.0765508	8
ARL8A	P1P2	0.468875	-0.0445349	-0.0146494	10	P1P2	0.713575	-0.0115716	10	P1P2	0.410538	-0.146908	10
ARL8B	P1P2	0.889839	0.0862872	0.00437378	10	P1P2	0.108744	0.0355912	10	P1P2	0.482249	0.723389	10
ARL9	P1P2	0.709652	0.163459	0.024348	10	P1P2	0.377094	0.0387261	10	P1P2	0.455034	0.658736	10
ARMC1	P1P2	0.592937	0.0530908	0.0120512	10	P1P2	0.713575	-0.0112798	10	P1P2	0.541673	-0.153759	10
ARMC10	P1P2	0.724849	0.0517863	0.00723727	10	P1P2	0.0034985	-0.0819644	10	P1P2	0.463619	-0.0296353	10
ARMC12	P1P2	0.394377	-0.0036813	-0.00148757	9	P1P2	0.702455	0.0199534	9	P1P2	0.541773	0.105225	9
ARMC2	P1P2	0.974419	0.037314	0.000419937	10	P1P2	0.854383	0.0132821	10	P1P2	0.914208	0.374023	10
ARMC3	P1P2	0.234203	0.157979	0.099591	9	P1P2	0.558483	-0.00347143	9	P1P2	0.259395	0.766282	9
ARMC4	P1P2	0.284613	-0.11283	-0.0615763	8	P1P2	0.647786	-0.0394337	10	P1P2	0.22264	-0.113333	10
ARMC5	P1P2	0.920298	0.0278225	0.0010036	10	P1P2	0.399063	-0.0221378	10	P1P2	0.691997	-0.180372	10
ARMC6	P1P2	0.441192	0.165042	0.0586515	10	P1P2	0.285469	0.0455313	10	P1P2	0.258505	0.919597	10
ARMC7	P1P2	0.265812	0.198807	0.114399	9	P1P2	0.058895	-0.0434545	9	P1P2	0.458627	0.390203	9
ARMC8	P1P2	0.728415	0.108213	0.0148924	10	P1P2	0.311827	-0.0554727	10	P1P2	0.983421	0.432428	10
ARMC9	P1P2	0.36039	-0.0181864	-0.00806069	9	P1P2	0.229942	0.0211266	10	P1P2	0.632797	0.0313792	10
ARMCX1	P1P2	0.567727	0.0134461	0.00330586	10	P1P2	0.679138	-0.0180219	10	P1P2	0.451041	0.120453	10
ARMCX2	P1P2	0.0366428	-0.117223	-0.168334	8	P1P2	0.58423	0.0258233	8	P1P2	0.0690767	-0.53474	8
ARMCX3	P1P2	0.816977	0.0333415	0.00292706	8	P1P2	0.951843	-0.0152655	10	P1P2	0.65765	0.205291	10
ARMCX4	P1P2	0.70006	0.0527679	0.0081719	10	P1P2	0.337368	-0.0419368	10	P1P2	0.474567	-0.129679	10
ARMCX5	P1P2	0.343038	0.205233	0.095363	10	P1P2	0.677632	0.00538925	10	P1P2	0.291261	1.06977	10
ARMCX5-GPRASP2	P1P2	0.343038	0.205233	0.095363	10	P1P2	0.677632	0.00538925	10	P1P2	0.291261	1.06977	10
ARMCX6	P1P2	0.129778	0.295714	0.262239	10	P1P2	0.191248	-0.0178769	10	P1P2	0.199782	1.02351	10
ARMS2	P1P2	0.373943	-0.0294718	-0.0125902	9	P1P2	0.841491	-0.0290114	10	P1P2	0.466049	-0.122826	10
ARNT	P1P2	0.4243	0.264147	0.0983488	10	P1P2	0.897811	-0.0115811	10	P1P2	0.430427	1.2355	10
ARNT2	P1P2	0.939176	0.169678	0.00462424	10	P1P2	0.134805	-0.0266108	10	P1P2	0.723783	0.529026	10
ARNTL	P1P2	0.72953	-0.090467	-0.0123901	10	P1P2	0.428268	0.0243976	10	P1P2	0.928133	-0.235367	10
ARNTL2	P1P2	0.90958	0.0680939	0.00280267	10	P1P2	0.25571	0.0340503	10	P1P2	0.549609	0.538269	10
ARPC1A	P1P2	0.194615	0.179514	0.127603	10	P1P2	0.0466531	-0.0702393	10	P1P2	0.527709	0.670468	10
ARPC1B	P1P2	0.651389	-0.0435306	-0.00810363	9	P1P2	0.386129	-0.0633252	10	P1P2	0.334388	-0.313365	10
ARPC2	P2	0.202703	-0.060032	-0.0416106	10	P2	0.57739	-0.0490667	10	P2	0.101989	-0.560622	10
ARPC3	P2	0.154582	-0.0371268	-0.0301039	10	P1	0.488787	-0.0581812	10	P2	0.202797	-0.244957	10
ARPC4	P1P2	0.366106	0.210634	0.0919193	10	P1P2	0.340857	-0.0409647	10	P1P2	0.584743	0.640546	10
ARPC4-TTLL3	P1	0.195638	0.235464	0.166837	10	P1	0.331043	0.0233683	10	P1	0.131491	1.19363	10
ARPC5	P1P2	0.502684	-0.102709	-0.0306797	10	P1P2	0.0464105	0.0366304	10	P1P2	0.942901	0.0994003	10
ARPC5L	P2	0.100271	-0.0785861	-0.0784937	10	P1	0.231027	0.0135519	10	P2	0.142381	-0.48034	10
ARPP19	P1P2	0.764836	0.01829	0.00212954	10	P1P2	0.660937	0.0151081	10	P1P2	0.958862	0.344996	10
ARPP21	ENST00000187397.4	0.160161	0.140921	0.112094	10	ENST00000187397.4	0.333755	0.022393	10	ENST00000187397.4	0.111428	0.83075	10
ARR3	P1P2	0.66229	0.1269	0.022709	10	P1P2	0.723133	0.0109025	10	P1P2	0.643219	0.66755	10
ARRB1	P1P2	0.633267	-0.00634055	-0.00125805	10	P1P2	0.718513	7.20035e-05	10	P1P2	0.69744	2.33801e-05	10
ARRB2	P1P2	0.767744	0.139213	0.0159793	9	P1P2	0.00933499	-0.116785	10	P1P2	0.331224	0.0454687	10
ARRDC1	P1P2	0.376511	0.014378	0.00609949	10	P1P2	0.566199	0.00251922	10	P1P2	0.403865	0.197639	10
ARRDC2	P1	0.0541352	-0.11354	-0.143801	10	P2	0.578495	0.00224085	10	P1	0.0461522	-0.755293	10
ARRDC3	P1P2	0.104261	0.210634	0.206817	10	P1P2	0.262157	0.0178982	10	P1P2	0.053657	1.16878	10
ARRDC4	P1P2	0.314933	-0.0736182	-0.0369403	9	P1P2	0.282234	-0.101767	10	P1P2	0.0897457	-0.650445	10
ARRDC5	P1P2	0.827297	0.204748	0.0168586	9	P1P2	0.135612	-0.0613057	10	P1P2	0.720251	0.908499	10
ARSA	P1P2	0.811787	0.0341858	0.0030958	10	P1P2	0.028877	0.0429826	10	P1P2	0.395781	0.640065	10
ARSB	P1P2	0.767443	0.126848	0.0145817	10	P1P2	0.550689	0.0126219	10	P1P2	0.510516	0.572069	10
ARSD	P1P2	0.786103	0.118004	0.0123338	10	P1P2	0.272678	0.0192994	10	P1P2	0.383115	0.84753	10
ARSE	P1P2	0.434355	0.0879456	0.03185	10	P1P2	0.206129	0.0178755	10	P1P2	0.828487	0.426468	10
ARSF	P1P2	0.914996	0.0877099	0.00338391	10	P1P2	0.0316449	0.0635133	10	P1P2	0.457885	0.663237	10
ARSG	ENST00000448504.2	0.495802	-0.0413591	-0.0126018	10	ENST00000448504.2	0.941782	-0.00177063	10	ENST00000448504.2	0.474476	-0.0515379	10
ARSH	ENST00000381130.2	0.00316615	-0.204281	-0.510594	10	ENST00000381130.2	0.2296	0.0456553	10	ENST00000381130.2	0.0111359	-0.733594	10
ARSI	P1P2	0.273061	-0.0303724	-0.0171221	10	P1P2	0.850119	-0.000678301	10	P1P2	0.28717	-0.0432052	10
ARSJ	P1P2	0.165619	-0.011143	-0.00870147	10	P1P2	0.0728594	0.0786748	10	P1P2	0.558987	0.182731	10
ARSK	P1P2	0.159544	0.216559	0.172624	10	P1P2	0.425105	-0.030362	10	P1P2	0.24016	0.834567	10
ART1	P1P2	0.965542	-0.0207465	-0.000315947	10	P1P2	0.990152	-0.00902064	10	P1P2	0.931413	0.0129331	10
ART3	P2	0.050199	-0.0754419	-0.0980221	10	P2	0.0242283	0.0425852	10	P2	0.24075	-0.101685	10
ART4	P1P2	0.723736	0.0882479	0.0123918	10	P1P2	0.444374	-0.00698919	10	P1P2	0.75594	0.410675	10
ART5	P1P2	0.684725	0.0739307	0.0121604	10	P1P2	0.682047	-0.0425511	10	P1P2	0.876906	0.24768	10
ARTN	P1	0.478439	-0.0617123	-0.0197586	9	P1	0.64913	-0.012685	9	P1	0.472495	-0.0396955	9
ARV1	P1P2	0.82945	0.0558155	0.00453278	10	P1P2	0.343621	0.0188975	10	P1P2	0.838839	0.413455	10
ARVCF	P2	0.401892	-0.0879675	-0.0348255	9	P2	0.574783	0.0178096	10	P2	0.467222	-0.229065	10
ARX	P1	0.387422	0.226769	0.0933872	10	P1	0.305265	-0.0387509	10	P1	0.470297	0.897292	10
AS3MT	P1P2	0.596947	0.0688838	0.0154344	10	P1P2	0.406748	0.0220249	10	P1P2	0.750233	0.512997	10
ASAH1	P1P2	0.16571	0.234379	0.182968	10	P1P2	0.648843	-0.0100142	10	P1P2	0.16972	1.07599	10
ASAH2	ENST00000395526.4	0.398026	0.143488	0.0574078	10	ENST00000395526.4	0.491929	-0.017197	10	ENST00000395526.4	0.475842	0.713625	10
ASAH2B	P1P2	0.775278	0.149914	0.0165718	10	P1P2	0.847356	-0.030882	10	P1P2	0.812786	0.534223	10
ASAP1	P1P2	0.349117	0.196445	0.0897812	10	P1P2	0.597935	-0.0190452	10	P1P2	0.352401	0.682948	10
ASAP2	P1P2	0.231253	0.231742	0.147368	10	P1P2	0.777959	-0.00441376	10	P1P2	0.26156	1.10265	10
ASAP3	P1P2	0.683199	-0.0333459	-0.00551717	10	P1P2	0.0205616	0.0430358	10	P1P2	0.332473	0.553642	10
ASB1	P1P2	0.832228	0.0050146	0.000399953	10	P1P2	0.655303	-0.0380329	10	P1P2	0.591445	0.0884124	10
ASB10	P1P2	0.915703	0.0259616	0.000992913	10	P1P2	0.0460086	-0.0739589	10	P1P2	0.592973	-0.163015	10
ASB11	P2	0.232528	-0.0817595	-0.0517966	10	P1	0.314718	0.0331408	10	P2	0.249245	-0.390534	10
ASB12	ENST00000362002.2	0.210275	0.280882	0.190216	10	ENST00000362002.2	0.211343	-0.0279167	10	ENST00000396130.2	0.431133	0.00318612	9
ASB13	P1P2	0.97146	0.0816909	0.00102728	10	P1P2	0.8635	-0.00702725	10	P1P2	0.998236	0.448745	10
ASB14	P1P2	0.324626	0.193316	0.0944576	10	P1P2	0.524036	-0.0394483	10	P1P2	0.478674	0.8711	10
ASB15	P1P2	0.509712	0.0210869	0.00617162	10	P1P2	0.989449	-0.0230802	10	P1P2	0.452369	-0.133411	10
ASB16	P1P2	0.310397	0.148397	0.0753981	10	P1P2	0.198689	-0.0506944	10	P1P2	0.488056	0.379291	10
ASB17	P1P2	0.974538	0.0309778	0.000346994	10	P1P2	0.521264	-0.00616359	10	P1P2	0.959802	0.223798	10
ASB18	P1P2	0.233983	0.197102	0.124335	10	P1P2	0.334343	-0.0126885	10	P1P2	0.312793	0.917023	10
ASB2	P1P2	0.467874	0.119628	0.0394618	10	P1P2	0.43498	-0.0251503	10	P1P2	0.672533	0.54376	10
ASB3	P1P2	0.117825	0.321622	0.29871	10	P1P2	0.0780741	-0.0274205	10	P1P2	0.26081	1.4785	10
ASB4	P1P2	0.662506	0.118874	0.0212559	10	P1P2	0.312038	-0.00872374	10	P1P2	0.363186	0.798669	10
ASB5	P1P2	0.263562	-0.0966699	-0.0559832	10	P1P2	0.544915	0.00286756	10	P1P2	0.424077	-0.282625	10
ASB6	P1P2	0.318826	0.234339	0.116336	10	P1P2	0.160882	-0.0519319	10	P1P2	0.394797	0.768475	10
ASB7	P1P2	0.488877	0.0481485	0.0149646	10	P1P2	0.000383371	0.0671788	10	P1P2	0.991769	0.602601	10
ASB8	P1P2	0.996091	0.0728135	0.000123849	10	P1P2	0.160268	-0.0625591	10	P1P2	0.488981	0.143874	10
ASB9	P1P2	0.446138	0.20777	0.0728297	10	P1P2	0.735944	-0.017031	10	P1P2	0.516786	1.0065	10
ASCC1	P1P2	0.818357	0.186642	0.0162486	10	P1P2	0.109069	0.0290718	10	P1P2	0.579487	1.44465	10
ASCC2	P1P2	0.258273	-0.15286	-0.0898695	10	P1P2	0.509593	-0.00382528	10	P1P2	0.227428	-0.246281	10
ASCC3	P1P2	0.739595	-0.000899821	-0.000117882	10	P1P2	0.67516	-0.024706	10	P1P2	0.590936	0.248722	10
ASCL1	P1P2	0.273321	0.161059	0.0907287	10	P1P2	0.322921	-0.0504153	10	P1P2	0.48124	0.48234	10
ASCL2	P1P2	0.398689	0.140425	0.056081	10	P1P2	0.0815621	-0.065503	10	P1P2	0.803196	0.364753	10
ASCL3	P1P2	0.333008	0.125448	0.0599072	10	P1P2	0.80695	-0.0115417	10	P1P2	0.347311	0.570793	10
ASCL4	ENST00000342331.4	0.656811	0.144177	0.0263208	9	ENST00000342331.4	0.692317	-0.0182655	10	ENST00000342331.4	0.725772	0.741	10
ASCL5	P1P2	0.783022	0.0706228	0.00750199	10	P1P2	0.1907	0.035356	10	P1P2	0.499406	0.638206	10
ASF1A	P1P2	0.0989281	0.184501	0.185364	10	P1P2	0.0262109	-0.0429854	10	P1P2	0.16597	0.659045	9
ASF1B	P1P2	0.246886	0.206422	0.125402	10	P1P2	0.00658004	-0.0948803	10	P1P2	0.688847	0.676348	10
ASGR1	P1P2	0.11772	0.2669	0.24799	10	P1P2	0.808885	0.00464693	10	P1P2	0.0649731	0.861115	10
ASGR2	P1P2	0.629889	0.0355616	0.00713851	10	P1P2	0.456277	-0.0632396	10	P1P2	0.419733	-0.135307	10
ASH1L	P1P2	0.390937	-0.0540103	-0.0220304	10	P1P2	0.0679775	-0.0462589	10	P1P2	0.230565	-0.398537	10
ASH2L	P1P2	0.309388	0.117414	0.0598218	9	P1P2	0.000277948	-0.148667	10	P1P2	0.490834	-0.187311	10
ASIC1	P1P2	0.882401	0.087091	0.00473199	8	P1P2	0.838098	-0.00294401	9	P1P2	0.643031	0.45951	9
ASIC2	ENST00000359872.6	0.225462	0.345099	0.223254	10	ENST00000359872.6	0.0604541	-0.0268722	10	ENST00000359872.6	0.388605	1.04284	10
ASIC3	P1P2	0.508441	0.141002	0.0414206	8	P1P2	0.621409	-0.0246689	9	P1P2	0.372657	0.591058	9
ASIC4	P1P2	0.112416	-0.0298022	-0.0282874	10	P1P2	0.810137	-0.0248948	10	P1P2	0.139517	-0.253382	10
ASIC5	P1P2	0.649313	0.172445	0.0323413	10	P1P2	0.969173	-0.0157428	10	P1P2	0.558789	0.805848	10
ASIP	P1P2	0.736571	0.200347	0.0266032	10	P1P2	0.59061	-0.00562714	10	P1P2	0.679969	0.533989	10
ASL	P1P2	0.0838532	-0.0941492	-0.10135	10	P1P2	0.0356312	0.0631156	10	P1P2	0.274484	0.00640938	10
ASMT	P1P2	0.174255	0.205	0.155557	10	P1P2	0.813328	0.00589329	10	P1P2	0.106131	0.915561	10
ASMTL	P1P2	0.94851	0.0441787	0.00101425	10	P1P2	0.494711	0.0337611	10	P1P2	0.631434	0.308844	10
ASNA1	P1P2	0.938996	0.110541	0.00302177	9	P1P2	0.08703	-0.0779736	10	P1P2	0.645756	0.451884	10
ASNS	P1P2	0.13637	0.00110414	0.00095539	10	P1P2	0.98769	-0.00164502	10	P1P2	0.122004	0.0065917	10
ASNSD1	P1P2	0.970749	0.077423	0.000998202	10	P1P2	0.613533	0.00933379	10	P1P2	0.825961	0.639716	10
ASPA	P1P2	0.677372	0.0321287	0.0054353	8	P1P2	0.837122	0.00250255	8	P1P2	0.824822	0.00468568	8
ASPDH	P1P2	0.376219	0.117598	0.0499276	9	P1P2	0.133735	-0.0456852	10	P1P2	0.529927	0.536857	10
ASPG	P2	0.110443	-0.11831	-0.113207	9	P2	0.323523	-0.0361372	9	P2	0.0829328	-0.740001	9
ASPH	P1P2	0.350047	-0.0442178	-0.0201577	9	P1P2	0.284277	-0.0304993	10	P1P2	0.191487	-0.170777	10
ASPHD1	P1P2	0.373235	-0.08655	-0.037045	10	P1P2	0.0420001	-0.0555953	10	P1P2	0.129542	-0.651646	10
ASPHD2	P1P2	0.376751	0.179188	0.0759659	10	P1P2	0.262595	-0.0128115	10	P1P2	0.64745	0.880133	10
ASPM	P1P2	0.884029	0.064722	0.00346479	9	P1P2	0.0820579	-0.0112685	9	P1P2	0.559931	0.036702	9
ASPN	P1P2	0.309194	0.00377957	0.00192671	10	P1P2	0.22603	0.0380342	10	P1P2	0.545389	0.124308	10
ASPRV1	ENST00000320256.4	0.461798	0.148098	0.0496938	10	ENST00000320256.4	0.699704	0.0306059	10	ENST00000320256.4	0.422456	0.897816	10
ASPSCR1	P1P2	0.210438	0.225503	0.152637	10	P1P2	0.719722	-0.00308754	10	P1P2	0.327643	1.03994	10
ASRGL1	P1P2	0.0364498	0.310765	0.446974	10	P1P2	0.214419	-0.0430059	10	P1P2	0.0549864	1.29038	10
ASS1	P1P2	0.296517	-0.133093	-0.0702665	10	P1P2	0.806722	-0.00365406	10	P1P2	0.271518	-0.57348	10
ASTE1	P1P2	0.775619	0.0361779	0.00399229	10	P1P2	0.523844	-0.0273379	10	P1P2	0.639737	0.125937	10
ASTL	ENST00000342380.2	0.84999	0.0553349	0.00390588	10	ENST00000342380.2	0.486483	-0.0285917	10	ENST00000342380.2	0.876674	0.104392	10
ASTN1	P1P2	0.879642	0.0617157	0.00343721	10	P1P2	0.65117	-0.00353578	10	P1P2	0.927313	0.00757738	10
ASTN2	P1P2	0.485899	-0.0296304	-0.00928777	10	P1P2	0.680107	0.00192655	10	P1P2	0.485378	-0.052079	10
ASUN	P1P2	0.937502	0.115011	0.0032235	9	P1P2	0.531015	-0.0325348	9	P1P2	0.695865	0.108311	9
ASXL1	P1P2	0.672226	0.0867974	0.0149712	10	P1P2	0.54238	-0.0386273	10	P1P2	0.752581	0.347084	10
ASXL2	P1P2	0.321935	0.196727	0.0968353	10	P1P2	0.887007	-0.00663528	10	P1P2	0.315556	0.949695	10
ASXL3	P1P2	0.811307	0.0856952	0.00778238	8	P1P2	0.303157	-0.0393774	8	P1P2	0.985141	0.259236	8
ASZ1	P1P2	0.433047	0.145166	0.0527627	10	P1P2	0.776607	0.00405948	10	P1P2	0.410957	0.705934	10
ATAD1	P1P2	0.754776	0.103608	0.012659	10	P1P2	0.717744	0.00544389	10	P1P2	0.538944	0.627963	10
ATAD2	P1P2	0.273841	0.145763	0.0819917	10	P1P2	0.958749	-0.0128508	10	P1P2	0.233675	0.661294	10
ATAD2B	P1P2	0.928316	0.101199	0.00326915	10	P1P2	0.978313	-0.0282935	10	P1P2	0.773068	0.188964	9
ATAD3A	P1P2	0.296461	-0.0417009	-0.0220194	9	P1P2	0.195627	-0.0767134	10	P1P2	0.126843	-0.397364	10
ATAD3B	P1	0.137853	0.170696	0.146898	9	P1	0.391467	0.0311343	10	P1	0.0317034	1.09372	9
ATAD3C	P1P2	0.935427	0.0841648	0.00243995	8	P1P2	0.872448	0.015895	8	P1P2	0.648595	0.534696	8
ATAD5	P1P2	0.74111	0.0767627	0.00998817	9	P1P2	0.438879	-0.0387989	9	P1P2	0.982026	0.401489	9
ATAT1	P1P2	0.238565	0.249878	0.155523	10	P1P2	0.175342	0.0319315	10	P1P2	0.12721	1.28218	10
ATCAY	P1P2	0.466237	0.0847683	0.0280916	10	P1P2	0.885615	-0.0222494	10	P1P2	0.473838	0.403398	10
ATE1	P1P2	0.0745961	-0.163865	-0.184722	10	P1P2	0.10009	0.0446581	10	P1P2	0.197928	-0.489337	10
ATF1	P1P2	0.477116	0.148097	0.0475949	10	P1P2	0.988628	0.0194403	10	P1P2	0.293155	0.586124	9
ATF2	P1P2	0.0758569	-0.10338	-0.115786	9	P1P2	0.124041	-0.0511829	10	P1P2	0.0373576	-0.555974	10
ATF3	P1P2	0.312602	0.220941	0.111577	9	P1P2	0.40958	-0.0512555	10	P1P2	0.306337	0.939296	10
ATF4	P1P2	0.590475	0.0725556	0.0166006	10	P1P2	0.360576	0.0162917	10	P1P2	0.660424	0.508167	10
ATF5	P1P2	0.280597	0.224807	0.124075	8	P1P2	2.59037e-05	-0.317079	10	P1P2	0.0355253	-0.798044	10
ATF6	P1P2	0.395132	0.204398	0.082425	10	P1P2	0.051012	-0.0403508	10	P1P2	0.671243	0.530936	10
ATF6B	P1P2	0.110813	-0.149515	-0.142849	10	P1P2	0.0835101	0.0388046	10	P1P2	0.264262	-0.260863	10
ATF7	P1P2	0.523726	0.0969627	0.0272364	10	P1P2	0.578897	-0.0126308	10	P1P2	0.47712	0.371576	10
ATF7IP	P1	0.237738	-0.115853	-0.0722808	10	P2	0.433253	0.0109971	10	P1	0.370543	-0.216989	10
ATF7IP2	P1P2	0.160604	0.228296	0.181323	10	P1P2	0.100393	-0.0523248	10	P1P2	0.342269	0.953754	10
ATG10	P1P2	0.967542	0.0385663	0.000552666	9	P1P2	0.0203857	-0.0344342	10	P1P2	0.54784	-0.109781	10
ATG12	P1P2	0.815013	0.0468952	0.00416597	10	P1P2	0.657214	-0.0275496	10	P1P2	0.81931	0.182792	10
ATG13	P1P2	0.34168	0.203304	0.0948169	10	P1P2	0.978313	0.0103194	10	P1P2	0.192591	0.893867	10
ATG14	P1P2	0.440048	-0.0119485	-0.00425964	10	P1P2	0.554128	-0.00887823	10	P1P2	0.312087	-0.0283617	10
ATG16L1	P1P2	0.0301676	-0.159326	-0.242249	10	P1P2	0.467997	0.0049962	10	P1P2	0.0507639	-0.660142	10
ATG16L2	P1P2	0.869815	0.0315259	0.00190962	10	P1P2	0.392035	0.0331472	10	P1P2	0.84195	0.638424	10
ATG2A	P1P2	0.0564767	0.266554	0.332694	9	P1P2	0.69145	-0.0029457	10	P1P2	0.0787642	1.24675	10
ATG2B	P1P2	0.840461	0.108411	0.00818313	10	P1P2	0.438272	-0.0401084	10	P1P2	0.936217	0.368961	10
ATG3	P1P2	0.302115	-0.0337766	-0.017558	10	P1P2	0.508179	0.0114497	10	P1P2	0.435962	-0.0827679	10
ATG4A	P1P2	0.376591	0.242187	0.102719	10	P1P2	0.962613	-0.00989237	10	P1P2	0.297846	1.44226	10
ATG4B	P1P2	0.836821	0.0106802	0.000826305	9	P1P2	0.985787	0.00397929	9	P1P2	0.898499	0.13115	9
ATG4C	P1P2	0.926311	0.054753	0.00182017	10	P1P2	0.0983429	0.0603125	10	P1P2	0.594503	0.720961	10
ATG4D	P1P2	0.472803	0.0369464	0.0120194	10	P1P2	0.274481	-0.0207742	10	P1P2	0.349584	0.0785542	10
ATG5	P1P2	0.736267	0.000862373	0.000114665	9	P1P2	0.304157	-0.0670508	10	P1P2	0.694063	0.00312508	10
ATG7	P1P2	0.084306	-0.158911	-0.170693	10	P1P2	0.744266	-0.0154968	10	P1P2	0.0572629	-0.595265	10
ATG9A	P1P2	0.31789	0.0236717	0.0117819	10	P1P2	0.833225	-0.00599144	10	P1P2	0.450775	0.0690701	10
ATG9B	P1P2	0.322516	0.17793	0.0874433	10	P1P2	0.111956	0.0565292	10	P1P2	0.1655	1.41738	10
ATHL1	P1P2	0.203124	0.167437	0.115906	10	P1P2	0.86766	-0.00148605	10	P1P2	0.157427	0.825206	10
ATIC	P1P2	0.966868	0.0303935	0.000444747	7	P1P2	0.00370163	-0.203307	10	P1P2	0.215677	-0.142375	10
ATL1	P1P2	0.423182	0.187954	0.0701958	10	P1P2	0.276811	0.0211966	10	P1P2	0.304529	1.0665	10
ATL2	P1P2	0.433744	0.236661	0.0858529	10	P1P2	0.7871	-0.00931211	10	P1P2	0.396191	1.05345	10
ATL3	P1P2	0.241655	0.115147	0.071023	10	P1P2	0.387113	-0.0351497	9	P1P2	0.114677	0.552616	10
ATM	P1P2	0.513245	0.0895157	0.0259305	10	P1P2	0.993786	-0.00328068	10	P1P2	0.558789	0.330656	10
ATMIN	P1P2	0.731986	0.0326113	0.00441873	10	P1P2	0.960857	-0.0173077	10	P1P2	0.715844	0.0550878	10
ATN1	P1P2	0.377633	0.124866	0.0528098	10	P1P2	0.983704	0.00149634	10	P1P2	0.354465	0.656276	10
ATOH1	P1P2	0.998223	0.115076	8.88749e-05	10	P1P2	0.276033	0.0113775	10	P1P2	0.81931	0.585588	10
ATOH7	P1P2	0.229801	0.309174	0.197453	9	P1P2	0.963902	-0.00591734	10	P1P2	0.229935	1.60246	10
ATOH8	P1P2	0.668655	0.143069	0.0250081	10	P1P2	0.348434	0.019879	10	P1P2	0.61021	0.725601	10
ATOX1	P1P2	0.724849	0.148291	0.0207241	10	P1P2	0.0185068	-0.0690863	10	P1P2	0.328008	0.418663	10
ATP10A	P1P2	0.500863	-0.0535907	-0.0160923	9	P1P2	0.734504	0.00804159	10	P1P2	0.932584	-0.0158552	10
ATP10B	P1P2	0.379562	0.102191	0.0429936	10	P1P2	0.108906	0.0193721	10	P1P2	0.61238	0.593049	10
ATP10D	P1P2	0.819626	0.190606	0.0164654	10	P1P2	0.0375839	0.0878614	10	P1P2	0.366227	1.17543	10
ATP11A	P1P2	0.718523	-0.00957127	-0.00137405	9	P1P2	0.602534	0.0112466	10	P1P2	0.985537	0.287845	10
ATP11B	P1P2	0.339499	0.146828	0.0688862	9	P1P2	0.996483	-0.0656525	10	P1P2	0.58282	0.348296	10
ATP11C	ENST00000361648.2	0.362887	0.248598	0.10944	10	ENST00000361648.2	0.896998	-0.0277325	10	ENST00000361648.2	0.417529	1.10159	10
ATP12A	P1P2	0.653163	0.0253278	0.00468509	10	P1P2	0.653818	-0.0320923	10	P1P2	0.684402	0.175218	10
ATP13A1	P1P2	0.365162	0.231426	0.101252	10	P1P2	0.0259741	-0.075419	10	P1P2	0.814387	0.380493	10
ATP13A2	P1P2	0.386862	-0.0489241	-0.0201784	9	P1P2	0.789538	0.00597018	9	P1P2	0.38537	-0.0629953	10
ATP13A3	P1P2	0.687018	0.26476	0.0431644	10	P1P2	0.337072	-0.0481248	10	P1P2	0.888538	1.23023	10
ATP13A4	P1P2	0.366588	-0.0464208	-0.0202312	9	P1P2	0.0535433	-0.0543811	10	P1P2	0.121649	-0.425964	10
ATP13A5	P1P2	0.582981	0.0191632	0.00449081	8	P1P2	0.223282	-0.0453608	10	P1P2	0.490278	0.128799	10
ATP1A1	P1P2	0.269504	0.377293	0.214844	10	P1P2	0.00144853	-0.082373	10	P1P2	0.663309	0.588169	10
ATP1A2	P2	0.240602	-0.0540239	-0.0334246	9	P2	0.224913	0.0182189	9	P2	0.33408	-0.0949818	9
ATP1A3	P1P2	0.285522	0.198034	0.107802	9	P1P2	0.15909	-0.069816	10	P1P2	0.375922	0.74295	10
ATP1A4	P1	0.83385	0.246644	0.0194632	10	P1	0.080081	-0.0509376	10	P1	0.549117	0.551734	10
ATP1B1	P1P2	0.998502	0.044102	2.87224e-05	9	P1P2	0.192851	-0.0476302	10	P1P2	0.669739	-0.00836775	10
ATP1B2	P1P2	0.232423	0.0892129	0.0565361	9	P1P2	0.41172	0.0217882	9	P1P2	0.218909	0.658413	9
ATP1B3	P1P2	0.0163523	-0.117823	-0.210481	10	P1P2	0.569785	0.0162701	10	P1P2	0.0236654	-0.492882	10
ATP1B4	P1P2	0.0101903	-0.151996	-0.302747	10	P1P2	0.721152	0.00686807	10	P1P2	0.014345	-0.580837	10
ATP2A1	P1P2	0.22866	0.240222	0.153936	10	P1P2	0.284608	0.0215396	10	P1P2	0.0894441	1.22952	9
ATP2A2	P1P2	0.287004	0.116441	0.0631241	10	P1P2	0.424337	-0.0119315	10	P1P2	0.329979	0.785863	10
ATP2A3	P1P2	0.399174	-0.0456677	-0.018214	9	P1P2	0.689629	0.0226214	9	P1P2	0.501009	-0.0648235	9
ATP2B1	P1P2	0.147484	-0.104579	-0.0869318	7	P1P2	0.834227	-0.0602769	9	P1P2	0.0846566	-0.555795	9
ATP2B2	P2	0.121495	0.216016	0.19775	10	P1	0.283485	0.0109881	10	P2	0.0991193	1.09631	10
ATP2B3	P1P2	0.46842	0.061514	0.0202605	10	P1P2	0.110374	0.0477871	10	P1P2	0.998707	0.682514	10
ATP2B4	P1P2	0.409937	0.0150623	0.00583338	9	P1P2	0.547496	-0.0048121	9	P1P2	0.49864	-0.0333442	9
ATP2C1	P1P2	0.11309	0.211062	0.199786	10	P1P2	0.42255	-0.0388446	10	P1P2	0.203372	0.627961	10
ATP2C2	P1P2	0.0967614	-0.0759287	-0.0770143	10	P1P2	0.700575	-0.00468139	10	P1P2	0.0927684	-0.331648	10
ATP4A	P1	0.0948381	0.365451	0.373863	10	P1	0.560544	0.00127359	10	P1	0.22254	1.40226	9
ATP4B	P1P2	0.327646	-0.0302798	-0.0146734	8	P1P2	0.268652	-0.140708	10	P1P2	0.138729	-0.238215	10
ATP5A1	P1	0.761667	0.00595605	0.000704213	10	P1	0.537716	0.0228018	10	P2	0.673286	0.21075	10
ATP5B	P1P2	0.95797	0.0633149	0.00118071	10	P1P2	0.0142468	-0.13672	10	P1P2	0.202222	-0.404267	10
ATP5C1	P1P2	0.70921	0.199181	0.0297229	10	P1P2	0.915976	-0.0227847	10	P1P2	0.892848	0.561404	10
ATP5D	P1P2	0.727857	0.275418	0.037995	10	P1P2	0.707228	0.00345737	10	P1P2	0.561767	1.21276	10
ATP5E	P1P2	0.511576	0.121009	0.0352246	9	P1P2	0.193303	-0.0853302	10	P1P2	0.627352	0.316278	10
ATP5F1	P1P2	0.396784	0.00449128	0.00180301	10	P1P2	0.0299937	-0.101472	10	P1P2	0.0754371	-0.546943	10
ATP5G1	P1P2	0.924896	0.0690225	0.00234036	10	P1P2	0.152708	-0.0284983	10	P1P2	0.724998	-0.0046756	10
ATP5G2	P1P2	0.333973	0.263297	0.125405	10	P1P2	0.800129	-0.00638476	10	P1P2	0.273579	1.24439	10
ATP5G3	P1P2	0.435375	-0.0368525	-0.0133088	9	P1P2	0.208139	-0.0532664	10	P1P2	0.186426	-0.506668	10
ATP5H	P1P2	0.437941	-0.0146298	-0.00524603	10	P1P2	0.7271	0.0139597	10	P1P2	0.484273	0.126631	10
ATP5I	P1P2	0.820318	0.189532	0.0163031	10	P1P2	0.0144458	-0.132183	10	P1P2	0.558888	0.0833479	10
ATP5J	P1P2	0.338898	0.142043	0.0667502	10	P1P2	0.691342	-0.0008257	10	P1P2	0.267428	0.728073	10
ATP5J2	P1P2	0.00123735	0.339141	0.986056	9	P1P2	2.6551e-05	-0.207634	10	P1P2	0.394961	0.75019	10
ATP5J2-PTCD1	P1	0.000405261	0.366978	1.24489	10	P1	2.69328e-05	-0.191086	10	P2	0.046249	-0.342414	10
ATP5L	P1P2	0.822397	0.0309265	0.00262624	10	P1P2	0.0924481	-0.0553919	10	P1P2	0.73286	0.0772033	10
ATP5L2	ENST00000505920.1	0.223028	0.168749	0.109964	10	ENST00000505920.1	0.858073	-0.0126498	10	ENST00000505920.1	0.197415	0.815431	10
ATP5O	P1P2	0.208981	-0.0585665	-0.0398189	10	P1P2	0.352833	-0.0552585	10	P1P2	0.0822617	-0.619117	10
ATP5S	P1P2	0.573678	0.236977	0.05719	10	P1P2	0.639254	-0.0148177	10	P1P2	0.510232	1.22622	10
ATP5SL	P1P2	0.108572	0.208629	0.201177	10	P1P2	0.687877	-0.0439361	10	P1P2	0.255905	0.993002	10
ATP6AP1	P1P2	0.0951833	0.252595	0.258011	9	P1P2	0.000152047	-0.200807	10	P1P2	0.770999	-0.126977	10
ATP6AP1L	P1P2	0.675586	0.014075	0.00239725	10	P1P2	0.657108	0.023618	10	P1P2	0.819997	0.269259	10
ATP6AP2	P1P2	0.133424	-0.126412	-0.110581	9	P1P2	0.0402355	0.0604251	9	P1P2	0.35655	-0.164909	9
ATP6V0A1	P1P2	0.521505	0.0166956	0.00472055	10	P1P2	0.2705	-0.0345266	10	P1P2	0.281338	0.0228139	10
ATP6V0A2	P1P2	0.422495	0.1855	0.0694101	10	P1P2	0.466556	-0.00909604	10	P1P2	0.483445	0.586887	10
ATP6V0A4	P1	0.343416	0.167135	0.0775804	10	P2	0.140728	0.024375	10	P1	0.330345	1.00618	10
ATP6V0B	P1P2	0.0398305	-0.0906467	-0.126886	10	P1P2	0.183918	-0.0497788	10	P1P2	0.010004	-0.518043	10
ATP6V0C	P1P2	0.00575535	0.292305	0.654741	10	P1P2	0.000265086	-0.124368	10	P1P2	0.135767	0.822916	10
ATP6V0D1	P1P2	0.424128	-0.0321588	-0.0119792	10	P1P2	0.533941	0.0023788	10	P1P2	0.525208	0.0123083	10
ATP6V0D2	P1P2	0.327375	0.170824	0.0828418	9	P1P2	0.776832	-0.0175911	10	P1P2	0.299559	0.739955	10
ATP6V0E1	P1P2	0.66952	-0.0319077	-0.00555949	10	P1P2	0.0723679	-0.0481631	10	P1P2	0.358539	-0.341848	10
ATP6V0E2	P1P2	0.791817	0.109722	0.0111231	10	P1P2	0.966947	-0.0487761	10	P1P2	0.645333	0.398761	10
ATP6V1A	P1P2	0.103276	0.245402	0.241967	8	P1P2	3.13703e-05	-0.286027	10	P1P2	0.170133	-0.14487	10
ATP6V1B1	P1P2	0.745094	0.0224305	0.00286638	10	P1P2	0.906073	0.00733544	10	P1P2	0.833659	0.117775	10
ATP6V1B2	P1P2	0.94507	-0.00708548	-0.00017385	8	P1P2	1.65819e-05	-0.253703	10	P1P2	0.00218544	-0.949178	10
ATP6V1C1	P1P2	0.415638	0.0927678	0.0353709	6	P1P2	6.36382e-07	-0.243768	10	P1P2	0.0056475	-0.753961	10
ATP6V1C2	P1P2	0.465692	0.147162	0.0488433	10	P1P2	0.910731	-0.00966755	10	P1P2	0.396765	0.828247	10
ATP6V1D	P1P2	0.59068	0.0996663	0.0227885	10	P1P2	0.355428	-0.0296526	10	P1P2	0.80445	0.374309	10
ATP6V1E1	P1P2	0.769179	0.193845	0.022093	9	P1P2	0.819948	-0.0348648	10	P1P2	0.749339	0.81144	10
ATP6V1E2	P1P2	0.83988	0.0495125	0.00375219	10	P1P2	0.74271	-0.00423398	10	P1P2	0.850605	0.264801	10
ATP6V1F	P1P2	0.94721	0.140097	0.00329981	10	P1P2	0.117704	-0.0737741	10	P1P2	0.675546	0.349893	10
ATP6V1G1	P1P2	0.910522	0.0153319	0.000624153	10	P1P2	0.0257488	-0.122855	10	P1P2	0.157947	-0.20104	10
ATP6V1G2	P1P2	0.471157	0.159435	0.0521088	10	P1P2	0.643145	-0.00276633	10	P1P2	0.388686	0.963793	10
ATP6V1G3	P1P2	0.190423	-0.0588777	-0.0424085	9	P1P2	0.768623	-0.00911861	10	P1P2	0.273838	-0.129458	10
ATP6V1H	P1P2	0.553826	0.0238512	0.00612085	10	P1P2	0.117085	-0.0575439	10	P1P2	0.291463	-0.56926	10
ATP7A	P1P2	0.446936	0.144334	0.0504815	10	P1P2	0.000401081	-0.115226	10	P1P2	0.579185	-0.0302615	10
ATP7B	P1P2	0.124779	0.30245	0.273372	10	P1P2	0.347453	-0.00758971	10	P1P2	0.165275	1.42959	10
ATP8A1	P1P2	0.767329	0.0561706	0.00646064	10	P1P2	0.633383	-0.0188672	10	P1P2	0.649994	0.255832	10
ATP8A2	P1P2	0.115507	0.305592	0.286459	10	P1P2	0.308814	-0.0577822	10	P1P2	0.192994	0.893693	10
ATP8B1	P1P2	0.538327	-0.01998	-0.00537369	10	P1P2	0.536359	-0.0413586	10	P1P2	0.331224	-0.120007	10
ATP8B2	P2	0.385956	0.282493	0.1168	10	P2	0.153426	-0.0561499	10	P1	0.646179	0.742337	10
ATP8B3	P1P2	0.585361	0.0593861	0.0138118	10	P1P2	0.660086	-0.0153594	10	P1P2	0.637841	0.706345	10
ATP8B4	P1P2	0.543897	0.125121	0.0330925	9	P1P2	0.0901376	-0.0639003	10	P1P2	0.75538	0.349181	10
ATP9A	P1P2	0.984891	0.0731964	0.000483957	9	P1P2	0.611596	0.0255335	9	P1P2	0.974715	0.575021	9
ATP9B	P1P2	0.148776	-0.0685189	-0.0566972	10	P1P2	0.143603	0.0449969	10	P1P2	0.327643	-0.0885614	10
ATPAF1	P1P2	0.156266	0.221519	0.178574	10	P1P2	0.801947	0.00483884	10	P1P2	0.209085	1.09119	10
ATPAF2	P1P2	0.997394	0.0501584	5.68394e-05	10	P1P2	0.659447	-0.0159801	10	P1P2	0.878301	-0.158219	10
ATPIF1	P1P2	0.37499	-0.0402739	-0.0171559	10	P1P2	0.328563	-0.0441912	10	P1P2	0.25137	-0.538497	10
ATR	P1P2	0.0797378	-0.0949921	-0.104333	10	P1P2	0.00900461	-0.179978	10	P1P2	0.000764106	-0.806828	10
ATRAID	P1P2	0.340174	0.116779	0.0546875	10	P1P2	0.77042	-0.0394002	10	P1P2	0.635738	0.682021	10
ATRIP	P1P2	0.504863	-0.00946912	-0.00281069	10	P1P2	0.473692	0.00611072	10	P1P2	0.722678	0.255947	10
ATRN	P1P2	0.370589	-0.0716347	-0.0308823	9	P1P2	0.199558	0.0123608	9	P1P2	0.397302	0.468818	9
ATRNL1	P1P2	0.738978	0.0028969	0.000380561	8	P1P2	0.161849	0.0117864	10	P1P2	0.952053	0.277796	10
ATRX	P1P2	0.794792	0.0587712	0.0058622	10	P1P2	0.494339	-0.0427438	10	P1P2	0.812672	0.351226	10
ATXN1	P1P2	0.714631	0.0803882	0.0117301	10	P1P2	0.963082	-0.0316108	10	P1P2	0.928953	0.378084	10
ATXN10	P1P2	0.940948	0.041125	0.00108712	10	P1P2	0.917142	-0.0356842	10	P1P2	0.720471	0.0416565	10
ATXN1L	P1P2	0.362119	-0.0692307	-0.030541	9	P1P2	0.820588	-0.0144039	9	P1P2	0.347625	-0.385447	9
ATXN2	P1P2	0.666927	0.148493	0.0261232	10	P1P2	0.222501	0.0322109	10	P1P2	0.50853	0.724818	10
ATXN2L	P1P2	0.920416	0.066709	0.00240259	10	P1P2	0.765594	-0.0411723	10	P1P2	0.99318	0.20123	10
ATXN3	P1P2	0.65749	-0.0113647	-0.00206963	9	P1P2	0.286265	0.0103318	10	P1P2	0.79409	0.372703	10
ATXN3L	P1P2	0.15749	0.13684	0.109848	9	P1P2	0.625868	-0.0549657	10	P1P2	0.26934	0.722171	10
ATXN7	ENST00000538065.1	0.892655	0.088389	0.00435902	10	ENST00000538065.1	0.126393	-0.0414966	10	ENST00000398590.3	0.601871	-0.0895314	10
ATXN7L1	P1P2	0.476472	0.0818752	0.0263607	10	P1P2	0.116263	0.0855103	10	P1P2	0.979672	0.443898	9
ATXN7L2	P1P2	0.542157	0.143951	0.038273	10	P1P2	0.915743	-0.00564458	10	P1P2	0.622969	0.74623	10
ATXN7L3	P1P2	0.100118	-0.147012	-0.146937	10	P1P2	0.539851	0.00855175	10	P1P2	0.095023	-0.555955	10
ATXN7L3B	P1P2	0.444177	0.163912	0.0577698	9	P1P2	0.0383187	-0.062919	10	P1P2	0.49204	0.63926	10
AUH	P1P2	0.72318	0.116934	0.0164589	10	P1P2	0.70843	-0.0640072	10	P1P2	0.831474	0.790494	10
AUNIP	P1P2	0.900237	0.0745169	0.00340117	9	P1P2	0.0174718	-0.0456265	10	P1P2	0.589003	0.216644	10
AUP1	P1P2	0.571859	0.246102	0.0597316	10	P1P2	0.135304	-0.0372958	10	P1P2	0.740862	0.948241	10
AURKA	P1P2	0.382088	0.181129	0.0756823	7	P1P2	1.68366e-07	-0.266263	10	P1P2	0.00941059	-0.181336	10
AURKAIP1	P1P2	0.703913	0.0834274	0.0127211	10	P1P2	0.556888	0.00238887	10	P1P2	0.810043	0.178253	10
AURKB	P1P2	0.072316	0.216208	0.246643	4	P1P2	6.07118e-08	-0.418558	10	P1P2	0.00127131	-1.36259	10
AURKC	P1P2	0.668115	0.0468457	0.00820497	10	P1P2	0.596814	0.00364881	10	P1P2	0.744539	0.372026	10
AUTS2	P1P2	0.71747	0.119389	0.0172155	9	P1P2	0.500486	-0.0544084	10	P1P2	0.887374	0.642631	10
AVEN	P1P2	0.523017	0.0809754	0.0227933	9	P1P2	0.872403	-0.0573978	10	P1P2	0.716614	0.241787	10
AVIL	P1P2	0.248282	-0.0172143	-0.0104156	10	P1P2	0.609102	0.0286005	10	P1P2	0.435602	-0.0442929	9
AVL9	P1P2	0.108019	0.21225	0.20514	9	P1P2	1.73007e-06	-0.216974	10	P1P2	0.0726472	-0.274503	10
AVP	P1P2	0.505053	0.14195	0.0421114	10	P1P2	0.670977	0.0261128	10	P1P2	0.495763	0.822728	10
AVPI1	P1P2	0.254551	-0.0475392	-0.028249	9	P1P2	0.812872	-0.00402906	10	P1P2	0.211122	-0.120403	10
AVPR1A	P1P2	0.442955	0.31326	0.110782	10	P1P2	0.999883	-0.0610617	10	P1P2	0.516596	0.852609	10
AVPR1B	P1P2	0.874141	0.022115	0.00129192	10	P1P2	0.290133	-0.0244571	10	P1P2	0.728428	-0.153927	10
AVPR2	P1P2	0.495802	0.115605	0.0352239	10	P1P2	0.617564	0.00689999	10	P1P2	0.604748	0.583649	10
AWAT1	P1P2	0.878119	0.0466659	0.00263412	10	P1P2	0.0428225	-0.0505827	10	P1P2	0.472566	0.0953057	10
AWAT2	P1P2	0.35813	0.273604	0.122016	10	P1P2	0.314294	0.0254468	10	P1P2	0.236756	1.37337	10
AXDND1	P1P2	0.187361	0.221565	0.161149	10	P1P2	0.570483	-0.0173128	10	P1P2	0.174301	0.935051	10
AXIN1	P1P2	0.282377	-0.0635644	-0.0349077	8	P1P2	0.656198	0.00238682	8	P1P2	0.301265	-0.268035	8
AXIN2	P1	0.0319096	-0.116769	-0.174696	9	P2	0.241799	0.0530799	9	P1	0.0681474	-0.753261	9
AXL	P1P2	0.768804	0.0143927	0.00164343	10	P1P2	0.406582	-0.07198	10	P1P2	0.388929	-0.507087	10
AZGP1	P1P2	0.169064	-0.0699798	-0.0540209	9	P1P2	0.963433	-0.0211948	10	P1P2	0.244254	-0.286636	10
AZI1	P1P2	0.85901	0.204054	0.0134679	9	P1P2	0.189904	-0.0366711	10	P1P2	0.725551	0.991144	10
AZI2	P1P2	0.0750565	0.266504	0.299714	10	P1P2	0.738271	0.0107519	10	P1P2	0.0770491	1.66632	10
AZIN1	P1P2	0.771074	0.0992083	0.011201	10	P1P2	0.0426119	0.0662297	10	P1P2	0.660317	0.680273	10
AZU1	P2	0.405527	0.181123	0.0709966	10	P1	0.0984625	0.0135604	10	P1	0.610726	0.483119	10
B2M	P2	0.742062	0.0243449	0.00315412	10	P2	0.497873	-0.0144948	10	P2	0.65552	0.20526	10
B3GALNT1	P1P2	0.994506	0.0412903	9.87981e-05	9	P1P2	0.990977	-0.0210574	9	P1P2	0.833379	0.0832536	9
B3GALNT2	P1P2	0.21584	-0.0706322	-0.0470317	10	P1P2	0.596916	-0.0105076	10	P1P2	0.172393	-0.272538	10
B3GALT1	P1P2	0.76835	0.0603843	0.00691044	10	P1P2	0.330385	-0.0336609	10	P1P2	0.595626	0.130841	10
B3GALT2	P1P2	0.779489	-0.0386652	-0.00418319	10	P1P2	0.520882	-0.0497553	10	P1P2	0.405694	-0.306771	10
B3GALT4	P1P2	0.482283	0.152329	0.0482424	10	P1P2	0.794571	-0.000859488	10	P1P2	0.563756	0.913539	10
B3GALT5	ENST00000343118.4,ENST00000398714.2	0.528182	0.269698	0.0747646	10	ENST00000343118.4,ENST00000398714.2	0.0771353	0.0231148	10	ENST00000343118.4,ENST00000398714.2	0.353623	1.45069	10
B3GALT6	P1P2	0.617183	0.13537	0.0283717	10	P1P2	0.0874375	-0.0585547	10	P1P2	0.94208	0.845332	10
B3GALTL	P1P2	0.929968	0.0476146	0.00150138	10	P1P2	0.156368	-0.0486954	10	P1P2	0.649782	0.160197	10
B3GAT1	P1P2	0.614676	0.0647358	0.0136821	10	P1P2	0.285667	0.0437912	10	P1P2	0.810657	0.204517	9
B3GAT2	P1P2	0.682327	0.00930238	0.00154426	10	P1P2	0.819834	0.00118156	10	P1P2	0.568843	0.0861963	10
B3GAT3	P1P2	0.795823	0.0263003	0.00260856	10	P1P2	0.0409438	0.0391537	10	P1P2	0.712545	0.9716	10
B3GNT1	P1P2	0.108637	0.196939	0.189854	10	P1P2	0.405171	0.0181472	10	P1P2	0.0592988	1.33326	10
B3GNT2	P1P2	0.321382	-0.0914512	-0.0450835	9	P1P2	0.0279844	-0.112198	10	P1P2	0.0576886	-0.720342	10
B3GNT3	P1P2	0.36958	0.169996	0.0734878	10	P1P2	0.878889	-0.00408524	10	P1P2	0.420668	0.780348	10
B3GNT4	P1P2	0.295076	0.0256021	0.0135708	10	P1P2	0.463145	-0.0163357	10	P1P2	0.225166	0.0220554	10
B3GNT5	P1P2	0.303439	0.199855	0.103511	10	P1P2	0.462698	-0.0105176	10	P1P2	0.534959	0.982616	10
B3GNT6	P1P2	0.198494	-0.0364432	-0.0255923	9	P1P2	0.934769	-0.0265881	10	P1P2	0.141621	-0.146654	10
B3GNT7	P1P2	0.143108	0.188932	0.159523	8	P1P2	0.109103	-0.0949485	9	P1P2	0.406989	0.639412	9
B3GNT8	P1P2	0.233692	0.21775	0.137478	10	P1P2	0.976789	-0.0197821	10	P1P2	0.180599	0.925181	10
B3GNT9	P1P2	0.26072	-0.0589896	-0.0344397	10	P1P2	0.412423	0.0149742	10	P1P2	0.331004	-0.134235	10
B3GNTL1	P2	0.332119	-0.0389199	-0.0186312	10	P1	0.478695	0.0201996	10	P2	0.37616	-0.122717	10
B4GALNT1	P1P2	0.876013	0.037091	0.00213235	10	P1P2	0.848622	0.00578053	10	P1P2	0.825157	0.240309	10
B4GALNT2	P1P2	0.485992	-0.0267261	-0.00837518	10	P1P2	0.477601	0.0325519	10	P1P2	0.550887	0.406323	10
B4GALNT3	P1P2	0.824014	0.063245	0.00531671	10	P1P2	0.122254	-0.031417	10	P1P2	0.915378	-0.0337051	10
B4GALNT4	P1P2	0.0719057	0.172303	0.196983	10	P1P2	0.539462	-0.0109214	10	P1P2	0.0677187	0.937822	10
B4GALT1	P1P2	0.201757	0.216674	0.150626	10	P1P2	0.439054	0.0185025	10	P1P2	0.176131	1.16901	10
B4GALT2	P1P2	0.693801	0.0203626	0.00323286	10	P1P2	0.492577	-0.0160342	10	P1P2	0.592565	-0.178021	10
B4GALT3	P1P2	0.0383643	0.301501	0.426948	10	P1P2	0.487496	-0.0386341	10	P1P2	0.0483031	1.25952	10
B4GALT4	P1P2	0.721178	-0.0110525	-0.00156899	10	P1P2	0.671406	-0.0159144	10	P1P2	0.682563	-0.0877566	10
B4GALT5	P1P2	0.0437365	0.346761	0.471302	10	P1P2	0.349417	-0.0284429	10	P1P2	0.0936305	1.23076	10
B4GALT6	P1P2	0.827251	0.0960106	0.00790768	10	P1P2	0.677525	-0.00383098	10	P1P2	0.81393	0.528705	10
B4GALT7	P1P2	0.322146	0.323258	0.159026	9	P1P2	0.923442	-0.00662912	10	P1P2	0.153143	1.41385	10
B9D1	P1P2	0.930912	0.0357714	0.00111218	10	P1P2	0.957813	-0.0139556	10	P1P2	0.790683	0.179213	10
B9D2	P1P2	0.632422	0.227496	0.04527	10	P1P2	0.527967	-0.0191386	10	P1P2	0.629444	0.966211	10
BAALC	P1P2	0.0841193	-0.123216	-0.13247	10	P1P2	0.954418	-0.0222656	10	P1P2	0.0387667	-0.49334	10
BAAT	P1	0.300172	0.192123	0.100409	10	P1	0.385244	-0.0286989	10	P1	0.420328	0.695299	10
BABAM1	P1P2	0.160128	-0.0984745	-0.0783398	9	P1P2	0.153704	0.0315046	9	P1P2	0.244414	-0.244683	9
BACE1	P1P2	0.772209	0.0647757	0.00727205	10	P1P2	0.442451	-0.017284	10	P1P2	0.690801	0.255764	10
BACE2	P1P2	0.166937	-0.0758265	-0.0589511	10	P1P2	0.851617	-0.0632774	10	P1P2	0.0896899	-0.553364	10
BACH1	P1P2	0.270547	0.228649	0.129817	9	P1P2	0.517168	-0.0187959	10	P1P2	0.210531	1.23595	10
BACH2	P1P2	0.89559	0.131054	0.00627626	10	P1P2	0.429296	-0.00410151	10	P1P2	0.935237	0.468586	9
BAD	P1P2	0.394472	0.187666	0.0758141	10	P1P2	0.956291	0.00890015	10	P1P2	0.317784	0.777011	9
BAG1	P1P2	0.436802	0.00863019	0.00310441	10	P1P2	0.132029	-0.0745269	10	P1P2	0.127984	-0.283383	10
BAG2	P1P2	0.277175	-0.00639548	-0.00356385	10	P1P2	0.29161	0.041332	10	P1P2	0.383436	0.156807	10
BAG3	P1P2	0.49327	0.0719052	0.0220689	10	P1P2	0.867776	-0.0114784	10	P1P2	0.3707	0.399824	10
BAG4	P1P2	0.536467	0.137071	0.0370719	10	P1P2	0.189904	-0.0489721	10	P1P2	0.808673	0.502159	10
BAG5	P1P2	0.190258	0.260514	0.187741	10	P1P2	0.871825	-0.00831397	10	P1P2	0.173322	0.750526	10
BAG6	P1P2	0.19061	0.282012	0.203007	10	P1P2	0.711056	-0.0340399	10	P1P2	0.180216	1.24666	10
BAGE	P1P2	0.219274	0.22563	0.148693	10	P1P2	0.447706	-0.0503237	10	P1P2	0.368813	0.993407	10
BAGE3	P1P2	0.142005	0.194583	0.164947	10	P1P2	0.501327	-0.0084406	10	P1P2	0.127652	1.03	10
BAGE4	P1P2	0.142005	0.194583	0.164947	10	P1P2	0.501327	-0.0084406	10	P1P2	0.127652	1.03	10
BAGE5	P1P2	0.142005	0.194583	0.164947	10	P1P2	0.501327	-0.0084406	10	P1P2	0.127652	1.03	10
BAHCC1	P1P2	0.802245	0.0222747	0.00213153	10	P1P2	0.665202	-0.0143041	10	P1P2	0.80833	0.235902	10
BAHD1	P1P2	0.000198424	0.551697	2.0426	10	P1P2	5.86657e-07	-0.211501	10	P1P2	0.0210534	1.54686	10
BAI1	P1P2	0.571557	0.139388	0.0338629	10	P1P2	0.255894	-0.0110783	10	P1P2	0.47776	0.435767	10
BAI2	P1P2	0.412241	-0.0601734	-0.0231577	6	P1P2	0.151731	-0.0894663	8	P1P2	0.360248	-0.265833	8
BAI3	P1P2	0.0489585	0.322129	0.422045	10	P1P2	0.586357	-0.0130414	10	P1P2	0.0595973	1.44469	10
BAIAP2	P1P2	0.185481	-0.121255	-0.0887226	10	P1P2	0.13868	0.0658856	10	P1P2	0.373305	0.0163007	10
BAIAP2L1	P1P2	0.0196874	0.361185	0.616114	9	P1P2	0.0937431	-0.0599744	9	P1P2	0.0520109	1.54074	9
BAIAP2L2	P2	0.122139	-0.132382	-0.120884	10	P2	0.386612	0.0044143	10	P2	0.123039	-0.376641	10
BAIAP3	P1P2	0.472803	0.119986	0.0390337	10	P1P2	0.78891	-0.0257806	10	P1P2	0.505604	0.703136	10
BAK1	P1P2	0.78713	0.0699699	0.00727361	10	P1P2	0.687012	0.0097951	10	P1P2	0.906497	0.441606	10
BAMBI	P1P2	0.833135	0.0986667	0.00782274	8	P1P2	0.446058	-0.0493048	9	P1P2	0.95589	0.197986	9
BANF1	P1P2	0.676129	0.0150554	0.00255897	10	P1P2	0.977493	0.024612	10	P1P2	0.645756	0.328778	10
BANF2	P1P2	0.702591	0.20433	0.0313232	10	P1P2	0.836208	-0.0168659	10	P1P2	0.60959	0.60123	10
BANK1	P1P2	0.979148	0.0979712	0.000896579	9	P1P2	0.229383	-0.0572915	9	P1P2	0.720715	0.277894	9
BANP	P1P2	0.581285	0.096819	0.0228116	10	P1P2	0.000405119	-0.120185	10	P1P2	0.37616	-0.212443	10
BAP1	P1P2	0.887727	0.114638	0.0059291	10	P1P2	0.102293	-0.101097	10	P1P2	0.743536	-0.118533	10
BARD1	P1P2	0.449958	-0.0497274	-0.0172469	10	P1P2	0.260597	-0.00638858	10	P1P2	0.447067	0.207781	10
BARHL1	P1P2	0.382549	-0.0516564	-0.0215569	10	P1P2	0.438272	0.0249905	10	P1P2	0.649994	-0.112791	10
BARHL2	P1P2	0.195177	0.193507	0.137307	10	P1P2	0.387338	-0.0316401	10	P1P2	0.260373	0.822376	10
BARX1	P1P2	0.00680016	0.320784	0.695293	10	P1P2	0.133621	0.0385986	10	P1P2	0.00269338	1.59873	10
BARX2	P1P2	0.181228	0.19673	0.145929	10	P1P2	0.814355	0.0132365	10	P1P2	0.119569	1.26414	10
BASP1	P1P2	0.780856	0.0934228	0.0100363	10	P1P2	0.271844	-0.031282	10	P1P2	0.889469	0.493758	10
BATF	P1P2	0.0933216	0.189519	0.195208	10	P1P2	0.220336	0.0307591	10	P1P2	0.0473704	0.88628	9
BATF2	P1P2	0.0784198	0.190598	0.21072	10	P1P2	0.423656	-0.00342668	10	P1P2	0.0795954	1.35946	10
BATF3	P1P2	0.868062	0.0545916	0.00335461	10	P1P2	0.588583	-0.0497651	10	P1P2	0.844718	0.139678	10
BAX	P1P2	0.470426	-0.035376	-0.0115859	10	P1P2	0.362354	0.0344811	10	P1P2	0.798274	-0.113513	9
BAZ1A	P1P2	0.134003	-0.135478	-0.118256	10	P1P2	0.0384698	0.0695971	10	P1P2	0.340773	-0.138675	10
BAZ1B	P1P2	0.853133	0.0530143	0.00365711	10	P1P2	0.0357474	-0.0538577	10	P1P2	0.315912	-0.447487	10
BAZ2A	P1	0.715296	0.0149219	0.00217134	10	P1	0.335079	-0.0503294	10	P2	0.568144	0.236177	10
BAZ2B	P1P2	0.8529	0.0381165	0.00263392	10	P1P2	0.35329	-0.0586247	10	P1P2	0.441976	-0.0166696	10
BBC3	P1P2	0.267001	-0.00557349	-0.00319632	10	P1P2	0.915043	-0.0095609	10	P1P2	0.272547	-0.0450894	10
BBIP1	P1P2	0.338759	-0.0868182	-0.040814	8	P1P2	0.757979	-0.0260238	10	P1P2	0.706183	-0.122893	10
BBOX1	P1	0.800456	0.0675645	0.00653096	9	P2	0.0528919	-0.0711663	10	P2	0.660317	0.0172954	10
BBS1	P1P2	0.331158	0.190992	0.0916692	10	P1P2	0.958047	-0.000880225	10	P1P2	0.446627	0.998205	10
BBS10	P1P2	0.696873	-0.00253542	-0.000397671	10	P1P2	0.15883	-0.0318526	10	P1P2	0.374731	-0.141027	10
BBS12	P1P2	0.439345	0.166678	0.0595363	10	P1P2	0.525952	0.000369558	10	P1P2	0.410957	0.70899	10
BBS2	P1P2	0.282925	0.17324	0.0949926	10	P1P2	0.52576	0.0103298	10	P1P2	0.221524	0.961754	10
BBS4	P1P2	0.259965	-0.0756456	-0.0442591	10	P1P2	0.293091	0.0331007	10	P1P2	0.472202	-0.183127	10
BBS5	P1P2	0.969921	0.112301	0.00148952	10	P1P2	0.465478	-0.00643579	10	P1P2	0.745431	0.494284	10
BBS7	P1P2	0.874726	0.0775317	0.00450677	10	P1P2	0.421786	0.00987193	10	P1P2	0.698858	0.679154	10
BBS9	P1P2	0.915703	0.0746105	0.00285351	10	P1P2	0.728756	0.00803434	10	P1P2	0.878998	0.317082	10
BBX	P1P2	0.722735	0.10105	0.0142503	10	P1P2	0.878425	0.00766278	10	P1P2	0.630701	0.472047	10
BCAM	P1P2	0.249819	0.145984	0.0879373	9	P1P2	0.370252	-0.0353925	9	P1P2	0.395658	0.653189	9
BCAN	P1P2	0.939885	0.0597566	0.00160897	10	P1P2	0.0629922	0.0366654	10	P1P2	0.678149	0.359465	9
BCAP29	P1P2	0.886438	-0.0117954	-0.000617508	10	P1P2	0.402028	-0.0528798	10	P1P2	0.612173	-0.0548055	10
BCAP31	P1P2	0.239216	0.204145	0.126817	10	P1P2	0.199152	-0.0635844	10	P1P2	0.618599	0.619875	10
BCAR1	P2	0.254479	0.222118	0.132016	10	P2	0.56094	-0.0448549	10	P2	0.228008	0.84375	9
BCAR3	P1	0.1196	-0.100622	-0.0928002	9	P1	0.524419	-0.00705105	10	P1	0.173834	-0.369475	10
BCAS1	ENST00000395961.3	0.580573	0.107117	0.0252948	10	ENST00000395961.3	0.480613	-0.00877319	10	ENST00000395961.3	0.68646	0.583078	10
BCAS2	P1P2	0.0666963	0.237129	0.278839	8	P1P2	4.24127e-05	-0.230516	10	P1P2	0.866345	-0.098855	10
BCAS3	P1P2	0.931738	0.155312	0.00476904	10	P1P2	0.430498	-0.0511371	10	P1P2	0.968964	0.512781	10
BCAS4	P1P2	0.180346	-0.121911	-0.0906891	9	P1P2	0.453116	-0.0344272	9	P1P2	0.124506	-0.630797	9
BCAT1	P1P2	0.198162	0.218682	0.153728	10	P1P2	0.599569	-0.00508323	10	P1P2	0.221803	1.23354	10
BCAT2	P1P2	0.934571	0.0442125	0.00129931	10	P1P2	0.705153	-0.0114947	10	P1P2	0.733526	0.307329	10
BCCIP	P1P2	0.794052	0.00852997	0.000854284	9	P1P2	0.844135	-0.0584355	10	P1P2	0.368813	-0.0479655	10
BCDIN3D	P1P2	0.901347	0.0669834	0.00302148	10	P1P2	0.890723	0.00930694	10	P1P2	0.911286	0.405828	10
BCHE	P1P2	0.526894	0.10031	0.0279138	9	P1P2	0.668075	0.0148212	9	P1P2	0.577317	0.336676	9
BCKDHA	P2	0.316024	0.133154	0.0666143	10	P1	0.352985	-0.104646	10	P2	0.445308	0.355386	10
BCKDHB	P1P2	0.209251	0.198257	0.134683	10	P1P2	0.933133	-0.00254021	10	P1P2	0.253079	1.14157	10
BCKDK	P1P2	0.493832	0.115078	0.0352624	10	P1P2	0.85692	0.00982544	10	P1P2	0.40611	0.610388	10
BCL10	P1P2	0.532755	0.226386	0.0619105	10	P1P2	0.296342	-0.0114663	10	P1P2	0.596443	1.05126	10
BCL11A	P1P2	0.848943	0.130384	0.0092731	10	P1P2	0.404342	0.0376534	10	P1P2	0.507679	0.949409	10
BCL11B	P1P2	0.257961	-0.0773424	-0.0455119	10	P1P2	0.299616	0.0147043	10	P1P2	0.3614	-0.291773	10
BCL2	P1P2	0.161669	0.351706	0.278331	10	P1P2	0.868585	-0.0141201	10	P1P2	0.139912	1.62504	10
BCL2A1	P1P2	0.54806	0.110972	0.0289827	9	P1P2	3.31e-07	-0.207099	10	P1P2	0.0133774	-0.949016	10
BCL2L1	P2	0.0792034	0.35124	0.386806	10	P1	0.0165682	-0.0682466	9	P2	0.0797473	1.54501	10
BCL2L10	P1P2	0.677072	0.10406	0.0176242	9	P1P2	0.799933	0.00766738	9	P1P2	0.53869	0.51921	9
BCL2L11	P2	0.346906	-0.0203239	-0.0093447	10	P2	0.746824	-0.0269839	10	P2	0.275327	-0.133799	10
BCL2L12	P1P2	0.483116	0.232983	0.0736105	10	P1P2	0.411669	0.00869158	10	P1P2	0.336384	1.20855	10
BCL2L13	P1P2	0.580843	-0.0347958	-0.00820975	9	P1P2	0.0462173	-0.0891162	10	P1P2	0.194713	-0.398507	10
BCL2L14	P1	0.0598013	0.296108	0.362226	10	P1	0.188518	-0.0691061	10	P1	0.145168	0.921621	10
BCL2L15	P1P2	0.218495	0.317598	0.209792	10	P1P2	0.499365	0.0191811	10	P1P2	0.145943	1.26172	10
BCL2L2	P1P2	0.553031	0.0425277	0.0109403	10	P1P2	0.574282	0.0215805	10	P1P2	0.819704	0.288364	9
BCL2L2-PABPN1	P1P2	0.907109	0.136075	0.00576148	10	P1P2	0.185279	0.0445566	10	P1P2	0.573925	0.702064	9
BCL3	P1P2	0.455156	-0.0808997	-0.0276547	9	P1P2	0.0207064	-0.0857673	10	P1P2	0.0840967	-0.475252	10
BCL6	P1P2	0.0207351	-0.156354	-0.26319	10	P1P2	0.00594878	-0.114014	10	P1P2	8.42442e-05	-0.957373	10
BCL6B	P1P2	0.260154	-0.0081583	-0.00477073	10	P1P2	0.707774	-0.0184279	10	P1P2	0.187164	-0.00373083	10
BCL7A	P1P2	0.440488	0.0604854	0.0215368	10	P1P2	0.339816	-0.0209215	10	P1P2	0.395453	0.109745	10
BCL7B	P1P2	0.67255	0.0482623	0.00831439	10	P1P2	0.907819	0.00476136	10	P1P2	0.72876	0.0842576	10
BCL7C	P1P2	0.98564	0.0771469	0.000484602	9	P1P2	0.436711	0.025677	10	P1P2	0.693302	0.460014	10
BCL9	P1P2	0.413682	0.0851869	0.032655	9	P1P2	0.543549	-0.0716426	10	P1P2	0.558294	0.395129	10
BCL9L	P1P2	0.34493	0.213197	0.098554	10	P1P2	0.271524	0.0385382	10	P1P2	0.257574	1.16363	10
BCLAF1	P1P2	0.90564	0.0493076	0.00212242	8	P1P2	5.03579e-05	-0.193437	10	P1P2	0.0610273	-0.456287	10
BCMO1	P1P2	0.391265	-0.0529524	-0.0215796	10	P1P2	0.129744	0.0576021	10	P1P2	0.747663	-0.0361548	10
BCO2	P1P2	0.00978299	0.299784	0.602424	10	P1P2	0.763128	0.00104915	10	P1P2	0.00479954	1.74035	10
BCOR	P1P2	0.766649	0.0375148	0.00432934	10	P1P2	0.819377	-0.00630915	10	P1P2	0.692975	0.545961	10
BCORL1	P1P2	0.209951	-0.0623743	-0.0422824	10	P1P2	0.799562	0.00223957	10	P1P2	0.232923	-0.224078	10
BCR	P1P2	0.542649	-0.0835261	-0.0221746	10	P1P2	0.0177168	0.0295984	10	P1P2	0.971902	0.04142	10
BCS1L	P1P2	0.0996588	0.209723	0.210034	10	P1P2	0.0462977	-0.102529	10	P1P2	0.336014	0.65939	10
BDH1	P2	0.323752	0.232145	0.113702	10	P2	0.0642107	0.0432991	9	P2	0.119954	1.31633	10
BDH2	P1P2	0.214247	0.162917	0.109005	10	P1P2	0.893511	-0.00614136	10	P1P2	0.225392	0.868632	10
BDKRB1	P1P2	0.268925	0.17769	0.101349	10	P1P2	0.899207	-0.01206	10	P1P2	0.213336	0.674482	10
BDKRB2	P1P2	0.568633	0.19326	0.0473811	10	P1P2	0.908169	-0.0319072	10	P1P2	0.740751	0.771735	10
BDNF	P1P2	0.8529	0.0720431	0.00497832	10	P1P2	0.412926	-0.0578467	10	P1P2	0.586871	-0.0212946	10
BDP1	P1P2	0.496096	0.0943311	0.0287176	9	P1P2	0.690908	-0.0870146	10	P1P2	0.75538	-0.0948917	10
BEAN1	P1P2	0.946968	-0.0226713	-0.000536512	9	P1P2	0.798976	0.0169163	9	P1P2	0.920915	0.153667	9
BECN1	P1P2	0.3215	-0.0804415	-0.0396431	10	P1P2	0.0632216	0.0319082	10	P1P2	0.696023	-0.105175	10
BEGAIN	P1	0.28734	-0.0821369	-0.0444856	10	P2	0.15195	-0.0426068	10	P1	0.192591	-0.497178	10
BEND2	P1P2	0.848943	0.191769	0.0136389	10	P1P2	0.739713	0.00718034	10	P1P2	0.601256	1.01	10
BEND3	P1P2	0.0744754	0.277563	0.313087	10	P1P2	0.353213	-0.0137848	10	P1P2	0.102826	1.18491	10
BEND4	P1P2	0.72051	0.163502	0.0232762	8	P1P2	0.845055	-0.0168348	10	P1P2	0.662668	1.02873	10
BEND5	P1P2	0.237729	0.126966	0.0792161	9	P1P2	0.935181	-0.0131473	9	P1P2	0.267353	0.777467	9
BEND6	P1P2	0.496096	0.160555	0.0488783	9	P1P2	0.813849	-0.00290567	9	P1P2	0.463729	0.788194	9
BEND7	P1P2	0.587813	0.0433664	0.0100073	10	P1P2	0.206287	-0.0413444	10	P1P2	0.263632	0.0727345	10
BEST1	P2	0.122786	0.176573	0.160832	10	P2	0.840227	-0.0274194	10	P2	0.273023	0.891726	9
BEST2	P1P2	0.916527	0.175116	0.00662894	10	P1P2	0.519547	-0.0660118	10	P1P2	0.617353	0.637152	10
BEST3	P1P2	0.453646	0.0811159	0.0278457	9	P1P2	0.181073	0.0130629	10	P1P2	0.263569	0.623137	10
BEST4	P1P2	0.514106	0.258156	0.0745936	10	P1P2	0.21469	0.0118524	10	P1P2	0.293287	1.31492	10
BET1	P1P2	0.439257	0.105044	0.0375301	10	P1P2	0.64304	0.00171579	10	P1P2	0.470116	0.894536	10
BET1L	P1P2	0.219441	0.217968	0.143572	10	P1P2	0.554621	-0.0186188	10	P1P2	0.2259	0.952358	10
BEX1	P1P2	0.0127893	-0.138049	-0.261349	10	P1P2	0.435153	0.00965675	10	P1P2	0.0183947	-0.516964	10
BEX2	P1P2	0.452276	0.186823	0.0643784	10	P1P2	0.648948	-0.0296028	10	P1P2	0.569143	0.568316	10
BEX4	P1P2	0.0475604	0.300612	0.397636	10	P1P2	0.424167	-0.035704	10	P1P2	0.0502428	1.2343	10
BEX5	P1P2	0.358829	0.00208269	0.00092703	10	P1P2	0.663175	0.00470701	10	P1P2	0.326552	0.111839	10
BFAR	P1P2	0.0919105	0.284838	0.295273	10	P1P2	0.178688	-0.0331516	10	P1P2	0.125311	0.974071	10
BFSP1	P2	0.607495	0.151887	0.0328771	9	P2	0.18213	-0.0495492	10	P1	0.724446	0.0898702	10
BFSP2	P1P2	0.343189	0.0402063	0.0186745	10	P1P2	0.914344	0.00449181	10	P1P2	0.518408	0.129982	10
BGLAP	P1P2	0.00439815	0.26905	0.634079	9	P1P2	1.01081e-05	-0.313659	10	P1P2	0.83573	-0.452139	10
BGN	P1P2	0.738474	0.186549	0.0245619	10	P1P2	0.52394	0.027488	10	P1P2	0.657011	0.939877	10
BHLHA15	P1P2	0.213372	0.173531	0.116416	10	P1P2	0.0502828	-0.0487182	10	P1P2	0.541088	0.778193	10
BHLHA9	P1P2	0.270923	0.194981	0.110584	10	P1P2	0.179687	-0.0466963	10	P1P2	0.516405	0.849211	10
BHLHB9	P1P2	0.17877	0.308078	0.230352	10	P1P2	0.45601	-0.0327813	10	P1P2	0.289378	1.49442	10
BHLHE22	P1P2	0.944492	0.0400044	0.000992178	10	P1P2	0.271908	0.0220669	10	P1P2	0.644487	0.657007	10
BHLHE23	P1P2	0.0812229	0.247857	0.270244	9	P1P2	0.25339	0.0187063	9	P1P2	0.0450423	1.30266	9
BHLHE40	P1P2	0.58037	0.0372119	0.00879299	10	P1P2	0.886543	0.00835709	10	P1P2	0.633322	0.227679	10
BHLHE41	P1P2	0.228602	0.171236	0.109748	10	P1P2	0.743266	-0.0123749	10	P1P2	0.264262	0.923299	10
BHMT	P1P2	0.740043	0.0340899	0.00445701	10	P1P2	0.355428	0.0227224	10	P1P2	0.982598	0.409462	10
BHMT2	P1P2	0.261917	0.150773	0.0877252	10	P1P2	0.37448	-0.0592796	10	P1P2	0.722457	0.474142	10
BICC1	P1P2	0.666711	-0.0365565	-0.00643622	10	P1P2	0.155725	0.0287728	10	P1P2	0.931881	0.0866744	10
BICD1	P1P2	0.335759	-0.0276163	-0.0130894	10	P1P2	0.761783	-0.0195571	10	P1P2	0.247312	-0.0836461	10
BICD2	P1P2	0.827367	0.0354436	0.00291707	10	P1P2	0.096473	-0.0495098	10	P1P2	0.339952	0.0902867	10
BID	P1P2	0.155796	-0.0976344	-0.0788343	9	P1P2	0.532589	-0.00851041	10	P1P2	0.290587	-0.339452	10
BIK	P1P2	0.674827	0.0877824	0.0149939	10	P1P2	0.328054	-0.000279089	10	P1P2	0.52665	0.787229	10
BIN1	P1P2	0.429046	0.21091	0.0775085	9	P1P2	0.619004	0.0372697	9	P1P2	0.275273	0.987534	9
BIN2	P1P2	0.756356	0.103379	0.0125372	10	P1P2	0.129113	0.00785429	10	P1P2	0.402539	0.723453	10
BIN3	P1P2	0.21201	-0.0472088	-0.0318019	10	P1P2	0.654136	-0.0158905	10	P1P2	0.260622	-0.309459	10
BIRC2	P1P2	0.275145	0.231075	0.129503	10	P1P2	0.494339	-0.0144984	10	P1P2	0.333577	0.779705	10
BIRC3	P1P2	0.317502	-0.0144069	-0.00717827	9	P1P2	0.211934	-0.0796348	10	P1P2	0.0523189	-0.0298549	10
BIRC5	P1P2	0.0326704	0.252964	0.375865	4	P1P2	1.26695e-07	-0.318178	10	P1P2	0.00515715	-0.446396	10
BIRC6	P1P2	0.648673	0.0791303	0.0148745	10	P1P2	0.00239078	0.0973071	10	P1P2	0.636579	1.03957	10
BIRC7	P1P2	0.138968	0.327558	0.280746	10	P1P2	0.979602	-0.0034783	10	P1P2	0.15652	1.57964	10
BIRC8	P1P2	0.62179	0.103567	0.0213718	10	P1P2	0.915976	-0.0252611	10	P1P2	0.541576	0.332572	10
BIVM	P2	0.0685477	0.217777	0.253494	10	P2	0.0709788	-0.0756351	10	P1	0.135728	1.15846	10
BIVM-ERCC5	ENST00000602836.1	0.963412	0.212783	0.00344453	10	ENST00000602836.1	0.433943	0.0160635	10	ENST00000602836.1	0.715734	0.9474	10
BLCAP	P1P2	0.0119093	-0.162341	-0.312363	10	P1P2	0.0210807	0.0401595	10	P1P2	0.0599973	-0.528186	10
BLID	ENST00000560104.1	0.705567	0.130886	0.0198242	10	ENST00000560104.1	0.950439	-0.0149969	10	ENST00000560104.1	0.804222	0.527843	10
BLK	P1P2	0.996328	0.0651558	0.000104095	10	P1P2	0.137353	-0.0471989	10	P1P2	0.669954	-0.0829336	10
BLM	P1P2	0.253184	0.168542	0.100546	9	P1P2	0.00350345	-0.0795803	10	P1P2	0.814044	0.312355	10
BLMH	P1P2	0.95655	0.153358	0.00295861	10	P1P2	0.974914	0.0113506	10	P1P2	0.653817	0.68985	10
BLNK	P1P2	0.888726	0.028788	0.00147487	9	P1P2	6.65513e-07	-0.181021	10	P1P2	0.0066136	-1.1159	10
BLOC1S1	P1P2	0.632528	0.0714623	0.0142153	10	P1P2	0.271716	-0.0354173	10	P1P2	0.860551	0.306437	10
BLOC1S2	P1P2	0.42957	0.220747	0.0810066	10	P1P2	0.136577	-0.0754714	10	P1P2	0.90101	0.805125	10
BLOC1S3	P2	0.0226979	-0.194425	-0.319637	10	P1	0.00386945	0.0634391	9	P2	0.149281	-0.509726	10
BLOC1S4	P1P2	0.31437	-0.0612187	-0.030766	8	P1P2	0.00895442	-0.111936	10	P1P2	0.217925	-0.463222	10
BLOC1S5	P1P2	0.241774	0.215328	0.13277	10	P1P2	0.974094	-0.0150018	10	P1P2	0.286237	1.06891	10
BLOC1S6	P1P2	0.864325	0.0978741	0.00619767	10	P1P2	0.0622258	0.0471211	10	P1P2	0.363264	0.607591	10
BLVRA	P2	0.200578	-0.0145324	-0.0101395	9	P1	0.321341	0.000920446	10	P2	0.119464	-0.254259	10
BLVRB	P1P2	0.182833	0.280936	0.207316	10	P1P2	0.802628	-0.00180559	10	P1P2	0.16004	1.20929	10
BLZF1	P1P2	0.315594	-0.0286164	-0.0143331	10	P1P2	0.786196	-0.0155524	10	P1P2	0.312581	-0.235759	10
BMF	P1P2	0.289836	0.201109	0.108166	10	P1P2	0.919125	-0.00394416	10	P1P2	0.294168	0.955845	10
BMI1	P1P2	0.29948	0.138595	0.0725727	10	P1P2	0.329656	0.0225133	10	P1P2	0.188844	1.06505	10
BMP1	P1P2	0.357587	0.130582	0.0583202	10	P1P2	0.834487	-0.0217528	10	P1P2	0.570945	0.729291	10
BMP10	P1P2	0.507557	0.0814465	0.0239873	9	P1P2	0.768506	-0.0239962	9	P1P2	0.515852	0.664436	9
BMP15	ENST00000252677.3	0.158597	-0.158711	-0.126922	9	ENST00000252677.3	0.569486	-0.0435971	10	ENST00000252677.3	0.113027	-0.600453	10
BMP2	P1	0.304277	-0.0455058	-0.0235143	10	P1	0.415193	-0.0164061	10	P1	0.248458	-0.464927	10
BMP2K	P1P2	0.66186	0.0211311	0.00378742	10	P1P2	0.530275	-0.0528525	10	P1P2	0.407861	-0.00936925	10
BMP3	P1P2	0.614781	0.0614767	0.0129888	10	P1P2	0.224289	-0.0610949	10	P1P2	0.375842	-0.326807	10
BMP4	P2	0.145183	-0.118903	-0.0996508	9	P1	0.531239	-0.0241546	10	P2	0.0720855	-0.502085	10
BMP5	P1P2	0.563108	-0.00118883	-0.000296505	10	P1P2	0.134728	0.0392753	10	P1P2	0.942431	0.243754	10
BMP6	P1P2	0.713745	0.0347949	0.00509596	10	P1P2	0.976789	0.00132077	10	P1P2	0.756052	0.25321	10
BMP7	P1P2	0.294256	0.271854	0.144429	10	P1P2	0.0848031	0.0308234	10	P1P2	0.0973511	1.65201	10
BMP8A	P1P2	0.39291	-0.042241	-0.0171375	7	P1P2	0.947631	-0.0576145	9	P1P2	0.220193	-0.4998	9
BMP8B	P1P2	0.798884	-0.0198563	-0.00193632	9	P1P2	0.661885	0.0235923	9	P1P2	0.944137	0.0940957	9
BMPER	P1P2	0.197621	0.255195	0.1797	9	P1P2	0.280058	0.0264425	9	P1P2	0.0609865	1.47305	9
BMPR1A	P1P2	0.675152	0.0342248	0.00583869	10	P1P2	0.0245822	0.0583854	10	P1P2	0.340325	0.589041	10
BMPR1B	P1P2	0.487108	0.180637	0.0564264	10	P1P2	0.184306	-0.0270982	10	P1P2	0.698531	0.51926	10
BMPR2	P1P2	0.422323	-0.0340794	-0.0127578	10	P1P2	0.0767917	0.053294	10	P1P2	0.975663	0.0630517	10
BMS1	P1P2	0.218302	0.119989	0.0793055	8	P1P2	0.000493755	-0.207836	10	P1P2	0.448919	-0.484009	10
BMX	P1P2	0.899114	0.0754158	0.00348308	10	P1P2	0.868701	-0.0184844	10	P1P2	0.92989	0.552196	10
BNC1	P1P2	0.0904318	0.203159	0.212033	10	P1P2	0.164331	0.0338399	10	P1P2	0.0333768	1.2495	10
BNC2	P1P2	0.550451	0.0888554	0.0230385	10	P1P2	0.693076	-0.0306778	10	P1P2	0.792272	0.769192	10
BNIP1	P1P2	0.469422	0.209869	0.0689284	10	P1P2	0.331481	-0.0836716	10	P1P2	0.924737	0.515454	10
BNIP2	P1P2	0.106303	-0.127817	-0.124424	10	P1P2	0.831162	0.000368401	10	P1P2	0.155402	-0.513836	10
BNIP3	P1P2	0.315737	0.109735	0.0549417	10	P1P2	0.194715	0.0341124	10	P1P2	0.205053	0.712807	10
BNIP3L	P1P2	0.732098	0.0271786	0.00368082	10	P1P2	0.952077	-0.0166599	10	P1P2	0.782634	0.15808	10
BNIPL	P1P2	0.368315	0.162084	0.0703089	10	P1P2	0.33324	0.0356818	10	P1P2	0.113429	1.0432	10
BOC	P1P2	0.209755	0.00408677	0.00277201	9	P1P2	0.388305	0.027455	9	P1P2	0.409455	-0.116988	9
BOD1	P1P2	0.210384	0.205422	0.139069	10	P1P2	0.414521	0.0424492	10	P1P2	0.138415	1.14001	10
BOD1L1	P2	0.46542	0.174671	0.0580179	10	P2	0.721262	0.00386397	10	P2	0.600128	0.886156	10
BOD1L2	P1P2	0.227857	-0.108761	-0.0698613	10	P1P2	0.203976	-0.0346122	10	P1P2	0.135381	-0.562348	10
BOK	P1P2	0.779846	0.11497	0.0124158	9	P1P2	0.347528	-0.08202	10	P1P2	0.897627	0.341762	10
BOLA1	P1	0.426888	-0.0500247	-0.0184934	10	P1	0.648631	-0.0101725	10	P1	0.387552	-0.185702	10
BOLA2	ENST00000330978.3	0.178434	0.213852	0.160073	10	ENST00000330978.3	0.96847	-0.0105557	10	ENST00000330978.3	0.191286	1.06946	10
BOLA2B	ENST00000305321.4	0.0250793	0.323392	0.517648	10	ENST00000305321.4	0.904443	-0.0105557	10	ENST00000305321.4	0.0260657	1.58605	10
BOLA3	P1P2	0.786902	0.0750567	0.00781186	10	P1P2	0.735168	-0.0396366	10	P1P2	0.883882	0.302709	10
BOLL	P1P2	0.0295406	0.296387	0.453348	10	P1P2	0.671942	-0.0271028	10	P1P2	0.0254394	1.28035	10
BOP1	P1	0.00992933	0.391005	0.783214	9	P1	0.000166305	-0.287187	10	P1	0.821258	0.680926	10
BORA	P1P2	0.94591	0.0885912	0.00213949	10	P1P2	3.19201e-05	-0.191151	10	P1P2	0.00885262	-0.592936	10
BPGM	P1P2	0.0800189	0.160872	0.176445	10	P1P2	0.381715	-0.0457053	10	P1P2	0.158773	0.748765	10
BPHL	P1P2	0.889839	0.0997745	0.00505743	10	P1P2	0.657108	-0.0275334	10	P1P2	0.876906	0.31729	10
BPI	P1P2	0.975485	-0.00184746	-1.99147e-05	10	P1P2	0.271075	0.00326527	10	P1P2	0.90171	0.0368841	10
BPIFA1	P2	0.166527	-0.0950231	-0.0739768	10	P2	0.508179	-0.0535605	10	P2	0.0986974	-0.575425	10
BPIFA2	P1P2	0.532462	-0.00498215	-0.00136367	10	P1P2	0.166167	-0.0654581	10	P1P2	0.254244	-0.471881	10
BPIFA3	P1P2	0.46924	-0.0436263	-0.0143358	10	P1P2	0.947747	-0.00794731	10	P1P2	0.423223	-0.122923	10
BPIFB1	P1P2	0.247311	0.182076	0.110476	10	P1P2	0.190153	-0.042973	10	P1P2	0.388038	0.690729	10
BPIFB2	P1P2	0.957438	0.234285	0.00442547	9	P1P2	0.977013	0.00130912	9	P1P2	0.712359	0.932982	9
BPIFB3	ENST00000375494.3	0.422495	-0.00392791	-0.00146974	10	ENST00000375494.3	0.873908	-0.0126149	10	ENST00000375494.3	0.297572	0.0817983	10
BPIFB4	P1P2	0.872387	0.180347	0.0106929	10	P1P2	0.407996	-0.022914	10	P1P2	0.916079	0.270231	10
BPIFB6	P1P2	0.767329	0.0400852	0.00461052	10	P1P2	0.451671	-0.0350774	10	P1P2	0.562263	0.457414	10
BPIFC	P1P2	0.378356	0.0847841	0.0357873	10	P1P2	0.237499	0.0278173	10	P1P2	0.6662	0.390891	10
BPNT1	P1P2	0.578135	-0.0164095	-0.00390498	10	P1P2	0.346097	-0.0236529	10	P1P2	0.36078	-0.109172	10
BPTF	P1P2	0.0376076	0.278479	0.396756	10	P1P2	0.0269529	-0.07092	10	P1P2	0.250033	0.819197	10
BPY2	ENST00000331070.3,ENST00000382585.1	0.0261885	0.252893	0.400049	10	ENST00000331070.3,ENST00000382585.1	0.700575	0.000549812	10	ENST00000331070.3,ENST00000382585.1	0.0151322	1.18075	10
BPY2B	ENST00000382392.1	0.0261885	0.252893	0.400049	10	ENST00000382392.1	0.700575	0.000549812	10	ENST00000382392.1	0.0151322	1.18075	10
BPY2C	ENST00000382287.1	0.0261885	0.252893	0.400049	10	ENST00000382287.1	0.700575	0.000549812	10	ENST00000382287.1	0.0151322	1.18075	10
BRAF	P1P2	0.783812	0.0591368	0.00625598	9	P1P2	0.173256	0.0355796	9	P1P2	0.880329	0.489926	9
BRAP	P1P2	0.802015	0.0523911	0.00501998	10	P1P2	0.751168	0.00797981	10	P1P2	0.645968	0.403812	10
BRAT1	P1P2	0.0356732	-0.115779	-0.167608	10	P1P2	0.183578	0.0259117	10	P1P2	0.0999066	-0.451685	10
BRCA1	P1P2	0.444191	-0.0046576	-0.00164148	10	P1P2	0.0139529	-0.107227	10	P1P2	0.0436813	-0.464934	10
BRCA2	P1P2	0.000956679	-0.277544	-0.83797	10	P1P2	0.0313317	-0.105584	10	P1P2	4.11471e-06	-1.46604	10
BRCC3	P1P2	0.265214	-0.0284726	-0.0164117	10	P1P2	0.458501	-0.0220039	10	P1P2	0.217375	-0.113403	10
BRD1	P1P2	0.137743	-0.136774	-0.117753	10	P1P2	0.0173262	0.0458726	10	P1P2	0.421859	-0.420245	10
BRD2	P1	0.771506	0.00241551	0.000272132	7	P1	0.00139717	-0.243994	10	P1	0.0135104	-0.853595	10
BRD3	P1P2	0.382791	0.104063	0.043398	10	P1P2	0.402771	-0.041728	10	P1P2	0.462361	0.740176	10
BRD4	ENST00000263377.2,ENST00000371835.4	0.434529	0.172455	0.0624256	10	ENST00000263377.2,ENST00000371835.4	0.842985	-0.0145378	10	ENST00000263377.2,ENST00000371835.4	0.434228	0.769636	10
BRD7	P1P2	0.922538	0.018725	0.000655675	10	P1P2	0.887239	-0.0418187	10	P1P2	0.892731	0.261058	10
BRD8	P1P2	0.07385	0.282684	0.319899	10	P1P2	0.179735	-0.0779246	10	P1P2	0.280812	0.880005	10
BRD9	P1P2	0.858492	0.0580003	0.00384331	10	P1P2	0.983001	-0.0463587	10	P1P2	0.997413	0.230284	10
BRDT	P1P2	0.459182	-0.0785708	-0.0265581	10	P1P2	0.681077	0.00824936	10	P1P2	0.637736	-0.224676	10
BRE	P1P2	0.0658197	-0.134245	-0.15863	10	P1P2	0.305612	0.00530308	10	P1P2	0.105717	-0.573579	10
BRF1	P1P2	0.167759	0.221153	0.171463	10	P1P2	0.00251117	-0.226193	10	P1P2	0.478766	-0.190911	10
BRF2	P1P2	0.266362	0.210524	0.120952	10	P1P2	0.782244	-0.0264752	10	P1P2	0.319123	0.647036	10
BRI3	P1P2	0.391949	-0.0906027	-0.0368545	9	P1P2	0.466826	-0.0095392	10	P1P2	0.276886	-0.378949	10
BRI3BP	P1P2	0.899232	0.106863	0.0049294	10	P1P2	0.351312	-0.0243258	10	P1P2	0.919822	0.465687	10
BRICD5	P1P2	0.646316	0.00295854	0.000560805	8	P1P2	0.883851	0.0096451	8	P1P2	0.833172	0.304825	8
BRINP1	P1P2	0.0042526	-0.219162	-0.519708	10	P1P2	0.528736	-0.00245788	10	P1P2	0.00309657	-1.10337	10
BRINP2	P1P2	0.359919	0.237895	0.105577	10	P1P2	0.568688	0.0185736	10	P1P2	0.313571	1.24181	10
BRINP3	P2	0.227562	0.207189	0.133201	9	P2	0.584437	-0.0282189	10	P2	0.232289	1.00591	10
BRIP1	P1P2	6.17742e-05	-0.336718	-1.41731	9	P1P2	0.736165	0.000319986	10	P1P2	7.64925e-05	-1.46735	10
BRIX1	P1P2	0.970037	0.0730871	0.000965593	9	P1P2	0.310003	-0.0625994	10	P1P2	0.563557	0.19302	10
BRK1	P1P2	0.875428	0.0847723	0.00489812	10	P1P2	0.321556	0.0234383	10	P1P2	0.654988	0.482822	10
BRMS1	P1P2	0.407205	0.0234697	0.00915755	10	P1P2	0.93547	-0.0213813	10	P1P2	0.329613	0.112125	10
BRMS1L	P1P2	0.529931	0.106686	0.0294219	10	P1P2	0.822577	0.00262811	10	P1P2	0.52348	0.467985	10
BROX	P1P2	0.344248	0.262819	0.121719	10	P1P2	0.740267	-0.0080061	10	P1P2	0.454322	0.926704	10
BRPF1	P1P2	0.577425	0.188681	0.0450014	10	P1P2	0.689068	-0.0102491	10	P1P2	0.702572	0.836779	10
BRPF3	P1P2	0.610717	0.129695	0.0277755	10	P1P2	0.9091	0.00846386	10	P1P2	0.559781	0.566019	10
BRS3	P1P2	0.566878	0.0342453	0.00844183	9	P1P2	0.307906	-0.0463314	10	P1P2	0.554338	0.172437	10
BRSK1	P1P2	0.197336	0.362269	0.255325	10	P1P2	0.452024	-0.0373472	10	P1P2	0.272934	1.11843	10
BRSK2	P1P2	0.123146	0.265432	0.241432	10	P1P2	0.576186	-0.00884093	10	P1P2	0.133654	1.0633	10
BRWD1	P1P2	0.254912	-0.0436979	-0.0259395	10	P1P2	0.432563	-0.0243851	10	P1P2	0.0801281	-0.0750891	10
BRWD3	P1P2	0.10166	-0.139196	-0.138201	10	P1P2	0.0153035	0.0830424	10	P1P2	0.250458	0.038252	10
BSCL2	P1	0.249623	0.291345	0.175598	10	P2	0.211397	-0.0370964	10	P2	0.654349	0.699526	10
BSDC1	P1P2	0.835473	0.0693857	0.00541679	10	P1P2	0.0779749	-0.048348	10	P1P2	0.83021	0.259731	10
BSG	P1P2	0.176241	-0.0979809	-0.0738672	10	P1P2	0.414773	0.0180575	10	P1P2	0.300865	-0.0876107	10
BSN	P1P2	0.772436	0.0873428	0.00979439	10	P1P2	0.101125	-0.0448168	10	P1P2	0.404862	0.118555	10
BSND	P1P2	0.00553173	-0.130747	-0.295114	10	P1P2	0.0422082	0.0398016	10	P1P2	0.0220083	-0.416135	10
BSPH1	P1P2	0.45308	0.0685495	0.023569	9	P1P2	0.9257	-0.0737761	9	P1P2	0.116378	0.00974006	9
BSPRY	P1P2	0.659386	0.129348	0.023394	10	P1P2	0.427754	0.0088477	10	P1P2	0.598591	0.942161	10
BST1	P1P2	0.334302	0.0962687	0.0458106	9	P1P2	0.0206419	-0.0920507	10	P1P2	0.985772	0.0130606	10
BST2	P1P2	0.317243	-0.0719571	-0.0358783	10	P1P2	0.124292	-0.0496986	10	P1P2	0.115187	-0.397439	10
BSX	P1P2	0.685053	0.0576048	0.00946309	10	P1P2	0.990035	-0.00568211	10	P1P2	0.686244	0.53834	10
BTAF1	P1P2	0.482098	0.0314766	0.00997381	10	P1P2	0.533071	0.00894993	10	P1P2	0.845756	0.240386	10
BTBD1	P1P2	0.170799	-0.0033602	-0.00257901	10	P1P2	0.320267	-0.00395637	10	P1P2	0.24593	-0.273243	10
BTBD10	P2	0.0546379	-0.124495	-0.157175	10	P2	0.144814	-0.0391604	10	P2	0.0130554	-0.553695	10
BTBD11	P2	0.50051	0.162691	0.0489026	10	P1	0.158006	-0.0420132	10	P2	0.545487	0.693686	10
BTBD16	ENST00000260723.4,ENST00000368994.2	0.89559	0.105613	0.00505789	10	ENST00000260723.4,ENST00000368994.2	0.167882	0.046266	10	ENST00000260723.4,ENST00000368994.2	0.722678	1.02119	10
BTBD17	P1P2	0.150918	-0.122678	-0.10075	10	P1P2	0.925659	-0.00216552	10	P1P2	0.125238	-0.497866	10
BTBD18	ENST00000436147.3	0.815177	-0.00946709	-0.000840187	6	ENST00000422652.1	0.15883	0.0377257	10	ENST00000422652.1	0.558888	0.770128	10
BTBD19	P1P2	0.421233	-0.0261669	-0.00982511	9	P1P2	0.444487	-0.02276	9	P1P2	0.299695	-0.407943	9
BTBD2	P1P2	0.124087	-0.0796486	-0.0721833	10	P1P2	0.10254	0.0232653	10	P1P2	0.264325	-0.308477	10
BTBD3	P1P2	0.209414	0.172502	0.117128	9	P1P2	0.81892	-0.0291751	10	P1P2	0.360393	0.777982	10
BTBD6	P1P2	0.989221	0.0830809	0.00039102	10	P1P2	0.152076	0.0470964	10	P1P2	0.756052	0.81857	10
BTBD7	P1P2	0.402156	0.136711	0.0540834	9	P1P2	0.432477	-0.0560782	10	P1P2	0.686027	0.466675	10
BTBD8	P1P2	0.821357	0.0729171	0.00623207	10	P1P2	0.880975	0.0358995	10	P1P2	0.970844	0.562686	10
BTBD9	P1P2	0.756581	0.0297233	0.00360081	10	P1P2	0.890026	0.00518752	10	P1P2	0.671243	0.316096	10
BTC	P1P2	0.88761	-0.00704926	-0.000364995	10	P1P2	0.423145	0.00197043	10	P1P2	0.854766	0.0442346	10
BTD	P1P2	0.647498	-0.0100771	-0.00190217	10	P1P2	0.0750686	0.0353071	10	P1P2	0.976133	0.397886	10
BTF3	P1P2	0.862576	0.0237888	0.0015273	9	P1P2	0.135265	-0.0868021	10	P1P2	0.236989	-0.00917785	10
BTF3L4	P1P2	0.69984	0.0997461	0.0154608	10	P1P2	0.374797	-0.0276378	10	P1P2	0.901477	0.45978	10
BTG1	P1P2	0.229695	-0.0858299	-0.0548324	10	P1P2	0.705699	-0.00821444	10	P1P2	0.200922	-0.362851	10
BTG2	P1P2	0.101881	-0.0535585	-0.053125	9	P1P2	0.837009	-0.0189054	9	P1P2	0.0706022	-0.36874	9
BTG3	P1P2	0.847664	0.135655	0.00973682	10	P1P2	0.774018	0.00166678	10	P1P2	0.893081	0.737114	10
BTG4	P1P2	0.114993	-0.120629	-0.11331	10	P1P2	0.0673371	0.0455571	10	P1P2	0.300521	-0.31445	10
BTK	P1P2	0.0480618	0.319233	0.420813	10	P1P2	7.03871e-07	-0.215401	10	P1P2	0.193347	-0.104821	10
BTLA	P1P2	0.519386	0.00938011	0.00266874	10	P1P2	0.550297	-0.0433491	10	P1P2	0.26502	-0.493757	10
BTN1A1	ENST00000244513.6	0.202234	0.188393	0.130772	9	ENST00000244513.6	0.954886	-0.0935284	10	ENST00000244513.6	0.509249	0.563972	9
BTN2A1	P1P2	0.324772	0.103767	0.050682	10	P1P2	0.317129	0.0287997	10	P1P2	0.21947	0.871765	10
BTN2A2	P1P2	0.737683	0.112515	0.0148666	9	P1P2	0.0412788	-0.0787343	10	P1P2	0.636789	0.327149	10
BTN3A1	P1P2	0.762006	0.104334	0.0123157	10	P1P2	0.0376649	-0.0323624	10	P1P2	0.870868	0.281978	10
BTN3A2	P1P2	0.25516	0.198703	0.117868	10	P1P2	0.039486	-0.0671184	10	P1P2	0.51984	0.581599	10
BTN3A3	P1P2	0.445341	-0.0373847	-0.0131335	10	P1P2	0.115922	-0.0496054	10	P1P2	0.172857	-0.273675	10
BTNL2	P1P2	0.292823	0.336488	0.179481	10	P1P2	0.965893	-0.00395637	10	P1P2	0.216717	1.55378	10
BTNL3	P1P2	0.832228	0.101182	0.00807006	10	P1P2	0.51451	0.0220124	10	P1P2	0.997648	0.495498	10
BTNL8	P1P2	0.761214	0.127639	0.0151244	10	P1P2	0.975149	-0.0253083	10	P1P2	0.74465	0.405424	10
BTNL9	P2	0.142368	-0.102364	-0.08666	10	P1	0.0224903	-0.043676	9	P2	0.0596572	-0.565354	10
BTRC	P1P2	0.34334	0.00663646	0.00308114	10	P1P2	0.525568	-0.010257	10	P1P2	0.189043	0.425652	10
BUB1	P1P2	0.336654	0.297004	0.140428	10	P1P2	0.0322203	-0.0711369	10	P1P2	0.535445	1.04078	10
BUB1B	P1P2	0.301907	0.0105863	0.00550625	10	P1P2	0.184889	-0.0390618	10	P1P2	0.0686325	-0.230946	10
BUB3	P1P2	0.727411	0.0768062	0.0106162	10	P1P2	0.0161796	-0.166901	10	P1P2	0.0527858	-0.944092	10
BUD13	P1P2	0.671256	0.130324	0.0225607	7	P1P2	0.024498	-0.214185	10	P1P2	0.263632	0.316412	10
BUD31	P1P2	0.204286	0.22058	0.152148	10	P1P2	0.347226	-0.0631447	10	P1P2	0.241993	0.508972	10
BVES	P1P2	0.776301	0.00343019	0.000377217	10	P1P2	0.492948	0.0302738	10	P1P2	0.8355	0.225993	10
BYSL	P1P2	0.531488	0.104972	0.0288154	10	P1P2	0.017745	-0.0873565	10	P1P2	0.702681	-0.167843	10
BZRAP1	P1P2	0.374192	0.21216	0.0905724	10	P1P2	0.607149	-0.0203041	10	P1P2	0.506358	0.968324	10
BZW1	P1P2	0.0290121	-0.125932	-0.193611	10	P1P2	0.043935	0.0574912	10	P1P2	0.107058	-0.334675	10
BZW2	P1P2	0.7273	0.0496363	0.00686403	10	P1P2	0.736054	-0.0324784	10	P1P2	0.526073	-0.0567	10
C10orf10	P1P2	0.716848	-0.0141916	-0.00205172	10	P1P2	0.848277	0.000468129	10	P1P2	0.641108	-0.191031	10
C10orf105	P1P2	0.682763	-0.0255254	-0.00423032	10	P1P2	0.00748133	-0.0956763	10	P1P2	0.127652	-0.304094	10
C10orf107	P1P2	0.657716	0.271066	0.0493236	9	P1P2	0.477925	-0.0293407	9	P1P2	0.85673	1.23465	9
C10orf11	ENST00000372499.1	0.33561	0.0161073	0.00763753	10	ENST00000372499.1	0.832537	0.0100191	10	ENST00000372499.1	0.36701	0.15798	10
C10orf111	P1P2	0.0266623	0.25938	0.40829	10	P1P2	0.619117	-0.0321698	10	P1P2	0.0245057	1.52958	10
C10orf112	ENST00000454679.2	0.829912	0.0305511	0.00247365	10	ENST00000454679.2	0.493412	0.018773	10	ENST00000454679.2	0.918652	0.147266	10
C10orf113	ENST00000529198.1,ENST00000534331.1	0.025516	0.382188	0.608897	10	ENST00000529198.1,ENST00000534331.1	0.478786	-0.0134119	10	ENST00000529198.1,ENST00000534331.1	0.0426011	1.83007	10
C10orf118	P2	0.610562	0.0858202	0.0183887	9	P2	0.214611	0.0255641	9	P2	0.313588	0.47652	9
C10orf12	ENST00000286067.2	0.410026	0.169185	0.0655064	9	ENST00000286067.2	0.820949	-0.0111578	9	ENST00000286067.2	0.383162	0.556002	9
C10orf120	P1P2	0.0798668	0.285612	0.313498	9	P1P2	0.914386	-0.00700986	9	P1P2	0.0975804	1.37698	9
C10orf126	ENST00000375520.1	0.836454	0.0719344	0.00557909	9	ENST00000375520.1	0.874834	-0.0215833	10	ENST00000375520.1	0.688304	0.824668	10
C10orf128	P1P2	0.221959	-0.0763187	-0.0498916	10	P1P2	0.748383	0.0223534	10	P1P2	0.247767	-0.632263	9
C10orf129	P1P2	0.639035	0.0160093	0.00311343	9	P1P2	0.939617	-0.000735734	9	P1P2	0.708887	0.106767	9
C10orf131	P1P2	0.159941	-0.0617769	-0.049177	10	P1P2	0.626597	0.00804331	10	P1P2	0.154035	-0.606603	10
C10orf137	P1P2	0.830954	0.0284556	0.00228848	10	P1P2	0.040496	-0.0863185	10	P1P2	0.235299	-0.448867	10
C10orf2	P1P2	0.100118	-0.129207	-0.129141	10	P1P2	0.675268	-0.0468975	10	P1P2	0.0180615	-0.445798	10
C10orf25	P1P2	0.168538	-0.0746523	-0.0577288	10	P1P2	0.196644	0.00303412	10	P1P2	0.190436	-0.00951311	10
C10orf32	P1P2	0.298275	-0.138074	-0.0725418	9	P1P2	0.238552	-0.063119	10	P1P2	0.189639	-0.680993	10
C10orf35	P1P2	0.184693	0.214294	0.157195	10	P1P2	0.195036	0.0161199	9	P1P2	0.128539	1.37592	10
C10orf53	P1P2	0.226315	0.219348	0.141542	10	P1P2	0.746157	-0.0222617	10	P1P2	0.258815	0.876281	10
C10orf54	P1P2	0.0477104	0.295201	0.390074	10	P1P2	0.704935	-0.00186498	10	P1P2	0.0301437	1.30318	10
C10orf55	P1P2	0.0370652	0.365704	0.523335	10	P1P2	0.647575	-0.0222616	10	P1P2	0.0434206	1.60563	10
C10orf62	P1P2	0.676957	-0.0485719	-0.00822997	9	P1P2	0.916353	-0.00684847	9	P1P2	0.457089	-0.280986	8
C10orf67	P1P2	0.70209	-0.00618271	-0.00094971	9	P1P2	0.417747	0.0355686	9	P1P2	0.890634	0.124904	9
C10orf71	P1P2	0.853249	0.0235637	0.0016241	10	P1P2	0.420259	0.026407	10	P1P2	0.836996	0.427249	10
C10orf76	P1P2	0.927255	0.192043	0.0062992	10	P1P2	0.596508	0.00822092	10	P1P2	0.940203	0.893175	10
C10orf82	P1P2	0.192311	-0.0831279	-0.0595192	8	P1P2	0.892547	-0.0141703	9	P1P2	0.175525	-0.344141	9
C10orf88	P1P2	0.160221	0.25553	0.203218	9	P1P2	0.154487	-0.0545508	10	P1P2	0.180695	1.01177	10
C10orf90	ENST00000284694.7	0.00686121	0.311406	0.673759	10	ENST00000284694.7	0.641356	0.00742859	10	ENST00000284694.7	0.00527119	1.71169	10
C10orf91	P1P2	0.796167	-0.0491485	-0.00486549	10	P1P2	0.028748	-0.0647131	10	P1P2	0.267619	-0.543859	10
C10orf95	P1P2	0.0251899	0.290349	0.464202	8	P1P2	0.20555	-0.0683593	10	P1P2	0.183107	1.03389	10
C10orf99	P1P2	0.771982	-0.0311019	-0.00349563	10	P1P2	0.965776	-0.0221083	10	P1P2	0.719038	0.142247	10
C11orf1	P1P2	0.8889	0.0209227	0.00107013	10	P1P2	0.877846	0.0166659	10	P1P2	0.833314	0.215518	10
C11orf16	P1P2	0.149403	0.313165	0.258562	10	P1P2	0.115718	0.051056	10	P1P2	0.0305974	1.91122	9
C11orf21	P1P2	0.47822	0.0453197	0.0145192	10	P1P2	0.306375	0.0182214	10	P1P2	0.687762	-0.0623465	10
C11orf24	P1P2	0.427838	-0.0246384	-0.00908467	10	P1P2	0.0341991	0.0342223	10	P1P2	0.915378	0.153429	10
C11orf30	P1P2	0.583742	0.0880683	0.0205886	9	P1P2	0.257929	-0.0508446	10	P1P2	0.804906	0.118026	10
C11orf31	P1P2	0.871812	0.0205226	0.00122268	9	P1P2	0.318767	-0.0579214	10	P1P2	0.843103	0.0614903	10
C11orf34	P1P2	0.788265	0.0776052	0.00801877	9	P1P2	0.107131	0.0408425	9	P1P2	0.795875	0.770096	9
C11orf35	P1P2	0.944374	0.0508623	0.00126424	10	P1P2	0.350856	-0.0145529	10	P1P2	0.708813	0.167136	10
C11orf40	ENST00000307616.1	0.0491148	0.266175	0.348367	9	ENST00000307616.1	0.0453615	0.0267009	9	ENST00000307616.1	0.0146151	1.47805	9
C11orf42	P1P2	0.669304	0.0331097	0.00577356	10	P1P2	0.683125	0.0276104	10	P1P2	0.572247	0.238157	10
C11orf44	ENST00000317019.2	0.951329	0.0467357	0.00101272	9	ENST00000317019.2	0.218131	-0.0405983	10	ENST00000317019.2	0.680617	0.156031	10
C11orf45	P2	0.0205577	0.398792	0.672772	8	P2	0.595396	-0.0589267	9	P2	0.11306	2.00296	10
C11orf48	P2	0.0865456	0.337726	0.35892	10	P1	0.196797	-0.0875022	10	P2	0.228508	1.61301	10
C11orf49	P1P2	0.573335	0.0718814	0.017366	8	P1P2	0.373904	-0.0243018	9	P1P2	0.552625	0.336765	8
C11orf52	P2	0.187629	-0.0249888	-0.0181593	9	P1	0.433943	0.0235857	10	P2	0.0827125	-0.0351091	9
C11orf53	P1P2	0.581081	-0.0633376	-0.0149327	10	P1P2	0.568887	-0.00398143	10	P1P2	0.559186	-0.203617	10
C11orf54	P1P2	0.875662	0.141111	0.00813696	10	P1P2	0.349114	0.0185793	10	P1P2	0.671243	0.68034	10
C11orf57	P1P2	0.517424	0.0989039	0.0283017	8	P1P2	0.807746	-0.0833126	10	P1P2	0.56286	0.750102	10
C11orf58	P1P2	0.957937	0.0267118	0.000498524	9	P1P2	0.23861	-0.103192	10	P1P2	0.551183	-0.0293091	10
C11orf63	P1P2	0.540889	0.0346481	0.0092473	9	P1P2	0.154913	-0.0676919	10	P1P2	0.376081	0.301998	10
C11orf65	P1P2	0.804571	0.0704375	0.00665182	9	P1P2	0.774549	0.0100097	9	P1P2	0.962328	0.217486	9
C11orf68	P1P2	0.832576	0.0877337	0.00698152	10	P1P2	0.98727	-0.0187356	9	P1P2	0.667915	0.0342467	10
C11orf70	P1P2	0.816396	0.0345272	0.00304182	10	P1P2	0.0302281	-0.0559041	10	P1P2	0.16211	-0.0287668	10
C11orf71	P1P2	0.104198	0.255611	0.251046	10	P1P2	0.713575	-0.0019676	10	P1P2	0.126258	1.1141	10
C11orf73	P1P2	0.567727	0.138792	0.0341234	10	P1P2	0.00706272	-0.104923	10	P1P2	0.578076	-0.101278	10
C11orf74	P1P2	0.809485	0.0509636	0.00467801	10	P1P2	0.00596213	0.0552789	10	P1P2	0.400306	0.837165	10
C11orf80	P1P2	0.479216	0.108658	0.0347128	9	P1P2	0.554428	-0.0323459	9	P1P2	0.801515	0.48302	9
C11orf82	P1P2	0.867011	-0.0101385	-0.000628339	10	P1P2	0.143925	-0.042106	10	P1P2	0.453434	-0.427929	10
C11orf83	P1P2	0.0585432	0.294369	0.362817	10	P1P2	0.870089	-0.0144423	10	P1P2	0.0769998	2.0084	10
C11orf84	P1P2	0.835354	0.0314553	0.00245759	9	P1P2	0.00210414	0.082312	9	P1P2	0.252903	0.623903	8
C11orf85	P1P2	0.953949	0.126549	0.00259108	10	P1P2	0.00736737	0.0290289	10	P1P2	0.434314	0.693287	10
C11orf86	P1P2	0.779603	0.200215	0.0216486	10	P1P2	0.219562	0.0183735	10	P1P2	0.509475	1.06253	10
C11orf87	P1P2	0.285098	-0.05204	-0.0283621	9	P1P2	0.264699	0.0231407	9	P1P2	0.397822	-0.216489	9
C11orf88	P1P2	0.332503	-0.0220924	-0.0105647	9	P1P2	0.431874	-0.0409838	10	P1P2	0.322283	-0.102215	10
C11orf91	P1P2	0.529056	0.0126191	0.00348916	10	P1P2	0.980423	-0.0137171	10	P1P2	0.417698	0.0899621	10
C11orf94	P1P2	0.893798	0.113958	0.00555665	9	P1P2	0.193202	-0.0785804	10	P1P2	0.959684	0.47927	10
C11orf95	P1P2	0.673201	0.16138	0.027734	10	P1P2	0.720382	0.00701963	10	P1P2	0.763346	0.858368	10
C11orf96	P1P2	0.192985	0.228374	0.163167	10	P1P2	0.635582	-0.00794423	10	P1P2	0.147914	1.04316	10
C12orf10	P1P2	0.671812	0.077811	0.013442	9	P1P2	0.47342	-0.0446475	10	P1P2	0.90206	0.45987	10
C12orf23	P1P2	0.0510759	0.308835	0.398949	10	P1P2	0.004874	-0.0925036	10	P1P2	0.20191	0.792253	10
C12orf29	P1P2	0.682691	0.087749	0.0145467	9	P1P2	0.60756	-0.00311665	10	P1P2	0.648721	0.765989	10
C12orf39	P1	0.508854	0.000682188	0.000200159	10	P1	0.811505	0.0140273	10	P2	0.678889	0.541771	10
C12orf4	P1P2	0.995854	0.114134	0.000205922	10	P1P2	0.426385	-0.0255885	10	P1P2	0.683753	0.294041	10
C12orf40	P1P2	0.919119	0.1634	0.00598504	10	P1P2	0.936639	-0.0155289	10	P1P2	0.988712	1.15905	10
C12orf42	ENST00000378113.2,ENST00000548883.1	0.765354	0.00402055	0.000466937	9	ENST00000378113.2,ENST00000548883.1	0.0291148	-0.0881164	10	ENST00000378113.2,ENST00000548883.1	0.206003	-0.524978	10
C12orf43	P1P2	0.0335017	0.369781	0.545403	10	P1P2	0.258981	0.0160179	10	P1P2	0.0201823	1.77473	10
C12orf44	P1P2	0.0692497	-0.100593	-0.116646	10	P1P2	0.305057	0.03243	10	P1P2	0.16242	-0.00216344	10
C12orf45	P1P2	0.189893	0.267868	0.193264	9	P1P2	0.00146034	-0.177961	10	P1P2	0.789094	0.59675	10
C12orf49	P1P2	0.860485	0.0506002	0.00330199	9	P1P2	0.89293	-0.0228335	10	P1P2	0.712938	0.331231	9
C12orf5	P1P2	0.428617	0.234821	0.0863978	10	P1P2	0.206974	-0.0421372	10	P1P2	0.629758	0.674947	10
C12orf50	P1P2	0.656593	0.168612	0.030806	10	P1P2	0.307488	0.0177594	10	P1P2	0.545977	0.990559	10
C12orf52	P1P2	0.425248	0.269564	0.100105	10	P1P2	0.448849	-0.00387284	10	P1P2	0.404779	1.18268	10
C12orf54	P1P2	0.678561	0.113216	0.0190669	9	P1P2	0.476677	0.0141419	9	P1P2	0.707962	0.711081	9
C12orf55	P1P2	0.97146	0.0226242	0.000284504	10	P1P2	0.79072	0.0271263	10	P1P2	0.751239	0.275286	10
C12orf56	P1P2	0.970661	0.141936	0.00183556	9	P1P2	0.297374	0.0296532	9	P1P2	0.637141	0.639716	9
C12orf57	P1P2	0.426542	0.167177	0.0618619	10	P1P2	0.000117127	-0.187331	10	P1P2	0.216991	-0.583245	10
C12orf60	P1P2	0.729902	0.166257	0.0227332	7	P1P2	0.000844755	-0.214958	9	P1P2	0.355821	0.304799	9
C12orf61	P1P2	0.00863116	-0.208908	-0.431172	9	P1P2	0.204322	0.0259296	9	P1P2	0.0251444	-0.534936	9
C12orf65	P1P2	0.506476	0.118313	0.0349545	10	P1P2	0.137003	-0.0869213	10	P1P2	0.970492	0.00317702	10
C12orf66	P1P2	0.183321	-0.104108	-0.0767055	10	P1P2	0.980891	0.0121141	10	P1P2	0.186721	-0.204369	10
C12orf68	P1P2	0.702481	0.0480683	0.00737201	10	P1P2	0.446126	0.000552162	10	P1P2	0.862057	0.299863	10
C12orf71	ENST00000429849.2	0.810753	0.0867458	0.00790352	9	ENST00000429849.2	0.217486	0.0256761	9	ENST00000429849.2	0.445176	0.694911	9
C12orf73	P1	0.562646	-0.0146207	-0.00365174	9	P2	0.328418	-0.0204324	10	P2	0.320628	-0.0569615	10
C12orf74	P1P2	0.208498	0.0302804	0.0206179	10	P1P2	0.310774	0.024218	10	P1P2	0.321635	0.183136	10
C12orf75	P1P2	0.791588	0.0644126	0.00653793	10	P1P2	0.920641	0.00212213	10	P1P2	0.929773	0.330425	10
C12orf76	P1P2	0.352951	0.218995	0.0990482	10	P1P2	0.442625	0.00171247	10	P1P2	0.306626	0.930875	9
C12orf77	P1P2	0.926429	0.196105	0.0065083	10	P1P2	0.858189	0.00575292	10	P1P2	0.978556	0.946004	9
C12orf79	P1P2	0.677975	0.100899	0.0170303	10	P1P2	0.00885099	0.0400235	10	P1P2	0.288842	0.973079	10
C12orf80	P1P2	0.0535446	-0.180078	-0.22893	9	P1P2	0.424364	0.0150361	9	P1P2	0.0823829	-0.514797	9
C13orf35	ENST00000356049.1	0.792846	0.0858013	0.00864974	9	ENST00000356049.1	0.294011	0.0424207	9	ENST00000356049.1	0.613049	0.874991	9
C13orf45	P1P2	0.873322	0.107937	0.00634945	10	P1P2	0.121475	0.0429522	10	P1P2	0.512886	0.798418	10
C14orf1	P1P2	0.583219	0.114851	0.0268945	10	P1P2	0.688094	-0.00721051	10	P1P2	0.527709	0.466539	10
C14orf105	P1P2	0.096196	-0.198053	-0.201389	10	P1P2	0.872519	-0.013736	10	P1P2	0.0719689	-0.62703	10
C14orf119	P1P2	0.171681	0.329922	0.252482	10	P1P2	0.583226	0.013922	10	P1P2	0.0871833	1.44691	10
C14orf132	P1P2	0.221678	-0.118561	-0.0775719	10	P1P2	0.564212	0.00559731	10	P1P2	0.343544	-0.274521	10
C14orf142	P1P2	0.988392	0.078182	0.000396432	10	P1P2	0.630456	-0.0163229	10	P1P2	0.876558	0.503547	10
C14orf159	P1P2	0.197567	-0.0417539	-0.0294067	9	P1P2	0.930797	-0.014298	10	P1P2	0.286437	-0.119362	10
C14orf164	P1P2	0.184448	-0.0988712	-0.0725839	10	P1P2	0.524802	0.0248895	10	P1P2	0.265969	-0.0909049	10
C14orf166	P1P2	0.867595	0.0215586	0.0013298	10	P1P2	0.0285554	-0.0888261	10	P1P2	0.171791	-0.119323	10
C14orf166B	P1P2	0.395399	0.221932	0.0894309	8	P1P2	0.371788	-0.0253427	8	P1P2	0.492425	0.945568	8
C14orf169	P1P2	0.158967	-0.116013	-0.0926592	9	P1P2	0.0262803	0.0317205	10	P1P2	0.449714	-0.0859022	10
C14orf177	ENST00000325812.2	0.874024	0.0848094	0.00495938	10	ENST00000325812.2	0.916792	0.0280491	10	ENST00000325812.2	0.85176	0.60693	10
C14orf178	P1P2	0.16712	-0.135162	-0.105017	10	P1P2	0.321628	-0.117483	10	P1P2	0.00803587	-0.639269	10
C14orf180	P2	0.309901	0.0386589	0.0196687	10	P2	0.238727	-0.0393485	10	P2	0.136193	0.0711667	10
C14orf182	P1P2	0.825758	0.104792	0.00871321	8	P1P2	0.405396	-0.0341126	9	P1P2	0.923136	0.450249	9
C14orf183	ENST00000305273.1	0.779375	0.0582139	0.00630187	10	ENST00000305273.1	0.664028	-0.0128314	10	ENST00000305273.1	0.947241	0.276203	10
C14orf2	P1P2	0.993604	0.12822	0.000357318	10	P1P2	0.0315983	-0.0768856	10	P1P2	0.451306	0.17857	10
C14orf28	P1P2	0.890006	0.0404434	0.00204672	8	P1P2	0.965542	-0.0578667	10	P1P2	0.865765	0.601408	10
C14orf37	ENST00000267485.7	0.0792839	-0.146644	-0.161428	7	ENST00000267485.7	0.765194	-0.0496942	9	ENST00000267485.7	0.131592	-0.607004	9
C14orf39	P1P2	0.0623849	0.322338	0.388391	10	P1P2	0.885267	0.00901417	10	P1P2	0.0616606	1.54593	10
C14orf79	P1P2	0.651093	-0.00853947	-0.00159139	8	P1P2	0.0629714	-0.128034	10	P1P2	0.300934	-0.303016	10
C14orf80	P1P2	0.463607	0.0023267	0.000776769	10	P1P2	0.771657	-0.028031	10	P1P2	0.347236	-0.056861	10
C14orf93	P1	0.310432	-0.053185	-0.0270197	9	P2	0.522028	0.00979223	10	P1	0.359697	-0.137371	10
C15orf26	ENST00000286732.4	0.968501	0.0338023	0.000469856	10	ENST00000286732.4	0.673443	-0.0216464	10	ENST00000286732.4	0.989417	0.0675974	10
C15orf27	P1P2	0.49327	0.0997202	0.0306057	10	P1P2	0.118465	0.00685176	10	P1P2	0.620471	0.699888	10
C15orf32	P1P2	0.0402333	-0.165221	-0.230551	10	P1P2	0.235928	-0.0565601	10	P1P2	0.0146112	-0.749861	10
C15orf38	P1P2	0.245737	0.121338	0.0739592	10	P1P2	0.545989	-0.0225819	10	P1P2	0.302673	0.558248	9
C15orf38-AP3S2	P2	0.229119	0.179948	0.115155	10	P2	0.320983	-0.0190739	10	P2	0.329898	0.777082	9
C15orf39	P1P2	0.136692	0.271614	0.234744	8	P1P2	0.232536	-0.0474287	8	P1P2	0.222915	1.07003	8
C15orf40	P1P2	0.20879	-0.0768561	-0.0522845	9	P1P2	0.0880105	-0.0689261	10	P1P2	0.0509212	-0.400401	10
C15orf41	P1P2	0.052186	0.265504	0.340495	7	P1P2	2.88839e-05	-0.192281	10	P1P2	0.8528	0.281292	10
C15orf43	P1P2	0.853482	-0.00144849	-9.96642e-05	10	P1P2	0.720712	0.0430326	10	P1P2	0.347841	0.67719	10
C15orf48	P1P2	0.293232	0.31935	0.170146	10	P1P2	0.408996	-0.00630665	10	P1P2	0.284509	1.37729	10
C15orf52	P1	0.371217	0.0016398	0.000705724	8	P2	0.464042	-0.0571357	10	P2	0.559483	-0.355547	10
C15orf53	P1P2	0.261349	-0.00795435	-0.00463562	10	P1P2	0.708321	-0.0172987	10	P1P2	0.24641	0.02131	10
C15orf54	P1P2	0.219218	-0.101614	-0.066976	10	P1P2	0.167068	0.00311216	10	P1P2	0.282722	-0.377144	10
C15orf56	P1P2	0.193748	0.183291	0.130643	10	P1P2	0.49806	0.012535	10	P1P2	0.12999	1.21517	10
C15orf57	P1P2	0.374431	0.168346	0.071821	10	P1P2	0.00397616	-0.098424	10	P1P2	0.941141	0.440119	10
C15orf59	P1P2	0.969164	0.167503	0.00227851	9	P1P2	0.0679775	-0.057755	10	P1P2	0.627039	0.69368	10
C15orf60	P1P2	0.830491	0.118636	0.00956975	10	P1P2	0.0676677	-0.0343911	10	P1P2	0.508152	0.400234	10
C15orf61	P1P2	0.637519	0.096538	0.0188739	8	P1P2	0.357323	-0.0838358	9	P1P2	0.744687	0.254553	9
C15orf62	P1P2	0.908168	0.140238	0.00586668	10	P1P2	0.978782	-0.00276475	10	P1P2	0.995532	0.681463	10
C15orf65	P1P2	0.371564	0.16961	0.0729266	10	P1P2	0.794231	-0.000949791	10	P1P2	0.40138	0.796727	10
C16orf11	P1P2	0.146832	-0.148613	-0.123821	9	P1P2	0.134078	-0.0641488	10	P1P2	0.0222055	-0.784485	10
C16orf13	P1P2	0.57915	0.167902	0.0398278	10	P1P2	0.884106	-0.0244503	10	P1P2	0.597875	0.803199	10
C16orf3	ENST00000408886.2	0.844775	0.0981398	0.00718961	9	ENST00000408886.2	0.380347	0.0371516	9	ENST00000408886.2	0.88732	0.693904	9
C16orf45	P1P2	0.692943	-0.0662061	-0.0105468	9	P1P2	0.0414107	0.049006	9	P1P2	0.932148	-0.0383638	9
C16orf46	P1P2	0.535197	0.10915	0.0296329	8	P1P2	0.102633	-0.0790569	10	P1P2	0.92462	0.279932	10
C16orf47	ENST00000358463.2	0.595618	-0.00176596	-0.000397397	9	ENST00000358463.2	0.551629	0.0406874	9	ENST00000358463.2	0.938326	0.47105	9
C16orf52	P1P2	0.229801	0.413228	0.263907	9	P1P2	0.219573	-0.101886	9	P1P2	0.327206	1.46254	9
C16orf54	P1P2	0.98555	0.0843561	0.000533246	10	P1P2	0.126575	-0.0653155	10	P1P2	0.478857	-0.0325107	10
C16orf58	P1P2	0.823436	0.135362	0.0114205	10	P1P2	0.138915	0.00860378	10	P1P2	0.692214	0.620082	10
C16orf59	P1P2	0.362577	0.145906	0.0642863	8	P1P2	0.00272329	-0.229988	9	P1P2	0.109877	-0.213633	9
C16orf62	P1P2	0.606768	0.161328	0.0350045	10	P1P2	0.0490869	-0.0436486	10	P1P2	0.912922	0.590098	10
C16orf70	P1P2	0.0404796	0.42103	0.586395	9	P1P2	0.0850157	-0.0628422	10	P1P2	0.0889679	1.64172	10
C16orf71	P1P2	0.790559	0.0109307	0.00111566	10	P1P2	0.965073	-0.0165754	10	P1P2	0.649145	0.403894	10
C16orf72	P1	0.39603	0.282321	0.11357	9	P2	0.00505527	-0.0977206	10	P2	0.253324	-0.541907	10
C16orf74	P1P2	0.162382	0.282446	0.222981	10	P1P2	0.234421	-0.0231116	10	P1P2	0.274743	0.885678	10
C16orf78	P1P2	0.917823	0.0753363	0.00280559	10	P1P2	0.0109963	0.0755132	10	P1P2	0.317051	0.763985	10
C16orf80	P1P2	0.514776	0.175024	0.0504737	10	P1P2	0.101248	-0.0659804	10	P1P2	0.996943	0.45354	10
C16orf82	P1P2	0.598571	0.125987	0.0280805	8	P1P2	0.875915	-0.0544779	9	P1P2	0.57181	0.483724	9
C16orf86	P1P2	0.0557309	-0.150479	-0.188686	10	P1P2	0.601306	0.0139172	10	P1P2	0.0692623	-0.522324	10
C16orf87	P1P2	0.103762	0.235916	0.232132	9	P1P2	0.1907	-0.138546	10	P1P2	0.425788	0.647247	10
C16orf89	P1P2	0.896765	0.146291	0.00692269	10	P1P2	0.85081	-0.025185	10	P1P2	0.851414	0.570935	10
C16orf90	P1P2	0.662818	0.232333	0.041496	9	P1P2	0.286522	0.019588	9	P1P2	0.595814	1.16351	9
C16orf91	P1P2	0.169735	0.250757	0.19314	10	P1P2	0.118951	0.0457011	10	P1P2	0.0698059	1.70473	10
C16orf92	P1P2	0.224801	0.244333	0.158377	9	P1P2	0.549316	-0.0224437	10	P1P2	0.223424	1.03224	10
C16orf93	P1P2	0.562646	-0.0240281	-0.00600138	9	P1P2	0.179973	-0.0191279	10	P1P2	0.525977	0.119675	10
C16orf95	P1P2	0.741501	0.0280545	0.00364395	10	P1P2	0.884686	0.00724439	10	P1P2	0.905796	0.158212	10
C16orf96	P1P2	0.63814	-0.0358615	-0.00699599	9	P1P2	0.190103	-0.0430024	10	P1P2	0.423906	-0.351953	10
C16orf97	ENST00000562818.1	0.0789499	-0.22561	-0.248768	10	ENST00000566314.1	0.114599	-0.0637325	10	ENST00000562818.1	0.100791	-0.732844	10
C17orf100	P1P2	0.215015	0.16574	0.110636	10	P1P2	0.000150259	-0.111228	10	P1P2	0.69864	-0.0150446	10
C17orf102	P1P2	0.871565	0.0300949	0.00179667	9	P1P2	0.599912	0.0247524	9	P1P2	0.656	0.370184	9
C17orf103	P1P2	0.43873	0.0712635	0.0254982	10	P1P2	0.172643	-0.0355524	10	P1P2	0.714744	0.444088	10
C17orf104	P1P2	0.113765	0.19823	0.187127	9	P1P2	0.674087	-0.0229833	10	P1P2	0.16595	0.956996	10
C17orf105	P1P2	0.393566	0.00958427	0.00388146	10	P1P2	0.968119	-0.0068555	10	P1P2	0.366697	0.0921798	10
C17orf107	P1P2	0.232064	0.148337	0.0941041	10	P1P2	0.575284	-0.0069903	10	P1P2	0.297299	1.02105	10
C17orf112	P1P2	0.499567	0.13434	0.0404909	10	P1P2	0.867545	0.00360071	10	P1P2	0.430599	0.919157	10
C17orf47	P1P2	0.258211	-0.0872849	-0.0513258	10	P1P2	0.230113	-0.0343628	10	P1P2	0.121329	-0.386719	10
C17orf49	P1	0.0212381	0.274223	0.458743	8	P1	1.36109e-05	-0.276061	10	P2	0.115868	0.959564	10
C17orf50	P1P2	0.160073	-0.0146398	-0.0116486	10	P1P2	0.0334467	0.0582834	10	P1P2	0.43657	0.403531	10
C17orf51	P1	0.508259	0.133741	0.0393086	9	P1	0.199992	-0.0298669	9	P1	0.750101	0.351843	9
C17orf53	P1P2	0.635013	0.0228943	0.00451515	9	P1P2	0.69077	-0.0118556	9	P1P2	0.687957	0.12092	9
C17orf58	P1P2	0.666387	-0.00125789	-0.000221733	10	P1P2	0.721372	0.0205292	10	P1P2	0.852223	-0.0596508	10
C17orf59	P1P2	0.176561	-0.108175	-0.0814673	8	P1P2	0.0427472	-0.0728015	10	P1P2	0.0515542	-0.598338	10
C17orf62	P1P2	0.0333999	-0.16172	-0.238739	8	P1P2	0.706481	-0.0129238	9	P1P2	0.160345	-0.476042	9
C17orf64	P1	0.285194	-0.108366	-0.0590444	10	P1	0.0707953	0.00408988	10	P1	0.371094	-0.357757	10
C17orf66	P1P2	0.596812	-0.0740535	-0.0166	9	P1P2	0.837585	-0.0149511	10	P1P2	0.605983	-0.244815	10
C17orf67	P1P2	0.538481	-0.00299902	-0.000806227	8	P1P2	0.0870268	-0.0801747	9	P1P2	0.367101	-0.340515	9
C17orf70	P1P2	0.311744	-0.0482521	-0.0244253	10	P1P2	0.0917953	-0.103336	10	P1P2	0.0724362	-0.870137	10
C17orf72	P1P2	0.0945642	-0.103154	-0.105658	9	P1P2	0.334732	0.0120805	9	P1P2	0.11549	-0.379774	8
C17orf74	P1P2	0.654098	0.13579	0.025034	9	P1P2	0.456454	-0.0303509	10	P1P2	0.792499	0.521595	10
C17orf75	P1P2	0.688219	0.124905	0.0202688	10	P1P2	0.324578	-0.037349	10	P1P2	0.751798	0.519247	10
C17orf77	ENST00000392620.1	0.0677621	0.261963	0.306239	10	ENST00000392620.1	0.0382091	-0.0455954	10	ENST00000392620.1	0.119254	1.02321	10
C17orf78	P1P2	0.867244	0.0138427	0.000856287	10	P1P2	0.316916	0.0252407	10	P1P2	0.978719	0.287519	10
C17orf80	P1P2	0.270479	0.23259	0.13208	9	P1P2	0.508809	-0.0332328	9	P1P2	0.307951	0.972342	9
C17orf82	P1P2	0.231542	0.00603677	0.00383558	10	P1P2	0.0531987	0.0321448	10	P1P2	0.557402	0.166823	10
C17orf85	P1P2	0.910522	0.0358707	0.00146028	10	P1P2	0.00297113	-0.0400579	10	P1P2	0.617146	-0.368945	10
C17orf89	P1P2	0.272282	0.267471	0.151116	10	P1P2	0.447618	-0.02669	10	P1P2	0.323148	1.23651	10
C17orf96	P1P2	0.118104	0.206217	0.191315	10	P1P2	0.0775295	-0.0469256	10	P1P2	0.181947	0.957768	10
C17orf97	P1P2	0.179058	-0.00944257	-0.00705367	10	P1P2	0.926827	0.00111292	10	P1P2	0.201649	0.0256466	10
C17orf98	P1P2	0.0937861	0.279715	0.287508	10	P1P2	0.792283	-0.0458714	9	P1P2	0.171283	1.02799	10
C17orf99	P1P2	0.0790006	0.333615	0.367767	10	P1P2	0.516788	0.00540876	10	P1P2	0.0441446	1.53401	10
C18orf21	P1P2	0.739819	0.0339042	0.0044372	10	P1P2	0.168199	0.0088802	10	P1P2	0.930124	0.506944	10
C18orf25	P1P2	0.931599	0.0705512	0.00217094	8	P1P2	0.239811	-0.0437369	9	P1P2	0.990951	0.37152	9
C18orf32	P1P2	0.235679	0.212302	0.133257	10	P1P2	0.398653	-0.0238888	10	P1P2	0.398904	0.669081	10
C18orf42	P1P2	0.476656	0.152746	0.0491529	10	P1P2	0.972922	0.0063232	10	P1P2	0.513456	1.2008	10
C18orf54	P1P2	0.48925	0.152093	0.0472201	10	P1P2	0.115684	-0.0930477	10	P1P2	0.909066	0.595064	10
C18orf56	P1P2	0.628097	0.015488	0.00312816	10	P1P2	0.506297	-0.0213828	10	P1P2	0.469817	-0.0298393	9
C18orf63	P1P2	0.977024	0.183278	0.00185016	10	P1P2	0.722912	-0.00711157	10	P1P2	0.988359	0.826818	10
C18orf8	P1P2	0.284957	0.0086516	0.00471703	9	P1P2	0.00445729	0.0491851	9	P1P2	0.614025	0.323666	8
C19orf10	P1P2	0.258023	0.269081	0.158311	10	P1P2	0.994255	0.000972159	10	P1P2	0.230737	1.64386	10
C19orf12	P1P2	0.180295	-0.0936105	-0.0696478	9	P1P2	0.546362	-0.00913505	9	P1P2	0.14476	-0.408474	9
C19orf18	P1P2	0.899467	0.0946955	0.0043574	10	P1P2	0.129968	0.0294198	10	P1P2	0.769309	0.624234	10
C19orf24	P1P2	0.937995	0.0970066	0.00269674	10	P1P2	0.227103	-0.0558924	10	P1P2	0.632168	0.173843	10
C19orf25	P1P2	0.872036	0.0407258	0.00242179	10	P1P2	0.0134087	-0.0678784	10	P1P2	0.313571	0.0953409	10
C19orf26	P1P2	0.487099	-0.0477658	-0.0149212	6	P1P2	0.00136032	-0.110777	8	P1P2	0.0586555	-0.63575	8
C19orf33	P1P2	0.306869	0.214584	0.110092	10	P1P2	0.853345	-0.00737619	10	P1P2	0.263154	0.816772	9
C19orf35	P1P2	0.873673	0.0608437	0.00356855	10	P1P2	0.066375	0.0348603	10	P1P2	0.616005	1.15112	10
C19orf38	P1P2	0.982894	0.0309502	0.000231925	9	P1P2	0.636476	-0.00885742	9	P1P2	0.873112	0.0950945	8
C19orf40	P1P2	0.328579	0.138217	0.0668085	10	P1P2	0.86119	-0.0173991	10	P1P2	0.353393	0.690857	10
C19orf43	P1P2	0.115203	-0.122441	-0.114916	9	P1P2	0.0122862	0.0472624	9	P1P2	0.357848	-0.0822581	9
C19orf44	P1P2	0.843183	0.05912	0.0043795	9	P1P2	0.908858	-0.00406856	9	P1P2	0.957623	0.346618	9
C19orf45	P2	0.790101	0.0287008	0.00293658	10	P2	0.0310325	-0.0426787	10	P2	0.450864	-0.330692	10
C19orf47	P2	0.0357777	0.280115	0.405154	10	P1	0.090807	-0.0346088	9	P2	0.0629187	1.27483	9
C19orf48	P1P2	0.529555	0.0804094	0.0222001	9	P1P2	0.98727	-0.0118664	9	P1P2	0.610325	0.441361	9
C19orf52	P1P2	0.0507587	0.214774	0.278023	10	P1P2	0.439314	-0.0215612	10	P1P2	0.0672987	1.24067	10
C19orf53	P1P2	0.250295	0.268699	0.161635	10	P1P2	0.161189	-0.0348922	10	P1P2	0.300246	0.630001	10
C19orf54	P1P2	0.341303	0.260742	0.12173	10	P1P2	0.587672	-0.0262951	10	P1P2	0.310678	1.0782	10
C19orf55	P1P2	0.437941	0.136658	0.0490035	10	P1P2	0.750945	0.00180257	10	P1P2	0.44443	0.717879	10
C19orf57	P1P2	0.245797	-0.0436539	-0.0266037	10	P1P2	0.663922	0.00580617	10	P1P2	0.332105	-0.240052	10
C19orf59	P1P2	0.135202	-0.0311414	-0.0270624	10	P1P2	0.308884	0.0457312	10	P1P2	0.273386	-0.0993686	10
C19orf60	P1P2	0.576614	0.11098	0.026537	10	P1P2	0.895951	-0.0165438	10	P1P2	0.565449	0.468948	10
C19orf66	P1P2	0.822397	0.0270607	0.00229796	10	P1P2	0.596304	-0.0194425	10	P1P2	0.431979	-0.0240539	10
C19orf67	P1P2	0.541665	0.172096	0.0458239	10	P1P2	0.951375	-0.00502427	10	P1P2	0.599513	0.818876	10
C19orf68	P1P2	0.441808	0.222874	0.0790681	10	P1P2	0.456188	-0.0635035	10	P1P2	0.646708	0.447672	10
C19orf69	P1P2	0.298275	0.109185	0.0573638	9	P1P2	0.569366	-0.022057	9	P1P2	0.367019	0.506115	9
C19orf70	P1P2	0.512958	0.266663	0.0773106	10	P1P2	0.98054	0.0105872	10	P1P2	0.491855	1.24755	10
C19orf71	P1P2	0.986734	0.107204	0.000621763	10	P1P2	0.616426	-0.025941	10	P1P2	0.682238	0.636579	10
C19orf73	P1P2	0.459229	-0.0565846	-0.0191239	9	P1P2	0.35603	0.0190383	9	P1P2	0.61425	0.095335	9
C19orf77	P1P2	0.0192393	-0.167871	-0.288034	9	P1P2	0.805684	-0.00236493	9	P1P2	0.0337962	-0.824666	9
C19orf80	P1P2	0.00879123	-0.204589	-0.420625	9	P1P2	0.81253	-0.0162175	10	P1P2	0.0161744	-0.974723	9
C19orf81	P1P2	0.200798	0.143722	0.100209	9	P1P2	0.402516	0.0185723	9	P1P2	0.1284	0.798555	9
C19orf82	P1P2	0.952766	0.120386	0.00252975	10	P1P2	0.723573	-0.0188918	10	P1P2	0.819768	-0.108058	10
C1D	P1P2	0.110051	0.284702	0.27286	10	P1P2	0.0421189	-0.0507023	10	P1P2	0.22119	1.24021	10
C1GALT1	P1P2	0.0372678	-0.165542	-0.236504	10	P1P2	0.705808	-0.0129772	10	P1P2	0.0155998	-0.717054	10
C1GALT1C1	P1P2	0.852201	0.0313755	0.00217927	10	P1P2	0.989214	-0.0257756	10	P1P2	0.712875	0.185948	10
C1QA	P1P2	0.279478	-0.00972353	-0.00538345	10	P1P2	0.511576	-0.0117368	10	P1P2	0.198493	-0.0749599	10
C1QB	P1P2	0.130214	-0.120724	-0.106882	9	P1P2	0.504843	0.00579169	9	P1P2	0.207206	-0.518169	9
C1QBP	P1P2	0.879876	0.238769	0.0132704	10	P1P2	0.0949512	-0.0878126	10	P1P2	0.567245	0.517226	10
C1QC	P1P2	0.978682	0.0436937	0.000408911	10	P1P2	0.52394	-0.0321284	10	P1P2	0.875628	-0.0407584	10
C1QL1	P1P2	0.672875	-0.0350951	-0.00603865	10	P1P2	0.340262	-0.0286622	10	P1P2	0.47066	-0.156886	10
C1QL2	P1P2	0.293436	0.154073	0.0820419	10	P1P2	0.69655	-0.0120895	10	P1P2	0.29688	0.614121	9
C1QL3	P1P2	0.993507	-0.00567215	-1.60478e-05	9	P1P2	0.0807312	0.014256	9	P1P2	0.51535	0.194252	9
C1QL4	P1P2	0.504554	0.0844568	0.0250915	9	P1P2	0.0314705	-0.0744683	10	P1P2	0.255166	0.0393138	10
C1QTNF1	P1P2	0.671468	0.0563929	0.00975457	10	P1P2	0.122148	0.039138	10	P1P2	0.37212	0.662551	10
C1QTNF2	P1P2	0.810025	0.0504617	0.00461731	9	P1P2	0.188394	0.0246532	9	P1P2	0.527157	0.589488	9
C1QTNF3	P1P2	0.408228	0.172479	0.0671109	7	P1P2	0.322831	-0.0216746	7	P1P2	0.578592	0.676004	7
C1QTNF4	P1P2	0.27534	0.214915	0.12038	9	P1P2	0.768151	0.00967035	9	P1P2	0.174734	1.21276	9
C1QTNF5	P1	0.456484	-0.025855	-0.00880554	10	P1	0.628577	0.00857976	10	P1	0.609487	-0.0848805	10
C1QTNF6	P1P2	0.477662	-0.0350465	-0.0112457	9	P1P2	0.722781	0.0200617	9	P1P2	0.55899	-0.108805	9
C1QTNF7	ENST00000444304.2	0.640791	0.225529	0.043591	10	ENST00000429690.1	0.723463	-0.0124037	10	ENST00000444304.2	0.457172	0.927144	10
C1QTNF8	P1P2	0.25658	-0.0821681	-0.0485431	9	P1P2	0.21216	-0.011153	9	P1P2	0.150991	-0.49167	8
C1QTNF9	ENST00000382071.2	0.0391339	-0.115342	-0.162337	10	ENST00000332018.4	0.84379	0.00984815	10	ENST00000382071.2	0.0366894	-0.434376	10
C1QTNF9B	ENST00000382137.3	0.347362	0.174926	0.080329	10	ENST00000382137.3	0.239959	0.0317076	10	ENST00000382137.3	0.189589	0.892136	10
C1QTNF9B-AS1	P1P2	0.483579	0.0242022	0.00763658	10	P1P2	0.190103	-0.0534547	10	P1P2	0.252529	-0.214849	10
C1R	P1P2	0.517943	0.178369	0.0509633	10	P1P2	0.763776	0.00495858	9	P1P2	0.477851	0.648929	10
C1RL	P1P2	0.0463425	-0.0549988	-0.0733695	10	P1P2	0.505076	0.0177111	10	P1P2	0.0792419	-0.229642	10
C1S	P1P2	0.722067	0.047055	0.00665463	10	P1P2	0.124508	-0.0754784	10	P1P2	0.227031	-0.108982	10
C1orf100	P1P2	0.144235	-0.164056	-0.137959	10	P1P2	0.771881	-0.0110401	10	P1P2	0.0894395	-0.707856	10
C1orf101	P1P2	0.972284	0.0833592	0.00101757	9	P1P2	0.419581	-0.0392358	10	P1P2	0.806323	0.198558	9
C1orf105	ENST00000367727.4	0.528473	0.109149	0.0302318	10	ENST00000367727.4	0.278371	0.0318716	10	ENST00000367727.4	0.410073	0.698531	9
C1orf106	P2	0.583118	0.111024	0.0260068	10	P1	0.309602	-0.0632392	9	P1	0.351066	-0.0554153	9
C1orf109	P1	0.410152	0.172757	0.0668665	10	P1	0.100515	-0.0432329	10	P2	0.616982	0.495957	9
C1orf110	P2	0.503954	0.0184265	0.0054839	9	P2	0.0608172	-0.0529086	10	P2	0.318122	0.0614255	10
C1orf111	P1P2	0.463698	0.128522	0.042896	10	P1P2	0.00512248	0.0758567	10	P1P2	0.181609	1.30179	10
C1orf112	P1P2	0.0579126	-0.124599	-0.154157	10	P1P2	0.531914	0.0114994	10	P1P2	0.0723659	-0.418135	10
C1orf115	P1P2	0.718401	0.132458	0.0190253	10	P1P2	0.33722	0.0207029	10	P1P2	0.440315	0.884642	10
C1orf116	P1P2	0.802029	0.0213207	0.00204274	9	P1P2	0.344604	0.0122483	9	P1P2	0.969388	0.180313	9
C1orf122	P1P2	0.0662692	0.320809	0.378134	9	P1P2	0.608691	-0.0278776	10	P1P2	0.0177195	1.71878	10
C1orf123	P1P2	0.313594	0.145423	0.0732398	10	P1P2	0.816408	-0.0431353	10	P1P2	0.584641	0.831617	10
C1orf127	P1P2	0.236736	-0.0781473	-0.0488996	9	P1P2	0.562327	-0.0363753	10	P1P2	0.214096	-0.502859	10
C1orf131	P1P2	0.589836	-0.00445686	-0.00102182	8	P1P2	0.157444	-0.172869	10	P1P2	0.130551	-0.145493	10
C1orf134	ENST00000375605.2	0.482561	-0.0288161	-0.0091188	10	ENST00000375605.2	0.398571	0.0308015	10	ENST00000375605.2	0.723451	0.0550886	10
C1orf137	ENST00000369482.1	0.256838	0.249614	0.147357	10	ENST00000369482.1	0.791739	0.0211775	10	ENST00000369482.1	0.154547	0.867922	10
C1orf141	P1P2	0.690406	0.144841	0.0233042	10	P1P2	0.025265	-0.0783598	10	P1P2	0.318336	0.300685	10
C1orf146	P1P2	0.909536	0.15289	0.00629602	9	P1P2	0.579501	-0.020037	9	P1P2	0.960099	0.556237	9
C1orf158	P1P2	0.881929	0.053491	0.00291881	9	P1P2	0.605301	-0.01111	10	P1P2	0.917833	0.232179	10
C1orf159	P1P2	0.226539	0.276397	0.178236	9	P1P2	0.645679	-0.00652201	9	P1P2	0.216705	0.892257	9
C1orf162	P1P2	0.254665	-0.0185966	-0.011047	10	P1P2	0.369443	0.0303346	10	P1P2	0.444342	0.058645	10
C1orf167	P1P2	0.270858	-0.0817845	-0.0463929	10	P1P2	0.889329	0.00792375	10	P1P2	0.27891	-0.241976	10
C1orf168	P1P2	0.158826	-0.120227	-0.0960705	8	P1P2	0.0215162	0.0609668	8	P1P2	0.539599	-0.174571	7
C1orf172	P1P2	0.551087	0.018426	0.00476827	9	P1P2	0.247009	-0.0368536	9	P1P2	0.291588	0.0482592	9
C1orf173	P1P2	0.24944	0.272907	0.164572	10	P1P2	0.256571	0.017998	10	P1P2	0.129207	1.22181	10
C1orf174	P1P2	0.410429	-0.00797784	-0.00308552	8	P1P2	0.700139	-0.0570114	10	P1P2	0.306407	-0.22687	10
C1orf177	P1P2	0.221649	0.112256	0.0734531	9	P1P2	0.318162	-0.0236713	9	P1P2	0.32035	0.505327	9
C1orf185	P1P2	0.580878	0.137915	0.0325362	10	P1P2	0.890258	-0.00497212	10	P1P2	0.483353	0.813877	10
C1orf186	P1P2	0.57976	-0.00839845	-0.00198835	10	P1P2	0.273192	-0.0358585	10	P1P2	0.329833	-0.136772	10
[truncated: 35,840 more rows]

## Sheet: Cri_H
Pfeiffer CRISPRi Doxorubicin screen
[truncated: 37,812 more rows]

[truncated: 5 more sheets: Cri_R, Cri_C_5sgRNAspergene, Cra_O, Cra_C, Cra_H]
