# Supplementary material for: A curative combination cancer therapy achieves high fractional cell killing through low cross-resistance and drug additivity
Source: eLife. 2019 Nov 19;8:e50036. doi: 10.7554/eLife.50036 (PMC6897534; doi:10.7554/eLife.50036)
Supplement: Figure 6—source data 1. [file elife-50036-fig6-data1.xlsx]

## Sheet: Pfeiffer CRISPRi
		sgRNA:
Drug		neg cntrl 1	neg cntrl 2	CAD_+_27440356.23-P1P2	EIF4G2_+_10830435.23-P1	MED12_+_70338519.23-P1P2	MS4A1_+_60223356.23-P1P2	POU2F2_+_42636228.23-P1P2	SETDB1_-_150899156.23-P1P2	STAT6_+_57505147.23-P1P2	TOP2A_-_38573777.23-P1P2	UBR5_+_103424470.23-P1P2
Rituximab	Log2(IC50)-Log2(IC50wt)	0.07	-0.07	0.07	0	-0.23	1.59	-0.23	0.27	0.07	0.03	-0.07
	95% confidence interval	0.13	0.13	0.17	0.17	0.13	0	0.13	0.13	0.13	0.1	0.13
4HC	Log2(IC50)-Log2(IC50wt)	0.03	-0.03	0.37	0.6	0.33	0.2	0.07	0.56	0.33	0.23	0.3
	95% confidence interval	0.17	0.13	0.17	0.17	0.17	0.17	0.13	0.2	0.17	0.17	0.2
Doxorubicin	Log2(IC50)-Log2(IC50wt)	0	0	0.66	1.26	0.5	0.17	0.53	0.5	0.3	0.76	0.07
	95% confidence interval	0.13	0.13	0.17	0.13	0.17	0.13	0.13	0.13	0.17	0.17	0.17
Vincristine	Log2(IC50)-Log2(IC50wt)	0	0	0.1	-0.13	-0.03	0.17	0.03	0.07	0.2	-0.03	0.13
	95% confidence interval	0.13	0.13	0.17	0.1	0.13	0.13	0.13	0.13	0.13	0.13	0.13

## Sheet: K562 CRISPRa
		sgRNA:
Drug		neg cntrl 1	neg cntrl 2	ABCB1_-_87342724.23-ENST00000265724.3	ABCC1_+_16043347.23-P1P2	ABCG2_-_89080233.23-P1P2	ANP32B_+_100745411.23-P1P2	ANP32B_+_100745464.23-P1P2	GCLC_-_53410024.23-P1P2	NFE2L2_+_178129667.23-P1	SOX18_+_62681082.23-P1P2	TOB1_+_48943794.23-P1P2	TOB1_-_48943950.23-P1P2
4HC	Log2(IC50)-Log2(IC50wt)	0.03	-0.03	0.23	0.1	0.07	-0.03	0.07	0.66	0.9	-0.1	0.1	0.17
	95% confidence interval	0.37	0.33	0.27	0.3	0.37	0.3	0.27	0.37	0.27	0.3	0.33	0.27
Doxorubicin	Log2(IC50)-Log2(IC50wt)	-0.07	0.07	1.43	1.3	0.9	0.07	0.03	0.3	0.53	-0.13	0.33	-0.07
	95% confidence interval	0.43	0.5	0.5	0.63	0.4	0.4	0.4	0.5	0.53	0.53	0.3	0.4
Vincristine	Log2(IC50)-Log2(IC50wt)	-0.03	0.03	3.85	2.49	0.03	0.03	-0.1	0.53	1.03	-0.23	0.37	0.23
	95% confidence interval	0.13	0.17	0.8	0.4	0.13	0.17	0.17	0.2	0.17	0.13	0.17	0.23

## Sheet: Pfeiffer CRISPRa
		sgRNA:
Drug		neg cntrl 1	neg cntrl 2	ABCB1_-_87342724.23-ENST00000265724.3	ABCC1_+_16043347.23-P1P2	ABCG2_-_89080233.23-P1P2	ANP32B_+_100745411.23-P1P2	GCLC_-_53410024.23-P1P2	NFE2L2_+_178129667.23-P1	SOX18_+_62681082.23-P1P2	TOB1_+_48943794.23-P1P2
Rituximab	Log2(IC50)-Log2(IC50wt)	0.07	-0.07	-0.37	-0.3	-0.4	0.1	-0.13	-0.23	-0.33	-0.37
	95% confidence interval	0.27	0.3	0.27	0.33	0.33	0.3	0.37	0.33	0.23	0.23
4HC	Log2(IC50)-Log2(IC50wt)	0	0	-0.07	-0.07	0.03	0.07	0	0.2	0.1	-0.07
	95% confidence interval	0.3	0.3	0.3	0.3	0.3	0.3	0.27	0.23	0.27	0.23
Doxorubicin	Log2(IC50)-Log2(IC50wt)	0.03	-0.03	0.1	0.17	-0.3	-0.07	0.2	-0.07	-0.1	-0.07
	95% confidence interval	0.2	0.2	0.23	0.17	0.23	0.23	0.23	0.3	0.23	0.2
Vincristine	Log2(IC50)-Log2(IC50wt)	0.03	-0.03	1.3	0.4	-0.2	-0.1	0.03	0.13	0.03	0.2
	95% confidence interval	0.17	0.23	0.4	0.23	0.13	0.13	0.1	0.17	0.13	0.2

## Sheet: Pfeiffer CRISPRa, competition
		Results from competition assay			Results from genome-wide screen
Gene	Drug	Log2(Nmutant/Ncontrol)	Standard error of the mean		Aggregate phenotype
ABCB1	4HC	0.43	0.05		0.17
ABCC1	4HC	0.01	0.07		0.01
ABCG2	4HC	0.9	0.15		0.1
ANP32B	4HC	0.8	0.09		1.1
GCLC	4HC	1.1	0.07		3.96
NFE2L2	4HC	0.65	0.1		3.53
SOX18	4HC	1.22	0.26		2.36
TOB1	4HC	0	0.03		0.76
ABCB1	Doxorubicin	3.44	0.1		3.7
ABCC1	Doxorubicin	2.9	0.06		4.57
ABCG2	Doxorubicin	0.49	0.06		5.26
ANP32B	Doxorubicin	-0.22	0.04		1.01
GCLC	Doxorubicin	1.99	0.08		1.32
NFE2L2	Doxorubicin	0.61	0.04		0.76
SOX18	Doxorubicin	-0.01	0.25		0.24
TOB1	Doxorubicin	0.04	0.1		1.65
ABCB1	Vincristine	8.69	0.22		7.62
ABCC1	Vincristine	3.04	0.1		7.56
ABCG2	Vincristine	0.11	0.06		0
ANP32B	Vincristine	-0.22	0.13		0.66
GCLC	Vincristine	1.47	0.09		4.09
NFE2L2	Vincristine	0.33	0.05		4.9
SOX18	Vincristine	1.14	0.34		2.98
TOB1	Vincristine	0.53	0.06		1.55
ABCB1	Rituximab	-0.47	0.04		Unavailable;
ABCC1	Rituximab	-1.27	0.05		overexpression
ABCG2	Rituximab	-0.36	0.06		screen was
ANP32B	Rituximab	0.73	0.06		performed
GCLC	Rituximab	-0.79	0.05		in K562 line
NFE2L2	Rituximab	-2.24	0.16		which is
SOX18	Rituximab	-1.6	0.35		not sensitive
TOB1	Rituximab	0.96	0		to Rituximab
