# Supplementary material for: A curative combination cancer therapy achieves high fractional cell killing through low cross-resistance and drug additivity
Source: eLife. 2019 Nov 19;8:e50036. doi: 10.7554/eLife.50036 (PMC6897534; doi:10.7554/eLife.50036)
Supplement: Figure 7—source data 1. — This data was extracted from Figure 5—source data 3. [file elife-50036-fig7-data1.xlsx]

## Sheet: Sheet1
	Gamma growth scores (i.e. DMSO vs T=0)
Gene	Transcript	Mann-Whitney p-value	Average phenotype of strongest 5	# of sgRNAs passing read count filter
CAD	P1P2	5.89e-08	-0.31232	10
EIF4G2	P1	1.4e-05	-0.28846	10
SETDB1	P1P2	1.79e-06	-0.2403	10
MED12	P1P2	8.93e-07	-0.25856	10
UBR5	P1P2	2.08e-07	-0.22833	10
