# Supplementary material for: A curative combination cancer therapy achieves high fractional cell killing through low cross-resistance and drug additivity
Source: eLife. 2019 Nov 19;8:e50036. doi: 10.7554/eLife.50036 (PMC6897534; doi:10.7554/eLife.50036)
Supplement: Supplementary file 1. [file elife-50036-supp1.xlsx]

## Sheet: Oligonucleotides
Oligonucleotide Name	Sequence	Description
CC_LSP_001	TTGGGGCGCGGGTCCGGCCTGGGAGGTTTAAGAGC	ST3GAL4 sgRNA construction (CRISPRi)
CC_LSP_002	TTAGCTCTTAAACCTCCCAGGCCGGACCCGCGCCCCAACAAG	ST3GAL4 sgRNA construction (CRISPRi)
CC_LSP_003	TTGGCAGGAAGAGCAGCGGCGAGGGTTTAAGAGC	SEL1L sgRNA construction (CRISPRi)
CC_LSP_004	TTAGCTCTTAAACCCTCGCCGCTGCTCTTCCTGCCAACAAG	SEL1L sgRNA construction (CRISPRi)
CC_LSP_005	TTGGTATCCGGGGCAGCGGAGCAGTTTAAGAGC	DPH1 sgRNA construction (CRISPRi)
CC_LSP_006	TTAGCTCTTAAACTGCTCCGCTGCCCCGGATACCAACAAG	DPH1 sgRNA construction (CRISPRi)
CC_LSP_079	TTGGCTGCATGGGGCGCGAATCAGTTTAAGAGC	non-targeting sgRNA control 1 construction (CRISPRi)
CC_LSP_080	TTAGCTCTTAAACTGATTCGCGCCCCATGCAGCCAACAAG	non-targeting sgRNA control 1 construction (CRISPRi)
CC_LSP_081	TTGGTGCACCCGGCTAGGACCGGGTTTAAGAGC	non-targeting sgRNA control 2 construction (CRISPRi)
CC_LSP_082	TTAGCTCTTAAACCCGGTCCTAGCCGGGTGCACCAACAAG	non-targeting sgRNA control 2 construction (CRISPRi)
CC_LSP_007	TTGGCCGGGGCGCGCGGCTGATTGGGTTTAAGAGC	CDKN1C sgRNA construction (CRISPRa)
CC_LSP_008	TTAGCTCTTAAACCCAATCAGCCGCGCGCCCCGGCCAACAAG	CDKN1C sgRNA construction (CRISPRa)
CC_LSP_009	TTGGTCAGGAGAACCATGGGGACCGTTTAAGAGC	SLC4A1 sgRNA construction (CRISPRa)
CC_LSP_010	TTAGCTCTTAAACGGTCCCCATGGTTCTCCTGACCAACAAG	SLC4A1 sgRNA construction (CRISPRa)
CC_LSP_011	TTGGGATGTTTGCCTAATGGTGGGTTTAAGAGC	POU5F1 sgRNA construction (CRISPRa)
CC_LSP_012	TTAGCTCTTAAACCCACCATTAGGCAAACATCCCAACAAG	POU5F1 sgRNA construction (CRISPRa)
CC_LSP_111	TTGGTGTCGTGATGCGTAGACGGGTTTAAGAGC	non-targeting sgRNA control 1 construction (CRISPRa)
CC_LSP_112	TTAGCTCTTAAACCCGTCTACGCATCACGACACCAACAAG	non-targeting sgRNA control 1 construction (CRISPRa)
CC_LSP_113	TTGGTCATCAAGGAGCATTCCGTGTTTAAGAGC	non-targeting sgRNA control 2 construction (CRISPRa)
CC_LSP_114	TTAGCTCTTAAACACGGAATGCTCCTTGATGACCAACAAG	non-targeting sgRNA control 2 construction (CRISPRa)
CC_LSP_013	GATCACGCTCAAGTCCATGG	ST3GAL4 qPCR fwd
CC_LSP_014	CTTGCCCAGGTCAGAAGGA	ST3GAL4 qPCR rev
CC_LSP_015	GAGGGGGAAAGTGTCACAGA	SEL1L qPCR fwd
CC_LSP_016	GGTCAAAGCTGGTTTCCGTA	SEL1L qPCR rev
CC_LSP_133	TGGAGGCCGTTGTGTATCTT	DPH1 qPCR fwd
CC_LSP_134	GACATTGGGGTTGGCAATCA	DPH1 qPCR rev
GAPDH78for	GGACTCATGACCACAGTCCA	GAPDH qPCR fwd
GAPDH78rev	GATGTTCTGGAGAGCCCCG	GAPDH qPCR rev
CC_LSP_143	TGATCTCCGATTTCTTCGCCA	CDKN1C qPCR fwd
CC_LSP_144	CTAAATTGGCTCACCGCAGC	CDKN1C qPCR rev
CC_LSP_135	TTGCGTTCCGAGTTTCCCAT	SLC4A1 qPCR fwd
CC_LSP_136	ATCTTGCGCTCAGGTTTGCT	SLC4A1 qPCR rev
CC_LSP_137	AAACCCACACTGCAGCAGAT	POU5F1 qPCR fwd
CC_LSP_138	TAGTCGCTGCTTGATCGCTT	POU5F1 qPCR rev
CC_LSP_025	AAT GAT ACG GCG ACC ACC GA ACA CTC TTT CCC TAC ACG ACG CTC TTC CGA TCT CCT TGG AGA ACC ACC TTG TTG	Crispr screen fwd
CC_LSP_026	AAT GAT ACG GCG ACC ACC GA ACA CTC TTT CCC TAC ACG ACG CTC TTC CGA TCT A CCT TGG AGA ACC ACC TTG TTG	Crispr screen fwd
CC_LSP_027	AAT GAT ACG GCG ACC ACC GA ACA CTC TTT CCC TAC ACG ACG CTC TTC CGA TCT AG CCT TGG AGA ACC ACC TTG TTG	Crispr screen fwd
CC_LSP_028	AAT GAT ACG GCG ACC ACC GA ACA CTC TTT CCC TAC ACG ACG CTC TTC CGA TCT GAG CCT TGG AGA ACC ACC TTG TTG	Crispr screen fwd
CC_LSP_029	AAT GAT ACG GCG ACC ACC GA ACA CTC TTT CCC TAC ACG ACG CTC TTC CGA TCT TTAG CCT TGG AGA ACC ACC TTG TTG	Crispr screen fwd
CC_LSP_030	AAT GAT ACG GCG ACC ACC GA ACA CTC TTT CCC TAC ACG ACG CTC TTC CGA TCT GTAGA CCT TGG AGA ACC ACC TTG TTG	Crispr screen fwd
CC_LSP_031	AAT GAT ACG GCG ACC ACC GA ACA CTC TTT CCC TAC ACG ACG CTC TTC CGA TCT CAGAAA CCT TGG AGA ACC ACC TTG TTG	Crispr screen fwd
CC_LSP_032	AAT GAT ACG GCG ACC ACC GA ACA CTC TTT CCC TAC ACG ACG CTC TTC CGA TCT TGTAGAA CCT TGG AGA ACC ACC TTG TTG	Crispr screen fwd
CC_LSP_033	CAA GCA GAA GAC GGC ATA CGA GAT TACAAG GTG ACT GGA GTT CAG ACG TGT GCT CTT CCG ATC CGA CTC GGT GCC ACT TTT TC	Crispr screen rev index 1
CC_LSP_034	CAA GCA GAA GAC GGC ATA CGA GAT ATTGGC GTG ACT GGA GTT CAG ACG TGT GCT CTT CCG ATC CGA CTC GGT GCC ACT TTT TC	Crispr screen rev index 2
CC_LSP_035	CAA GCA GAA GAC GGC ATA CGA GAT GGAACT GTG ACT GGA GTT CAG ACG TGT GCT CTT CCG ATC CGA CTC GGT GCC ACT TTT TC	Crispr screen rev index 3
CC_LSP_036	CAA GCA GAA GAC GGC ATA CGA GAT AAGCTA GTG ACT GGA GTT CAG ACG TGT GCT CTT CCG ATC CGA CTC GGT GCC ACT TTT TC	Crispr screen rev index 4
CC_LSP_037	CAA GCA GAA GAC GGC ATA CGA GAT GCCTAA GTG ACT GGA GTT CAG ACG TGT GCT CTT CCG ATC CGA CTC GGT GCC ACT TTT TC	Crispr screen rev index 5
CC_LSP_038	CAA GCA GAA GAC GGC ATA CGA GAT CGTGAT GTG ACT GGA GTT CAG ACG TGT GCT CTT CCG ATC CGA CTC GGT GCC ACT TTT TC	Crispr screen rev index 6
CC_LSP_039	CAA GCA GAA GAC GGC ATA CGA GAT CCACTC GTG ACT GGA GTT CAG ACG TGT GCT CTT CCG ATC CGA CTC GGT GCC ACT TTT TC	Crispr screen rev index 7
CC_LSP_040	CAA GCA GAA GAC GGC ATA CGA GAT TTGACT GTG ACT GGA GTT CAG ACG TGT GCT CTT CCG ATC CGA CTC GGT GCC ACT TTT TC	Crispr screen rev index 8
CC_LSP_189	TTGGTAGGACGCACCCCTAGAATGTTTAAGAGC	SETDB1_-_150899156.23-P1P2
CC_LSP_190	TTAGCTCTTAAACATTCTAGGGGTGCGTCCTACCAACAAG
CC_LSP_191	TTGGCCTCGAGTGGAGGACGAGAGTTTAAGAGC	UBR5_+_103424470.23-P1P2
CC_LSP_192	TTAGCTCTTAAACTCTCGTCCTCCACTCGAGGCCAACAAG
CC_LSP_195	TTGGGGAGAGGGAGCCGAAAAGGGTTTAAGAGC	MED12_+_70338519.23-P1P2
CC_LSP_196	TTAGCTCTTAAACCCTTTTCGGCTCCCTCTCCCCAACAAG
CC_LSP_199	TTGGAGCTCTATGGAGGTGGCAGGTTTAAGAGC	EIF4G2_+_10830435.23-P1
CC_LSP_200	TTAGCTCTTAAACCTGCCACCTCCATAGAGCTCCAACAAG
CC_LSP_203	TTGGGAAGGACTGCAAACTCCACGTTTAAGAGC	CAD_+_27440356.23-P1P2
CC_LSP_204	TTAGCTCTTAAACGTGGAGTTTGCAGTCCTTCCCAACAAG
CC_LSP_207	TTGGCCTCATGTGGAGAACCAGTGTTTAAGAGC	POU2F2_+_42636228.23-P1P2
CC_LSP_208	TTAGCTCTTAAACACTGGTTCTCCACATGAGGCCAACAAG
CC_LSP_211	TTGGGGATCCACTACGGGACCAAGTTTAAGAGC	TOP2A_-_38573777.23-P1P2
CC_LSP_212	TTAGCTCTTAAACTTGGTCCCGTAGTGGATCCCCAACAAG
CC_LSP_215	TTGGAGGAGAAGCCGGAAACAGCGTTTAAGAGC	STAT6_+_57505147.23-P1P2
CC_LSP_216	TTAGCTCTTAAACGCTGTTTCCGGCTTCTCCTCCAACAAG
CC_LSP_219	TTGGTGCTAGCTGCGGAGTTCAGGTTTAAGAGC	MS4A1_+_60223356.23-P1P2
CC_LSP_220	TTAGCTCTTAAACCTGAACTCCGCAGCTAGCACCAACAAG
CC_LSP_221	TTGGACCTCGCGCGTCTCGGCGTGTTTAAGAGC	ABCC1_+_16043347.23-P1P2
CC_LSP_222	TTAGCTCTTAAACACGCCGAGACGCGCGAGGTCCAACAAG
CC_LSP_223	TTGGAAAACCCAAGGATAAGTTTGTTTAAGAGC	ABCB1_-_87342724.23-ENST00000265724.3
CC_LSP_224	TTAGCTCTTAAACAAACTTATCCTTGGGTTTTCCAACAAG
CC_LSP_225	TTGGGTACCACCGCCCTCCCTCGGTTTAAGAGC	ABCG2_-_89080233.23-P1P2
CC_LSP_226	TTAGCTCTTAAACCGAGGGAGGGCGGTGGTACCCAACAAG
CC_LSP_227	TTGGGGCTCAGGAGGCGTGTGCAGTTTAAGAGC	GCLC_-_53410024.23-P1P2
CC_LSP_228	TTAGCTCTTAAACTGCACACGCCTCCTGAGCCCCAACAAG
CC_LSP_229	TTGGGCCGGCACCGGGGAGCTAAGTTTAAGAGC	NFE2L2_+_178129667.23-P1
CC_LSP_230	TTAGCTCTTAAACTTAGCTCCCCGGTGCCGGCCCAACAAG
CC_LSP_231	TTGGCGCGGCGGACGCAGGGGTGGTTTAAGAGC	TOB1_-_48943950.23-P1P2
CC_LSP_232	TTAGCTCTTAAACCACCCCTGCGTCCGCCGCGCCAACAAG
CC_LSP_235	TTGGAAAGGCGCAGCCCGAATAGGTTTAAGAGC	ANP32B_+_100745411.23-P1P2
CC_LSP_236	TTAGCTCTTAAACCTATTCGGGCTGCGCCTTTCCAACAAG
CC_LSP_239	TTGGAGAAGAAAGGGAGCCCCCGGTTTAAGAGC	SOX18_+_62681082.23-P1P2
CC_LSP_240	TTAGCTCTTAAACCGGGGGCTCCCTTTCTTCTCCAACAAG
CC_LSP_243	GACGAATCTTCCCGGCCTAC	SETDB1 qPCR 121 bp
CC_LSP_244	TAGCTTCACGGAGCTTCTGG
CC_LSP_245	AGTGGATGAGGCCATGGAAC	UBR5 qPCR 112 bp
CC_LSP_246	TCGGTTTTCCTGCTGTACCT
CC_LSP_247	GCATGAGGCACTCAAACTGC	MED12 qPCR 149bp
CC_LSP_248	AGAGCTCATTGTTGGACTGC
CC_LSP_249	ACAGCAACTTCCCAAAAGGC	EIF4G2 qPCR 149 bp
CC_LSP_250	CTGATTCACCTGGAACAAAGCC
CC_LSP_251	GAGCTGCATGAAGAGCGTTG	CAD qPCR 141 bp
CC_LSP_252	TCCAACTCCATATCGCTGACTG
CC_LSP_253	GAGAAACGCATCAACCCCTG	POU2F2 qPCR 122 bp
CC_LSP_254	GCTTGGGACAACGGTAAGGT
CC_LSP_255	TCTGGTCCTGAAGATGATGCT	TOP2A qPCR 135bp
CC_LSP_256	CAAGTAATCCTCAGGAAGCCC
CC_LSP_257	TCCTGGTCGCAGTTCAACAA	STAT6 qPCR 134 bp
CC_LSP_258	ATGAAGCCAATGATCAGCCGGT
CC_LSP_275	AGCTGGCATCGTTGAGAATGA	MS4A1 qPCR 129bp
CC_LSP_276	TCAGTTAGCCCAACCACTTC
CC_LSP_259	ACTCATTGCAGGTCACCACG	ABCC1 qPCr 140bp
CC_LSP_260	AGCTGTCTCCTGGATTTGCC
CC_LSP_261	TCCGATCCATGCTCAGACAG	ABCB1 qPCR 119bp
CC_LSP_262	CCTGGAACCTATAGCCCCTT
CC_LSP_263	TCAGCTGGTTATCACTGTGAGG	ABCG2 qPCR 139bp
CC_LSP_264	CCTGCTTGGAAGGCTCTATGA
CC_LSP_265	CTCACCAGAGTGATCCTTTCCT	GCLC qPCR 150 bp
CC_LSP_266	CACTGCATTGCCACCTTTGC
CC_LSP_267	AACTACTCCCAGGTTGCCCA	NFE2L2 qPCR 79 bp
CC_LSP_268	ATGTCTGCGCCAAAAGCTG
CC_LSP_269	TTTTGCTGCCACCAAGTTCG	TOB1 qPCR 76 bp
CC_LSP_270	GGGAGAAGTACGTGCAACCT
CC_LSP_271	ATCTCCCCAAGCTGCCTAAA	ANP32B qPCR 76 bp
CC_LSP_272	GCTAACATGTCCAGACCTCC
CC_LSP_273	CAGCAAGATGCTGGGCAAAG	SOX18 qPCR 116 bp
CC_LSP_274	ACTTGTAGTTGGGGTGGTCG
pU6_111	GTGTCGTGATGCGTAGACGG	forward primer for qPCR quantification of non-targeting sgRNA control 1
pU6_221	GCGTCTCGGCGTGTTTAAG	forward primer for qPCR quantification of ABCC1 sgRNA
pU6_223	GTTGGAAAACCCAAGGATAAG	forward primer for qPCR quantification of ABCB1 sgRNA
pU6_225	CGCCCTCCCTCGGTTTAAG	forward primer for qPCR quantification of ABCG2 sgRNA
pU6_227	GGAGGCGTGTGCAGTTTAAG	forward primer for qPCR quantification of GCLC sgRNA
pU6_229	CACCGGGGAGCTAAGTTTAAG	forward primer for qPCR quantification of NFE2L2 sgRNA
pU6_233	GAGCTGTGTGACGGTTTAAG	forward primer for qPCR quantification of TOB1 sgRNA
pU6_235	GAAAGGCGCAGCCCGAATAG	forward primer for qPCR quantification of ANP32B sgRNA
pU6_239	GAAAGGGAGCCCCCGGTTTAAG	forward primer for qPCR quantification of SOX18 sgRNA
pX330rev2	CGACTCGGTGCCACTTTTTC	common reverse primer for qPCR quantification of sgRNA-containing gDNA samples

## Sheet: sgRNA protospacers
Target gene	Downregulation/Overexpression	sgRNA protospacers
ST3GAL4	CRISPRi	GGGCGCGGGTCCGGCCTGGGAG
SEL1L	CRISPRi	GCAGGAAGAGCAGCGGCGAGG
DPH1	CRISPRi	GTATCCGGGGCAGCGGAGCA
non targeting sgRNA control 1	CRISPRi	GCTGCATGGGGCGCGAATCA
non targeting sgRNA control 2	CRISPRi	GTGCACCCGGCTAGGACCGG
CDKN1C	CRISPRa	GCCGGGGCGCGCGGCTGATTGG
SLC4A1	CRISPRa	GTCAGGAGAACCATGGGGACC
POU5F1	CRISPRa	GGATGTTTGCCTAATGGTGG
non targeting sgRNA control 1	CRISPRa	GTGTCGTGATGCGTAGACGG
non targeting sgRNA control 2	CRISPRa	GTCATCAAGGAGCATTCCGT
SETDB1_-_150899156.23-P1P2	CRISPRi	GTAGGACGCACCCCTAGAAT
UBR5_+_103424470.23-P1P2	CRISPRi	GCCTCGAGTGGAGGACGAGA
MED12_+_70338519.23-P1P2	CRISPRi	GGGAGAGGGAGCCGAAAAGG
EIF4G2_+_10830435.23-P1	CRISPRi	GAGCTCTATGGAGGTGGCAG
CAD_+_27440356.23-P1P2	CRISPRi	GGAAGGACTGCAAACTCCAC
POU2F2_+_42636228.23-P1P2	CRISPRi	GCCTCATGTGGAGAACCAGT
TOP2A_-_38573777.23-P1P2	CRISPRi	GGGATCCACTACGGGACCAA
STAT6_+_57505147.23-P1P2	CRISPRi	GAGGAGAAGCCGGAAACAGC
MS4A1_+_60223356.23-P1P2	CRISPRi	GTGCTAGCTGCGGAGTTCAG
ABCC1_+_16043347.23-P1P2	CRISPRa	GACCTCGCGCGTCTCGGCGT
ABCB1_-_87342724.23-ENST00000265724.3	CRISPRa	GAAAACCCAAGGATAAGTTT
ABCG2_-_89080233.23-P1P2	CRISPRa	GGTACCACCGCCCTCCCTCG
GCLC_-_53410024.23-P1P2	CRISPRa	GGGCTCAGGAGGCGTGTGCA
NFE2L2_+_178129667.23-P1	CRISPRa	GGCCGGCACCGGGGAGCTAA
TOB1_-_48943950.23-P1P2	CRISPRa	GCGCGGCGGACGCAGGGGTG
ANP32B_+_100745411.23-P1P2	CRISPRa	GAAAGGCGCAGCCCGAATAG
SOX18_+_62681082.23-P1P2	CRISPRa	GAGAAGAAAGGGAGCCCCCG
